# Supplementary material for: Human brain ancestral barcodes
Source: eLife. 2025 Jun 10;13:RP101163. doi: 10.7554/eLife.101163 (PMC12151537; doi:10.7554/eLife.101163)
Supplement: Supplementary file 1. [file elife-101163-supp1.xlsx]

## Sheet: fCpG annotation
	<chr>	<int>
1	hg19_cpg_inter	25822
2	hg19_cpg_islands	1027
3	hg19_cpg_shelves	1318
4	hg19_cpg_shores	3427
5	hg19_genes_1to5kb	2439
6	hg19_genes_3UTRs	595
7	hg19_genes_5UTRs	262
8	hg19_genes_exons	2162
9	hg19_genes_intergenic	15322
10	hg19_genes_intronexonboundaries	1609
11	hg19_genes_introns	12799		fraction in gene promoters or bodies
12	hg19_genes_promoters	1276	5047	0.159746
	TOTAL fXCpG		31594
	QDNAseq package
	Scheinin I, Sie D, Bengtsson H, van de Wiel MA, Olshen AB, van Thuijl HF, van Essen HF, Eijk PP, Rustenburg F, Meijer GA, Reijneveld JC, Wesseling P, Pinkel D, Albertson DG, Ylstra B (2014). “DNA copy number analysis of fresh and formalin-fixed specimens by shallow whole-genome sequencing with identification and exclusion of problematic regions in the genome assembly.” Genome Research, 24, 2022–2…
