# Supplementary material for: Human brain ancestral barcodes
Source: eLife. 2025 Jun 10;13:RP101163. doi: 10.7554/eLife.101163 (PMC12151537; doi:10.7554/eLife.101163)
Supplement: Supplementary file 2. [file elife-101163-supp2.xlsx]

## Sheet: fXCpG list
hg38	unique values 0.25 t0 075 7male neurons	hg38		hg19fXcpg
114470309	chrX	114470309	114470310	113704762
155641551	chrX	155641551	155641552	154871212
155641611	chrX	155641611	155641612	154871272
155641614	chrX	155641614	155641615	154871275
155641607	chrX	155641607	155641608	154871268
155641532	chrX	155641532	155641533	154871193
155641719	chrX	155641719	155641720	154871380
62504104	chrX	62504104	62504105	61723574
100137679	chrX	100137679	100137680	99392677
62885792	chrX	62885792	62885793	62105262
74805056	chrX	74805056	74805057	74024891
103566501	chrX	103566501	103566502	102821429
58209983	chrX	58209983	58209984	58236417
67850727	chrX	67850727	67850728	67070569
71423273	chrX	71423273	71423274	70643123
55603938	chrX	55603938	55603939	55630371
133984244	chrX	133984244	133984245	133118271
58238065	chrX	58238065	58238066	58264499
12432610	chrX	12432610	12432611	12450729
33133808	chrX	33133808	33133809	33151925
55292785	chrX	55292785	55292786	55319218
55292887	chrX	55292887	55292888	55319320
56208906	chrX	56208906	56208907	56235339
57814429	chrX	57814429	57814430	57840862
58121044	chrX	58121044	58121045	58147478
58183034	chrX	58183034	58183035	58209468
58207878	chrX	58207878	58207879	58234312
64626403	chrX	64626403	64626404	63846283
130920489	chrX	130920489	130920490	130054463
41919810	chrX	41919810	41919811	41779063
45435928	chrX	45435928	45435929	45295173
57816900	chrX	57816900	57816901	57843333
58043467	chrX	58043467	58043468	58069901
58120663	chrX	58120663	58120664	58147097
63103255	chrX	63103255	63103256	62322725
106863242	chrX	106863242	106863243	106106472
118345341	chrX	118345341	118345342	117479304
130434222	chrX	130434222	130434223	129568196
11760162	chrX	11760162	11760163	11778281
14386885	chrX	14386885	14386886	14405007
15674243	chrX	15674243	15674244	15692366
16946224	chrX	16946224	16946225	16964347
27884817	chrX	27884817	27884818	27902934
43349637	chrX	43349637	43349638	43208886
49230239	chrX	49230239	49230240	49086701
53000537	chrX	53000537	53000538	53029716
56935772	chrX	56935772	56935773	56962205
57816240	chrX	57816240	57816241	57842673
58087083	chrX	58087083	58087084	58113517
58106131	chrX	58106131	58106132	58132565
58177503	chrX	58177503	58177504	58203937
58300321	chrX	58300321	58300322	58326754
58343734	chrX	58343734	58343735	58370167
58381287	chrX	58381287	58381288	58407720
58422951	chrX	58422951	58422952	58449384
58424936	chrX	58424936	58424937	58451369
58513305	chrX	58513305	58513306	58539738
63767236	chrX	63767236	63767237	62987116
67192080	chrX	67192080	67192081	66411922
67543501	chrX	67543501	67543502	66763343
71053396	chrX	71053396	71053397	70273246
73128301	chrX	73128301	73128302	72348140
108391512	chrX	108391512	108391513	107634742
116198863	chrX	116198863	116198864	115330116
127269016	chrX	127269016	127269017	126402999
129566119	chrX	129566119	129566120	128700096
135336466	chrX	135336466	135336467	134470391
7927009	chrX	7927009	7927010	7895050
8783259	chrX	8783259	8783260	8751300
19542110	chrX	19542110	19542111	19560228
28716141	chrX	28716141	28716142	28734258
38664656	chrX	38664656	38664657	38523910
48581970	chrX	48581970	48581971	48440358
55814167	chrX	55814167	55814168	55840600
56674279	chrX	56674279	56674280	56700712
56947582	chrX	56947582	56947583	56974015
58227952	chrX	58227952	58227953	58254386
58233945	chrX	58233945	58233946	58260379
58237111	chrX	58237111	58237112	58263545
62466047	chrX	62466047	62466048	61685517
62467084	chrX	62467084	62467085	61686554
62504300	chrX	62504300	62504301	61723770
62542473	chrX	62542473	62542474	61761943
62714414	chrX	62714414	62714415	61933884
62859529	chrX	62859529	62859530	62078999
64476048	chrX	64476048	64476049	63695928
64487455	chrX	64487455	64487456	63707335
64894664	chrX	64894664	64894665	64114544
66313477	chrX	66313477	66313478	65533319
66398716	chrX	66398716	66398717	65618558
69429753	chrX	69429753	69429754	68649596
73423438	chrX	73423438	73423439	72643274
76577662	chrX	76577662	76577663	75798054
82894502	chrX	82894502	82894503	82149510
87708800	chrX	87708800	87708801	86963800
127048314	chrX	127048314	127048315	126182297
7594966	chrX	7594966	7594967	7513007
7927053	chrX	7927053	7927054	7895094
7927059	chrX	7927059	7927060	7895100
14030661	chrX	14030661	14030662	14048780
15336956	chrX	15336956	15336957	15355078
19908775	chrX	19908775	19908776	19926893
24648097	chrX	24648097	24648098	24666214
24839459	chrX	24839459	24839460	24857576
28644497	chrX	28644497	28644498	28662614
34652220	chrX	34652220	34652221	34670337
37919148	chrX	37919148	37919149	37778401
46910384	chrX	46910384	46910385	46769819
48477257	chrX	48477257	48477258	48335645
54870812	chrX	54870812	54870813	54897245
55376125	chrX	55376125	55376126	55402558
55422716	chrX	55422716	55422717	55449149
55628532	chrX	55628532	55628533	55654965
55697053	chrX	55697053	55697054	55723486
56508284	chrX	56508284	56508285	56534717
56890909	chrX	56890909	56890910	56917342
57547707	chrX	57547707	57547708	57574140
58015710	chrX	58015710	58015711	58042144
58042331	chrX	58042331	58042332	58068765
58043415	chrX	58043415	58043416	58069849
58227857	chrX	58227857	58227858	58254291
62757213	chrX	62757213	62757214	61976683
62888187	chrX	62888187	62888188	62107657
62961881	chrX	62961881	62961882	62181351
65451795	chrX	65451795	65451796	64671675
66287906	chrX	66287906	66287907	65507748
66553025	chrX	66553025	66553026	65772867
66565992	chrX	66565992	66565993	65785834
72255955	chrX	72255955	72255956	71475805
77160509	chrX	77160509	77160510	76380971
78591656	chrX	78591656	78591657	77847153
81401848	chrX	81401848	81401849	80657347
101317870	chrX	101317870	101317871	100572858
104423934	chrX	104423934	104423935	103668615
111849558	chrX	111849558	111849559	111092786
112163031	chrX	112163031	112163032	111406259
112679644	chrX	112679644	112679645	111922872
122363284	chrX	122363284	122363285	121497137
130906074	chrX	130906074	130906075	130040048
140439857	chrX	140439857	140439858	139522022
152658488	chrX	152658488	152658489	151826953
155086623	chrX	155086623	155086624	154314898
5896783	chrX	5896783	5896784	5814824
11769959	chrX	11769959	11769960	11788078
12325538	chrX	12325538	12325539	12343657
12373751	chrX	12373751	12373752	12391870
13732452	chrX	13732452	13732453	13750571
16440889	chrX	16440889	16440890	16459012
21053894	chrX	21053894	21053895	21072012
21953220	chrX	21953220	21953221	21971338
23841318	chrX	23841318	23841319	23859435
24392839	chrX	24392839	24392840	24410956
24692579	chrX	24692579	24692580	24710696
27308267	chrX	27308267	27308268	27326384
36963344	chrX	36963344	36963345	36981417
36963353	chrX	36963353	36963354	36981426
37711269	chrX	37711269	37711270	37570522
48699017	chrX	48699017	48699018	48557408
48699047	chrX	48699047	48699048	48557438
49116118	chrX	49116118	49116119	48972472
49171145	chrX	49171145	49171146	49027496
49760677	chrX	49760677	49760678	49525280
55352708	chrX	55352708	55352709	55379141
55443713	chrX	55443713	55443714	55470146
55660411	chrX	55660411	55660412	55686844
55702713	chrX	55702713	55702714	55729146
55716055	chrX	55716055	55716056	55742488
57753806	chrX	57753806	57753807	57780239
58040342	chrX	58040342	58040343	58066776
58124368	chrX	58124368	58124369	58150802
58139329	chrX	58139329	58139330	58165763
58139768	chrX	58139768	58139769	58166202
58198767	chrX	58198767	58198768	58225201
58291860	chrX	58291860	58291861	58318293
58386036	chrX	58386036	58386037	58412469
58417763	chrX	58417763	58417764	58444196
62521408	chrX	62521408	62521409	61740878
62864750	chrX	62864750	62864751	62084220
62889127	chrX	62889127	62889128	62108597
62973254	chrX	62973254	62973255	62192724
63093863	chrX	63093863	63093864	62313333
64018614	chrX	64018614	64018615	63238494
64704828	chrX	64704828	64704829	63924708
66280355	chrX	66280355	66280356	65500197
66365833	chrX	66365833	66365834	65585675
71170789	chrX	71170789	71170790	70390639
72571757	chrX	72571757	72571758	71791607
74705471	chrX	74705471	74705472	73925306
75155314	chrX	75155314	75155315	74375149
76521182	chrX	76521182	76521183	75741594
76682389	chrX	76682389	76682390	75902783
77347707	chrX	77347707	77347708	76568170
79366143	chrX	79366143	79366144	78621640
81735278	chrX	81735278	81735279	80990777
87073845	chrX	87073845	87073846	86328848
93299941	chrX	93299941	93299942	92554940
100366514	chrX	100366514	100366515	99621512
101415468	chrX	101415468	101415469	100670456
104252892	chrX	104252892	104252893	103497573
104288828	chrX	104288828	104288829	103533509
108733235	chrX	108733235	108733236	107976465
119994824	chrX	119994824	119994825	119128787
119994883	chrX	119994883	119994884	119128846
121228152	chrX	121228152	121228153	120362006
126305448	chrX	126305448	126305449	125439431
126552305	chrX	126552305	126552306	125686288
143058065	chrX	143058065	143058066	142145851
147330803	chrX	147330803	147330804	146412321
151176838	chrX	151176838	151176839	150345310
151177041	chrX	151177041	151177042	150345513
3526349	chrX	3526349	3526350	3444390
7347785	chrX	7347785	7347786	7265826
8783049	chrX	8783049	8783050	8751090
11970879	chrX	11970879	11970880	11988998
13569431	chrX	13569431	13569432	13587550
17361827	chrX	17361827	17361828	17379950
20336651	chrX	20336651	20336652	20354769
25083850	chrX	25083850	25083851	25101967
27186768	chrX	27186768	27186769	27204885
31234364	chrX	31234364	31234365	31252481
41917209	chrX	41917209	41917210	41776462
42818422	chrX	42818422	42818423	42677673
48827653	chrX	48827653	48827654	48686063
54969433	chrX	54969433	54969434	54995866
55234959	chrX	55234959	55234960	55261392
55621870	chrX	55621870	55621871	55648303
56358282	chrX	56358282	56358283	56384715
56642559	chrX	56642559	56642560	56668992
58091036	chrX	58091036	58091037	58117470
58107316	chrX	58107316	58107317	58133750
58124789	chrX	58124789	58124790	58151223
58126782	chrX	58126782	58126783	58153216
58191274	chrX	58191274	58191275	58217708
58191571	chrX	58191571	58191572	58218005
58216454	chrX	58216454	58216455	58242888
58220778	chrX	58220778	58220779	58247212
58228684	chrX	58228684	58228685	58255118
58291890	chrX	58291890	58291891	58318323
58344931	chrX	58344931	58344932	58371364
58453656	chrX	58453656	58453657	58480089
62463206	chrX	62463206	62463207	61682676
63046298	chrX	63046298	63046299	62265768
63055924	chrX	63055924	63055925	62275394
64666355	chrX	64666355	64666356	63886235
64879184	chrX	64879184	64879185	64099064
66222435	chrX	66222435	66222436	65442277
66423594	chrX	66423594	66423595	65643436
67547198	chrX	67547198	67547199	66767040
76841003	chrX	76841003	76841004	76061428
95340294	chrX	95340294	95340295	94595293
99940117	chrX	99940117	99940118	99195115
106397292	chrX	106397292	106397293	105640522
106894883	chrX	106894883	106894884	106138113
108709866	chrX	108709866	108709867	107953096
113585355	chrX	113585355	113585356	112828642
116087805	chrX	116087805	116087806	115219058
119993186	chrX	119993186	119993187	119127149
119994894	chrX	119994894	119994895	119128857
120575878	chrX	120575878	120575879	119709733
130118672	chrX	130118672	130118673	129252647
136489086	chrX	136489086	136489087	135571245
138191819	chrX	138191819	138191820	137273978
149437843	chrX	149437843	149437844	148519374
149800506	chrX	149800506	149800507	148882168
152500028	chrX	152500028	152500029	151668500
152637418	chrX	152637418	152637419	151805872
155267035	chrX	155267035	155267036	154496320
12309871	chrX	12309871	12309872	12327990
13652405	chrX	13652405	13652406	13670524
15737632	chrX	15737632	15737633	15755755
17072936	chrX	17072936	17072937	17091059
18368887	chrX	18368887	18368888	18387007
21802482	chrX	21802482	21802483	21820600
23906876	chrX	23906876	23906877	23924993
30468763	chrX	30468763	30468764	30486880
38125560	chrX	38125560	38125561	37984813
42531567	chrX	42531567	42531568	42390819
47645050	chrX	47645050	47645051	47504449
47835672	chrX	47835672	47835673	47695071
48473525	chrX	48473525	48473526	48331913
49219863	chrX	49219863	49219864	49076322
54680356	chrX	54680356	54680357	54706789
58002555	chrX	58002555	58002556	58028989
58034883	chrX	58034883	58034884	58061317
58128794	chrX	58128794	58128795	58155228
58148663	chrX	58148663	58148664	58175097
58150368	chrX	58150368	58150369	58176802
58156272	chrX	58156272	58156273	58182706
58175961	chrX	58175961	58175962	58202395
58192113	chrX	58192113	58192114	58218547
58194063	chrX	58194063	58194064	58220497
58209377	chrX	58209377	58209378	58235811
58213939	chrX	58213939	58213940	58240373
58277396	chrX	58277396	58277397	58303830
58360601	chrX	58360601	58360602	58387034
58425697	chrX	58425697	58425698	58452130
62755157	chrX	62755157	62755158	61974627
62879909	chrX	62879909	62879910	62099379
62923170	chrX	62923170	62923171	62142640
62944000	chrX	62944000	62944001	62163470
63018150	chrX	63018150	63018151	62237620
64666535	chrX	64666535	64666536	63886415
64809033	chrX	64809033	64809034	64028913
66420438	chrX	66420438	66420439	65640280
68428598	chrX	68428598	68428599	67648440
70290900	chrX	70290900	70290901	69510750
70661269	chrX	70661269	70661270	69881119
73187743	chrX	73187743	73187744	72407579
76358770	chrX	76358770	76358771	75579169
77192582	chrX	77192582	77192583	76413045
77223803	chrX	77223803	77223804	76444266
77740853	chrX	77740853	77740854	76996332
77896377	chrX	77896377	77896378	77151874
94831925	chrX	94831925	94831926	94086924
111189514	chrX	111189514	111189515	110432742
111519434	chrX	111519434	111519435	110762662
117081858	chrX	117081858	117081859	116215826
119570625	chrX	119570625	119570626	118704588
119588592	chrX	119588592	119588593	118722555
119617583	chrX	119617583	119617584	118751546
119993531	chrX	119993531	119993532	119127494
119994902	chrX	119994902	119994903	119128865
122300980	chrX	122300980	122300981	121434833
123272233	chrX	123272233	123272234	122406084
123486549	chrX	123486549	123486550	122620400
126676918	chrX	126676918	126676919	125810901
129739432	chrX	129739432	129739433	128873408
134543380	chrX	134543380	134543381	133677410
136162897	chrX	136162897	136162898	135245056
137646912	chrX	137646912	137646913	136729071
139961297	chrX	139961297	139961298	139043456
153032492	chrX	153032492	153032493	152200838
154505965	chrX	154505965	154505966	153734296
155217766	chrX	155217766	155217767	154446043
9420955	chrX	9420955	9420956	9388995
11215315	chrX	11215315	11215316	11233435
12974064	chrX	12974064	12974065	12992183
17086002	chrX	17086002	17086003	17104125
21656501	chrX	21656501	21656502	21674619
34566166	chrX	34566166	34566167	34584283
36986574	chrX	36986574	36986575	37004647
41270762	chrX	41270762	41270763	41130015
48904414	chrX	48904414	48904415	48761691
48912571	chrX	48912571	48912572	48769848
49225964	chrX	49225964	49225965	49082426
50530739	chrX	50530739	50530740	50273739
51494294	chrX	51494294	51494295	51237146
51867525	chrX	51867525	51867526	51610621
51899037	chrX	51899037	51899038	51642133
53528808	chrX	53528808	53528809	53555772
55449095	chrX	55449095	55449096	55475528
55671426	chrX	55671426	55671427	55697859
56912671	chrX	56912671	56912672	56939104
56913826	chrX	56913826	56913827	56940259
57498483	chrX	57498483	57498484	57524916
57842329	chrX	57842329	57842330	57868762
58064675	chrX	58064675	58064676	58091109
58080655	chrX	58080655	58080656	58107089
58081369	chrX	58081369	58081370	58107803
58106519	chrX	58106519	58106520	58132953
58122369	chrX	58122369	58122370	58148803
58122439	chrX	58122439	58122440	58148873
58125641	chrX	58125641	58125642	58152075
58160933	chrX	58160933	58160934	58187367
58210646	chrX	58210646	58210647	58237080
58238450	chrX	58238450	58238451	58264884
58339810	chrX	58339810	58339811	58366243
58382613	chrX	58382613	58382614	58409046
58414378	chrX	58414378	58414379	58440811
58418142	chrX	58418142	58418143	58444575
58440376	chrX	58440376	58440377	58466809
62541771	chrX	62541771	62541772	61761241
62711936	chrX	62711936	62711937	61931406
62837249	chrX	62837249	62837250	62056719
62870657	chrX	62870657	62870658	62090127
65620251	chrX	65620251	65620252	64840130
66692644	chrX	66692644	66692645	65912486
70969885	chrX	70969885	70969886	70189735
71878800	chrX	71878800	71878801	71098650
73447396	chrX	73447396	73447397	72667232
73511415	chrX	73511415	73511416	72731251
73511423	chrX	73511423	73511424	72731259
75706199	chrX	75706199	75706200	74926034
78106338	chrX	78106338	78106339	77361835
81878456	chrX	81878456	81878457	81133955
85994333	chrX	85994333	85994334	85249337
101264028	chrX	101264028	101264029	100519017
101392380	chrX	101392380	101392381	100647368
104607288	chrX	104607288	104607289	103851969
106354007	chrX	106354007	106354008	105597236
108001660	chrX	108001660	108001661	107244890
112883725	chrX	112883725	112883726	112126953
117646732	chrX	117646732	117646733	116780695
119994645	chrX	119994645	119994646	119128608
129572604	chrX	129572604	129572605	128706581
129852841	chrX	129852841	129852842	128986817
146596585	chrX	146596585	146596586	145678103
149471569	chrX	149471569	149471570	148553100
154303837	chrX	154303837	154303838	153532189
154410827	chrX	154410827	154410828	153639163
154751642	chrX	154751642	154751643	153979917
155094749	chrX	155094749	155094750	154323024
3781334	chrX	3781334	3781335	3699375
6059379	chrX	6059379	6059380	5977420
6200304	chrX	6200304	6200305	6118345
7636143	chrX	7636143	7636144	7554184
9885493	chrX	9885493	9885494	9853533
10174885	chrX	10174885	10174886	10142925
10755605	chrX	10755605	10755606	10723645
15956818	chrX	15956818	15956819	15974941
18676583	chrX	18676583	18676584	18694703
21604304	chrX	21604304	21604305	21622422
24053853	chrX	24053853	24053854	24071970
24294698	chrX	24294698	24294699	24312815
25382677	chrX	25382677	25382678	25400794
26906252	chrX	26906252	26906253	26924369
29468996	chrX	29468996	29468997	29487113
38055079	chrX	38055079	38055080	37914332
40092350	chrX	40092350	40092351	39951603
45057044	chrX	45057044	45057045	44916289
48561578	chrX	48561578	48561579	48419966
48736292	chrX	48736292	48736293	48594696
48738188	chrX	48738188	48738189	48596595
48819612	chrX	48819612	48819613	48678019
48938714	chrX	48938714	48938715	48795985
49213741	chrX	49213741	49213742	49070201
49230175	chrX	49230175	49230176	49086637
53356339	chrX	53356339	53356340	53383262
54478833	chrX	54478833	54478834	54505266
55608883	chrX	55608883	55608884	55635316
56685220	chrX	56685220	56685221	56711653
56734164	chrX	56734164	56734165	56760597
57163395	chrX	57163395	57163396	57189828
57346487	chrX	57346487	57346488	57372920
57583030	chrX	57583030	57583031	57609463
57832839	chrX	57832839	57832840	57859272
58027119	chrX	58027119	58027120	58053553
58054386	chrX	58054386	58054387	58080820
58080603	chrX	58080603	58080604	58107037
58084712	chrX	58084712	58084713	58111146
58103753	chrX	58103753	58103754	58130187
58146684	chrX	58146684	58146685	58173118
58190238	chrX	58190238	58190239	58216672
58198041	chrX	58198041	58198042	58224475
58237683	chrX	58237683	58237684	58264117
58241412	chrX	58241412	58241413	58267846
58279581	chrX	58279581	58279582	58306015
58373448	chrX	58373448	58373449	58399881
62499992	chrX	62499992	62499993	61719462
62517442	chrX	62517442	62517443	61736912
62519294	chrX	62519294	62519295	61738764
62869862	chrX	62869862	62869863	62089332
62980044	chrX	62980044	62980045	62199514
63069022	chrX	63069022	63069023	62288492
63098010	chrX	63098010	63098011	62317480
64018571	chrX	64018571	64018572	63238451
65408568	chrX	65408568	65408569	64628448
65408730	chrX	65408730	65408731	64628610
65537601	chrX	65537601	65537602	64757481
69535316	chrX	69535316	69535317	68755159
70085473	chrX	70085473	70085474	69305323
70265037	chrX	70265037	70265038	69484887
73447343	chrX	73447343	73447344	72667179
73449603	chrX	73449603	73449604	72669439
73727364	chrX	73727364	73727365	72947199
75232296	chrX	75232296	75232297	74452131
77331262	chrX	77331262	77331263	76551725
85427577	chrX	85427577	85427578	84682582
92721341	chrX	92721341	92721342	91976340
94730516	chrX	94730516	94730517	93985515
101171989	chrX	101171989	101171990	100426978
102084813	chrX	102084813	102084814	101339785
104155908	chrX	104155908	104155909	103400589
104581150	chrX	104581150	104581151	103825831
110409158	chrX	110409158	110409159	109652386
111140065	chrX	111140065	111140066	110383293
111221608	chrX	111221608	111221609	110464836
111308375	chrX	111308375	111308376	110551603
111407340	chrX	111407340	111407341	110650568
113585374	chrX	113585374	113585375	112828661
118115381	chrX	118115381	118115382	117249344
119273166	chrX	119273166	119273167	118407129
119694158	chrX	119694158	119694159	118828121
123283532	chrX	123283532	123283533	122417383
123977614	chrX	123977614	123977615	123111464
123986757	chrX	123986757	123986758	123120607
129655377	chrX	129655377	129655378	128789354
130297073	chrX	130297073	130297074	129431047
130339332	chrX	130339332	130339333	129473306
130959252	chrX	130959252	130959253	130093226
130976579	chrX	130976579	130976580	130110553
131579151	chrX	131579151	131579152	130713125
134795905	chrX	134795905	134795906	133929935
135972301	chrX	135972301	135972302	135054460
136877727	chrX	136877727	136877728	135959886
140289783	chrX	140289783	140289784	139371948
147921850	chrX	147921850	147921851	147003368
148806365	chrX	148806365	148806366	147887889
152489813	chrX	152489813	152489814	151658285
152942289	chrX	152942289	152942290	152110833
3076646	chrX	3076646	3076647	2994687
6279950	chrX	6279950	6279951	6197991
7287102	chrX	7287102	7287103	7205143
14033232	chrX	14033232	14033233	14051351
17721822	chrX	17721822	17721823	17739942
17841679	chrX	17841679	17841680	17859799
21039661	chrX	21039661	21039662	21057779
21657878	chrX	21657878	21657879	21675996
23643763	chrX	23643763	23643764	23661880
24270029	chrX	24270029	24270030	24288146
24294747	chrX	24294747	24294748	24312864
24347705	chrX	24347705	24347706	24365822
24392971	chrX	24392971	24392972	24411088
27863992	chrX	27863992	27863993	27882109
30560921	chrX	30560921	30560922	30579038
31083006	chrX	31083006	31083007	31101123
36019128	chrX	36019128	36019129	36037245
39089092	chrX	39089092	39089093	38948345
43940961	chrX	43940961	43940962	43800207
47687264	chrX	47687264	47687265	47546663
50471997	chrX	50471997	50471998	50214997
50876544	chrX	50876544	50876545	50619544
52550728	chrX	52550728	52550729	52579740
53000864	chrX	53000864	53000865	53030043
53080492	chrX	53080492	53080493	53109674
53351969	chrX	53351969	53351970	53378878
54902903	chrX	54902903	54902904	54929336
55483823	chrX	55483823	55483824	55510256
56459299	chrX	56459299	56459300	56485732
56890592	chrX	56890592	56890593	56917025
56905203	chrX	56905203	56905204	56931636
56912255	chrX	56912255	56912256	56938688
57721539	chrX	57721539	57721540	57747972
57956968	chrX	57956968	57956969	57983402
57998595	chrX	57998595	57998596	58025029
58049177	chrX	58049177	58049178	58075611
58103775	chrX	58103775	58103776	58130209
58149506	chrX	58149506	58149507	58175940
58162997	chrX	58162997	58162998	58189431
58176156	chrX	58176156	58176157	58202590
58188378	chrX	58188378	58188379	58214812
58367292	chrX	58367292	58367293	58393725
58397215	chrX	58397215	58397216	58423648
58414239	chrX	58414239	58414240	58440672
58414985	chrX	58414985	58414986	58441418
62517453	chrX	62517453	62517454	61736923
62682064	chrX	62682064	62682065	61901534
62714802	chrX	62714802	62714803	61934272
62721552	chrX	62721552	62721553	61941022
62850751	chrX	62850751	62850752	62070221
62885398	chrX	62885398	62885399	62104868
63350009	chrX	63350009	63350010	62569888
63873000	chrX	63873000	63873001	63092880
70501284	chrX	70501284	70501285	69721134
71128655	chrX	71128655	71128656	70348505
72274752	chrX	72274752	72274753	71494602
73128382	chrX	73128382	73128383	72348221
73447322	chrX	73447322	73447323	72667158
73447505	chrX	73447505	73447506	72667341
76522128	chrX	76522128	76522129	75742540
76558364	chrX	76558364	76558365	75778772
76627595	chrX	76627595	76627596	75848004
77347823	chrX	77347823	77347824	76568286
78928334	chrX	78928334	78928335	78183831
79413535	chrX	79413535	79413536	78669032
80334954	chrX	80334954	80334955	79590453
82709032	chrX	82709032	82709033	81964481
83503950	chrX	83503950	83503951	82758958
89557314	chrX	89557314	89557315	88812313
91771296	chrX	91771296	91771297	91026295
101569692	chrX	101569692	101569693	100824667
102770187	chrX	102770187	102770188	102025115
107155904	chrX	107155904	107155905	106399134
108268584	chrX	108268584	108268585	107511814
108437390	chrX	108437390	108437391	107680620
113380894	chrX	113380894	113380895	112624121
115312074	chrX	115312074	115312075	114546641
118286534	chrX	118286534	118286535	117420497
118383314	chrX	118383314	118383315	117517277
118474734	chrX	118474734	118474735	117608697
118823189	chrX	118823189	118823190	117957152
119989753	chrX	119989753	119989754	119123716
120598924	chrX	120598924	120598925	119732779
123963838	chrX	123963838	123963839	123097688
125556641	chrX	125556641	125556642	124690490
129739093	chrX	129739093	129739094	128873069
129925335	chrX	129925335	129925336	129059311
130563395	chrX	130563395	130563396	129697369
131084917	chrX	131084917	131084918	130218891
134533205	chrX	134533205	134533206	133667235
134990635	chrX	134990635	134990636	134124665
135920784	chrX	135920784	135920785	135002943
136499023	chrX	136499023	136499024	135581182
136499356	chrX	136499356	136499357	135581515
138716015	chrX	138716015	138716016	137798177
139202367	chrX	139202367	139202368	138284529
140141799	chrX	140141799	140141800	139223958
141183456	chrX	141183456	141183457	140277633
142601658	chrX	142601658	142601659	141689444
143857596	chrX	143857596	143857597	142940690
149377123	chrX	149377123	149377124	148458653
150293390	chrX	150293390	150293391	149461623
155217739	chrX	155217739	155217740	154446016
6279931	chrX	6279931	6279932	6197972
9240053	chrX	9240053	9240054	9208093
12354580	chrX	12354580	12354581	12372699
13654089	chrX	13654089	13654090	13672208
14872184	chrX	14872184	14872185	14890306
15628275	chrX	15628275	15628276	15646398
15852403	chrX	15852403	15852404	15870526
17606977	chrX	17606977	17606978	17625097
18628716	chrX	18628716	18628717	18646836
19513988	chrX	19513988	19513989	19532106
21656131	chrX	21656131	21656132	21674249
21656213	chrX	21656213	21656214	21674331
24015050	chrX	24015050	24015051	24033167
24692475	chrX	24692475	24692476	24710592
26876933	chrX	26876933	26876934	26895050
44253367	chrX	44253367	44253368	44112613
46380748	chrX	46380748	46380749	46240183
50467866	chrX	50467866	50467867	50210865
50988341	chrX	50988341	50988342	50731341
51809304	chrX	51809304	51809305	51552400
56715297	chrX	56715297	56715298	56741730
57810801	chrX	57810801	57810802	57837234
58048117	chrX	58048117	58048118	58074551
58103895	chrX	58103895	58103896	58130329
58113722	chrX	58113722	58113723	58140156
58136308	chrX	58136308	58136309	58162742
58140397	chrX	58140397	58140398	58166831
58153280	chrX	58153280	58153281	58179714
58162812	chrX	58162812	58162813	58189246
58173899	chrX	58173899	58173900	58200333
58227011	chrX	58227011	58227012	58253445
58246012	chrX	58246012	58246013	58272446
58249585	chrX	58249585	58249586	58276019
62560404	chrX	62560404	62560405	61779874
62918204	chrX	62918204	62918205	62137674
63019015	chrX	63019015	63019016	62238485
64230322	chrX	64230322	64230323	63450202
66285621	chrX	66285621	66285622	65505463
71053278	chrX	71053278	71053279	70273128
73231849	chrX	73231849	73231850	72451685
73562337	chrX	73562337	73562338	72782173
77223190	chrX	77223190	77223191	76443653
78913335	chrX	78913335	78913336	78168832
79252429	chrX	79252429	79252430	78507926
81980227	chrX	81980227	81980228	81235676
85427607	chrX	85427607	85427608	84682612
91664146	chrX	91664146	91664147	90919145
94543315	chrX	94543315	94543316	93798314
95057208	chrX	95057208	95057209	94312207
96001263	chrX	96001263	96001264	95256262
97594779	chrX	97594779	97594780	96849778
102341895	chrX	102341895	102341896	101596818
102659550	chrX	102659550	102659551	101914478
106493874	chrX	106493874	106493875	105737104
108442914	chrX	108442914	108442915	107686144
109337567	chrX	109337567	109337568	108580796
115331074	chrX	115331074	115331075	114565659
119669713	chrX	119669713	119669714	118803676
119982186	chrX	119982186	119982187	119116149
120857361	chrX	120857361	120857362	119991215
123581904	chrX	123581904	123581905	122715755
128246369	chrX	128246369	128246370	127380346
131887491	chrX	131887491	131887492	131021519
132975325	chrX	132975325	132975326	132109353
134426402	chrX	134426402	134426403	133560432
134753869	chrX	134753869	134753870	133887899
135683635	chrX	135683635	135683636	134817350
136526314	chrX	136526314	136526315	135608473
146211044	chrX	146211044	146211045	145292562
154741228	chrX	154741228	154741229	153969503
5717435	chrX	5717435	5717436	5635476
5959363	chrX	5959363	5959364	5877404
11724315	chrX	11724315	11724316	11742435
16713310	chrX	16713310	16713311	16731433
16867419	chrX	16867419	16867420	16885542
17606882	chrX	17606882	17606883	17625002
20118737	chrX	20118737	20118738	20136855
21655987	chrX	21655987	21655988	21674105
21656771	chrX	21656771	21656772	21674889
36984566	chrX	36984566	36984567	37002639
39697395	chrX	39697395	39697396	39556649
39814597	chrX	39814597	39814598	39673851
41341331	chrX	41341331	41341332	41200584
43191330	chrX	43191330	43191331	43050579
44036565	chrX	44036565	44036566	43895811
45233676	chrX	45233676	45233677	45092921
47754357	chrX	47754357	47754358	47613756
48728369	chrX	48728369	48728370	48586774
54640262	chrX	54640262	54640263	54666695
55206571	chrX	55206571	55206572	55233004
56452858	chrX	56452858	56452859	56479291
56880308	chrX	56880308	56880309	56906741
57583373	chrX	57583373	57583374	57609806
57870985	chrX	57870985	57870986	57897419
58035811	chrX	58035811	58035812	58062245
58216071	chrX	58216071	58216072	58242505
58290194	chrX	58290194	58290195	58316627
58355163	chrX	58355163	58355164	58381596
58510634	chrX	58510634	58510635	58537067
62862446	chrX	62862446	62862447	62081916
62867835	chrX	62867835	62867836	62087305
62887926	chrX	62887926	62887927	62107396
65542557	chrX	65542557	65542558	64762437
65891850	chrX	65891850	65891851	65111692
66577498	chrX	66577498	66577499	65797340
67547065	chrX	67547065	67547066	66766907
77285501	chrX	77285501	77285502	76505964
78048379	chrX	78048379	78048380	77303876
79315250	chrX	79315250	79315251	78570747
85109413	chrX	85109413	85109414	84364419
94921043	chrX	94921043	94921044	94176042
100732551	chrX	100732551	100732552	99987538
103220820	chrX	103220820	103220821	102475748
103348134	chrX	103348134	103348135	102603062
103348212	chrX	103348212	103348213	102603140
104162436	chrX	104162436	104162437	103407117
104241459	chrX	104241459	104241460	103486140
104910242	chrX	104910242	104910243	104154923
106179528	chrX	106179528	106179529	105423521
110082568	chrX	110082568	110082569	109325796
112038436	chrX	112038436	112038437	111281664
119942453	chrX	119942453	119942454	119076416
120001860	chrX	120001860	120001861	119135817
120016885	chrX	120016885	120016886	119150842
122103441	chrX	122103441	122103442	121237294
123101242	chrX	123101242	123101243	122235095
126552218	chrX	126552218	126552219	125686201
129937208	chrX	129937208	129937209	129071184
129956692	chrX	129956692	129956693	129090668
130121470	chrX	130121470	130121471	129255445
131314387	chrX	131314387	131314388	130448361
134753874	chrX	134753874	134753875	133887904
134795985	chrX	134795985	134795986	133930015
136489042	chrX	136489042	136489043	135571201
136954849	chrX	136954849	136954850	136037008
146824516	chrX	146824516	146824517	145906034
148915609	chrX	148915609	148915610	147997139
151184116	chrX	151184116	151184117	150352588
154763944	chrX	154763944	154763945	153992219
6280018	chrX	6280018	6280019	6198059
7198897	chrX	7198897	7198898	7116938
7996447	chrX	7996447	7996448	7964488
20518034	chrX	20518034	20518035	20536152
24053612	chrX	24053612	24053613	24071729
31416892	chrX	31416892	31416893	31435009
40076456	chrX	40076456	40076457	39935709
40539363	chrX	40539363	40539364	40398615
47185537	chrX	47185537	47185538	47044936
47191961	chrX	47191961	47191962	47051360
49234030	chrX	49234030	49234031	49090489
51262538	chrX	51262538	51262539	51005401
51334220	chrX	51334220	51334221	51077072
51461686	chrX	51461686	51461687	51204538
52081431	chrX	52081431	52081432	51824527
55406849	chrX	55406849	55406850	55433282
55450603	chrX	55450603	55450604	55477036
56996310	chrX	56996310	56996311	57022743
57956850	chrX	57956850	57956851	57983284
58112644	chrX	58112644	58112645	58139078
58150018	chrX	58150018	58150019	58176452
58189264	chrX	58189264	58189265	58215698
58296011	chrX	58296011	58296012	58322444
62487887	chrX	62487887	62487888	61707357
62861714	chrX	62861714	62861715	62081184
63046621	chrX	63046621	63046622	62266091
63098839	chrX	63098839	63098840	62318309
63314510	chrX	63314510	63314511	62534389
63562178	chrX	63562178	63562179	62782058
65300699	chrX	65300699	65300700	64520579
73449478	chrX	73449478	73449479	72669314
77896329	chrX	77896329	77896330	77151826
78230507	chrX	78230507	78230508	77486004
79152305	chrX	79152305	79152306	78407802
84803293	chrX	84803293	84803294	84058300
85991863	chrX	85991863	85991864	85246867
86048372	chrX	86048372	86048373	85303376
92808149	chrX	92808149	92808150	92063148
100863649	chrX	100863649	100863650	100118638
107659564	chrX	107659564	107659565	106902794
112834836	chrX	112834836	112834837	112078064
118024802	chrX	118024802	118024803	117158765
120016919	chrX	120016919	120016920	119150876
136878471	chrX	136878471	136878472	135960630
138610431	chrX	138610431	138610432	137692592
145190504	chrX	145190504	145190505	144272024
154763933	chrX	154763933	154763934	153992208
4810315	chrX	4810315	4810316	4728356
15310551	chrX	15310551	15310552	15328673
24464367	chrX	24464367	24464368	24482484
40083248	chrX	40083248	40083249	39942501
47390717	chrX	47390717	47390718	47250116
50464139	chrX	50464139	50464140	50207138
52992637	chrX	52992637	52992638	53021817
55431075	chrX	55431075	55431076	55457508
55602005	chrX	55602005	55602006	55628438
56618827	chrX	56618827	56618828	56645260
57468343	chrX	57468343	57468344	57494776
57804816	chrX	57804816	57804817	57831249
58221668	chrX	58221668	58221669	58248102
62872569	chrX	62872569	62872570	62092039
62883107	chrX	62883107	62883108	62102577
62987719	chrX	62987719	62987720	62207189
64126445	chrX	64126445	64126446	63346325
64852071	chrX	64852071	64852072	64071951
65017029	chrX	65017029	65017030	64236909
70134650	chrX	70134650	70134651	69354500
71181533	chrX	71181533	71181534	70401383
71882458	chrX	71882458	71882459	71102308
72020286	chrX	72020286	72020287	71240136
73416095	chrX	73416095	73416096	72635931
78532203	chrX	78532203	78532204	77787700
80334930	chrX	80334930	80334931	79590429
80334932	chrX	80334932	80334933	79590431
88246748	chrX	88246748	88246749	87501749
95610474	chrX	95610474	95610475	94865473
96003001	chrX	96003001	96003002	95258000
103348258	chrX	103348258	103348259	102603186
103396357	chrX	103396357	103396358	102651285
105962457	chrX	105962457	105962458	105206449
106132534	chrX	106132534	106132535	105376527
107273111	chrX	107273111	107273112	106516341
117268063	chrX	117268063	117268064	116402026
119223145	chrX	119223145	119223146	118357108
121892809	chrX	121892809	121892810	121026662
132111859	chrX	132111859	132111860	131245887
134427095	chrX	134427095	134427096	133561125
134797844	chrX	134797844	134797845	133931874
136209152	chrX	136209152	136209153	135291311
155307322	chrX	155307322	155307323	154536635
2799944	chrX	2799944	2799945	2717985
11757205	chrX	11757205	11757206	11775324
21506986	chrX	21506986	21506987	21525104
30887704	chrX	30887704	30887705	30905821
36961783	chrX	36961783	36961784	36979856
46130273	chrX	46130273	46130274	45989708
52983245	chrX	52983245	52983246	53012415
54676779	chrX	54676779	54676780	54703212
54830936	chrX	54830936	54830937	54857369
63061053	chrX	63061053	63061054	62280523
73116815	chrX	73116815	73116816	72336654
77456731	chrX	77456731	77456732	76712222
102649372	chrX	102649372	102649373	101904300
103332713	chrX	103332713	103332714	102587641
106263724	chrX	106263724	106263725	105506940
119995576	chrX	119995576	119995577	119129539
129973959	chrX	129973959	129973960	129107935
146710915	chrX	146710915	146710916	145792433
150293559	chrX	150293559	150293560	149461792
31079925	chrX	31079925	31079926	31098042
62476441	chrX	62476441	62476442	61695911
155641677	chrX	155641677	155641678	154871338
155641633	chrX	155641633	155641634	154871294
155641598	chrX	155641598	155641599	154871259
73128232	chrX	73128232	73128233	72348071
73128258	chrX	73128258	73128259	72348097
57998178	chrX	57998178	57998179	58024612
89127377	chrX	89127377	89127378	88382378
58011892	chrX	58011892	58011893	58038326
131157011	chrX	131157011	131157012	130290985
66511872	chrX	66511872	66511873	65731714
62498956	chrX	62498956	62498957	61718426
73850498	chrX	73850498	73850499	73070333
80399212	chrX	80399212	80399213	79654711
12820080	chrX	12820080	12820081	12838199
55342418	chrX	55342418	55342419	55368851
58108451	chrX	58108451	58108452	58134885
58375052	chrX	58375052	58375053	58401485
65855134	chrX	65855134	65855135	65074976
58394146	chrX	58394146	58394147	58420579
30771831	chrX	30771831	30771832	30789948
57030832	chrX	57030832	57030833	57057265
62783023	chrX	62783023	62783024	62002493
62911252	chrX	62911252	62911253	62130722
62945544	chrX	62945544	62945545	62165014
63950065	chrX	63950065	63950066	63169945
48581933	chrX	48581933	48581934	48440321
55377611	chrX	55377611	55377612	55404044
72239545	chrX	72239545	72239546	71459395
117969973	chrX	117969973	117969974	117103936
16087226	chrX	16087226	16087227	16105349
58192638	chrX	58192638	58192639	58219072
71155040	chrX	71155040	71155041	70374890
106173109	chrX	106173109	106173110	105417102
108072101	chrX	108072101	108072102	107315331
132819970	chrX	132819970	132819971	131953998
155641447	chrX	155641447	155641448	154871108
11119738	chrX	11119738	11119739	11137858
15045774	chrX	15045774	15045775	15063896
55909412	chrX	55909412	55909413	55935845
58079820	chrX	58079820	58079821	58106254
58107231	chrX	58107231	58107232	58133665
58132454	chrX	58132454	58132455	58158888
58374999	chrX	58374999	58375000	58401432
58467586	chrX	58467586	58467587	58494019
62961222	chrX	62961222	62961223	62180692
78092414	chrX	78092414	78092415	77347911
122589477	chrX	122589477	122589478	121723330
80216307	chrX	80216307	80216308	79471806
133984173	chrX	133984173	133984174	133118200
15336807	chrX	15336807	15336808	15354929
20058134	chrX	20058134	20058135	20076252
29522105	chrX	29522105	29522106	29540222
58224021	chrX	58224021	58224022	58250455
62681066	chrX	62681066	62681067	61900536
63015268	chrX	63015268	63015269	62234738
63634118	chrX	63634118	63634119	62853998
121800560	chrX	121800560	121800561	120934413
139225456	chrX	139225456	139225457	138307618
150063046	chrX	150063046	150063047	149231277
152632350	chrX	152632350	152632351	151800804
155215731	chrX	155215731	155215732	154444008
17302123	chrX	17302123	17302124	17320246
35953366	chrX	35953366	35953367	35971483
39688488	chrX	39688488	39688489	39547742
44960632	chrX	44960632	44960633	44819877
50505485	chrX	50505485	50505486	50248485
56731079	chrX	56731079	56731080	56757512
58101735	chrX	58101735	58101736	58128169
58120704	chrX	58120704	58120705	58147138
58223403	chrX	58223403	58223404	58249837
58255936	chrX	58255936	58255937	58282370
58393757	chrX	58393757	58393758	58420190
88183284	chrX	88183284	88183285	87438285
93298961	chrX	93298961	93298962	92553960
133984184	chrX	133984184	133984185	133118211
145393855	chrX	145393855	145393856	144475373
17348025	chrX	17348025	17348026	17366148
58212983	chrX	58212983	58212984	58239417
58223609	chrX	58223609	58223610	58250043
58394203	chrX	58394203	58394204	58420636
123218584	chrX	123218584	123218585	122352435
133984175	chrX	133984175	133984176	133118202
136878102	chrX	136878102	136878103	135960261
137792321	chrX	137792321	137792322	136874480
8187599	chrX	8187599	8187600	8155640
9199566	chrX	9199566	9199567	9167607
30865207	chrX	30865207	30865208	30883324
55674021	chrX	55674021	55674022	55700454
57055845	chrX	57055845	57055846	57082278
58038180	chrX	58038180	58038181	58064614
58211036	chrX	58211036	58211037	58237470
58363105	chrX	58363105	58363106	58389538
62632668	chrX	62632668	62632669	61852138
64788015	chrX	64788015	64788016	64007895
64807777	chrX	64807777	64807778	64027657
72274408	chrX	72274408	72274409	71494258
73447984	chrX	73447984	73447985	72667820
81106917	chrX	81106917	81106918	80362416
86002662	chrX	86002662	86002663	85257666
145213679	chrX	145213679	145213680	144295199
151400464	chrX	151400464	151400465	150568936
18647491	chrX	18647491	18647492	18665611
32257043	chrX	32257043	32257044	32275160
47321743	chrX	47321743	47321744	47181142
48490533	chrX	48490533	48490534	48348921
58016114	chrX	58016114	58016115	58042548
58182793	chrX	58182793	58182794	58209227
58182964	chrX	58182964	58182965	58209398
58228300	chrX	58228300	58228301	58254734
62708411	chrX	62708411	62708412	61927881
63118848	chrX	63118848	63118849	62338318
67250485	chrX	67250485	67250486	66470327
78957739	chrX	78957739	78957740	78213236
102022738	chrX	102022738	102022739	101277711
119995674	chrX	119995674	119995675	119129637
120000942	chrX	120000942	120000943	119134899
131046836	chrX	131046836	131046837	130180810
133984180	chrX	133984180	133984181	133118207
134138967	chrX	134138967	134138968	133272997
138605668	chrX	138605668	138605669	137687829
147394392	chrX	147394392	147394393	146475910
154362310	chrX	154362310	154362311	153590678
83998080	chrX	83998080	83998081	83253088
145829184	chrX	145829184	145829185	144910702
22081481	chrX	22081481	22081482	22099599
49230298	chrX	49230298	49230299	49086760
51802671	chrX	51802671	51802672	51545767
52994836	chrX	52994836	52994837	53024015
54289959	chrX	54289959	54289960	54316392
55067825	chrX	55067825	55067826	55094258
56508295	chrX	56508295	56508296	56534728
56925668	chrX	56925668	56925669	56952101
58011836	chrX	58011836	58011837	58038270
58144967	chrX	58144967	58144968	58171401
58167716	chrX	58167716	58167717	58194150
58414304	chrX	58414304	58414305	58440737
63057253	chrX	63057253	63057254	62276723
64604894	chrX	64604894	64604895	63824774
66524937	chrX	66524937	66524938	65744779
70505261	chrX	70505261	70505262	69725111
74270047	chrX	74270047	74270048	73489882
74926303	chrX	74926303	74926304	74146138
77036701	chrX	77036701	77036702	76257125
77190689	chrX	77190689	77190690	76411152
77742959	chrX	77742959	77742960	76998440
100785687	chrX	100785687	100785688	100040676
106359931	chrX	106359931	106359932	105603160
106863107	chrX	106863107	106863108	106106337
126553133	chrX	126553133	126553134	125687116
6129678	chrX	6129678	6129679	6047719
13752889	chrX	13752889	13752890	13771008
15143947	chrX	15143947	15143948	15162069
25969102	chrX	25969102	25969103	25987219
40090836	chrX	40090836	40090837	39950089
49234824	chrX	49234824	49234825	49091284
51421030	chrX	51421030	51421031	51163882
57267205	chrX	57267205	57267206	57293638
57841428	chrX	57841428	57841429	57867861
58003313	chrX	58003313	58003314	58029747
58015769	chrX	58015769	58015770	58042203
58106545	chrX	58106545	58106546	58132979
58129814	chrX	58129814	58129815	58156248
58213823	chrX	58213823	58213824	58240257
58233663	chrX	58233663	58233664	58260097
58255416	chrX	58255416	58255417	58281850
58255495	chrX	58255495	58255496	58281929
58357402	chrX	58357402	58357403	58383835
62869313	chrX	62869313	62869314	62088783
62987837	chrX	62987837	62987838	62207307
64894759	chrX	64894759	64894760	64114639
65240970	chrX	65240970	65240971	64460850
67543517	chrX	67543517	67543518	66763359
68822564	chrX	68822564	68822565	68042407
73128287	chrX	73128287	73128288	72348126
74259006	chrX	74259006	74259007	73478841
78105969	chrX	78105969	78105970	77361466
78105972	chrX	78105972	78105973	77361469
82156927	chrX	82156927	82156928	81412376
82556677	chrX	82556677	82556678	81812126
102152235	chrX	102152235	102152236	101407207
103557440	chrX	103557440	103557441	102812368
104256205	chrX	104256205	104256206	103500886
110915198	chrX	110915198	110915199	110158426
119274038	chrX	119274038	119274039	118408001
131046824	chrX	131046824	131046825	130180798
132413709	chrX	132413709	132413710	131547737
134918109	chrX	134918109	134918110	134052139
135031771	chrX	135031771	135031772	134165801
145089593	chrX	145089593	145089594	144171113
71809939	chrX	71809939	71809940	71029789
102718412	chrX	102718412	102718413	101973340
107471108	chrX	107471108	107471109	106714338
7927063	chrX	7927063	7927064	7895104
8688527	chrX	8688527	8688528	8656568
10118507	chrX	10118507	10118508	10086547
19889026	chrX	19889026	19889027	19907144
41421419	chrX	41421419	41421420	41280672
44342487	chrX	44342487	44342488	44201733
48581318	chrX	48581318	48581319	48439706
49068976	chrX	49068976	49068977	48926512
54289833	chrX	54289833	54289834	54316266
55801983	chrX	55801983	55801984	55828416
56910085	chrX	56910085	56910086	56936518
57056171	chrX	57056171	57056172	57082604
57982781	chrX	57982781	57982782	58009215
58089963	chrX	58089963	58089964	58116397
58100557	chrX	58100557	58100558	58126991
58135885	chrX	58135885	58135886	58162319
58187197	chrX	58187197	58187198	58213631
58328507	chrX	58328507	58328508	58354940
62946574	chrX	62946574	62946575	62166044
63066491	chrX	63066491	63066492	62285961
66329702	chrX	66329702	66329703	65549544
66587120	chrX	66587120	66587121	65806962
67195804	chrX	67195804	67195805	66415646
68684624	chrX	68684624	68684625	67904466
68695299	chrX	68695299	68695300	67915141
73128038	chrX	73128038	73128039	72347877
73431839	chrX	73431839	73431840	72651675
77143668	chrX	77143668	77143669	76364124
77331632	chrX	77331632	77331633	76552095
78929899	chrX	78929899	78929900	78185396
80486710	chrX	80486710	80486711	79742209
84275310	chrX	84275310	84275311	83530318
86046221	chrX	86046221	86046222	85301225
94471170	chrX	94471170	94471171	93726169
99939649	chrX	99939649	99939650	99194647
100812352	chrX	100812352	100812353	100067341
106863060	chrX	106863060	106863061	106106290
108001601	chrX	108001601	108001602	107244831
111682695	chrX	111682695	111682696	110925923
114626790	chrX	114626790	114626791	113861254
115660423	chrX	115660423	115660424	114894743
126233559	chrX	126233559	126233560	125367542
130109599	chrX	130109599	130109600	129243574
131456911	chrX	131456911	131456912	130590885
134807896	chrX	134807896	134807897	133941926
136908885	chrX	136908885	136908886	135991044
154373220	chrX	154373220	154373221	153601588
5899452	chrX	5899452	5899453	5817493
6022208	chrX	6022208	6022209	5940249
8783225	chrX	8783225	8783226	8751266
10223626	chrX	10223626	10223627	10191666
15334514	chrX	15334514	15334515	15352636
30607329	chrX	30607329	30607330	30625446
40582091	chrX	40582091	40582092	40441343
44917491	chrX	44917491	44917492	44776736
46210138	chrX	46210138	46210139	46069573
54760402	chrX	54760402	54760403	54786835
56889757	chrX	56889757	56889758	56916190
58115505	chrX	58115505	58115506	58141939
58247466	chrX	58247466	58247467	58273900
62696858	chrX	62696858	62696859	61916328
62906296	chrX	62906296	62906297	62125766
64053104	chrX	64053104	64053105	63272984
64085984	chrX	64085984	64085985	63305864
65018821	chrX	65018821	65018822	64238701
73128297	chrX	73128297	73128298	72348136
76643860	chrX	76643860	76643861	75864264
76681595	chrX	76681595	76681596	75901989
83504443	chrX	83504443	83504444	82759451
95122961	chrX	95122961	95122962	94377960
104408647	chrX	104408647	104408648	103653328
104972972	chrX	104972972	104972973	104217653
107447527	chrX	107447527	107447528	106690757
111519113	chrX	111519113	111519114	110762341
7089198	chrX	7089198	7089199	7007239
19889022	chrX	19889022	19889023	19907140
19908755	chrX	19908755	19908756	19926873
49041152	chrX	49041152	49041153	48898679
49876520	chrX	49876520	49876521	49641123
58040084	chrX	58040084	58040085	58066518
58396368	chrX	58396368	58396369	58422801
68499698	chrX	68499698	68499699	67719540
119880897	chrX	119880897	119880898	119014860
119992767	chrX	119992767	119992768	119126730
3277817	chrX	3277817	3277818	3195858
8773248	chrX	8773248	8773249	8741289
12211148	chrX	12211148	12211149	12229267
12373680	chrX	12373680	12373681	12391799
13152164	chrX	13152164	13152165	13170283
17121843	chrX	17121843	17121844	17139966
17690624	chrX	17690624	17690625	17708744
17981407	chrX	17981407	17981408	17999527
36985306	chrX	36985306	36985307	37003379
38617064	chrX	38617064	38617065	38476317
39906104	chrX	39906104	39906105	39765358
41710449	chrX	41710449	41710450	41569702
45859787	chrX	45859787	45859788	45719222
47509459	chrX	47509459	47509460	47368858
52984060	chrX	52984060	52984061	53013228
57985702	chrX	57985702	57985703	58012136
58118543	chrX	58118543	58118544	58144977
58128658	chrX	58128658	58128659	58155092
58181922	chrX	58181922	58181923	58208356
62501013	chrX	62501013	62501014	61720483
62708208	chrX	62708208	62708209	61927678
62875786	chrX	62875786	62875787	62095256
62888151	chrX	62888151	62888152	62107621
62927330	chrX	62927330	62927331	62146800
66030952	chrX	66030952	66030953	65250794
66281269	chrX	66281269	66281270	65501111
69158577	chrX	69158577	69158578	68378420
70496717	chrX	70496717	70496718	69716567
83936185	chrX	83936185	83936186	83191193
99940015	chrX	99940015	99940016	99195013
101347370	chrX	101347370	101347371	100602358
114500700	chrX	114500700	114500701	113735153
118115087	chrX	118115087	118115088	117249050
120001651	chrX	120001651	120001652	119135608
123245682	chrX	123245682	123245683	122379533
123981865	chrX	123981865	123981866	123115715
126166911	chrX	126166911	126166912	125300894
131887363	chrX	131887363	131887364	131021391
132820043	chrX	132820043	132820044	131954071
133410713	chrX	133410713	133410714	132544741
134144343	chrX	134144343	134144344	133278373
134533977	chrX	134533977	134533978	133668007
137080159	chrX	137080159	137080160	136162318
143437283	chrX	143437283	143437284	142525077
145167872	chrX	145167872	145167873	144249392
148913716	chrX	148913716	148913717	147995246
152452301	chrX	152452301	152452302	151620773
155191165	chrX	155191165	155191166	154419440
9051895	chrX	9051895	9051896	9019936
9765293	chrX	9765293	9765294	9733333
9785612	chrX	9785612	9785613	9753652
15956920	chrX	15956920	15956921	15975043
16939489	chrX	16939489	16939490	16957612
24294880	chrX	24294880	24294881	24312997
27706226	chrX	27706226	27706227	27724343
28416391	chrX	28416391	28416392	28434508
35038793	chrX	35038793	35038794	35056910
41696666	chrX	41696666	41696667	41555919
55562697	chrX	55562697	55562698	55589130
55636270	chrX	55636270	55636271	55662703
57559138	chrX	57559138	57559139	57585571
58010943	chrX	58010943	58010944	58037377
58137238	chrX	58137238	58137239	58163672
58195354	chrX	58195354	58195355	58221788
58201121	chrX	58201121	58201122	58227555
58226635	chrX	58226635	58226636	58253069
58357118	chrX	58357118	58357119	58383551
62846435	chrX	62846435	62846436	62065905
62959820	chrX	62959820	62959821	62179290
62961287	chrX	62961287	62961288	62180757
63011367	chrX	63011367	63011368	62230837
64898074	chrX	64898074	64898075	64117954
66107131	chrX	66107131	66107132	65326973
66330988	chrX	66330988	66330989	65550830
66342675	chrX	66342675	66342676	65562517
66994934	chrX	66994934	66994935	66214776
67817425	chrX	67817425	67817426	67037267
68488747	chrX	68488747	68488748	67708589
71368138	chrX	71368138	71368139	70587988
71615774	chrX	71615774	71615775	70835624
76303294	chrX	76303294	76303295	75523693
77143918	chrX	77143918	77143919	76364374
77503006	chrX	77503006	77503007	76758484
78017429	chrX	78017429	78017430	77272926
94886842	chrX	94886842	94886843	94141841
99940048	chrX	99940048	99940049	99195046
100396752	chrX	100396752	100396753	99651750
100736132	chrX	100736132	100736133	99991121
105821403	chrX	105821403	105821404	105065396
114162269	chrX	114162269	114162270	113405483
116943047	chrX	116943047	116943048	116077015
122808587	chrX	122808587	122808588	121942440
152016548	chrX	152016548	152016549	151185020
154355612	chrX	154355612	154355613	153583980
155217793	chrX	155217793	155217794	154446070
8685280	chrX	8685280	8685281	8653321
16843671	chrX	16843671	16843672	16861794
22485521	chrX	22485521	22485522	22503638
41344941	chrX	41344941	41344942	41204194
43661117	chrX	43661117	43661118	43520365
56940513	chrX	56940513	56940514	56966946
63032854	chrX	63032854	63032855	62252324
103546551	chrX	103546551	103546552	102801479
103663834	chrX	103663834	103663835	102918762
108851712	chrX	108851712	108851713	108094942
128038341	chrX	128038341	128038342	127172320
129106902	chrX	129106902	129106903	128240879
134681291	chrX	134681291	134681292	133815321
2841712	chrX	2841712	2841713	2759753
3343683	chrX	3343683	3343684	3261724
3343703	chrX	3343703	3343704	3261744
5907558	chrX	5907558	5907559	5825599
9636827	chrX	9636827	9636828	9604867
14036425	chrX	14036425	14036426	14054544
15194944	chrX	15194944	15194945	15213066
22384182	chrX	22384182	22384183	22402299
23318198	chrX	23318198	23318199	23336315
28702596	chrX	28702596	28702597	28720713
31658844	chrX	31658844	31658845	31676961
43644534	chrX	43644534	43644535	43503782
48576335	chrX	48576335	48576336	48434723
49061535	chrX	49061535	49061536	48919066
51334648	chrX	51334648	51334649	51077500
55405184	chrX	55405184	55405185	55431617
55688191	chrX	55688191	55688192	55714624
57163517	chrX	57163517	57163518	57189950
58019491	chrX	58019491	58019492	58045925
58023002	chrX	58023002	58023003	58049436
58031313	chrX	58031313	58031314	58057747
58054354	chrX	58054354	58054355	58080788
58159278	chrX	58159278	58159279	58185712
58177897	chrX	58177897	58177898	58204331
58252048	chrX	58252048	58252049	58278482
58337579	chrX	58337579	58337580	58364012
62847858	chrX	62847858	62847859	62067328
62852403	chrX	62852403	62852404	62071873
63033795	chrX	63033795	63033796	62253265
64130758	chrX	64130758	64130759	63350638
64620419	chrX	64620419	64620420	63840299
64664047	chrX	64664047	64664048	63883927
64814979	chrX	64814979	64814980	64034859
65620062	chrX	65620062	65620063	64839941
72554974	chrX	72554974	72554975	71774824
77494320	chrX	77494320	77494321	76749798
77907956	chrX	77907956	77907957	77163453
81316337	chrX	81316337	81316338	80571836
83504426	chrX	83504426	83504427	82759434
83504447	chrX	83504447	83504448	82759455
91115945	chrX	91115945	91115946	90370944
99192205	chrX	99192205	99192206	98447203
101291548	chrX	101291548	101291549	100546536
101334557	chrX	101334557	101334558	100589545
102021892	chrX	102021892	102021893	101276865
102970385	chrX	102970385	102970386	102225313
110346942	chrX	110346942	110346943	109590170
113517292	chrX	113517292	113517293	112760563
116962179	chrX	116962179	116962180	116096147
119618016	chrX	119618016	119618017	118751979
119994723	chrX	119994723	119994724	119128686
120001719	chrX	120001719	120001720	119135676
120014517	chrX	120014517	120014518	119148474
123514173	chrX	123514173	123514174	122648024
126552269	chrX	126552269	126552270	125686252
126552303	chrX	126552303	126552304	125686286
129655693	chrX	129655693	129655694	128789670
132219702	chrX	132219702	132219703	131353730
133986439	chrX	133986439	133986440	133120466
135688352	chrX	135688352	135688353	134822067
144722496	chrX	144722496	144722497	143804017
149641707	chrX	149641707	149641708	148723360
153007440	chrX	153007440	153007441	152175984
3526341	chrX	3526341	3526342	3444382
5648066	chrX	5648066	5648067	5566107
7808588	chrX	7808588	7808589	7776629
10697710	chrX	10697710	10697711	10665750
12373776	chrX	12373776	12373777	12391895
12477545	chrX	12477545	12477546	12495664
20268767	chrX	20268767	20268768	20286885
21658158	chrX	21658158	21658159	21676276
23908928	chrX	23908928	23908929	23927045
31299478	chrX	31299478	31299479	31317595
43881958	chrX	43881958	43881959	43741204
44961743	chrX	44961743	44961744	44820988
45773115	chrX	45773115	45773116	45632518
48800581	chrX	48800581	48800582	48658988
51804259	chrX	51804259	51804260	51547355
52125502	chrX	52125502	52125503	51868598
53272491	chrX	53272491	53272492	53301673
55228955	chrX	55228955	55228956	55255388
55660002	chrX	55660002	55660003	55686435
56604388	chrX	56604388	56604389	56630821
58136503	chrX	58136503	58136504	58162937
58139340	chrX	58139340	58139341	58165774
58149606	chrX	58149606	58149607	58176040
58194118	chrX	58194118	58194119	58220552
58256203	chrX	58256203	58256204	58282637
58432420	chrX	58432420	58432421	58458853
58436113	chrX	58436113	58436114	58462546
62527359	chrX	62527359	62527360	61746829
62583879	chrX	62583879	62583880	61803349
62856781	chrX	62856781	62856782	62076251
63005458	chrX	63005458	63005459	62224928
63096760	chrX	63096760	63096761	62316230
65898840	chrX	65898840	65898841	65118682
66309919	chrX	66309919	66309920	65529761
67199316	chrX	67199316	67199317	66419158
68421920	chrX	68421920	68421921	67641762
68499738	chrX	68499738	68499739	67719580
71129158	chrX	71129158	71129159	70349008
73768313	chrX	73768313	73768314	72988148
74286273	chrX	74286273	74286274	73506108
75167676	chrX	75167676	75167677	74387511
80512946	chrX	80512946	80512947	79768445
89393153	chrX	89393153	89393154	88648152
94808020	chrX	94808020	94808021	94063019
99940058	chrX	99940058	99940059	99195056
100930104	chrX	100930104	100930105	100185093
101551897	chrX	101551897	101551898	100806880
102087117	chrX	102087117	102087118	101342089
105821377	chrX	105821377	105821378	105065370
108084523	chrX	108084523	108084524	107327753
108438697	chrX	108438697	108438698	107681927
109728487	chrX	109728487	109728488	108971716
119273201	chrX	119273201	119273202	118407164
125170197	chrX	125170197	125170198	124304046
133046182	chrX	133046182	133046183	132180210
143293273	chrX	143293273	143293274	142381051
145846623	chrX	145846623	145846624	144928141
149853391	chrX	149853391	149853392	148982191
154785965	chrX	154785965	154785966	154014240
155187083	chrX	155187083	155187084	154415358
6694514	chrX	6694514	6694515	6612555
10328005	chrX	10328005	10328006	10296045
21658155	chrX	21658155	21658156	21676273
34827118	chrX	34827118	34827119	34845235
38663062	chrX	38663062	38663063	38522315
43881838	chrX	43881838	43881839	43741084
47249220	chrX	47249220	47249221	47108619
54287283	chrX	54287283	54287284	54313716
65036105	chrX	65036105	65036106	64255985
71252977	chrX	71252977	71252978	70472827
74611974	chrX	74611974	74611975	73831809
88700090	chrX	88700090	88700091	87955091
131841947	chrX	131841947	131841948	130975975
149377264	chrX	149377264	149377265	148458794
9352874	chrX	9352874	9352875	9320914
11419338	chrX	11419338	11419339	11437458
11664176	chrX	11664176	11664177	11682296
11760181	chrX	11760181	11760182	11778300
11770161	chrX	11770161	11770162	11788280
17854968	chrX	17854968	17854969	17873088
19184232	chrX	19184232	19184233	19202350
19513797	chrX	19513797	19513798	19531915
19514135	chrX	19514135	19514136	19532253
21838823	chrX	21838823	21838824	21856941
21984941	chrX	21984941	21984942	22003059
27863849	chrX	27863849	27863850	27881966
31464549	chrX	31464549	31464550	31482666
38580353	chrX	38580353	38580354	38439606
40314255	chrX	40314255	40314256	40173508
47281795	chrX	47281795	47281796	47141194
49142250	chrX	49142250	49142251	48998585
49210603	chrX	49210603	49210604	49067063
53000573	chrX	53000573	53000574	53029752
55009229	chrX	55009229	55009230	55035662
56572771	chrX	56572771	56572772	56599204
56648874	chrX	56648874	56648875	56675307
57045227	chrX	57045227	57045228	57071660
57910999	chrX	57910999	57911000	57937433
58002429	chrX	58002429	58002430	58028863
58139696	chrX	58139696	58139697	58166130
58459182	chrX	58459182	58459183	58485615
62823351	chrX	62823351	62823352	62042821
62940727	chrX	62940727	62940728	62160197
62966453	chrX	62966453	62966454	62185923
63714964	chrX	63714964	63714965	62934844
64140802	chrX	64140802	64140803	63360682
65408493	chrX	65408493	65408494	64628373
66436061	chrX	66436061	66436062	65655903
66456141	chrX	66456141	66456142	65675983
66525215	chrX	66525215	66525216	65745057
66525347	chrX	66525347	66525348	65745189
66697307	chrX	66697307	66697308	65917149
67543603	chrX	67543603	67543604	66763445
68175836	chrX	68175836	68175837	67395678
68755888	chrX	68755888	68755889	67975730
71053238	chrX	71053238	71053239	70273088
71250980	chrX	71250980	71250981	70470830
71871117	chrX	71871117	71871118	71090967
73127828	chrX	73127828	73127829	72347667
79023510	chrX	79023510	79023511	78279007
83345868	chrX	83345868	83345869	82600876
86002952	chrX	86002952	86002953	85257956
86315250	chrX	86315250	86315251	85570253
95326766	chrX	95326766	95326767	94581765
101360637	chrX	101360637	101360638	100615625
103534252	chrX	103534252	103534253	102789180
104253305	chrX	104253305	104253306	103497986
105527117	chrX	105527117	105527118	104771110
108834210	chrX	108834210	108834211	108077440
109554105	chrX	109554105	109554106	108797334
113967445	chrX	113967445	113967446	113210705
118206142	chrX	118206142	118206143	117340105
119669568	chrX	119669568	119669569	118803531
120001592	chrX	120001592	120001593	119135549
123261804	chrX	123261804	123261805	122395655
123714303	chrX	123714303	123714304	122848153
124434580	chrX	124434580	124434581	123568430
131523990	chrX	131523990	131523991	130657964
135425697	chrX	135425697	135425698	134559622
135659129	chrX	135659129	135659130	134792844
136585319	chrX	136585319	136585320	135667478
138029993	chrX	138029993	138029994	137112152
139423440	chrX	139423440	139423441	138505599
139933913	chrX	139933913	139933914	139016072
142010821	chrX	142010821	142010822	141098607
151108763	chrX	151108763	151108764	150277235
152602268	chrX	152602268	152602269	151770741
155086709	chrX	155086709	155086710	154314984
9820518	chrX	9820518	9820519	9788558
11112250	chrX	11112250	11112251	11130370
11664049	chrX	11664049	11664050	11682169
11854743	chrX	11854743	11854744	11872862
12046463	chrX	12046463	12046464	12064582
13482811	chrX	13482811	13482812	13500930
13952964	chrX	13952964	13952965	13971083
14414202	chrX	14414202	14414203	14432324
14567000	chrX	14567000	14567001	14585122
15848335	chrX	15848335	15848336	15866458
17068993	chrX	17068993	17068994	17087116
20269449	chrX	20269449	20269450	20287567
20973080	chrX	20973080	20973081	20991198
31464828	chrX	31464828	31464829	31482945
32643676	chrX	32643676	32643677	32661793
34633384	chrX	34633384	34633385	34651501
37509662	chrX	37509662	37509663	37368915
40418678	chrX	40418678	40418679	40277930
46836462	chrX	46836462	46836463	46695897
49234116	chrX	49234116	49234117	49090575
50332929	chrX	50332929	50332930	50075928
55396885	chrX	55396885	55396886	55423318
56453652	chrX	56453652	56453653	56480085
56919250	chrX	56919250	56919251	56945683
56935837	chrX	56935837	56935838	56962270
57737179	chrX	57737179	57737180	57763612
57858696	chrX	57858696	57858697	57885129
57910997	chrX	57910997	57910998	57937431
58081319	chrX	58081319	58081320	58107753
58090253	chrX	58090253	58090254	58116687
58098643	chrX	58098643	58098644	58125077
58168708	chrX	58168708	58168709	58195142
58175759	chrX	58175759	58175760	58202193
58297009	chrX	58297009	58297010	58323442
58339627	chrX	58339627	58339628	58366060
58354932	chrX	58354932	58354933	58381365
58390358	chrX	58390358	58390359	58416791
58436122	chrX	58436122	58436123	58462555
62783544	chrX	62783544	62783545	62003014
62813995	chrX	62813995	62813996	62033465
62910863	chrX	62910863	62910864	62130333
63072345	chrX	63072345	63072346	62291815
65932364	chrX	65932364	65932365	65152206
66552459	chrX	66552459	66552460	65772301
66912517	chrX	66912517	66912518	66132359
68511273	chrX	68511273	68511274	67731115
70587875	chrX	70587875	70587876	69807725
73127774	chrX	73127774	73127775	72347613
73250238	chrX	73250238	73250239	72470074
76633318	chrX	76633318	76633319	75853723
80189021	chrX	80189021	80189022	79444520
85427664	chrX	85427664	85427665	84682669
90836932	chrX	90836932	90836933	90091931
99939481	chrX	99939481	99939482	99194479
99939731	chrX	99939731	99939732	99194729
99940071	chrX	99940071	99940072	99195069
99940093	chrX	99940093	99940094	99195091
100731267	chrX	100731267	100731268	99986255
103120718	chrX	103120718	103120719	102375646
106248211	chrX	106248211	106248212	105491427
109734023	chrX	109734023	109734024	108977252
111447389	chrX	111447389	111447390	110690617
111682503	chrX	111682503	111682504	110925731
111784920	chrX	111784920	111784921	111028148
115969966	chrX	115969966	115969967	115086299
118823205	chrX	118823205	118823206	117957168
129469436	chrX	129469436	129469437	128603413
129605950	chrX	129605950	129605951	128739927
129739220	chrX	129739220	129739221	128873196
129974468	chrX	129974468	129974469	129108444
129984998	chrX	129984998	129984999	129118974
134570612	chrX	134570612	134570613	133704642
135020020	chrX	135020020	135020021	134154050
137051533	chrX	137051533	137051534	136133692
145748067	chrX	145748067	145748068	144829585
151176983	chrX	151176983	151176984	150345455
151753272	chrX	151753272	151753273	150921744
154670880	chrX	154670880	154670881	153899154
6210844	chrX	6210844	6210845	6128885
10172524	chrX	10172524	10172525	10140564
17851822	chrX	17851822	17851823	17869942
38675794	chrX	38675794	38675795	38535048
40104753	chrX	40104753	40104754	39964006
49184285	chrX	49184285	49184286	49040738
51461819	chrX	51461819	51461820	51204671
56429579	chrX	56429579	56429580	56456012
62944960	chrX	62944960	62944961	62164430
77534731	chrX	77534731	77534732	76790210
120392153	chrX	120392153	120392154	119526008
134534008	chrX	134534008	134534009	133668038
136908791	chrX	136908791	136908792	135990950
10846656	chrX	10846656	10846657	10864775
11386189	chrX	11386189	11386190	11404309
12383535	chrX	12383535	12383536	12401654
12598494	chrX	12598494	12598495	12616613
15769399	chrX	15769399	15769400	15787522
17551763	chrX	17551763	17551764	17569884
18932204	chrX	18932204	18932205	18950322
21656697	chrX	21656697	21656698	21674815
30999854	chrX	30999854	30999855	31017971
41090926	chrX	41090926	41090927	40950179
41237626	chrX	41237626	41237627	41096879
46486033	chrX	46486033	46486034	46345468
47141212	chrX	47141212	47141213	47000611
47926628	chrX	47926628	47926629	47786027
48898930	chrX	48898930	48898931	48756207
51748109	chrX	51748109	51748110	51491205
52851424	chrX	52851424	52851425	52880461
53000579	chrX	53000579	53000580	53029758
56382552	chrX	56382552	56382553	56408985
57404785	chrX	57404785	57404786	57431218
57595461	chrX	57595461	57595462	57621894
57949489	chrX	57949489	57949490	57975923
58029622	chrX	58029622	58029623	58056056
58140189	chrX	58140189	58140190	58166623
58141894	chrX	58141894	58141895	58168328
58150621	chrX	58150621	58150622	58177055
58227810	chrX	58227810	58227811	58254244
58228087	chrX	58228087	58228088	58254521
58260136	chrX	58260136	58260137	58286570
58421355	chrX	58421355	58421356	58447788
62740873	chrX	62740873	62740874	61960343
62848752	chrX	62848752	62848753	62068222
63060948	chrX	63060948	63060949	62280418
64487916	chrX	64487916	64487917	63707796
64630786	chrX	64630786	64630787	63850666
65917952	chrX	65917952	65917953	65137794
66425928	chrX	66425928	66425929	65645770
66697498	chrX	66697498	66697499	65917340
66762246	chrX	66762246	66762247	65982088
67793191	chrX	67793191	67793192	67013033
68462520	chrX	68462520	68462521	67682362
68687122	chrX	68687122	68687123	67906964
69222056	chrX	69222056	69222057	68441899
70291162	chrX	70291162	70291163	69511012
70661337	chrX	70661337	70661338	69881187
74015915	chrX	74015915	74015916	73235750
77167425	chrX	77167425	77167426	76387890
77494399	chrX	77494399	77494400	76749877
78131486	chrX	78131486	78131487	77386983
83953733	chrX	83953733	83953734	83208741
100378726	chrX	100378726	100378727	99633724
104038503	chrX	104038503	104038504	103293066
107777705	chrX	107777705	107777706	107020935
108416091	chrX	108416091	108416092	107659321
112462301	chrX	112462301	112462302	111705529
112846080	chrX	112846080	112846081	112089308
116043623	chrX	116043623	116043624	115174876
116299636	chrX	116299636	116299637	115430773
117832876	chrX	117832876	117832877	116966839
119057121	chrX	119057121	119057122	118191084
119566670	chrX	119566670	119566671	118700633
119610928	chrX	119610928	119610929	118744891
123054358	chrX	123054358	123054359	122188211
123450390	chrX	123450390	123450391	122584241
129539862	chrX	129539862	129539863	128673839
130055266	chrX	130055266	130055267	129189241
132055012	chrX	132055012	132055013	131189040
132742213	chrX	132742213	132742214	131876241
135524999	chrX	135524999	135525000	134658924
135911102	chrX	135911102	135911103	134993261
139206385	chrX	139206385	139206386	138288547
143536183	chrX	143536183	143536184	142624020
144978228	chrX	144978228	144978229	144059748
154477077	chrX	154477077	154477078	153705417
2804634	chrX	2804634	2804635	2722675
3428992	chrX	3428992	3428993	3347033
3712105	chrX	3712105	3712106	3630146
4320368	chrX	4320368	4320369	4238409
7926398	chrX	7926398	7926399	7894439
9420937	chrX	9420937	9420938	9388977
10120565	chrX	10120565	10120566	10088605
15575773	chrX	15575773	15575774	15593896
16720830	chrX	16720830	16720831	16738953
16836592	chrX	16836592	16836593	16854715
18980704	chrX	18980704	18980705	18998822
23396233	chrX	23396233	23396234	23414350
30560876	chrX	30560876	30560877	30578993
34267618	chrX	34267618	34267619	34285735
38178309	chrX	38178309	38178310	38037562
46130894	chrX	46130894	46130895	45990329
49234104	chrX	49234104	49234105	49090563
50876628	chrX	50876628	50876629	50619628
51745773	chrX	51745773	51745774	51488869
53000635	chrX	53000635	53000636	53029814
53000788	chrX	53000788	53000789	53029967
53597006	chrX	53597006	53597007	53623966
55705306	chrX	55705306	55705307	55731739
57133602	chrX	57133602	57133603	57160035
57833273	chrX	57833273	57833274	57859706
57982701	chrX	57982701	57982702	58009135
58004812	chrX	58004812	58004813	58031246
58043366	chrX	58043366	58043367	58069800
58093821	chrX	58093821	58093822	58120255
58102658	chrX	58102658	58102659	58129092
58145942	chrX	58145942	58145943	58172376
58149645	chrX	58149645	58149646	58176079
58155224	chrX	58155224	58155225	58181658
58237320	chrX	58237320	58237321	58263754
58333607	chrX	58333607	58333608	58360040
58360511	chrX	58360511	58360512	58386944
58422831	chrX	58422831	58422832	58449264
58424677	chrX	58424677	58424678	58451110
58431208	chrX	58431208	58431209	58457641
58441923	chrX	58441923	58441924	58468356
58445794	chrX	58445794	58445795	58472227
62698983	chrX	62698983	62698984	61918453
62750707	chrX	62750707	62750708	61970177
62958269	chrX	62958269	62958270	62177739
62981373	chrX	62981373	62981374	62200843
64487860	chrX	64487860	64487861	63707740
64695580	chrX	64695580	64695581	63915460
65945668	chrX	65945668	65945669	65165510
65995144	chrX	65995144	65995145	65214986
66108109	chrX	66108109	66108110	65327951
66328953	chrX	66328953	66328954	65548795
66329013	chrX	66329013	66329014	65548855
66526725	chrX	66526725	66526726	65746567
66689726	chrX	66689726	66689727	65909568
66799318	chrX	66799318	66799319	66019160
67152964	chrX	67152964	67152965	66372806
69094658	chrX	69094658	69094659	68314501
70452902	chrX	70452902	70452903	69672752
71053204	chrX	71053204	71053205	70273054
71621859	chrX	71621859	71621860	70841709
71652158	chrX	71652158	71652159	70872008
73128101	chrX	73128101	73128102	72347940
76626169	chrX	76626169	76626170	75846578
77896373	chrX	77896373	77896374	77151870
84825008	chrX	84825008	84825009	84080015
85316464	chrX	85316464	85316465	84571470
94147457	chrX	94147457	94147458	93402456
100397353	chrX	100397353	100397354	99652351
100769230	chrX	100769230	100769231	100024219
101822402	chrX	101822402	101822403	101077375
103332516	chrX	103332516	103332517	102587444
105821030	chrX	105821030	105821031	105065023
107014973	chrX	107014973	107014974	106258203
107710999	chrX	107710999	107711000	106954229
110852380	chrX	110852380	110852381	110095608
114039263	chrX	114039263	114039264	113282440
114933513	chrX	114933513	114933514	114168076
119218222	chrX	119218222	119218223	118352185
119914329	chrX	119914329	119914330	119048292
123231241	chrX	123231241	123231242	122365092
123485745	chrX	123485745	123485746	122619596
124194448	chrX	124194448	124194449	123328298
129984940	chrX	129984940	129984941	129118916
130119190	chrX	130119190	130119191	129253165
131524236	chrX	131524236	131524237	130658210
131695110	chrX	131695110	131695111	130829138
131841759	chrX	131841759	131841760	130975787
133416603	chrX	133416603	133416604	132550631
135688250	chrX	135688250	135688251	134821965
136341539	chrX	136341539	136341540	135423698
138387194	chrX	138387194	138387195	137469353
139206395	chrX	139206395	139206396	138288557
140057421	chrX	140057421	140057422	139139580
140305153	chrX	140305153	140305154	139387318
149630154	chrX	149630154	149630155	148711835
152915851	chrX	152915851	152915852	152084395
153017448	chrX	153017448	153017449	152185992
155242714	chrX	155242714	155242715	154470995
15676844	chrX	15676844	15676845	15694967
17656883	chrX	17656883	17656884	17675003
19347190	chrX	19347190	19347191	19365308
42071822	chrX	42071822	42071823	41931075
53528783	chrX	53528783	53528784	53555747
55231062	chrX	55231062	55231063	55257495
58196614	chrX	58196614	58196615	58223048
65070058	chrX	65070058	65070059	64289938
70503579	chrX	70503579	70503580	69723429
71178301	chrX	71178301	71178302	70398151
72715003	chrX	72715003	72715004	71934851
77181930	chrX	77181930	77181931	76402393
77223379	chrX	77223379	77223380	76443842
104288536	chrX	104288536	104288537	103533217
128374388	chrX	128374388	128374389	127508366
129360362	chrX	129360362	129360363	128494339
8946348	chrX	8946348	8946349	8914389
9463587	chrX	9463587	9463588	9431627
11139145	chrX	11139145	11139146	11157265
11341808	chrX	11341808	11341809	11359928
11837700	chrX	11837700	11837701	11855819
12378362	chrX	12378362	12378363	12396481
12413539	chrX	12413539	12413540	12431658
12979287	chrX	12979287	12979288	12997406
14616188	chrX	14616188	14616189	14634310
17843225	chrX	17843225	17843226	17861345
23755979	chrX	23755979	23755980	23774096
24055631	chrX	24055631	24055632	24073748
24204444	chrX	24204444	24204445	24222561
25071565	chrX	25071565	25071566	25089682
30309665	chrX	30309665	30309666	30327782
30859264	chrX	30859264	30859265	30877381
40449988	chrX	40449988	40449989	40309240
41110323	chrX	41110323	41110324	40969576
41918038	chrX	41918038	41918039	41777291
43881854	chrX	43881854	43881855	43741100
46102810	chrX	46102810	46102811	45962245
48579054	chrX	48579054	48579055	48437442
52645285	chrX	52645285	52645286	52674335
53804012	chrX	53804012	53804013	53830510
54722948	chrX	54722948	54722949	54749381
55343171	chrX	55343171	55343172	55369604
55688926	chrX	55688926	55688927	55715359
56449641	chrX	56449641	56449642	56476074
56508217	chrX	56508217	56508218	56534650
57028128	chrX	57028128	57028129	57054561
57286568	chrX	57286568	57286569	57313001
57552098	chrX	57552098	57552099	57578531
57712316	chrX	57712316	57712317	57738749
57978014	chrX	57978014	57978015	58004448
57986019	chrX	57986019	57986020	58012453
57997038	chrX	57997038	57997039	58023472
58026405	chrX	58026405	58026406	58052839
58035865	chrX	58035865	58035866	58062299
58095408	chrX	58095408	58095409	58121842
58109307	chrX	58109307	58109308	58135741
58144201	chrX	58144201	58144202	58170635
58261454	chrX	58261454	58261455	58287888
58299426	chrX	58299426	58299427	58325859
58358129	chrX	58358129	58358130	58384562
58462563	chrX	58462563	58462564	58488996
58524428	chrX	58524428	58524429	58550861
62517808	chrX	62517808	62517809	61737278
62521808	chrX	62521808	62521809	61741278
62717582	chrX	62717582	62717583	61937052
62958224	chrX	62958224	62958225	62177694
62993558	chrX	62993558	62993559	62213028
63084755	chrX	63084755	63084756	62304225
63096952	chrX	63096952	63096953	62316422
63979280	chrX	63979280	63979281	63199160
64207393	chrX	64207393	64207394	63427273
65971309	chrX	65971309	65971310	65191151
66665268	chrX	66665268	66665269	65885110
66692421	chrX	66692421	66692422	65912263
68617553	chrX	68617553	68617554	67837395
68834331	chrX	68834331	68834332	68054174
69136759	chrX	69136759	69136760	68356602
71367640	chrX	71367640	71367641	70587490
74179211	chrX	74179211	74179212	73399046
76498824	chrX	76498824	76498825	75719233
76561797	chrX	76561797	76561798	75782203
76570926	chrX	76570926	76570927	75791315
77896274	chrX	77896274	77896275	77151771
80547956	chrX	80547956	80547957	79803455
85084885	chrX	85084885	85084886	84339891
85740590	chrX	85740590	85740591	84995595
85788256	chrX	85788256	85788257	85043261
88293742	chrX	88293742	88293743	87548743
88932239	chrX	88932239	88932240	88187240
96689705	chrX	96689705	96689706	95944704
101409669	chrX	101409669	101409670	100664657
103220733	chrX	103220733	103220734	102475661
104564895	chrX	104564895	104564896	103809576
104570021	chrX	104570021	104570022	103814702
106712212	chrX	106712212	106712213	105955442
107507615	chrX	107507615	107507616	106750845
112662677	chrX	112662677	112662678	111905905
118495200	chrX	118495200	118495201	117629163
120497872	chrX	120497872	120497873	119631727
121682127	chrX	121682127	121682128	120815980
121867793	chrX	121867793	121867794	121001646
123258665	chrX	123258665	123258666	122392516
125839572	chrX	125839572	125839573	124973554
132161790	chrX	132161790	132161791	131295818
134533504	chrX	134533504	134533505	133667534
135688429	chrX	135688429	135688430	134822144
136169204	chrX	136169204	136169205	135251363
136875637	chrX	136875637	136875638	135957796
137848478	chrX	137848478	137848479	136930637
139073842	chrX	139073842	139073843	138156004
143669433	chrX	143669433	143669434	142752509
144290765	chrX	144290765	144290766	143373892
145192207	chrX	145192207	145192208	144273727
154483727	chrX	154483727	154483728	153712066
6964100	chrX	6964100	6964101	6882141
7636191	chrX	7636191	7636192	7554232
12901390	chrX	12901390	12901391	12919509
16772411	chrX	16772411	16772412	16790534
17736311	chrX	17736311	17736312	17754431
19252810	chrX	19252810	19252811	19270928
21657869	chrX	21657869	21657870	21675987
25674905	chrX	25674905	25674906	25693022
27863961	chrX	27863961	27863962	27882078
31227234	chrX	31227234	31227235	31245351
36399745	chrX	36399745	36399746	36417860
36696018	chrX	36696018	36696019	36714091
39895539	chrX	39895539	39895540	39754793
40544450	chrX	40544450	40544451	40403702
41344350	chrX	41344350	41344351	41203603
42143475	chrX	42143475	42143476	42002728
43053369	chrX	43053369	43053370	42912618
47630340	chrX	47630340	47630341	47489739
48831042	chrX	48831042	48831043	48689452
52299217	chrX	52299217	52299218	52042361
53000873	chrX	53000873	53000874	53030052
53351493	chrX	53351493	53351494	53378401
53914543	chrX	53914543	53914544	53940973
54480853	chrX	54480853	54480854	54507286
54831653	chrX	54831653	54831654	54858086
55246071	chrX	55246071	55246072	55272504
55314266	chrX	55314266	55314267	55340699
55328114	chrX	55328114	55328115	55354547
57052740	chrX	57052740	57052741	57079173
57559425	chrX	57559425	57559426	57585858
57651318	chrX	57651318	57651319	57677751
57947402	chrX	57947402	57947403	57973836
57963225	chrX	57963225	57963226	57989659
57981105	chrX	57981105	57981106	58007539
58035216	chrX	58035216	58035217	58061650
58110684	chrX	58110684	58110685	58137118
58152916	chrX	58152916	58152917	58179350
58202156	chrX	58202156	58202157	58228590
58210576	chrX	58210576	58210577	58237010
58230027	chrX	58230027	58230028	58256461
58240405	chrX	58240405	58240406	58266839
58325404	chrX	58325404	58325405	58351837
58339509	chrX	58339509	58339510	58365942
58352787	chrX	58352787	58352788	58379220
58389517	chrX	58389517	58389518	58415950
58389932	chrX	58389932	58389933	58416365
58400827	chrX	58400827	58400828	58427260
58409688	chrX	58409688	58409689	58436121
58420951	chrX	58420951	58420952	58447384
58514048	chrX	58514048	58514049	58540481
62463990	chrX	62463990	62463991	61683460
62516993	chrX	62516993	62516994	61736463
62555816	chrX	62555816	62555817	61775286
62713754	chrX	62713754	62713755	61933224
62778444	chrX	62778444	62778445	61997914
62795701	chrX	62795701	62795702	62015171
62834338	chrX	62834338	62834339	62053808
62959518	chrX	62959518	62959519	62178988
65408556	chrX	65408556	65408557	64628436
66409267	chrX	66409267	66409268	65629109
66804210	chrX	66804210	66804211	66024052
67891971	chrX	67891971	67891972	67111813
69136683	chrX	69136683	69136684	68356526
70756114	chrX	70756114	70756115	69975964
71053349	chrX	71053349	71053350	70273199
71287774	chrX	71287774	71287775	70507624
71544618	chrX	71544618	71544619	70764468
71836350	chrX	71836350	71836351	71056200
75976796	chrX	75976796	75976797	75196631
76617569	chrX	76617569	76617570	75837972
77045541	chrX	77045541	77045542	76265966
77129734	chrX	77129734	77129735	76350153
77268568	chrX	77268568	77268569	76489031
77494379	chrX	77494379	77494380	76749857
84598220	chrX	84598220	84598221	83853228
86048219	chrX	86048219	86048220	85303223
98408963	chrX	98408963	98408964	97663961
99939352	chrX	99939352	99939353	99194350
99939356	chrX	99939356	99939357	99194354
99939424	chrX	99939424	99939425	99194422
100809446	chrX	100809446	100809447	100064435
104282108	chrX	104282108	104282109	103526789
104309335	chrX	104309335	104309336	103554016
105820414	chrX	105820414	105820415	105064407
107155931	chrX	107155931	107155932	106399161
111367060	chrX	111367060	111367061	110610288
112639133	chrX	112639133	112639134	111882361
117831089	chrX	117831089	117831090	116965052
118017990	chrX	118017990	118017991	117151953
118827553	chrX	118827553	118827554	117961516
119994910	chrX	119994910	119994911	119128873
119998281	chrX	119998281	119998282	119132244
126552252	chrX	126552252	126552253	125686235
129933547	chrX	129933547	129933548	129067523
130401270	chrX	130401270	130401271	129535244
133655308	chrX	133655308	133655309	132789336
134874316	chrX	134874316	134874317	134008346
136198864	chrX	136198864	136198865	135281023
136571322	chrX	136571322	136571323	135653481
141826176	chrX	141826176	141826177	140913962
145845861	chrX	145845861	145845862	144927379
150558958	chrX	150558958	150558959	149727411
150571114	chrX	150571114	150571115	149739564
152486926	chrX	152486926	152486927	151655398
154751609	chrX	154751609	154751610	153979884
155057737	chrX	155057737	155057738	154286012
4381639	chrX	4381639	4381640	4299680
6279912	chrX	6279912	6279913	6197953
7876094	chrX	7876094	7876095	7844135
9878523	chrX	9878523	9878524	9846563
12692017	chrX	12692017	12692018	12710136
27863876	chrX	27863876	27863877	27881993
28732110	chrX	28732110	28732111	28750227
29927651	chrX	29927651	29927652	29945768
47205964	chrX	47205964	47205965	47065363
52923774	chrX	52923774	52923775	52952965
58445428	chrX	58445428	58445429	58471861
62986163	chrX	62986163	62986164	62205633
73447193	chrX	73447193	73447194	72667029
73449539	chrX	73449539	73449540	72669375
76550458	chrX	76550458	76550459	75770851
77902687	chrX	77902687	77902688	77158184
83578830	chrX	83578830	83578831	82833838
101410275	chrX	101410275	101410276	100665263
119786551	chrX	119786551	119786552	118920514
120029559	chrX	120029559	120029560	119163524
123192650	chrX	123192650	123192651	122326502
129428853	chrX	129428853	129428854	128562830
134636939	chrX	134636939	134636940	133770969
149161357	chrX	149161357	149161358	148242887
150329503	chrX	150329503	150329504	149497751
3798821	chrX	3798821	3798822	3716862
6057283	chrX	6057283	6057284	5975324
6105047	chrX	6105047	6105048	6023088
6149157	chrX	6149157	6149158	6067198
7359097	chrX	7359097	7359098	7277138
9055224	chrX	9055224	9055225	9023265
9700749	chrX	9700749	9700750	9668789
9890620	chrX	9890620	9890621	9858660
10223175	chrX	10223175	10223176	10191215
10604989	chrX	10604989	10604990	10573029
11419243	chrX	11419243	11419244	11437363
12901507	chrX	12901507	12901508	12919626
13143356	chrX	13143356	13143357	13161475
16949171	chrX	16949171	16949172	16967294
17053869	chrX	17053869	17053870	17071992
23902842	chrX	23902842	23902843	23920959
24053849	chrX	24053849	24053850	24071966
28177401	chrX	28177401	28177402	28195518
29243065	chrX	29243065	29243066	29261182
30120802	chrX	30120802	30120803	30138919
30386332	chrX	30386332	30386333	30404449
31117576	chrX	31117576	31117577	31135693
36985149	chrX	36985149	36985150	37003222
38304230	chrX	38304230	38304231	38163483
40005997	chrX	40005997	40005998	39865250
41521174	chrX	41521174	41521175	41380427
47191821	chrX	47191821	47191822	47051220
47723136	chrX	47723136	47723137	47582535
48831044	chrX	48831044	48831045	48689454
51866418	chrX	51866418	51866419	51609514
52574667	chrX	52574667	52574668	52603679
53000861	chrX	53000861	53000862	53030040
55237338	chrX	55237338	55237339	55263771
56417384	chrX	56417384	56417385	56443817
56676732	chrX	56676732	56676733	56703165
58119735	chrX	58119735	58119736	58146169
58183149	chrX	58183149	58183150	58209583
58215724	chrX	58215724	58215725	58242158
58227743	chrX	58227743	58227744	58254177
58515404	chrX	58515404	58515405	58541837
62718560	chrX	62718560	62718561	61938030
62747636	chrX	62747636	62747637	61967106
62899827	chrX	62899827	62899828	62119297
[truncated: 29,595 more rows]

## Sheet: GSE files per brain
	H01	H02	H04
Location	GSE sets	GSE sets	GSE sets
HIP	5	4	4
cere	3	3	2
BS	3	3	3
BF	2	2	2
BN	4	4	4
cortex	18	20	22
TOTAL	35	36	37
FC	6	8	8
PC	1	2	2
OC	4	3	5
TC	6	6	6
paleo	1	1	1

## Sheet: cell summary H01, H02, H04
	H01	H01	H01	H01	H01	H01	H01			H02	H02	H02	H02	H02	H02	H02				H04	H04	H04	H04	H04	H04	H04
	total	Major Type	MT#	MT	#cells	ave Me	avepwdall			total	H02	MT#	MT	#cells	ave Me	avePWD				total		MT#	MT	#cells	ave Me	avePWD
		inh	1	PN	63	0.774575	0.209605				inh	1	PN	24	0.710884	0.332243					inh	1	PN	388	0.766771	0.214456
		inh	2	PKJ	77	0.622872	0.312594				inh	2	PKJ	21	0.611354	0.320708					inh	2	PKJ	0
		inh	3	CB	654	0.555563	0.291109				inh	3	CB	454	0.551972	0.29746					inh	3	CB	734	0.548796	0.288977
		inh	4	THM	609	0.728241	0.251378				inh	4	THM	126	0.708589	0.277859					inh	4	THM	570	0.71343	0.255465
		inh	5	SubCtx	302	0.706072	0.353532				inh	5	SubCtx	562	0.687631	0.346075					inh	5	SubCtx	372	0.726137	0.334052
		inh	6	MSN	1342	0.630238	0.310672				inh	6	MSN	1249	0.647688	0.301421					inh	6	MSN	677	0.645984	0.324195
		inh	7	Foxp2	130	0.580708	0.351472				inh	7	Foxp2	146	0.600565	0.366634					inh	7	Foxp2	140	0.59676	0.356687
		inh	8	Chd7	142	0.642121	0.334656				inh	8	Chd7	75	0.643234	0.345125					inh	8	Chd7	39	0.636398	0.351419
		inh	9	Lamp5	995	0.607684	0.335919				inh	9	Lamp5	824	0.619028	0.354323					inh	9	Lamp5	752	0.616353	0.336657
		inh	10	Sncg	683	0.649526	0.336818				inh	10	Sncg	401	0.653168	0.362114					inh	10	Sncg	392	0.640556	0.350126
		inh	11	Vip	1622	0.661237	0.331784				inh	11	Vip	1017	0.664168	0.349673					inh	11	Vip	887	0.652238	0.344041
		inh	12	Sst	1642	0.680314	0.336921				inh	12	Sst	964	0.681905	0.356279					inh	12	Sst	948	0.6835	0.344486
	9697	inh	13	Pvalb	1436	0.687045	0.319113			6976	inh	13	Pvalb	1113	0.687824	0.334256				6694	inh	13	Pvalb	795	0.69657	0.322431
		exc	14	AMY	298	0.492365	0.395151				exc	14	AMY	140	0.519212	0.457282					exc	14	AMY	263	0.500009	0.377925
		exc	15	HIP-Misc	79	0.60028	0.398363				exc	15	HIP-Misc	5	0.618481	0.431946					exc	15	HIP-Misc	90	0.581017	0.369813
		exc	16	CA	18	0.462655	0.383476				exc	16	CA	369	0.45164	0.321956					exc	16	CA	267	0.461726	0.341717
		exc	17	DG	130	0.451817	0.343414				exc	17	DG	294	0.448011	0.304618					exc	17	DG	896	0.446248	0.311852
		exc	18	L4_6	4632	0.581644	0.429089				exc	18	L4_6	3340	0.576725	0.435478					exc	18	L4_6	2557	0.593388	0.428205
	9700	exc	19	L2/3-IT	4543	0.460865	0.414758			8106	exc	19	L2/3-IT	3958	0.469175	0.428396				7181	exc	19	L2/3-IT	3108	0.475813	0.424391
		NN	20	NN	420	0.604822	0.33075				NN	20	NN	156	0.591927	0.350865					NN	20	NN	209	0.589701	0.355581
		NN	20.1	ASC	373	0.558601	0.320906				NN	20.1	ASC	186	0.568437	0.323034					NN	20.1	ASC	261	0.553658	0.317752
		NN	20.2	OPC	190	0.500099	0.318119				NN	20.2	OPC	83	0.518114	0.341981					NN	20.2	OPC	72	0.520028	0.311238
	2439	NN	20.3	ODC	1456	0.486922	0.325402			1079	NN	20.3	ODC	654	0.493515	0.334583				1559	NN	20.3	ODC	1017	0.509199	0.322191
Total	21836				21836	0.580198	0.365313		Total	16161				16161	0.575009	0.379312			Total	15434				15434	0.579483	0.359686
						ave Me	avePWD_same_cell_type								ave Me	avePWD_same_cell_type									ave Me	avePWD_same_cell_type

## Sheet: H01_cells
ID	array	GSE	Donor	Region	MR	MR#	cortex	CR#	MajorType	SubType	MT	MT#	CellClass	fCpGcounts	aveMe	GSM
2	A1	GSE200121	h1930001	CA1R-CA2R-CA3R-DGR-CA4R	HIP	5	HIP	5	Lamp5	Lamp5_2	Lamp5	9	Inhibitory/non-telencephalic neurons	800	0.58625	GSM6009177
6	A1	GSE200121	h1930001	CA1R-CA2R-CA3R-DGR-CA4R	HIP	5	HIP	5	Lamp5	Lamp5_2	Lamp5	9	Inhibitory/non-telencephalic neurons	899	0.612903	GSM6009489
9	A1	GSE200121	h1930001	CA1R-CA2R-CA3R-DGR-CA4R	HIP	5	HIP	5	Lamp5	Lamp5_2	Lamp5	9	Inhibitory/non-telencephalic neurons	834	0.58753	GSM6009445
13	A1	GSE200121	h1930001	CA1R-CA2R-CA3R-DGR-CA4R	HIP	5	HIP	5	Lamp5	Lamp5_0	Lamp5	9	Inhibitory/non-telencephalic neurons	994	0.613682	GSM6009405
16	A1	GSE200121	h1930001	CA1R-CA2R-CA3R-DGR-CA4R	HIP	5	HIP	5	Lamp5	Lamp5_1	Lamp5	9	Inhibitory/non-telencephalic neurons	887	0.615558	GSM6009380
18	A1	GSE200121	h1930001	CA1R-CA2R-CA3R-DGR-CA4R	HIP	5	HIP	5	Lamp5	Lamp5_2	Lamp5	9	Inhibitory/non-telencephalic neurons	943	0.634146	GSM6009243
21	A1	GSE200121	h1930001	CA1R-CA2R-CA3R-DGR-CA4R	HIP	5	HIP	5	Lamp5	Lamp5_2	Lamp5	9	Inhibitory/non-telencephalic neurons	792	0.622475	GSM6009612
22	A1	GSE200121	h1930001	CA1R-CA2R-CA3R-DGR-CA4R	HIP	5	HIP	5	Lamp5	Lamp5_1	Lamp5	9	Inhibitory/non-telencephalic neurons	884	0.66629	GSM6009653
23	A1	GSE200121	h1930001	CA1R-CA2R-CA3R-DGR-CA4R	HIP	5	HIP	5	Lamp5	Lamp5_3	Lamp5	9	Inhibitory/non-telencephalic neurons	851	0.623972	GSM6009092
24	A1	GSE200121	h1930001	CA1R-CA2R-CA3R-DGR-CA4R	HIP	5	HIP	5	Lamp5	Lamp5_0	Lamp5	9	Inhibitory/non-telencephalic neurons	806	0.638958	GSM6009650
27	A1	GSE200121	h1930001	CA1R-CA2R-CA3R-DGR-CA4R	HIP	5	HIP	5	Lamp5	Lamp5_1	Lamp5	9	Inhibitory/non-telencephalic neurons	981	0.653415	GSM6009706
28	A1	GSE200121	h1930001	CA1R-CA2R-CA3R-DGR-CA4R	HIP	5	HIP	5	Lamp5	Lamp5_1	Lamp5	9	Inhibitory/non-telencephalic neurons	953	0.670514	GSM6009478
31	A1	GSE200121	h1930001	CA1R-CA2R-CA3R-DGR-CA4R	HIP	5	HIP	5	Lamp5-Lhx6	Lamp5_LHX6_0	Lamp5	9	Inhibitory/non-telencephalic neurons	839	0.595948	GSM6009687
32	A1	GSE200121	h1930001	CA1R-CA2R-CA3R-DGR-CA4R	HIP	5	HIP	5	Lamp5-Lhx6	Lamp5_LHX6_0	Lamp5	9	Inhibitory/non-telencephalic neurons	964	0.630705	GSM6009310
34	A1	GSE200121	h1930001	CA1R-CA2R-CA3R-DGR-CA4R	HIP	5	HIP	5	Lamp5-Lhx6	Lamp5_LHX6_1	Lamp5	9	Inhibitory/non-telencephalic neurons	830	0.655422	GSM6009212
37	A1	GSE200121	h1930001	CA1R-CA2R-CA3R-DGR-CA4R	HIP	5	HIP	5	Lamp5-Lhx6	Lamp5_LHX6_0	Lamp5	9	Inhibitory/non-telencephalic neurons	830	0.656627	GSM6009454
38	A1	GSE200121	h1930001	CA1R-CA2R-CA3R-DGR-CA4R	HIP	5	HIP	5	Lamp5-Lhx6	Lamp5_LHX6_0	Lamp5	9	Inhibitory/non-telencephalic neurons	842	0.633413	GSM6009565
42	A1	GSE200121	h1930001	CA1R-CA2R-CA3R-DGR-CA4R	HIP	5	HIP	5	Lamp5-Lhx6	Lamp5_LHX6_0	Lamp5	9	Inhibitory/non-telencephalic neurons	859	0.623981	GSM6009276
44	A1	GSE200121	h1930001	CA1R-CA2R-CA3R-DGR-CA4R	HIP	5	HIP	5	Lamp5-Lhx6	Lamp5_LHX6_0	Lamp5	9	Inhibitory/non-telencephalic neurons	956	0.639121	GSM6009157
45	A1	GSE200121	h1930001	CA1R-CA2R-CA3R-DGR-CA4R	HIP	5	HIP	5	Lamp5-Lhx6	Lamp5_LHX6_0	Lamp5	9	Inhibitory/non-telencephalic neurons	805	0.649068	GSM6009588
48	A1	GSE200121	h1930001	CA1R-CA2R-CA3R-DGR-CA4R	HIP	5	HIP	5	Pvalb	Pvalb_0	Pvalb	13	Inhibitory/non-telencephalic neurons	930	0.624731	GSM6009375
50	A1	GSE200121	h1930001	CA1R-CA2R-CA3R-DGR-CA4R	HIP	5	HIP	5	Pvalb	Pvalb_0	Pvalb	13	Inhibitory/non-telencephalic neurons	818	0.684597	GSM6009486
51	A1	GSE200121	h1930001	CA1R-CA2R-CA3R-DGR-CA4R	HIP	5	HIP	5	Pvalb	Pvalb_0	Pvalb	13	Inhibitory/non-telencephalic neurons	1039	0.651107	GSM6009297
53	A1	GSE200121	h1930001	CA1R-CA2R-CA3R-DGR-CA4R	HIP	5	HIP	5	Pvalb	Pvalb_0	Pvalb	13	Inhibitory/non-telencephalic neurons	845	0.677515	GSM6009301
55	A1	GSE200121	h1930001	CA1R-CA2R-CA3R-DGR-CA4R	HIP	5	HIP	5	Pvalb	Pvalb_0	Pvalb	13	Inhibitory/non-telencephalic neurons	879	0.722981	GSM6009319
60	A1	GSE200121	h1930001	CA1R-CA2R-CA3R-DGR-CA4R	HIP	5	HIP	5	Pvalb	Pvalb_4	Pvalb	13	Inhibitory/non-telencephalic neurons	920	0.722826	GSM6009449
62	A1	GSE200121	h1930001	CA1R-CA2R-CA3R-DGR-CA4R	HIP	5	HIP	5	Pvalb	Pvalb_2	Pvalb	13	Inhibitory/non-telencephalic neurons	837	0.755078	GSM6009334
66	A1	GSE200121	h1930001	CA1R-CA2R-CA3R-DGR-CA4R	HIP	5	HIP	5	Pvalb	Pvalb_4	Pvalb	13	Inhibitory/non-telencephalic neurons	873	0.738832	GSM6009349
67	A1	GSE200121	h1930001	CA1R-CA2R-CA3R-DGR-CA4R	HIP	5	HIP	5	Pvalb	Pvalb_2	Pvalb	13	Inhibitory/non-telencephalic neurons	861	0.739837	GSM6009621
68	A1	GSE200121	h1930001	CA1R-CA2R-CA3R-DGR-CA4R	HIP	5	HIP	5	Pvalb	Pvalb_3	Pvalb	13	Inhibitory/non-telencephalic neurons	867	0.748558	GSM6009615
70	A1	GSE200121	h1930001	CA1R-CA2R-CA3R-DGR-CA4R	HIP	5	HIP	5	Pvalb-ChC	Pvalb_ChC_0	Pvalb	13	Inhibitory/non-telencephalic neurons	878	0.686029	GSM6009298
72	A1	GSE200121	h1930001	CA1R-CA2R-CA3R-DGR-CA4R	HIP	5	HIP	5	Sncg	Sncg_3	Sncg	10	Inhibitory/non-telencephalic neurons	842	0.55285	GSM6009619
73	A1	GSE200121	h1930001	CA1R-CA2R-CA3R-DGR-CA4R	HIP	5	HIP	5	Sncg	Sncg_3	Sncg	10	Inhibitory/non-telencephalic neurons	792	0.607323	GSM6009491
76	A1	GSE200121	h1930001	CA1R-CA2R-CA3R-DGR-CA4R	HIP	5	HIP	5	Sncg	Sncg_2	Sncg	10	Inhibitory/non-telencephalic neurons	1022	0.677104	GSM6009265
78	A1	GSE200121	h1930001	CA1R-CA2R-CA3R-DGR-CA4R	HIP	5	HIP	5	Sncg	Sncg_2	Sncg	10	Inhibitory/non-telencephalic neurons	835	0.723353	GSM6009281
81	A1	GSE200121	h1930001	CA1R-CA2R-CA3R-DGR-CA4R	HIP	5	HIP	5	Sst	Sst-Chodl	Sst	12	Inhibitory/non-telencephalic neurons	808	0.678218	GSM6009403
93	A1	GSE200121	h1930001	CA1R-CA2R-CA3R-DGR-CA4R	HIP	5	HIP	5	Sst	Sst_1	Sst	12	Inhibitory/non-telencephalic neurons	842	0.706849	GSM6009097
95	A1	GSE200121	h1930001	CA1R-CA2R-CA3R-DGR-CA4R	HIP	5	HIP	5	Sst	Sst_4	Sst	12	Inhibitory/non-telencephalic neurons	861	0.749129	GSM6009254
97	A1	GSE200121	h1930001	CA1R-CA2R-CA3R-DGR-CA4R	HIP	5	HIP	5	Sst	Sst_6	Sst	12	Inhibitory/non-telencephalic neurons	883	0.748018	GSM6009639
99	A1	GSE200121	h1930001	CA1R-CA2R-CA3R-DGR-CA4R	HIP	5	HIP	5	Sst	Sst_1	Sst	12	Inhibitory/non-telencephalic neurons	768	0.761068	GSM6009307
101	A1	GSE200121	h1930001	CA1R-CA2R-CA3R-DGR-CA4R	HIP	5	HIP	5	Sst	Sst_1	Sst	12	Inhibitory/non-telencephalic neurons	972	0.753086	GSM6009318
103	A1	GSE200121	h1930001	CA1R-CA2R-CA3R-DGR-CA4R	HIP	5	HIP	5	Sst	Sst_1	Sst	12	Inhibitory/non-telencephalic neurons	959	0.755996	GSM6009343
104	A1	GSE200121	h1930001	CA1R-CA2R-CA3R-DGR-CA4R	HIP	5	HIP	5	Sst	Sst_4	Sst	12	Inhibitory/non-telencephalic neurons	936	0.767806	GSM6009381
108	A1	GSE200121	h1930001	CA1R-CA2R-CA3R-DGR-CA4R	HIP	5	HIP	5	THM-MB	THM_MB_THM_0	THM	4	Inhibitory/non-telencephalic neurons	805	0.639752	GSM6009342
110	A1	GSE200121	h1930001	CA1R-CA2R-CA3R-DGR-CA4R	HIP	5	HIP	5	Vip	Vip_4	Vip	11	Inhibitory/non-telencephalic neurons	970	0.596907	GSM6009268
112	A1	GSE200121	h1930001	CA1R-CA2R-CA3R-DGR-CA4R	HIP	5	HIP	5	Vip	Vip_7	Vip	11	Inhibitory/non-telencephalic neurons	974	0.616872	GSM6009331
118	A1	GSE200121	h1930001	CA1R-CA2R-CA3R-DGR-CA4R	HIP	5	HIP	5	Vip	Vip_0	Vip	11	Inhibitory/non-telencephalic neurons	895	0.642458	GSM6009274
120	A1	GSE200121	h1930001	CA1R-CA2R-CA3R-DGR-CA4R	HIP	5	HIP	5	Vip	Vip_2	Vip	11	Inhibitory/non-telencephalic neurons	933	0.628081	GSM6009636
121	A1	GSE200121	h1930001	CA1R-CA2R-CA3R-DGR-CA4R	HIP	5	HIP	5	Vip	Vip_2	Vip	11	Inhibitory/non-telencephalic neurons	944	0.649364	GSM6009464
122	A1	GSE200121	h1930001	CA1R-CA2R-CA3R-DGR-CA4R	HIP	5	HIP	5	Vip	Vip_1	Vip	11	Inhibitory/non-telencephalic neurons	885	0.667797	GSM6009468
123	A1	GSE200121	h1930001	CA1R-CA2R-CA3R-DGR-CA4R	HIP	5	HIP	5	Vip	Vip_2	Vip	11	Inhibitory/non-telencephalic neurons	829	0.668275	GSM6009321
125	A1	GSE200121	h1930001	CA1R-CA2R-CA3R-DGR-CA4R	HIP	5	HIP	5	Vip	Vip_3	Vip	11	Inhibitory/non-telencephalic neurons	765	0.660131	GSM6009616
127	A1	GSE200121	h1930001	CA1R-CA2R-CA3R-DGR-CA4R	HIP	5	HIP	5	Vip	Vip_6	Vip	11	Inhibitory/non-telencephalic neurons	889	0.67604	GSM6009282
132	A1	GSE200121	h1930001	CA1R-CA2R-CA3R-DGR-CA4R	HIP	5	HIP	5	Vip	Vip_5	Vip	11	Inhibitory/non-telencephalic neurons	1018	0.700393	GSM6009289
138	A1	GSE200121	h1930001	CA1R-CA2R-CA3R-DGR-CA4R	HIP	5	HIP	5	Vip	Vip_4	Vip	11	Inhibitory/non-telencephalic neurons	849	0.697291	GSM6009474
144	A1	GSE200121	h1930001	CA1R-CA2R-CA3R-DGR-CA4R	HIP	5	HIP	5	Vip	Vip_4	Vip	11	Inhibitory/non-telencephalic neurons	858	0.787879	GSM6009350
145	A1	GSE200121	h1930001	CA1R-CA2R-CA3R-DGR-CA4R	HIP	5	HIP	5	ASC	ASC_3	NN	20.1	Non-neuronal Cells	824	0.566748	GSM6009402
149	A1	GSE200121	h1930001	CA1R-CA2R-CA3R-DGR-CA4R	HIP	5	HIP	5	ASC	ASC_2	NN	20.1	Non-neuronal Cells	896	0.582589	GSM6009389
152	A1	GSE200121	h1930001	CA1R-CA2R-CA3R-DGR-CA4R	HIP	5	HIP	5	ASC	ASC_0	NN	20.1	Non-neuronal Cells	845	0.612426	GSM6009700
153	A1	GSE200121	h1930001	CA1R-CA2R-CA3R-DGR-CA4R	HIP	5	HIP	5	ASC	ASC_2	NN	20.1	Non-neuronal Cells	989	0.600607	GSM6009262
155	A1	GSE200121	h1930001	CA1R-CA2R-CA3R-DGR-CA4R	HIP	5	HIP	5	EC	EC_0	DG	17	Non-neuronal Cells	1119	0.598749	GSM6009469
157	A1	GSE200121	h1930001	CA1R-CA2R-CA3R-DGR-CA4R	HIP	5	HIP	5	EC	EC_0	DG	17	Non-neuronal Cells	828	0.591787	GSM6009630
161	A1	GSE200121	h1930001	CA1R-CA2R-CA3R-DGR-CA4R	HIP	5	HIP	5	MGC	MGC_0	NN	20	Non-neuronal Cells	840	0.566667	GSM6009373
163	A1	GSE200121	h1930001	CA1R-CA2R-CA3R-DGR-CA4R	HIP	5	HIP	5	MGC	MGC_0	NN	20	Non-neuronal Cells	1468	0.604905	GSM6009271
165	A1	GSE200121	h1930001	CA1R-CA2R-CA3R-DGR-CA4R	HIP	5	HIP	5	MGC	MGC_0	NN	20	Non-neuronal Cells	895	0.648045	GSM6009426
167	A1	GSE200121	h1930001	CA1R-CA2R-CA3R-DGR-CA4R	HIP	5	HIP	5	MGC	MGC_0	NN	20	Non-neuronal Cells	935	0.652406	GSM6009419
168	A1	GSE200121	h1930001	CA1R-CA2R-CA3R-DGR-CA4R	HIP	5	HIP	5	MGC	MGC_0	NN	20	Non-neuronal Cells	844	0.616114	GSM6009411
171	A1	GSE200121	h1930001	CA1R-CA2R-CA3R-DGR-CA4R	HIP	5	HIP	5	MGC	MGC_0	NN	20	Non-neuronal Cells	2364	0.669769	GSM6009598
172	A1	GSE200121	h1930001	CA1R-CA2R-CA3R-DGR-CA4R	HIP	5	HIP	5	MGC	MGC_0	NN	20	Non-neuronal Cells	831	0.705174	GSM6009358
173	A1	GSE200121	h1930001	CA1R-CA2R-CA3R-DGR-CA4R	HIP	5	HIP	5	MGC	MGC_0	NN	20	Non-neuronal Cells	924	0.714827	GSM6009256
174	A1	GSE200121	h1930001	CA1R-CA2R-CA3R-DGR-CA4R	HIP	5	HIP	5	MGC	MGC_0	NN	20	Non-neuronal Cells	925	0.72	GSM6009430
178	A1	GSE200121	h1930001	CA1R-CA2R-CA3R-DGR-CA4R	HIP	5	HIP	5	ODC	ODC_0	NN	20.3	Non-neuronal Cells	1078	0.508813	GSM6009665
182	A1	GSE200121	h1930001	CA1R-CA2R-CA3R-DGR-CA4R	HIP	5	HIP	5	ODC	ODC_1	NN	20.3	Non-neuronal Cells	798	0.526316	GSM6009230
185	A1	GSE200121	h1930001	CA1R-CA2R-CA3R-DGR-CA4R	HIP	5	HIP	5	ODC	ODC_1	NN	20.3	Non-neuronal Cells	839	0.491657	GSM6009433
187	A1	GSE200121	h1930001	CA1R-CA2R-CA3R-DGR-CA4R	HIP	5	HIP	5	ODC	ODC_1	NN	20.3	Non-neuronal Cells	866	0.509238	GSM6009404
188	A1	GSE200121	h1930001	CA1R-CA2R-CA3R-DGR-CA4R	HIP	5	HIP	5	ODC	ODC_1	NN	20.3	Non-neuronal Cells	802	0.482544	GSM6009379
191	A1	GSE200121	h1930001	CA1R-CA2R-CA3R-DGR-CA4R	HIP	5	HIP	5	ODC	ODC_1	NN	20.3	Non-neuronal Cells	813	0.514145	GSM6009697
193	A1	GSE200121	h1930001	CA1R-CA2R-CA3R-DGR-CA4R	HIP	5	HIP	5	ODC	ODC_1	NN	20.3	Non-neuronal Cells	832	0.529647	GSM6009174
195	A1	GSE200121	h1930001	CA1R-CA2R-CA3R-DGR-CA4R	HIP	5	HIP	5	ODC	ODC_1	NN	20.3	Non-neuronal Cells	1015	0.498522	GSM6009376
196	A1	GSE200121	h1930001	CA1R-CA2R-CA3R-DGR-CA4R	HIP	5	HIP	5	ODC	ODC_1	NN	20.3	Non-neuronal Cells	988	0.530364	GSM6009214
197	A1	GSE200121	h1930001	CA1R-CA2R-CA3R-DGR-CA4R	HIP	5	HIP	5	ODC	ODC_1	NN	20.3	Non-neuronal Cells	927	0.514563	GSM6009432
198	A1	GSE200121	h1930001	CA1R-CA2R-CA3R-DGR-CA4R	HIP	5	HIP	5	ODC	ODC_1	NN	20.3	Non-neuronal Cells	867	0.50173	GSM6009335
203	A1	GSE200121	h1930001	CA1R-CA2R-CA3R-DGR-CA4R	HIP	5	HIP	5	ODC	ODC_1	NN	20.3	Non-neuronal Cells	1033	0.538238	GSM6009267
205	A1	GSE200121	h1930001	CA1R-CA2R-CA3R-DGR-CA4R	HIP	5	HIP	5	ODC	ODC_1	NN	20.3	Non-neuronal Cells	880	0.519318	GSM6009418
206	A1	GSE200121	h1930001	CA1R-CA2R-CA3R-DGR-CA4R	HIP	5	HIP	5	ODC	ODC_0	NN	20.3	Non-neuronal Cells	1053	0.512821	GSM6009241
208	A1	GSE200121	h1930001	CA1R-CA2R-CA3R-DGR-CA4R	HIP	5	HIP	5	ODC	ODC_1	NN	20.3	Non-neuronal Cells	834	0.530576	GSM6009233
209	A1	GSE200121	h1930001	CA1R-CA2R-CA3R-DGR-CA4R	HIP	5	HIP	5	ODC	ODC_1	NN	20.3	Non-neuronal Cells	825	0.556364	GSM6009429
212	A1	GSE200121	h1930001	CA1R-CA2R-CA3R-DGR-CA4R	HIP	5	HIP	5	ODC	ODC_1	NN	20.3	Non-neuronal Cells	826	0.572639	GSM6009390
213	A1	GSE200121	h1930001	CA1R-CA2R-CA3R-DGR-CA4R	HIP	5	HIP	5	ODC	ODC_1	NN	20.3	Non-neuronal Cells	835	0.554491	GSM6009423
214	A1	GSE200121	h1930001	CA1R-CA2R-CA3R-DGR-CA4R	HIP	5	HIP	5	ODC	ODC_1	NN	20.3	Non-neuronal Cells	842	0.568884	GSM6009415
217	A1	GSE200121	h1930001	CA1R-CA2R-CA3R-DGR-CA4R	HIP	5	HIP	5	PC	PC_0	NN	20	Non-neuronal Cells	1079	0.569045	GSM6009182
219	A1	GSE200121	h1930001	CA1R-CA2R-CA3R-DGR-CA4R	HIP	5	HIP	5	PC	PC_0	NN	20	Non-neuronal Cells	937	0.583778	GSM6009611
220	A1	GSE200121	h1930001	CA1R-CA2R-CA3R-DGR-CA4R	HIP	5	HIP	5	PC	PC_0	NN	20	Non-neuronal Cells	1167	0.612396	GSM6009677
221	A1	GSE200121	h1930001	CA1R-CA2R-CA3R-DGR-CA4R	HIP	5	HIP	5	PC	PC_0	NN	20	Non-neuronal Cells	1360	0.619118	GSM6009340
223	A1	GSE200121	h1930001	CA1R-CA2R-CA3R-DGR-CA4R	HIP	5	HIP	5	CA1	CA1_0	CA	16	Telencephalic excitatory neurons	901	0.417869	GSM6009309
225	A1	GSE200121	h1930001	CA1R-CA2R-CA3R-DGR-CA4R	HIP	5	HIP	5	DG	DG_0	DG	17	Telencephalic excitatory neurons	946	0.429175	GSM6009287
227	A1	GSE200121	h1930001	CA1R-CA2R-CA3R-DGR-CA4R	HIP	5	HIP	5	DG	DG_0	DG	17	Telencephalic excitatory neurons	867	0.403114	GSM6009372
232	A1	GSE200121	h1930001	CA1R-CA2R-CA3R-DGR-CA4R	HIP	5	HIP	5	DG	DG_0	DG	17	Telencephalic excitatory neurons	932	0.383047	GSM6009294
234	A1	GSE200121	h1930001	CA1R-CA2R-CA3R-DGR-CA4R	HIP	5	HIP	5	DG	DG_0	DG	17	Telencephalic excitatory neurons	886	0.430023	GSM6009441
235	A1	GSE200121	h1930001	CA1R-CA2R-CA3R-DGR-CA4R	HIP	5	HIP	5	DG	DG_0	DG	17	Telencephalic excitatory neurons	1051	0.415319	GSM6009673
236	A1	GSE200121	h1930001	CA1R-CA2R-CA3R-DGR-CA4R	HIP	5	HIP	5	DG	DG_0	DG	17	Telencephalic excitatory neurons	992	0.43246	GSM6009264
239	A1	GSE200121	h1930001	CA1R-CA2R-CA3R-DGR-CA4R	HIP	5	HIP	5	DG	DG_0	DG	17	Telencephalic excitatory neurons	910	0.41978	GSM6009482
241	A1	GSE200121	h1930001	CA1R-CA2R-CA3R-DGR-CA4R	HIP	5	HIP	5	DG	DG_0	DG	17	Telencephalic excitatory neurons	931	0.423201	GSM6009266
244	A1	GSE200121	h1930001	CA1R-CA2R-CA3R-DGR-CA4R	HIP	5	HIP	5	DG	DG_0	DG	17	Telencephalic excitatory neurons	957	0.436782	GSM6009118
246	A1	GSE200121	h1930001	CA1R-CA2R-CA3R-DGR-CA4R	HIP	5	HIP	5	DG	DG_0	DG	17	Telencephalic excitatory neurons	923	0.437703	GSM6009123
249	A1	GSE200121	h1930001	CA1R-CA2R-CA3R-DGR-CA4R	HIP	5	HIP	5	DG	DG_0	DG	17	Telencephalic excitatory neurons	950	0.435789	GSM6009709
252	A1	GSE200121	h1930001	CA1R-CA2R-CA3R-DGR-CA4R	HIP	5	HIP	5	DG	DG_0	DG	17	Telencephalic excitatory neurons	1094	0.424589	GSM6009288
254	A1	GSE200121	h1930001	CA1R-CA2R-CA3R-DGR-CA4R	HIP	5	HIP	5	DG	DG_0	DG	17	Telencephalic excitatory neurons	1015	0.452217	GSM6009126
255	A1	GSE200121	h1930001	CA1R-CA2R-CA3R-DGR-CA4R	HIP	5	HIP	5	DG	DG_0	DG	17	Telencephalic excitatory neurons	1112	0.455036	GSM6009688
256	A1	GSE200121	h1930001	CA1R-CA2R-CA3R-DGR-CA4R	HIP	5	HIP	5	DG	DG_0	DG	17	Telencephalic excitatory neurons	1044	0.429119	GSM6009131
260	A1	GSE200121	h1930001	CA1R-CA2R-CA3R-DGR-CA4R	HIP	5	HIP	5	DG	DG_0	DG	17	Telencephalic excitatory neurons	944	0.448093	GSM6009694
261	A1	GSE200121	h1930001	CA1R-CA2R-CA3R-DGR-CA4R	HIP	5	HIP	5	DG	DG_0	DG	17	Telencephalic excitatory neurons	835	0.422754	GSM6009452
263	A1	GSE200121	h1930001	CA1R-CA2R-CA3R-DGR-CA4R	HIP	5	HIP	5	DG	DG_0	DG	17	Telencephalic excitatory neurons	847	0.427391	GSM6009461
268	A1	GSE200121	h1930001	CA1R-CA2R-CA3R-DGR-CA4R	HIP	5	HIP	5	DG	DG_0	DG	17	Telencephalic excitatory neurons	927	0.440129	GSM6009450
269	A1	GSE200121	h1930001	CA1R-CA2R-CA3R-DGR-CA4R	HIP	5	HIP	5	DG	DG_0	DG	17	Telencephalic excitatory neurons	822	0.423358	GSM6009346
270	A1	GSE200121	h1930001	CA1R-CA2R-CA3R-DGR-CA4R	HIP	5	HIP	5	DG	DG_0	DG	17	Telencephalic excitatory neurons	961	0.46514	GSM6009322
273	A1	GSE200121	h1930001	CA1R-CA2R-CA3R-DGR-CA4R	HIP	5	HIP	5	DG	DG_0	DG	17	Telencephalic excitatory neurons	960	0.446875	GSM6009409
277	A1	GSE200121	h1930001	CA1R-CA2R-CA3R-DGR-CA4R	HIP	5	HIP	5	DG	DG_0	DG	17	Telencephalic excitatory neurons	838	0.448091	GSM6009647
278	A1	GSE200121	h1930001	CA1R-CA2R-CA3R-DGR-CA4R	HIP	5	HIP	5	DG	DG_0	DG	17	Telencephalic excitatory neurons	823	0.465371	GSM6009453
280	A1	GSE200121	h1930001	CA1R-CA2R-CA3R-DGR-CA4R	HIP	5	HIP	5	DG	DG_0	DG	17	Telencephalic excitatory neurons	1048	0.448473	GSM6009492
281	A1	GSE200121	h1930001	CA1R-CA2R-CA3R-DGR-CA4R	HIP	5	HIP	5	DG	DG_0	DG	17	Telencephalic excitatory neurons	819	0.47619	GSM6009328
283	A1	GSE200121	h1930001	CA1R-CA2R-CA3R-DGR-CA4R	HIP	5	HIP	5	DG	DG_0	DG	17	Telencephalic excitatory neurons	855	0.454971	GSM6009662
284	A1	GSE200121	h1930001	CA1R-CA2R-CA3R-DGR-CA4R	HIP	5	HIP	5	DG	DG_0	DG	17	Telencephalic excitatory neurons	839	0.469607	GSM6009597
285	A1	GSE200121	h1930001	CA1R-CA2R-CA3R-DGR-CA4R	HIP	5	HIP	5	DG	DG_0	DG	17	Telencephalic excitatory neurons	886	0.462754	GSM6009347
286	A1	GSE200121	h1930001	CA1R-CA2R-CA3R-DGR-CA4R	HIP	5	HIP	5	DG	DG_0	DG	17	Telencephalic excitatory neurons	794	0.487406	GSM6009366
287	A1	GSE200121	h1930001	CA1R-CA2R-CA3R-DGR-CA4R	HIP	5	HIP	5	DG	DG_0	DG	17	Telencephalic excitatory neurons	924	0.480519	GSM6009690
289	A1	GSE200121	h1930001	CA1R-CA2R-CA3R-DGR-CA4R	HIP	5	HIP	5	DG	DG_0	DG	17	Telencephalic excitatory neurons	844	0.475513	GSM6009669
290	A1	GSE200121	h1930001	CA1R-CA2R-CA3R-DGR-CA4R	HIP	5	HIP	5	DG	DG_0	DG	17	Telencephalic excitatory neurons	881	0.464813	GSM6009285
292	A1	GSE200121	h1930001	CA1R-CA2R-CA3R-DGR-CA4R	HIP	5	HIP	5	DG	DG_0	DG	17	Telencephalic excitatory neurons	895	0.465922	GSM6009458
293	A1	GSE200121	h1930001	CA1R-CA2R-CA3R-DGR-CA4R	HIP	5	HIP	5	DG	DG_0	DG	17	Telencephalic excitatory neurons	909	0.478548	GSM6009139
294	A1	GSE200121	h1930001	CA1R-CA2R-CA3R-DGR-CA4R	HIP	5	HIP	5	DG	DG_0	DG	17	Telencephalic excitatory neurons	871	0.483352	GSM6009424
295	A1	GSE200121	h1930001	CA1R-CA2R-CA3R-DGR-CA4R	HIP	5	HIP	5	DG	DG_0	DG	17	Telencephalic excitatory neurons	777	0.494852	GSM6009259
299	A1	GSE200121	h1930001	CA1R-CA2R-CA3R-DGR-CA4R	HIP	5	HIP	5	DG	DG_0	DG	17	Telencephalic excitatory neurons	1516	0.515831	GSM6009656
304	A1	GSE200121	h1930001	CA1R-CA2R-CA3R-DGR-CA4R	HIP	5	HIP	5	HIP-Misc1	HIP_Misc1_0	HIP-Misc	15	Telencephalic excitatory neurons	999	0.517518	GSM6009295
306	A1	GSE200121	h1930001	CA1R-CA2R-CA3R-DGR-CA4R	HIP	5	HIP	5	HIP-Misc1	HIP_Misc1_0	HIP-Misc	15	Telencephalic excitatory neurons	954	0.533543	GSM6009413
310	A1	GSE200121	h1930001	CA1R-CA2R-CA3R-DGR-CA4R	HIP	5	HIP	5	HIP-Misc1	HIP_Misc1_0	HIP-Misc	15	Telencephalic excitatory neurons	888	0.529279	GSM6009306
315	A1	GSE200121	h1930001	CA1R-CA2R-CA3R-DGR-CA4R	HIP	5	HIP	5	HIP-Misc1	HIP_Misc1_0	HIP-Misc	15	Telencephalic excitatory neurons	838	0.553103	GSM6009242
319	A1	GSE200121	h1930001	CA1R-CA2R-CA3R-DGR-CA4R	HIP	5	HIP	5	HIP-Misc1	HIP_Misc1_0	HIP-Misc	15	Telencephalic excitatory neurons	842	0.60095	GSM6009670
320	A1	GSE200121	h1930001	CA1R-CA2R-CA3R-DGR-CA4R	HIP	5	HIP	5	HIP-Misc2	HIP_Misc2_2	HIP-Misc	15	Telencephalic excitatory neurons	982	0.547862	GSM6009253
323	A1	GSE200121	h1930001	CA1R-CA2R-CA3R-DGR-CA4R	HIP	5	HIP	5	HIP-Misc2	HIP_Misc2_0	HIP-Misc	15	Telencephalic excitatory neurons	947	0.579725	GSM6009272
326	A1	GSE200121	h1930001	CA1R-CA2R-CA3R-DGR-CA4R	HIP	5	HIP	5	HIP-Misc2	HIP_Misc2_1	HIP-Misc	15	Telencephalic excitatory neurons	849	0.528857	GSM6009679
327	A1	GSE200121	h1930001	CA1R-CA2R-CA3R-DGR-CA4R	HIP	5	HIP	5	HIP-Misc2	HIP_Misc2_2	HIP-Misc	15	Telencephalic excitatory neurons	783	0.55811	GSM6009284
336	A1	GSE200121	h1930001	CA1R-CA2R-CA3R-DGR-CA4R	HIP	5	HIP	5	HIP-Misc2	HIP_Misc2_2	HIP-Misc	15	Telencephalic excitatory neurons	790	0.567722	GSM6009551
337	A1	GSE200121	h1930001	CA1R-CA2R-CA3R-DGR-CA4R	HIP	5	HIP	5	HIP-Misc2	HIP_Misc2_2	HIP-Misc	15	Telencephalic excitatory neurons	827	0.600967	GSM6009391
338	A1	GSE200121	h1930001	CA1R-CA2R-CA3R-DGR-CA4R	HIP	5	HIP	5	HIP-Misc2	HIP_Misc2_1	HIP-Misc	15	Telencephalic excitatory neurons	909	0.570224	GSM6009681
339	A1	GSE200121	h1930001	CA1R-CA2R-CA3R-DGR-CA4R	HIP	5	HIP	5	HIP-Misc2	HIP_Misc2_0	HIP-Misc	15	Telencephalic excitatory neurons	891	0.615039	GSM6009626
340	A1	GSE200121	h1930001	CA1R-CA2R-CA3R-DGR-CA4R	HIP	5	HIP	5	HIP-Misc2	HIP_Misc2_2	HIP-Misc	15	Telencephalic excitatory neurons	817	0.607099	GSM6009194
345	A1	GSE200121	h1930001	CA1R-CA2R-CA3R-DGR-CA4R	HIP	5	HIP	5	HIP-Misc2	HIP_Misc2_1	HIP-Misc	15	Telencephalic excitatory neurons	805	0.640994	GSM6009502
346	A1	GSE200121	h1930001	CA1R-CA2R-CA3R-DGR-CA4R	HIP	5	HIP	5	HIP-Misc2	HIP_Misc2_2	HIP-Misc	15	Telencephalic excitatory neurons	923	0.590466	GSM6009279
349	A1	GSE200121	h1930001	CA1R-CA2R-CA3R-DGR-CA4R	HIP	5	HIP	5	HIP-Misc2	HIP_Misc2_0	HIP-Misc	15	Telencephalic excitatory neurons	872	0.62328	GSM6009311
351	A1	GSE200121	h1930001	CA1R-CA2R-CA3R-DGR-CA4R	HIP	5	HIP	5	HIP-Misc2	HIP_Misc2_0	HIP-Misc	15	Telencephalic excitatory neurons	991	0.587286	GSM6009302
353	A1	GSE200121	h1930001	CA1R-CA2R-CA3R-DGR-CA4R	HIP	5	HIP	5	HIP-Misc2	HIP_Misc2_1	HIP-Misc	15	Telencephalic excitatory neurons	845	0.629586	GSM6009339
354	A1	GSE200121	h1930001	CA1R-CA2R-CA3R-DGR-CA4R	HIP	5	HIP	5	HIP-Misc2	HIP_Misc2_2	HIP-Misc	15	Telencephalic excitatory neurons	998	0.62024	GSM6009695
358	A1	GSE200121	h1930001	CA1R-CA2R-CA3R-DGR-CA4R	HIP	5	HIP	5	HIP-Misc2	HIP_Misc2_1	HIP-Misc	15	Telencephalic excitatory neurons	1007	0.624131	GSM6009699
359	A1	GSE200121	h1930001	CA1R-CA2R-CA3R-DGR-CA4R	HIP	5	HIP	5	HIP-Misc2	HIP_Misc2_2	HIP-Misc	15	Telencephalic excitatory neurons	936	0.598469	GSM6009625
360	A1	GSE200121	h1930001	CA1R-CA2R-CA3R-DGR-CA4R	HIP	5	HIP	5	HIP-Misc2	HIP_Misc2_2	HIP-Misc	15	Telencephalic excitatory neurons	962	0.655925	GSM6009623
366	A1	GSE200121	h1930001	CA1R-CA2R-CA3R-DGR-CA4R	HIP	5	HIP	5	HIP-Misc2	HIP_Misc2_0	HIP-Misc	15	Telencephalic excitatory neurons	821	0.634592	GSM6009666
367	A1	GSE200121	h1930001	CA1R-CA2R-CA3R-DGR-CA4R	HIP	5	HIP	5	HIP-Misc2	HIP_Misc2_2	HIP-Misc	15	Telencephalic excitatory neurons	817	0.633619	GSM6009320
369	A1	GSE200121	h1930001	CA1R-CA2R-CA3R-DGR-CA4R	HIP	5	HIP	5	HIP-Misc2	HIP_Misc2_1	HIP-Misc	15	Telencephalic excitatory neurons	1037	0.630665	GSM6009147
372	A1	GSE200121	h1930001	CA1R-CA2R-CA3R-DGR-CA4R	HIP	5	HIP	5	HIP-Misc2	HIP_Misc2_1	HIP-Misc	15	Telencephalic excitatory neurons	962	0.637214	GSM6009326
383	A1	GSE200121	h1930001	CA1R-CA2R-CA3R-DGR-CA4R	HIP	5	HIP	5	HIP-Misc2	HIP_Misc2_1	HIP-Misc	15	Telencephalic excitatory neurons	857	0.738623	GSM6009574
384	A1	GSE200121	h1930001	CA1R-CA2R-CA3R-DGR-CA4R	HIP	5	HIP	5	L2/3-IT	L23_IT_4	L2/3-IT	19	Telencephalic excitatory neurons	905	0.439779	GSM6009655
386	A1	GSE200121	h1930001	CA1R-CA2R-CA3R-DGR-CA4R	HIP	5	HIP	5	L2/3-IT	L23_IT_1	L2/3-IT	19	Telencephalic excitatory neurons	884	0.418552	GSM6009121
387	A1	GSE200121	h1930001	CA1R-CA2R-CA3R-DGR-CA4R	HIP	5	HIP	5	L2/3-IT	L23_IT_1	L2/3-IT	19	Telencephalic excitatory neurons	1046	0.45188	GSM6009151
388	A1	GSE200121	h1930001	CA1R-CA2R-CA3R-DGR-CA4R	HIP	5	HIP	5	L2/3-IT	L23_IT_10	L2/3-IT	19	Telencephalic excitatory neurons	880	0.502273	GSM6009352
389	A1	GSE200121	h1930001	CA1R-CA2R-CA3R-DGR-CA4R	HIP	5	HIP	5	L2/3-IT	L23_IT_12	L2/3-IT	19	Telencephalic excitatory neurons	1020	0.446078	GSM6009703
390	A1	GSE200121	h1930001	CA1R-CA2R-CA3R-DGR-CA4R	HIP	5	HIP	5	L2/3-IT	L23_IT_5	L2/3-IT	19	Telencephalic excitatory neurons	1021	0.453151	GSM6009457
393	A1	GSE200121	h1930001	CA1R-CA2R-CA3R-DGR-CA4R	HIP	5	HIP	5	L2/3-IT	L23_IT_12	L2/3-IT	19	Telencephalic excitatory neurons	980	0.459184	GSM6009152
394	A1	GSE200121	h1930001	CA1R-CA2R-CA3R-DGR-CA4R	HIP	5	HIP	5	L2/3-IT	L23_IT_1	L2/3-IT	19	Telencephalic excitatory neurons	878	0.477221	GSM6009332
395	A1	GSE200121	h1930001	CA1R-CA2R-CA3R-DGR-CA4R	HIP	5	HIP	5	L2/3-IT	L23_IT_1	L2/3-IT	19	Telencephalic excitatory neurons	893	0.486002	GSM6009592
396	A1	GSE200121	h1930001	CA1R-CA2R-CA3R-DGR-CA4R	HIP	5	HIP	5	L2/3-IT	L23_IT_1	L2/3-IT	19	Telencephalic excitatory neurons	922	0.52133	GSM6009698
397	A1	GSE200121	h1930001	CA1R-CA2R-CA3R-DGR-CA4R	HIP	5	HIP	5	L2/3-IT	L23_IT_8	L2/3-IT	19	Telencephalic excitatory neurons	904	0.516593	GSM6009260
399	A1	GSE200121	h1930001	CA1R-CA2R-CA3R-DGR-CA4R	HIP	5	HIP	5	L2/3-IT	L23_IT_12	L2/3-IT	19	Telencephalic excitatory neurons	882	0.522676	GSM6009640
401	A1	GSE200121	h1930001	CA1R-CA2R-CA3R-DGR-CA4R	HIP	5	HIP	5	L4-IT	L4_IT_3	L4_6	18	Telencephalic excitatory neurons	915	0.492896	GSM6009680
403	A1	GSE200121	h1930001	CA1R-CA2R-CA3R-DGR-CA4R	HIP	5	HIP	5	L4-IT	L4_IT_2	L4_6	18	Telencephalic excitatory neurons	839	0.529201	GSM6009557
407	A1	GSE200121	h1930001	CA1R-CA2R-CA3R-DGR-CA4R	HIP	5	HIP	5	L5/6-NP	L56_NP_1	L4_6	18	Telencephalic excitatory neurons	813	0.815498	GSM6009702
409	A1	GSE200121	h1930001	CA1R-CA2R-CA3R-DGR-CA4R	HIP	5	HIP	5	L5-ET	L5_ET_2	L4_6	18	Telencephalic excitatory neurons	865	0.53526	GSM6009130
412	A1	GSE200121	h1930001	CA1R-CA2R-CA3R-DGR-CA4R	HIP	5	HIP	5	L5-IT	L5_IT_4	L4_6	18	Telencephalic excitatory neurons	837	0.508961	GSM6009459
415	A1	GSE200121	h1930001	CA1R-CA2R-CA3R-DGR-CA4R	HIP	5	HIP	5	L5-IT	L5_IT_4	L4_6	18	Telencephalic excitatory neurons	975	0.49641	GSM6009377
416	A1	GSE200121	h1930001	CA1R-CA2R-CA3R-DGR-CA4R	HIP	5	HIP	5	L5-IT	L5_IT_3	L4_6	18	Telencephalic excitatory neurons	853	0.575615	GSM6009150
422	A1	GSE200121	h1930001	CA1R-CA2R-CA3R-DGR-CA4R	HIP	5	HIP	5	L5-IT	L5_IT_0	L4_6	18	Telencephalic excitatory neurons	892	0.737668	GSM6009292
424	A1	GSE200121	h1930001	CA1R-CA2R-CA3R-DGR-CA4R	HIP	5	HIP	5	L6b	L6b_0	L4_6	18	Telencephalic excitatory neurons	866	0.510393	GSM6009280
426	A1	GSE200121	h1930001	CA1R-CA2R-CA3R-DGR-CA4R	HIP	5	HIP	5	L6b	L6b_0	L4_6	18	Telencephalic excitatory neurons	913	0.533406	GSM6009277
428	A1	GSE200121	h1930001	CA1R-CA2R-CA3R-DGR-CA4R	HIP	5	HIP	5	L6b	L6b_0	L4_6	18	Telencephalic excitatory neurons	971	0.561277	GSM6009258
430	A1	GSE200121	h1930001	CA1R-CA2R-CA3R-DGR-CA4R	HIP	5	HIP	5	L6b	L6b_0	L4_6	18	Telencephalic excitatory neurons	860	0.615116	GSM6009263
432	A1	GSE200121	h1930001	CA1R-CA2R-CA3R-DGR-CA4R	HIP	5	HIP	5	L6b	L6b_4	L4_6	18	Telencephalic excitatory neurons	837	0.684588	GSM6009291
434	A1	GSE200121	h1930001	CA1R-CA2R-CA3R-DGR-CA4R	HIP	5	HIP	5	L6b	L6b_2	L4_6	18	Telencephalic excitatory neurons	883	0.664779	GSM6009678
435	A1	GSE200121	h1930001	CA1R-CA2R-CA3R-DGR-CA4R	HIP	5	HIP	5	L6b	L6b_2	L4_6	18	Telencephalic excitatory neurons	847	0.678867	GSM6009120
439	A1	GSE200121	h1930001	CA1R-CA2R-CA3R-DGR-CA4R	HIP	5	HIP	5	L6b	L6b_2	L4_6	18	Telencephalic excitatory neurons	855	0.753216	GSM6009308
443	A1	GSE200121	h1930001	CA1R-CA2R-CA3R-DGR-CA4R	HIP	5	HIP	5	L6-CT	L6_CT_2	L4_6	18	Telencephalic excitatory neurons	806	0.566998	GSM6009661
445	A1	GSE200121	h1930001	CA1R-CA2R-CA3R-DGR-CA4R	HIP	5	HIP	5	L6-CT	L6_CT_0	L4_6	18	Telencephalic excitatory neurons	910	0.546703	GSM6009283
447	A1	GSE200121	h1930001	CA1R-CA2R-CA3R-DGR-CA4R	HIP	5	HIP	5	L6-CT	L6_CT_2	L4_6	18	Telencephalic excitatory neurons	801	0.583021	GSM6009396
448	A1	GSE200121	h1930001	CA1R-CA2R-CA3R-DGR-CA4R	HIP	5	HIP	5	L6-CT	L6_CT_2	L4_6	18	Telencephalic excitatory neurons	903	0.528239	GSM6009313
450	A1	GSE200121	h1930001	CA1R-CA2R-CA3R-DGR-CA4R	HIP	5	HIP	5	L6-CT	L6_CT_0	L4_6	18	Telencephalic excitatory neurons	818	0.580685	GSM6009290
453	A1	GSE200121	h1930001	CA1R-CA2R-CA3R-DGR-CA4R	HIP	5	HIP	5	L6-CT	L6_CT_0	L4_6	18	Telencephalic excitatory neurons	826	0.586562	GSM6009257
456	A1	GSE200121	h1930001	CA1R-CA2R-CA3R-DGR-CA4R	HIP	5	HIP	5	L6-CT	L6_CT_0	L4_6	18	Telencephalic excitatory neurons	840	0.549405	GSM6009543
457	A1	GSE200121	h1930001	CA1R-CA2R-CA3R-DGR-CA4R	HIP	5	HIP	5	L6-CT	L6_CT_0	L4_6	18	Telencephalic excitatory neurons	942	0.585987	GSM6009651
458	A1	GSE200121	h1930001	CA1R-CA2R-CA3R-DGR-CA4R	HIP	5	HIP	5	L6-CT	L6_CT_0	L4_6	18	Telencephalic excitatory neurons	811	0.584464	GSM6009315
463	A1	GSE200121	h1930001	CA1R-CA2R-CA3R-DGR-CA4R	HIP	5	HIP	5	L6-CT	L6_CT_3	L4_6	18	Telencephalic excitatory neurons	958	0.578288	GSM6009235
465	A1	GSE200121	h1930001	CA1R-CA2R-CA3R-DGR-CA4R	HIP	5	HIP	5	L6-CT	L6_CT_2	L4_6	18	Telencephalic excitatory neurons	1025	0.580488	GSM6009329
466	A1	GSE200121	h1930001	CA1R-CA2R-CA3R-DGR-CA4R	HIP	5	HIP	5	L6-CT	L6_CT_4	L4_6	18	Telencephalic excitatory neurons	885	0.59661	GSM6009305
469	A1	GSE200121	h1930001	CA1R-CA2R-CA3R-DGR-CA4R	HIP	5	HIP	5	L6-CT	L6_CT_3	L4_6	18	Telencephalic excitatory neurons	874	0.6373	GSM6009550
470	A1	GSE200121	h1930001	CA1R-CA2R-CA3R-DGR-CA4R	HIP	5	HIP	5	L6-CT	L6_CT_2	L4_6	18	Telencephalic excitatory neurons	782	0.657289	GSM6009624
471	A1	GSE200121	h1930001	CA1R-CA2R-CA3R-DGR-CA4R	HIP	5	HIP	5	L6-CT	L6_CT_3	L4_6	18	Telencephalic excitatory neurons	890	0.639326	GSM6009079
474	A1	GSE200121	h1930001	CA1R-CA2R-CA3R-DGR-CA4R	HIP	5	HIP	5	L6-CT	L6_CT_3	L4_6	18	Telencephalic excitatory neurons	860	0.689535	GSM6009273
480	A1	GSE200121	h1930001	CA1R-CA2R-CA3R-DGR-CA4R	HIP	5	HIP	5	L6-IT	L6_IT_1	L4_6	18	Telencephalic excitatory neurons	829	0.501809	GSM6009605
482	A1	GSE200121	h1930001	CA1R-CA2R-CA3R-DGR-CA4R	HIP	5	HIP	5	L6-IT	L6_IT_1	L4_6	18	Telencephalic excitatory neurons	844	0.528436	GSM6009408
484	A1	GSE200121	h1930001	CA1R-CA2R-CA3R-DGR-CA4R	HIP	5	HIP	5	L6-IT	L6_IT_4	L4_6	18	Telencephalic excitatory neurons	1000	0.541	GSM6009608
485	A1	GSE200121	h1930001	CA1R-CA2R-CA3R-DGR-CA4R	HIP	5	HIP	5	L6-IT	L6_IT_5	L4_6	18	Telencephalic excitatory neurons	808	0.584777	GSM6009122
488	A1	GSE200121	h1930001	CA1R-CA2R-CA3R-DGR-CA4R	HIP	5	HIP	5	L6-IT	L6_IT_5	L4_6	18	Telencephalic excitatory neurons	884	0.604638	GSM6009088
490	A1	GSE200121	h1930001	CA1R-CA2R-CA3R-DGR-CA4R	HIP	5	HIP	5	L6-IT-Car3	L6_IT_Car3_2	L4_6	18	Telencephalic excitatory neurons	891	0.6633	GSM6009304
492	A2	GSE234321	h1930001	CBL	cere	2			CB	CB_0	CB	3	Inhibitory/non-telencephalic neurons	1277	0.555208	GSM7462358
493	A2	GSE234321	h1930001	CBL	cere	2			CB	CB_2	CB	3	Inhibitory/non-telencephalic neurons	985	0.630457	GSM7462389
494	A2	GSE234321	h1930001	CBL	cere	2			CB	CB_0	CB	3	Inhibitory/non-telencephalic neurons	961	0.561568	GSM7462391
495	A2	GSE234321	h1930001	CBL	cere	2			CB	CB_1	CB	3	Inhibitory/non-telencephalic neurons	881	0.586833	GSM7462397
496	A2	GSE234321	h1930001	CBL	cere	2			CB	CB_0	CB	3	Inhibitory/non-telencephalic neurons	907	0.565601	GSM7462398
497	A2	GSE234321	h1930001	CBL	cere	2			CB	CB_0	CB	3	Inhibitory/non-telencephalic neurons	2670	0.541948	GSM7462406
498	A2	GSE234321	h1930001	CBL	cere	2			CB	CB_1	CB	3	Inhibitory/non-telencephalic neurons	896	0.551339	GSM7462408
499	A2	GSE234321	h1930001	CBL	cere	2			CB	CB_1	CB	3	Inhibitory/non-telencephalic neurons	938	0.527719	GSM7462418
500	A2	GSE234321	h1930001	CBL	cere	2			CB	CB_0	CB	3	Inhibitory/non-telencephalic neurons	896	0.547991	GSM7462426
501	A2	GSE234321	h1930001	CBL	cere	2			CB	CB_1	CB	3	Inhibitory/non-telencephalic neurons	936	0.442308	GSM7462434
502	A2	GSE234321	h1930001	CBL	cere	2			CB	CB_0	CB	3	Inhibitory/non-telencephalic neurons	912	0.588816	GSM7462435
503	A2	GSE234321	h1930001	CBL	cere	2			CB	CB_0	CB	3	Inhibitory/non-telencephalic neurons	995	0.569849	GSM7462438
504	A2	GSE234321	h1930001	CBL	cere	2			CB	CB_0	CB	3	Inhibitory/non-telencephalic neurons	1336	0.563623	GSM7462445
505	A2	GSE234321	h1930001	CBL	cere	2			CB	CB_1	CB	3	Inhibitory/non-telencephalic neurons	862	0.561485	GSM7462488
506	A2	GSE234321	h1930001	CBL	cere	2			CB	CB_0	CB	3	Inhibitory/non-telencephalic neurons	892	0.535874	GSM7462493
507	A2	GSE234321	h1930001	CBL	cere	2			CB	CB_0	CB	3	Inhibitory/non-telencephalic neurons	1004	0.548805	GSM7462494
508	A2	GSE234321	h1930001	CBL	cere	2			CB	CB_1	CB	3	Inhibitory/non-telencephalic neurons	961	0.543184	GSM7462495
509	A2	GSE234321	h1930001	CBL	cere	2			CB	CB_1	CB	3	Inhibitory/non-telencephalic neurons	1008	0.515873	GSM7462496
510	A2	GSE234321	h1930001	CBL	cere	2			CB	CB_0	CB	3	Inhibitory/non-telencephalic neurons	1036	0.599421	GSM7462498
511	A2	GSE234321	h1930001	CBL	cere	2			CB	CB_1	CB	3	Inhibitory/non-telencephalic neurons	882	0.571429	GSM7462500
512	A2	GSE234321	h1930001	CBL	cere	2			CB	CB_0	CB	3	Inhibitory/non-telencephalic neurons	952	0.591387	GSM7462501
513	A2	GSE234321	h1930001	CBL	cere	2			CB	CB_1	CB	3	Inhibitory/non-telencephalic neurons	938	0.592751	GSM7462502
514	A2	GSE234321	h1930001	CBL	cere	2			CB	CB_0	CB	3	Inhibitory/non-telencephalic neurons	901	0.597114	GSM7462504
515	A2	GSE234321	h1930001	CBL	cere	2			CB	CB_0	CB	3	Inhibitory/non-telencephalic neurons	948	0.53903	GSM7462509
517	A2	GSE234321	h1930001	CBL	cere	2			CB	CB_1	CB	3	Inhibitory/non-telencephalic neurons	958	0.565762	GSM7462511
518	A2	GSE234321	h1930001	CBL	cere	2			CB	CB_2	CB	3	Inhibitory/non-telencephalic neurons	852	0.561033	GSM7462517
519	A2	GSE234321	h1930001	CBL	cere	2			CB	CB_1	CB	3	Inhibitory/non-telencephalic neurons	1008	0.539683	GSM7462524
520	A2	GSE234321	h1930001	CBL	cere	2			CB	CB_1	CB	3	Inhibitory/non-telencephalic neurons	958	0.573069	GSM7462526
521	A2	GSE234321	h1930001	CBL	cere	2			CB	CB_1	CB	3	Inhibitory/non-telencephalic neurons	904	0.547566	GSM7462527
522	A2	GSE234321	h1930001	CBL	cere	2			CB	CB_0	CB	3	Inhibitory/non-telencephalic neurons	995	0.561809	GSM7462531
523	A2	GSE234321	h1930001	CBL	cere	2			CB	CB_0	CB	3	Inhibitory/non-telencephalic neurons	1123	0.586821	GSM7462532
524	A2	GSE234321	h1930001	CBL	cere	2			CB	CB_1	CB	3	Inhibitory/non-telencephalic neurons	923	0.523835	GSM7462534
525	A2	GSE234321	h1930001	CBL	cere	2			CB	CB_0	CB	3	Inhibitory/non-telencephalic neurons	937	0.53682	GSM7462536
526	A2	GSE234321	h1930001	CBL	cere	2			CB	CB_0	CB	3	Inhibitory/non-telencephalic neurons	970	0.607216	GSM7462538
527	A2	GSE234321	h1930001	CBL	cere	2			CB	CB_1	CB	3	Inhibitory/non-telencephalic neurons	895	0.554097	GSM7462539
528	A2	GSE234321	h1930001	CBL	cere	2			CB	CB_0	CB	3	Inhibitory/non-telencephalic neurons	993	0.559919	GSM7462540
529	A2	GSE234321	h1930001	CBL	cere	2			CB	CB_0	CB	3	Inhibitory/non-telencephalic neurons	966	0.556936	GSM7462542
530	A2	GSE234321	h1930001	CBL	cere	2			CB	CB_1	CB	3	Inhibitory/non-telencephalic neurons	975	0.551795	GSM7462544
531	A2	GSE234321	h1930001	CBL	cere	2			CB	CB_0	CB	3	Inhibitory/non-telencephalic neurons	1045	0.569378	GSM7462548
532	A2	GSE234321	h1930001	CBL	cere	2			CB	CB_0	CB	3	Inhibitory/non-telencephalic neurons	1085	0.569278	GSM7462549
533	A2	GSE234321	h1930001	CBL	cere	2			CB	CB_0	CB	3	Inhibitory/non-telencephalic neurons	896	0.576451	GSM7462552
534	A2	GSE234321	h1930001	CBL	cere	2			CB	CB_1	CB	3	Inhibitory/non-telencephalic neurons	853	0.508792	GSM7462557
535	A2	GSE234321	h1930001	CBL	cere	2			CB	CB_1	CB	3	Inhibitory/non-telencephalic neurons	880	0.519318	GSM7462558
536	A2	GSE234321	h1930001	CBL	cere	2			CB	CB_1	CB	3	Inhibitory/non-telencephalic neurons	840	0.541667	GSM7462559
537	A2	GSE234321	h1930001	CBL	cere	2			CB	CB_1	CB	3	Inhibitory/non-telencephalic neurons	1057	0.539262	GSM7462560
538	A2	GSE234321	h1930001	CBL	cere	2			CB	CB_1	CB	3	Inhibitory/non-telencephalic neurons	1205	0.577593	GSM7462561
539	A2	GSE234321	h1930001	CBL	cere	2			CB	CB_0	CB	3	Inhibitory/non-telencephalic neurons	977	0.555783	GSM7462562
540	A2	GSE234321	h1930001	CBL	cere	2			CB	CB_1	CB	3	Inhibitory/non-telencephalic neurons	979	0.504597	GSM7462563
541	A2	GSE234321	h1930001	CBL	cere	2			CB	CB_1	CB	3	Inhibitory/non-telencephalic neurons	1028	0.534047	GSM7462565
542	A2	GSE234321	h1930001	CBL	cere	2			CB	CB_1	CB	3	Inhibitory/non-telencephalic neurons	1037	0.509161	GSM7462566
543	A2	GSE234321	h1930001	CBL	cere	2			CB	CB_1	CB	3	Inhibitory/non-telencephalic neurons	1026	0.524366	GSM7462567
544	A2	GSE234321	h1930001	CBL	cere	2			CB	CB_1	CB	3	Inhibitory/non-telencephalic neurons	1060	0.563208	GSM7462569
545	A2	GSE234321	h1930001	CBL	cere	2			CB	CB_1	CB	3	Inhibitory/non-telencephalic neurons	970	0.548454	GSM7462570
546	A2	GSE234321	h1930001	CBL	cere	2			CB	CB_0	CB	3	Inhibitory/non-telencephalic neurons	1028	0.620623	GSM7462571
547	A2	GSE234321	h1930001	CBL	cere	2			CB	CB_1	CB	3	Inhibitory/non-telencephalic neurons	983	0.549339	GSM7462576
548	A2	GSE234321	h1930001	CBL	cere	2			CB	CB_0	CB	3	Inhibitory/non-telencephalic neurons	980	0.567857	GSM7462577
549	A2	GSE234321	h1930001	CBL	cere	2			CB	CB_2	CB	3	Inhibitory/non-telencephalic neurons	901	0.579911	GSM7462578
550	A2	GSE234321	h1930001	CBL	cere	2			CB	CB_0	CB	3	Inhibitory/non-telencephalic neurons	909	0.570957	GSM7462579
551	A2	GSE234321	h1930001	CBL	cere	2			CB	CB_0	CB	3	Inhibitory/non-telencephalic neurons	1012	0.566206	GSM7462581
552	A2	GSE234321	h1930001	CBL	cere	2			CB	CB_1	CB	3	Inhibitory/non-telencephalic neurons	993	0.586103	GSM7462588
553	A2	GSE234321	h1930001	CBL	cere	2			CB	CB_1	CB	3	Inhibitory/non-telencephalic neurons	877	0.531357	GSM7462590
554	A2	GSE234321	h1930001	CBL	cere	2			CB	CB_0	CB	3	Inhibitory/non-telencephalic neurons	2835	0.581305	GSM7462596
555	A2	GSE234321	h1930001	CBL	cere	2			CB	CB_1	CB	3	Inhibitory/non-telencephalic neurons	969	0.578947	GSM7462598
556	A2	GSE234321	h1930001	CBL	cere	2			CB	CB_1	CB	3	Inhibitory/non-telencephalic neurons	1191	0.563392	GSM7462603
557	A2	GSE234321	h1930001	CBL	cere	2			CB	CB_1	CB	3	Inhibitory/non-telencephalic neurons	1203	0.534497	GSM7462607
558	A2	GSE234321	h1930001	CBL	cere	2			CB	CB_0	CB	3	Inhibitory/non-telencephalic neurons	982	0.613035	GSM7462610
559	A2	GSE234321	h1930001	CBL	cere	2			CB	CB_1	CB	3	Inhibitory/non-telencephalic neurons	952	0.511555	GSM7462618
560	A2	GSE234321	h1930001	CBL	cere	2			CB	CB_1	CB	3	Inhibitory/non-telencephalic neurons	1056	0.549242	GSM7462622
561	A2	GSE234321	h1930001	CBL	cere	2			CB	CB_0	CB	3	Inhibitory/non-telencephalic neurons	929	0.552207	GSM7462623
562	A2	GSE234321	h1930001	CBL	cere	2			CB	CB_2	CB	3	Inhibitory/non-telencephalic neurons	1042	0.615163	GSM7462628
563	A2	GSE234321	h1930001	CBL	cere	2			CB	CB_1	CB	3	Inhibitory/non-telencephalic neurons	1227	0.540342	GSM7462629
564	A2	GSE234321	h1930001	CBL	cere	2			CB	CB_1	CB	3	Inhibitory/non-telencephalic neurons	1235	0.522267	GSM7462636
565	A2	GSE234321	h1930001	CBL	cere	2			CB	CB_0	CB	3	Inhibitory/non-telencephalic neurons	1012	0.576087	GSM7462637
566	A2	GSE234321	h1930001	CBL	cere	2			CB	CB_1	CB	3	Inhibitory/non-telencephalic neurons	940	0.518085	GSM7462638
567	A2	GSE234321	h1930001	CBL	cere	2			CB	CB_1	CB	3	Inhibitory/non-telencephalic neurons	952	0.547269	GSM7462639
568	A2	GSE234321	h1930001	CBL	cere	2			CB	CB_1	CB	3	Inhibitory/non-telencephalic neurons	1096	0.531022	GSM7462641
569	A2	GSE234321	h1930001	CBL	cere	2			CB	CB_1	CB	3	Inhibitory/non-telencephalic neurons	1192	0.539709	GSM7462642
570	A2	GSE234321	h1930001	CBL	cere	2			CB	CB_0	CB	3	Inhibitory/non-telencephalic neurons	835	0.502994	GSM7462644
571	A2	GSE234321	h1930001	CBL	cere	2			CB	CB_0	CB	3	Inhibitory/non-telencephalic neurons	979	0.550562	GSM7462645
572	A2	GSE234321	h1930001	CBL	cere	2			CB	CB_2	CB	3	Inhibitory/non-telencephalic neurons	1148	0.62108	GSM7462647
573	A2	GSE234321	h1930001	CBL	cere	2			CB	CB_0	CB	3	Inhibitory/non-telencephalic neurons	1065	0.533803	GSM7462648
574	A2	GSE234321	h1930001	CBL	cere	2			CB	CB_0	CB	3	Inhibitory/non-telencephalic neurons	2267	0.568299	GSM7462650
575	A2	GSE234321	h1930001	CBL	cere	2			CB	CB_2	CB	3	Inhibitory/non-telencephalic neurons	979	0.625128	GSM7462661
576	A2	GSE234321	h1930001	CBL	cere	2			CB	CB_1	CB	3	Inhibitory/non-telencephalic neurons	972	0.530864	GSM7462664
577	A2	GSE234321	h1930001	CBL	cere	2			CB	CB_2	CB	3	Inhibitory/non-telencephalic neurons	942	0.583864	GSM7462680
578	A2	GSE234321	h1930001	CBL	cere	2			CB	CB_1	CB	3	Inhibitory/non-telencephalic neurons	850	0.561765	GSM7462693
579	A2	GSE234321	h1930001	CBL	cere	2			CB	CB_1	CB	3	Inhibitory/non-telencephalic neurons	984	0.526423	GSM7462699
580	A2	GSE234321	h1930001	CBL	cere	2			CB	CB_1	CB	3	Inhibitory/non-telencephalic neurons	3112	0.589278	GSM7462707
581	A2	GSE234321	h1930001	CBL	cere	2			CB	CB_0	CB	3	Inhibitory/non-telencephalic neurons	1735	0.5878	GSM7462708
582	A2	GSE234321	h1930001	CBL	cere	2			CB	CB_0	CB	3	Inhibitory/non-telencephalic neurons	992	0.589718	GSM7462731
583	A2	GSE234321	h1930001	CBL	cere	2			CB	CB_1	CB	3	Inhibitory/non-telencephalic neurons	956	0.57636	GSM7462734
584	A2	GSE234321	h1930001	CBL	cere	2			CB	CB_0	CB	3	Inhibitory/non-telencephalic neurons	856	0.557243	GSM7462738
585	A2	GSE234321	h1930001	CBL	cere	2			CB	CB_1	CB	3	Inhibitory/non-telencephalic neurons	909	0.525303	GSM7462744
586	A2	GSE234321	h1930001	CBL	cere	2			CB	CB_1	CB	3	Inhibitory/non-telencephalic neurons	881	0.510783	GSM7462759
587	A2	GSE234321	h1930001	CBL	cere	2			CB	CB_2	CB	3	Inhibitory/non-telencephalic neurons	890	0.61236	GSM7462761
588	A2	GSE234321	h1930001	CBL	cere	2			CB	CB_0	CB	3	Inhibitory/non-telencephalic neurons	940	0.523227	GSM7462762
589	A2	GSE234321	h1930001	CBL	cere	2			CB	CB_0	CB	3	Inhibitory/non-telencephalic neurons	935	0.489305	GSM7462763
590	A2	GSE234321	h1930001	CBL	cere	2			CB	CB_0	CB	3	Inhibitory/non-telencephalic neurons	1002	0.538922	GSM7462765
591	A2	GSE234321	h1930001	CBL	cere	2			CB	CB_1	CB	3	Inhibitory/non-telencephalic neurons	1022	0.534247	GSM7462768
592	A2	GSE234321	h1930001	CBL	cere	2			CB	CB_2	CB	3	Inhibitory/non-telencephalic neurons	982	0.633401	GSM7462770
593	A2	GSE234321	h1930001	CBL	cere	2			CB	CB_0	CB	3	Inhibitory/non-telencephalic neurons	969	0.569143	GSM7462771
594	A2	GSE234321	h1930001	CBL	cere	2			CB	CB_0	CB	3	Inhibitory/non-telencephalic neurons	889	0.579303	GSM7462772
595	A2	GSE234321	h1930001	CBL	cere	2			CB	CB_1	CB	3	Inhibitory/non-telencephalic neurons	1011	0.547972	GSM7462773
596	A2	GSE234321	h1930001	CBL	cere	2			CB	CB_0	CB	3	Inhibitory/non-telencephalic neurons	1004	0.610558	GSM7462776
597	A2	GSE234321	h1930001	CBL	cere	2			CB	CB_0	CB	3	Inhibitory/non-telencephalic neurons	909	0.573157	GSM7462780
598	A2	GSE234321	h1930001	CBL	cere	2			CB	CB_1	CB	3	Inhibitory/non-telencephalic neurons	973	0.56372	GSM7462781
599	A2	GSE234321	h1930001	CBL	cere	2			CB	CB_0	CB	3	Inhibitory/non-telencephalic neurons	986	0.558824	GSM7462791
600	A2	GSE234321	h1930001	CBL	cere	2			CB	CB_0	CB	3	Inhibitory/non-telencephalic neurons	820	0.541463	GSM7462795
601	A2	GSE234321	h1930001	CBL	cere	2			CB	CB_0	CB	3	Inhibitory/non-telencephalic neurons	1039	0.584216	GSM7462798
602	A2	GSE234321	h1930001	CBL	cere	2			CB	CB_1	CB	3	Inhibitory/non-telencephalic neurons	951	0.472135	GSM7462799
603	A2	GSE234321	h1930001	CBL	cere	2			CB	CB_0	CB	3	Inhibitory/non-telencephalic neurons	1012	0.58004	GSM7462801
604	A2	GSE234321	h1930001	CBL	cere	2			CB	CB_0	CB	3	Inhibitory/non-telencephalic neurons	879	0.593857	GSM7462803
605	A2	GSE234321	h1930001	CBL	cere	2			CB	CB_0	CB	3	Inhibitory/non-telencephalic neurons	1044	0.533525	GSM7462809
606	A2	GSE234321	h1930001	CBL	cere	2			CB	CB_1	CB	3	Inhibitory/non-telencephalic neurons	1008	0.55506	GSM7462810
607	A2	GSE234321	h1930001	CBL	cere	2			CB	CB_1	CB	3	Inhibitory/non-telencephalic neurons	1131	0.527851	GSM7462812
608	A2	GSE234321	h1930001	CBL	cere	2			CB	CB_0	CB	3	Inhibitory/non-telencephalic neurons	1014	0.547337	GSM7462815
609	A2	GSE234321	h1930001	CBL	cere	2			CB	CB_0	CB	3	Inhibitory/non-telencephalic neurons	957	0.58046	GSM7462817
610	A2	GSE234321	h1930001	CBL	cere	2			CB	CB_1	CB	3	Inhibitory/non-telencephalic neurons	920	0.566304	GSM7462818
611	A2	GSE234321	h1930001	CBL	cere	2			CB	CB_0	CB	3	Inhibitory/non-telencephalic neurons	1032	0.570252	GSM7462819
612	A2	GSE234321	h1930001	CBL	cere	2			CB	CB_0	CB	3	Inhibitory/non-telencephalic neurons	902	0.550998	GSM7462820
613	A2	GSE234321	h1930001	CBL	cere	2			CB	CB_0	CB	3	Inhibitory/non-telencephalic neurons	996	0.567269	GSM7462821
614	A2	GSE234321	h1930001	CBL	cere	2			CB	CB_1	CB	3	Inhibitory/non-telencephalic neurons	1074	0.514898	GSM7462823
615	A2	GSE234321	h1930001	CBL	cere	2			CB	CB_1	CB	3	Inhibitory/non-telencephalic neurons	943	0.515376	GSM7462824
616	A2	GSE234321	h1930001	CBL	cere	2			CB	CB_1	CB	3	Inhibitory/non-telencephalic neurons	960	0.5625	GSM7462826
617	A2	GSE234321	h1930001	CBL	cere	2			CB	CB_0	CB	3	Inhibitory/non-telencephalic neurons	948	0.592475	GSM7462831
618	A2	GSE234321	h1930001	CBL	cere	2			CB	CB_2	CB	3	Inhibitory/non-telencephalic neurons	1044	0.639368	GSM7462834
619	A2	GSE234321	h1930001	CBL	cere	2			CB	CB_1	CB	3	Inhibitory/non-telencephalic neurons	985	0.520305	GSM7462835
620	A2	GSE234321	h1930001	CBL	cere	2			CB	CB_0	CB	3	Inhibitory/non-telencephalic neurons	967	0.525336	GSM7462837
621	A2	GSE234321	h1930001	CBL	cere	2			CB	CB_0	CB	3	Inhibitory/non-telencephalic neurons	911	0.566411	GSM7462841
622	A2	GSE234321	h1930001	CBL	cere	2			CB	CB_0	CB	3	Inhibitory/non-telencephalic neurons	1049	0.600572	GSM7462847
623	A2	GSE234321	h1930001	CBL	cere	2			CB	CB_1	CB	3	Inhibitory/non-telencephalic neurons	1099	0.545041	GSM7462848
624	A2	GSE234321	h1930001	CBL	cere	2			CB	CB_2	CB	3	Inhibitory/non-telencephalic neurons	1067	0.626992	GSM7462850
625	A2	GSE234321	h1930001	CBL	cere	2			CB	CB_1	CB	3	Inhibitory/non-telencephalic neurons	957	0.553814	GSM7462851
626	A2	GSE234321	h1930001	CBL	cere	2			CB	CB_0	CB	3	Inhibitory/non-telencephalic neurons	893	0.590146	GSM7462852
627	A2	GSE234321	h1930001	CBL	cere	2			CB	CB_0	CB	3	Inhibitory/non-telencephalic neurons	1327	0.57046	GSM7462854
628	A2	GSE234321	h1930001	CBL	cere	2			CB	CB_1	CB	3	Inhibitory/non-telencephalic neurons	960	0.572917	GSM7462856
629	A2	GSE234321	h1930001	CBL	cere	2			CB	CB_1	CB	3	Inhibitory/non-telencephalic neurons	879	0.497156	GSM7462859
630	A2	GSE234321	h1930001	CBL	cere	2			CB	CB_2	CB	3	Inhibitory/non-telencephalic neurons	1008	0.553571	GSM7462860
631	A2	GSE234321	h1930001	CBL	cere	2			CB	CB_0	CB	3	Inhibitory/non-telencephalic neurons	861	0.555168	GSM7462861
632	A2	GSE234321	h1930001	CBL	cere	2			CB	CB_2	CB	3	Inhibitory/non-telencephalic neurons	1048	0.599237	GSM7462863
633	A2	GSE234321	h1930001	CBL	cere	2			CB	CB_2	CB	3	Inhibitory/non-telencephalic neurons	925	0.566486	GSM7462864
634	A2	GSE234321	h1930001	CBL	cere	2			CB	CB_0	CB	3	Inhibitory/non-telencephalic neurons	1069	0.586529	GSM7462865
635	A2	GSE234321	h1930001	CBL	cere	2			CB	CB_0	CB	3	Inhibitory/non-telencephalic neurons	943	0.583245	GSM7462866
636	A2	GSE234321	h1930001	CBL	cere	2			CB	CB_1	CB	3	Inhibitory/non-telencephalic neurons	934	0.525696	GSM7462869
637	A2	GSE234321	h1930001	CBL	cere	2			CB	CB_1	CB	3	Inhibitory/non-telencephalic neurons	1069	0.524322	GSM7462870
638	A2	GSE234321	h1930001	CBL	cere	2			CB	CB_1	CB	3	Inhibitory/non-telencephalic neurons	874	0.543478	GSM7462871
639	A2	GSE234321	h1930001	CBL	cere	2			CB	CB_1	CB	3	Inhibitory/non-telencephalic neurons	835	0.560479	GSM7462872
640	A2	GSE234321	h1930001	CBL	cere	2			CB	CB_1	CB	3	Inhibitory/non-telencephalic neurons	1020	0.509804	GSM7462875
641	A2	GSE234321	h1930001	CBL	cere	2			CB	CB_0	CB	3	Inhibitory/non-telencephalic neurons	939	0.548456	GSM7462877
642	A2	GSE234321	h1930001	CBL	cere	2			CB	CB_0	CB	3	Inhibitory/non-telencephalic neurons	924	0.574675	GSM7462879
643	A2	GSE234321	h1930001	CBL	cere	2			CB	CB_1	CB	3	Inhibitory/non-telencephalic neurons	1000	0.549	GSM7462881
644	A2	GSE234321	h1930001	CBL	cere	2			CB	CB_0	CB	3	Inhibitory/non-telencephalic neurons	1072	0.590485	GSM7462882
645	A2	GSE234321	h1930001	CBL	cere	2			CB	CB_0	CB	3	Inhibitory/non-telencephalic neurons	1069	0.565014	GSM7462885
646	A2	GSE234321	h1930001	CBL	cere	2			CB	CB_1	CB	3	Inhibitory/non-telencephalic neurons	1058	0.588847	GSM7462886
647	A2	GSE234321	h1930001	CBL	cere	2			CB	CB_1	CB	3	Inhibitory/non-telencephalic neurons	865	0.520231	GSM7462887
648	A2	GSE234321	h1930001	CBL	cere	2			CB	CB_0	CB	3	Inhibitory/non-telencephalic neurons	1045	0.544498	GSM7462890
649	A2	GSE234321	h1930001	CBL	cere	2			CB	CB_1	CB	3	Inhibitory/non-telencephalic neurons	890	0.507303	GSM7462893
650	A2	GSE234321	h1930001	CBL	cere	2			CB	CB_1	CB	3	Inhibitory/non-telencephalic neurons	918	0.54902	GSM7462894
651	A2	GSE234321	h1930001	CBL	cere	2			CB	CB_1	CB	3	Inhibitory/non-telencephalic neurons	981	0.552497	GSM7462895
652	A2	GSE234321	h1930001	CBL	cere	2			CB	CB_1	CB	3	Inhibitory/non-telencephalic neurons	898	0.5902	GSM7462897
653	A2	GSE234321	h1930001	CBL	cere	2			CB	CB_1	CB	3	Inhibitory/non-telencephalic neurons	935	0.55615	GSM7462898
654	A2	GSE234321	h1930001	CBL	cere	2			CB	CB_1	CB	3	Inhibitory/non-telencephalic neurons	1043	0.533078	GSM7462900
655	A2	GSE234321	h1930001	CBL	cere	2			CB	CB_1	CB	3	Inhibitory/non-telencephalic neurons	1089	0.539027	GSM7462902
656	A2	GSE234321	h1930001	CBL	cere	2			CB	CB_0	CB	3	Inhibitory/non-telencephalic neurons	1067	0.581068	GSM7462906
657	A2	GSE234321	h1930001	CBL	cere	2			CB	CB_0	CB	3	Inhibitory/non-telencephalic neurons	1083	0.618652	GSM7462908
658	A2	GSE234321	h1930001	CBL	cere	2			CB	CB_1	CB	3	Inhibitory/non-telencephalic neurons	945	0.525926	GSM7462910
659	A2	GSE234321	h1930001	CBL	cere	2			CB	CB_0	CB	3	Inhibitory/non-telencephalic neurons	1038	0.578035	GSM7462911
660	A2	GSE234321	h1930001	CBL	cere	2			CB	CB_1	CB	3	Inhibitory/non-telencephalic neurons	951	0.555205	GSM7462912
661	A2	GSE234321	h1930001	CBL	cere	2			CB	CB_0	CB	3	Inhibitory/non-telencephalic neurons	908	0.59141	GSM7462918
662	A2	GSE234321	h1930001	CBL	cere	2			CB	CB_0	CB	3	Inhibitory/non-telencephalic neurons	999	0.573574	GSM7462919
663	A2	GSE234321	h1930001	CBL	cere	2			CB	CB_1	CB	3	Inhibitory/non-telencephalic neurons	922	0.527115	GSM7462921
664	A2	GSE234321	h1930001	CBL	cere	2			CB	CB_0	CB	3	Inhibitory/non-telencephalic neurons	1044	0.610153	GSM7462923
665	A2	GSE234321	h1930001	CBL	cere	2			CB	CB_1	CB	3	Inhibitory/non-telencephalic neurons	930	0.507527	GSM7462931
666	A2	GSE234321	h1930001	CBL	cere	2			CB	CB_1	CB	3	Inhibitory/non-telencephalic neurons	1119	0.53798	GSM7462932
667	A2	GSE234321	h1930001	CBL	cere	2			CB	CB_0	CB	3	Inhibitory/non-telencephalic neurons	2509	0.566361	GSM7462933
668	A2	GSE234321	h1930001	CBL	cere	2			CB	CB_0	CB	3	Inhibitory/non-telencephalic neurons	1755	0.569516	GSM7462936
669	A2	GSE234321	h1930001	CBL	cere	2			CB	CB_1	CB	3	Inhibitory/non-telencephalic neurons	1124	0.533808	GSM7462938
670	A2	GSE234321	h1930001	CBL	cere	2			CB	CB_0	CB	3	Inhibitory/non-telencephalic neurons	995	0.566834	GSM7462939
671	A2	GSE234321	h1930001	CBL	cere	2			CB	CB_0	CB	3	Inhibitory/non-telencephalic neurons	1000	0.578	GSM7462940
672	A2	GSE234321	h1930001	CBL	cere	2			CB	CB_1	CB	3	Inhibitory/non-telencephalic neurons	984	0.565549	GSM7462941
673	A2	GSE234321	h1930001	CBL	cere	2			CB	CB_1	CB	3	Inhibitory/non-telencephalic neurons	1096	0.527372	GSM7462943
674	A2	GSE234321	h1930001	CBL	cere	2			CB	CB_0	CB	3	Inhibitory/non-telencephalic neurons	2747	0.545808	GSM7462945
675	A2	GSE234321	h1930001	CBL	cere	2			CB	CB_0	CB	3	Inhibitory/non-telencephalic neurons	1012	0.570652	GSM7462946
676	A2	GSE234321	h1930001	CBL	cere	2			CB	CB_2	CB	3	Inhibitory/non-telencephalic neurons	926	0.588553	GSM7462947
677	A2	GSE234321	h1930001	CBL	cere	2			CB	CB_1	CB	3	Inhibitory/non-telencephalic neurons	1098	0.551002	GSM7462951
678	A2	GSE234321	h1930001	CBL	cere	2			CB	CB_1	CB	3	Inhibitory/non-telencephalic neurons	1037	0.542912	GSM7462956
680	A2	GSE234321	h1930001	CBL	cere	2			CB	CB_1	CB	3	Inhibitory/non-telencephalic neurons	1061	0.548539	GSM7462960
681	A2	GSE234321	h1930001	CBL	cere	2			CB	CB_1	CB	3	Inhibitory/non-telencephalic neurons	906	0.533113	GSM7462963
682	A2	GSE234321	h1930001	CBL	cere	2			CB	CB_0	CB	3	Inhibitory/non-telencephalic neurons	1103	0.606528	GSM7462964
683	A2	GSE234321	h1930001	CBL	cere	2			CB	CB_1	CB	3	Inhibitory/non-telencephalic neurons	986	0.526369	GSM7462966
684	A2	GSE234321	h1930001	CBL	cere	2			CB	CB_0	CB	3	Inhibitory/non-telencephalic neurons	934	0.59743	GSM7462968
685	A2	GSE234321	h1930001	CBL	cere	2			CB	CB_1	CB	3	Inhibitory/non-telencephalic neurons	999	0.555556	GSM7462969
686	A2	GSE234321	h1930001	CBL	cere	2			CB	CB_0	CB	3	Inhibitory/non-telencephalic neurons	1050	0.551429	GSM7462973
687	A2	GSE234321	h1930001	CBL	cere	2			CB	CB_0	CB	3	Inhibitory/non-telencephalic neurons	881	0.535755	GSM7462975
688	A2	GSE234321	h1930001	CBL	cere	2			CB	CB_1	CB	3	Inhibitory/non-telencephalic neurons	1091	0.541705	GSM7462976
689	A2	GSE234321	h1930001	CBL	cere	2			CB	CB_1	CB	3	Inhibitory/non-telencephalic neurons	1100	0.554091	GSM7462977
690	A2	GSE234321	h1930001	CBL	cere	2			CB	CB_2	CB	3	Inhibitory/non-telencephalic neurons	1043	0.622244	GSM7463038
691	A2	GSE234321	h1930001	CBL	cere	2			CB	CB_0	CB	3	Inhibitory/non-telencephalic neurons	972	0.590535	GSM7462983
692	A2	GSE234321	h1930001	CBL	cere	2			CB	CB_0	CB	3	Inhibitory/non-telencephalic neurons	985	0.530964	GSM7462988
693	A2	GSE234321	h1930001	CBL	cere	2			CB	CB_0	CB	3	Inhibitory/non-telencephalic neurons	966	0.587474	GSM7462989
694	A2	GSE234321	h1930001	CBL	cere	2			CB	CB_0	CB	3	Inhibitory/non-telencephalic neurons	963	0.559709	GSM7462990
695	A2	GSE234321	h1930001	CBL	cere	2			CB	CB_0	CB	3	Inhibitory/non-telencephalic neurons	979	0.578141	GSM7462992
696	A2	GSE234321	h1930001	CBL	cere	2			CB	CB_1	CB	3	Inhibitory/non-telencephalic neurons	1110	0.574474	GSM7462995
697	A2	GSE234321	h1930001	CBL	cere	2			CB	CB_1	CB	3	Inhibitory/non-telencephalic neurons	1070	0.524299	GSM7463013
698	A2	GSE234321	h1930001	CBL	cere	2			CB	CB_0	CB	3	Inhibitory/non-telencephalic neurons	1093	0.554437	GSM7463017
699	A2	GSE234321	h1930001	CBL	cere	2			CB	CB_0	CB	3	Inhibitory/non-telencephalic neurons	979	0.547497	GSM7463019
700	A2	GSE234321	h1930001	CBL	cere	2			CB	CB_1	CB	3	Inhibitory/non-telencephalic neurons	1039	0.518768	GSM7463020
701	A2	GSE234321	h1930001	CBL	cere	2			CB	CB_0	CB	3	Inhibitory/non-telencephalic neurons	937	0.614728	GSM7463021
702	A2	GSE234321	h1930001	CBL	cere	2			CB	CB_0	CB	3	Inhibitory/non-telencephalic neurons	930	0.573118	GSM7463024
703	A2	GSE234321	h1930001	CBL	cere	2			CB	CB_0	CB	3	Inhibitory/non-telencephalic neurons	981	0.56371	GSM7463032
704	A2	GSE234321	h1930001	CBL	cere	2			CB	CB_1	CB	3	Inhibitory/non-telencephalic neurons	1281	0.529274	GSM7463322
705	A2	GSE234321	h1930001	CBL	cere	2			CB	CB_0	CB	3	Inhibitory/non-telencephalic neurons	919	0.569097	GSM7463185
706	A2	GSE234321	h1930001	CBL	cere	2			CB	CB_1	CB	3	Inhibitory/non-telencephalic neurons	1032	0.505814	GSM7463188
707	A2	GSE234321	h1930001	CBL	cere	2			CB	CB_0	CB	3	Inhibitory/non-telencephalic neurons	830	0.573494	GSM7463194
708	A2	GSE234321	h1930001	CBL	cere	2			CB	CB_1	CB	3	Inhibitory/non-telencephalic neurons	905	0.492818	GSM7463196
709	A2	GSE234321	h1930001	CBL	cere	2			CB	CB_0	CB	3	Inhibitory/non-telencephalic neurons	969	0.619195	GSM7463204
710	A2	GSE234321	h1930001	CBL	cere	2			CB	CB_0	CB	3	Inhibitory/non-telencephalic neurons	925	0.571892	GSM7463205
711	A2	GSE234321	h1930001	CBL	cere	2			CB	CB_0	CB	3	Inhibitory/non-telencephalic neurons	1102	0.593466	GSM7463206
712	A2	GSE234321	h1930001	CBL	cere	2			CB	CB_0	CB	3	Inhibitory/non-telencephalic neurons	1175	0.575035	GSM7463211
713	A2	GSE234321	h1930001	CBL	cere	2			CB	CB_1	CB	3	Inhibitory/non-telencephalic neurons	1092	0.521978	GSM7463213
714	A2	GSE234321	h1930001	CBL	cere	2			CB	CB_0	CB	3	Inhibitory/non-telencephalic neurons	1073	0.552656	GSM7463214
715	A2	GSE234321	h1930001	CBL	cere	2			CB	CB_1	CB	3	Inhibitory/non-telencephalic neurons	1201	0.553705	GSM7463215
716	A2	GSE234321	h1930001	CBL	cere	2			CB	CB_1	CB	3	Inhibitory/non-telencephalic neurons	1144	0.491259	GSM7463216
717	A2	GSE234321	h1930001	CBL	cere	2			CB	CB_0	CB	3	Inhibitory/non-telencephalic neurons	959	0.551616	GSM7463218
718	A2	GSE234321	h1930001	CBL	cere	2			CB	CB_1	CB	3	Inhibitory/non-telencephalic neurons	980	0.536735	GSM7463221
719	A2	GSE234321	h1930001	CBL	cere	2			CB	CB_1	CB	3	Inhibitory/non-telencephalic neurons	1003	0.565304	GSM7463224
720	A2	GSE234321	h1930001	CBL	cere	2			CB	CB_0	CB	3	Inhibitory/non-telencephalic neurons	1187	0.516007	GSM7463225
721	A2	GSE234321	h1930001	CBL	cere	2			CB	CB_0	CB	3	Inhibitory/non-telencephalic neurons	846	0.548463	GSM7463227
722	A2	GSE234321	h1930001	CBL	cere	2			CB	CB_1	CB	3	Inhibitory/non-telencephalic neurons	1027	0.485881	GSM7463228
723	A2	GSE234321	h1930001	CBL	cere	2			CB	CB_0	CB	3	Inhibitory/non-telencephalic neurons	1286	0.57465	GSM7463230
724	A2	GSE234321	h1930001	CBL	cere	2			CB	CB_1	CB	3	Inhibitory/non-telencephalic neurons	1212	0.542492	GSM7463231
725	A2	GSE234321	h1930001	CBL	cere	2			CB	CB_1	CB	3	Inhibitory/non-telencephalic neurons	1063	0.579492	GSM7463234
726	A2	GSE234321	h1930001	CBL	cere	2			CB	CB_1	CB	3	Inhibitory/non-telencephalic neurons	1063	0.550329	GSM7463237
727	A2	GSE234321	h1930001	CBL	cere	2			CB	CB_0	CB	3	Inhibitory/non-telencephalic neurons	1130	0.553097	GSM7463238
728	A2	GSE234321	h1930001	CBL	cere	2			CB	CB_1	CB	3	Inhibitory/non-telencephalic neurons	1121	0.549509	GSM7463241
729	A2	GSE234321	h1930001	CBL	cere	2			CB	CB_2	CB	3	Inhibitory/non-telencephalic neurons	1200	0.646667	GSM7463242
730	A2	GSE234321	h1930001	CBL	cere	2			CB	CB_0	CB	3	Inhibitory/non-telencephalic neurons	1210	0.580165	GSM7463243
731	A2	GSE234321	h1930001	CBL	cere	2			CB	CB_1	CB	3	Inhibitory/non-telencephalic neurons	1094	0.52925	GSM7463246
732	A2	GSE234321	h1930001	CBL	cere	2			CB	CB_1	CB	3	Inhibitory/non-telencephalic neurons	1254	0.541467	GSM7463248
733	A2	GSE234321	h1930001	CBL	cere	2			CB	CB_1	CB	3	Inhibitory/non-telencephalic neurons	1056	0.544508	GSM7463249
734	A2	GSE234321	h1930001	CBL	cere	2			CB	CB_1	CB	3	Inhibitory/non-telencephalic neurons	1048	0.507634	GSM7463250
735	A2	GSE234321	h1930001	CBL	cere	2			CB	CB_1	CB	3	Inhibitory/non-telencephalic neurons	1025	0.525854	GSM7463251
736	A2	GSE234321	h1930001	CBL	cere	2			CB	CB_1	CB	3	Inhibitory/non-telencephalic neurons	905	0.550276	GSM7463253
737	A2	GSE234321	h1930001	CBL	cere	2			CB	CB_2	CB	3	Inhibitory/non-telencephalic neurons	972	0.606996	GSM7463256
738	A2	GSE234321	h1930001	CBL	cere	2			CB	CB_0	CB	3	Inhibitory/non-telencephalic neurons	870	0.572414	GSM7463258
739	A2	GSE234321	h1930001	CBL	cere	2			CB	CB_0	CB	3	Inhibitory/non-telencephalic neurons	1007	0.609732	GSM7463259
740	A2	GSE234321	h1930001	CBL	cere	2			CB	CB_1	CB	3	Inhibitory/non-telencephalic neurons	966	0.504141	GSM7463264
741	A2	GSE234321	h1930001	CBL	cere	2			CB	CB_2	CB	3	Inhibitory/non-telencephalic neurons	943	0.6193	GSM7463266
742	A2	GSE234321	h1930001	CBL	cere	2			CB	CB_1	CB	3	Inhibitory/non-telencephalic neurons	880	0.560227	GSM7463270
743	A2	GSE234321	h1930001	CBL	cere	2			CB	CB_1	CB	3	Inhibitory/non-telencephalic neurons	1026	0.55848	GSM7463273
744	A2	GSE234321	h1930001	CBL	cere	2			CB	CB_1	CB	3	Inhibitory/non-telencephalic neurons	981	0.577472	GSM7463277
745	A2	GSE234321	h1930001	CBL	cere	2			CB	CB_1	CB	3	Inhibitory/non-telencephalic neurons	892	0.548767	GSM7463279
746	A2	GSE234321	h1930001	CBL	cere	2			CB	CB_1	CB	3	Inhibitory/non-telencephalic neurons	860	0.538372	GSM7463289
747	A2	GSE234321	h1930001	CBL	cere	2			CB	CB_1	CB	3	Inhibitory/non-telencephalic neurons	1010	0.556436	GSM7463291
748	A2	GSE234321	h1930001	CBL	cere	2			CB	CB_0	CB	3	Inhibitory/non-telencephalic neurons	985	0.553299	GSM7463292
749	A2	GSE234321	h1930001	CBL	cere	2			CB	CB_1	CB	3	Inhibitory/non-telencephalic neurons	1584	0.499369	GSM7463297
750	A2	GSE234321	h1930001	CBL	cere	2			CB	CB_0	CB	3	Inhibitory/non-telencephalic neurons	906	0.56181	GSM7463299
751	A2	GSE234321	h1930001	CBL	cere	2			CB	CB_0	CB	3	Inhibitory/non-telencephalic neurons	901	0.519423	GSM7463302
752	A2	GSE234321	h1930001	CBL	cere	2			CB	CB_0	CB	3	Inhibitory/non-telencephalic neurons	960	0.584375	GSM7463303
753	A2	GSE234321	h1930001	CBL	cere	2			CB	CB_1	CB	3	Inhibitory/non-telencephalic neurons	937	0.447172	GSM7463304
754	A2	GSE234321	h1930001	CBL	cere	2			CB	CB_0	CB	3	Inhibitory/non-telencephalic neurons	906	0.56181	GSM7463311
755	A2	GSE234321	h1930001	CBL	cere	2			CB	CB_1	CB	3	Inhibitory/non-telencephalic neurons	937	0.529349	GSM7463312
756	A2	GSE234321	h1930001	CBL	cere	2			CB	CB_2	CB	3	Inhibitory/non-telencephalic neurons	1089	0.579431	GSM7463534
757	A2	GSE234321	h1930001	CBL	cere	2			CB	CB_0	CB	3	Inhibitory/non-telencephalic neurons	877	0.58951	GSM7463535
758	A2	GSE234321	h1930001	CBL	cere	2			CB	CB_0	CB	3	Inhibitory/non-telencephalic neurons	877	0.54732	GSM7463552
759	A2	GSE234321	h1930001	CBL	cere	2			CB	CB_0	CB	3	Inhibitory/non-telencephalic neurons	880	0.552273	GSM7463568
760	A2	GSE234321	h1930001	CBL	cere	2			CB	CB_1	CB	3	Inhibitory/non-telencephalic neurons	940	0.542553	GSM7463883
761	A2	GSE234321	h1930001	CBL	cere	2			CB	CB_1	CB	3	Inhibitory/non-telencephalic neurons	920	0.538043	GSM7464312
762	A2	GSE234321	h1930001	CBL	cere	2			CB	CB_1	CB	3	Inhibitory/non-telencephalic neurons	2607	0.568406	GSM7464357
763	A2	GSE234321	h1930001	CBL	cere	2			CB	CB_0	CB	3	Inhibitory/non-telencephalic neurons	872	0.548165	GSM7464453
764	A2	GSE234321	h1930001	CBL	cere	2			CB	CB_2	CB	3	Inhibitory/non-telencephalic neurons	1012	0.58004	GSM7464459
765	A2	GSE234321	h1930001	CBL	cere	2			CB	CB_0	CB	3	Inhibitory/non-telencephalic neurons	890	0.585393	GSM7464460
766	A2	GSE234321	h1930001	CBL	cere	2			CB	CB_0	CB	3	Inhibitory/non-telencephalic neurons	980	0.541837	GSM7464468
767	A2	GSE234321	h1930001	CBL	cere	2			CB	CB_2	CB	3	Inhibitory/non-telencephalic neurons	968	0.58781	GSM7464469
768	A2	GSE234321	h1930001	CBL	cere	2			CB	CB_1	CB	3	Inhibitory/non-telencephalic neurons	1255	0.522311	GSM7464471
769	A2	GSE234321	h1930001	CBL	cere	2			CB	CB_1	CB	3	Inhibitory/non-telencephalic neurons	945	0.564021	GSM7464478
770	A2	GSE234321	h1930001	CBL	cere	2			CB	CB_1	CB	3	Inhibitory/non-telencephalic neurons	950	0.575263	GSM7464483
771	A2	GSE234321	h1930001	CBL	cere	2			CB	CB_1	CB	3	Inhibitory/non-telencephalic neurons	918	0.566449	GSM7464487
772	A2	GSE234321	h1930001	CBL	cere	2			CB	CB_0	CB	3	Inhibitory/non-telencephalic neurons	924	0.544372	GSM7464488
773	A2	GSE234321	h1930001	CBL	cere	2			CB	CB_0	CB	3	Inhibitory/non-telencephalic neurons	1330	0.538722	GSM7464489
774	A2	GSE234321	h1930001	CBL	cere	2			CB	CB_1	CB	3	Inhibitory/non-telencephalic neurons	907	0.510474	GSM7464491
775	A2	GSE234321	h1930001	CBL	cere	2			CB	CB_0	CB	3	Inhibitory/non-telencephalic neurons	1043	0.565676	GSM7464524
776	A2	GSE234321	h1930001	CBL	cere	2			CB	CB_0	CB	3	Inhibitory/non-telencephalic neurons	993	0.605237	GSM7464529
777	A2	GSE234321	h1930001	CBL	cere	2			CB	CB_0	CB	3	Inhibitory/non-telencephalic neurons	874	0.574371	GSM7464537
778	A2	GSE234321	h1930001	CBL	cere	2			CB	CB_1	CB	3	Inhibitory/non-telencephalic neurons	961	0.566077	GSM7464544
779	A2	GSE234321	h1930001	CBL	cere	2			CB	CB_2	CB	3	Inhibitory/non-telencephalic neurons	969	0.586171	GSM7464587
780	A2	GSE234321	h1930001	CBL	cere	2			CB	CB_1	CB	3	Inhibitory/non-telencephalic neurons	951	0.514196	GSM7464594
781	A2	GSE234321	h1930001	CBL	cere	2			CB	CB_1	CB	3	Inhibitory/non-telencephalic neurons	1176	0.497449	GSM7464603
782	A2	GSE234321	h1930001	CBL	cere	2			CB	CB_1	CB	3	Inhibitory/non-telencephalic neurons	962	0.526507	GSM7464606
783	A2	GSE234321	h1930001	CBL	cere	2			CB	CB_1	CB	3	Inhibitory/non-telencephalic neurons	3872	0.495846	GSM7464609
784	A2	GSE234321	h1930001	CBL	cere	2			CB	CB_0	CB	3	Inhibitory/non-telencephalic neurons	994	0.573441	GSM7464610
785	A2	GSE234321	h1930001	CBL	cere	2			CB	CB_0	CB	3	Inhibitory/non-telencephalic neurons	1010	0.551485	GSM7464616
786	A2	GSE234321	h1930001	CBL	cere	2			CB	CB_0	CB	3	Inhibitory/non-telencephalic neurons	950	0.592632	GSM7464678
787	A2	GSE234321	h1930001	CBL	cere	2			CB	CB_1	CB	3	Inhibitory/non-telencephalic neurons	991	0.514127	GSM7464748
788	A2	GSE234321	h1930001	CBL	cere	2			CB	CB_2	CB	3	Inhibitory/non-telencephalic neurons	923	0.587216	GSM7464807
789	A2	GSE234321	h1930001	CBL	cere	2			CB	CB_0	CB	3	Inhibitory/non-telencephalic neurons	990	0.544444	GSM7464889
790	A2	GSE234321	h1930001	CBL	cere	2			CB	CB_0	CB	3	Inhibitory/non-telencephalic neurons	1059	0.579792	GSM7464904
791	A2	GSE234321	h1930001	CBL	cere	2			CB	CB_1	CB	3	Inhibitory/non-telencephalic neurons	1003	0.544367	GSM7464918
792	A2	GSE234321	h1930001	CBL	cere	2			CB	CB_0	CB	3	Inhibitory/non-telencephalic neurons	997	0.568706	GSM7463418
793	A2	GSE234321	h1930001	CBL	cere	2			CB	CB_0	CB	3	Inhibitory/non-telencephalic neurons	924	0.570346	GSM7463422
794	A2	GSE234321	h1930001	CBL	cere	2			CB	CB_0	CB	3	Inhibitory/non-telencephalic neurons	962	0.585759	GSM7463423
795	A2	GSE234321	h1930001	CBL	cere	2			CB	CB_0	CB	3	Inhibitory/non-telencephalic neurons	1045	0.637321	GSM7463427
796	A2	GSE234321	h1930001	CBL	cere	2			CB	CB_0	CB	3	Inhibitory/non-telencephalic neurons	975	0.618462	GSM7463428
797	A2	GSE234321	h1930001	CBL	cere	2			CB	CB_1	CB	3	Inhibitory/non-telencephalic neurons	901	0.529412	GSM7463429
798	A2	GSE234321	h1930001	CBL	cere	2			CB	CB_1	CB	3	Inhibitory/non-telencephalic neurons	959	0.520334	GSM7463436
799	A2	GSE234321	h1930001	CBL	cere	2			CB	CB_0	CB	3	Inhibitory/non-telencephalic neurons	871	0.590126	GSM7463441
800	A2	GSE234321	h1930001	CBL	cere	2			CB	CB_1	CB	3	Inhibitory/non-telencephalic neurons	1043	0.521572	GSM7463442
801	A2	GSE234321	h1930001	CBL	cere	2			CB	CB_1	CB	3	Inhibitory/non-telencephalic neurons	927	0.545847	GSM7463447
802	A2	GSE234321	h1930001	CBL	cere	2			CB	CB_0	CB	3	Inhibitory/non-telencephalic neurons	944	0.529661	GSM7463448
803	A2	GSE234321	h1930001	CBL	cere	2			CB	CB_1	CB	3	Inhibitory/non-telencephalic neurons	969	0.576883	GSM7463449
804	A2	GSE234321	h1930001	CBL	cere	2			CB	CB_0	CB	3	Inhibitory/non-telencephalic neurons	919	0.566921	GSM7463451
805	A2	GSE234321	h1930001	CBL	cere	2			CB	CB_1	CB	3	Inhibitory/non-telencephalic neurons	1109	0.481515	GSM7463456
806	A2	GSE234321	h1930001	CBL	cere	2			CB	CB_1	CB	3	Inhibitory/non-telencephalic neurons	955	0.512565	GSM7463457
807	A2	GSE234321	h1930001	CBL	cere	2			CB	CB_1	CB	3	Inhibitory/non-telencephalic neurons	1006	0.579523	GSM7463459
808	A2	GSE234321	h1930001	CBL	cere	2			CB	CB_0	CB	3	Inhibitory/non-telencephalic neurons	1071	0.614379	GSM7463460
809	A2	GSE234321	h1930001	CBL	cere	2			CB	CB_1	CB	3	Inhibitory/non-telencephalic neurons	1112	0.489209	GSM7463462
810	A2	GSE234321	h1930001	CBL	cere	2			CB	CB_0	CB	3	Inhibitory/non-telencephalic neurons	874	0.524027	GSM7463465
811	A2	GSE234321	h1930001	CBL	cere	2			CB	CB_0	CB	3	Inhibitory/non-telencephalic neurons	929	0.573735	GSM7463469
812	A2	GSE234321	h1930001	CBL	cere	2			CB	CB_1	CB	3	Inhibitory/non-telencephalic neurons	949	0.479452	GSM7463470
813	A2	GSE234321	h1930001	CBL	cere	2			CB	CB_1	CB	3	Inhibitory/non-telencephalic neurons	2554	0.559776	GSM7463473
814	A2	GSE234321	h1930001	CBL	cere	2			CB	CB_1	CB	3	Inhibitory/non-telencephalic neurons	962	0.529106	GSM7463477
815	A2	GSE234321	h1930001	CBL	cere	2			CB	CB_2	CB	3	Inhibitory/non-telencephalic neurons	947	0.626188	GSM7463478
816	A2	GSE234321	h1930001	CBL	cere	2			CB	CB_1	CB	3	Inhibitory/non-telencephalic neurons	1771	0.573405	GSM7463479
817	A2	GSE234321	h1930001	CBL	cere	2			CB	CB_1	CB	3	Inhibitory/non-telencephalic neurons	949	0.476291	GSM7463482
818	A2	GSE234321	h1930001	CBL	cere	2			CB	CB_0	CB	3	Inhibitory/non-telencephalic neurons	1037	0.566056	GSM7463483
819	A2	GSE234321	h1930001	CBL	cere	2			CB	CB_1	CB	3	Inhibitory/non-telencephalic neurons	1098	0.561475	GSM7463484
820	A2	GSE234321	h1930001	CBL	cere	2			CB	CB_1	CB	3	Inhibitory/non-telencephalic neurons	934	0.525696	GSM7463485
821	A2	GSE234321	h1930001	CBL	cere	2			CB	CB_1	CB	3	Inhibitory/non-telencephalic neurons	1002	0.515968	GSM7463495
822	A2	GSE234321	h1930001	CBL	cere	2			CB	CB_1	CB	3	Inhibitory/non-telencephalic neurons	969	0.555212	GSM7463497
823	A2	GSE234321	h1930001	CBL	cere	2			CB	CB_0	CB	3	Inhibitory/non-telencephalic neurons	939	0.571885	GSM7463498
824	A2	GSE234321	h1930001	CBL	cere	2			CB	CB_1	CB	3	Inhibitory/non-telencephalic neurons	831	0.551143	GSM7463500
825	A2	GSE234321	h1930001	CBL	cere	2			CB	CB_2	CB	3	Inhibitory/non-telencephalic neurons	1002	0.610778	GSM7463505
826	A2	GSE234321	h1930001	CBL	cere	2			CB	CB_2	CB	3	Inhibitory/non-telencephalic neurons	978	0.595092	GSM7463506
827	A2	GSE234321	h1930001	CBL	cere	2			CB	CB_1	CB	3	Inhibitory/non-telencephalic neurons	888	0.481982	GSM7463509
828	A2	GSE234321	h1930001	CBL	cere	2			CB	CB_1	CB	3	Inhibitory/non-telencephalic neurons	876	0.509132	GSM7463513
829	A2	GSE234321	h1930001	CBL	cere	2			CB	CB_1	CB	3	Inhibitory/non-telencephalic neurons	1124	0.52669	GSM7463517
830	A2	GSE234321	h1930001	CBL	cere	2			CB	CB_0	CB	3	Inhibitory/non-telencephalic neurons	1811	0.554666	GSM7463518
831	A2	GSE234321	h1930001	CBL	cere	2			CB	CB_1	CB	3	Inhibitory/non-telencephalic neurons	929	0.572659	GSM7463520
832	A2	GSE234321	h1930001	CBL	cere	2			CB	CB_0	CB	3	Inhibitory/non-telencephalic neurons	924	0.546537	GSM7463521
833	A2	GSE234321	h1930001	CBL	cere	2			CB	CB_1	CB	3	Inhibitory/non-telencephalic neurons	862	0.544084	GSM7463523
834	A2	GSE234321	h1930001	CBL	cere	2			CB	CB_2	CB	3	Inhibitory/non-telencephalic neurons	969	0.610939	GSM7463524
835	A2	GSE234321	h1930001	CBL	cere	2			CB	CB_1	CB	3	Inhibitory/non-telencephalic neurons	924	0.52381	GSM7463529
836	A2	GSE234321	h1930001	CBL	cere	2			CB	CB_0	CB	3	Inhibitory/non-telencephalic neurons	1007	0.633565	GSM7463531
837	A2	GSE234321	h1930001	CBL	cere	2			CB	CB_1	CB	3	Inhibitory/non-telencephalic neurons	1057	0.529801	GSM7464941
838	A2	GSE234321	h1930001	CBL	cere	2			CB	CB_1	CB	3	Inhibitory/non-telencephalic neurons	1191	0.536104	GSM7464986
839	A2	GSE234321	h1930001	CBL	cere	2			CB	CB_1	CB	3	Inhibitory/non-telencephalic neurons	910	0.556044	GSM7463415
840	A2	GSE234321	h1930001	CBL	cere	2			CB	CB_2	CB	3	Inhibitory/non-telencephalic neurons	933	0.566988	GSM7463040
841	A2	GSE234321	h1930001	CBL	cere	2			CB	CB_0	CB	3	Inhibitory/non-telencephalic neurons	992	0.572581	GSM7463043
842	A2	GSE234321	h1930001	CBL	cere	2			CB	CB_1	CB	3	Inhibitory/non-telencephalic neurons	876	0.585616	GSM7463044
843	A2	GSE234321	h1930001	CBL	cere	2			CB	CB_1	CB	3	Inhibitory/non-telencephalic neurons	824	0.533981	GSM7463046
844	A2	GSE234321	h1930001	CBL	cere	2			CB	CB_1	CB	3	Inhibitory/non-telencephalic neurons	1118	0.537567	GSM7463058
845	A2	GSE234321	h1930001	CBL	cere	2			CB	CB_1	CB	3	Inhibitory/non-telencephalic neurons	1085	0.478341	GSM7463060
846	A2	GSE234321	h1930001	CBL	cere	2			CB	CB_0	CB	3	Inhibitory/non-telencephalic neurons	1036	0.519305	GSM7463061
847	A2	GSE234321	h1930001	CBL	cere	2			CB	CB_1	CB	3	Inhibitory/non-telencephalic neurons	932	0.5	GSM7463062
848	A2	GSE234321	h1930001	CBL	cere	2			CB	CB_0	CB	3	Inhibitory/non-telencephalic neurons	1744	0.562213	GSM7463063
849	A2	GSE234321	h1930001	CBL	cere	2			CB	CB_0	CB	3	Inhibitory/non-telencephalic neurons	947	0.522703	GSM7463064
850	A2	GSE234321	h1930001	CBL	cere	2			CB	CB_1	CB	3	Inhibitory/non-telencephalic neurons	1101	0.556464	GSM7463067
851	A2	GSE234321	h1930001	CBL	cere	2			CB	CB_0	CB	3	Inhibitory/non-telencephalic neurons	951	0.522608	GSM7463071
852	A2	GSE234321	h1930001	CBL	cere	2			CB	CB_2	CB	3	Inhibitory/non-telencephalic neurons	987	0.598784	GSM7463072
853	A2	GSE234321	h1930001	CBL	cere	2			CB	CB_0	CB	3	Inhibitory/non-telencephalic neurons	941	0.557917	GSM7463078
854	A2	GSE234321	h1930001	CBL	cere	2			CB	CB_1	CB	3	Inhibitory/non-telencephalic neurons	982	0.56721	GSM7463085
855	A2	GSE234321	h1930001	CBL	cere	2			CB	CB_1	CB	3	Inhibitory/non-telencephalic neurons	956	0.506276	GSM7463086
856	A2	GSE234321	h1930001	CBL	cere	2			CB	CB_0	CB	3	Inhibitory/non-telencephalic neurons	980	0.588776	GSM7463087
857	A2	GSE234321	h1930001	CBL	cere	2			CB	CB_0	CB	3	Inhibitory/non-telencephalic neurons	773	0.562743	GSM7463089
858	A2	GSE234321	h1930001	CBL	cere	2			CB	CB_0	CB	3	Inhibitory/non-telencephalic neurons	1027	0.571568	GSM7463090
859	A2	GSE234321	h1930001	CBL	cere	2			CB	CB_0	CB	3	Inhibitory/non-telencephalic neurons	916	0.555677	GSM7463095
860	A2	GSE234321	h1930001	CBL	cere	2			CB	CB_0	CB	3	Inhibitory/non-telencephalic neurons	979	0.538304	GSM7463099
861	A2	GSE234321	h1930001	CBL	cere	2			CB	CB_1	CB	3	Inhibitory/non-telencephalic neurons	928	0.518319	GSM7463106
862	A2	GSE234321	h1930001	CBL	cere	2			CB	CB_1	CB	3	Inhibitory/non-telencephalic neurons	973	0.587873	GSM7463111
863	A2	GSE234321	h1930001	CBL	cere	2			CB	CB_0	CB	3	Inhibitory/non-telencephalic neurons	1033	0.549855	GSM7463112
864	A2	GSE234321	h1930001	CBL	cere	2			CB	CB_1	CB	3	Inhibitory/non-telencephalic neurons	1003	0.564307	GSM7463129
865	A2	GSE234321	h1930001	CBL	cere	2			CB	CB_1	CB	3	Inhibitory/non-telencephalic neurons	845	0.546746	GSM7463130
866	A2	GSE234321	h1930001	CBL	cere	2			CB	CB_0	CB	3	Inhibitory/non-telencephalic neurons	938	0.563966	GSM7463131
867	A2	GSE234321	h1930001	CBL	cere	2			CB	CB_0	CB	3	Inhibitory/non-telencephalic neurons	948	0.541667	GSM7463133
868	A2	GSE234321	h1930001	CBL	cere	2			CB	CB_0	CB	3	Inhibitory/non-telencephalic neurons	1014	0.568047	GSM7463134
869	A2	GSE234321	h1930001	CBL	cere	2			CB	CB_1	CB	3	Inhibitory/non-telencephalic neurons	1063	0.575729	GSM7463135
870	A2	GSE234321	h1930001	CBL	cere	2			CB	CB_0	CB	3	Inhibitory/non-telencephalic neurons	944	0.606462	GSM7463136
871	A2	GSE234321	h1930001	CBL	cere	2			CB	CB_0	CB	3	Inhibitory/non-telencephalic neurons	1126	0.60302	GSM7463137
872	A2	GSE234321	h1930001	CBL	cere	2			CB	CB_0	CB	3	Inhibitory/non-telencephalic neurons	1090	0.6	GSM7463138
873	A2	GSE234321	h1930001	CBL	cere	2			CB	CB_0	CB	3	Inhibitory/non-telencephalic neurons	979	0.582227	GSM7463141
874	A2	GSE234321	h1930001	CBL	cere	2			CB	CB_0	CB	3	Inhibitory/non-telencephalic neurons	1105	0.605882	GSM7463142
875	A2	GSE234321	h1930001	CBL	cere	2			CB	CB_1	CB	3	Inhibitory/non-telencephalic neurons	1026	0.544834	GSM7463143
876	A2	GSE234321	h1930001	CBL	cere	2			CB	CB_1	CB	3	Inhibitory/non-telencephalic neurons	849	0.550059	GSM7463144
877	A2	GSE234321	h1930001	CBL	cere	2			CB	CB_1	CB	3	Inhibitory/non-telencephalic neurons	1069	0.534612	GSM7463145
878	A2	GSE234321	h1930001	CBL	cere	2			CB	CB_1	CB	3	Inhibitory/non-telencephalic neurons	956	0.541841	GSM7463147
879	A2	GSE234321	h1930001	CBL	cere	2			CB	CB_1	CB	3	Inhibitory/non-telencephalic neurons	1006	0.536779	GSM7463149
880	A2	GSE234321	h1930001	CBL	cere	2			CB	CB_0	CB	3	Inhibitory/non-telencephalic neurons	1031	0.535403	GSM7463151
881	A2	GSE234321	h1930001	CBL	cere	2			CB	CB_1	CB	3	Inhibitory/non-telencephalic neurons	1034	0.490329	GSM7463155
882	A2	GSE234321	h1930001	CBL	cere	2			CB	CB_1	CB	3	Inhibitory/non-telencephalic neurons	1061	0.543827	GSM7463156
883	A2	GSE234321	h1930001	CBL	cere	2			CB	CB_0	CB	3	Inhibitory/non-telencephalic neurons	920	0.555435	GSM7463167
884	A2	GSE234321	h1930001	CBL	cere	2			CB	CB_1	CB	3	Inhibitory/non-telencephalic neurons	944	0.538136	GSM7463336
885	A2	GSE234321	h1930001	CBL	cere	2			CB	CB_1	CB	3	Inhibitory/non-telencephalic neurons	991	0.557013	GSM7463340
886	A2	GSE234321	h1930001	CBL	cere	2			CB	CB_2	CB	3	Inhibitory/non-telencephalic neurons	1040	0.579808	GSM7463343
887	A2	GSE234321	h1930001	CBL	cere	2			CB	CB_1	CB	3	Inhibitory/non-telencephalic neurons	1032	0.522771	GSM7463344
888	A2	GSE234321	h1930001	CBL	cere	2			CB	CB_1	CB	3	Inhibitory/non-telencephalic neurons	894	0.538031	GSM7463346
889	A2	GSE234321	h1930001	CBL	cere	2			CB	CB_2	CB	3	Inhibitory/non-telencephalic neurons	920	0.625	GSM7463349
890	A2	GSE234321	h1930001	CBL	cere	2			CB	CB_1	CB	3	Inhibitory/non-telencephalic neurons	890	0.539326	GSM7463354
891	A2	GSE234321	h1930001	CBL	cere	2			CB	CB_1	CB	3	Inhibitory/non-telencephalic neurons	841	0.551724	GSM7463379
892	A2	GSE234321	h1930001	CBL	cere	2			CB	CB_1	CB	3	Inhibitory/non-telencephalic neurons	959	0.544838	GSM7463380
894	A2	GSE234321	h1930001	CBL	cere	2			CB	CB_1	CB	3	Inhibitory/non-telencephalic neurons	1039	0.485082	GSM7463392
895	A2	GSE234321	h1930001	CBL	cere	2			CB	CB_0	CB	3	Inhibitory/non-telencephalic neurons	924	0.52381	GSM7463399
896	A2	GSE234321	h1930001	CBL	cere	2			CB	CB_0	CB	3	Inhibitory/non-telencephalic neurons	896	0.55692	GSM7463400
897	A2	GSE234321	h1930001	CBL	cere	2			CB	CB_0	CB	3	Inhibitory/non-telencephalic neurons	922	0.568872	GSM7463401
898	A2	GSE234321	h1930001	CBL	cere	2			CB	CB_1	CB	3	Inhibitory/non-telencephalic neurons	928	0.483836	GSM7463404
899	A2	GSE234321	h1930001	CBL	cere	2			CB	CB_1	CB	3	Inhibitory/non-telencephalic neurons	910	0.513187	GSM7463406
900	A2	GSE234321	h1930001	CBL	cere	2			CB	CB_1	CB	3	Inhibitory/non-telencephalic neurons	965	0.535751	GSM7463407
901	A2	GSE234321	h1930001	CBL	cere	2			CB	CB_0	CB	3	Inhibitory/non-telencephalic neurons	965	0.560622	GSM7463410
902	A2	GSE234321	h1930001	CBL	cere	2			CB	CB_2	CB	3	Inhibitory/non-telencephalic neurons	896	0.617188	GSM7463411
903	A2	GSE234321	h1930001	CBL	cere	2			MSN-D1	MSN_D1_3	MSN	6	Inhibitory/non-telencephalic neurons	858	0.547786	GSM7464514
904	A2	GSE234321	h1930001	CBL	cere	2			PKJ	PKJ_0	PKJ	2	Inhibitory/non-telencephalic neurons	958	0.594642	GSM7462433
905	A2	GSE234321	h1930001	CBL	cere	2			PKJ	PKJ_0	PKJ	2	Inhibitory/non-telencephalic neurons	1055	0.596209	GSM7462515
906	A2	GSE234321	h1930001	CBL	cere	2			PKJ	PKJ_0	PKJ	2	Inhibitory/non-telencephalic neurons	948	0.580169	GSM7462521
907	A2	GSE234321	h1930001	CBL	cere	2			PKJ	PKJ_0	PKJ	2	Inhibitory/non-telencephalic neurons	1041	0.67147	GSM7462587
908	A2	GSE234321	h1930001	CBL	cere	2			PKJ	PKJ_2	PKJ	2	Inhibitory/non-telencephalic neurons	943	0.648993	GSM7462595
909	A2	GSE234321	h1930001	CBL	cere	2			PKJ	PKJ_0	PKJ	2	Inhibitory/non-telencephalic neurons	1032	0.652132	GSM7462599
910	A2	GSE234321	h1930001	CBL	cere	2			PKJ	PKJ_0	PKJ	2	Inhibitory/non-telencephalic neurons	1152	0.584201	GSM7462615
911	A2	GSE234321	h1930001	CBL	cere	2			PKJ	PKJ_2	PKJ	2	Inhibitory/non-telencephalic neurons	849	0.606007	GSM7462626
912	A2	GSE234321	h1930001	CBL	cere	2			PKJ	PKJ_1	PKJ	2	Inhibitory/non-telencephalic neurons	906	0.655629	GSM7462630
913	A2	GSE234321	h1930001	CBL	cere	2			PKJ	PKJ_1	PKJ	2	Inhibitory/non-telencephalic neurons	961	0.608741	GSM7462668
914	A2	GSE234321	h1930001	CBL	cere	2			PKJ	PKJ_0	PKJ	2	Inhibitory/non-telencephalic neurons	943	0.604454	GSM7462676
915	A2	GSE234321	h1930001	CBL	cere	2			PKJ	PKJ_1	PKJ	2	Inhibitory/non-telencephalic neurons	1015	0.625616	GSM7462804
916	A2	GSE234321	h1930001	CBL	cere	2			PKJ	PKJ_2	PKJ	2	Inhibitory/non-telencephalic neurons	877	0.684151	GSM7462805
917	A2	GSE234321	h1930001	CBL	cere	2			PKJ	PKJ_1	PKJ	2	Inhibitory/non-telencephalic neurons	942	0.652866	GSM7462825
918	A2	GSE234321	h1930001	CBL	cere	2			PKJ	PKJ_1	PKJ	2	Inhibitory/non-telencephalic neurons	1038	0.597303	GSM7462839
919	A2	GSE234321	h1930001	CBL	cere	2			PKJ	PKJ_0	PKJ	2	Inhibitory/non-telencephalic neurons	932	0.590665	GSM7462849
920	A2	GSE234321	h1930001	CBL	cere	2			PKJ	PKJ_1	PKJ	2	Inhibitory/non-telencephalic neurons	968	0.641529	GSM7462883
921	A2	GSE234321	h1930001	CBL	cere	2			PKJ	PKJ_0	PKJ	2	Inhibitory/non-telencephalic neurons	1037	0.543877	GSM7462961
922	A2	GSE234321	h1930001	CBL	cere	2			PKJ	PKJ_1	PKJ	2	Inhibitory/non-telencephalic neurons	1022	0.621331	GSM7463014
923	A2	GSE234321	h1930001	CBL	cere	2			PKJ	PKJ_0	PKJ	2	Inhibitory/non-telencephalic neurons	1166	0.604631	GSM7463208
924	A2	GSE234321	h1930001	CBL	cere	2			PKJ	PKJ_0	PKJ	2	Inhibitory/non-telencephalic neurons	995	0.61809	GSM7463212
925	A2	GSE234321	h1930001	CBL	cere	2			PKJ	PKJ_2	PKJ	2	Inhibitory/non-telencephalic neurons	954	0.667715	GSM7463285
926	A2	GSE234321	h1930001	CBL	cere	2			PKJ	PKJ_1	PKJ	2	Inhibitory/non-telencephalic neurons	894	0.606264	GSM7463305
927	A2	GSE234321	h1930001	CBL	cere	2			PKJ	PKJ_0	PKJ	2	Inhibitory/non-telencephalic neurons	942	0.644374	GSM7464919
928	A2	GSE234321	h1930001	CBL	cere	2			PKJ	PKJ_1	PKJ	2	Inhibitory/non-telencephalic neurons	999	0.586587	GSM7463555
929	A2	GSE234321	h1930001	CBL	cere	2			PKJ	PKJ_0	PKJ	2	Inhibitory/non-telencephalic neurons	928	0.649784	GSM7464342
930	A2	GSE234321	h1930001	CBL	cere	2			PKJ	PKJ_0	PKJ	2	Inhibitory/non-telencephalic neurons	924	0.642857	GSM7464461
931	A2	GSE234321	h1930001	CBL	cere	2			PKJ	PKJ_0	PKJ	2	Inhibitory/non-telencephalic neurons	1010	0.563366	GSM7464476
932	A2	GSE234321	h1930001	CBL	cere	2			PKJ	PKJ_0	PKJ	2	Inhibitory/non-telencephalic neurons	909	0.59736	GSM7464497
933	A2	GSE234321	h1930001	CBL	cere	2			PKJ	PKJ_0	PKJ	2	Inhibitory/non-telencephalic neurons	1049	0.616778	GSM7464548
934	A2	GSE234321	h1930001	CBL	cere	2			PKJ	PKJ_0	PKJ	2	Inhibitory/non-telencephalic neurons	932	0.585837	GSM7464561
935	A2	GSE234321	h1930001	CBL	cere	2			PKJ	PKJ_0	PKJ	2	Inhibitory/non-telencephalic neurons	936	0.583333	GSM7464590
936	A2	GSE234321	h1930001	CBL	cere	2			PKJ	PKJ_0	PKJ	2	Inhibitory/non-telencephalic neurons	1015	0.619704	GSM7464598
937	A2	GSE234321	h1930001	CBL	cere	2			PKJ	PKJ_0	PKJ	2	Inhibitory/non-telencephalic neurons	977	0.613101	GSM7464617
938	A2	GSE234321	h1930001	CBL	cere	2			PKJ	PKJ_2	PKJ	2	Inhibitory/non-telencephalic neurons	904	0.661504	GSM7464824
939	A2	GSE234321	h1930001	CBL	cere	2			PKJ	PKJ_0	PKJ	2	Inhibitory/non-telencephalic neurons	985	0.624365	GSM7464888
940	A2	GSE234321	h1930001	CBL	cere	2			PKJ	PKJ_2	PKJ	2	Inhibitory/non-telencephalic neurons	1052	0.670152	GSM7464895
941	A2	GSE234321	h1930001	CBL	cere	2			PKJ	PKJ_1	PKJ	2	Inhibitory/non-telencephalic neurons	981	0.56371	GSM7464903
942	A2	GSE234321	h1930001	CBL	cere	2			PKJ	PKJ_0	PKJ	2	Inhibitory/non-telencephalic neurons	1095	0.623744	GSM7464987
943	A2	GSE234321	h1930001	CBL	cere	2			PKJ	PKJ_0	PKJ	2	Inhibitory/non-telencephalic neurons	929	0.609257	GSM7463435
944	A2	GSE234321	h1930001	CBL	cere	2			PKJ	PKJ_0	PKJ	2	Inhibitory/non-telencephalic neurons	916	0.650655	GSM7463444
945	A2	GSE234321	h1930001	CBL	cere	2			PKJ	PKJ_1	PKJ	2	Inhibitory/non-telencephalic neurons	936	0.63515	GSM7463466
946	A2	GSE234321	h1930001	CBL	cere	2			PKJ	PKJ_0	PKJ	2	Inhibitory/non-telencephalic neurons	946	0.598837	GSM7463471
947	A2	GSE234321	h1930001	CBL	cere	2			PKJ	PKJ_2	PKJ	2	Inhibitory/non-telencephalic neurons	863	0.618772	GSM7463481
948	A2	GSE234321	h1930001	CBL	cere	2			PKJ	PKJ_2	PKJ	2	Inhibitory/non-telencephalic neurons	978	0.680982	GSM7464920
949	A2	GSE234321	h1930001	CBL	cere	2			PKJ	PKJ_2	PKJ	2	Inhibitory/non-telencephalic neurons	1118	0.630143	GSM7464936
950	A2	GSE234321	h1930001	CBL	cere	2			PKJ	PKJ_0	PKJ	2	Inhibitory/non-telencephalic neurons	1055	0.6	GSM7464961
951	A2	GSE234321	h1930001	CBL	cere	2			PKJ	PKJ_0	PKJ	2	Inhibitory/non-telencephalic neurons	932	0.610515	GSM7464963
952	A2	GSE234321	h1930001	CBL	cere	2			PKJ	PKJ_2	PKJ	2	Inhibitory/non-telencephalic neurons	1095	0.653881	GSM7464969
953	A2	GSE234321	h1930001	CBL	cere	2			PKJ	PKJ_0	PKJ	2	Inhibitory/non-telencephalic neurons	875	0.619429	GSM7463088
954	A2	GSE234321	h1930001	CBL	cere	2			PKJ	PKJ_0	PKJ	2	Inhibitory/non-telencephalic neurons	1019	0.585868	GSM7463128
955	A2	GSE234321	h1930001	CBL	cere	2			PKJ	PKJ_0	PKJ	2	Inhibitory/non-telencephalic neurons	977	0.602866	GSM7463326
956	A2	GSE234321	h1930001	CBL	cere	2			PKJ	PKJ_0	PKJ	2	Inhibitory/non-telencephalic neurons	929	0.595264	GSM7463375
957	A2	GSE234321	h1930001	CBL	cere	2			PKJ	PKJ_0	PKJ	2	Inhibitory/non-telencephalic neurons	949	0.620653	GSM7463408
958	A2	GSE234321	h1930001	CBL	cere	2			ASC	Bergmann-glia	NN	20.1	Non-neuronal Cells	977	0.668373	GSM7462431
959	A2	GSE234321	h1930001	CBL	cere	2			ASC	Bergmann-glia	NN	20.1	Non-neuronal Cells	1042	0.634837	GSM7462499
960	A2	GSE234321	h1930001	CBL	cere	2			ASC	ASC_2	NN	20.1	Non-neuronal Cells	994	0.569416	GSM7462525
961	A2	GSE234321	h1930001	CBL	cere	2			ASC	ASC_3	NN	20.1	Non-neuronal Cells	1025	0.634634	GSM7462541
962	A2	GSE234321	h1930001	CBL	cere	2			ASC	Bergmann-glia	NN	20.1	Non-neuronal Cells	870	0.632184	GSM7462591
963	A2	GSE234321	h1930001	CBL	cere	2			ASC	ASC_3	NN	20.1	Non-neuronal Cells	1000	0.448	GSM7462631
964	A2	GSE234321	h1930001	CBL	cere	2			ASC	Bergmann-glia	NN	20.1	Non-neuronal Cells	1062	0.610169	GSM7462635
965	A2	GSE234321	h1930001	CBL	cere	2			ASC	ASC_2	NN	20.1	Non-neuronal Cells	902	0.558758	GSM7462694
966	A2	GSE234321	h1930001	CBL	cere	2			ASC	Bergmann-glia	NN	20.1	Non-neuronal Cells	901	0.601554	GSM7462777
967	A2	GSE234321	h1930001	CBL	cere	2			ASC	ASC_3	NN	20.1	Non-neuronal Cells	977	0.566018	GSM7462784
968	A2	GSE234321	h1930001	CBL	cere	2			ASC	Bergmann-glia	NN	20.1	Non-neuronal Cells	1108	0.522563	GSM7462978
969	A2	GSE234321	h1930001	CBL	cere	2			ASC	Bergmann-glia	NN	20.1	Non-neuronal Cells	848	0.626179	GSM7462986
970	A2	GSE234321	h1930001	CBL	cere	2			ASC	Bergmann-glia	NN	20.1	Non-neuronal Cells	965	0.615544	GSM7463025
971	A2	GSE234321	h1930001	CBL	cere	2			ASC	Bergmann-glia	NN	20.1	Non-neuronal Cells	1085	0.64977	GSM7463031
972	A2	GSE234321	h1930001	CBL	cere	2			ASC	ASC_3	NN	20.1	Non-neuronal Cells	1110	0.572973	GSM7463235
973	A2	GSE234321	h1930001	CBL	cere	2			ASC	Bergmann-glia	NN	20.1	Non-neuronal Cells	949	0.622761	GSM7463281
974	A2	GSE234321	h1930001	CBL	cere	2			ASC	Bergmann-glia	NN	20.1	Non-neuronal Cells	937	0.611526	GSM7463554
975	A2	GSE234321	h1930001	CBL	cere	2			ASC	Bergmann-glia	NN	20.1	Non-neuronal Cells	981	0.626911	GSM7463572
976	A2	GSE234321	h1930001	CBL	cere	2			ASC	Bergmann-glia	NN	20.1	Non-neuronal Cells	904	0.613938	GSM7463892
977	A2	GSE234321	h1930001	CBL	cere	2			ASC	Bergmann-glia	NN	20.1	Non-neuronal Cells	1312	0.605056	GSM7464124
978	A2	GSE234321	h1930001	CBL	cere	2			ASC	Bergmann-glia	NN	20.1	Non-neuronal Cells	964	0.576763	GSM7464521
979	A2	GSE234321	h1930001	CBL	cere	2			ASC	Bergmann-glia	NN	20.1	Non-neuronal Cells	878	0.64123	GSM7464562
980	A2	GSE234321	h1930001	CBL	cere	2			ASC	Bergmann-glia	NN	20.1	Non-neuronal Cells	846	0.653073	GSM7464586
981	A2	GSE234321	h1930001	CBL	cere	2			ASC	Bergmann-glia	NN	20.1	Non-neuronal Cells	895	0.603352	GSM7464595
982	A2	GSE234321	h1930001	CBL	cere	2			ASC	Bergmann-glia	NN	20.1	Non-neuronal Cells	956	0.61454	GSM7464630
983	A2	GSE234321	h1930001	CBL	cere	2			ASC	Bergmann-glia	NN	20.1	Non-neuronal Cells	950	0.656842	GSM7464842
984	A2	GSE234321	h1930001	CBL	cere	2			ASC	Bergmann-glia	NN	20.1	Non-neuronal Cells	1053	0.632479	GSM7463525
985	A2	GSE234321	h1930001	CBL	cere	2			ASC	Bergmann-glia	NN	20.1	Non-neuronal Cells	1030	0.625243	GSM7464925
986	A2	GSE234321	h1930001	CBL	cere	2			ASC	Bergmann-glia	NN	20.1	Non-neuronal Cells	995	0.621608	GSM7464935
987	A2	GSE234321	h1930001	CBL	cere	2			ASC	Bergmann-glia	NN	20.1	Non-neuronal Cells	1033	0.651016	GSM7464940
988	A2	GSE234321	h1930001	CBL	cere	2			ASC	Bergmann-glia	NN	20.1	Non-neuronal Cells	909	0.671617	GSM7464957
989	A2	GSE234321	h1930001	CBL	cere	2			ASC	Bergmann-glia	NN	20.1	Non-neuronal Cells	897	0.61204	GSM7463047
990	A2	GSE234321	h1930001	CBL	cere	2			ASC	Bergmann-glia	NN	20.1	Non-neuronal Cells	960	0.604167	GSM7463108
991	A2	GSE234321	h1930001	CBL	cere	2			ASC	Bergmann-glia	NN	20.1	Non-neuronal Cells	903	0.66113	GSM7463325
992	A2	GSE234321	h1930001	CBL	cere	2			ASC	Bergmann-glia	NN	20.1	Non-neuronal Cells	956	0.614017	GSM7463327
993	A2	GSE234321	h1930001	CBL	cere	2			ASC	Bergmann-glia	NN	20.1	Non-neuronal Cells	916	0.627729	GSM7463328
994	A2	GSE234321	h1930001	CBL	cere	2			EC	EC_0	NN	20	Non-neuronal Cells	980	0.589796	GSM7464864
995	A2	GSE234321	h1930001	CBL	cere	2			EC	EC_0	NN	20	Non-neuronal Cells	911	0.659715	GSM7463467
996	A2	GSE234321	h1930001	CBL	cere	2			MGC	MGC_0	NN	20	Non-neuronal Cells	1043	0.68744	GSM7462832
997	A2	GSE234321	h1930001	CBL	cere	2			MGC	MGC_0	NN	20	Non-neuronal Cells	1008	0.584325	GSM7462862
998	A2	GSE234321	h1930001	CBL	cere	2			MGC	MGC_0	NN	20	Non-neuronal Cells	929	0.685684	GSM7463027
999	A2	GSE234321	h1930001	CBL	cere	2			MGC	MGC_0	NN	20	Non-neuronal Cells	916	0.720524	GSM7464378
1000	A2	GSE234321	h1930001	CBL	cere	2			ODC	ODC_1	NN	20.3	Non-neuronal Cells	996	0.521586	GSM7462401
1001	A2	GSE234321	h1930001	CBL	cere	2			ODC	ODC_0	NN	20.3	Non-neuronal Cells	901	0.475028	GSM7462421
1002	A2	GSE234321	h1930001	CBL	cere	2			ODC	ODC_1	NN	20.3	Non-neuronal Cells	1054	0.494307	GSM7462424
1003	A2	GSE234321	h1930001	CBL	cere	2			ODC	ODC_1	NN	20.3	Non-neuronal Cells	943	0.514316	GSM7462427
1004	A2	GSE234321	h1930001	CBL	cere	2			ODC	ODC_1	NN	20.3	Non-neuronal Cells	998	0.522044	GSM7462437
1005	A2	GSE234321	h1930001	CBL	cere	2			ODC	ODC_0	NN	20.3	Non-neuronal Cells	903	0.524917	GSM7462440
1006	A2	GSE234321	h1930001	CBL	cere	2			ODC	ODC_1	NN	20.3	Non-neuronal Cells	995	0.500503	GSM7462446
1007	A2	GSE234321	h1930001	CBL	cere	2			ODC	ODC_1	NN	20.3	Non-neuronal Cells	930	0.532258	GSM7462473
1008	A2	GSE234321	h1930001	CBL	cere	2			ODC	ODC_1	NN	20.3	Non-neuronal Cells	1034	0.499033	GSM7462518
1009	A2	GSE234321	h1930001	CBL	cere	2			ODC	ODC_1	NN	20.3	Non-neuronal Cells	907	0.507166	GSM7462543
1010	A2	GSE234321	h1930001	CBL	cere	2			ODC	ODC_1	NN	20.3	Non-neuronal Cells	979	0.516854	GSM7462547
1011	A2	GSE234321	h1930001	CBL	cere	2			ODC	ODC_1	NN	20.3	Non-neuronal Cells	1082	0.539279	GSM7462575
1012	A2	GSE234321	h1930001	CBL	cere	2			ODC	ODC_1	NN	20.3	Non-neuronal Cells	1069	0.540692	GSM7462601
1013	A2	GSE234321	h1930001	CBL	cere	2			ODC	ODC_1	NN	20.3	Non-neuronal Cells	967	0.493278	GSM7462602
1014	A2	GSE234321	h1930001	CBL	cere	2			ODC	ODC_1	NN	20.3	Non-neuronal Cells	921	0.525516	GSM7462606
1015	A2	GSE234321	h1930001	CBL	cere	2			ODC	ODC_1	NN	20.3	Non-neuronal Cells	1037	0.526519	GSM7462632
1016	A2	GSE234321	h1930001	CBL	cere	2			ODC	ODC_1	NN	20.3	Non-neuronal Cells	1107	0.499548	GSM7462640
1017	A2	GSE234321	h1930001	CBL	cere	2			ODC	ODC_1	NN	20.3	Non-neuronal Cells	1075	0.525581	GSM7462688
1018	A2	GSE234321	h1930001	CBL	cere	2			ODC	ODC_1	NN	20.3	Non-neuronal Cells	1032	0.498062	GSM7462724
1019	A2	GSE234321	h1930001	CBL	cere	2			ODC	ODC_1	NN	20.3	Non-neuronal Cells	1035	0.445411	GSM7462769
1020	A2	GSE234321	h1930001	CBL	cere	2			ODC	ODC_1	NN	20.3	Non-neuronal Cells	934	0.517131	GSM7462787
1021	A2	GSE234321	h1930001	CBL	cere	2			ODC	ODC_1	NN	20.3	Non-neuronal Cells	1023	0.512219	GSM7462814
1022	A2	GSE234321	h1930001	CBL	cere	2			ODC	ODC_1	NN	20.3	Non-neuronal Cells	998	0.502004	GSM7462816
1023	A2	GSE234321	h1930001	CBL	cere	2			ODC	ODC_1	NN	20.3	Non-neuronal Cells	928	0.508621	GSM7462828
1024	A2	GSE234321	h1930001	CBL	cere	2			ODC	ODC_1	NN	20.3	Non-neuronal Cells	937	0.548559	GSM7462842
1025	A2	GSE234321	h1930001	CBL	cere	2			ODC	ODC_1	NN	20.3	Non-neuronal Cells	1068	0.540262	GSM7462867
1026	A2	GSE234321	h1930001	CBL	cere	2			ODC	ODC_1	NN	20.3	Non-neuronal Cells	932	0.494635	GSM7462874
1027	A2	GSE234321	h1930001	CBL	cere	2			ODC	ODC_1	NN	20.3	Non-neuronal Cells	947	0.517423	GSM7462979
1028	A2	GSE234321	h1930001	CBL	cere	2			ODC	ODC_1	NN	20.3	Non-neuronal Cells	1054	0.478178	GSM7462891
1029	A2	GSE234321	h1930001	CBL	cere	2			ODC	ODC_1	NN	20.3	Non-neuronal Cells	1021	0.530852	GSM7462896
1030	A2	GSE234321	h1930001	CBL	cere	2			ODC	ODC_1	NN	20.3	Non-neuronal Cells	986	0.501014	GSM7462913
1031	A2	GSE234321	h1930001	CBL	cere	2			ODC	ODC_1	NN	20.3	Non-neuronal Cells	1222	0.528914	GSM7462920
1032	A2	GSE234321	h1930001	CBL	cere	2			ODC	ODC_1	NN	20.3	Non-neuronal Cells	934	0.523555	GSM7462953
1033	A2	GSE234321	h1930001	CBL	cere	2			ODC	ODC_1	NN	20.3	Non-neuronal Cells	1120	0.516964	GSM7462980
1034	A2	GSE234321	h1930001	CBL	cere	2			ODC	ODC_1	NN	20.3	Non-neuronal Cells	930	0.527957	GSM7462982
1035	A2	GSE234321	h1930001	CBL	cere	2			ODC	ODC_1	NN	20.3	Non-neuronal Cells	1029	0.531584	GSM7463008
1036	A2	GSE234321	h1930001	CBL	cere	2			ODC	ODC_1	NN	20.3	Non-neuronal Cells	884	0.485294	GSM7463174
1037	A2	GSE234321	h1930001	CBL	cere	2			ODC	ODC_1	NN	20.3	Non-neuronal Cells	882	0.494709	GSM7463202
1038	A2	GSE234321	h1930001	CBL	cere	2			ODC	ODC_1	NN	20.3	Non-neuronal Cells	1102	0.533273	GSM7463222
1039	A2	GSE234321	h1930001	CBL	cere	2			ODC	ODC_1	NN	20.3	Non-neuronal Cells	990	0.50404	GSM7463226
1040	A2	GSE234321	h1930001	CBL	cere	2			ODC	ODC_1	NN	20.3	Non-neuronal Cells	983	0.498474	GSM7463236
1041	A2	GSE234321	h1930001	CBL	cere	2			ODC	ODC_1	NN	20.3	Non-neuronal Cells	1032	0.541667	GSM7463244
1042	A2	GSE234321	h1930001	CBL	cere	2			ODC	ODC_1	NN	20.3	Non-neuronal Cells	1094	0.497258	GSM7463283
1043	A2	GSE234321	h1930001	CBL	cere	2			ODC	ODC_1	NN	20.3	Non-neuronal Cells	2079	0.533029	GSM7463609
1044	A2	GSE234321	h1930001	CBL	cere	2			ODC	ODC_1	NN	20.3	Non-neuronal Cells	905	0.464088	GSM7464206
1045	A2	GSE234321	h1930001	CBL	cere	2			ODC	ODC_1	NN	20.3	Non-neuronal Cells	964	0.512448	GSM7464355
1046	A2	GSE234321	h1930001	CBL	cere	2			ODC	ODC_1	NN	20.3	Non-neuronal Cells	1007	0.500993	GSM7464373
1047	A2	GSE234321	h1930001	CBL	cere	2			ODC	ODC_1	NN	20.3	Non-neuronal Cells	854	0.48185	GSM7464452
1048	A2	GSE234321	h1930001	CBL	cere	2			ODC	ODC_1	NN	20.3	Non-neuronal Cells	847	0.507674	GSM7464454
1049	A2	GSE234321	h1930001	CBL	cere	2			ODC	ODC_1	NN	20.3	Non-neuronal Cells	937	0.511206	GSM7464466
1050	A2	GSE234321	h1930001	CBL	cere	2			ODC	ODC_1	NN	20.3	Non-neuronal Cells	942	0.477707	GSM7464480
1051	A2	GSE234321	h1930001	CBL	cere	2			ODC	ODC_1	NN	20.3	Non-neuronal Cells	1032	0.51938	GSM7464486
1052	A2	GSE234321	h1930001	CBL	cere	2			ODC	ODC_1	NN	20.3	Non-neuronal Cells	1040	0.469231	GSM7464527
1053	A2	GSE234321	h1930001	CBL	cere	2			ODC	ODC_1	NN	20.3	Non-neuronal Cells	927	0.480043	GSM7464542
1054	A2	GSE234321	h1930001	CBL	cere	2			ODC	ODC_1	NN	20.3	Non-neuronal Cells	982	0.527495	GSM7464554
1055	A2	GSE234321	h1930001	CBL	cere	2			ODC	ODC_1	NN	20.3	Non-neuronal Cells	848	0.508844	GSM7464568
1056	A2	GSE234321	h1930001	CBL	cere	2			ODC	ODC_1	NN	20.3	Non-neuronal Cells	971	0.477858	GSM7464602
1057	A2	GSE234321	h1930001	CBL	cere	2			ODC	ODC_1	NN	20.3	Non-neuronal Cells	1017	0.488201	GSM7464619
1058	A2	GSE234321	h1930001	CBL	cere	2			ODC	ODC_1	NN	20.3	Non-neuronal Cells	907	0.49118	GSM7464629
1059	A2	GSE234321	h1930001	CBL	cere	2			ODC	ODC_1	NN	20.3	Non-neuronal Cells	924	0.438312	GSM7464736
1060	A2	GSE234321	h1930001	CBL	cere	2			ODC	ODC_1	NN	20.3	Non-neuronal Cells	900	0.511111	GSM7464773
1061	A2	GSE234321	h1930001	CBL	cere	2			ODC	ODC_1	NN	20.3	Non-neuronal Cells	991	0.498486	GSM7464811
1062	A2	GSE234321	h1930001	CBL	cere	2			ODC	ODC_1	NN	20.3	Non-neuronal Cells	1094	0.47075	GSM7464833
1063	A2	GSE234321	h1930001	CBL	cere	2			ODC	ODC_1	NN	20.3	Non-neuronal Cells	905	0.523757	GSM7464865
1064	A2	GSE234321	h1930001	CBL	cere	2			ODC	ODC_1	NN	20.3	Non-neuronal Cells	948	0.495781	GSM7464885
1065	A2	GSE234321	h1930001	CBL	cere	2			ODC	ODC_1	NN	20.3	Non-neuronal Cells	1107	0.568654	GSM7464896
1066	A2	GSE234321	h1930001	CBL	cere	2			ODC	ODC_1	NN	20.3	Non-neuronal Cells	919	0.548422	GSM7464900
1067	A2	GSE234321	h1930001	CBL	cere	2			ODC	ODC_1	NN	20.3	Non-neuronal Cells	989	0.532861	GSM7463417
1068	A2	GSE234321	h1930001	CBL	cere	2			ODC	ODC_1	NN	20.3	Non-neuronal Cells	1020	0.586275	GSM7463420
1069	A2	GSE234321	h1930001	CBL	cere	2			ODC	ODC_1	NN	20.3	Non-neuronal Cells	954	0.514675	GSM7463431
1070	A2	GSE234321	h1930001	CBL	cere	2			ODC	ODC_1	NN	20.3	Non-neuronal Cells	948	0.486814	GSM7463434
1071	A2	GSE234321	h1930001	CBL	cere	2			ODC	ODC_1	NN	20.3	Non-neuronal Cells	954	0.515723	GSM7463438
1072	A2	GSE234321	h1930001	CBL	cere	2			ODC	ODC_1	NN	20.3	Non-neuronal Cells	896	0.524554	GSM7463446
1073	A2	GSE234321	h1930001	CBL	cere	2			ODC	ODC_1	NN	20.3	Non-neuronal Cells	990	0.657576	GSM7463453
1074	A2	GSE234321	h1930001	CBL	cere	2			ODC	ODC_1	NN	20.3	Non-neuronal Cells	1017	0.454769	GSM7463455
1075	A2	GSE234321	h1930001	CBL	cere	2			ODC	ODC_1	NN	20.3	Non-neuronal Cells	1032	0.47093	GSM7463461
1076	A2	GSE234321	h1930001	CBL	cere	2			ODC	ODC_1	NN	20.3	Non-neuronal Cells	1014	0.4714	GSM7463486
1077	A2	GSE234321	h1930001	CBL	cere	2			ODC	ODC_1	NN	20.3	Non-neuronal Cells	1025	0.52	GSM7463512
1078	A2	GSE234321	h1930001	CBL	cere	2			ODC	ODC_1	NN	20.3	Non-neuronal Cells	1015	0.492611	GSM7463532
1079	A2	GSE234321	h1930001	CBL	cere	2			ODC	ODC_1	NN	20.3	Non-neuronal Cells	972	0.493827	GSM7463533
1080	A2	GSE234321	h1930001	CBL	cere	2			ODC	ODC_1	NN	20.3	Non-neuronal Cells	989	0.490394	GSM7464926
1081	A2	GSE234321	h1930001	CBL	cere	2			ODC	ODC_1	NN	20.3	Non-neuronal Cells	1116	0.496416	GSM7464927
1082	A2	GSE234321	h1930001	CBL	cere	2			ODC	ODC_1	NN	20.3	Non-neuronal Cells	1010	0.460396	GSM7464931
1083	A2	GSE234321	h1930001	CBL	cere	2			ODC	ODC_1	NN	20.3	Non-neuronal Cells	951	0.489485	GSM7464949
1084	A2	GSE234321	h1930001	CBL	cere	2			ODC	ODC_0	NN	20.3	Non-neuronal Cells	1222	0.521277	GSM7464965
1085	A2	GSE234321	h1930001	CBL	cere	2			ODC	ODC_1	NN	20.3	Non-neuronal Cells	1019	0.496565	GSM7464971
1086	A2	GSE234321	h1930001	CBL	cere	2			ODC	ODC_0	NN	20.3	Non-neuronal Cells	2144	0.551073	GSM7464982
1087	A2	GSE234321	h1930001	CBL	cere	2			ODC	ODC_1	NN	20.3	Non-neuronal Cells	949	0.488936	GSM7463065
1088	A2	GSE234321	h1930001	CBL	cere	2			ODC	ODC_0	NN	20.3	Non-neuronal Cells	910	0.435165	GSM7463083
1089	A2	GSE234321	h1930001	CBL	cere	2			ODC	ODC_1	NN	20.3	Non-neuronal Cells	886	0.463883	GSM7463105
1090	A2	GSE234321	h1930001	CBL	cere	2			ODC	ODC_1	NN	20.3	Non-neuronal Cells	1125	0.469778	GSM7463115
1091	A2	GSE234321	h1930001	CBL	cere	2			ODC	ODC_1	NN	20.3	Non-neuronal Cells	1149	0.560487	GSM7463118
1092	A2	GSE234321	h1930001	CBL	cere	2			ODC	ODC_1	NN	20.3	Non-neuronal Cells	963	0.438214	GSM7463170
1093	A2	GSE234321	h1930001	CBL	cere	2			ODC	ODC_0	NN	20.3	Non-neuronal Cells	979	0.564862	GSM7463335
1094	A2	GSE234321	h1930001	CBL	cere	2			ODC	ODC_1	NN	20.3	Non-neuronal Cells	1039	0.532243	GSM7463359
1095	A2	GSE234321	h1930001	CBL	cere	2			ODC	ODC_1	NN	20.3	Non-neuronal Cells	837	0.458781	GSM7463373
1096	A2	GSE234321	h1930001	CBL	cere	2			ODC	ODC_1	NN	20.3	Non-neuronal Cells	992	0.447581	GSM7463397
1097	A2	GSE234321	h1930001	CBL	cere	2			ODC	ODC_1	NN	20.3	Non-neuronal Cells	900	0.488889	GSM7463405
1098	A2	GSE234321	h1930001	CBL	cere	2			ODC	ODC_1	NN	20.3	Non-neuronal Cells	902	0.528271	GSM7463412
1099	A2	GSE234321	h1930001	CBL	cere	2			ODC	ODC_1	NN	20.3	Non-neuronal Cells	966	0.462733	GSM7463414
1100	A2	GSE234321	h1930001	CBL	cere	2			OPC	OPC_0	NN	20.2	Non-neuronal Cells	935	0.509091	GSM7462528
1101	A2	GSE234321	h1930001	CBL	cere	2			OPC	OPC_0	NN	20.2	Non-neuronal Cells	1059	0.483475	GSM7462553
1102	A2	GSE234321	h1930001	CBL	cere	2			OPC	OPC_0	NN	20.2	Non-neuronal Cells	947	0.519535	GSM7462583
1103	A2	GSE234321	h1930001	CBL	cere	2			OPC	OPC_0	NN	20.2	Non-neuronal Cells	962	0.516632	GSM7462613
1104	A2	GSE234321	h1930001	CBL	cere	2			OPC	OPC_0	NN	20.2	Non-neuronal Cells	1108	0.53565	GSM7462616
1105	A2	GSE234321	h1930001	CBL	cere	2			OPC	OPC_0	NN	20.2	Non-neuronal Cells	968	0.5	GSM7462649
1106	A2	GSE234321	h1930001	CBL	cere	2			OPC	OPC_0	NN	20.2	Non-neuronal Cells	985	0.488325	GSM7462789
1107	A2	GSE234321	h1930001	CBL	cere	2			OPC	OPC_0	NN	20.2	Non-neuronal Cells	1016	0.534449	GSM7462833
1108	A2	GSE234321	h1930001	CBL	cere	2			OPC	OPC_0	NN	20.2	Non-neuronal Cells	1008	0.445437	GSM7462836
1109	A2	GSE234321	h1930001	CBL	cere	2			OPC	OPC_0	NN	20.2	Non-neuronal Cells	985	0.433503	GSM7462905
1110	A2	GSE234321	h1930001	CBL	cere	2			OPC	OPC_0	NN	20.2	Non-neuronal Cells	979	0.49285	GSM7462952
1111	A2	GSE234321	h1930001	CBL	cere	2			OPC	OPC_0	NN	20.2	Non-neuronal Cells	1020	0.492157	GSM7462965
1112	A2	GSE234321	h1930001	CBL	cere	2			OPC	OPC_0	NN	20.2	Non-neuronal Cells	1082	0.480591	GSM7462981
1113	A2	GSE234321	h1930001	CBL	cere	2			OPC	OPC_0	NN	20.2	Non-neuronal Cells	1027	0.476144	GSM7462987
1114	A2	GSE234321	h1930001	CBL	cere	2			OPC	OPC_0	NN	20.2	Non-neuronal Cells	920	0.511957	GSM7463265
1115	A2	GSE234321	h1930001	CBL	cere	2			OPC	OPC_0	NN	20.2	Non-neuronal Cells	819	0.481074	GSM7463296
1116	A2	GSE234321	h1930001	CBL	cere	2			OPC	OPC_0	NN	20.2	Non-neuronal Cells	905	0.453039	GSM7463573
1117	A2	GSE234321	h1930001	CBL	cere	2			OPC	OPC_0	NN	20.2	Non-neuronal Cells	946	0.470402	GSM7464475
1118	A2	GSE234321	h1930001	CBL	cere	2			OPC	OPC_0	NN	20.2	Non-neuronal Cells	934	0.501071	GSM7464477
1119	A2	GSE234321	h1930001	CBL	cere	2			OPC	OPC_0	NN	20.2	Non-neuronal Cells	966	0.469979	GSM7464481
1120	A2	GSE234321	h1930001	CBL	cere	2			OPC	OPC_0	NN	20.2	Non-neuronal Cells	1013	0.486673	GSM7464493
1121	A2	GSE234321	h1930001	CBL	cere	2			OPC	OPC_0	NN	20.2	Non-neuronal Cells	927	0.483279	GSM7464501
1122	A2	GSE234321	h1930001	CBL	cere	2			OPC	OPC_0	NN	20.2	Non-neuronal Cells	901	0.479467	GSM7464570
1123	A2	GSE234321	h1930001	CBL	cere	2			OPC	OPC_0	NN	20.2	Non-neuronal Cells	909	0.50055	GSM7464768
1124	A2	GSE234321	h1930001	CBL	cere	2			OPC	OPC_0	NN	20.2	Non-neuronal Cells	964	0.494813	GSM7464836
1125	A2	GSE234321	h1930001	CBL	cere	2			OPC	OPC_0	NN	20.2	Non-neuronal Cells	924	0.521104	GSM7464874
1126	A2	GSE234321	h1930001	CBL	cere	2			OPC	OPC_0	NN	20.2	Non-neuronal Cells	998	0.463427	GSM7463440
1127	A2	GSE234321	h1930001	CBL	cere	2			OPC	OPC_0	NN	20.2	Non-neuronal Cells	853	0.47714	GSM7463445
1128	A2	GSE234321	h1930001	CBL	cere	2			OPC	OPC_0	NN	20.2	Non-neuronal Cells	1082	0.500924	GSM7463530
1129	A2	GSE234321	h1930001	CBL	cere	2			OPC	OPC_0	NN	20.2	Non-neuronal Cells	1059	0.507082	GSM7464956
1130	A2	GSE234321	h1930001	CBL	cere	2			OPC	OPC_0	NN	20.2	Non-neuronal Cells	917	0.491821	GSM7464979
1131	A2	GSE234321	h1930001	CBL	cere	2			OPC	OPC_0	NN	20.2	Non-neuronal Cells	991	0.462159	GSM7463041
1132	A2	GSE234321	h1930001	CBL	cere	2			OPC	OPC_0	NN	20.2	Non-neuronal Cells	971	0.428424	GSM7463042
1133	A2	GSE234321	h1930001	CBL	cere	2			OPC	OPC_0	NN	20.2	Non-neuronal Cells	830	0.554217	GSM7463080
1134	A2	GSE234321	h1930001	CBL	cere	2			OPC	OPC_0	NN	20.2	Non-neuronal Cells	992	0.517137	GSM7463166
1135	A2	GSE234321	h1930001	CBL	cere	2			VLMC	VLMC_0	NN	20	Non-neuronal Cells	932	0.599785	GSM7462413
1136	A2	GSE234321	h1930001	CBL	cere	2			VLMC	VLMC_0	NN	20	Non-neuronal Cells	882	0.578231	GSM7462441
1137	A2	GSE234321	h1930001	CBL	cere	2			VLMC	VLMC_0	NN	20	Non-neuronal Cells	982	0.572301	GSM7462614
1138	A2	GSE234321	h1930001	CBL	cere	2			VLMC	VLMC_0	NN	20	Non-neuronal Cells	1130	0.495575	GSM7462646
1139	A2	GSE234321	h1930001	CBL	cere	2			VLMC	VLMC_0	NN	20	Non-neuronal Cells	937	0.557097	GSM7462663
1140	A2	GSE234321	h1930001	CBL	cere	2			VLMC	VLMC_0	NN	20	Non-neuronal Cells	997	0.544132	GSM7462873
1141	A2	GSE234321	h1930001	CBL	cere	2			VLMC	VLMC_0	NN	20	Non-neuronal Cells	1062	0.584746	GSM7463239
1142	A2	GSE234321	h1930001	CBL	cere	2			VLMC	VLMC_0	NN	20	Non-neuronal Cells	948	0.582278	GSM7463257
1143	A2	GSE234321	h1930001	CBL	cere	2			VLMC	VLMC_0	NN	20	Non-neuronal Cells	981	0.510703	GSM7464422
1144	A2	GSE234321	h1930001	CBL	cere	2			VLMC	VLMC_0	NN	20	Non-neuronal Cells	974	0.583162	GSM7464532
1145	A2	GSE234321	h1930001	CBL	cere	2			VLMC	VLMC_0	NN	20	Non-neuronal Cells	934	0.485011	GSM7464558
1146	A2	GSE234321	h1930001	CBL	cere	2			VLMC	VLMC_0	NN	20	Non-neuronal Cells	1184	0.660473	GSM7464883
1147	A2	GSE234321	h1930001	CBL	cere	2			VLMC	VLMC_0	NN	20	Non-neuronal Cells	919	0.589227	GSM7464922
1148	A2	GSE234321	h1930001	CBL	cere	2			VLMC	VLMC_0	NN	20	Non-neuronal Cells	1054	0.610057	GSM7463054
1167	A3	GSE203133	h1930001	CA1C-CA2C-CA3C-DGC-CA4C	HIP	5	HIP	5	Lamp5	Lamp5_0	Lamp5	9	Inhibitory/non-telencephalic neurons	845	0.553846	GSM6157920
1171	A3	GSE203133	h1930001	CA1C-CA2C-CA3C-DGC-CA4C	HIP	5	HIP	5	Lamp5	Lamp5_3	Lamp5	9	Inhibitory/non-telencephalic neurons	955	0.58377	GSM6158982
1175	A3	GSE203133	h1930001	CA1C-CA2C-CA3C-DGC-CA4C	HIP	5	HIP	5	Lamp5	Lamp5_1	Lamp5	9	Inhibitory/non-telencephalic neurons	852	0.589202	GSM6159966
1205	A3	GSE203133	h1930001	CA1C-CA2C-CA3C-DGC-CA4C	HIP	5	HIP	5	Pvalb	Pvalb_0	Pvalb	13	Inhibitory/non-telencephalic neurons	1636	0.681948	GSM6159834
1206	A3	GSE203133	h1930001	CA1C-CA2C-CA3C-DGC-CA4C	HIP	5	HIP	5	Pvalb	Pvalb_1	Pvalb	13	Inhibitory/non-telencephalic neurons	831	0.73225	GSM6159936
1209	A3	GSE203133	h1930001	CA1C-CA2C-CA3C-DGC-CA4C	HIP	5	HIP	5	Pvalb-ChC	Pvalb_ChC_1	Pvalb	13	Inhibitory/non-telencephalic neurons	1369	0.66691	GSM6157680
1210	A3	GSE203133	h1930001	CA1C-CA2C-CA3C-DGC-CA4C	HIP	5	HIP	5	Pvalb-ChC	Pvalb_ChC_1	Pvalb	13	Inhibitory/non-telencephalic neurons	2661	0.563635	GSM6159331
1220	A3	GSE203133	h1930001	CA1C-CA2C-CA3C-DGC-CA4C	HIP	5	HIP	5	Sncg	Sncg_3	Sncg	10	Inhibitory/non-telencephalic neurons	1028	0.550584	GSM6158198
1223	A3	GSE203133	h1930001	CA1C-CA2C-CA3C-DGC-CA4C	HIP	5	HIP	5	Sncg	Sncg_3	Sncg	10	Inhibitory/non-telencephalic neurons	1000	0.531	GSM6159922
1241	A3	GSE203133	h1930001	CA1C-CA2C-CA3C-DGC-CA4C	HIP	5	HIP	5	Sst	Sst_0	Sst	12	Inhibitory/non-telencephalic neurons	914	0.649891	GSM6158410
1243	A3	GSE203133	h1930001	CA1C-CA2C-CA3C-DGC-CA4C	HIP	5	HIP	5	Sst	Sst_1	Sst	12	Inhibitory/non-telencephalic neurons	803	0.60523	GSM6159077
1244	A3	GSE203133	h1930001	CA1C-CA2C-CA3C-DGC-CA4C	HIP	5	HIP	5	Sst	Sst_1	Sst	12	Inhibitory/non-telencephalic neurons	1349	0.616383	GSM6159452
1245	A3	GSE203133	h1930001	CA1C-CA2C-CA3C-DGC-CA4C	HIP	5	HIP	5	Sst	Sst_2	Sst	12	Inhibitory/non-telencephalic neurons	2051	0.536486	GSM6159469
1246	A3	GSE203133	h1930001	CA1C-CA2C-CA3C-DGC-CA4C	HIP	5	HIP	5	Sst	Sst_4	Sst	12	Inhibitory/non-telencephalic neurons	1292	0.649381	GSM6159681
1272	A3	GSE203133	h1930001	CA1C-CA2C-CA3C-DGC-CA4C	HIP	5	HIP	5	Vip	Vip_8	Vip	11	Inhibitory/non-telencephalic neurons	872	0.597286	GSM6157902
1275	A3	GSE203133	h1930001	CA1C-CA2C-CA3C-DGC-CA4C	HIP	5	HIP	5	Vip	Vip_4	Vip	11	Inhibitory/non-telencephalic neurons	1288	0.560947	GSM6157953
1278	A3	GSE203133	h1930001	CA1C-CA2C-CA3C-DGC-CA4C	HIP	5	HIP	5	Vip	Vip_0	Vip	11	Inhibitory/non-telencephalic neurons	1602	0.622035	GSM6158378
1279	A3	GSE203133	h1930001	CA1C-CA2C-CA3C-DGC-CA4C	HIP	5	HIP	5	Vip	Vip_2	Vip	11	Inhibitory/non-telencephalic neurons	967	0.591003	GSM6158515
1280	A3	GSE203133	h1930001	CA1C-CA2C-CA3C-DGC-CA4C	HIP	5	HIP	5	Vip	Vip_6	Vip	11	Inhibitory/non-telencephalic neurons	818	0.638753	GSM6159011
1282	A3	GSE203133	h1930001	CA1C-CA2C-CA3C-DGC-CA4C	HIP	5	HIP	5	Vip	Vip_7	Vip	11	Inhibitory/non-telencephalic neurons	1106	0.54566	GSM6159741
1290	A3	GSE203133	h1930001	CA1C-CA2C-CA3C-DGC-CA4C	HIP	5	HIP	5	ASC	ASC_0	NN	20.1	Non-neuronal Cells	806	0.574855	GSM6157668
1294	A3	GSE203133	h1930001	CA1C-CA2C-CA3C-DGC-CA4C	HIP	5	HIP	5	ASC	ASC_2	NN	20.1	Non-neuronal Cells	3238	0.565987	GSM6158244
1295	A3	GSE203133	h1930001	CA1C-CA2C-CA3C-DGC-CA4C	HIP	5	HIP	5	EC	EC_0	NN	20	Non-neuronal Cells	1806	0.52644	GSM6157463
1296	A3	GSE203133	h1930001	CA1C-CA2C-CA3C-DGC-CA4C	HIP	5	HIP	5	EC	EC_0	NN	20	Non-neuronal Cells	962	0.586798	GSM6159484
1300	A3	GSE203133	h1930001	CA1C-CA2C-CA3C-DGC-CA4C	HIP	5	HIP	5	MGC	MGC_0	NN	20	Non-neuronal Cells	818	0.695599	GSM6157631
1303	A3	GSE203133	h1930001	CA1C-CA2C-CA3C-DGC-CA4C	HIP	5	HIP	5	MGC	MGC_0	NN	20	Non-neuronal Cells	870	0.63908	GSM6157648
1314	A3	GSE203133	h1930001	CA1C-CA2C-CA3C-DGC-CA4C	HIP	5	HIP	5	ODC	ODC_1	NN	20.3	Non-neuronal Cells	879	0.515358	GSM6157632
1320	A3	GSE203133	h1930001	CA1C-CA2C-CA3C-DGC-CA4C	HIP	5	HIP	5	ODC	ODC_1	NN	20.3	Non-neuronal Cells	848	0.529481	GSM6157655
1333	A3	GSE203133	h1930001	CA1C-CA2C-CA3C-DGC-CA4C	HIP	5	HIP	5	ODC	ODC_1	NN	20.3	Non-neuronal Cells	888	0.47973	GSM6158008
1341	A3	GSE203133	h1930001	CA1C-CA2C-CA3C-DGC-CA4C	HIP	5	HIP	5	ODC	ODC_1	NN	20.3	Non-neuronal Cells	1001	0.522145	GSM6158734
1343	A3	GSE203133	h1930001	CA1C-CA2C-CA3C-DGC-CA4C	HIP	5	HIP	5	ODC	ODC_1	NN	20.3	Non-neuronal Cells	959	0.482795	GSM6159039
1344	A3	GSE203133	h1930001	CA1C-CA2C-CA3C-DGC-CA4C	HIP	5	HIP	5	ODC	ODC_1	NN	20.3	Non-neuronal Cells	1154	0.558059	GSM6159565
1345	A3	GSE203133	h1930001	CA1C-CA2C-CA3C-DGC-CA4C	HIP	5	HIP	5	ODC	ODC_1	NN	20.3	Non-neuronal Cells	946	0.570296	GSM6159660
1349	A3	GSE203133	h1930001	CA1C-CA2C-CA3C-DGC-CA4C	HIP	5	HIP	5	ODC	ODC_1	NN	20.3	Non-neuronal Cells	950	0.498947	GSM6160145
1352	A3	GSE203133	h1930001	CA1C-CA2C-CA3C-DGC-CA4C	HIP	5	HIP	5	PC	PC_0	NN	20	Non-neuronal Cells	1401	0.527123	GSM6157952
1353	A3	GSE203133	h1930001	CA1C-CA2C-CA3C-DGC-CA4C	HIP	5	HIP	5	CA1	CA1_2	CA	16	Telencephalic excitatory neurons	829	0.576598	GSM6157316
1354	A3	GSE203133	h1930001	CA1C-CA2C-CA3C-DGC-CA4C	HIP	5	HIP	5	CA1	CA1_1	CA	16	Telencephalic excitatory neurons	937	0.531661	GSM6157394
1365	A3	GSE203133	h1930001	CA1C-CA2C-CA3C-DGC-CA4C	HIP	5	HIP	5	DG	DG_0	DG	17	Telencephalic excitatory neurons	840	0.486905	GSM6157375
1377	A3	GSE203133	h1930001	CA1C-CA2C-CA3C-DGC-CA4C	HIP	5	HIP	5	DG	DG_0	DG	17	Telencephalic excitatory neurons	843	0.429419	GSM6157529
1380	A3	GSE203133	h1930001	CA1C-CA2C-CA3C-DGC-CA4C	HIP	5	HIP	5	DG	DG_0	DG	17	Telencephalic excitatory neurons	837	0.444444	GSM6157581
1394	A3	GSE203133	h1930001	CA1C-CA2C-CA3C-DGC-CA4C	HIP	5	HIP	5	DG	DG_0	DG	17	Telencephalic excitatory neurons	841	0.44352	GSM6157799
1400	A3	GSE203133	h1930001	CA1C-CA2C-CA3C-DGC-CA4C	HIP	5	HIP	5	DG	DG_0	DG	17	Telencephalic excitatory neurons	838	0.47494	GSM6157861
1424	A3	GSE203133	h1930001	CA1C-CA2C-CA3C-DGC-CA4C	HIP	5	HIP	5	DG	DG_0	DG	17	Telencephalic excitatory neurons	1059	0.429651	GSM6158233
1425	A3	GSE203133	h1930001	CA1C-CA2C-CA3C-DGC-CA4C	HIP	5	HIP	5	DG	DG_0	DG	17	Telencephalic excitatory neurons	1029	0.505345	GSM6158608
1432	A3	GSE203133	h1930001	CA1C-CA2C-CA3C-DGC-CA4C	HIP	5	HIP	5	DG	DG_0	DG	17	Telencephalic excitatory neurons	997	0.463223	GSM6159880
1434	A3	GSE203133	h1930001	CA1C-CA2C-CA3C-DGC-CA4C	HIP	5	HIP	5	DG	DG_0	DG	17	Telencephalic excitatory neurons	1074	0.493017	GSM6160026
1454	A3	GSE203133	h1930001	CA1C-CA2C-CA3C-DGC-CA4C	HIP	5	HIP	5	HIP-Misc1	HIP_Misc1_0	HIP-Misc	15	Telencephalic excitatory neurons	1391	0.55931	GSM6158028
1455	A3	GSE203133	h1930001	CA1C-CA2C-CA3C-DGC-CA4C	HIP	5	HIP	5	HIP-Misc1	HIP_Misc1_0	HIP-Misc	15	Telencephalic excitatory neurons	1227	0.652812	GSM6158997
1456	A3	GSE203133	h1930001	CA1C-CA2C-CA3C-DGC-CA4C	HIP	5	HIP	5	HIP-Misc1	HIP_Misc1_0	HIP-Misc	15	Telencephalic excitatory neurons	978	0.554192	GSM6159517
1504	A3	GSE203133	h1930001	CA1C-CA2C-CA3C-DGC-CA4C	HIP	5	HIP	5	HIP-Misc2	HIP_Misc2_0	HIP-Misc	15	Telencephalic excitatory neurons	1959	0.558278	GSM6159859
1507	A3	GSE203133	h1930001	CA1C-CA2C-CA3C-DGC-CA4C	HIP	5	HIP	5	HIP-Misc2	HIP_Misc2_2	HIP-Misc	15	Telencephalic excitatory neurons	1123	0.544227	GSM6160158
1528	A3	GSE203133	h1930001	CA1C-CA2C-CA3C-DGC-CA4C	HIP	5	HIP	5	L4-IT	L4_IT_5	L4_6	18	Telencephalic excitatory neurons	846	0.582742	GSM6157824
1540	A3	GSE203133	h1930001	CA1C-CA2C-CA3C-DGC-CA4C	HIP	5	HIP	5	L5/6-NP	L56_NP_0	L4_6	18	Telencephalic excitatory neurons	1345	0.632342	GSM6157963
1541	A3	GSE203133	h1930001	CA1C-CA2C-CA3C-DGC-CA4C	HIP	5	HIP	5	L5/6-NP	L56_NP_4	L4_6	18	Telencephalic excitatory neurons	853	0.699883	GSM6159919
1552	A3	GSE203133	h1930001	CA1C-CA2C-CA3C-DGC-CA4C	HIP	5	HIP	5	L6b	L6b_0	L4_6	18	Telencephalic excitatory neurons	909	0.583058	GSM6158455
1562	A3	GSE203133	h1930001	CA1C-CA2C-CA3C-DGC-CA4C	HIP	5	HIP	5	L6-CT	L6_CT_0	L4_6	18	Telencephalic excitatory neurons	1797	0.661519	GSM6158404
1565	A3	GSE203133	h1930001	CA1C-CA2C-CA3C-DGC-CA4C	HIP	5	HIP	5	L6-IT-Car3	L6_IT_Car3_0	L4_6	18	Telencephalic excitatory neurons	1195	0.508787	GSM6158620
1573	A4	GSE231722	H1930001	A44-A45	cortex	6	FC	1	Lamp5	Lamp5_0	Lamp5	9	Inhibitory/non-telencephalic neurons	971	0.575695	GSM7297605
1574	A4	GSE231722	H1930001	A44-A45	cortex	6	FC	1	Lamp5	Lamp5_3	Lamp5	9	Inhibitory/non-telencephalic neurons	999	0.576076	GSM7297719
1575	A4	GSE231722	H1930001	A44-A45	cortex	6	FC	1	Lamp5	Lamp5_3	Lamp5	9	Inhibitory/non-telencephalic neurons	1045	0.638278	GSM7297774
1576	A4	GSE231722	H1930001	A44-A45	cortex	6	FC	1	Lamp5	Lamp5_1	Lamp5	9	Inhibitory/non-telencephalic neurons	1075	0.59907	GSM7297898
1577	A4	GSE231722	H1930001	A44-A45	cortex	6	FC	1	Lamp5	Lamp5_3	Lamp5	9	Inhibitory/non-telencephalic neurons	889	0.620922	GSM7297900
1581	A4	GSE231722	H1930001	A44-A45	cortex	6	FC	1	Lamp5-Lhx6	Lamp5_LHX6_0	Lamp5	9	Inhibitory/non-telencephalic neurons	797	0.642409	GSM7297169
1584	A4	GSE231722	H1930001	A44-A45	cortex	6	FC	1	Lamp5-Lhx6	Lamp5_LHX6_0	Lamp5	9	Inhibitory/non-telencephalic neurons	908	0.689427	GSM7297726
1592	A4	GSE231722	H1930001	A44-A45	cortex	6	FC	1	Pvalb	Pvalb_2	Pvalb	13	Inhibitory/non-telencephalic neurons	851	0.682726	GSM7296941
1593	A4	GSE231722	H1930001	A44-A45	cortex	6	FC	1	Pvalb	Pvalb_0	Pvalb	13	Inhibitory/non-telencephalic neurons	902	0.64745	GSM7296945
1601	A4	GSE231722	H1930001	A44-A45	cortex	6	FC	1	Pvalb	Pvalb_0	Pvalb	13	Inhibitory/non-telencephalic neurons	812	0.754926	GSM7297145
1605	A4	GSE231722	H1930001	A44-A45	cortex	6	FC	1	Pvalb	Pvalb_3	Pvalb	13	Inhibitory/non-telencephalic neurons	970	0.736082	GSM7297583
1606	A4	GSE231722	H1930001	A44-A45	cortex	6	FC	1	Pvalb	Pvalb_1	Pvalb	13	Inhibitory/non-telencephalic neurons	823	0.650668	GSM7297615
1610	A4	GSE231722	H1930001	A44-A45	cortex	6	FC	1	Pvalb	Pvalb_1	Pvalb	13	Inhibitory/non-telencephalic neurons	845	0.721893	GSM7297674
1611	A4	GSE231722	H1930001	A44-A45	cortex	6	FC	1	Pvalb	Pvalb_4	Pvalb	13	Inhibitory/non-telencephalic neurons	853	0.740914	GSM7297717
1612	A4	GSE231722	H1930001	A44-A45	cortex	6	FC	1	Pvalb	Pvalb_2	Pvalb	13	Inhibitory/non-telencephalic neurons	979	0.674157	GSM7297721
1613	A4	GSE231722	H1930001	A44-A45	cortex	6	FC	1	Pvalb	Pvalb_2	Pvalb	13	Inhibitory/non-telencephalic neurons	972	0.676955	GSM7297727
1614	A4	GSE231722	H1930001	A44-A45	cortex	6	FC	1	Pvalb	Pvalb_1	Pvalb	13	Inhibitory/non-telencephalic neurons	827	0.741233	GSM7297733
1615	A4	GSE231722	H1930001	A44-A45	cortex	6	FC	1	Pvalb	Pvalb_0	Pvalb	13	Inhibitory/non-telencephalic neurons	1014	0.690335	GSM7297735
1619	A4	GSE231722	H1930001	A44-A45	cortex	6	FC	1	Pvalb	Pvalb_2	Pvalb	13	Inhibitory/non-telencephalic neurons	918	0.711329	GSM7297793
1620	A4	GSE231722	H1930001	A44-A45	cortex	6	FC	1	Pvalb	Pvalb_0	Pvalb	13	Inhibitory/non-telencephalic neurons	871	0.619977	GSM7297860
1622	A4	GSE231722	H1930001	A44-A45	cortex	6	FC	1	Pvalb	Pvalb_2	Pvalb	13	Inhibitory/non-telencephalic neurons	887	0.703495	GSM7297890
1627	A4	GSE231722	H1930001	A44-A45	cortex	6	FC	1	Pvalb	Pvalb_2	Pvalb	13	Inhibitory/non-telencephalic neurons	856	0.658879	GSM7298166
1635	A4	GSE231722	H1930001	A44-A45	cortex	6	FC	1	Pvalb-ChC	Pvalb_ChC_0	Pvalb	13	Inhibitory/non-telencephalic neurons	890	0.688764	GSM7297410
1638	A4	GSE231722	H1930001	A44-A45	cortex	6	FC	1	Pvalb-ChC	Pvalb_ChC_0	Pvalb	13	Inhibitory/non-telencephalic neurons	805	0.649689	GSM7297857
1639	A4	GSE231722	H1930001	A44-A45	cortex	6	FC	1	Pvalb-ChC	Pvalb_ChC_2	Pvalb	13	Inhibitory/non-telencephalic neurons	992	0.670531	GSM7298324
1646	A4	GSE231722	H1930001	A44-A45	cortex	6	FC	1	Sncg	Sncg_0	Sncg	10	Inhibitory/non-telencephalic neurons	873	0.670103	GSM7297671
1649	A4	GSE231722	H1930001	A44-A45	cortex	6	FC	1	Sncg	Sncg_3	Sncg	10	Inhibitory/non-telencephalic neurons	865	0.587283	GSM7297780
1650	A4	GSE231722	H1930001	A44-A45	cortex	6	FC	1	Sncg	Sncg_2	Sncg	10	Inhibitory/non-telencephalic neurons	979	0.690501	GSM7297795
1654	A4	GSE231722	H1930001	A44-A45	cortex	6	FC	1	Sncg	Sncg_0	Sncg	10	Inhibitory/non-telencephalic neurons	969	0.668903	GSM7297876
1655	A4	GSE231722	H1930001	A44-A45	cortex	6	FC	1	Sncg	Sncg_0	Sncg	10	Inhibitory/non-telencephalic neurons	895	0.684916	GSM7297903
1656	A4	GSE231722	H1930001	A44-A45	cortex	6	FC	1	Sncg	Sncg_2	Sncg	10	Inhibitory/non-telencephalic neurons	808	0.663366	GSM7297908
1667	A4	GSE231722	H1930001	A44-A45	cortex	6	FC	1	Sst	Sst_6	Sst	12	Inhibitory/non-telencephalic neurons	882	0.643424	GSM7296944
1676	A4	GSE231722	H1930001	A44-A45	cortex	6	FC	1	Sst	Sst_5	Sst	12	Inhibitory/non-telencephalic neurons	943	0.658537	GSM7297116
1680	A4	GSE231722	H1930001	A44-A45	cortex	6	FC	1	Sst	Sst_4	Sst	12	Inhibitory/non-telencephalic neurons	1044	0.615421	GSM7297373
1685	A4	GSE231722	H1930001	A44-A45	cortex	6	FC	1	Sst	Sst_4	Sst	12	Inhibitory/non-telencephalic neurons	908	0.758811	GSM7297598
1688	A4	GSE231722	H1930001	A44-A45	cortex	6	FC	1	Sst	Sst_0	Sst	12	Inhibitory/non-telencephalic neurons	811	0.774353	GSM7297630
1689	A4	GSE231722	H1930001	A44-A45	cortex	6	FC	1	Sst	Sst_4	Sst	12	Inhibitory/non-telencephalic neurons	832	0.758413	GSM7297648
1690	A4	GSE231722	H1930001	A44-A45	cortex	6	FC	1	Sst	Sst_4	Sst	12	Inhibitory/non-telencephalic neurons	876	0.765982	GSM7297660
1691	A4	GSE231722	H1930001	A44-A45	cortex	6	FC	1	Sst	Sst_3	Sst	12	Inhibitory/non-telencephalic neurons	924	0.617965	GSM7297670
1693	A4	GSE231722	H1930001	A44-A45	cortex	6	FC	1	Sst	Sst_0	Sst	12	Inhibitory/non-telencephalic neurons	909	0.725523	GSM7297688
1694	A4	GSE231722	H1930001	A44-A45	cortex	6	FC	1	Sst	Sst_0	Sst	12	Inhibitory/non-telencephalic neurons	856	0.704439	GSM7297707
1695	A4	GSE231722	H1930001	A44-A45	cortex	6	FC	1	Sst	Sst_3	Sst	12	Inhibitory/non-telencephalic neurons	830	0.604819	GSM7297710
1699	A4	GSE231722	H1930001	A44-A45	cortex	6	FC	1	Sst	Sst_6	Sst	12	Inhibitory/non-telencephalic neurons	824	0.745146	GSM7297769
1700	A4	GSE231722	H1930001	A44-A45	cortex	6	FC	1	Sst	Sst_6	Sst	12	Inhibitory/non-telencephalic neurons	883	0.616648	GSM7297778
1701	A4	GSE231722	H1930001	A44-A45	cortex	6	FC	1	Sst	Sst_0	Sst	12	Inhibitory/non-telencephalic neurons	1073	0.631873	GSM7297779
1702	A4	GSE231722	H1930001	A44-A45	cortex	6	FC	1	Sst	Sst_6	Sst	12	Inhibitory/non-telencephalic neurons	893	0.74916	GSM7297805
1705	A4	GSE231722	H1930001	A44-A45	cortex	6	FC	1	Sst	Sst_4	Sst	12	Inhibitory/non-telencephalic neurons	853	0.670574	GSM7297812
1706	A4	GSE231722	H1930001	A44-A45	cortex	6	FC	1	Sst	Sst_3	Sst	12	Inhibitory/non-telencephalic neurons	819	0.654457	GSM7297817
1710	A4	GSE231722	H1930001	A44-A45	cortex	6	FC	1	Sst	Sst_1	Sst	12	Inhibitory/non-telencephalic neurons	846	0.702128	GSM7297849
1714	A4	GSE231722	H1930001	A44-A45	cortex	6	FC	1	Sst	Sst_4	Sst	12	Inhibitory/non-telencephalic neurons	966	0.65528	GSM7297901
1722	A4	GSE231722	H1930001	A44-A45	cortex	6	FC	1	Sst	Sst_3	Sst	12	Inhibitory/non-telencephalic neurons	952	0.617647	GSM7298619
1734	A4	GSE231722	H1930001	A44-A45	cortex	6	FC	1	Vip	Vip_8	Vip	11	Inhibitory/non-telencephalic neurons	798	0.72807	GSM7296893
1740	A4	GSE231722	H1930001	A44-A45	cortex	6	FC	1	Vip	Vip_0	Vip	11	Inhibitory/non-telencephalic neurons	894	0.653803	GSM7297046
1742	A4	GSE231722	H1930001	A44-A45	cortex	6	FC	1	Vip	Vip_1	Vip	11	Inhibitory/non-telencephalic neurons	801	0.634207	GSM7297113
1745	A4	GSE231722	H1930001	A44-A45	cortex	6	FC	1	Vip	Vip_4	Vip	11	Inhibitory/non-telencephalic neurons	917	0.68048	GSM7297600
1746	A4	GSE231722	H1930001	A44-A45	cortex	6	FC	1	Vip	Vip_3	Vip	11	Inhibitory/non-telencephalic neurons	793	0.699454	GSM7297610
1748	A4	GSE231722	H1930001	A44-A45	cortex	6	FC	1	Vip	Vip_4	Vip	11	Inhibitory/non-telencephalic neurons	804	0.681592	GSM7297632
1750	A4	GSE231722	H1930001	A44-A45	cortex	6	FC	1	Vip	Vip_2	Vip	11	Inhibitory/non-telencephalic neurons	823	0.674362	GSM7297665
1753	A4	GSE231722	H1930001	A44-A45	cortex	6	FC	1	Vip	Vip_1	Vip	11	Inhibitory/non-telencephalic neurons	981	0.662589	GSM7297694
1757	A4	GSE231722	H1930001	A44-A45	cortex	6	FC	1	Vip	Vip_5	Vip	11	Inhibitory/non-telencephalic neurons	1067	0.724461	GSM7297740
1759	A4	GSE231722	H1930001	A44-A45	cortex	6	FC	1	Vip	Vip_2	Vip	11	Inhibitory/non-telencephalic neurons	1042	0.636276	GSM7297752
1761	A4	GSE231722	H1930001	A44-A45	cortex	6	FC	1	Vip	Vip_2	Vip	11	Inhibitory/non-telencephalic neurons	1159	0.657463	GSM7297771
1763	A4	GSE231722	H1930001	A44-A45	cortex	6	FC	1	Vip	Vip_4	Vip	11	Inhibitory/non-telencephalic neurons	841	0.705113	GSM7297782
1764	A4	GSE231722	H1930001	A44-A45	cortex	6	FC	1	Vip	Vip_0	Vip	11	Inhibitory/non-telencephalic neurons	824	0.635922	GSM7297785
1765	A4	GSE231722	H1930001	A44-A45	cortex	6	FC	1	Vip	Vip_2	Vip	11	Inhibitory/non-telencephalic neurons	952	0.653361	GSM7297791
1766	A4	GSE231722	H1930001	A44-A45	cortex	6	FC	1	Vip	Vip_3	Vip	11	Inhibitory/non-telencephalic neurons	1201	0.62781	GSM7297797
1768	A4	GSE231722	H1930001	A44-A45	cortex	6	FC	1	Vip	Vip_5	Vip	11	Inhibitory/non-telencephalic neurons	833	0.727491	GSM7297802
1771	A4	GSE231722	H1930001	A44-A45	cortex	6	FC	1	Vip	Vip_4	Vip	11	Inhibitory/non-telencephalic neurons	868	0.690092	GSM7297853
1772	A4	GSE231722	H1930001	A44-A45	cortex	6	FC	1	Vip	Vip_4	Vip	11	Inhibitory/non-telencephalic neurons	1051	0.660324	GSM7297854
1776	A4	GSE231722	H1930001	A44-A45	cortex	6	FC	1	Vip	Vip_4	Vip	11	Inhibitory/non-telencephalic neurons	1008	0.660714	GSM7297907
1778	A4	GSE231722	H1930001	A44-A45	cortex	6	FC	1	Vip	Vip_2	Vip	11	Inhibitory/non-telencephalic neurons	842	0.630641	GSM7297984
1789	A4	GSE231722	H1930001	A44-A45	cortex	6	FC	1	ASC	ASC_0	NN	20.1	Non-neuronal Cells	860	0.587209	GSM7298227
1792	A4	GSE231722	H1930001	A44-A45	cortex	6	FC	1	ASC	ASC_0	NN	20.1	Non-neuronal Cells	1068	0.606273	GSM7299288
1793	A4	GSE231722	H1930001	A44-A45	cortex	6	FC	1	ASC	ASC_0	NN	20.1	Non-neuronal Cells	953	0.56873	GSM7299558
1794	A4	GSE231722	H1930001	A44-A45	cortex	6	FC	1	MGC	MGC_0	NN	20	Non-neuronal Cells	968	0.661157	GSM7297788
1796	A4	GSE231722	H1930001	A44-A45	cortex	6	FC	1	MGC	MGC_0	NN	20	Non-neuronal Cells	1156	0.57872	GSM7299555
1799	A4	GSE231722	H1930001	A44-A45	cortex	6	FC	1	ODC	ODC_0	NN	20.3	Non-neuronal Cells	836	0.48764	GSM7297105
1801	A4	GSE231722	H1930001	A44-A45	cortex	6	FC	1	ODC	ODC_1	NN	20.3	Non-neuronal Cells	923	0.487541	GSM7297176
1807	A4	GSE231722	H1930001	A44-A45	cortex	6	FC	1	ODC	ODC_0	NN	20.3	Non-neuronal Cells	909	0.522552	GSM7297709
1809	A4	GSE231722	H1930001	A44-A45	cortex	6	FC	1	ODC	ODC_1	NN	20.3	Non-neuronal Cells	886	0.497743	GSM7297736
1813	A4	GSE231722	H1930001	A44-A45	cortex	6	FC	1	ODC	ODC_1	NN	20.3	Non-neuronal Cells	1072	0.498134	GSM7299416
1816	A4	GSE231722	H1930001	A44-A45	cortex	6	FC	1	OPC	OPC_0	NN	20.2	Non-neuronal Cells	943	0.550371	GSM7297716
1820	A4	GSE231722	H1930001	A44-A45	cortex	6	FC	1	OPC	OPC_0	NN	20.2	Non-neuronal Cells	967	0.453464	GSM7298343
1821	A4	GSE231722	H1930001	A44-A45	cortex	6	FC	1	OPC	OPC_0	NN	20.2	Non-neuronal Cells	1012	0.555665	GSM7299372
1826	A4	GSE231722	H1930001	A44-A45	cortex	6	FC	1	L2/3-IT	L23_IT_8	L2/3-IT	19	Telencephalic excitatory neurons	804	0.442786	GSM7296573
1829	A4	GSE231722	H1930001	A44-A45	cortex	6	FC	1	L2/3-IT	L23_IT_4	L2/3-IT	19	Telencephalic excitatory neurons	850	0.4	GSM7296599
1839	A4	GSE231722	H1930001	A44-A45	cortex	6	FC	1	L2/3-IT	L23_IT_8	L2/3-IT	19	Telencephalic excitatory neurons	852	0.494914	GSM7296957
1843	A4	GSE231722	H1930001	A44-A45	cortex	6	FC	1	L2/3-IT	L23_IT_8	L2/3-IT	19	Telencephalic excitatory neurons	940	0.464894	GSM7297045
1852	A4	GSE231722	H1930001	A44-A45	cortex	6	FC	1	L2/3-IT	L23_IT_4	L2/3-IT	19	Telencephalic excitatory neurons	915	0.401457	GSM7297125
1855	A4	GSE231722	H1930001	A44-A45	cortex	6	FC	1	L2/3-IT	L23_IT_8	L2/3-IT	19	Telencephalic excitatory neurons	848	0.448113	GSM7297153
1856	A4	GSE231722	H1930001	A44-A45	cortex	6	FC	1	L2/3-IT	L23_IT_6	L2/3-IT	19	Telencephalic excitatory neurons	981	0.428135	GSM7297182
1865	A4	GSE231722	H1930001	A44-A45	cortex	6	FC	1	L2/3-IT	L23_IT_8	L2/3-IT	19	Telencephalic excitatory neurons	819	0.470085	GSM7297482
1875	A4	GSE231722	H1930001	A44-A45	cortex	6	FC	1	L2/3-IT	L23_IT_6	L2/3-IT	19	Telencephalic excitatory neurons	850	0.368235	GSM7297582
1876	A4	GSE231722	H1930001	A44-A45	cortex	6	FC	1	L2/3-IT	L23_IT_6	L2/3-IT	19	Telencephalic excitatory neurons	916	0.342249	GSM7297591
1878	A4	GSE231722	H1930001	A44-A45	cortex	6	FC	1	L2/3-IT	L23_IT_4	L2/3-IT	19	Telencephalic excitatory neurons	868	0.401498	GSM7297596
1879	A4	GSE231722	H1930001	A44-A45	cortex	6	FC	1	L2/3-IT	L23_IT_4	L2/3-IT	19	Telencephalic excitatory neurons	992	0.498992	GSM7297603
1883	A4	GSE231722	H1930001	A44-A45	cortex	6	FC	1	L2/3-IT	L23_IT_6	L2/3-IT	19	Telencephalic excitatory neurons	792	0.429293	GSM7297614
1884	A4	GSE231722	H1930001	A44-A45	cortex	6	FC	1	L2/3-IT	L23_IT_8	L2/3-IT	19	Telencephalic excitatory neurons	892	0.421525	GSM7297621
1885	A4	GSE231722	H1930001	A44-A45	cortex	6	FC	1	L2/3-IT	L23_IT_4	L2/3-IT	19	Telencephalic excitatory neurons	825	0.447273	GSM7297628
1886	A4	GSE231722	H1930001	A44-A45	cortex	6	FC	1	L2/3-IT	L23_IT_0	L2/3-IT	19	Telencephalic excitatory neurons	937	0.519744	GSM7297640
1888	A4	GSE231722	H1930001	A44-A45	cortex	6	FC	1	L2/3-IT	L23_IT_6	L2/3-IT	19	Telencephalic excitatory neurons	836	0.453349	GSM7297662
1889	A4	GSE231722	H1930001	A44-A45	cortex	6	FC	1	L2/3-IT	L23_IT_8	L2/3-IT	19	Telencephalic excitatory neurons	859	0.409779	GSM7297664
1890	A4	GSE231722	H1930001	A44-A45	cortex	6	FC	1	L2/3-IT	L23_IT_8	L2/3-IT	19	Telencephalic excitatory neurons	870	0.487356	GSM7297666
1894	A4	GSE231722	H1930001	A44-A45	cortex	6	FC	1	L2/3-IT	L23_IT_4	L2/3-IT	19	Telencephalic excitatory neurons	870	0.425287	GSM7297703
1895	A4	GSE231722	H1930001	A44-A45	cortex	6	FC	1	L2/3-IT	L23_IT_0	L2/3-IT	19	Telencephalic excitatory neurons	1043	0.518696	GSM7297755
1897	A4	GSE231722	H1930001	A44-A45	cortex	6	FC	1	L2/3-IT	L23_IT_8	L2/3-IT	19	Telencephalic excitatory neurons	1067	0.440956	GSM7297759
1899	A4	GSE231722	H1930001	A44-A45	cortex	6	FC	1	L2/3-IT	L23_IT_6	L2/3-IT	19	Telencephalic excitatory neurons	953	0.499475	GSM7297765
1901	A4	GSE231722	H1930001	A44-A45	cortex	6	FC	1	L2/3-IT	L23_IT_8	L2/3-IT	19	Telencephalic excitatory neurons	1015	0.505419	GSM7297786
1902	A4	GSE231722	H1930001	A44-A45	cortex	6	FC	1	L2/3-IT	L23_IT_0	L2/3-IT	19	Telencephalic excitatory neurons	1007	0.460775	GSM7297787
1903	A4	GSE231722	H1930001	A44-A45	cortex	6	FC	1	L2/3-IT	L23_IT_10	L2/3-IT	19	Telencephalic excitatory neurons	930	0.434409	GSM7297789
1905	A4	GSE231722	H1930001	A44-A45	cortex	6	FC	1	L2/3-IT	L23_IT_4	L2/3-IT	19	Telencephalic excitatory neurons	979	0.376915	GSM7297794
1906	A4	GSE231722	H1930001	A44-A45	cortex	6	FC	1	L2/3-IT	L23_IT_10	L2/3-IT	19	Telencephalic excitatory neurons	828	0.390097	GSM7297806
1907	A4	GSE231722	H1930001	A44-A45	cortex	6	FC	1	L2/3-IT	L23_IT_6	L2/3-IT	19	Telencephalic excitatory neurons	826	0.430387	GSM7297820
1912	A4	GSE231722	H1930001	A44-A45	cortex	6	FC	1	L2/3-IT	L23_IT_6	L2/3-IT	19	Telencephalic excitatory neurons	851	0.457109	GSM7297843
1914	A4	GSE231722	H1930001	A44-A45	cortex	6	FC	1	L2/3-IT	L23_IT_6	L2/3-IT	19	Telencephalic excitatory neurons	1006	0.441352	GSM7297877
1916	A4	GSE231722	H1930001	A44-A45	cortex	6	FC	1	L2/3-IT	L23_IT_4	L2/3-IT	19	Telencephalic excitatory neurons	990	0.491919	GSM7297879
1917	A4	GSE231722	H1930001	A44-A45	cortex	6	FC	1	L2/3-IT	L23_IT_4	L2/3-IT	19	Telencephalic excitatory neurons	932	0.476395	GSM7297882
1918	A4	GSE231722	H1930001	A44-A45	cortex	6	FC	1	L2/3-IT	L23_IT_0	L2/3-IT	19	Telencephalic excitatory neurons	905	0.533702	GSM7297889
1919	A4	GSE231722	H1930001	A44-A45	cortex	6	FC	1	L2/3-IT	L23_IT_4	L2/3-IT	19	Telencephalic excitatory neurons	975	0.500513	GSM7297892
1921	A4	GSE231722	H1930001	A44-A45	cortex	6	FC	1	L2/3-IT	L23_IT_8	L2/3-IT	19	Telencephalic excitatory neurons	876	0.426941	GSM7297902
1926	A4	GSE231722	H1930001	A44-A45	cortex	6	FC	1	L2/3-IT	L23_IT_8	L2/3-IT	19	Telencephalic excitatory neurons	848	0.393868	GSM7298251
1931	A4	GSE231722	H1930001	A44-A45	cortex	6	FC	1	L2/3-IT	L23_IT_4	L2/3-IT	19	Telencephalic excitatory neurons	826	0.417676	GSM7298628
1945	A4	GSE231722	H1930001	A44-A45	cortex	6	FC	1	L4-IT	L4_IT_0	L4_6	18	Telencephalic excitatory neurons	896	0.587054	GSM7297102
1946	A4	GSE231722	H1930001	A44-A45	cortex	6	FC	1	L4-IT	L4_IT_0	L4_6	18	Telencephalic excitatory neurons	967	0.625646	GSM7297126
1954	A4	GSE231722	H1930001	A44-A45	cortex	6	FC	1	L4-IT	L4_IT_0	L4_6	18	Telencephalic excitatory neurons	840	0.610714	GSM7297602
1957	A4	GSE231722	H1930001	A44-A45	cortex	6	FC	1	L4-IT	L4_IT_0	L4_6	18	Telencephalic excitatory neurons	895	0.594413	GSM7297646
1958	A4	GSE231722	H1930001	A44-A45	cortex	6	FC	1	L4-IT	L4_IT_0	L4_6	18	Telencephalic excitatory neurons	786	0.590331	GSM7297675
1961	A4	GSE231722	H1930001	A44-A45	cortex	6	FC	1	L4-IT	L4_IT_0	L4_6	18	Telencephalic excitatory neurons	837	0.585424	GSM7297711
1962	A4	GSE231722	H1930001	A44-A45	cortex	6	FC	1	L4-IT	L4_IT_0	L4_6	18	Telencephalic excitatory neurons	917	0.61723	GSM7297714
1964	A4	GSE231722	H1930001	A44-A45	cortex	6	FC	1	L4-IT	L4_IT_0	L4_6	18	Telencephalic excitatory neurons	845	0.571203	GSM7297750
1965	A4	GSE231722	H1930001	A44-A45	cortex	6	FC	1	L4-IT	L4_IT_0	L4_6	18	Telencephalic excitatory neurons	947	0.554382	GSM7297781
1966	A4	GSE231722	H1930001	A44-A45	cortex	6	FC	1	L4-IT	L4_IT_0	L4_6	18	Telencephalic excitatory neurons	931	0.535983	GSM7297783
1969	A4	GSE231722	H1930001	A44-A45	cortex	6	FC	1	L4-IT	L4_IT_0	L4_6	18	Telencephalic excitatory neurons	1123	0.581478	GSM7297875
1979	A4	GSE231722	H1930001	A44-A45	cortex	6	FC	1	L5/6-NP	L56_NP_1	L4_6	18	Telencephalic excitatory neurons	890	0.66236	GSM7298946
1984	A4	GSE231722	H1930001	A44-A45	cortex	6	FC	1	L5-IT	L5_IT_3	L4_6	18	Telencephalic excitatory neurons	893	0.615901	GSM7296953
1993	A4	GSE231722	H1930001	A44-A45	cortex	6	FC	1	L5-IT	L5_IT_0	L4_6	18	Telencephalic excitatory neurons	958	0.679541	GSM7297601
1996	A4	GSE231722	H1930001	A44-A45	cortex	6	FC	1	L5-IT	L5_IT_3	L4_6	18	Telencephalic excitatory neurons	1028	0.54572	GSM7297625
1999	A4	GSE231722	H1930001	A44-A45	cortex	6	FC	1	L5-IT	L5_IT_1	L4_6	18	Telencephalic excitatory neurons	1066	0.529081	GSM7297730
2001	A4	GSE231722	H1930001	A44-A45	cortex	6	FC	1	L5-IT	L5_IT_3	L4_6	18	Telencephalic excitatory neurons	1139	0.46971	GSM7297763
2009	A4	GSE231722	H1930001	A44-A45	cortex	6	FC	1	L5-IT	L5_IT_3	L4_6	18	Telencephalic excitatory neurons	1028	0.489624	GSM7297868
2011	A4	GSE231722	H1930001	A44-A45	cortex	6	FC	1	L5-IT	L5_IT_3	L4_6	18	Telencephalic excitatory neurons	940	0.656915	GSM7297881
2012	A4	GSE231722	H1930001	A44-A45	cortex	6	FC	1	L5-IT	L5_IT_2	L4_6	18	Telencephalic excitatory neurons	835	0.562275	GSM7297887
2013	A4	GSE231722	H1930001	A44-A45	cortex	6	FC	1	L5-IT	L5_IT_3	L4_6	18	Telencephalic excitatory neurons	1116	0.577957	GSM7297888
2014	A4	GSE231722	H1930001	A44-A45	cortex	6	FC	1	L5-IT	L5_IT_1	L4_6	18	Telencephalic excitatory neurons	858	0.562937	GSM7297899
2025	A4	GSE231722	H1930001	A44-A45	cortex	6	FC	1	L6b	L6b_2	L4_6	18	Telencephalic excitatory neurons	923	0.774648	GSM7297748
2026	A4	GSE231722	H1930001	A44-A45	cortex	6	FC	1	L6b	L6b_2	L4_6	18	Telencephalic excitatory neurons	872	0.695528	GSM7297827
2028	A4	GSE231722	H1930001	A44-A45	cortex	6	FC	1	L6b	L6b_0	L4_6	18	Telencephalic excitatory neurons	946	0.513742	GSM7297869
2038	A4	GSE231722	H1930001	A44-A45	cortex	6	FC	1	L6-CT	L6_CT_0	L4_6	18	Telencephalic excitatory neurons	1047	0.553009	GSM7297577
2041	A4	GSE231722	H1930001	A44-A45	cortex	6	FC	1	L6-CT	L6_CT_0	L4_6	18	Telencephalic excitatory neurons	1096	0.601277	GSM7297762
2044	A4	GSE231722	H1930001	A44-A45	cortex	6	FC	1	L6-IT	L6_IT_2	L4_6	18	Telencephalic excitatory neurons	1637	0.555895	GSM7296942
2045	A4	GSE231722	H1930001	A44-A45	cortex	6	FC	1	L6-IT	L6_IT_0	L4_6	18	Telencephalic excitatory neurons	1180	0.46596	GSM7297312
2049	A4	GSE231722	H1930001	A44-A45	cortex	6	FC	1	L6-IT	L6_IT_4	L4_6	18	Telencephalic excitatory neurons	1061	0.538172	GSM7297792
2052	A4	GSE231722	H1930001	A44-A45	cortex	6	FC	1	L6-IT	L6_IT_2	L4_6	18	Telencephalic excitatory neurons	811	0.490752	GSM7298255
2059	B1	GSE196521	h1930001	CA1C-CA2C-CA3C-DGC-CA4C	HIP	5	HIP	5	Lamp5	Lamp5_3	Lamp5	9	Inhibitory/non-telencephalic neurons	956	0.600418	GSM5886220
2061	B1	GSE196521	h1930001	CA1C-CA2C-CA3C-DGC-CA4C	HIP	5	HIP	5	Lamp5	Lamp5_1	Lamp5	9	Inhibitory/non-telencephalic neurons	853	0.667057	GSM5886874
2064	B1	GSE196521	h1930001	CA1C-CA2C-CA3C-DGC-CA4C	HIP	5	HIP	5	Lamp5	Lamp5_1	Lamp5	9	Inhibitory/non-telencephalic neurons	848	0.601415	GSM5887379
2067	B1	GSE196521	h1930001	CA1C-CA2C-CA3C-DGC-CA4C	HIP	5	HIP	5	Lamp5	Lamp5_1	Lamp5	9	Inhibitory/non-telencephalic neurons	880	0.596591	GSM5887557
2068	B1	GSE196521	h1930001	CA1C-CA2C-CA3C-DGC-CA4C	HIP	5	HIP	5	Lamp5	Lamp5_2	Lamp5	9	Inhibitory/non-telencephalic neurons	1065	0.615023	GSM5887573
2070	B1	GSE196521	h1930001	CA1C-CA2C-CA3C-DGC-CA4C	HIP	5	HIP	5	Lamp5	Lamp5_2	Lamp5	9	Inhibitory/non-telencephalic neurons	793	0.624212	GSM5887625
2071	B1	GSE196521	h1930001	CA1C-CA2C-CA3C-DGC-CA4C	HIP	5	HIP	5	Lamp5	Lamp5_0	Lamp5	9	Inhibitory/non-telencephalic neurons	1011	0.590504	GSM5887669
2072	B1	GSE196521	h1930001	CA1C-CA2C-CA3C-DGC-CA4C	HIP	5	HIP	5	Lamp5	Lamp5_1	Lamp5	9	Inhibitory/non-telencephalic neurons	983	0.604273	GSM5887698
2073	B1	GSE196521	h1930001	CA1C-CA2C-CA3C-DGC-CA4C	HIP	5	HIP	5	Lamp5	Lamp5_2	Lamp5	9	Inhibitory/non-telencephalic neurons	836	0.546651	GSM5887754
2074	B1	GSE196521	h1930001	CA1C-CA2C-CA3C-DGC-CA4C	HIP	5	HIP	5	Lamp5	Lamp5_0	Lamp5	9	Inhibitory/non-telencephalic neurons	966	0.615942	GSM5887759
2075	B1	GSE196521	h1930001	CA1C-CA2C-CA3C-DGC-CA4C	HIP	5	HIP	5	Lamp5	Lamp5_1	Lamp5	9	Inhibitory/non-telencephalic neurons	1078	0.589054	GSM5887763
2078	B1	GSE196521	h1930001	CA1C-CA2C-CA3C-DGC-CA4C	HIP	5	HIP	5	Lamp5	Lamp5_3	Lamp5	9	Inhibitory/non-telencephalic neurons	869	0.621404	GSM5888283
2079	B1	GSE196521	h1930001	CA1C-CA2C-CA3C-DGC-CA4C	HIP	5	HIP	5	Lamp5	Lamp5_3	Lamp5	9	Inhibitory/non-telencephalic neurons	857	0.63944	GSM5888286
2080	B1	GSE196521	h1930001	CA1C-CA2C-CA3C-DGC-CA4C	HIP	5	HIP	5	Lamp5	Lamp5_0	Lamp5	9	Inhibitory/non-telencephalic neurons	824	0.667476	GSM5888315
2081	B1	GSE196521	h1930001	CA1C-CA2C-CA3C-DGC-CA4C	HIP	5	HIP	5	Lamp5	Lamp5_0	Lamp5	9	Inhibitory/non-telencephalic neurons	1316	0.571809	GSM5888337
2082	B1	GSE196521	h1930001	CA1C-CA2C-CA3C-DGC-CA4C	HIP	5	HIP	5	Lamp5-Lhx6	Lamp5_LHX6_1	Lamp5	9	Inhibitory/non-telencephalic neurons	804	0.583333	GSM5886216
2084	B1	GSE196521	h1930001	CA1C-CA2C-CA3C-DGC-CA4C	HIP	5	HIP	5	Lamp5-Lhx6	Lamp5_LHX6_1	Lamp5	9	Inhibitory/non-telencephalic neurons	851	0.675088	GSM5886858
2085	B1	GSE196521	h1930001	CA1C-CA2C-CA3C-DGC-CA4C	HIP	5	HIP	5	Lamp5-Lhx6	Lamp5_LHX6_0	Lamp5	9	Inhibitory/non-telencephalic neurons	964	0.633299	GSM5887581
2087	B1	GSE196521	h1930001	CA1C-CA2C-CA3C-DGC-CA4C	HIP	5	HIP	5	Lamp5-Lhx6	Lamp5_LHX6_1	Lamp5	9	Inhibitory/non-telencephalic neurons	987	0.701114	GSM5887775
2093	B1	GSE196521	h1930001	CA1C-CA2C-CA3C-DGC-CA4C	HIP	5	HIP	5	Lamp5-Lhx6	Lamp5_LHX6_2	Lamp5	9	Inhibitory/non-telencephalic neurons	1291	0.615802	GSM5888412
2094	B1	GSE196521	h1930001	CA1C-CA2C-CA3C-DGC-CA4C	HIP	5	HIP	5	Pvalb	Pvalb_5	Pvalb	13	Inhibitory/non-telencephalic neurons	820	0.704878	GSM5885907
2096	B1	GSE196521	h1930001	CA1C-CA2C-CA3C-DGC-CA4C	HIP	5	HIP	5	Pvalb	Pvalb_4	Pvalb	13	Inhibitory/non-telencephalic neurons	917	0.778626	GSM5886223
2097	B1	GSE196521	h1930001	CA1C-CA2C-CA3C-DGC-CA4C	HIP	5	HIP	5	Pvalb	Pvalb_4	Pvalb	13	Inhibitory/non-telencephalic neurons	877	0.752566	GSM5886227
2098	B1	GSE196521	h1930001	CA1C-CA2C-CA3C-DGC-CA4C	HIP	5	HIP	5	Pvalb	Pvalb_4	Pvalb	13	Inhibitory/non-telencephalic neurons	929	0.766416	GSM5886239
2099	B1	GSE196521	h1930001	CA1C-CA2C-CA3C-DGC-CA4C	HIP	5	HIP	5	Pvalb	Pvalb_2	Pvalb	13	Inhibitory/non-telencephalic neurons	939	0.669862	GSM5886385
2100	B1	GSE196521	h1930001	CA1C-CA2C-CA3C-DGC-CA4C	HIP	5	HIP	5	Pvalb	Pvalb_4	Pvalb	13	Inhibitory/non-telencephalic neurons	839	0.736591	GSM5886505
2104	B1	GSE196521	h1930001	CA1C-CA2C-CA3C-DGC-CA4C	HIP	5	HIP	5	Pvalb	Pvalb_2	Pvalb	13	Inhibitory/non-telencephalic neurons	804	0.726368	GSM5887065
2105	B1	GSE196521	h1930001	CA1C-CA2C-CA3C-DGC-CA4C	HIP	5	HIP	5	Pvalb	Pvalb_3	Pvalb	13	Inhibitory/non-telencephalic neurons	836	0.799043	GSM5887094
2109	B1	GSE196521	h1930001	CA1C-CA2C-CA3C-DGC-CA4C	HIP	5	HIP	5	Pvalb	Pvalb_2	Pvalb	13	Inhibitory/non-telencephalic neurons	889	0.740157	GSM5887546
2110	B1	GSE196521	h1930001	CA1C-CA2C-CA3C-DGC-CA4C	HIP	5	HIP	5	Pvalb	Pvalb_2	Pvalb	13	Inhibitory/non-telencephalic neurons	841	0.66409	GSM5887587
2111	B1	GSE196521	h1930001	CA1C-CA2C-CA3C-DGC-CA4C	HIP	5	HIP	5	Pvalb	Pvalb_0	Pvalb	13	Inhibitory/non-telencephalic neurons	953	0.70724	GSM5887672
2112	B1	GSE196521	h1930001	CA1C-CA2C-CA3C-DGC-CA4C	HIP	5	HIP	5	Pvalb	Pvalb_4	Pvalb	13	Inhibitory/non-telencephalic neurons	1047	0.751671	GSM5887731
2113	B1	GSE196521	h1930001	CA1C-CA2C-CA3C-DGC-CA4C	HIP	5	HIP	5	Pvalb	Pvalb_3	Pvalb	13	Inhibitory/non-telencephalic neurons	1006	0.762425	GSM5887758
2114	B1	GSE196521	h1930001	CA1C-CA2C-CA3C-DGC-CA4C	HIP	5	HIP	5	Pvalb	Pvalb_0	Pvalb	13	Inhibitory/non-telencephalic neurons	889	0.67829	GSM5887776
2115	B1	GSE196521	h1930001	CA1C-CA2C-CA3C-DGC-CA4C	HIP	5	HIP	5	Pvalb	Pvalb_0	Pvalb	13	Inhibitory/non-telencephalic neurons	1030	0.653398	GSM5887795
2116	B1	GSE196521	h1930001	CA1C-CA2C-CA3C-DGC-CA4C	HIP	5	HIP	5	Pvalb	Pvalb_4	Pvalb	13	Inhibitory/non-telencephalic neurons	951	0.763407	GSM5887811
2122	B1	GSE196521	h1930001	CA1C-CA2C-CA3C-DGC-CA4C	HIP	5	HIP	5	Pvalb	Pvalb_0	Pvalb	13	Inhibitory/non-telencephalic neurons	862	0.703016	GSM5888331
2125	B1	GSE196521	h1930001	CA1C-CA2C-CA3C-DGC-CA4C	HIP	5	HIP	5	Pvalb-ChC	Pvalb_ChC_0	Pvalb	13	Inhibitory/non-telencephalic neurons	849	0.707892	GSM5887802
2131	B1	GSE196521	h1930001	CA1C-CA2C-CA3C-DGC-CA4C	HIP	5	HIP	5	Sncg	Sncg_3	Sncg	10	Inhibitory/non-telencephalic neurons	786	0.641221	GSM5887034
2132	B1	GSE196521	h1930001	CA1C-CA2C-CA3C-DGC-CA4C	HIP	5	HIP	5	Sncg	Sncg_2	Sncg	10	Inhibitory/non-telencephalic neurons	1045	0.573206	GSM5887586
2133	B1	GSE196521	h1930001	CA1C-CA2C-CA3C-DGC-CA4C	HIP	5	HIP	5	Sncg	Sncg_1	Sncg	10	Inhibitory/non-telencephalic neurons	861	0.571429	GSM5887701
2137	B1	GSE196521	h1930001	CA1C-CA2C-CA3C-DGC-CA4C	HIP	5	HIP	5	Sst	Sst_0	Sst	12	Inhibitory/non-telencephalic neurons	1187	0.609801	GSM5886171
2139	B1	GSE196521	h1930001	CA1C-CA2C-CA3C-DGC-CA4C	HIP	5	HIP	5	Sst	Sst_1	Sst	12	Inhibitory/non-telencephalic neurons	878	0.748292	GSM5886304
2140	B1	GSE196521	h1930001	CA1C-CA2C-CA3C-DGC-CA4C	HIP	5	HIP	5	Sst	Sst_1	Sst	12	Inhibitory/non-telencephalic neurons	891	0.723906	GSM5886342
2142	B1	GSE196521	h1930001	CA1C-CA2C-CA3C-DGC-CA4C	HIP	5	HIP	5	Sst	Sst_3	Sst	12	Inhibitory/non-telencephalic neurons	786	0.612595	GSM5886411
2149	B1	GSE196521	h1930001	CA1C-CA2C-CA3C-DGC-CA4C	HIP	5	HIP	5	Sst	Sst_0	Sst	12	Inhibitory/non-telencephalic neurons	939	0.700745	GSM5887568
2150	B1	GSE196521	h1930001	CA1C-CA2C-CA3C-DGC-CA4C	HIP	5	HIP	5	Sst	Sst_2	Sst	12	Inhibitory/non-telencephalic neurons	934	0.67666	GSM5887683
2151	B1	GSE196521	h1930001	CA1C-CA2C-CA3C-DGC-CA4C	HIP	5	HIP	5	Sst	Sst_0	Sst	12	Inhibitory/non-telencephalic neurons	970	0.695361	GSM5887740
2152	B1	GSE196521	h1930001	CA1C-CA2C-CA3C-DGC-CA4C	HIP	5	HIP	5	Sst	Sst_2	Sst	12	Inhibitory/non-telencephalic neurons	908	0.650881	GSM5887752
2153	B1	GSE196521	h1930001	CA1C-CA2C-CA3C-DGC-CA4C	HIP	5	HIP	5	THM-MB	THM_MB_THM_1	THM	4	Inhibitory/non-telencephalic neurons	888	0.661036	GSM5887433
2155	B1	GSE196521	h1930001	CA1C-CA2C-CA3C-DGC-CA4C	HIP	5	HIP	5	Vip	Vip_4	Vip	11	Inhibitory/non-telencephalic neurons	828	0.608696	GSM5886257
2157	B1	GSE196521	h1930001	CA1C-CA2C-CA3C-DGC-CA4C	HIP	5	HIP	5	Vip	Vip_2	Vip	11	Inhibitory/non-telencephalic neurons	744	0.747312	GSM5886306
2159	B1	GSE196521	h1930001	CA1C-CA2C-CA3C-DGC-CA4C	HIP	5	HIP	5	Vip	Vip_0	Vip	11	Inhibitory/non-telencephalic neurons	916	0.649563	GSM5886416
2161	B1	GSE196521	h1930001	CA1C-CA2C-CA3C-DGC-CA4C	HIP	5	HIP	5	Vip	Vip_4	Vip	11	Inhibitory/non-telencephalic neurons	805	0.686957	GSM5886850
2168	B1	GSE196521	h1930001	CA1C-CA2C-CA3C-DGC-CA4C	HIP	5	HIP	5	Vip	Vip_1	Vip	11	Inhibitory/non-telencephalic neurons	858	0.698135	GSM5887126
2172	B1	GSE196521	h1930001	CA1C-CA2C-CA3C-DGC-CA4C	HIP	5	HIP	5	Vip	Vip_8	Vip	11	Inhibitory/non-telencephalic neurons	824	0.81068	GSM5887545
2173	B1	GSE196521	h1930001	CA1C-CA2C-CA3C-DGC-CA4C	HIP	5	HIP	5	Vip	Vip_4	Vip	11	Inhibitory/non-telencephalic neurons	1022	0.750489	GSM5887569
2174	B1	GSE196521	h1930001	CA1C-CA2C-CA3C-DGC-CA4C	HIP	5	HIP	5	Vip	Vip_0	Vip	11	Inhibitory/non-telencephalic neurons	883	0.637599	GSM5887598
2175	B1	GSE196521	h1930001	CA1C-CA2C-CA3C-DGC-CA4C	HIP	5	HIP	5	Vip	Vip_5	Vip	11	Inhibitory/non-telencephalic neurons	842	0.678147	GSM5887626
2176	B1	GSE196521	h1930001	CA1C-CA2C-CA3C-DGC-CA4C	HIP	5	HIP	5	Vip	Vip_2	Vip	11	Inhibitory/non-telencephalic neurons	809	0.693449	GSM5887654
2178	B1	GSE196521	h1930001	CA1C-CA2C-CA3C-DGC-CA4C	HIP	5	HIP	5	Vip	Vip_4	Vip	11	Inhibitory/non-telencephalic neurons	1189	0.672834	GSM5887742
2179	B1	GSE196521	h1930001	CA1C-CA2C-CA3C-DGC-CA4C	HIP	5	HIP	5	Vip	Vip_8	Vip	11	Inhibitory/non-telencephalic neurons	1023	0.688172	GSM5887751
2180	B1	GSE196521	h1930001	CA1C-CA2C-CA3C-DGC-CA4C	HIP	5	HIP	5	Vip	Vip_2	Vip	11	Inhibitory/non-telencephalic neurons	1232	0.587256	GSM5887917
2181	B1	GSE196521	h1930001	CA1C-CA2C-CA3C-DGC-CA4C	HIP	5	HIP	5	Vip	Vip_4	Vip	11	Inhibitory/non-telencephalic neurons	1157	0.537597	GSM5888175
2184	B1	GSE196521	h1930001	CA1C-CA2C-CA3C-DGC-CA4C	HIP	5	HIP	5	ASC	ASC_2	NN	20.1	Non-neuronal Cells	847	0.538371	GSM5887710
2185	B1	GSE196521	h1930001	CA1C-CA2C-CA3C-DGC-CA4C	HIP	5	HIP	5	ASC	ASC_0	NN	20.1	Non-neuronal Cells	946	0.595137	GSM5887769
2186	B1	GSE196521	h1930001	CA1C-CA2C-CA3C-DGC-CA4C	HIP	5	HIP	5	ASC	ASC_0	NN	20.1	Non-neuronal Cells	901	0.607103	GSM5887818
2190	B1	GSE196521	h1930001	CA1C-CA2C-CA3C-DGC-CA4C	HIP	5	HIP	5	MGC	MGC_0	NN	20	Non-neuronal Cells	2950	0.636384	GSM5887247
2191	B1	GSE196521	h1930001	CA1C-CA2C-CA3C-DGC-CA4C	HIP	5	HIP	5	MGC	MGC_0	NN	20	Non-neuronal Cells	923	0.71831	GSM5887800
2192	B1	GSE196521	h1930001	CA1C-CA2C-CA3C-DGC-CA4C	HIP	5	HIP	5	MGC	MGC_0	NN	20	Non-neuronal Cells	825	0.589091	GSM5887810
2193	B1	GSE196521	h1930001	CA1C-CA2C-CA3C-DGC-CA4C	HIP	5	HIP	5	MGC	MGC_0	NN	20	Non-neuronal Cells	1683	0.634185	GSM5887826
2194	B1	GSE196521	h1930001	CA1C-CA2C-CA3C-DGC-CA4C	HIP	5	HIP	5	ODC	ODC_0	NN	20.3	Non-neuronal Cells	853	0.502931	GSM5886438
2196	B1	GSE196521	h1930001	CA1C-CA2C-CA3C-DGC-CA4C	HIP	5	HIP	5	ODC	ODC_1	NN	20.3	Non-neuronal Cells	800	0.56	GSM5886458
2197	B1	GSE196521	h1930001	CA1C-CA2C-CA3C-DGC-CA4C	HIP	5	HIP	5	ODC	ODC_1	NN	20.3	Non-neuronal Cells	811	0.516646	GSM5886461
2202	B1	GSE196521	h1930001	CA1C-CA2C-CA3C-DGC-CA4C	HIP	5	HIP	5	ODC	ODC_1	NN	20.3	Non-neuronal Cells	856	0.467874	GSM5887787
2203	B1	GSE196521	h1930001	CA1C-CA2C-CA3C-DGC-CA4C	HIP	5	HIP	5	ODC	ODC_0	NN	20.3	Non-neuronal Cells	882	0.468254	GSM5887794
2204	B1	GSE196521	h1930001	CA1C-CA2C-CA3C-DGC-CA4C	HIP	5	HIP	5	ODC	ODC_1	NN	20.3	Non-neuronal Cells	945	0.479365	GSM5887799
2205	B1	GSE196521	h1930001	CA1C-CA2C-CA3C-DGC-CA4C	HIP	5	HIP	5	ODC	ODC_1	NN	20.3	Non-neuronal Cells	943	0.507953	GSM5887806
2207	B1	GSE196521	h1930001	CA1C-CA2C-CA3C-DGC-CA4C	HIP	5	HIP	5	ODC	ODC_1	NN	20.3	Non-neuronal Cells	817	0.482252	GSM5887825
2209	B1	GSE196521	h1930001	CA1C-CA2C-CA3C-DGC-CA4C	HIP	5	HIP	5	ODC	ODC_0	NN	20.3	Non-neuronal Cells	1126	0.523091	GSM5888154
2211	B1	GSE196521	h1930001	CA1C-CA2C-CA3C-DGC-CA4C	HIP	5	HIP	5	ODC	ODC_1	NN	20.3	Non-neuronal Cells	3101	0.561701	GSM5888245
2212	B1	GSE196521	h1930001	CA1C-CA2C-CA3C-DGC-CA4C	HIP	5	HIP	5	OPC	OPC_0	NN	20.2	Non-neuronal Cells	896	0.523438	GSM5887814
2213	B1	GSE196521	h1930001	CA1C-CA2C-CA3C-DGC-CA4C	HIP	5	HIP	5	PC	PC_0	NN	20	Non-neuronal Cells	1814	0.587652	GSM5886202
2214	B1	GSE196521	h1930001	CA1C-CA2C-CA3C-DGC-CA4C	HIP	5	HIP	5	VLMC	VLMC_0	NN	20	Non-neuronal Cells	848	0.642689	GSM5886816
2216	B1	GSE196521	h1930001	CA1C-CA2C-CA3C-DGC-CA4C	HIP	5	HIP	5	CA1	CA1_4	CA	16	Telencephalic excitatory neurons	894	0.464206	GSM5886230
2222	B1	GSE196521	h1930001	CA1C-CA2C-CA3C-DGC-CA4C	HIP	5	HIP	5	CA1	CA1_1	CA	16	Telencephalic excitatory neurons	1034	0.424565	GSM5887671
2223	B1	GSE196521	h1930001	CA1C-CA2C-CA3C-DGC-CA4C	HIP	5	HIP	5	CA1	CA1_2	CA	16	Telencephalic excitatory neurons	951	0.355415	GSM5887676
2224	B1	GSE196521	h1930001	CA1C-CA2C-CA3C-DGC-CA4C	HIP	5	HIP	5	CA1	CA1_0	CA	16	Telencephalic excitatory neurons	981	0.46789	GSM5887700
2226	B1	GSE196521	h1930001	CA1C-CA2C-CA3C-DGC-CA4C	HIP	5	HIP	5	CA1	CA1_0	CA	16	Telencephalic excitatory neurons	1018	0.441061	GSM5887728
2227	B1	GSE196521	h1930001	CA1C-CA2C-CA3C-DGC-CA4C	HIP	5	HIP	5	CA1	CA1_2	CA	16	Telencephalic excitatory neurons	929	0.452099	GSM5887737
2228	B1	GSE196521	h1930001	CA1C-CA2C-CA3C-DGC-CA4C	HIP	5	HIP	5	CA1	CA1_2	CA	16	Telencephalic excitatory neurons	1065	0.426291	GSM5887755
2229	B1	GSE196521	h1930001	CA1C-CA2C-CA3C-DGC-CA4C	HIP	5	HIP	5	CA1	CA1_2	CA	16	Telencephalic excitatory neurons	1132	0.396643	GSM5887761
2230	B1	GSE196521	h1930001	CA1C-CA2C-CA3C-DGC-CA4C	HIP	5	HIP	5	CA1	CA1_2	CA	16	Telencephalic excitatory neurons	1133	0.553839	GSM5888207
2233	B1	GSE196521	h1930001	CA1C-CA2C-CA3C-DGC-CA4C	HIP	5	HIP	5	DG	DG_0	DG	17	Telencephalic excitatory neurons	783	0.399106	GSM5885863
2243	B1	GSE196521	h1930001	CA1C-CA2C-CA3C-DGC-CA4C	HIP	5	HIP	5	DG	DG_0	DG	17	Telencephalic excitatory neurons	886	0.399549	GSM5886214
2244	B1	GSE196521	h1930001	CA1C-CA2C-CA3C-DGC-CA4C	HIP	5	HIP	5	DG	DG_0	DG	17	Telencephalic excitatory neurons	887	0.418264	GSM5886228
2245	B1	GSE196521	h1930001	CA1C-CA2C-CA3C-DGC-CA4C	HIP	5	HIP	5	DG	DG_0	DG	17	Telencephalic excitatory neurons	942	0.415074	GSM5886232
2246	B1	GSE196521	h1930001	CA1C-CA2C-CA3C-DGC-CA4C	HIP	5	HIP	5	DG	DG_0	DG	17	Telencephalic excitatory neurons	843	0.450771	GSM5886238
2248	B1	GSE196521	h1930001	CA1C-CA2C-CA3C-DGC-CA4C	HIP	5	HIP	5	DG	DG_0	DG	17	Telencephalic excitatory neurons	883	0.412231	GSM5886275
2257	B1	GSE196521	h1930001	CA1C-CA2C-CA3C-DGC-CA4C	HIP	5	HIP	5	DG	DG_0	DG	17	Telencephalic excitatory neurons	864	0.447917	GSM5886397
2258	B1	GSE196521	h1930001	CA1C-CA2C-CA3C-DGC-CA4C	HIP	5	HIP	5	DG	DG_0	DG	17	Telencephalic excitatory neurons	879	0.444824	GSM5886400
2262	B1	GSE196521	h1930001	CA1C-CA2C-CA3C-DGC-CA4C	HIP	5	HIP	5	DG	DG_0	DG	17	Telencephalic excitatory neurons	1321	0.442468	GSM5886669
2264	B1	GSE196521	h1930001	CA1C-CA2C-CA3C-DGC-CA4C	HIP	5	HIP	5	DG	DG_0	DG	17	Telencephalic excitatory neurons	843	0.493476	GSM5886754
2267	B1	GSE196521	h1930001	CA1C-CA2C-CA3C-DGC-CA4C	HIP	5	HIP	5	DG	DG_0	DG	17	Telencephalic excitatory neurons	1233	0.515004	GSM5886888
2270	B1	GSE196521	h1930001	CA1C-CA2C-CA3C-DGC-CA4C	HIP	5	HIP	5	DG	DG_0	DG	17	Telencephalic excitatory neurons	854	0.422717	GSM5887067
2272	B1	GSE196521	h1930001	CA1C-CA2C-CA3C-DGC-CA4C	HIP	5	HIP	5	DG	DG_0	DG	17	Telencephalic excitatory neurons	898	0.420935	GSM5887083
2273	B1	GSE196521	h1930001	CA1C-CA2C-CA3C-DGC-CA4C	HIP	5	HIP	5	DG	DG_0	DG	17	Telencephalic excitatory neurons	1469	0.412526	GSM5887091
2281	B1	GSE196521	h1930001	CA1C-CA2C-CA3C-DGC-CA4C	HIP	5	HIP	5	DG	DG_0	DG	17	Telencephalic excitatory neurons	801	0.478152	GSM5887383
2286	B1	GSE196521	h1930001	CA1C-CA2C-CA3C-DGC-CA4C	HIP	5	HIP	5	DG	DG_0	DG	17	Telencephalic excitatory neurons	849	0.369847	GSM5887430
2290	B1	GSE196521	h1930001	CA1C-CA2C-CA3C-DGC-CA4C	HIP	5	HIP	5	DG	DG_0	DG	17	Telencephalic excitatory neurons	924	0.438312	GSM5887469
2291	B1	GSE196521	h1930001	CA1C-CA2C-CA3C-DGC-CA4C	HIP	5	HIP	5	DG	DG_0	DG	17	Telencephalic excitatory neurons	889	0.505062	GSM5887549
2292	B1	GSE196521	h1930001	CA1C-CA2C-CA3C-DGC-CA4C	HIP	5	HIP	5	DG	DG_0	DG	17	Telencephalic excitatory neurons	952	0.412815	GSM5887554
2293	B1	GSE196521	h1930001	CA1C-CA2C-CA3C-DGC-CA4C	HIP	5	HIP	5	DG	DG_0	DG	17	Telencephalic excitatory neurons	954	0.462264	GSM5887558
2294	B1	GSE196521	h1930001	CA1C-CA2C-CA3C-DGC-CA4C	HIP	5	HIP	5	DG	DG_0	DG	17	Telencephalic excitatory neurons	908	0.44163	GSM5887564
2295	B1	GSE196521	h1930001	CA1C-CA2C-CA3C-DGC-CA4C	HIP	5	HIP	5	DG	DG_0	DG	17	Telencephalic excitatory neurons	963	0.412253	GSM5887566
2298	B1	GSE196521	h1930001	CA1C-CA2C-CA3C-DGC-CA4C	HIP	5	HIP	5	DG	DG_0	DG	17	Telencephalic excitatory neurons	910	0.402198	GSM5887613
2301	B1	GSE196521	h1930001	CA1C-CA2C-CA3C-DGC-CA4C	HIP	5	HIP	5	DG	DG_0	DG	17	Telencephalic excitatory neurons	814	0.402948	GSM5887620
2302	B1	GSE196521	h1930001	CA1C-CA2C-CA3C-DGC-CA4C	HIP	5	HIP	5	DG	DG_0	DG	17	Telencephalic excitatory neurons	797	0.437892	GSM5887632
2303	B1	GSE196521	h1930001	CA1C-CA2C-CA3C-DGC-CA4C	HIP	5	HIP	5	DG	DG_0	DG	17	Telencephalic excitatory neurons	827	0.437727	GSM5887636
2304	B1	GSE196521	h1930001	CA1C-CA2C-CA3C-DGC-CA4C	HIP	5	HIP	5	DG	DG_0	DG	17	Telencephalic excitatory neurons	997	0.428285	GSM5887668
2305	B1	GSE196521	h1930001	CA1C-CA2C-CA3C-DGC-CA4C	HIP	5	HIP	5	DG	DG_0	DG	17	Telencephalic excitatory neurons	977	0.394063	GSM5887693
2306	B1	GSE196521	h1930001	CA1C-CA2C-CA3C-DGC-CA4C	HIP	5	HIP	5	DG	DG_0	DG	17	Telencephalic excitatory neurons	932	0.465665	GSM5887694
2308	B1	GSE196521	h1930001	CA1C-CA2C-CA3C-DGC-CA4C	HIP	5	HIP	5	DG	DG_0	DG	17	Telencephalic excitatory neurons	1128	0.452128	GSM5887723
2309	B1	GSE196521	h1930001	CA1C-CA2C-CA3C-DGC-CA4C	HIP	5	HIP	5	DG	DG_0	DG	17	Telencephalic excitatory neurons	965	0.421762	GSM5887726
2310	B1	GSE196521	h1930001	CA1C-CA2C-CA3C-DGC-CA4C	HIP	5	HIP	5	DG	DG_0	DG	17	Telencephalic excitatory neurons	878	0.414579	GSM5887748
2311	B1	GSE196521	h1930001	CA1C-CA2C-CA3C-DGC-CA4C	HIP	5	HIP	5	DG	DG_0	DG	17	Telencephalic excitatory neurons	951	0.425868	GSM5887765
2312	B1	GSE196521	h1930001	CA1C-CA2C-CA3C-DGC-CA4C	HIP	5	HIP	5	DG	DG_0	DG	17	Telencephalic excitatory neurons	958	0.429019	GSM5887771
2313	B1	GSE196521	h1930001	CA1C-CA2C-CA3C-DGC-CA4C	HIP	5	HIP	5	DG	DG_0	DG	17	Telencephalic excitatory neurons	833	0.404562	GSM5887773
2314	B1	GSE196521	h1930001	CA1C-CA2C-CA3C-DGC-CA4C	HIP	5	HIP	5	DG	DG_0	DG	17	Telencephalic excitatory neurons	934	0.422912	GSM5887774
2315	B1	GSE196521	h1930001	CA1C-CA2C-CA3C-DGC-CA4C	HIP	5	HIP	5	DG	DG_0	DG	17	Telencephalic excitatory neurons	1141	0.475022	GSM5887779
2317	B1	GSE196521	h1930001	CA1C-CA2C-CA3C-DGC-CA4C	HIP	5	HIP	5	DG	DG_0	DG	17	Telencephalic excitatory neurons	1104	0.473279	GSM5887792
2318	B1	GSE196521	h1930001	CA1C-CA2C-CA3C-DGC-CA4C	HIP	5	HIP	5	DG	DG_0	DG	17	Telencephalic excitatory neurons	900	0.555	GSM5887828
2326	B1	GSE196521	h1930001	CA1C-CA2C-CA3C-DGC-CA4C	HIP	5	HIP	5	DG	DG_0	DG	17	Telencephalic excitatory neurons	852	0.446009	GSM5888307
2327	B1	GSE196521	h1930001	CA1C-CA2C-CA3C-DGC-CA4C	HIP	5	HIP	5	DG	DG_0	DG	17	Telencephalic excitatory neurons	867	0.482122	GSM5888322
2328	B1	GSE196521	h1930001	CA1C-CA2C-CA3C-DGC-CA4C	HIP	5	HIP	5	DG	DG_0	DG	17	Telencephalic excitatory neurons	854	0.477166	GSM5888351
2334	B1	GSE196521	h1930001	CA1C-CA2C-CA3C-DGC-CA4C	HIP	5	HIP	5	HIP-Misc1	HIP_Misc1_0	HIP-Misc	15	Telencephalic excitatory neurons	819	0.599512	GSM5886208
2335	B1	GSE196521	h1930001	CA1C-CA2C-CA3C-DGC-CA4C	HIP	5	HIP	5	HIP-Misc1	HIP_Misc1_0	HIP-Misc	15	Telencephalic excitatory neurons	990	0.530808	GSM5886211
2336	B1	GSE196521	h1930001	CA1C-CA2C-CA3C-DGC-CA4C	HIP	5	HIP	5	HIP-Misc1	HIP_Misc1_0	HIP-Misc	15	Telencephalic excitatory neurons	842	0.606888	GSM5886282
2338	B1	GSE196521	h1930001	CA1C-CA2C-CA3C-DGC-CA4C	HIP	5	HIP	5	HIP-Misc1	HIP_Misc1_0	HIP-Misc	15	Telencephalic excitatory neurons	822	0.594891	GSM5886329
2339	B1	GSE196521	h1930001	CA1C-CA2C-CA3C-DGC-CA4C	HIP	5	HIP	5	HIP-Misc1	HIP_Misc1_0	HIP-Misc	15	Telencephalic excitatory neurons	886	0.588036	GSM5886339
2340	B1	GSE196521	h1930001	CA1C-CA2C-CA3C-DGC-CA4C	HIP	5	HIP	5	HIP-Misc1	HIP_Misc1_0	HIP-Misc	15	Telencephalic excitatory neurons	826	0.552058	GSM5886432
2348	B1	GSE196521	h1930001	CA1C-CA2C-CA3C-DGC-CA4C	HIP	5	HIP	5	HIP-Misc1	HIP_Misc1_0	HIP-Misc	15	Telencephalic excitatory neurons	946	0.561311	GSM5887550
2350	B1	GSE196521	h1930001	CA1C-CA2C-CA3C-DGC-CA4C	HIP	5	HIP	5	HIP-Misc1	HIP_Misc1_0	HIP-Misc	15	Telencephalic excitatory neurons	904	0.504425	GSM5887705
2351	B1	GSE196521	h1930001	CA1C-CA2C-CA3C-DGC-CA4C	HIP	5	HIP	5	HIP-Misc1	HIP_Misc1_0	HIP-Misc	15	Telencephalic excitatory neurons	969	0.581011	GSM5887766
2352	B1	GSE196521	h1930001	CA1C-CA2C-CA3C-DGC-CA4C	HIP	5	HIP	5	HIP-Misc1	HIP_Misc1_0	HIP-Misc	15	Telencephalic excitatory neurons	1021	0.576885	GSM5887785
2353	B1	GSE196521	h1930001	CA1C-CA2C-CA3C-DGC-CA4C	HIP	5	HIP	5	HIP-Misc1	HIP_Misc1_0	HIP-Misc	15	Telencephalic excitatory neurons	920	0.61413	GSM5887809
2354	B1	GSE196521	h1930001	CA1C-CA2C-CA3C-DGC-CA4C	HIP	5	HIP	5	HIP-Misc1	HIP_Misc1_0	HIP-Misc	15	Telencephalic excitatory neurons	889	0.590551	GSM5887827
2362	B1	GSE196521	h1930001	CA1C-CA2C-CA3C-DGC-CA4C	HIP	5	HIP	5	HIP-Misc2	HIP_Misc2_0	HIP-Misc	15	Telencephalic excitatory neurons	929	0.568353	GSM5886219
2367	B1	GSE196521	h1930001	CA1C-CA2C-CA3C-DGC-CA4C	HIP	5	HIP	5	HIP-Misc2	HIP_Misc2_0	HIP-Misc	15	Telencephalic excitatory neurons	817	0.626683	GSM5886328
2370	B1	GSE196521	h1930001	CA1C-CA2C-CA3C-DGC-CA4C	HIP	5	HIP	5	HIP-Misc2	HIP_Misc2_2	HIP-Misc	15	Telencephalic excitatory neurons	839	0.54708	GSM5886403
2371	B1	GSE196521	h1930001	CA1C-CA2C-CA3C-DGC-CA4C	HIP	5	HIP	5	HIP-Misc2	HIP_Misc2_1	HIP-Misc	15	Telencephalic excitatory neurons	825	0.627879	GSM5886406
2373	B1	GSE196521	h1930001	CA1C-CA2C-CA3C-DGC-CA4C	HIP	5	HIP	5	HIP-Misc2	HIP_Misc2_1	HIP-Misc	15	Telencephalic excitatory neurons	1114	0.576302	GSM5886498
2382	B1	GSE196521	h1930001	CA1C-CA2C-CA3C-DGC-CA4C	HIP	5	HIP	5	HIP-Misc2	HIP_Misc2_2	HIP-Misc	15	Telencephalic excitatory neurons	1037	0.618611	GSM5887265
2385	B1	GSE196521	h1930001	CA1C-CA2C-CA3C-DGC-CA4C	HIP	5	HIP	5	HIP-Misc2	HIP_Misc2_2	HIP-Misc	15	Telencephalic excitatory neurons	879	0.622298	GSM5887417
2387	B1	GSE196521	h1930001	CA1C-CA2C-CA3C-DGC-CA4C	HIP	5	HIP	5	HIP-Misc2	HIP_Misc2_2	HIP-Misc	15	Telencephalic excitatory neurons	965	0.630052	GSM5887561
2388	B1	GSE196521	h1930001	CA1C-CA2C-CA3C-DGC-CA4C	HIP	5	HIP	5	HIP-Misc2	HIP_Misc2_0	HIP-Misc	15	Telencephalic excitatory neurons	898	0.648107	GSM5887571
2389	B1	GSE196521	h1930001	CA1C-CA2C-CA3C-DGC-CA4C	HIP	5	HIP	5	HIP-Misc2	HIP_Misc2_0	HIP-Misc	15	Telencephalic excitatory neurons	881	0.648127	GSM5887584
2390	B1	GSE196521	h1930001	CA1C-CA2C-CA3C-DGC-CA4C	HIP	5	HIP	5	HIP-Misc2	HIP_Misc2_2	HIP-Misc	15	Telencephalic excitatory neurons	945	0.596825	GSM5887594
2392	B1	GSE196521	h1930001	CA1C-CA2C-CA3C-DGC-CA4C	HIP	5	HIP	5	HIP-Misc2	HIP_Misc2_0	HIP-Misc	15	Telencephalic excitatory neurons	817	0.659731	GSM5887662
2393	B1	GSE196521	h1930001	CA1C-CA2C-CA3C-DGC-CA4C	HIP	5	HIP	5	HIP-Misc2	HIP_Misc2_0	HIP-Misc	15	Telencephalic excitatory neurons	921	0.648208	GSM5887688
2395	B1	GSE196521	h1930001	CA1C-CA2C-CA3C-DGC-CA4C	HIP	5	HIP	5	HIP-Misc2	HIP_Misc2_2	HIP-Misc	15	Telencephalic excitatory neurons	853	0.541618	GSM5887711
2396	B1	GSE196521	h1930001	CA1C-CA2C-CA3C-DGC-CA4C	HIP	5	HIP	5	HIP-Misc2	HIP_Misc2_2	HIP-Misc	15	Telencephalic excitatory neurons	893	0.658455	GSM5887712
2397	B1	GSE196521	h1930001	CA1C-CA2C-CA3C-DGC-CA4C	HIP	5	HIP	5	HIP-Misc2	HIP_Misc2_2	HIP-Misc	15	Telencephalic excitatory neurons	920	0.567391	GSM5887733
2398	B1	GSE196521	h1930001	CA1C-CA2C-CA3C-DGC-CA4C	HIP	5	HIP	5	HIP-Misc2	HIP_Misc2_2	HIP-Misc	15	Telencephalic excitatory neurons	1633	0.612166	GSM5887764
2399	B1	GSE196521	h1930001	CA1C-CA2C-CA3C-DGC-CA4C	HIP	5	HIP	5	HIP-Misc2	HIP_Misc2_2	HIP-Misc	15	Telencephalic excitatory neurons	1157	0.570441	GSM5887768
2400	B1	GSE196521	h1930001	CA1C-CA2C-CA3C-DGC-CA4C	HIP	5	HIP	5	HIP-Misc2	HIP_Misc2_1	HIP-Misc	15	Telencephalic excitatory neurons	1082	0.631701	GSM5887991
2405	B1	GSE196521	h1930001	CA1C-CA2C-CA3C-DGC-CA4C	HIP	5	HIP	5	HIP-Misc2	HIP_Misc2_0	HIP-Misc	15	Telencephalic excitatory neurons	1707	0.534173	GSM5888256
2407	B1	GSE196521	h1930001	CA1C-CA2C-CA3C-DGC-CA4C	HIP	5	HIP	5	HIP-Misc2	HIP_Misc2_2	HIP-Misc	15	Telencephalic excitatory neurons	911	0.641603	GSM5888294
2410	B1	GSE196521	h1930001	CA1C-CA2C-CA3C-DGC-CA4C	HIP	5	HIP	5	HIP-Misc2	HIP_Misc2_2	HIP-Misc	15	Telencephalic excitatory neurons	1497	0.645291	GSM5888512
2416	B1	GSE196521	h1930001	CA1C-CA2C-CA3C-DGC-CA4C	HIP	5	HIP	5	L2/3-IT	L23_IT_1	L2/3-IT	19	Telencephalic excitatory neurons	1397	0.466953	GSM5886192
2418	B1	GSE196521	h1930001	CA1C-CA2C-CA3C-DGC-CA4C	HIP	5	HIP	5	L2/3-IT	L23_IT_1	L2/3-IT	19	Telencephalic excitatory neurons	886	0.446953	GSM5886225
2422	B1	GSE196521	h1930001	CA1C-CA2C-CA3C-DGC-CA4C	HIP	5	HIP	5	L2/3-IT	L23_IT_1	L2/3-IT	19	Telencephalic excitatory neurons	866	0.540993	GSM5886343
2426	B1	GSE196521	h1930001	CA1C-CA2C-CA3C-DGC-CA4C	HIP	5	HIP	5	L2/3-IT	L23_IT_5	L2/3-IT	19	Telencephalic excitatory neurons	818	0.502445	GSM5887378
2429	B1	GSE196521	h1930001	CA1C-CA2C-CA3C-DGC-CA4C	HIP	5	HIP	5	L2/3-IT	L23_IT_10	L2/3-IT	19	Telencephalic excitatory neurons	851	0.415981	GSM5887555
2430	B1	GSE196521	h1930001	CA1C-CA2C-CA3C-DGC-CA4C	HIP	5	HIP	5	L2/3-IT	L23_IT_12	L2/3-IT	19	Telencephalic excitatory neurons	818	0.440098	GSM5887559
2431	B1	GSE196521	h1930001	CA1C-CA2C-CA3C-DGC-CA4C	HIP	5	HIP	5	L2/3-IT	L23_IT_10	L2/3-IT	19	Telencephalic excitatory neurons	942	0.446391	GSM5887583
2434	B1	GSE196521	h1930001	CA1C-CA2C-CA3C-DGC-CA4C	HIP	5	HIP	5	L2/3-IT	L23_IT_0	L2/3-IT	19	Telencephalic excitatory neurons	899	0.484983	GSM5887682
2435	B1	GSE196521	h1930001	CA1C-CA2C-CA3C-DGC-CA4C	HIP	5	HIP	5	L2/3-IT	L23_IT_1	L2/3-IT	19	Telencephalic excitatory neurons	890	0.503371	GSM5887685
2436	B1	GSE196521	h1930001	CA1C-CA2C-CA3C-DGC-CA4C	HIP	5	HIP	5	L2/3-IT	L23_IT_0	L2/3-IT	19	Telencephalic excitatory neurons	978	0.47546	GSM5887760
2437	B1	GSE196521	h1930001	CA1C-CA2C-CA3C-DGC-CA4C	HIP	5	HIP	5	L2/3-IT	L23_IT_10	L2/3-IT	19	Telencephalic excitatory neurons	940	0.51383	GSM5887788
2438	B1	GSE196521	h1930001	CA1C-CA2C-CA3C-DGC-CA4C	HIP	5	HIP	5	L2/3-IT	L23_IT_10	L2/3-IT	19	Telencephalic excitatory neurons	949	0.425711	GSM5887798
2443	B1	GSE196521	h1930001	CA1C-CA2C-CA3C-DGC-CA4C	HIP	5	HIP	5	L4-IT	L4_IT_5	L4_6	18	Telencephalic excitatory neurons	959	0.54536	GSM5886205
2445	B1	GSE196521	h1930001	CA1C-CA2C-CA3C-DGC-CA4C	HIP	5	HIP	5	L4-IT	L4_IT_3	L4_6	18	Telencephalic excitatory neurons	811	0.496917	GSM5886460
2450	B1	GSE196521	h1930001	CA1C-CA2C-CA3C-DGC-CA4C	HIP	5	HIP	5	L4-IT	L4_IT_3	L4_6	18	Telencephalic excitatory neurons	828	0.576087	GSM5887052
2454	B1	GSE196521	h1930001	CA1C-CA2C-CA3C-DGC-CA4C	HIP	5	HIP	5	L4-IT	L4_IT_5	L4_6	18	Telencephalic excitatory neurons	1084	0.570111	GSM5887721
2456	B1	GSE196521	h1930001	CA1C-CA2C-CA3C-DGC-CA4C	HIP	5	HIP	5	L4-IT	L4_IT_3	L4_6	18	Telencephalic excitatory neurons	925	0.501261	GSM5887749
2457	B1	GSE196521	h1930001	CA1C-CA2C-CA3C-DGC-CA4C	HIP	5	HIP	5	L4-IT	L4_IT_5	L4_6	18	Telencephalic excitatory neurons	928	0.520474	GSM5887823
2458	B1	GSE196521	h1930001	CA1C-CA2C-CA3C-DGC-CA4C	HIP	5	HIP	5	L4-IT	L4_IT_1	L4_6	18	Telencephalic excitatory neurons	808	0.608911	GSM5888230
2463	B1	GSE196521	h1930001	CA1C-CA2C-CA3C-DGC-CA4C	HIP	5	HIP	5	L5-IT	L5_IT_4	L4_6	18	Telencephalic excitatory neurons	819	0.495726	GSM5886112
2468	B1	GSE196521	h1930001	CA1C-CA2C-CA3C-DGC-CA4C	HIP	5	HIP	5	L5-IT	L5_IT_3	L4_6	18	Telencephalic excitatory neurons	941	0.51966	GSM5886393
2469	B1	GSE196521	h1930001	CA1C-CA2C-CA3C-DGC-CA4C	HIP	5	HIP	5	L5-IT	L45_IT_2	L4_6	18	Telencephalic excitatory neurons	824	0.645631	GSM5886794
2470	B1	GSE196521	h1930001	CA1C-CA2C-CA3C-DGC-CA4C	HIP	5	HIP	5	L5-IT	L5_IT_0	L4_6	18	Telencephalic excitatory neurons	956	0.735356	GSM5886868
2473	B1	GSE196521	h1930001	CA1C-CA2C-CA3C-DGC-CA4C	HIP	5	HIP	5	L5-IT	L5_IT_2	L4_6	18	Telencephalic excitatory neurons	836	0.501196	GSM5887547
2474	B1	GSE196521	h1930001	CA1C-CA2C-CA3C-DGC-CA4C	HIP	5	HIP	5	L5-IT	L45_IT_0	L4_6	18	Telencephalic excitatory neurons	1025	0.66439	GSM5887591
2475	B1	GSE196521	h1930001	CA1C-CA2C-CA3C-DGC-CA4C	HIP	5	HIP	5	L5-IT	L5_IT_3	L4_6	18	Telencephalic excitatory neurons	834	0.514388	GSM5887592
2477	B1	GSE196521	h1930001	CA1C-CA2C-CA3C-DGC-CA4C	HIP	5	HIP	5	L5-IT	L5_IT_4	L4_6	18	Telencephalic excitatory neurons	1088	0.475184	GSM5887750
2478	B1	GSE196521	h1930001	CA1C-CA2C-CA3C-DGC-CA4C	HIP	5	HIP	5	L5-IT	L5_IT_0	L4_6	18	Telencephalic excitatory neurons	874	0.715103	GSM5887808
2482	B1	GSE196521	h1930001	CA1C-CA2C-CA3C-DGC-CA4C	HIP	5	HIP	5	L6b	L6b_2	L4_6	18	Telencephalic excitatory neurons	958	0.699374	GSM5886377
2486	B1	GSE196521	h1930001	CA1C-CA2C-CA3C-DGC-CA4C	HIP	5	HIP	5	L6b	L6b_0	L4_6	18	Telencephalic excitatory neurons	870	0.515517	GSM5887567
2487	B1	GSE196521	h1930001	CA1C-CA2C-CA3C-DGC-CA4C	HIP	5	HIP	5	L6b	L6b_4	L4_6	18	Telencephalic excitatory neurons	930	0.765591	GSM5887589
2488	B1	GSE196521	h1930001	CA1C-CA2C-CA3C-DGC-CA4C	HIP	5	HIP	5	L6b	L6b_4	L4_6	18	Telencephalic excitatory neurons	831	0.618532	GSM5887608
2489	B1	GSE196521	h1930001	CA1C-CA2C-CA3C-DGC-CA4C	HIP	5	HIP	5	L6b	L6b_0	L4_6	18	Telencephalic excitatory neurons	1756	0.568527	GSM5887679
2490	B1	GSE196521	h1930001	CA1C-CA2C-CA3C-DGC-CA4C	HIP	5	HIP	5	L6b	L6b_0	L4_6	18	Telencephalic excitatory neurons	850	0.578824	GSM5887684
2492	B1	GSE196521	h1930001	CA1C-CA2C-CA3C-DGC-CA4C	HIP	5	HIP	5	L6b	L6b_3	L4_6	18	Telencephalic excitatory neurons	928	0.735991	GSM5888325
2495	B1	GSE196521	h1930001	CA1C-CA2C-CA3C-DGC-CA4C	HIP	5	HIP	5	L6-CT	L6_CT_2	L4_6	18	Telencephalic excitatory neurons	817	0.53978	GSM5885868
2499	B1	GSE196521	h1930001	CA1C-CA2C-CA3C-DGC-CA4C	HIP	5	HIP	5	L6-CT	L6_CT_3	L4_6	18	Telencephalic excitatory neurons	840	0.697619	GSM5886265
2501	B1	GSE196521	h1930001	CA1C-CA2C-CA3C-DGC-CA4C	HIP	5	HIP	5	L6-CT	L6_CT_0	L4_6	18	Telencephalic excitatory neurons	852	0.58216	GSM5886369
2509	B1	GSE196521	h1930001	CA1C-CA2C-CA3C-DGC-CA4C	HIP	5	HIP	5	L6-CT	L6_CT_0	L4_6	18	Telencephalic excitatory neurons	851	0.748531	GSM5887024
2513	B1	GSE196521	h1930001	CA1C-CA2C-CA3C-DGC-CA4C	HIP	5	HIP	5	L6-CT	L6_CT_3	L4_6	18	Telencephalic excitatory neurons	836	0.686603	GSM5887134
2518	B1	GSE196521	h1930001	CA1C-CA2C-CA3C-DGC-CA4C	HIP	5	HIP	5	L6-CT	L6_CT_0	L4_6	18	Telencephalic excitatory neurons	844	0.566351	GSM5887627
2519	B1	GSE196521	h1930001	CA1C-CA2C-CA3C-DGC-CA4C	HIP	5	HIP	5	L6-CT	L6_CT_3	L4_6	18	Telencephalic excitatory neurons	882	0.714286	GSM5887643
2520	B1	GSE196521	h1930001	CA1C-CA2C-CA3C-DGC-CA4C	HIP	5	HIP	5	L6-CT	L6_CT_2	L4_6	18	Telencephalic excitatory neurons	905	0.634254	GSM5887659
2522	B1	GSE196521	h1930001	CA1C-CA2C-CA3C-DGC-CA4C	HIP	5	HIP	5	L6-CT	L6_CT_2	L4_6	18	Telencephalic excitatory neurons	919	0.649619	GSM5887702
2523	B1	GSE196521	h1930001	CA1C-CA2C-CA3C-DGC-CA4C	HIP	5	HIP	5	L6-CT	L6_CT_2	L4_6	18	Telencephalic excitatory neurons	913	0.58598	GSM5887713
2524	B1	GSE196521	h1930001	CA1C-CA2C-CA3C-DGC-CA4C	HIP	5	HIP	5	L6-CT	L6_CT_0	L4_6	18	Telencephalic excitatory neurons	1133	0.542807	GSM5887729
2525	B1	GSE196521	h1930001	CA1C-CA2C-CA3C-DGC-CA4C	HIP	5	HIP	5	L6-CT	L6_CT_3	L4_6	18	Telencephalic excitatory neurons	953	0.715635	GSM5887784
2530	B1	GSE196521	h1930001	CA1C-CA2C-CA3C-DGC-CA4C	HIP	5	HIP	5	L6-CT	L6_CT_0	L4_6	18	Telencephalic excitatory neurons	855	0.538012	GSM5888350
2531	B1	GSE196521	h1930001	CA1C-CA2C-CA3C-DGC-CA4C	HIP	5	HIP	5	L6-CT	L6_CT_0	L4_6	18	Telencephalic excitatory neurons	1070	0.620561	GSM5888371
2533	B1	GSE196521	h1930001	CA1C-CA2C-CA3C-DGC-CA4C	HIP	5	HIP	5	L6-IT	L6_IT_4	L4_6	18	Telencephalic excitatory neurons	864	0.534722	GSM5886286
2534	B1	GSE196521	h1930001	CA1C-CA2C-CA3C-DGC-CA4C	HIP	5	HIP	5	L6-IT	L6_IT_4	L4_6	18	Telencephalic excitatory neurons	821	0.525579	GSM5886402
2537	B1	GSE196521	h1930001	CA1C-CA2C-CA3C-DGC-CA4C	HIP	5	HIP	5	L6-IT	L6_IT_5	L4_6	18	Telencephalic excitatory neurons	834	0.510791	GSM5887102
2538	B1	GSE196521	h1930001	CA1C-CA2C-CA3C-DGC-CA4C	HIP	5	HIP	5	L6-IT	L6_IT_5	L4_6	18	Telencephalic excitatory neurons	1443	0.690229	GSM5887399
2539	B1	GSE196521	h1930001	CA1C-CA2C-CA3C-DGC-CA4C	HIP	5	HIP	5	L6-IT	L6_IT_5	L4_6	18	Telencephalic excitatory neurons	1301	0.584935	GSM5887974
2541	B1	GSE196521	h1930001	CA1C-CA2C-CA3C-DGC-CA4C	HIP	5	HIP	5	L6-IT	L6_IT_5	L4_6	18	Telencephalic excitatory neurons	851	0.518214	GSM5888295
2543	B2	GSE200290	h1930001	MD	BS	1			Chd7	CHD7_2	Chd7	8	Inhibitory/non-telencephalic neurons	1014	0.683432	GSM6027666
2544	B2	GSE200290	h1930001	MD	BS	1			Chd7	CHD7_0	Chd7	8	Inhibitory/non-telencephalic neurons	1075	0.613953	GSM6027672
2545	B2	GSE200290	h1930001	MD	BS	1			Chd7	CHD7_0	Chd7	8	Inhibitory/non-telencephalic neurons	1007	0.610725	GSM6027813
2546	B2	GSE200290	h1930001	MD	BS	1			Chd7	CHD7_0	Chd7	8	Inhibitory/non-telencephalic neurons	1195	0.611715	GSM6027949
2547	B2	GSE200290	h1930001	MD	BS	1			Chd7	CHD7_2	Chd7	8	Inhibitory/non-telencephalic neurons	1317	0.689446	GSM6028108
2548	B2	GSE200290	h1930001	MD	BS	1			Lamp5	Lamp5_2	Lamp5	9	Inhibitory/non-telencephalic neurons	960	0.623958	GSM6027501
2549	B2	GSE200290	h1930001	MD	BS	1			Lamp5	Lamp5_0	Lamp5	9	Inhibitory/non-telencephalic neurons	1091	0.621448	GSM6027507
2550	B2	GSE200290	h1930001	MD	BS	1			Lamp5	Lamp5_0	Lamp5	9	Inhibitory/non-telencephalic neurons	1003	0.629113	GSM6027679
2551	B2	GSE200290	h1930001	MD	BS	1			Lamp5	Lamp5_0	Lamp5	9	Inhibitory/non-telencephalic neurons	1031	0.636275	GSM6027716
2552	B2	GSE200290	h1930001	MD	BS	1			Lamp5	Lamp5_0	Lamp5	9	Inhibitory/non-telencephalic neurons	941	0.688629	GSM6027739
2553	B2	GSE200290	h1930001	MD	BS	1			Lamp5	Lamp5_0	Lamp5	9	Inhibitory/non-telencephalic neurons	1142	0.630473	GSM6027898
2554	B2	GSE200290	h1930001	MD	BS	1			Lamp5	Lamp5_0	Lamp5	9	Inhibitory/non-telencephalic neurons	923	0.644095	GSM6027928
2555	B2	GSE200290	h1930001	MD	BS	1			Lamp5	Lamp5_0	Lamp5	9	Inhibitory/non-telencephalic neurons	1051	0.631304	GSM6027958
2556	B2	GSE200290	h1930001	MD	BS	1			Lamp5	Lamp5_0	Lamp5	9	Inhibitory/non-telencephalic neurons	1232	0.628247	GSM6028009
2557	B2	GSE200290	h1930001	MD	BS	1			Lamp5	Lamp5_3	Lamp5	9	Inhibitory/non-telencephalic neurons	1137	0.620932	GSM6028025
2558	B2	GSE200290	h1930001	MD	BS	1			Lamp5	Lamp5_2	Lamp5	9	Inhibitory/non-telencephalic neurons	848	0.614387	GSM6028073
2559	B2	GSE200290	h1930001	MD	BS	1			Lamp5	Lamp5_0	Lamp5	9	Inhibitory/non-telencephalic neurons	1119	0.635389	GSM6028112
2560	B2	GSE200290	h1930001	MD	BS	1			Pvalb	Pvalb_0	Pvalb	13	Inhibitory/non-telencephalic neurons	902	0.706208	GSM6027914
2561	B2	GSE200290	h1930001	MD	BS	1			Pvalb	Pvalb_0	Pvalb	13	Inhibitory/non-telencephalic neurons	1214	0.636738	GSM6028147
2562	B2	GSE200290	h1930001	MD	BS	1			Sst	Sst_6	Sst	12	Inhibitory/non-telencephalic neurons	1261	0.721649	GSM6028135
2563	B2	GSE200290	h1930001	MD	BS	1			SubCtx-Cplx	SubCtx_Exc_1	SubCtx	5	Inhibitory/non-telencephalic neurons	1086	0.697974	GSM6027577
2564	B2	GSE200290	h1930001	MD	BS	1			SubCtx-Cplx	SubCtx_Exc_3	SubCtx	5	Inhibitory/non-telencephalic neurons	929	0.801938	GSM6027902
2565	B2	GSE200290	h1930001	MD	BS	1			SubCtx-Cplx	SubCtx_Inh_4	SubCtx	5	Inhibitory/non-telencephalic neurons	994	0.704225	GSM6028086
2566	B2	GSE200290	h1930001	MD	BS	1			THM-Exc	THM_Exc_0	THM	4	Inhibitory/non-telencephalic neurons	1074	0.757914	GSM6027564
2567	B2	GSE200290	h1930001	MD	BS	1			THM-Exc	THM_Exc_0	THM	4	Inhibitory/non-telencephalic neurons	1158	0.713299	GSM6027698
2568	B2	GSE200290	h1930001	MD	BS	1			THM-Exc	THM_Exc_0	THM	4	Inhibitory/non-telencephalic neurons	959	0.692388	GSM6027811
2569	B2	GSE200290	h1930001	MD	BS	1			THM-Exc	THM_Exc_0	THM	4	Inhibitory/non-telencephalic neurons	959	0.709072	GSM6027868
2570	B2	GSE200290	h1930001	MD	BS	1			THM-Exc	THM_Exc_0	THM	4	Inhibitory/non-telencephalic neurons	1116	0.75	GSM6027895
2571	B2	GSE200290	h1930001	MD	BS	1			THM-Exc	THM_Exc_0	THM	4	Inhibitory/non-telencephalic neurons	1063	0.71778	GSM6028074
2572	B2	GSE200290	h1930001	MD	BS	1			THM-Exc	THM_Exc_0	THM	4	Inhibitory/non-telencephalic neurons	1053	0.7151	GSM6028078
2573	B2	GSE200290	h1930001	MD	BS	1			THM-Inh	THM_Inh_0	THM	4	Inhibitory/non-telencephalic neurons	990	0.766667	GSM6027435
2574	B2	GSE200290	h1930001	MD	BS	1			THM-Inh	THM_Inh_0	THM	4	Inhibitory/non-telencephalic neurons	1140	0.813158	GSM6027510
2575	B2	GSE200290	h1930001	MD	BS	1			THM-Inh	THM_Inh_0	THM	4	Inhibitory/non-telencephalic neurons	997	0.754263	GSM6027526
2576	B2	GSE200290	h1930001	MD	BS	1			THM-Inh	THM_Inh_0	THM	4	Inhibitory/non-telencephalic neurons	962	0.786902	GSM6027531
2577	B2	GSE200290	h1930001	MD	BS	1			THM-Inh	THM_Inh_0	THM	4	Inhibitory/non-telencephalic neurons	1164	0.797251	GSM6027542
2578	B2	GSE200290	h1930001	MD	BS	1			THM-Inh	THM_Inh_0	THM	4	Inhibitory/non-telencephalic neurons	1211	0.767135	GSM6027566
2579	B2	GSE200290	h1930001	MD	BS	1			THM-Inh	THM_Inh_0	THM	4	Inhibitory/non-telencephalic neurons	1022	0.767123	GSM6027583
2580	B2	GSE200290	h1930001	MD	BS	1			THM-Inh	THM_Inh_0	THM	4	Inhibitory/non-telencephalic neurons	1108	0.783394	GSM6027590
2581	B2	GSE200290	h1930001	MD	BS	1			THM-Inh	THM_Inh_0	THM	4	Inhibitory/non-telencephalic neurons	884	0.813914	GSM6027594
2582	B2	GSE200290	h1930001	MD	BS	1			THM-Inh	THM_Inh_0	THM	4	Inhibitory/non-telencephalic neurons	1091	0.787351	GSM6027611
2583	B2	GSE200290	h1930001	MD	BS	1			THM-Inh	THM_Inh_0	THM	4	Inhibitory/non-telencephalic neurons	1066	0.80394	GSM6027634
2584	B2	GSE200290	h1930001	MD	BS	1			THM-Inh	THM_Inh_0	THM	4	Inhibitory/non-telencephalic neurons	935	0.803209	GSM6027646
2585	B2	GSE200290	h1930001	MD	BS	1			THM-Inh	THM_Inh_0	THM	4	Inhibitory/non-telencephalic neurons	1193	0.785415	GSM6027686
2586	B2	GSE200290	h1930001	MD	BS	1			THM-Inh	THM_Inh_0	THM	4	Inhibitory/non-telencephalic neurons	1239	0.756255	GSM6027706
2587	B2	GSE200290	h1930001	MD	BS	1			THM-Inh	THM_Inh_0	THM	4	Inhibitory/non-telencephalic neurons	895	0.803352	GSM6027775
2588	B2	GSE200290	h1930001	MD	BS	1			THM-Inh	THM_Inh_0	THM	4	Inhibitory/non-telencephalic neurons	1053	0.791073	GSM6027804
2590	B2	GSE200290	h1930001	MD	BS	1			THM-Inh	THM_Inh_0	THM	4	Inhibitory/non-telencephalic neurons	970	0.719588	GSM6027820
2591	B2	GSE200290	h1930001	MD	BS	1			THM-Inh	THM_Inh_0	THM	4	Inhibitory/non-telencephalic neurons	928	0.757543	GSM6027861
2592	B2	GSE200290	h1930001	MD	BS	1			THM-Inh	THM_Inh_0	THM	4	Inhibitory/non-telencephalic neurons	972	0.781893	GSM6027884
2593	B2	GSE200290	h1930001	MD	BS	1			THM-Inh	THM_Inh_0	THM	4	Inhibitory/non-telencephalic neurons	974	0.756674	GSM6027886
2594	B2	GSE200290	h1930001	MD	BS	1			THM-Inh	THM_Inh_0	THM	4	Inhibitory/non-telencephalic neurons	1082	0.759704	GSM6027891
2595	B2	GSE200290	h1930001	MD	BS	1			THM-Inh	THM_Inh_0	THM	4	Inhibitory/non-telencephalic neurons	1073	0.808015	GSM6027973
2596	B2	GSE200290	h1930001	MD	BS	1			THM-Inh	THM_Inh_0	THM	4	Inhibitory/non-telencephalic neurons	947	0.805702	GSM6027985
2597	B2	GSE200290	h1930001	MD	BS	1			THM-Inh	THM_Inh_0	THM	4	Inhibitory/non-telencephalic neurons	1240	0.722581	GSM6028004
2598	B2	GSE200290	h1930001	MD	BS	1			THM-Inh	THM_Inh_0	THM	4	Inhibitory/non-telencephalic neurons	1312	0.788364	GSM6028010
2599	B2	GSE200290	h1930001	MD	BS	1			THM-Inh	THM_Inh_0	THM	4	Inhibitory/non-telencephalic neurons	998	0.723447	GSM6028021
2600	B2	GSE200290	h1930001	MD	BS	1			THM-Inh	THM_Inh_0	THM	4	Inhibitory/non-telencephalic neurons	1054	0.762808	GSM6028030
2601	B2	GSE200290	h1930001	MD	BS	1			THM-Inh	THM_Inh_0	THM	4	Inhibitory/non-telencephalic neurons	987	0.73151	GSM6028039
2602	B2	GSE200290	h1930001	MD	BS	1			THM-Inh	THM_Inh_0	THM	4	Inhibitory/non-telencephalic neurons	1017	0.767945	GSM6028045
2603	B2	GSE200290	h1930001	MD	BS	1			THM-Inh	THM_Inh_0	THM	4	Inhibitory/non-telencephalic neurons	1174	0.761499	GSM6028048
2604	B2	GSE200290	h1930001	MD	BS	1			THM-Inh	THM_Inh_0	THM	4	Inhibitory/non-telencephalic neurons	880	0.769886	GSM6028057
2605	B2	GSE200290	h1930001	MD	BS	1			THM-Inh	THM_Inh_0	THM	4	Inhibitory/non-telencephalic neurons	1195	0.751464	GSM6028136
2606	B2	GSE200290	h1930001	MD	BS	1			THM-MB	THM_MB_THM_3	THM	4	Inhibitory/non-telencephalic neurons	1036	0.743243	GSM6027433
2607	B2	GSE200290	h1930001	MD	BS	1			THM-MB	THM_MB_THM_1	THM	4	Inhibitory/non-telencephalic neurons	1004	0.714143	GSM6027436
2608	B2	GSE200290	h1930001	MD	BS	1			THM-MB	THM_MB_THM_2	THM	4	Inhibitory/non-telencephalic neurons	937	0.758805	GSM6027437
2609	B2	GSE200290	h1930001	MD	BS	1			THM-MB	THM_MB_THM_1	THM	4	Inhibitory/non-telencephalic neurons	841	0.715815	GSM6027438
2610	B2	GSE200290	h1930001	MD	BS	1			THM-MB	THM_MB_THM_1	THM	4	Inhibitory/non-telencephalic neurons	1025	0.74439	GSM6027440
2611	B2	GSE200290	h1930001	MD	BS	1			THM-MB	THM_MB_THM_1	THM	4	Inhibitory/non-telencephalic neurons	2224	0.552008	GSM6027441
2612	B2	GSE200290	h1930001	MD	BS	1			THM-MB	THM_MB_THM_3	THM	4	Inhibitory/non-telencephalic neurons	1061	0.752592	GSM6027443
2613	B2	GSE200290	h1930001	MD	BS	1			THM-MB	THM_MB_THM_1	THM	4	Inhibitory/non-telencephalic neurons	1121	0.768956	GSM6027444
2614	B2	GSE200290	h1930001	MD	BS	1			THM-MB	THM_MB_THM_1	THM	4	Inhibitory/non-telencephalic neurons	964	0.753112	GSM6027451
2615	B2	GSE200290	h1930001	MD	BS	1			THM-MB	THM_MB_THM_1	THM	4	Inhibitory/non-telencephalic neurons	1184	0.724662	GSM6027452
2616	B2	GSE200290	h1930001	MD	BS	1			THM-MB	THM_MB_THM_1	THM	4	Inhibitory/non-telencephalic neurons	956	0.732218	GSM6027454
2617	B2	GSE200290	h1930001	MD	BS	1			THM-MB	THM_MB_THM_1	THM	4	Inhibitory/non-telencephalic neurons	987	0.737589	GSM6027456
2618	B2	GSE200290	h1930001	MD	BS	1			THM-MB	THM_MB_THM_3	THM	4	Inhibitory/non-telencephalic neurons	988	0.733806	GSM6027458
2619	B2	GSE200290	h1930001	MD	BS	1			THM-MB	THM_MB_THM_1	THM	4	Inhibitory/non-telencephalic neurons	967	0.771458	GSM6027459
2620	B2	GSE200290	h1930001	MD	BS	1			THM-MB	THM_MB_THM_1	THM	4	Inhibitory/non-telencephalic neurons	1060	0.783019	GSM6027460
2621	B2	GSE200290	h1930001	MD	BS	1			THM-MB	THM_MB_THM_1	THM	4	Inhibitory/non-telencephalic neurons	1001	0.744755	GSM6027464
2622	B2	GSE200290	h1930001	MD	BS	1			THM-MB	THM_MB_THM_3	THM	4	Inhibitory/non-telencephalic neurons	1153	0.743278	GSM6027465
2623	B2	GSE200290	h1930001	MD	BS	1			THM-MB	THM_MB_THM_1	THM	4	Inhibitory/non-telencephalic neurons	1122	0.729947	GSM6027468
2624	B2	GSE200290	h1930001	MD	BS	1			THM-MB	THM_MB_THM_1	THM	4	Inhibitory/non-telencephalic neurons	1060	0.736792	GSM6027469
2625	B2	GSE200290	h1930001	MD	BS	1			THM-MB	THM_MB_THM_3	THM	4	Inhibitory/non-telencephalic neurons	1182	0.738579	GSM6027470
2626	B2	GSE200290	h1930001	MD	BS	1			THM-MB	THM_MB_THM_1	THM	4	Inhibitory/non-telencephalic neurons	1008	0.736111	GSM6027472
2627	B2	GSE200290	h1930001	MD	BS	1			THM-MB	THM_MB_THM_3	THM	4	Inhibitory/non-telencephalic neurons	1163	0.702494	GSM6027473
2628	B2	GSE200290	h1930001	MD	BS	1			THM-MB	THM_MB_THM_1	THM	4	Inhibitory/non-telencephalic neurons	1106	0.709765	GSM6027475
2629	B2	GSE200290	h1930001	MD	BS	1			THM-MB	THM_MB_THM_1	THM	4	Inhibitory/non-telencephalic neurons	947	0.737064	GSM6027476
2630	B2	GSE200290	h1930001	MD	BS	1			THM-MB	THM_MB_THM_1	THM	4	Inhibitory/non-telencephalic neurons	906	0.747241	GSM6027477
2631	B2	GSE200290	h1930001	MD	BS	1			THM-MB	THM_MB_THM_3	THM	4	Inhibitory/non-telencephalic neurons	974	0.781314	GSM6027480
2632	B2	GSE200290	h1930001	MD	BS	1			THM-MB	THM_MB_THM_1	THM	4	Inhibitory/non-telencephalic neurons	962	0.762994	GSM6027481
2633	B2	GSE200290	h1930001	MD	BS	1			THM-MB	THM_MB_THM_1	THM	4	Inhibitory/non-telencephalic neurons	1055	0.709953	GSM6027483
2634	B2	GSE200290	h1930001	MD	BS	1			THM-MB	THM_MB_THM_3	THM	4	Inhibitory/non-telencephalic neurons	916	0.69869	GSM6027488
2635	B2	GSE200290	h1930001	MD	BS	1			THM-MB	THM_MB_THM_3	THM	4	Inhibitory/non-telencephalic neurons	975	0.735385	GSM6027492
2636	B2	GSE200290	h1930001	MD	BS	1			THM-MB	THM_MB_THM_1	THM	4	Inhibitory/non-telencephalic neurons	949	0.777661	GSM6027493
2637	B2	GSE200290	h1930001	MD	BS	1			THM-MB	THM_MB_THM_1	THM	4	Inhibitory/non-telencephalic neurons	959	0.690302	GSM6027496
2638	B2	GSE200290	h1930001	MD	BS	1			THM-MB	THM_MB_THM_3	THM	4	Inhibitory/non-telencephalic neurons	1288	0.681159	GSM6027498
2639	B2	GSE200290	h1930001	MD	BS	1			THM-MB	THM_MB_THM_1	THM	4	Inhibitory/non-telencephalic neurons	974	0.693018	GSM6027499
2640	B2	GSE200290	h1930001	MD	BS	1			THM-MB	THM_MB_THM_1	THM	4	Inhibitory/non-telencephalic neurons	952	0.760504	GSM6027503
2641	B2	GSE200290	h1930001	MD	BS	1			THM-MB	THM_MB_THM_3	THM	4	Inhibitory/non-telencephalic neurons	1049	0.717827	GSM6027504
2642	B2	GSE200290	h1930001	MD	BS	1			THM-MB	THM_MB_THM_1	THM	4	Inhibitory/non-telencephalic neurons	1054	0.73055	GSM6027506
2643	B2	GSE200290	h1930001	MD	BS	1			THM-MB	THM_MB_THM_1	THM	4	Inhibitory/non-telencephalic neurons	1002	0.749501	GSM6027508
2644	B2	GSE200290	h1930001	MD	BS	1			THM-MB	THM_MB_THM_0	THM	4	Inhibitory/non-telencephalic neurons	937	0.688367	GSM6027509
2645	B2	GSE200290	h1930001	MD	BS	1			THM-MB	THM_MB_THM_1	THM	4	Inhibitory/non-telencephalic neurons	986	0.757606	GSM6027511
2646	B2	GSE200290	h1930001	MD	BS	1			THM-MB	THM_MB_THM_2	THM	4	Inhibitory/non-telencephalic neurons	968	0.748967	GSM6027512
2647	B2	GSE200290	h1930001	MD	BS	1			THM-MB	THM_MB_THM_1	THM	4	Inhibitory/non-telencephalic neurons	956	0.762552	GSM6027515
2648	B2	GSE200290	h1930001	MD	BS	1			THM-MB	THM_MB_THM_1	THM	4	Inhibitory/non-telencephalic neurons	957	0.683386	GSM6027516
2649	B2	GSE200290	h1930001	MD	BS	1			THM-MB	THM_MB_THM_3	THM	4	Inhibitory/non-telencephalic neurons	912	0.755482	GSM6027517
2650	B2	GSE200290	h1930001	MD	BS	1			THM-MB	THM_MB_THM_1	THM	4	Inhibitory/non-telencephalic neurons	1111	0.69667	GSM6027518
2651	B2	GSE200290	h1930001	MD	BS	1			THM-MB	THM_MB_THM_1	THM	4	Inhibitory/non-telencephalic neurons	1036	0.717181	GSM6027519
2652	B2	GSE200290	h1930001	MD	BS	1			THM-MB	THM_MB_THM_3	THM	4	Inhibitory/non-telencephalic neurons	873	0.730813	GSM6027520
2653	B2	GSE200290	h1930001	MD	BS	1			THM-MB	THM_MB_THM_1	THM	4	Inhibitory/non-telencephalic neurons	892	0.776906	GSM6027521
2654	B2	GSE200290	h1930001	MD	BS	1			THM-MB	THM_MB_THM_1	THM	4	Inhibitory/non-telencephalic neurons	1003	0.760718	GSM6027523
2655	B2	GSE200290	h1930001	MD	BS	1			THM-MB	THM_MB_THM_1	THM	4	Inhibitory/non-telencephalic neurons	934	0.724839	GSM6027525
2656	B2	GSE200290	h1930001	MD	BS	1			THM-MB	THM_MB_THM_3	THM	4	Inhibitory/non-telencephalic neurons	1108	0.756318	GSM6027528
2657	B2	GSE200290	h1930001	MD	BS	1			THM-MB	THM_MB_THM_1	THM	4	Inhibitory/non-telencephalic neurons	1133	0.796999	GSM6027530
2658	B2	GSE200290	h1930001	MD	BS	1			THM-MB	THM_MB_THM_1	THM	4	Inhibitory/non-telencephalic neurons	917	0.742639	GSM6027532
2659	B2	GSE200290	h1930001	MD	BS	1			THM-MB	THM_MB_THM_1	THM	4	Inhibitory/non-telencephalic neurons	1103	0.754306	GSM6027533
2660	B2	GSE200290	h1930001	MD	BS	1			THM-MB	THM_MB_THM_1	THM	4	Inhibitory/non-telencephalic neurons	1023	0.722385	GSM6027534
2661	B2	GSE200290	h1930001	MD	BS	1			THM-MB	THM_MB_THM_1	THM	4	Inhibitory/non-telencephalic neurons	1001	0.735265	GSM6027535
2662	B2	GSE200290	h1930001	MD	BS	1			THM-MB	THM_MB_THM_1	THM	4	Inhibitory/non-telencephalic neurons	922	0.71692	GSM6027536
2663	B2	GSE200290	h1930001	MD	BS	1			THM-MB	THM_MB_THM_1	THM	4	Inhibitory/non-telencephalic neurons	1002	0.769461	GSM6027538
2664	B2	GSE200290	h1930001	MD	BS	1			THM-MB	THM_MB_THM_1	THM	4	Inhibitory/non-telencephalic neurons	979	0.754852	GSM6027539
2665	B2	GSE200290	h1930001	MD	BS	1			THM-MB	THM_MB_THM_1	THM	4	Inhibitory/non-telencephalic neurons	1047	0.722063	GSM6027543
2666	B2	GSE200290	h1930001	MD	BS	1			THM-MB	THM_MB_THM_0	THM	4	Inhibitory/non-telencephalic neurons	1040	0.697115	GSM6027544
2667	B2	GSE200290	h1930001	MD	BS	1			THM-MB	THM_MB_THM_1	THM	4	Inhibitory/non-telencephalic neurons	922	0.736443	GSM6027548
2668	B2	GSE200290	h1930001	MD	BS	1			THM-MB	THM_MB_THM_3	THM	4	Inhibitory/non-telencephalic neurons	1106	0.735986	GSM6027549
2669	B2	GSE200290	h1930001	MD	BS	1			THM-MB	THM_MB_THM_1	THM	4	Inhibitory/non-telencephalic neurons	1062	0.729755	GSM6027550
2670	B2	GSE200290	h1930001	MD	BS	1			THM-MB	THM_MB_THM_0	THM	4	Inhibitory/non-telencephalic neurons	1075	0.730233	GSM6027551
2671	B2	GSE200290	h1930001	MD	BS	1			THM-MB	THM_MB_THM_1	THM	4	Inhibitory/non-telencephalic neurons	949	0.742887	GSM6027553
2672	B2	GSE200290	h1930001	MD	BS	1			THM-MB	THM_MB_THM_1	THM	4	Inhibitory/non-telencephalic neurons	967	0.751293	GSM6027554
2673	B2	GSE200290	h1930001	MD	BS	1			THM-MB	THM_MB_THM_1	THM	4	Inhibitory/non-telencephalic neurons	1216	0.746711	GSM6027556
2674	B2	GSE200290	h1930001	MD	BS	1			THM-MB	THM_MB_THM_1	THM	4	Inhibitory/non-telencephalic neurons	1184	0.753378	GSM6027557
2675	B2	GSE200290	h1930001	MD	BS	1			THM-MB	THM_MB_THM_1	THM	4	Inhibitory/non-telencephalic neurons	1040	0.759615	GSM6027561
2676	B2	GSE200290	h1930001	MD	BS	1			THM-MB	THM_MB_THM_1	THM	4	Inhibitory/non-telencephalic neurons	1142	0.754816	GSM6027563
2677	B2	GSE200290	h1930001	MD	BS	1			THM-MB	THM_MB_THM_1	THM	4	Inhibitory/non-telencephalic neurons	1083	0.744229	GSM6027565
2678	B2	GSE200290	h1930001	MD	BS	1			THM-MB	THM_MB_THM_1	THM	4	Inhibitory/non-telencephalic neurons	1060	0.722642	GSM6027567
2679	B2	GSE200290	h1930001	MD	BS	1			THM-MB	THM_MB_THM_1	THM	4	Inhibitory/non-telencephalic neurons	1239	0.778854	GSM6027569
2680	B2	GSE200290	h1930001	MD	BS	1			THM-MB	THM_MB_THM_1	THM	4	Inhibitory/non-telencephalic neurons	947	0.757128	GSM6027571
2681	B2	GSE200290	h1930001	MD	BS	1			THM-MB	THM_MB_THM_1	THM	4	Inhibitory/non-telencephalic neurons	1268	0.744479	GSM6027572
2682	B2	GSE200290	h1930001	MD	BS	1			THM-MB	THM_MB_THM_3	THM	4	Inhibitory/non-telencephalic neurons	1165	0.76309	GSM6027573
2683	B2	GSE200290	h1930001	MD	BS	1			THM-MB	THM_MB_THM_2	THM	4	Inhibitory/non-telencephalic neurons	1172	0.738055	GSM6027574
2684	B2	GSE200290	h1930001	MD	BS	1			THM-MB	THM_MB_THM_1	THM	4	Inhibitory/non-telencephalic neurons	1074	0.719739	GSM6027575
2685	B2	GSE200290	h1930001	MD	BS	1			THM-MB	THM_MB_THM_3	THM	4	Inhibitory/non-telencephalic neurons	1050	0.713333	GSM6027576
2686	B2	GSE200290	h1930001	MD	BS	1			THM-MB	THM_MB_THM_1	THM	4	Inhibitory/non-telencephalic neurons	976	0.710041	GSM6027579
2687	B2	GSE200290	h1930001	MD	BS	1			THM-MB	THM_MB_THM_1	THM	4	Inhibitory/non-telencephalic neurons	1183	0.727811	GSM6027581
2688	B2	GSE200290	h1930001	MD	BS	1			THM-MB	THM_MB_THM_3	THM	4	Inhibitory/non-telencephalic neurons	885	0.683616	GSM6027584
2689	B2	GSE200290	h1930001	MD	BS	1			THM-MB	THM_MB_THM_3	THM	4	Inhibitory/non-telencephalic neurons	936	0.715812	GSM6027585
2690	B2	GSE200290	h1930001	MD	BS	1			THM-MB	THM_MB_THM_1	THM	4	Inhibitory/non-telencephalic neurons	1040	0.727885	GSM6027586
2691	B2	GSE200290	h1930001	MD	BS	1			THM-MB	THM_MB_THM_1	THM	4	Inhibitory/non-telencephalic neurons	1124	0.766014	GSM6027587
2692	B2	GSE200290	h1930001	MD	BS	1			THM-MB	THM_MB_THM_1	THM	4	Inhibitory/non-telencephalic neurons	958	0.782881	GSM6027588
2693	B2	GSE200290	h1930001	MD	BS	1			THM-MB	THM_MB_THM_3	THM	4	Inhibitory/non-telencephalic neurons	988	0.691296	GSM6027589
2694	B2	GSE200290	h1930001	MD	BS	1			THM-MB	THM_MB_THM_1	THM	4	Inhibitory/non-telencephalic neurons	890	0.758427	GSM6027591
2695	B2	GSE200290	h1930001	MD	BS	1			THM-MB	THM_MB_THM_3	THM	4	Inhibitory/non-telencephalic neurons	1061	0.761074	GSM6027592
2696	B2	GSE200290	h1930001	MD	BS	1			THM-MB	THM_MB_THM_1	THM	4	Inhibitory/non-telencephalic neurons	1000	0.749	GSM6027595
2697	B2	GSE200290	h1930001	MD	BS	1			THM-MB	THM_MB_THM_1	THM	4	Inhibitory/non-telencephalic neurons	1043	0.774688	GSM6027596
2698	B2	GSE200290	h1930001	MD	BS	1			THM-MB	THM_MB_THM_1	THM	4	Inhibitory/non-telencephalic neurons	989	0.726997	GSM6027597
2699	B2	GSE200290	h1930001	MD	BS	1			THM-MB	THM_MB_THM_1	THM	4	Inhibitory/non-telencephalic neurons	1066	0.739212	GSM6027598
2700	B2	GSE200290	h1930001	MD	BS	1			THM-MB	THM_MB_THM_3	THM	4	Inhibitory/non-telencephalic neurons	1034	0.7147	GSM6027600
2701	B2	GSE200290	h1930001	MD	BS	1			THM-MB	THM_MB_THM_1	THM	4	Inhibitory/non-telencephalic neurons	1200	0.750833	GSM6027603
2702	B2	GSE200290	h1930001	MD	BS	1			THM-MB	THM_MB_THM_1	THM	4	Inhibitory/non-telencephalic neurons	1119	0.7042	GSM6027604
2703	B2	GSE200290	h1930001	MD	BS	1			THM-MB	THM_MB_THM_1	THM	4	Inhibitory/non-telencephalic neurons	1102	0.725953	GSM6027605
2704	B2	GSE200290	h1930001	MD	BS	1			THM-MB	THM_MB_THM_1	THM	4	Inhibitory/non-telencephalic neurons	1028	0.707198	GSM6027606
2705	B2	GSE200290	h1930001	MD	BS	1			THM-MB	THM_MB_THM_1	THM	4	Inhibitory/non-telencephalic neurons	1037	0.755063	GSM6027607
2706	B2	GSE200290	h1930001	MD	BS	1			THM-MB	THM_MB_THM_3	THM	4	Inhibitory/non-telencephalic neurons	1113	0.733154	GSM6027608
2707	B2	GSE200290	h1930001	MD	BS	1			THM-MB	THM_MB_THM_1	THM	4	Inhibitory/non-telencephalic neurons	1183	0.721471	GSM6027612
2708	B2	GSE200290	h1930001	MD	BS	1			THM-MB	THM_MB_THM_1	THM	4	Inhibitory/non-telencephalic neurons	1098	0.765938	GSM6027615
2709	B2	GSE200290	h1930001	MD	BS	1			THM-MB	THM_MB_THM_1	THM	4	Inhibitory/non-telencephalic neurons	1241	0.76108	GSM6027617
2710	B2	GSE200290	h1930001	MD	BS	1			THM-MB	THM_MB_THM_1	THM	4	Inhibitory/non-telencephalic neurons	1092	0.724359	GSM6027618
2711	B2	GSE200290	h1930001	MD	BS	1			THM-MB	THM_MB_THM_1	THM	4	Inhibitory/non-telencephalic neurons	1065	0.742723	GSM6027619
2712	B2	GSE200290	h1930001	MD	BS	1			THM-MB	THM_MB_THM_3	THM	4	Inhibitory/non-telencephalic neurons	973	0.743063	GSM6027620
2713	B2	GSE200290	h1930001	MD	BS	1			THM-MB	THM_MB_THM_1	THM	4	Inhibitory/non-telencephalic neurons	935	0.783601	GSM6027622
2714	B2	GSE200290	h1930001	MD	BS	1			THM-MB	THM_MB_THM_1	THM	4	Inhibitory/non-telencephalic neurons	949	0.746048	GSM6027623
2715	B2	GSE200290	h1930001	MD	BS	1			THM-MB	THM_MB_THM_1	THM	4	Inhibitory/non-telencephalic neurons	1088	0.753676	GSM6027624
2716	B2	GSE200290	h1930001	MD	BS	1			THM-MB	THM_MB_THM_3	THM	4	Inhibitory/non-telencephalic neurons	984	0.735772	GSM6027625
2717	B2	GSE200290	h1930001	MD	BS	1			THM-MB	THM_MB_THM_1	THM	4	Inhibitory/non-telencephalic neurons	1189	0.75778	GSM6027626
2718	B2	GSE200290	h1930001	MD	BS	1			THM-MB	THM_MB_THM_1	THM	4	Inhibitory/non-telencephalic neurons	1035	0.748792	GSM6027627
2719	B2	GSE200290	h1930001	MD	BS	1			THM-MB	THM_MB_THM_1	THM	4	Inhibitory/non-telencephalic neurons	1149	0.71497	GSM6027629
2720	B2	GSE200290	h1930001	MD	BS	1			THM-MB	THM_MB_THM_0	THM	4	Inhibitory/non-telencephalic neurons	1184	0.715372	GSM6027630
2721	B2	GSE200290	h1930001	MD	BS	1			THM-MB	THM_MB_THM_1	THM	4	Inhibitory/non-telencephalic neurons	943	0.73701	GSM6027631
2722	B2	GSE200290	h1930001	MD	BS	1			THM-MB	THM_MB_THM_1	THM	4	Inhibitory/non-telencephalic neurons	1133	0.751103	GSM6027632
2723	B2	GSE200290	h1930001	MD	BS	1			THM-MB	THM_MB_THM_0	THM	4	Inhibitory/non-telencephalic neurons	1003	0.686939	GSM6027635
2724	B2	GSE200290	h1930001	MD	BS	1			THM-MB	THM_MB_THM_3	THM	4	Inhibitory/non-telencephalic neurons	1236	0.773463	GSM6027636
2725	B2	GSE200290	h1930001	MD	BS	1			THM-MB	THM_MB_THM_1	THM	4	Inhibitory/non-telencephalic neurons	1138	0.769772	GSM6027637
2726	B2	GSE200290	h1930001	MD	BS	1			THM-MB	THM_MB_THM_1	THM	4	Inhibitory/non-telencephalic neurons	1061	0.737041	GSM6027639
2727	B2	GSE200290	h1930001	MD	BS	1			THM-MB	THM_MB_THM_3	THM	4	Inhibitory/non-telencephalic neurons	1299	0.74057	GSM6027640
2728	B2	GSE200290	h1930001	MD	BS	1			THM-MB	THM_MB_THM_1	THM	4	Inhibitory/non-telencephalic neurons	1072	0.701493	GSM6027641
2729	B2	GSE200290	h1930001	MD	BS	1			THM-MB	THM_MB_THM_1	THM	4	Inhibitory/non-telencephalic neurons	1017	0.743363	GSM6027642
2730	B2	GSE200290	h1930001	MD	BS	1			THM-MB	THM_MB_THM_1	THM	4	Inhibitory/non-telencephalic neurons	1056	0.720644	GSM6027643
2731	B2	GSE200290	h1930001	MD	BS	1			THM-MB	THM_MB_THM_3	THM	4	Inhibitory/non-telencephalic neurons	1055	0.730806	GSM6027644
2732	B2	GSE200290	h1930001	MD	BS	1			THM-MB	THM_MB_THM_1	THM	4	Inhibitory/non-telencephalic neurons	927	0.773463	GSM6027645
2733	B2	GSE200290	h1930001	MD	BS	1			THM-MB	THM_MB_THM_1	THM	4	Inhibitory/non-telencephalic neurons	1176	0.712585	GSM6027647
2734	B2	GSE200290	h1930001	MD	BS	1			THM-MB	THM_MB_THM_1	THM	4	Inhibitory/non-telencephalic neurons	1085	0.717972	GSM6027648
2735	B2	GSE200290	h1930001	MD	BS	1			THM-MB	THM_MB_THM_1	THM	4	Inhibitory/non-telencephalic neurons	996	0.759036	GSM6027649
2736	B2	GSE200290	h1930001	MD	BS	1			THM-MB	THM_MB_THM_1	THM	4	Inhibitory/non-telencephalic neurons	1034	0.724371	GSM6027650
2737	B2	GSE200290	h1930001	MD	BS	1			THM-MB	THM_MB_THM_1	THM	4	Inhibitory/non-telencephalic neurons	1215	0.767901	GSM6027651
2738	B2	GSE200290	h1930001	MD	BS	1			THM-MB	THM_MB_THM_1	THM	4	Inhibitory/non-telencephalic neurons	1198	0.739566	GSM6027652
2739	B2	GSE200290	h1930001	MD	BS	1			THM-MB	THM_MB_THM_2	THM	4	Inhibitory/non-telencephalic neurons	1048	0.726622	GSM6027654
2740	B2	GSE200290	h1930001	MD	BS	1			THM-MB	THM_MB_THM_3	THM	4	Inhibitory/non-telencephalic neurons	1101	0.719346	GSM6027655
2741	B2	GSE200290	h1930001	MD	BS	1			THM-MB	THM_MB_THM_3	THM	4	Inhibitory/non-telencephalic neurons	1160	0.743966	GSM6027656
2742	B2	GSE200290	h1930001	MD	BS	1			THM-MB	THM_MB_THM_1	THM	4	Inhibitory/non-telencephalic neurons	911	0.755214	GSM6027657
2743	B2	GSE200290	h1930001	MD	BS	1			THM-MB	THM_MB_THM_2	THM	4	Inhibitory/non-telencephalic neurons	1001	0.716284	GSM6027658
2744	B2	GSE200290	h1930001	MD	BS	1			THM-MB	THM_MB_THM_1	THM	4	Inhibitory/non-telencephalic neurons	998	0.726453	GSM6027660
2745	B2	GSE200290	h1930001	MD	BS	1			THM-MB	THM_MB_THM_1	THM	4	Inhibitory/non-telencephalic neurons	1067	0.719775	GSM6027664
2746	B2	GSE200290	h1930001	MD	BS	1			THM-MB	THM_MB_THM_3	THM	4	Inhibitory/non-telencephalic neurons	1134	0.717813	GSM6027665
2747	B2	GSE200290	h1930001	MD	BS	1			THM-MB	THM_MB_THM_3	THM	4	Inhibitory/non-telencephalic neurons	966	0.742236	GSM6027667
2748	B2	GSE200290	h1930001	MD	BS	1			THM-MB	THM_MB_THM_1	THM	4	Inhibitory/non-telencephalic neurons	1000	0.788	GSM6027671
2749	B2	GSE200290	h1930001	MD	BS	1			THM-MB	THM_MB_THM_1	THM	4	Inhibitory/non-telencephalic neurons	1037	0.713597	GSM6027673
2750	B2	GSE200290	h1930001	MD	BS	1			THM-MB	THM_MB_THM_1	THM	4	Inhibitory/non-telencephalic neurons	1075	0.776744	GSM6027674
2751	B2	GSE200290	h1930001	MD	BS	1			THM-MB	THM_MB_THM_1	THM	4	Inhibitory/non-telencephalic neurons	1109	0.754734	GSM6027675
2752	B2	GSE200290	h1930001	MD	BS	1			THM-MB	THM_MB_THM_1	THM	4	Inhibitory/non-telencephalic neurons	1007	0.747766	GSM6027677
2753	B2	GSE200290	h1930001	MD	BS	1			THM-MB	THM_MB_THM_1	THM	4	Inhibitory/non-telencephalic neurons	1199	0.75563	GSM6027681
2754	B2	GSE200290	h1930001	MD	BS	1			THM-MB	THM_MB_THM_1	THM	4	Inhibitory/non-telencephalic neurons	1184	0.755068	GSM6027682
2755	B2	GSE200290	h1930001	MD	BS	1			THM-MB	THM_MB_THM_1	THM	4	Inhibitory/non-telencephalic neurons	1041	0.682997	GSM6027685
2756	B2	GSE200290	h1930001	MD	BS	1			THM-MB	THM_MB_THM_0	THM	4	Inhibitory/non-telencephalic neurons	980	0.702041	GSM6027688
2757	B2	GSE200290	h1930001	MD	BS	1			THM-MB	THM_MB_THM_1	THM	4	Inhibitory/non-telencephalic neurons	1266	0.78831	GSM6027689
2758	B2	GSE200290	h1930001	MD	BS	1			THM-MB	THM_MB_THM_3	THM	4	Inhibitory/non-telencephalic neurons	1197	0.724311	GSM6027690
2759	B2	GSE200290	h1930001	MD	BS	1			THM-MB	THM_MB_THM_1	THM	4	Inhibitory/non-telencephalic neurons	836	0.748804	GSM6027691
2760	B2	GSE200290	h1930001	MD	BS	1			THM-MB	THM_MB_THM_1	THM	4	Inhibitory/non-telencephalic neurons	1037	0.693346	GSM6027692
2761	B2	GSE200290	h1930001	MD	BS	1			THM-MB	THM_MB_THM_1	THM	4	Inhibitory/non-telencephalic neurons	1050	0.781905	GSM6027694
2762	B2	GSE200290	h1930001	MD	BS	1			THM-MB	THM_MB_THM_1	THM	4	Inhibitory/non-telencephalic neurons	1113	0.7646	GSM6027695
2763	B2	GSE200290	h1930001	MD	BS	1			THM-MB	THM_MB_THM_3	THM	4	Inhibitory/non-telencephalic neurons	1170	0.749573	GSM6027696
2764	B2	GSE200290	h1930001	MD	BS	1			THM-MB	THM_MB_THM_1	THM	4	Inhibitory/non-telencephalic neurons	1135	0.750661	GSM6027697
2765	B2	GSE200290	h1930001	MD	BS	1			THM-MB	THM_MB_THM_1	THM	4	Inhibitory/non-telencephalic neurons	1311	0.724638	GSM6027699
2766	B2	GSE200290	h1930001	MD	BS	1			THM-MB	THM_MB_THM_1	THM	4	Inhibitory/non-telencephalic neurons	1111	0.758776	GSM6027700
2767	B2	GSE200290	h1930001	MD	BS	1			THM-MB	THM_MB_THM_1	THM	4	Inhibitory/non-telencephalic neurons	1325	0.756226	GSM6027701
2768	B2	GSE200290	h1930001	MD	BS	1			THM-MB	THM_MB_THM_1	THM	4	Inhibitory/non-telencephalic neurons	1396	0.712034	GSM6027702
2769	B2	GSE200290	h1930001	MD	BS	1			THM-MB	THM_MB_THM_1	THM	4	Inhibitory/non-telencephalic neurons	1137	0.719437	GSM6027703
2770	B2	GSE200290	h1930001	MD	BS	1			THM-MB	THM_MB_THM_1	THM	4	Inhibitory/non-telencephalic neurons	1044	0.698276	GSM6027704
2771	B2	GSE200290	h1930001	MD	BS	1			THM-MB	THM_MB_THM_3	THM	4	Inhibitory/non-telencephalic neurons	913	0.727273	GSM6027708
2772	B2	GSE200290	h1930001	MD	BS	1			THM-MB	THM_MB_THM_3	THM	4	Inhibitory/non-telencephalic neurons	1185	0.672574	GSM6027709
2773	B2	GSE200290	h1930001	MD	BS	1			THM-MB	THM_MB_THM_3	THM	4	Inhibitory/non-telencephalic neurons	1122	0.707665	GSM6027710
2774	B2	GSE200290	h1930001	MD	BS	1			THM-MB	THM_MB_THM_3	THM	4	Inhibitory/non-telencephalic neurons	1036	0.700772	GSM6027711
2775	B2	GSE200290	h1930001	MD	BS	1			THM-MB	THM_MB_THM_1	THM	4	Inhibitory/non-telencephalic neurons	1054	0.748577	GSM6027712
2776	B2	GSE200290	h1930001	MD	BS	1			THM-MB	THM_MB_THM_1	THM	4	Inhibitory/non-telencephalic neurons	1260	0.747619	GSM6027713
2777	B2	GSE200290	h1930001	MD	BS	1			THM-MB	THM_MB_THM_1	THM	4	Inhibitory/non-telencephalic neurons	1259	0.714059	GSM6027714
2778	B2	GSE200290	h1930001	MD	BS	1			THM-MB	THM_MB_THM_1	THM	4	Inhibitory/non-telencephalic neurons	1396	0.731375	GSM6027717
2779	B2	GSE200290	h1930001	MD	BS	1			THM-MB	THM_MB_THM_1	THM	4	Inhibitory/non-telencephalic neurons	1070	0.693925	GSM6027718
2780	B2	GSE200290	h1930001	MD	BS	1			THM-MB	THM_MB_THM_1	THM	4	Inhibitory/non-telencephalic neurons	1200	0.754167	GSM6027719
2781	B2	GSE200290	h1930001	MD	BS	1			THM-MB	THM_MB_THM_3	THM	4	Inhibitory/non-telencephalic neurons	1099	0.77434	GSM6027721
2782	B2	GSE200290	h1930001	MD	BS	1			THM-MB	THM_MB_THM_1	THM	4	Inhibitory/non-telencephalic neurons	919	0.744831	GSM6027722
2783	B2	GSE200290	h1930001	MD	BS	1			THM-MB	THM_MB_THM_1	THM	4	Inhibitory/non-telencephalic neurons	984	0.692073	GSM6027724
2784	B2	GSE200290	h1930001	MD	BS	1			THM-MB	THM_MB_THM_1	THM	4	Inhibitory/non-telencephalic neurons	987	0.739615	GSM6027725
2785	B2	GSE200290	h1930001	MD	BS	1			THM-MB	THM_MB_THM_1	THM	4	Inhibitory/non-telencephalic neurons	1221	0.752252	GSM6027726
2786	B2	GSE200290	h1930001	MD	BS	1			THM-MB	THM_MB_THM_1	THM	4	Inhibitory/non-telencephalic neurons	1066	0.751407	GSM6027727
2787	B2	GSE200290	h1930001	MD	BS	1			THM-MB	THM_MB_THM_1	THM	4	Inhibitory/non-telencephalic neurons	1160	0.72069	GSM6027728
2788	B2	GSE200290	h1930001	MD	BS	1			THM-MB	THM_MB_THM_3	THM	4	Inhibitory/non-telencephalic neurons	1293	0.743619	GSM6027732
2789	B2	GSE200290	h1930001	MD	BS	1			THM-MB	THM_MB_THM_1	THM	4	Inhibitory/non-telencephalic neurons	1126	0.743339	GSM6027733
2790	B2	GSE200290	h1930001	MD	BS	1			THM-MB	THM_MB_THM_0	THM	4	Inhibitory/non-telencephalic neurons	1108	0.640794	GSM6027734
2791	B2	GSE200290	h1930001	MD	BS	1			THM-MB	THM_MB_THM_1	THM	4	Inhibitory/non-telencephalic neurons	943	0.749735	GSM6027735
2792	B2	GSE200290	h1930001	MD	BS	1			THM-MB	THM_MB_THM_1	THM	4	Inhibitory/non-telencephalic neurons	1031	0.769156	GSM6027740
2793	B2	GSE200290	h1930001	MD	BS	1			THM-MB	THM_MB_THM_2	THM	4	Inhibitory/non-telencephalic neurons	946	0.766385	GSM6027743
2794	B2	GSE200290	h1930001	MD	BS	1			THM-MB	THM_MB_THM_1	THM	4	Inhibitory/non-telencephalic neurons	1079	0.709917	GSM6027747
2795	B2	GSE200290	h1930001	MD	BS	1			THM-MB	THM_MB_THM_3	THM	4	Inhibitory/non-telencephalic neurons	1018	0.742633	GSM6027748
2796	B2	GSE200290	h1930001	MD	BS	1			THM-MB	THM_MB_THM_1	THM	4	Inhibitory/non-telencephalic neurons	1275	0.704314	GSM6027751
2797	B2	GSE200290	h1930001	MD	BS	1			THM-MB	THM_MB_THM_1	THM	4	Inhibitory/non-telencephalic neurons	1204	0.716777	GSM6027752
2798	B2	GSE200290	h1930001	MD	BS	1			THM-MB	THM_MB_THM_1	THM	4	Inhibitory/non-telencephalic neurons	1062	0.76742	GSM6027755
2799	B2	GSE200290	h1930001	MD	BS	1			THM-MB	THM_MB_THM_3	THM	4	Inhibitory/non-telencephalic neurons	1238	0.722132	GSM6027759
2800	B2	GSE200290	h1930001	MD	BS	1			THM-MB	THM_MB_THM_1	THM	4	Inhibitory/non-telencephalic neurons	1046	0.799235	GSM6027760
2801	B2	GSE200290	h1930001	MD	BS	1			THM-MB	THM_MB_THM_3	THM	4	Inhibitory/non-telencephalic neurons	1042	0.762956	GSM6027763
2802	B2	GSE200290	h1930001	MD	BS	1			THM-MB	THM_MB_THM_1	THM	4	Inhibitory/non-telencephalic neurons	1030	0.770874	GSM6027764
2803	B2	GSE200290	h1930001	MD	BS	1			THM-MB	THM_MB_THM_2	THM	4	Inhibitory/non-telencephalic neurons	945	0.713228	GSM6027767
2804	B2	GSE200290	h1930001	MD	BS	1			THM-MB	THM_MB_THM_1	THM	4	Inhibitory/non-telencephalic neurons	1077	0.675952	GSM6027771
2805	B2	GSE200290	h1930001	MD	BS	1			THM-MB	THM_MB_THM_1	THM	4	Inhibitory/non-telencephalic neurons	1051	0.715985	GSM6027772
2806	B2	GSE200290	h1930001	MD	BS	1			THM-MB	THM_MB_THM_3	THM	4	Inhibitory/non-telencephalic neurons	1005	0.702488	GSM6027776
2807	B2	GSE200290	h1930001	MD	BS	1			THM-MB	THM_MB_THM_1	THM	4	Inhibitory/non-telencephalic neurons	1223	0.733442	GSM6027779
2808	B2	GSE200290	h1930001	MD	BS	1			THM-MB	THM_MB_THM_1	THM	4	Inhibitory/non-telencephalic neurons	1273	0.712883	GSM6027780
2809	B2	GSE200290	h1930001	MD	BS	1			THM-MB	THM_MB_THM_3	THM	4	Inhibitory/non-telencephalic neurons	966	0.745342	GSM6027783
2810	B2	GSE200290	h1930001	MD	BS	1			THM-MB	THM_MB_THM_1	THM	4	Inhibitory/non-telencephalic neurons	1233	0.752636	GSM6027787
2811	B2	GSE200290	h1930001	MD	BS	1			THM-MB	THM_MB_THM_1	THM	4	Inhibitory/non-telencephalic neurons	1213	0.769167	GSM6027788
2812	B2	GSE200290	h1930001	MD	BS	1			THM-MB	THM_MB_THM_1	THM	4	Inhibitory/non-telencephalic neurons	947	0.76452	GSM6027791
2813	B2	GSE200290	h1930001	MD	BS	1			THM-MB	THM_MB_THM_1	THM	4	Inhibitory/non-telencephalic neurons	1132	0.745583	GSM6027795
2814	B2	GSE200290	h1930001	MD	BS	1			THM-MB	THM_MB_THM_1	THM	4	Inhibitory/non-telencephalic neurons	973	0.750257	GSM6027799
2815	B2	GSE200290	h1930001	MD	BS	1			THM-MB	THM_MB_THM_3	THM	4	Inhibitory/non-telencephalic neurons	952	0.704832	GSM6027800
2816	B2	GSE200290	h1930001	MD	BS	1			THM-MB	THM_MB_THM_1	THM	4	Inhibitory/non-telencephalic neurons	890	0.75618	GSM6027803
2817	B2	GSE200290	h1930001	MD	BS	1			THM-MB	THM_MB_THM_0	THM	4	Inhibitory/non-telencephalic neurons	1046	0.700765	GSM6027805
2818	B2	GSE200290	h1930001	MD	BS	1			THM-MB	THM_MB_THM_1	THM	4	Inhibitory/non-telencephalic neurons	996	0.721386	GSM6027808
2819	B2	GSE200290	h1930001	MD	BS	1			THM-MB	THM_MB_THM_1	THM	4	Inhibitory/non-telencephalic neurons	1089	0.763545	GSM6027812
2820	B2	GSE200290	h1930001	MD	BS	1			THM-MB	THM_MB_THM_1	THM	4	Inhibitory/non-telencephalic neurons	924	0.726732	GSM6027814
2821	B2	GSE200290	h1930001	MD	BS	1			THM-MB	THM_MB_THM_1	THM	4	Inhibitory/non-telencephalic neurons	1013	0.738401	GSM6027815
2822	B2	GSE200290	h1930001	MD	BS	1			THM-MB	THM_MB_THM_1	THM	4	Inhibitory/non-telencephalic neurons	1367	0.705925	GSM6027817
2823	B2	GSE200290	h1930001	MD	BS	1			THM-MB	THM_MB_THM_3	THM	4	Inhibitory/non-telencephalic neurons	1408	0.722656	GSM6027822
2824	B2	GSE200290	h1930001	MD	BS	1			THM-MB	THM_MB_THM_1	THM	4	Inhibitory/non-telencephalic neurons	1087	0.75161	GSM6027823
2825	B2	GSE200290	h1930001	MD	BS	1			THM-MB	THM_MB_THM_0	THM	4	Inhibitory/non-telencephalic neurons	887	0.729425	GSM6027824
2826	B2	GSE200290	h1930001	MD	BS	1			THM-MB	THM_MB_THM_3	THM	4	Inhibitory/non-telencephalic neurons	1037	0.747348	GSM6027827
2827	B2	GSE200290	h1930001	MD	BS	1			THM-MB	THM_MB_THM_3	THM	4	Inhibitory/non-telencephalic neurons	1009	0.719524	GSM6027828
2828	B2	GSE200290	h1930001	MD	BS	1			THM-MB	THM_MB_THM_3	THM	4	Inhibitory/non-telencephalic neurons	1149	0.693647	GSM6027829
2829	B2	GSE200290	h1930001	MD	BS	1			THM-MB	THM_MB_THM_0	THM	4	Inhibitory/non-telencephalic neurons	905	0.681768	GSM6027831
2830	B2	GSE200290	h1930001	MD	BS	1			THM-MB	THM_MB_THM_1	THM	4	Inhibitory/non-telencephalic neurons	1011	0.736894	GSM6027832
2831	B2	GSE200290	h1930001	MD	BS	1			THM-MB	THM_MB_THM_0	THM	4	Inhibitory/non-telencephalic neurons	1125	0.736889	GSM6027834
2832	B2	GSE200290	h1930001	MD	BS	1			THM-MB	THM_MB_THM_1	THM	4	Inhibitory/non-telencephalic neurons	941	0.772582	GSM6027835
2833	B2	GSE200290	h1930001	MD	BS	1			THM-MB	THM_MB_THM_1	THM	4	Inhibitory/non-telencephalic neurons	1115	0.738117	GSM6027836
2834	B2	GSE200290	h1930001	MD	BS	1			THM-MB	THM_MB_THM_1	THM	4	Inhibitory/non-telencephalic neurons	1152	0.721354	GSM6027838
2835	B2	GSE200290	h1930001	MD	BS	1			THM-MB	THM_MB_THM_3	THM	4	Inhibitory/non-telencephalic neurons	1087	0.736891	GSM6027840
2836	B2	GSE200290	h1930001	MD	BS	1			THM-MB	THM_MB_THM_1	THM	4	Inhibitory/non-telencephalic neurons	1112	0.715378	GSM6027841
2837	B2	GSE200290	h1930001	MD	BS	1			THM-MB	THM_MB_THM_1	THM	4	Inhibitory/non-telencephalic neurons	997	0.757773	GSM6027842
2838	B2	GSE200290	h1930001	MD	BS	1			THM-MB	THM_MB_THM_1	THM	4	Inhibitory/non-telencephalic neurons	1175	0.673617	GSM6027845
2839	B2	GSE200290	h1930001	MD	BS	1			THM-MB	THM_MB_THM_1	THM	4	Inhibitory/non-telencephalic neurons	921	0.729642	GSM6027846
2840	B2	GSE200290	h1930001	MD	BS	1			THM-MB	THM_MB_THM_3	THM	4	Inhibitory/non-telencephalic neurons	1032	0.75969	GSM6027847
2841	B2	GSE200290	h1930001	MD	BS	1			THM-MB	THM_MB_THM_1	THM	4	Inhibitory/non-telencephalic neurons	820	0.732927	GSM6027849
2842	B2	GSE200290	h1930001	MD	BS	1			THM-MB	THM_MB_THM_1	THM	4	Inhibitory/non-telencephalic neurons	981	0.775739	GSM6027850
2843	B2	GSE200290	h1930001	MD	BS	1			THM-MB	THM_MB_THM_1	THM	4	Inhibitory/non-telencephalic neurons	1158	0.784974	GSM6027851
2844	B2	GSE200290	h1930001	MD	BS	1			THM-MB	THM_MB_THM_1	THM	4	Inhibitory/non-telencephalic neurons	1086	0.690608	GSM6027853
2845	B2	GSE200290	h1930001	MD	BS	1			THM-MB	THM_MB_THM_1	THM	4	Inhibitory/non-telencephalic neurons	1197	0.748538	GSM6027856
2846	B2	GSE200290	h1930001	MD	BS	1			THM-MB	THM_MB_THM_1	THM	4	Inhibitory/non-telencephalic neurons	942	0.72293	GSM6027858
2847	B2	GSE200290	h1930001	MD	BS	1			THM-MB	THM_MB_THM_3	THM	4	Inhibitory/non-telencephalic neurons	906	0.699227	GSM6027859
2848	B2	GSE200290	h1930001	MD	BS	1			THM-MB	THM_MB_THM_3	THM	4	Inhibitory/non-telencephalic neurons	1193	0.729254	GSM6027866
2849	B2	GSE200290	h1930001	MD	BS	1			THM-MB	THM_MB_THM_0	THM	4	Inhibitory/non-telencephalic neurons	1000	0.703	GSM6027872
2850	B2	GSE200290	h1930001	MD	BS	1			THM-MB	THM_MB_THM_1	THM	4	Inhibitory/non-telencephalic neurons	846	0.731678	GSM6027874
2851	B2	GSE200290	h1930001	MD	BS	1			THM-MB	THM_MB_THM_1	THM	4	Inhibitory/non-telencephalic neurons	904	0.740597	GSM6027879
2852	B2	GSE200290	h1930001	MD	BS	1			THM-MB	THM_MB_THM_1	THM	4	Inhibitory/non-telencephalic neurons	865	0.764162	GSM6027880
2853	B2	GSE200290	h1930001	MD	BS	1			THM-MB	THM_MB_THM_1	THM	4	Inhibitory/non-telencephalic neurons	984	0.767276	GSM6027881
2854	B2	GSE200290	h1930001	MD	BS	1			THM-MB	THM_MB_THM_1	THM	4	Inhibitory/non-telencephalic neurons	995	0.721608	GSM6027883
2855	B2	GSE200290	h1930001	MD	BS	1			THM-MB	THM_MB_THM_1	THM	4	Inhibitory/non-telencephalic neurons	911	0.748628	GSM6027885
2856	B2	GSE200290	h1930001	MD	BS	1			THM-MB	THM_MB_THM_1	THM	4	Inhibitory/non-telencephalic neurons	1075	0.72093	GSM6027887
2857	B2	GSE200290	h1930001	MD	BS	1			THM-MB	THM_MB_THM_1	THM	4	Inhibitory/non-telencephalic neurons	1101	0.760218	GSM6027888
2858	B2	GSE200290	h1930001	MD	BS	1			THM-MB	THM_MB_THM_1	THM	4	Inhibitory/non-telencephalic neurons	863	0.706837	GSM6027890
2859	B2	GSE200290	h1930001	MD	BS	1			THM-MB	THM_MB_THM_1	THM	4	Inhibitory/non-telencephalic neurons	1050	0.712381	GSM6027892
2860	B2	GSE200290	h1930001	MD	BS	1			THM-MB	THM_MB_THM_3	THM	4	Inhibitory/non-telencephalic neurons	867	0.685121	GSM6027894
2861	B2	GSE200290	h1930001	MD	BS	1			THM-MB	THM_MB_THM_1	THM	4	Inhibitory/non-telencephalic neurons	1091	0.775435	GSM6027897
2862	B2	GSE200290	h1930001	MD	BS	1			THM-MB	THM_MB_THM_1	THM	4	Inhibitory/non-telencephalic neurons	973	0.775437	GSM6027899
2863	B2	GSE200290	h1930001	MD	BS	1			THM-MB	THM_MB_THM_3	THM	4	Inhibitory/non-telencephalic neurons	967	0.7394	GSM6027900
2864	B2	GSE200290	h1930001	MD	BS	1			THM-MB	THM_MB_THM_0	THM	4	Inhibitory/non-telencephalic neurons	1154	0.733102	GSM6027903
2865	B2	GSE200290	h1930001	MD	BS	1			THM-MB	THM_MB_THM_1	THM	4	Inhibitory/non-telencephalic neurons	971	0.760041	GSM6027906
2866	B2	GSE200290	h1930001	MD	BS	1			THM-MB	THM_MB_THM_1	THM	4	Inhibitory/non-telencephalic neurons	960	0.721875	GSM6027909
2867	B2	GSE200290	h1930001	MD	BS	1			THM-MB	THM_MB_THM_3	THM	4	Inhibitory/non-telencephalic neurons	1009	0.725471	GSM6027910
2868	B2	GSE200290	h1930001	MD	BS	1			THM-MB	THM_MB_THM_1	THM	4	Inhibitory/non-telencephalic neurons	989	0.719919	GSM6027912
2869	B2	GSE200290	h1930001	MD	BS	1			THM-MB	THM_MB_THM_1	THM	4	Inhibitory/non-telencephalic neurons	1017	0.74238	GSM6027917
2870	B2	GSE200290	h1930001	MD	BS	1			THM-MB	THM_MB_THM_1	THM	4	Inhibitory/non-telencephalic neurons	1019	0.783121	GSM6027923
2871	B2	GSE200290	h1930001	MD	BS	1			THM-MB	THM_MB_THM_1	THM	4	Inhibitory/non-telencephalic neurons	1056	0.778409	GSM6027925
2872	B2	GSE200290	h1930001	MD	BS	1			THM-MB	THM_MB_THM_1	THM	4	Inhibitory/non-telencephalic neurons	936	0.757479	GSM6027927
2873	B2	GSE200290	h1930001	MD	BS	1			THM-MB	THM_MB_THM_1	THM	4	Inhibitory/non-telencephalic neurons	954	0.749476	GSM6027929
2874	B2	GSE200290	h1930001	MD	BS	1			THM-MB	THM_MB_THM_1	THM	4	Inhibitory/non-telencephalic neurons	974	0.727926	GSM6027930
2875	B2	GSE200290	h1930001	MD	BS	1			THM-MB	THM_MB_THM_1	THM	4	Inhibitory/non-telencephalic neurons	891	0.73064	GSM6027932
2876	B2	GSE200290	h1930001	MD	BS	1			THM-MB	THM_MB_THM_3	THM	4	Inhibitory/non-telencephalic neurons	1144	0.729458	GSM6027933
2877	B2	GSE200290	h1930001	MD	BS	1			THM-MB	THM_MB_THM_3	THM	4	Inhibitory/non-telencephalic neurons	971	0.738414	GSM6027934
2878	B2	GSE200290	h1930001	MD	BS	1			THM-MB	THM_MB_THM_1	THM	4	Inhibitory/non-telencephalic neurons	829	0.750302	GSM6027936
2879	B2	GSE200290	h1930001	MD	BS	1			THM-MB	THM_MB_THM_1	THM	4	Inhibitory/non-telencephalic neurons	1119	0.789395	GSM6027938
2880	B2	GSE200290	h1930001	MD	BS	1			THM-MB	THM_MB_THM_1	THM	4	Inhibitory/non-telencephalic neurons	1041	0.795869	GSM6027940
2881	B2	GSE200290	h1930001	MD	BS	1			THM-MB	THM_MB_THM_1	THM	4	Inhibitory/non-telencephalic neurons	1132	0.728799	GSM6027941
2882	B2	GSE200290	h1930001	MD	BS	1			THM-MB	THM_MB_THM_1	THM	4	Inhibitory/non-telencephalic neurons	1037	0.747348	GSM6027943
2883	B2	GSE200290	h1930001	MD	BS	1			THM-MB	THM_MB_THM_1	THM	4	Inhibitory/non-telencephalic neurons	955	0.732984	GSM6027947
2884	B2	GSE200290	h1930001	MD	BS	1			THM-MB	THM_MB_THM_3	THM	4	Inhibitory/non-telencephalic neurons	948	0.740506	GSM6027948
2885	B2	GSE200290	h1930001	MD	BS	1			THM-MB	THM_MB_THM_3	THM	4	Inhibitory/non-telencephalic neurons	1120	0.761607	GSM6027950
2886	B2	GSE200290	h1930001	MD	BS	1			THM-MB	THM_MB_THM_1	THM	4	Inhibitory/non-telencephalic neurons	1111	0.693969	GSM6027953
2887	B2	GSE200290	h1930001	MD	BS	1			THM-MB	THM_MB_THM_1	THM	4	Inhibitory/non-telencephalic neurons	1024	0.754395	GSM6027956
2888	B2	GSE200290	h1930001	MD	BS	1			THM-MB	THM_MB_THM_1	THM	4	Inhibitory/non-telencephalic neurons	930	0.752688	GSM6027957
2889	B2	GSE200290	h1930001	MD	BS	1			THM-MB	THM_MB_THM_1	THM	4	Inhibitory/non-telencephalic neurons	1038	0.755299	GSM6027959
2890	B2	GSE200290	h1930001	MD	BS	1			THM-MB	THM_MB_THM_1	THM	4	Inhibitory/non-telencephalic neurons	845	0.76568	GSM6027960
2891	B2	GSE200290	h1930001	MD	BS	1			THM-MB	THM_MB_THM_2	THM	4	Inhibitory/non-telencephalic neurons	1087	0.762036	GSM6027961
2892	B2	GSE200290	h1930001	MD	BS	1			THM-MB	THM_MB_THM_3	THM	4	Inhibitory/non-telencephalic neurons	980	0.753061	GSM6027963
2893	B2	GSE200290	h1930001	MD	BS	1			THM-MB	THM_MB_THM_0	THM	4	Inhibitory/non-telencephalic neurons	1039	0.720885	GSM6027964
2894	B2	GSE200290	h1930001	MD	BS	1			THM-MB	THM_MB_THM_1	THM	4	Inhibitory/non-telencephalic neurons	1051	0.762131	GSM6027966
2895	B2	GSE200290	h1930001	MD	BS	1			THM-MB	THM_MB_THM_1	THM	4	Inhibitory/non-telencephalic neurons	995	0.778894	GSM6027970
2896	B2	GSE200290	h1930001	MD	BS	1			THM-MB	THM_MB_THM_1	THM	4	Inhibitory/non-telencephalic neurons	974	0.722793	GSM6027972
2897	B2	GSE200290	h1930001	MD	BS	1			THM-MB	THM_MB_THM_1	THM	4	Inhibitory/non-telencephalic neurons	1172	0.725256	GSM6027974
2898	B2	GSE200290	h1930001	MD	BS	1			THM-MB	THM_MB_THM_1	THM	4	Inhibitory/non-telencephalic neurons	947	0.734952	GSM6027976
2899	B2	GSE200290	h1930001	MD	BS	1			THM-MB	THM_MB_THM_1	THM	4	Inhibitory/non-telencephalic neurons	911	0.744786	GSM6027977
2900	B2	GSE200290	h1930001	MD	BS	1			THM-MB	THM_MB_THM_1	THM	4	Inhibitory/non-telencephalic neurons	984	0.774898	GSM6027978
2901	B2	GSE200290	h1930001	MD	BS	1			THM-MB	THM_MB_THM_1	THM	4	Inhibitory/non-telencephalic neurons	952	0.727941	GSM6027982
2902	B2	GSE200290	h1930001	MD	BS	1			THM-MB	THM_MB_THM_1	THM	4	Inhibitory/non-telencephalic neurons	1110	0.728829	GSM6027983
2903	B2	GSE200290	h1930001	MD	BS	1			THM-MB	THM_MB_THM_1	THM	4	Inhibitory/non-telencephalic neurons	951	0.714511	GSM6027984
2904	B2	GSE200290	h1930001	MD	BS	1			THM-MB	THM_MB_THM_3	THM	4	Inhibitory/non-telencephalic neurons	900	0.731111	GSM6027989
2905	B2	GSE200290	h1930001	MD	BS	1			THM-MB	THM_MB_THM_1	THM	4	Inhibitory/non-telencephalic neurons	1159	0.724763	GSM6027990
2906	B2	GSE200290	h1930001	MD	BS	1			THM-MB	THM_MB_THM_1	THM	4	Inhibitory/non-telencephalic neurons	1314	0.753425	GSM6027991
2907	B2	GSE200290	h1930001	MD	BS	1			THM-MB	THM_MB_THM_1	THM	4	Inhibitory/non-telencephalic neurons	1115	0.696413	GSM6027993
2908	B2	GSE200290	h1930001	MD	BS	1			THM-MB	THM_MB_THM_1	THM	4	Inhibitory/non-telencephalic neurons	1071	0.671335	GSM6027994
2909	B2	GSE200290	h1930001	MD	BS	1			THM-MB	THM_MB_THM_1	THM	4	Inhibitory/non-telencephalic neurons	891	0.722783	GSM6027995
2910	B2	GSE200290	h1930001	MD	BS	1			THM-MB	THM_MB_THM_1	THM	4	Inhibitory/non-telencephalic neurons	1126	0.779307	GSM6027996
2911	B2	GSE200290	h1930001	MD	BS	1			THM-MB	THM_MB_THM_3	THM	4	Inhibitory/non-telencephalic neurons	1145	0.742358	GSM6027997
2912	B2	GSE200290	h1930001	MD	BS	1			THM-MB	THM_MB_THM_1	THM	4	Inhibitory/non-telencephalic neurons	935	0.726203	GSM6027999
2913	B2	GSE200290	h1930001	MD	BS	1			THM-MB	THM_MB_THM_1	THM	4	Inhibitory/non-telencephalic neurons	1170	0.664957	GSM6028001
2914	B2	GSE200290	h1930001	MD	BS	1			THM-MB	THM_MB_THM_1	THM	4	Inhibitory/non-telencephalic neurons	1008	0.739087	GSM6028002
2915	B2	GSE200290	h1930001	MD	BS	1			THM-MB	THM_MB_THM_1	THM	4	Inhibitory/non-telencephalic neurons	877	0.750855	GSM6028003
2916	B2	GSE200290	h1930001	MD	BS	1			THM-MB	THM_MB_THM_1	THM	4	Inhibitory/non-telencephalic neurons	1082	0.771719	GSM6028006
2917	B2	GSE200290	h1930001	MD	BS	1			THM-MB	THM_MB_THM_1	THM	4	Inhibitory/non-telencephalic neurons	1033	0.745402	GSM6028007
2918	B2	GSE200290	h1930001	MD	BS	1			THM-MB	THM_MB_THM_1	THM	4	Inhibitory/non-telencephalic neurons	1118	0.737925	GSM6028008
2919	B2	GSE200290	h1930001	MD	BS	1			THM-MB	THM_MB_THM_1	THM	4	Inhibitory/non-telencephalic neurons	1005	0.699005	GSM6028011
2920	B2	GSE200290	h1930001	MD	BS	1			THM-MB	THM_MB_THM_3	THM	4	Inhibitory/non-telencephalic neurons	1001	0.736264	GSM6028012
2921	B2	GSE200290	h1930001	MD	BS	1			THM-MB	THM_MB_THM_1	THM	4	Inhibitory/non-telencephalic neurons	1148	0.703833	GSM6028014
2922	B2	GSE200290	h1930001	MD	BS	1			THM-MB	THM_MB_THM_1	THM	4	Inhibitory/non-telencephalic neurons	1010	0.756436	GSM6028015
2923	B2	GSE200290	h1930001	MD	BS	1			THM-MB	THM_MB_THM_1	THM	4	Inhibitory/non-telencephalic neurons	1044	0.744253	GSM6028016
2924	B2	GSE200290	h1930001	MD	BS	1			THM-MB	THM_MB_THM_1	THM	4	Inhibitory/non-telencephalic neurons	994	0.758551	GSM6028017
2925	B2	GSE200290	h1930001	MD	BS	1			THM-MB	THM_MB_THM_3	THM	4	Inhibitory/non-telencephalic neurons	908	0.730176	GSM6028018
2926	B2	GSE200290	h1930001	MD	BS	1			THM-MB	THM_MB_THM_3	THM	4	Inhibitory/non-telencephalic neurons	981	0.712538	GSM6028019
2927	B2	GSE200290	h1930001	MD	BS	1			THM-MB	THM_MB_THM_3	THM	4	Inhibitory/non-telencephalic neurons	1014	0.744576	GSM6028020
2928	B2	GSE200290	h1930001	MD	BS	1			THM-MB	THM_MB_THM_1	THM	4	Inhibitory/non-telencephalic neurons	986	0.73073	GSM6028022
2929	B2	GSE200290	h1930001	MD	BS	1			THM-MB	THM_MB_THM_1	THM	4	Inhibitory/non-telencephalic neurons	1212	0.761551	GSM6028024
2930	B2	GSE200290	h1930001	MD	BS	1			THM-MB	THM_MB_THM_1	THM	4	Inhibitory/non-telencephalic neurons	949	0.661749	GSM6028026
2931	B2	GSE200290	h1930001	MD	BS	1			THM-MB	THM_MB_THM_1	THM	4	Inhibitory/non-telencephalic neurons	948	0.759494	GSM6028029
2932	B2	GSE200290	h1930001	MD	BS	1			THM-MB	THM_MB_THM_1	THM	4	Inhibitory/non-telencephalic neurons	1050	0.755238	GSM6028032
2933	B2	GSE200290	h1930001	MD	BS	1			THM-MB	THM_MB_THM_1	THM	4	Inhibitory/non-telencephalic neurons	878	0.747153	GSM6028035
2934	B2	GSE200290	h1930001	MD	BS	1			THM-MB	THM_MB_THM_1	THM	4	Inhibitory/non-telencephalic neurons	1112	0.740108	GSM6028036
2935	B2	GSE200290	h1930001	MD	BS	1			THM-MB	THM_MB_THM_1	THM	4	Inhibitory/non-telencephalic neurons	1241	0.764706	GSM6028037
2936	B2	GSE200290	h1930001	MD	BS	1			THM-MB	THM_MB_THM_1	THM	4	Inhibitory/non-telencephalic neurons	945	0.703704	GSM6028038
2937	B2	GSE200290	h1930001	MD	BS	1			THM-MB	THM_MB_THM_3	THM	4	Inhibitory/non-telencephalic neurons	1145	0.747598	GSM6028040
2938	B2	GSE200290	h1930001	MD	BS	1			THM-MB	THM_MB_THM_1	THM	4	Inhibitory/non-telencephalic neurons	1087	0.73873	GSM6028041
2939	B2	GSE200290	h1930001	MD	BS	1			THM-MB	THM_MB_THM_1	THM	4	Inhibitory/non-telencephalic neurons	899	0.720801	GSM6028042
2940	B2	GSE200290	h1930001	MD	BS	1			THM-MB	THM_MB_THM_1	THM	4	Inhibitory/non-telencephalic neurons	1045	0.776077	GSM6028046
2941	B2	GSE200290	h1930001	MD	BS	1			THM-MB	THM_MB_THM_1	THM	4	Inhibitory/non-telencephalic neurons	918	0.712418	GSM6028047
2942	B2	GSE200290	h1930001	MD	BS	1			THM-MB	THM_MB_THM_1	THM	4	Inhibitory/non-telencephalic neurons	1096	0.745438	GSM6028051
2943	B2	GSE200290	h1930001	MD	BS	1			THM-MB	THM_MB_THM_1	THM	4	Inhibitory/non-telencephalic neurons	1034	0.70648	GSM6028052
2944	B2	GSE200290	h1930001	MD	BS	1			THM-MB	THM_MB_THM_1	THM	4	Inhibitory/non-telencephalic neurons	1110	0.703604	GSM6028053
2945	B2	GSE200290	h1930001	MD	BS	1			THM-MB	THM_MB_THM_1	THM	4	Inhibitory/non-telencephalic neurons	1110	0.743243	GSM6028055
2946	B2	GSE200290	h1930001	MD	BS	1			THM-MB	THM_MB_THM_1	THM	4	Inhibitory/non-telencephalic neurons	1152	0.763021	GSM6028056
2947	B2	GSE200290	h1930001	MD	BS	1			THM-MB	THM_MB_THM_3	THM	4	Inhibitory/non-telencephalic neurons	867	0.764706	GSM6028059
2948	B2	GSE200290	h1930001	MD	BS	1			THM-MB	THM_MB_THM_1	THM	4	Inhibitory/non-telencephalic neurons	1124	0.728648	GSM6028061
2949	B2	GSE200290	h1930001	MD	BS	1			THM-MB	THM_MB_THM_1	THM	4	Inhibitory/non-telencephalic neurons	988	0.732794	GSM6028062
2950	B2	GSE200290	h1930001	MD	BS	1			THM-MB	THM_MB_THM_3	THM	4	Inhibitory/non-telencephalic neurons	1080	0.735648	GSM6028064
2951	B2	GSE200290	h1930001	MD	BS	1			THM-MB	THM_MB_THM_1	THM	4	Inhibitory/non-telencephalic neurons	1002	0.729541	GSM6028065
2952	B2	GSE200290	h1930001	MD	BS	1			THM-MB	THM_MB_THM_1	THM	4	Inhibitory/non-telencephalic neurons	1292	0.738003	GSM6028068
2953	B2	GSE200290	h1930001	MD	BS	1			THM-MB	THM_MB_THM_1	THM	4	Inhibitory/non-telencephalic neurons	1128	0.757092	GSM6028069
2954	B2	GSE200290	h1930001	MD	BS	1			THM-MB	THM_MB_THM_1	THM	4	Inhibitory/non-telencephalic neurons	1050	0.725714	GSM6028071
2955	B2	GSE200290	h1930001	MD	BS	1			THM-MB	THM_MB_THM_1	THM	4	Inhibitory/non-telencephalic neurons	1110	0.716216	GSM6028075
2956	B2	GSE200290	h1930001	MD	BS	1			THM-MB	THM_MB_THM_3	THM	4	Inhibitory/non-telencephalic neurons	1145	0.724017	GSM6028076
2957	B2	GSE200290	h1930001	MD	BS	1			THM-MB	THM_MB_THM_3	THM	4	Inhibitory/non-telencephalic neurons	1126	0.738455	GSM6028077
2958	B2	GSE200290	h1930001	MD	BS	1			THM-MB	THM_MB_THM_3	THM	4	Inhibitory/non-telencephalic neurons	1220	0.666393	GSM6028079
2959	B2	GSE200290	h1930001	MD	BS	1			THM-MB	THM_MB_THM_1	THM	4	Inhibitory/non-telencephalic neurons	1176	0.719388	GSM6028081
2960	B2	GSE200290	h1930001	MD	BS	1			THM-MB	THM_MB_THM_1	THM	4	Inhibitory/non-telencephalic neurons	1037	0.742527	GSM6028085
2961	B2	GSE200290	h1930001	MD	BS	1			THM-MB	THM_MB_THM_1	THM	4	Inhibitory/non-telencephalic neurons	1236	0.763754	GSM6028087
2962	B2	GSE200290	h1930001	MD	BS	1			THM-MB	THM_MB_THM_3	THM	4	Inhibitory/non-telencephalic neurons	1263	0.743468	GSM6028088
2963	B2	GSE200290	h1930001	MD	BS	1			THM-MB	THM_MB_THM_1	THM	4	Inhibitory/non-telencephalic neurons	1000	0.723	GSM6028090
2964	B2	GSE200290	h1930001	MD	BS	1			THM-MB	THM_MB_THM_3	THM	4	Inhibitory/non-telencephalic neurons	973	0.729702	GSM6028091
2965	B2	GSE200290	h1930001	MD	BS	1			THM-MB	THM_MB_THM_1	THM	4	Inhibitory/non-telencephalic neurons	938	0.729211	GSM6028092
2966	B2	GSE200290	h1930001	MD	BS	1			THM-MB	THM_MB_THM_3	THM	4	Inhibitory/non-telencephalic neurons	1153	0.690084	GSM6028095
2967	B2	GSE200290	h1930001	MD	BS	1			THM-MB	THM_MB_THM_1	THM	4	Inhibitory/non-telencephalic neurons	967	0.718718	GSM6028098
2968	B2	GSE200290	h1930001	MD	BS	1			THM-MB	THM_MB_THM_1	THM	4	Inhibitory/non-telencephalic neurons	2406	0.584303	GSM6028099
2969	B2	GSE200290	h1930001	MD	BS	1			THM-MB	THM_MB_THM_1	THM	4	Inhibitory/non-telencephalic neurons	907	0.753032	GSM6028100
2970	B2	GSE200290	h1930001	MD	BS	1			THM-MB	THM_MB_THM_3	THM	4	Inhibitory/non-telencephalic neurons	995	0.681407	GSM6028101
2971	B2	GSE200290	h1930001	MD	BS	1			THM-MB	THM_MB_THM_1	THM	4	Inhibitory/non-telencephalic neurons	970	0.758763	GSM6028102
2972	B2	GSE200290	h1930001	MD	BS	1			THM-MB	THM_MB_THM_1	THM	4	Inhibitory/non-telencephalic neurons	962	0.740125	GSM6028103
2973	B2	GSE200290	h1930001	MD	BS	1			THM-MB	THM_MB_THM_1	THM	4	Inhibitory/non-telencephalic neurons	1161	0.719208	GSM6028104
2974	B2	GSE200290	h1930001	MD	BS	1			THM-MB	THM_MB_THM_1	THM	4	Inhibitory/non-telencephalic neurons	1142	0.779335	GSM6028105
2975	B2	GSE200290	h1930001	MD	BS	1			THM-MB	THM_MB_THM_1	THM	4	Inhibitory/non-telencephalic neurons	944	0.716102	GSM6028107
2976	B2	GSE200290	h1930001	MD	BS	1			THM-MB	THM_MB_THM_1	THM	4	Inhibitory/non-telencephalic neurons	1130	0.770796	GSM6028111
2977	B2	GSE200290	h1930001	MD	BS	1			THM-MB	THM_MB_THM_1	THM	4	Inhibitory/non-telencephalic neurons	1108	0.74639	GSM6028115
2978	B2	GSE200290	h1930001	MD	BS	1			THM-MB	THM_MB_THM_3	THM	4	Inhibitory/non-telencephalic neurons	948	0.694093	GSM6028116
2979	B2	GSE200290	h1930001	MD	BS	1			THM-MB	THM_MB_THM_1	THM	4	Inhibitory/non-telencephalic neurons	1015	0.775534	GSM6028119
2980	B2	GSE200290	h1930001	MD	BS	1			THM-MB	THM_MB_THM_1	THM	4	Inhibitory/non-telencephalic neurons	976	0.745902	GSM6028120
2981	B2	GSE200290	h1930001	MD	BS	1			THM-MB	THM_MB_THM_1	THM	4	Inhibitory/non-telencephalic neurons	1018	0.701375	GSM6028123
2982	B2	GSE200290	h1930001	MD	BS	1			THM-MB	THM_MB_THM_1	THM	4	Inhibitory/non-telencephalic neurons	1008	0.764881	GSM6028124
2983	B2	GSE200290	h1930001	MD	BS	1			THM-MB	THM_MB_THM_1	THM	4	Inhibitory/non-telencephalic neurons	1282	0.75013	GSM6028127
2984	B2	GSE200290	h1930001	MD	BS	1			THM-MB	THM_MB_THM_1	THM	4	Inhibitory/non-telencephalic neurons	1217	0.768283	GSM6028128
2985	B2	GSE200290	h1930001	MD	BS	1			THM-MB	THM_MB_THM_1	THM	4	Inhibitory/non-telencephalic neurons	1142	0.726357	GSM6028131
2986	B2	GSE200290	h1930001	MD	BS	1			THM-MB	THM_MB_THM_3	THM	4	Inhibitory/non-telencephalic neurons	1007	0.709533	GSM6028132
2987	B2	GSE200290	h1930001	MD	BS	1			THM-MB	THM_MB_THM_1	THM	4	Inhibitory/non-telencephalic neurons	1170	0.747863	GSM6028139
2988	B2	GSE200290	h1930001	MD	BS	1			THM-MB	THM_MB_THM_1	THM	4	Inhibitory/non-telencephalic neurons	1229	0.765663	GSM6028140
2989	B2	GSE200290	h1930001	MD	BS	1			THM-MB	THM_MB_THM_1	THM	4	Inhibitory/non-telencephalic neurons	1127	0.76575	GSM6028143
2990	B2	GSE200290	h1930001	MD	BS	1			THM-MB	THM_MB_THM_1	THM	4	Inhibitory/non-telencephalic neurons	1172	0.745307	GSM6028144
2991	B2	GSE200290	h1930001	MD	BS	1			THM-MB	THM_MB_THM_1	THM	4	Inhibitory/non-telencephalic neurons	1135	0.744493	GSM6028148
2992	B2	GSE200290	h1930001	MD	BS	1			Vip	Vip_0	Vip	11	Inhibitory/non-telencephalic neurons	1058	0.569313	GSM6027541
2993	B2	GSE200290	h1930001	MD	BS	1			Vip	Vip_0	Vip	11	Inhibitory/non-telencephalic neurons	989	0.639029	GSM6027670
2994	B2	GSE200290	h1930001	MD	BS	1			Vip	Vip_2	Vip	11	Inhibitory/non-telencephalic neurons	787	0.682338	GSM6027871
2995	B2	GSE200290	h1930001	MD	BS	1			ASC	ASC_3	NN	20.1	Non-neuronal Cells	978	0.539877	GSM6027757
2996	B2	GSE200290	h1930001	MD	BS	1			ASC	ASC_3	NN	20.1	Non-neuronal Cells	1142	0.519702	GSM6027761
2997	B2	GSE200290	h1930001	MD	BS	1			ASC	ASC_3	NN	20.1	Non-neuronal Cells	1066	0.525016	GSM6027770
2998	B2	GSE200290	h1930001	MD	BS	1			MGC	MGC_0	NN	20	Non-neuronal Cells	1079	0.616775	GSM6027819
2999	B2	GSE200290	h1930001	MD	BS	1			MGC	MGC_0	NN	20	Non-neuronal Cells	1203	0.659185	GSM6027855
3000	B2	GSE200290	h1930001	MD	BS	1			MGC	MGC_0	NN	20	Non-neuronal Cells	1148	0.625	GSM6027867
3001	B2	GSE200290	h1930001	MD	BS	1			ODC	ODC_0	NN	20.3	Non-neuronal Cells	889	0.43982	GSM6027497
3002	B2	GSE200290	h1930001	MD	BS	1			ODC	ODC_1	NN	20.3	Non-neuronal Cells	1027	0.491723	GSM6027527
3003	B2	GSE200290	h1930001	MD	BS	1			ODC	ODC_1	NN	20.3	Non-neuronal Cells	1021	0.532811	GSM6027545
3004	B2	GSE200290	h1930001	MD	BS	1			ODC	ODC_1	NN	20.3	Non-neuronal Cells	1061	0.460886	GSM6027582
3005	B2	GSE200290	h1930001	MD	BS	1			ODC	ODC_1	NN	20.3	Non-neuronal Cells	1062	0.491525	GSM6027610
3006	B2	GSE200290	h1930001	MD	BS	1			ODC	ODC_0	NN	20.3	Non-neuronal Cells	1222	0.463175	GSM6027633
3007	B2	GSE200290	h1930001	MD	BS	1			ODC	ODC_0	NN	20.3	Non-neuronal Cells	1227	0.514262	GSM6027707
3008	B2	GSE200290	h1930001	MD	BS	1			ODC	ODC_1	NN	20.3	Non-neuronal Cells	1102	0.461887	GSM6027738
3009	B2	GSE200290	h1930001	MD	BS	1			ODC	ODC_1	NN	20.3	Non-neuronal Cells	943	0.435843	GSM6027741
3010	B2	GSE200290	h1930001	MD	BS	1			ODC	ODC_1	NN	20.3	Non-neuronal Cells	1127	0.475599	GSM6027749
3011	B2	GSE200290	h1930001	MD	BS	1			ODC	ODC_1	NN	20.3	Non-neuronal Cells	965	0.489119	GSM6027750
3012	B2	GSE200290	h1930001	MD	BS	1			ODC	ODC_1	NN	20.3	Non-neuronal Cells	1083	0.575254	GSM6027754
3013	B2	GSE200290	h1930001	MD	BS	1			ODC	ODC_1	NN	20.3	Non-neuronal Cells	1100	0.462727	GSM6027758
3014	B2	GSE200290	h1930001	MD	BS	1			ODC	ODC_1	NN	20.3	Non-neuronal Cells	1298	0.447612	GSM6027762
3015	B2	GSE200290	h1930001	MD	BS	1			ODC	ODC_1	NN	20.3	Non-neuronal Cells	888	0.486486	GSM6027765
3016	B2	GSE200290	h1930001	MD	BS	1			ODC	ODC_1	NN	20.3	Non-neuronal Cells	1133	0.48632	GSM6027766
3017	B2	GSE200290	h1930001	MD	BS	1			ODC	ODC_1	NN	20.3	Non-neuronal Cells	1102	0.453721	GSM6027769
3018	B2	GSE200290	h1930001	MD	BS	1			ODC	ODC_1	NN	20.3	Non-neuronal Cells	1025	0.524878	GSM6027773
3019	B2	GSE200290	h1930001	MD	BS	1			ODC	ODC_1	NN	20.3	Non-neuronal Cells	1156	0.481834	GSM6027774
3020	B2	GSE200290	h1930001	MD	BS	1			ODC	ODC_1	NN	20.3	Non-neuronal Cells	1195	0.506276	GSM6027777
3021	B2	GSE200290	h1930001	MD	BS	1			ODC	ODC_1	NN	20.3	Non-neuronal Cells	968	0.432851	GSM6027778
3022	B2	GSE200290	h1930001	MD	BS	1			ODC	ODC_0	NN	20.3	Non-neuronal Cells	1317	0.487472	GSM6027781
3023	B2	GSE200290	h1930001	MD	BS	1			ODC	ODC_1	NN	20.3	Non-neuronal Cells	1231	0.471162	GSM6027782
3024	B2	GSE200290	h1930001	MD	BS	1			ODC	ODC_1	NN	20.3	Non-neuronal Cells	984	0.485772	GSM6027786
3025	B2	GSE200290	h1930001	MD	BS	1			ODC	ODC_1	NN	20.3	Non-neuronal Cells	1074	0.50838	GSM6027789
3026	B2	GSE200290	h1930001	MD	BS	1			ODC	ODC_0	NN	20.3	Non-neuronal Cells	1023	0.43695	GSM6027792
3027	B2	GSE200290	h1930001	MD	BS	1			ODC	ODC_1	NN	20.3	Non-neuronal Cells	1072	0.517724	GSM6027793
3028	B2	GSE200290	h1930001	MD	BS	1			ODC	ODC_1	NN	20.3	Non-neuronal Cells	1239	0.450363	GSM6027796
3029	B2	GSE200290	h1930001	MD	BS	1			ODC	ODC_1	NN	20.3	Non-neuronal Cells	859	0.555297	GSM6027797
3030	B2	GSE200290	h1930001	MD	BS	1			ODC	ODC_1	NN	20.3	Non-neuronal Cells	1269	0.483846	GSM6027826
3031	B2	GSE200290	h1930001	MD	BS	1			ODC	ODC_0	NN	20.3	Non-neuronal Cells	868	0.514977	GSM6027848
3032	B2	GSE200290	h1930001	MD	BS	1			ODC	ODC_1	NN	20.3	Non-neuronal Cells	1010	0.511881	GSM6027854
3033	B2	GSE200290	h1930001	MD	BS	1			ODC	ODC_1	NN	20.3	Non-neuronal Cells	1088	0.42739	GSM6027878
3034	B2	GSE200290	h1930001	MD	BS	1			ODC	ODC_1	NN	20.3	Non-neuronal Cells	941	0.479277	GSM6027905
3035	B2	GSE200290	h1930001	MD	BS	1			ODC	ODC_1	NN	20.3	Non-neuronal Cells	943	0.467656	GSM6027913
3036	B2	GSE200290	h1930001	MD	BS	1			ODC	ODC_1	NN	20.3	Non-neuronal Cells	1010	0.543564	GSM6027918
3037	B2	GSE200290	h1930001	MD	BS	1			ODC	ODC_0	NN	20.3	Non-neuronal Cells	1097	0.492252	GSM6027975
3038	B2	GSE200290	h1930001	MD	BS	1			ODC	ODC_1	NN	20.3	Non-neuronal Cells	981	0.442406	GSM6027988
3039	B2	GSE200290	h1930001	MD	BS	1			ODC	ODC_1	NN	20.3	Non-neuronal Cells	1331	0.446281	GSM6028034
3040	B2	GSE200290	h1930001	MD	BS	1			ODC	ODC_1	NN	20.3	Non-neuronal Cells	1367	0.469642	GSM6028049
3041	B2	GSE200290	h1930001	MD	BS	1			ODC	ODC_0	NN	20.3	Non-neuronal Cells	1160	0.442241	GSM6028067
3042	B2	GSE200290	h1930001	MD	BS	1			ODC	ODC_1	NN	20.3	Non-neuronal Cells	974	0.471253	GSM6028106
3043	B2	GSE200290	h1930001	MD	BS	1			ODC	ODC_1	NN	20.3	Non-neuronal Cells	951	0.456362	GSM6028110
3044	B2	GSE200290	h1930001	MD	BS	1			ODC	ODC_1	NN	20.3	Non-neuronal Cells	1111	0.450945	GSM6028117
3045	B2	GSE200290	h1930001	MD	BS	1			ODC	ODC_1	NN	20.3	Non-neuronal Cells	1044	0.438697	GSM6028118
3046	B2	GSE200290	h1930001	MD	BS	1			ODC	ODC_1	NN	20.3	Non-neuronal Cells	991	0.460141	GSM6028130
3047	B2	GSE200290	h1930001	MD	BS	1			ODC	ODC_1	NN	20.3	Non-neuronal Cells	1228	0.47557	GSM6028133
3048	B2	GSE200290	h1930001	MD	BS	1			ODC	ODC_1	NN	20.3	Non-neuronal Cells	960	0.4375	GSM6028142
3049	B2	GSE200290	h1930001	MD	BS	1			ODC	ODC_1	NN	20.3	Non-neuronal Cells	906	0.575055	GSM6028145
3050	B2	GSE200290	h1930001	MD	BS	1			ODC	ODC_1	NN	20.3	Non-neuronal Cells	1021	0.489226	GSM6028146
3051	B2	GSE200290	h1930001	MD	BS	1			ODC	ODC_1	NN	20.3	Non-neuronal Cells	1106	0.512658	GSM6028149
3052	B2	GSE200290	h1930001	MD	BS	1			ODC	ODC_1	NN	20.3	Non-neuronal Cells	1098	0.482696	GSM6028150
3053	B2	GSE200290	h1930001	MD	BS	1			OPC	OPC_0	NN	20.2	Non-neuronal Cells	988	0.42004	GSM6027659
3054	B2	GSE200290	h1930001	MD	BS	1			OPC	OPC_0	NN	20.2	Non-neuronal Cells	1023	0.498534	GSM6028134
3055	B2	GSE200290	h1930001	MD	BS	1			OPC	OPC_0	NN	20.2	Non-neuronal Cells	909	0.464246	GSM6028138
3056	B2	GSE200290	h1930001	MD	BS	1			PC	PC_0	NN	20	Non-neuronal Cells	1257	0.562053	GSM6028072
3057	B2	GSE200290	h1930001	MD	BS	1			VLMC	VLMC_0	NN	20	Non-neuronal Cells	1055	0.525118	GSM6027737
3058	B2	GSE200290	h1930001	MD	BS	1			L2/3-IT	L23_IT_1	L2/3-IT	19	Telencephalic excitatory neurons	1062	0.436911	GSM6027439
3059	B3	GSE230684	h1930001	CBV	cere	2			CB	CB_1	CB	3	Inhibitory/non-telencephalic neurons	905	0.540331	GSM7231252
3061	B3	GSE230684	h1930001	CBV	cere	2			CB	CB_0	CB	3	Inhibitory/non-telencephalic neurons	1313	0.584031	GSM7231256
3063	B3	GSE230684	h1930001	CBV	cere	2			CB	CB_1	CB	3	Inhibitory/non-telencephalic neurons	941	0.524973	GSM7231263
3065	B3	GSE230684	h1930001	CBV	cere	2			CB	CB_2	CB	3	Inhibitory/non-telencephalic neurons	968	0.617769	GSM7231267
3070	B3	GSE230684	h1930001	CBV	cere	2			CB	CB_1	CB	3	Inhibitory/non-telencephalic neurons	1031	0.550921	GSM7231318
3071	B3	GSE230684	h1930001	CBV	cere	2			CB	CB_2	CB	3	Inhibitory/non-telencephalic neurons	997	0.626881	GSM7231319
3072	B3	GSE230684	h1930001	CBV	cere	2			CB	CB_0	CB	3	Inhibitory/non-telencephalic neurons	1038	0.634875	GSM7231322
3073	B3	GSE230684	h1930001	CBV	cere	2			CB	CB_0	CB	3	Inhibitory/non-telencephalic neurons	1030	0.580583	GSM7231323
3074	B3	GSE230684	h1930001	CBV	cere	2			CB	CB_1	CB	3	Inhibitory/non-telencephalic neurons	994	0.530684	GSM7231326
3076	B3	GSE230684	h1930001	CBV	cere	2			CB	CB_1	CB	3	Inhibitory/non-telencephalic neurons	1060	0.545283	GSM7231330
3077	B3	GSE230684	h1930001	CBV	cere	2			CB	CB_1	CB	3	Inhibitory/non-telencephalic neurons	857	0.511085	GSM7231334
3078	B3	GSE230684	h1930001	CBV	cere	2			CB	CB_2	CB	3	Inhibitory/non-telencephalic neurons	1077	0.579387	GSM7231337
3079	B3	GSE230684	h1930001	CBV	cere	2			CB	CB_1	CB	3	Inhibitory/non-telencephalic neurons	821	0.508526	GSM7231342
3080	B3	GSE230684	h1930001	CBV	cere	2			CB	CB_0	CB	3	Inhibitory/non-telencephalic neurons	1771	0.540373	GSM7231349
3083	B3	GSE230684	h1930001	CBV	cere	2			CB	CB_1	CB	3	Inhibitory/non-telencephalic neurons	994	0.550302	GSM7231357
3085	B3	GSE230684	h1930001	CBV	cere	2			CB	CB_0	CB	3	Inhibitory/non-telencephalic neurons	800	0.5225	GSM7231363
3087	B3	GSE230684	h1930001	CBV	cere	2			CB	CB_1	CB	3	Inhibitory/non-telencephalic neurons	849	0.534747	GSM7231370
3088	B3	GSE230684	h1930001	CBV	cere	2			CB	CB_0	CB	3	Inhibitory/non-telencephalic neurons	980	0.561224	GSM7231373
3089	B3	GSE230684	h1930001	CBV	cere	2			CB	CB_1	CB	3	Inhibitory/non-telencephalic neurons	857	0.548425	GSM7231374
3091	B3	GSE230684	h1930001	CBV	cere	2			CB	CB_0	CB	3	Inhibitory/non-telencephalic neurons	996	0.550201	GSM7231381
3092	B3	GSE230684	h1930001	CBV	cere	2			CB	CB_1	CB	3	Inhibitory/non-telencephalic neurons	873	0.542955	GSM7231384
3094	B3	GSE230684	h1930001	CBV	cere	2			CB	CB_1	CB	3	Inhibitory/non-telencephalic neurons	1113	0.540881	GSM7231386
3095	B3	GSE230684	h1930001	CBV	cere	2			CB	CB_1	CB	3	Inhibitory/non-telencephalic neurons	828	0.553744	GSM7231389
3102	B3	GSE230684	h1930001	CBV	cere	2			CB	CB_0	CB	3	Inhibitory/non-telencephalic neurons	893	0.569429	GSM7231425
3104	B3	GSE230684	h1930001	CBV	cere	2			CB	CB_0	CB	3	Inhibitory/non-telencephalic neurons	802	0.546135	GSM7231429
3106	B3	GSE230684	h1930001	CBV	cere	2			CB	CB_1	CB	3	Inhibitory/non-telencephalic neurons	812	0.530788	GSM7231434
3107	B3	GSE230684	h1930001	CBV	cere	2			CB	CB_0	CB	3	Inhibitory/non-telencephalic neurons	912	0.56981	GSM7231435
3108	B3	GSE230684	h1930001	CBV	cere	2			CB	CB_2	CB	3	Inhibitory/non-telencephalic neurons	816	0.579657	GSM7231436
3109	B3	GSE230684	h1930001	CBV	cere	2			CB	CB_1	CB	3	Inhibitory/non-telencephalic neurons	862	0.530742	GSM7231439
3113	B3	GSE230684	h1930001	CBV	cere	2			CB	CB_1	CB	3	Inhibitory/non-telencephalic neurons	886	0.518059	GSM7231452
3116	B3	GSE230684	h1930001	CBV	cere	2			CB	CB_0	CB	3	Inhibitory/non-telencephalic neurons	831	0.561974	GSM7231472
3117	B3	GSE230684	h1930001	CBV	cere	2			CB	CB_1	CB	3	Inhibitory/non-telencephalic neurons	1082	0.498152	GSM7231475
3118	B3	GSE230684	h1930001	CBV	cere	2			CB	CB_0	CB	3	Inhibitory/non-telencephalic neurons	955	0.53089	GSM7231478
3119	B3	GSE230684	h1930001	CBV	cere	2			CB	CB_0	CB	3	Inhibitory/non-telencephalic neurons	915	0.578142	GSM7231479
3121	B3	GSE230684	h1930001	CBV	cere	2			CB	CB_1	CB	3	Inhibitory/non-telencephalic neurons	864	0.501157	GSM7231483
3122	B3	GSE230684	h1930001	CBV	cere	2			CB	CB_2	CB	3	Inhibitory/non-telencephalic neurons	938	0.558635	GSM7231484
3123	B3	GSE230684	h1930001	CBV	cere	2			CB	CB_0	CB	3	Inhibitory/non-telencephalic neurons	1190	0.582353	GSM7231485
3124	B3	GSE230684	h1930001	CBV	cere	2			CB	CB_0	CB	3	Inhibitory/non-telencephalic neurons	1008	0.574405	GSM7231487
3125	B3	GSE230684	h1930001	CBV	cere	2			CB	CB_1	CB	3	Inhibitory/non-telencephalic neurons	880	0.521591	GSM7231488
3127	B3	GSE230684	h1930001	CBV	cere	2			CB	CB_1	CB	3	Inhibitory/non-telencephalic neurons	1194	0.510888	GSM7231490
3128	B3	GSE230684	h1930001	CBV	cere	2			CB	CB_0	CB	3	Inhibitory/non-telencephalic neurons	1108	0.595668	GSM7231491
3129	B3	GSE230684	h1930001	CBV	cere	2			CB	CB_2	CB	3	Inhibitory/non-telencephalic neurons	875	0.605714	GSM7231492
3130	B3	GSE230684	h1930001	CBV	cere	2			CB	CB_0	CB	3	Inhibitory/non-telencephalic neurons	1043	0.566155	GSM7231493
3131	B3	GSE230684	h1930001	CBV	cere	2			CB	CB_1	CB	3	Inhibitory/non-telencephalic neurons	1129	0.515943	GSM7231494
3132	B3	GSE230684	h1930001	CBV	cere	2			CB	CB_0	CB	3	Inhibitory/non-telencephalic neurons	1035	0.570531	GSM7231495
3133	B3	GSE230684	h1930001	CBV	cere	2			CB	CB_1	CB	3	Inhibitory/non-telencephalic neurons	849	0.542403	GSM7231496
3134	B3	GSE230684	h1930001	CBV	cere	2			CB	CB_1	CB	3	Inhibitory/non-telencephalic neurons	1128	0.546986	GSM7231497
3135	B3	GSE230684	h1930001	CBV	cere	2			CB	CB_1	CB	3	Inhibitory/non-telencephalic neurons	1229	0.530513	GSM7231498
3136	B3	GSE230684	h1930001	CBV	cere	2			CB	CB_1	CB	3	Inhibitory/non-telencephalic neurons	1149	0.550479	GSM7231499
3137	B3	GSE230684	h1930001	CBV	cere	2			CB	CB_1	CB	3	Inhibitory/non-telencephalic neurons	1226	0.553018	GSM7231500
3138	B3	GSE230684	h1930001	CBV	cere	2			CB	CB_1	CB	3	Inhibitory/non-telencephalic neurons	1211	0.500413	GSM7231501
3139	B3	GSE230684	h1930001	CBV	cere	2			CB	CB_1	CB	3	Inhibitory/non-telencephalic neurons	872	0.594037	GSM7231503
3140	B3	GSE230684	h1930001	CBV	cere	2			CB	CB_1	CB	3	Inhibitory/non-telencephalic neurons	867	0.544983	GSM7231506
3141	B3	GSE230684	h1930001	CBV	cere	2			CB	CB_1	CB	3	Inhibitory/non-telencephalic neurons	1012	0.517787	GSM7231507
3142	B3	GSE230684	h1930001	CBV	cere	2			CB	CB_2	CB	3	Inhibitory/non-telencephalic neurons	863	0.586327	GSM7231509
3145	B3	GSE230684	h1930001	CBV	cere	2			CB	CB_0	CB	3	Inhibitory/non-telencephalic neurons	1100	0.550909	GSM7231513
3146	B3	GSE230684	h1930001	CBV	cere	2			CB	CB_1	CB	3	Inhibitory/non-telencephalic neurons	831	0.515042	GSM7231514
3147	B3	GSE230684	h1930001	CBV	cere	2			CB	CB_1	CB	3	Inhibitory/non-telencephalic neurons	971	0.532441	GSM7231515
3148	B3	GSE230684	h1930001	CBV	cere	2			CB	CB_1	CB	3	Inhibitory/non-telencephalic neurons	977	0.553736	GSM7231516
3149	B3	GSE230684	h1930001	CBV	cere	2			CB	CB_1	CB	3	Inhibitory/non-telencephalic neurons	921	0.519001	GSM7231517
3150	B3	GSE230684	h1930001	CBV	cere	2			CB	CB_1	CB	3	Inhibitory/non-telencephalic neurons	948	0.569093	GSM7231519
3154	B3	GSE230684	h1930001	CBV	cere	2			CB	CB_0	CB	3	Inhibitory/non-telencephalic neurons	936	0.604701	GSM7231527
3155	B3	GSE230684	h1930001	CBV	cere	2			CB	CB_1	CB	3	Inhibitory/non-telencephalic neurons	1364	0.576307	GSM7231539
3156	B3	GSE230684	h1930001	CBV	cere	2			CB	CB_0	CB	3	Inhibitory/non-telencephalic neurons	855	0.575439	GSM7231540
3157	B3	GSE230684	h1930001	CBV	cere	2			CB	CB_1	CB	3	Inhibitory/non-telencephalic neurons	807	0.568773	GSM7231542
3158	B3	GSE230684	h1930001	CBV	cere	2			CB	CB_1	CB	3	Inhibitory/non-telencephalic neurons	1000	0.489	GSM7231546
3160	B3	GSE230684	h1930001	CBV	cere	2			CB	CB_0	CB	3	Inhibitory/non-telencephalic neurons	857	0.6021	GSM7231562
3161	B3	GSE230684	h1930001	CBV	cere	2			CB	CB_1	CB	3	Inhibitory/non-telencephalic neurons	909	0.533553	GSM7231566
3163	B3	GSE230684	h1930001	CBV	cere	2			CB	CB_1	CB	3	Inhibitory/non-telencephalic neurons	831	0.563177	GSM7231572
3165	B3	GSE230684	h1930001	CBV	cere	2			CB	CB_0	CB	3	Inhibitory/non-telencephalic neurons	994	0.557344	GSM7231576
3166	B3	GSE230684	h1930001	CBV	cere	2			CB	CB_0	CB	3	Inhibitory/non-telencephalic neurons	992	0.604839	GSM7231580
3167	B3	GSE230684	h1930001	CBV	cere	2			CB	CB_0	CB	3	Inhibitory/non-telencephalic neurons	1668	0.570444	GSM7231588
3168	B3	GSE230684	h1930001	CBV	cere	2			CB	CB_2	CB	3	Inhibitory/non-telencephalic neurons	794	0.580605	GSM7231594
3169	B3	GSE230684	h1930001	CBV	cere	2			CB	CB_2	CB	3	Inhibitory/non-telencephalic neurons	920	0.578261	GSM7231595
3171	B3	GSE230684	h1930001	CBV	cere	2			CB	CB_1	CB	3	Inhibitory/non-telencephalic neurons	855	0.509942	GSM7231597
3172	B3	GSE230684	h1930001	CBV	cere	2			CB	CB_1	CB	3	Inhibitory/non-telencephalic neurons	839	0.582837	GSM7231598
3173	B3	GSE230684	h1930001	CBV	cere	2			CB	CB_0	CB	3	Inhibitory/non-telencephalic neurons	926	0.547516	GSM7231600
3174	B3	GSE230684	h1930001	CBV	cere	2			CB	CB_1	CB	3	Inhibitory/non-telencephalic neurons	843	0.511269	GSM7231602
3176	B3	GSE230684	h1930001	CBV	cere	2			CB	CB_1	CB	3	Inhibitory/non-telencephalic neurons	873	0.565292	GSM7231604
3177	B3	GSE230684	h1930001	CBV	cere	2			CB	CB_1	CB	3	Inhibitory/non-telencephalic neurons	855	0.586745	GSM7231606
3181	B3	GSE230684	h1930001	CBV	cere	2			CB	CB_0	CB	3	Inhibitory/non-telencephalic neurons	871	0.591274	GSM7231614
3182	B3	GSE230684	h1930001	CBV	cere	2			CB	CB_2	CB	3	Inhibitory/non-telencephalic neurons	836	0.580144	GSM7231615
3183	B3	GSE230684	h1930001	CBV	cere	2			CB	CB_1	CB	3	Inhibitory/non-telencephalic neurons	815	0.514519	GSM7231617
3186	B3	GSE230684	h1930001	CBV	cere	2			CB	CB_0	CB	3	Inhibitory/non-telencephalic neurons	806	0.566998	GSM7231629
3189	B3	GSE230684	h1930001	CBV	cere	2			CB	CB_1	CB	3	Inhibitory/non-telencephalic neurons	941	0.579702	GSM7231634
3194	B3	GSE230684	h1930001	CBV	cere	2			CB	CB_0	CB	3	Inhibitory/non-telencephalic neurons	848	0.604953	GSM7231680
3195	B3	GSE230684	h1930001	CBV	cere	2			CB	CB_1	CB	3	Inhibitory/non-telencephalic neurons	776	0.56701	GSM7231681
3198	B3	GSE230684	h1930001	CBV	cere	2			CB	CB_1	CB	3	Inhibitory/non-telencephalic neurons	900	0.532778	GSM7231718
3199	B3	GSE230684	h1930001	CBV	cere	2			CB	CB_0	CB	3	Inhibitory/non-telencephalic neurons	1049	0.533365	GSM7231719
3200	B3	GSE230684	h1930001	CBV	cere	2			CB	CB_0	CB	3	Inhibitory/non-telencephalic neurons	1085	0.545622	GSM7231722
3201	B3	GSE230684	h1930001	CBV	cere	2			CB	CB_1	CB	3	Inhibitory/non-telencephalic neurons	1198	0.553422	GSM7231723
3203	B3	GSE230684	h1930001	CBV	cere	2			CB	CB_2	CB	3	Inhibitory/non-telencephalic neurons	994	0.619718	GSM7231751
3206	B3	GSE230684	h1930001	CBV	cere	2			CB	CB_0	CB	3	Inhibitory/non-telencephalic neurons	803	0.559153	GSM7231767
3207	B3	GSE230684	h1930001	CBV	cere	2			CB	CB_0	CB	3	Inhibitory/non-telencephalic neurons	985	0.569543	GSM7231770
3208	B3	GSE230684	h1930001	CBV	cere	2			CB	CB_1	CB	3	Inhibitory/non-telencephalic neurons	898	0.556236	GSM7231771
3209	B3	GSE230684	h1930001	CBV	cere	2			CB	CB_1	CB	3	Inhibitory/non-telencephalic neurons	915	0.478689	GSM7231774
3211	B3	GSE230684	h1930001	CBV	cere	2			CB	CB_1	CB	3	Inhibitory/non-telencephalic neurons	1040	0.567308	GSM7231781
3215	B3	GSE230684	h1930001	CBV	cere	2			CB	CB_0	CB	3	Inhibitory/non-telencephalic neurons	877	0.525656	GSM7231863
3216	B3	GSE230684	h1930001	CBV	cere	2			CB	CB_0	CB	3	Inhibitory/non-telencephalic neurons	1069	0.546773	GSM7231890
3219	B3	GSE230684	h1930001	CBV	cere	2			CB	CB_0	CB	3	Inhibitory/non-telencephalic neurons	851	0.580494	GSM7231950
3222	B3	GSE230684	h1930001	CBV	cere	2			CB	CB_1	CB	3	Inhibitory/non-telencephalic neurons	955	0.549738	GSM7231966
3223	B3	GSE230684	h1930001	CBV	cere	2			CB	CB_1	CB	3	Inhibitory/non-telencephalic neurons	866	0.540416	GSM7231969
3224	B3	GSE230684	h1930001	CBV	cere	2			CB	CB_0	CB	3	Inhibitory/non-telencephalic neurons	928	0.604526	GSM7231970
3225	B3	GSE230684	h1930001	CBV	cere	2			CB	CB_1	CB	3	Inhibitory/non-telencephalic neurons	1008	0.518849	GSM7231973
3227	B3	GSE230684	h1930001	CBV	cere	2			CB	CB_0	CB	3	Inhibitory/non-telencephalic neurons	935	0.613369	GSM7231978
3230	B3	GSE230684	h1930001	CBV	cere	2			CB	CB_0	CB	3	Inhibitory/non-telencephalic neurons	1059	0.523135	GSM7231984
3231	B3	GSE230684	h1930001	CBV	cere	2			CB	CB_2	CB	3	Inhibitory/non-telencephalic neurons	1852	0.62293	GSM7231985
3232	B3	GSE230684	h1930001	CBV	cere	2			CB	CB_1	CB	3	Inhibitory/non-telencephalic neurons	879	0.561433	GSM7231988
3233	B3	GSE230684	h1930001	CBV	cere	2			CB	CB_0	CB	3	Inhibitory/non-telencephalic neurons	868	0.59447	GSM7231992
3234	B3	GSE230684	h1930001	CBV	cere	2			CB	CB_1	CB	3	Inhibitory/non-telencephalic neurons	915	0.542077	GSM7232000
3235	B3	GSE230684	h1930001	CBV	cere	2			CB	CB_0	CB	3	Inhibitory/non-telencephalic neurons	801	0.564295	GSM7232001
3238	B3	GSE230684	h1930001	CBV	cere	2			CB	CB_2	CB	3	Inhibitory/non-telencephalic neurons	1029	0.621963	GSM7232004
3239	B3	GSE230684	h1930001	CBV	cere	2			CB	CB_0	CB	3	Inhibitory/non-telencephalic neurons	988	0.643725	GSM7232005
3240	B3	GSE230684	h1930001	CBV	cere	2			CB	CB_1	CB	3	Inhibitory/non-telencephalic neurons	900	0.518889	GSM7232006
3241	B3	GSE230684	h1930001	CBV	cere	2			CB	CB_0	CB	3	Inhibitory/non-telencephalic neurons	954	0.592243	GSM7232007
3243	B3	GSE230684	h1930001	CBV	cere	2			CB	CB_2	CB	3	Inhibitory/non-telencephalic neurons	1073	0.628145	GSM7232010
3244	B3	GSE230684	h1930001	CBV	cere	2			CB	CB_0	CB	3	Inhibitory/non-telencephalic neurons	884	0.538462	GSM7232011
3245	B3	GSE230684	h1930001	CBV	cere	2			CB	CB_0	CB	3	Inhibitory/non-telencephalic neurons	883	0.5906	GSM7232012
3246	B3	GSE230684	h1930001	CBV	cere	2			CB	CB_0	CB	3	Inhibitory/non-telencephalic neurons	940	0.561702	GSM7232013
3248	B3	GSE230684	h1930001	CBV	cere	2			CB	CB_1	CB	3	Inhibitory/non-telencephalic neurons	1013	0.523198	GSM7232017
3249	B3	GSE230684	h1930001	CBV	cere	2			CB	CB_2	CB	3	Inhibitory/non-telencephalic neurons	737	0.613297	GSM7232018
3250	B3	GSE230684	h1930001	CBV	cere	2			CB	CB_1	CB	3	Inhibitory/non-telencephalic neurons	862	0.512761	GSM7232019
3251	B3	GSE230684	h1930001	CBV	cere	2			CB	CB_0	CB	3	Inhibitory/non-telencephalic neurons	984	0.539634	GSM7232020
3254	B3	GSE230684	h1930001	CBV	cere	2			CB	CB_1	CB	3	Inhibitory/non-telencephalic neurons	878	0.482916	GSM7232028
3255	B3	GSE230684	h1930001	CBV	cere	2			CB	CB_1	CB	3	Inhibitory/non-telencephalic neurons	866	0.520785	GSM7232030
3256	B3	GSE230684	h1930001	CBV	cere	2			CB	CB_2	CB	3	Inhibitory/non-telencephalic neurons	838	0.601432	GSM7232031
3257	B3	GSE230684	h1930001	CBV	cere	2			CB	CB_1	CB	3	Inhibitory/non-telencephalic neurons	857	0.514586	GSM7232033
3258	B3	GSE230684	h1930001	CBV	cere	2			CB	CB_1	CB	3	Inhibitory/non-telencephalic neurons	1098	0.508197	GSM7232034
3259	B3	GSE230684	h1930001	CBV	cere	2			CB	CB_1	CB	3	Inhibitory/non-telencephalic neurons	1129	0.502657	GSM7232035
3260	B3	GSE230684	h1930001	CBV	cere	2			CB	CB_0	CB	3	Inhibitory/non-telencephalic neurons	920	0.543478	GSM7232037
3263	B3	GSE230684	h1930001	CBV	cere	2			CB	CB_1	CB	3	Inhibitory/non-telencephalic neurons	871	0.536739	GSM7232040
3264	B3	GSE230684	h1930001	CBV	cere	2			CB	CB_0	CB	3	Inhibitory/non-telencephalic neurons	857	0.555426	GSM7232041
3265	B3	GSE230684	h1930001	CBV	cere	2			CB	CB_1	CB	3	Inhibitory/non-telencephalic neurons	1013	0.498519	GSM7232043
3267	B3	GSE230684	h1930001	CBV	cere	2			CB	CB_1	CB	3	Inhibitory/non-telencephalic neurons	1156	0.547578	GSM7232053
3270	B3	GSE230684	h1930001	CBV	cere	2			CB	CB_0	CB	3	Inhibitory/non-telencephalic neurons	877	0.608894	GSM7232066
3273	B3	GSE230684	h1930001	CBV	cere	2			CB	CB_0	CB	3	Inhibitory/non-telencephalic neurons	823	0.54192	GSM7232083
3275	B3	GSE230684	h1930001	CBV	cere	2			CB	CB_1	CB	3	Inhibitory/non-telencephalic neurons	892	0.517937	GSM7232092
3276	B3	GSE230684	h1930001	CBV	cere	2			CB	CB_1	CB	3	Inhibitory/non-telencephalic neurons	1060	0.519811	GSM7232100
3278	B3	GSE230684	h1930001	CBV	cere	2			CB	CB_2	CB	3	Inhibitory/non-telencephalic neurons	1017	0.620452	GSM7232103
3279	B3	GSE230684	h1930001	CBV	cere	2			CB	CB_2	CB	3	Inhibitory/non-telencephalic neurons	986	0.605984	GSM7232104
3280	B3	GSE230684	h1930001	CBV	cere	2			CB	CB_0	CB	3	Inhibitory/non-telencephalic neurons	875	0.561143	GSM7232126
3282	B3	GSE230684	h1930001	CBV	cere	2			CB	CB_1	CB	3	Inhibitory/non-telencephalic neurons	916	0.558952	GSM7232130
3286	B3	GSE230684	h1930001	CBV	cere	2			CB	CB_1	CB	3	Inhibitory/non-telencephalic neurons	1883	0.538458	GSM7232148
3288	B3	GSE230684	h1930001	CBV	cere	2			CB	CB_0	CB	3	Inhibitory/non-telencephalic neurons	882	0.60034	GSM7232158
3289	B3	GSE230684	h1930001	CBV	cere	2			CB	CB_1	CB	3	Inhibitory/non-telencephalic neurons	1290	0.582946	GSM7232163
3290	B3	GSE230684	h1930001	CBV	cere	2			CB	CB_1	CB	3	Inhibitory/non-telencephalic neurons	1212	0.518839	GSM7232181
3291	B3	GSE230684	h1930001	CBV	cere	2			CB	CB_0	CB	3	Inhibitory/non-telencephalic neurons	1206	0.567993	GSM7232182
3293	B3	GSE230684	h1930001	CBV	cere	2			CB	CB_1	CB	3	Inhibitory/non-telencephalic neurons	848	0.524371	GSM7232251
3295	B3	GSE230684	h1930001	CBV	cere	2			CB	CB_0	CB	3	Inhibitory/non-telencephalic neurons	1078	0.586039	GSM7232272
3296	B3	GSE230684	h1930001	CBV	cere	2			CB	CB_1	CB	3	Inhibitory/non-telencephalic neurons	943	0.586426	GSM7232279
3298	B3	GSE230684	h1930001	CBV	cere	2			CB	CB_1	CB	3	Inhibitory/non-telencephalic neurons	944	0.566737	GSM7232282
3299	B3	GSE230684	h1930001	CBV	cere	2			CB	CB_1	CB	3	Inhibitory/non-telencephalic neurons	943	0.563097	GSM7232283
3300	B3	GSE230684	h1930001	CBV	cere	2			CB	CB_0	CB	3	Inhibitory/non-telencephalic neurons	1051	0.55471	GSM7232285
3301	B3	GSE230684	h1930001	CBV	cere	2			CB	CB_1	CB	3	Inhibitory/non-telencephalic neurons	988	0.538462	GSM7232289
3302	B3	GSE230684	h1930001	CBV	cere	2			CB	CB_0	CB	3	Inhibitory/non-telencephalic neurons	1090	0.566972	GSM7232291
3303	B3	GSE230684	h1930001	CBV	cere	2			CB	CB_0	CB	3	Inhibitory/non-telencephalic neurons	867	0.594002	GSM7232296
3304	B3	GSE230684	h1930001	CBV	cere	2			CB	CB_1	CB	3	Inhibitory/non-telencephalic neurons	961	0.574402	GSM7232299
3306	B3	GSE230684	h1930001	CBV	cere	2			CB	CB_2	CB	3	Inhibitory/non-telencephalic neurons	1025	0.623415	GSM7232306
3307	B3	GSE230684	h1930001	CBV	cere	2			CB	CB_0	CB	3	Inhibitory/non-telencephalic neurons	1010	0.524752	GSM7232307
3309	B3	GSE230684	h1930001	CBV	cere	2			CB	CB_1	CB	3	Inhibitory/non-telencephalic neurons	988	0.534413	GSM7232311
3311	B3	GSE230684	h1930001	CBV	cere	2			CB	CB_1	CB	3	Inhibitory/non-telencephalic neurons	810	0.52963	GSM7232324
3312	B3	GSE230684	h1930001	CBV	cere	2			CB	CB_1	CB	3	Inhibitory/non-telencephalic neurons	895	0.543017	GSM7232328
3315	B3	GSE230684	h1930001	CBV	cere	2			CB	CB_0	CB	3	Inhibitory/non-telencephalic neurons	887	0.606539	GSM7232337
3317	B3	GSE230684	h1930001	CBV	cere	2			CB	CB_1	CB	3	Inhibitory/non-telencephalic neurons	1678	0.574493	GSM7232340
3318	B3	GSE230684	h1930001	CBV	cere	2			CB	CB_1	CB	3	Inhibitory/non-telencephalic neurons	821	0.556638	GSM7232343
3319	B3	GSE230684	h1930001	CBV	cere	2			CB	CB_2	CB	3	Inhibitory/non-telencephalic neurons	1737	0.569948	GSM7232356
3320	B3	GSE230684	h1930001	CBV	cere	2			CB	CB_1	CB	3	Inhibitory/non-telencephalic neurons	1512	0.542879	GSM7232357
3321	B3	GSE230684	h1930001	CBV	cere	2			CB	CB_1	CB	3	Inhibitory/non-telencephalic neurons	845	0.535503	GSM7232360
3322	B3	GSE230684	h1930001	CBV	cere	2			CB	CB_1	CB	3	Inhibitory/non-telencephalic neurons	811	0.547472	GSM7232362
3323	B3	GSE230684	h1930001	CBV	cere	2			CB	CB_0	CB	3	Inhibitory/non-telencephalic neurons	858	0.543124	GSM7232363
3324	B3	GSE230684	h1930001	CBV	cere	2			CB	CB_0	CB	3	Inhibitory/non-telencephalic neurons	971	0.535015	GSM7232370
3327	B3	GSE230684	h1930001	CBV	cere	2			CB	CB_2	CB	3	Inhibitory/non-telencephalic neurons	928	0.607759	GSM7232390
3329	B3	GSE230684	h1930001	CBV	cere	2			CB	CB_1	CB	3	Inhibitory/non-telencephalic neurons	827	0.586457	GSM7232397
3330	B3	GSE230684	h1930001	CBV	cere	2			CB	CB_1	CB	3	Inhibitory/non-telencephalic neurons	845	0.495858	GSM7232401
3331	B3	GSE230684	h1930001	CBV	cere	2			CB	CB_0	CB	3	Inhibitory/non-telencephalic neurons	892	0.501121	GSM7232405
3333	B3	GSE230684	h1930001	CBV	cere	2			CB	CB_0	CB	3	Inhibitory/non-telencephalic neurons	1025	0.52878	GSM7232414
3334	B3	GSE230684	h1930001	CBV	cere	2			CB	CB_1	CB	3	Inhibitory/non-telencephalic neurons	1511	0.549084	GSM7232415
3335	B3	GSE230684	h1930001	CBV	cere	2			CB	CB_1	CB	3	Inhibitory/non-telencephalic neurons	840	0.477381	GSM7232421
3336	B3	GSE230684	h1930001	CBV	cere	2			CB	CB_0	CB	3	Inhibitory/non-telencephalic neurons	881	0.557321	GSM7232427
3337	B3	GSE230684	h1930001	CBV	cere	2			CB	CB_1	CB	3	Inhibitory/non-telencephalic neurons	888	0.56982	GSM7232428
3338	B3	GSE230684	h1930001	CBV	cere	2			CB	CB_1	CB	3	Inhibitory/non-telencephalic neurons	890	0.537079	GSM7232432
3340	B3	GSE230684	h1930001	CBV	cere	2			CB	CB_0	CB	3	Inhibitory/non-telencephalic neurons	811	0.55857	GSM7232438
3341	B3	GSE230684	h1930001	CBV	cere	2			CB	CB_2	CB	3	Inhibitory/non-telencephalic neurons	946	0.618393	GSM7232440
3343	B3	GSE230684	h1930001	CBV	cere	2			CB	CB_0	CB	3	Inhibitory/non-telencephalic neurons	1467	0.552147	GSM7232448
3344	B3	GSE230684	h1930001	CBV	cere	2			CB	CB_1	CB	3	Inhibitory/non-telencephalic neurons	925	0.490811	GSM7232456
[truncated: 19,837 more rows]

## Sheet: H02_cells
ID	array	GSE	Donor	Region	MR	MR#	cortex	cortex#	MajorType	SubType	MT	MT#	CellClass	fCpGcounts	aveMe	GSM
1	A1	GSE179610	h1930002	A5-A7	cortex	6	PC	2	Pvalb	Pvalb_2	Pvalb	13	Inhibitory/non-telencephalic neurons	1388	0.691643	GSM5421537
2	A1	GSE179610	h1930002	A5-A7	cortex	6	PC	2	Sst	Sst_0	Sst	12	Inhibitory/non-telencephalic neurons	1274	0.699372	GSM5421548
3	A1	GSE179610	h1930002	A5-A7	cortex	6	PC	2	Vip	Vip_8	Vip	11	Inhibitory/non-telencephalic neurons	1446	0.694675	GSM5421574
4	A1	GSE179610	h1930002	A5-A7	cortex	6	PC	2	Vip	Vip_4	Vip	11	Inhibitory/non-telencephalic neurons	1373	0.663753	GSM5421616
5	A1	GSE179610	h1930002	A5-A7	cortex	6	PC	2	Vip	Vip_8	Vip	11	Inhibitory/non-telencephalic neurons	1281	0.679157	GSM5421643
6	A1	GSE179610	h1930002	A5-A7	cortex	6	PC	2	Vip	Vip_2	Vip	11	Inhibitory/non-telencephalic neurons	1318	0.653263	GSM5421660
7	A1	GSE179610	h1930002	A5-A7	cortex	6	PC	2	Sst	Sst_3	Sst	12	Inhibitory/non-telencephalic neurons	1452	0.659435	GSM5421664
8	A1	GSE179610	h1930002	A5-A7	cortex	6	PC	2	Vip	Vip_7	Vip	11	Inhibitory/non-telencephalic neurons	1555	0.627653	GSM5421668
9	A1	GSE179610	h1930002	A5-A7	cortex	6	PC	2	Pvalb	Pvalb_0	Pvalb	13	Inhibitory/non-telencephalic neurons	1246	0.715088	GSM5421669
10	A1	GSE179610	h1930002	A5-A7	cortex	6	PC	2	Pvalb-ChC	Pvalb_ChC_1	Pvalb	13	Inhibitory/non-telencephalic neurons	1492	0.707775	GSM5421671
11	A1	GSE179610	h1930002	A5-A7	cortex	6	PC	2	Sst	Sst_0	Sst	12	Inhibitory/non-telencephalic neurons	1191	0.72712	GSM5421675
12	A1	GSE179610	h1930002	A5-A7	cortex	6	PC	2	Pvalb-ChC	Pvalb_ChC_0	Pvalb	13	Inhibitory/non-telencephalic neurons	1432	0.668762	GSM5421692
13	A1	GSE179610	h1930002	A5-A7	cortex	6	PC	2	Sncg	Sncg_3	Sncg	10	Inhibitory/non-telencephalic neurons	1558	0.572208	GSM5421703
14	A1	GSE179610	h1930002	A5-A7	cortex	6	PC	2	Vip	Vip_7	Vip	11	Inhibitory/non-telencephalic neurons	1205	0.673859	GSM5421705
15	A1	GSE179610	h1930002	A5-A7	cortex	6	PC	2	Lamp5	Lamp5_0	Lamp5	9	Inhibitory/non-telencephalic neurons	1455	0.701718	GSM5421708
16	A1	GSE179610	h1930002	A5-A7	cortex	6	PC	2	Vip	Vip_8	Vip	11	Inhibitory/non-telencephalic neurons	1315	0.713308	GSM5421722
17	A1	GSE179610	h1930002	A5-A7	cortex	6	PC	2	Vip	Vip_5	Vip	11	Inhibitory/non-telencephalic neurons	1321	0.724451	GSM5421727
18	A1	GSE179610	h1930002	A5-A7	cortex	6	PC	2	Vip	Vip_8	Vip	11	Inhibitory/non-telencephalic neurons	1364	0.671554	GSM5421735
19	A1	GSE179610	h1930002	A5-A7	cortex	6	PC	2	Pvalb	Pvalb_3	Pvalb	13	Inhibitory/non-telencephalic neurons	1317	0.735004	GSM5421736
20	A1	GSE179610	h1930002	A5-A7	cortex	6	PC	2	Pvalb	Pvalb_0	Pvalb	13	Inhibitory/non-telencephalic neurons	1248	0.747196	GSM5421751
21	A1	GSE179610	h1930002	A5-A7	cortex	6	PC	2	Pvalb	Pvalb_1	Pvalb	13	Inhibitory/non-telencephalic neurons	1336	0.648578	GSM5421759
22	A1	GSE179610	h1930002	A5-A7	cortex	6	PC	2	Pvalb	Pvalb_1	Pvalb	13	Inhibitory/non-telencephalic neurons	1303	0.746738	GSM5421768
23	A1	GSE179610	h1930002	A5-A7	cortex	6	PC	2	Sst	Sst_3	Sst	12	Inhibitory/non-telencephalic neurons	1418	0.595205	GSM5421777
24	A1	GSE179610	h1930002	A5-A7	cortex	6	PC	2	Sst	Sst_0	Sst	12	Inhibitory/non-telencephalic neurons	1475	0.71322	GSM5421796
25	A1	GSE179610	h1930002	A5-A7	cortex	6	PC	2	Pvalb	Pvalb_2	Pvalb	13	Inhibitory/non-telencephalic neurons	1333	0.699925	GSM5421797
26	A1	GSE179610	h1930002	A5-A7	cortex	6	PC	2	Sst	Sst_0	Sst	12	Inhibitory/non-telencephalic neurons	1410	0.699291	GSM5421815
27	A1	GSE179610	h1930002	A5-A7	cortex	6	PC	2	Pvalb	Pvalb_5	Pvalb	13	Inhibitory/non-telencephalic neurons	1241	0.746172	GSM5421818
28	A1	GSE179610	h1930002	A5-A7	cortex	6	PC	2	Vip	Vip_3	Vip	11	Inhibitory/non-telencephalic neurons	1288	0.725155	GSM5421820
29	A1	GSE179610	h1930002	A5-A7	cortex	6	PC	2	Sst	Sst_1	Sst	12	Inhibitory/non-telencephalic neurons	1580	0.77057	GSM5421832
30	A1	GSE179610	h1930002	A5-A7	cortex	6	PC	2	Sst	Sst_4	Sst	12	Inhibitory/non-telencephalic neurons	1281	0.700625	GSM5421834
31	A1	GSE179610	h1930002	A5-A7	cortex	6	PC	2	Vip	Vip_5	Vip	11	Inhibitory/non-telencephalic neurons	1277	0.669538	GSM5421864
32	A1	GSE179610	h1930002	A5-A7	cortex	6	PC	2	Vip	Vip_2	Vip	11	Inhibitory/non-telencephalic neurons	1419	0.766385	GSM5421874
33	A1	GSE179610	h1930002	A5-A7	cortex	6	PC	2	Sst	Sst_3	Sst	12	Inhibitory/non-telencephalic neurons	1161	0.619294	GSM5421876
34	A1	GSE179610	h1930002	A5-A7	cortex	6	PC	2	Sst	Sst_1	Sst	12	Inhibitory/non-telencephalic neurons	1676	0.719272	GSM5421885
35	A1	GSE179610	h1930002	A5-A7	cortex	6	PC	2	Pvalb	Pvalb_1	Pvalb	13	Inhibitory/non-telencephalic neurons	1758	0.642207	GSM5421888
36	A1	GSE179610	h1930002	A5-A7	cortex	6	PC	2	Pvalb	Pvalb_2	Pvalb	13	Inhibitory/non-telencephalic neurons	1339	0.699029	GSM5421889
37	A1	GSE179610	h1930002	A5-A7	cortex	6	PC	2	Lamp5-Lhx6	Lamp5_LHX6_0	Lamp5	9	Inhibitory/non-telencephalic neurons	1285	0.643969	GSM5421901
38	A1	GSE179610	h1930002	A5-A7	cortex	6	PC	2	Pvalb	Pvalb_0	Pvalb	13	Inhibitory/non-telencephalic neurons	1253	0.666401	GSM5421902
39	A1	GSE179610	h1930002	A5-A7	cortex	6	PC	2	Lamp5	Lamp5_3	Lamp5	9	Inhibitory/non-telencephalic neurons	1171	0.603757	GSM5421911
40	A1	GSE179610	h1930002	A5-A7	cortex	6	PC	2	Pvalb	Pvalb_0	Pvalb	13	Inhibitory/non-telencephalic neurons	1991	0.72451	GSM5421925
41	A1	GSE179610	h1930002	A5-A7	cortex	6	PC	2	Sst	Sst_2	Sst	12	Inhibitory/non-telencephalic neurons	1829	0.674686	GSM5421926
42	A1	GSE179610	h1930002	A5-A7	cortex	6	PC	2	Sst	Sst_3	Sst	12	Inhibitory/non-telencephalic neurons	1222	0.581833	GSM5421932
43	A1	GSE179610	h1930002	A5-A7	cortex	6	PC	2	Vip	Vip_2	Vip	11	Inhibitory/non-telencephalic neurons	1596	0.663847	GSM5421937
44	A1	GSE179610	h1930002	A5-A7	cortex	6	PC	2	Sst	Sst_3	Sst	12	Inhibitory/non-telencephalic neurons	1353	0.679231	GSM5421939
45	A1	GSE179610	h1930002	A5-A7	cortex	6	PC	2	Pvalb	Pvalb_1	Pvalb	13	Inhibitory/non-telencephalic neurons	1335	0.682397	GSM5421950
46	A1	GSE179610	h1930002	A5-A7	cortex	6	PC	2	Sst	Sst_3	Sst	12	Inhibitory/non-telencephalic neurons	1301	0.649885	GSM5421952
47	A1	GSE179610	h1930002	A5-A7	cortex	6	PC	2	Sst	Sst_6	Sst	12	Inhibitory/non-telencephalic neurons	1218	0.71757	GSM5421953
48	A1	GSE179610	h1930002	A5-A7	cortex	6	PC	2	Sncg	Sncg_2	Sncg	10	Inhibitory/non-telencephalic neurons	1375	0.748364	GSM5421986
49	A1	GSE179610	h1930002	A5-A7	cortex	6	PC	2	Pvalb	Pvalb_2	Pvalb	13	Inhibitory/non-telencephalic neurons	1418	0.735896	GSM5421994
50	A1	GSE179610	h1930002	A5-A7	cortex	6	PC	2	Sst	Sst_3	Sst	12	Inhibitory/non-telencephalic neurons	1349	0.684211	GSM5422016
51	A1	GSE179610	h1930002	A5-A7	cortex	6	PC	2	Sst	Sst_5	Sst	12	Inhibitory/non-telencephalic neurons	1303	0.610898	GSM5422023
52	A1	GSE179610	h1930002	A5-A7	cortex	6	PC	2	Pvalb	Pvalb_0	Pvalb	13	Inhibitory/non-telencephalic neurons	1358	0.687776	GSM5422031
53	A1	GSE179610	h1930002	A5-A7	cortex	6	PC	2	Vip	Vip_2	Vip	11	Inhibitory/non-telencephalic neurons	1753	0.613805	GSM5422033
54	A1	GSE179610	h1930002	A5-A7	cortex	6	PC	2	Pvalb	Pvalb_0	Pvalb	13	Inhibitory/non-telencephalic neurons	1279	0.699218	GSM5422040
55	A1	GSE179610	h1930002	A5-A7	cortex	6	PC	2	Pvalb	Pvalb_0	Pvalb	13	Inhibitory/non-telencephalic neurons	1191	0.717045	GSM5422045
56	A1	GSE179610	h1930002	A5-A7	cortex	6	PC	2	Lamp5	Lamp5_0	Lamp5	9	Inhibitory/non-telencephalic neurons	1327	0.66315	GSM5422049
57	A1	GSE179610	h1930002	A5-A7	cortex	6	PC	2	Lamp5	Lamp5_0	Lamp5	9	Inhibitory/non-telencephalic neurons	1788	0.635906	GSM5422051
58	A1	GSE179610	h1930002	A5-A7	cortex	6	PC	2	Sst	Sst_6	Sst	12	Inhibitory/non-telencephalic neurons	1914	0.70829	GSM5422071
59	A1	GSE179610	h1930002	A5-A7	cortex	6	PC	2	Pvalb-ChC	Pvalb_ChC_0	Pvalb	13	Inhibitory/non-telencephalic neurons	1520	0.648684	GSM5422072
60	A1	GSE179610	h1930002	A5-A7	cortex	6	PC	2	Pvalb	Pvalb_2	Pvalb	13	Inhibitory/non-telencephalic neurons	1625	0.646154	GSM5422073
61	A1	GSE179610	h1930002	A5-A7	cortex	6	PC	2	Vip	Vip_3	Vip	11	Inhibitory/non-telencephalic neurons	1121	0.688225	GSM5422075
62	A1	GSE179610	h1930002	A5-A7	cortex	6	PC	2	Vip	Vip_2	Vip	11	Inhibitory/non-telencephalic neurons	1677	0.658915	GSM5422079
63	A1	GSE179610	h1930002	A5-A7	cortex	6	PC	2	Vip	Vip_4	Vip	11	Inhibitory/non-telencephalic neurons	1314	0.721461	GSM5422080
64	A1	GSE179610	h1930002	A5-A7	cortex	6	PC	2	Sst	Sst_0	Sst	12	Inhibitory/non-telencephalic neurons	1657	0.682257	GSM5422086
65	A1	GSE179610	h1930002	A5-A7	cortex	6	PC	2	Pvalb	Pvalb_1	Pvalb	13	Inhibitory/non-telencephalic neurons	1654	0.600363	GSM5422090
66	A1	GSE179610	h1930002	A5-A7	cortex	6	PC	2	Pvalb	Pvalb_0	Pvalb	13	Inhibitory/non-telencephalic neurons	1181	0.681626	GSM5422093
67	A1	GSE179610	h1930002	A5-A7	cortex	6	PC	2	Sncg	Sncg_2	Sncg	10	Inhibitory/non-telencephalic neurons	1345	0.642379	GSM5422096
68	A1	GSE179610	h1930002	A5-A7	cortex	6	PC	2	Pvalb	Pvalb_3	Pvalb	13	Inhibitory/non-telencephalic neurons	1206	0.742952	GSM5422108
69	A1	GSE179610	h1930002	A5-A7	cortex	6	PC	2	Pvalb-ChC	Pvalb_ChC_0	Pvalb	13	Inhibitory/non-telencephalic neurons	1409	0.700497	GSM5422111
70	A1	GSE179610	h1930002	A5-A7	cortex	6	PC	2	Sst	Sst_3	Sst	12	Inhibitory/non-telencephalic neurons	1361	0.681117	GSM5422112
71	A1	GSE179610	h1930002	A5-A7	cortex	6	PC	2	Pvalb	Pvalb_2	Pvalb	13	Inhibitory/non-telencephalic neurons	1634	0.715422	GSM5422113
72	A1	GSE179610	h1930002	A5-A7	cortex	6	PC	2	Sst	Sst_1	Sst	12	Inhibitory/non-telencephalic neurons	1683	0.808081	GSM5422114
73	A1	GSE179610	h1930002	A5-A7	cortex	6	PC	2	Pvalb	Pvalb_0	Pvalb	13	Inhibitory/non-telencephalic neurons	1476	0.667796	GSM5422115
74	A1	GSE179610	h1930002	A5-A7	cortex	6	PC	2	Pvalb	Pvalb_0	Pvalb	13	Inhibitory/non-telencephalic neurons	1887	0.665607	GSM5422116
75	A1	GSE179610	h1930002	A5-A7	cortex	6	PC	2	Lamp5	Lamp5_0	Lamp5	9	Inhibitory/non-telencephalic neurons	1676	0.59278	GSM5422117
76	A1	GSE179610	h1930002	A5-A7	cortex	6	PC	2	Vip	Vip_0	Vip	11	Inhibitory/non-telencephalic neurons	1270	0.632283	GSM5422118
77	A1	GSE179610	h1930002	A5-A7	cortex	6	PC	2	Vip	Vip_7	Vip	11	Inhibitory/non-telencephalic neurons	1432	0.651536	GSM5422122
78	A1	GSE179610	h1930002	A5-A7	cortex	6	PC	2	Sst	Sst_0	Sst	12	Inhibitory/non-telencephalic neurons	1310	0.70458	GSM5422124
79	A1	GSE179610	h1930002	A5-A7	cortex	6	PC	2	Pvalb	Pvalb_2	Pvalb	13	Inhibitory/non-telencephalic neurons	1470	0.686395	GSM5422126
80	A1	GSE179610	h1930002	A5-A7	cortex	6	PC	2	Lamp5-Lhx6	Lamp5_LHX6_0	Lamp5	9	Inhibitory/non-telencephalic neurons	1388	0.650576	GSM5422127
81	A1	GSE179610	h1930002	A5-A7	cortex	6	PC	2	Vip	Vip_2	Vip	11	Inhibitory/non-telencephalic neurons	1292	0.65209	GSM5422132
82	A1	GSE179610	h1930002	A5-A7	cortex	6	PC	2	Vip	Vip_6	Vip	11	Inhibitory/non-telencephalic neurons	1217	0.73788	GSM5422133
83	A1	GSE179610	h1930002	A5-A7	cortex	6	PC	2	Pvalb	Pvalb_0	Pvalb	13	Inhibitory/non-telencephalic neurons	1530	0.671895	GSM5422138
84	A1	GSE179610	h1930002	A5-A7	cortex	6	PC	2	Sst	Sst_1	Sst	12	Inhibitory/non-telencephalic neurons	1420	0.726291	GSM5422142
85	A1	GSE179610	h1930002	A5-A7	cortex	6	PC	2	Sst	Sst_4	Sst	12	Inhibitory/non-telencephalic neurons	1275	0.701961	GSM5422143
86	A1	GSE179610	h1930002	A5-A7	cortex	6	PC	2	Lamp5	Lamp5_0	Lamp5	9	Inhibitory/non-telencephalic neurons	1192	0.608725	GSM5422146
87	A1	GSE179610	h1930002	A5-A7	cortex	6	PC	2	Pvalb-ChC	Pvalb_ChC_0	Pvalb	13	Inhibitory/non-telencephalic neurons	1732	0.676674	GSM5422147
88	A1	GSE179610	h1930002	A5-A7	cortex	6	PC	2	Pvalb	Pvalb_1	Pvalb	13	Inhibitory/non-telencephalic neurons	1604	0.703554	GSM5422150
89	A1	GSE179610	h1930002	A5-A7	cortex	6	PC	2	Pvalb	Pvalb_2	Pvalb	13	Inhibitory/non-telencephalic neurons	1229	0.643613	GSM5422151
90	A1	GSE179610	h1930002	A5-A7	cortex	6	PC	2	Pvalb-ChC	Pvalb_ChC_0	Pvalb	13	Inhibitory/non-telencephalic neurons	1331	0.68595	GSM5422156
91	A1	GSE179610	h1930002	A5-A7	cortex	6	PC	2	Sst	Sst_4	Sst	12	Inhibitory/non-telencephalic neurons	1444	0.789474	GSM5422159
92	A1	GSE179610	h1930002	A5-A7	cortex	6	PC	2	Pvalb	Pvalb_2	Pvalb	13	Inhibitory/non-telencephalic neurons	1674	0.673835	GSM5422162
93	A1	GSE179610	h1930002	A5-A7	cortex	6	PC	2	Sst	Sst_2	Sst	12	Inhibitory/non-telencephalic neurons	1480	0.635811	GSM5422173
94	A1	GSE179610	h1930002	A5-A7	cortex	6	PC	2	Pvalb	Pvalb_4	Pvalb	13	Inhibitory/non-telencephalic neurons	1746	0.77205	GSM5422174
95	A1	GSE179610	h1930002	A5-A7	cortex	6	PC	2	Pvalb	Pvalb_0	Pvalb	13	Inhibitory/non-telencephalic neurons	1522	0.699737	GSM5422186
96	A1	GSE179610	h1930002	A5-A7	cortex	6	PC	2	Sst	Sst_3	Sst	12	Inhibitory/non-telencephalic neurons	1538	0.658648	GSM5422197
97	A1	GSE179610	h1930002	A5-A7	cortex	6	PC	2	Vip	Vip_2	Vip	11	Inhibitory/non-telencephalic neurons	1778	0.66198	GSM5422198
98	A1	GSE179610	h1930002	A5-A7	cortex	6	PC	2	Pvalb	Pvalb_1	Pvalb	13	Inhibitory/non-telencephalic neurons	1482	0.648785	GSM5422201
99	A1	GSE179610	h1930002	A5-A7	cortex	6	PC	2	Pvalb	Pvalb_2	Pvalb	13	Inhibitory/non-telencephalic neurons	1578	0.731939	GSM5422218
100	A1	GSE179610	h1930002	A5-A7	cortex	6	PC	2	Lamp5-Lhx6	Lamp5_LHX6_0	Lamp5	9	Inhibitory/non-telencephalic neurons	1707	0.630931	GSM5422231
101	A1	GSE179610	h1930002	A5-A7	cortex	6	PC	2	Sst	Sst_4	Sst	12	Inhibitory/non-telencephalic neurons	1392	0.701868	GSM5422242
102	A1	GSE179610	h1930002	A5-A7	cortex	6	PC	2	Vip	Vip_8	Vip	11	Inhibitory/non-telencephalic neurons	1452	0.649793	GSM5422248
103	A1	GSE179610	h1930002	A5-A7	cortex	6	PC	2	Pvalb-ChC	Pvalb_ChC_0	Pvalb	13	Inhibitory/non-telencephalic neurons	1373	0.687546	GSM5422249
104	A1	GSE179610	h1930002	A5-A7	cortex	6	PC	2	Sst	Sst_1	Sst	12	Inhibitory/non-telencephalic neurons	1275	0.721569	GSM5422255
105	A1	GSE179610	h1930002	A5-A7	cortex	6	PC	2	Pvalb	Pvalb_1	Pvalb	13	Inhibitory/non-telencephalic neurons	1389	0.732181	GSM5422260
106	A1	GSE179610	h1930002	A5-A7	cortex	6	PC	2	Sst	Sst_1	Sst	12	Inhibitory/non-telencephalic neurons	1490	0.792953	GSM5422264
107	A1	GSE179610	h1930002	A5-A7	cortex	6	PC	2	Lamp5	Lamp5_1	Lamp5	9	Inhibitory/non-telencephalic neurons	1587	0.60586	GSM5422265
108	A1	GSE179610	h1930002	A5-A7	cortex	6	PC	2	Pvalb	Pvalb_2	Pvalb	13	Inhibitory/non-telencephalic neurons	1903	0.70783	GSM5422271
109	A1	GSE179610	h1930002	A5-A7	cortex	6	PC	2	Sst	Sst_3	Sst	12	Inhibitory/non-telencephalic neurons	1873	0.681794	GSM5422272
110	A1	GSE179610	h1930002	A5-A7	cortex	6	PC	2	Pvalb	Pvalb_0	Pvalb	13	Inhibitory/non-telencephalic neurons	1617	0.667285	GSM5422274
111	A1	GSE179610	h1930002	A5-A7	cortex	6	PC	2	Sst	Sst_0	Sst	12	Inhibitory/non-telencephalic neurons	1326	0.6546	GSM5422278
112	A1	GSE179610	h1930002	A5-A7	cortex	6	PC	2	Pvalb	Pvalb_4	Pvalb	13	Inhibitory/non-telencephalic neurons	1654	0.733071	GSM5422279
113	A1	GSE179610	h1930002	A5-A7	cortex	6	PC	2	Lamp5	Lamp5_2	Lamp5	9	Inhibitory/non-telencephalic neurons	1777	0.682611	GSM5422280
114	A1	GSE179610	h1930002	A5-A7	cortex	6	PC	2	Sst	Sst_1	Sst	12	Inhibitory/non-telencephalic neurons	1538	0.761378	GSM5422281
115	A1	GSE179610	h1930002	A5-A7	cortex	6	PC	2	Lamp5-Lhx6	Lamp5_LHX6_0	Lamp5	9	Inhibitory/non-telencephalic neurons	1337	0.675393	GSM5422282
116	A1	GSE179610	h1930002	A5-A7	cortex	6	PC	2	Sncg	Sncg_0	Sncg	10	Inhibitory/non-telencephalic neurons	1272	0.683962	GSM5422286
117	A1	GSE179610	h1930002	A5-A7	cortex	6	PC	2	Pvalb	Pvalb_2	Pvalb	13	Inhibitory/non-telencephalic neurons	1641	0.708105	GSM5422288
118	A1	GSE179610	h1930002	A5-A7	cortex	6	PC	2	Vip	Vip_2	Vip	11	Inhibitory/non-telencephalic neurons	1806	0.621539	GSM5422292
119	A1	GSE179610	h1930002	A5-A7	cortex	6	PC	2	Lamp5-Lhx6	Lamp5_LHX6_0	Lamp5	9	Inhibitory/non-telencephalic neurons	2092	0.660134	GSM5422293
120	A1	GSE179610	h1930002	A5-A7	cortex	6	PC	2	Lamp5	Lamp5_3	Lamp5	9	Inhibitory/non-telencephalic neurons	1644	0.627737	GSM5422298
121	A1	GSE179610	h1930002	A5-A7	cortex	6	PC	2	Sncg	Sncg_0	Sncg	10	Inhibitory/non-telencephalic neurons	1785	0.620728	GSM5422302
122	A1	GSE179610	h1930002	A5-A7	cortex	6	PC	2	Pvalb	Pvalb_0	Pvalb	13	Inhibitory/non-telencephalic neurons	1507	0.706702	GSM5422304
123	A1	GSE179610	h1930002	A5-A7	cortex	6	PC	2	Vip	Vip_2	Vip	11	Inhibitory/non-telencephalic neurons	1205	0.648133	GSM5422314
124	A1	GSE179610	h1930002	A5-A7	cortex	6	PC	2	Pvalb	Pvalb_0	Pvalb	13	Inhibitory/non-telencephalic neurons	2038	0.664622	GSM5422328
125	A1	GSE179610	h1930002	A5-A7	cortex	6	PC	2	Pvalb	Pvalb_0	Pvalb	13	Inhibitory/non-telencephalic neurons	2015	0.658561	GSM5422333
126	A1	GSE179610	h1930002	A5-A7	cortex	6	PC	2	Vip	Vip_3	Vip	11	Inhibitory/non-telencephalic neurons	1464	0.659495	GSM5422334
127	A1	GSE179610	h1930002	A5-A7	cortex	6	PC	2	Sst	Sst-Chodl	Sst	12	Inhibitory/non-telencephalic neurons	1493	0.668931	GSM5422338
128	A1	GSE179610	h1930002	A5-A7	cortex	6	PC	2	Pvalb	Pvalb_1	Pvalb	13	Inhibitory/non-telencephalic neurons	1756	0.709852	GSM5422342
129	A1	GSE179610	h1930002	A5-A7	cortex	6	PC	2	Vip	Vip_2	Vip	11	Inhibitory/non-telencephalic neurons	1057	0.665405	GSM5422352
130	A1	GSE179610	h1930002	A5-A7	cortex	6	PC	2	Pvalb	Pvalb_0	Pvalb	13	Inhibitory/non-telencephalic neurons	1357	0.712085	GSM5422359
131	A1	GSE179610	h1930002	A5-A7	cortex	6	PC	2	Sst	Sst_1	Sst	12	Inhibitory/non-telencephalic neurons	1538	0.811443	GSM5422360
132	A1	GSE179610	h1930002	A5-A7	cortex	6	PC	2	Lamp5	Lamp5_0	Lamp5	9	Inhibitory/non-telencephalic neurons	2079	0.631233	GSM5422362
133	A1	GSE179610	h1930002	A5-A7	cortex	6	PC	2	Lamp5	Lamp5_1	Lamp5	9	Inhibitory/non-telencephalic neurons	2121	0.59901	GSM5422381
134	A1	GSE179610	h1930002	A5-A7	cortex	6	PC	2	Sst	Sst_4	Sst	12	Inhibitory/non-telencephalic neurons	2785	0.662059	GSM5422382
135	A1	GSE179610	h1930002	A5-A7	cortex	6	PC	2	Pvalb	Pvalb_5	Pvalb	13	Inhibitory/non-telencephalic neurons	1453	0.734343	GSM5422385
136	A1	GSE179610	h1930002	A5-A7	cortex	6	PC	2	Pvalb	Pvalb_1	Pvalb	13	Inhibitory/non-telencephalic neurons	2097	0.732952	GSM5422386
137	A1	GSE179610	h1930002	A5-A7	cortex	6	PC	2	Sst	Sst_3	Sst	12	Inhibitory/non-telencephalic neurons	1523	0.628081	GSM5422393
138	A1	GSE179610	h1930002	A5-A7	cortex	6	PC	2	Sst	Sst_3	Sst	12	Inhibitory/non-telencephalic neurons	1565	0.640682	GSM5422396
139	A1	GSE179610	h1930002	A5-A7	cortex	6	PC	2	Lamp5-Lhx6	Lamp5_LHX6_0	Lamp5	9	Inhibitory/non-telencephalic neurons	2164	0.618299	GSM5422397
140	A1	GSE179610	h1930002	A5-A7	cortex	6	PC	2	Vip	Vip_0	Vip	11	Inhibitory/non-telencephalic neurons	1856	0.661638	GSM5422401
141	A1	GSE179610	h1930002	A5-A7	cortex	6	PC	2	Sst	Sst_5	Sst	12	Inhibitory/non-telencephalic neurons	1677	0.690221	GSM5422404
142	A1	GSE179610	h1930002	A5-A7	cortex	6	PC	2	Lamp5-Lhx6	Lamp5_LHX6_0	Lamp5	9	Inhibitory/non-telencephalic neurons	1241	0.699839	GSM5422406
143	A1	GSE179610	h1930002	A5-A7	cortex	6	PC	2	Pvalb	Pvalb_2	Pvalb	13	Inhibitory/non-telencephalic neurons	1534	0.694915	GSM5422408
144	A1	GSE179610	h1930002	A5-A7	cortex	6	PC	2	Pvalb	Pvalb_2	Pvalb	13	Inhibitory/non-telencephalic neurons	1534	0.715776	GSM5422414
145	A1	GSE179610	h1930002	A5-A7	cortex	6	PC	2	ASC	ASC_0	NN	20.1	Non-neuronal Cells	1191	0.606213	GSM5421539
146	A1	GSE179610	h1930002	A5-A7	cortex	6	PC	2	ODC	ODC_0	ODC	20.3	Non-neuronal Cells	1285	0.513619	GSM5421793
147	A1	GSE179610	h1930002	A5-A7	cortex	6	PC	2	OPC	OPC_0	OPC	20.2	Non-neuronal Cells	1490	0.532438	GSM5421795
148	A1	GSE179610	h1930002	A5-A7	cortex	6	PC	2	ASC	ASC_0	NN	20.1	Non-neuronal Cells	1454	0.570839	GSM5421802
149	A1	GSE179610	h1930002	A5-A7	cortex	6	PC	2	ODC	ODC_1	ODC	20.3	Non-neuronal Cells	1109	0.468891	GSM5421813
150	A1	GSE179610	h1930002	A5-A7	cortex	6	PC	2	ASC	ASC_0	NN	20.1	Non-neuronal Cells	1252	0.583866	GSM5421859
151	A1	GSE179610	h1930002	A5-A7	cortex	6	PC	2	ASC	ASC_0	NN	20.1	Non-neuronal Cells	1430	0.604895	GSM5421893
152	A1	GSE179610	h1930002	A5-A7	cortex	6	PC	2	ASC	ASC_0	NN	20.1	Non-neuronal Cells	1598	0.593867	GSM5422078
153	A1	GSE179610	h1930002	A5-A7	cortex	6	PC	2	ASC	ASC_1	NN	20.1	Non-neuronal Cells	1322	0.551437	GSM5422157
154	A1	GSE179610	h1930002	A5-A7	cortex	6	PC	2	ODC	ODC_1	ODC	20.3	Non-neuronal Cells	1869	0.555377	GSM5422223
155	A1	GSE179610	h1930002	A5-A7	cortex	6	PC	2	ASC	ASC_0	NN	20.1	Non-neuronal Cells	1919	0.597881	GSM5422378
156	A1	GSE179610	h1930002	A5-A7	cortex	6	PC	2	ASC	ASC_0	NN	20.1	Non-neuronal Cells	1679	0.597082	GSM5422403
157	A1	GSE179610	h1930002	A5-A7	cortex	6	PC	2	L5-IT	L5_IT_1	L4_6	18	Telencephalic excitatory neurons	1291	0.525949	GSM5421524
158	A1	GSE179610	h1930002	A5-A7	cortex	6	PC	2	L5/6-NP	L56_NP_0	L4_6	18	Telencephalic excitatory neurons	1537	0.709174	GSM5421528
159	A1	GSE179610	h1930002	A5-A7	cortex	6	PC	2	L5-IT	L45_IT_0	L4_6	18	Telencephalic excitatory neurons	1139	0.687738	GSM5421529
160	A1	GSE179610	h1930002	A5-A7	cortex	6	PC	2	L2/3-IT	L23_IT_4	L2/3-IT	19	Telencephalic excitatory neurons	1197	0.49457	GSM5421532
161	A1	GSE179610	h1930002	A5-A7	cortex	6	PC	2	L4-IT	L4_IT_3	L4_6	18	Telencephalic excitatory neurons	1277	0.519969	GSM5421534
162	A1	GSE179610	h1930002	A5-A7	cortex	6	PC	2	L2/3-IT	L23_IT_4	L2/3-IT	19	Telencephalic excitatory neurons	1480	0.458108	GSM5421538
163	A1	GSE179610	h1930002	A5-A7	cortex	6	PC	2	L2/3-IT	L23_IT_0	L2/3-IT	19	Telencephalic excitatory neurons	1237	0.495554	GSM5421542
164	A1	GSE179610	h1930002	A5-A7	cortex	6	PC	2	L2/3-IT	L23_IT_6	L2/3-IT	19	Telencephalic excitatory neurons	1351	0.481125	GSM5421543
165	A1	GSE179610	h1930002	A5-A7	cortex	6	PC	2	L2/3-IT	L23_IT_2	L2/3-IT	19	Telencephalic excitatory neurons	1130	0.406195	GSM5421545
166	A1	GSE179610	h1930002	A5-A7	cortex	6	PC	2	L2/3-IT	L23_IT_4	L2/3-IT	19	Telencephalic excitatory neurons	1340	0.520149	GSM5421546
167	A1	GSE179610	h1930002	A5-A7	cortex	6	PC	2	L2/3-IT	L23_IT_2	L2/3-IT	19	Telencephalic excitatory neurons	1241	0.464142	GSM5421547
168	A1	GSE179610	h1930002	A5-A7	cortex	6	PC	2	L2/3-IT	L23_IT_9	L2/3-IT	19	Telencephalic excitatory neurons	1371	0.48213	GSM5421549
169	A1	GSE179610	h1930002	A5-A7	cortex	6	PC	2	L4-IT	L4_IT_0	L4_6	18	Telencephalic excitatory neurons	1419	0.518675	GSM5421551
170	A1	GSE179610	h1930002	A5-A7	cortex	6	PC	2	L5-IT	L5_IT_3	L4_6	18	Telencephalic excitatory neurons	1133	0.563989	GSM5421559
171	A1	GSE179610	h1930002	A5-A7	cortex	6	PC	2	L4-IT	L4_IT_0	L4_6	18	Telencephalic excitatory neurons	1129	0.523915	GSM5421582
172	A1	GSE179610	h1930002	A5-A7	cortex	6	PC	2	L5-IT	L5_IT_2	L4_6	18	Telencephalic excitatory neurons	1368	0.63231	GSM5421608
173	A1	GSE179610	h1930002	A5-A7	cortex	6	PC	2	L2/3-IT	L23_IT_1	L2/3-IT	19	Telencephalic excitatory neurons	1217	0.451109	GSM5421625
174	A1	GSE179610	h1930002	A5-A7	cortex	6	PC	2	L2/3-IT	L23_IT_2	L2/3-IT	19	Telencephalic excitatory neurons	1422	0.476793	GSM5421642
175	A1	GSE179610	h1930002	A5-A7	cortex	6	PC	2	L4-IT	L4_IT_0	L4_6	18	Telencephalic excitatory neurons	1441	0.513532	GSM5421646
176	A1	GSE179610	h1930002	A5-A7	cortex	6	PC	2	L6-IT	L6_IT_2	L4_6	18	Telencephalic excitatory neurons	1153	0.511709	GSM5421647
177	A1	GSE179610	h1930002	A5-A7	cortex	6	PC	2	L6b	L6b_0	L4_6	18	Telencephalic excitatory neurons	1523	0.666448	GSM5421650
178	A1	GSE179610	h1930002	A5-A7	cortex	6	PC	2	L6-CT	L6_CT_0	L4_6	18	Telencephalic excitatory neurons	1410	0.471631	GSM5421651
179	A1	GSE179610	h1930002	A5-A7	cortex	6	PC	2	L2/3-IT	L23_IT_3	L2/3-IT	19	Telencephalic excitatory neurons	1282	0.582683	GSM5421656
180	A1	GSE179610	h1930002	A5-A7	cortex	6	PC	2	L2/3-IT	L23_IT_6	L2/3-IT	19	Telencephalic excitatory neurons	1432	0.479749	GSM5421658
181	A1	GSE179610	h1930002	A5-A7	cortex	6	PC	2	L5-IT	L5_IT_0	L4_6	18	Telencephalic excitatory neurons	1467	0.755965	GSM5421662
182	A1	GSE179610	h1930002	A5-A7	cortex	6	PC	2	L2/3-IT	L23_IT_2	L2/3-IT	19	Telencephalic excitatory neurons	1396	0.397564	GSM5421663
183	A1	GSE179610	h1930002	A5-A7	cortex	6	PC	2	L2/3-IT	L23_IT_5	L2/3-IT	19	Telencephalic excitatory neurons	1337	0.424084	GSM5421667
184	A1	GSE179610	h1930002	A5-A7	cortex	6	PC	2	L2/3-IT	L23_IT_2	L2/3-IT	19	Telencephalic excitatory neurons	1446	0.356501	GSM5421673
185	A1	GSE179610	h1930002	A5-A7	cortex	6	PC	2	L2/3-IT	L23_IT_4	L2/3-IT	19	Telencephalic excitatory neurons	1576	0.478426	GSM5421674
186	A1	GSE179610	h1930002	A5-A7	cortex	6	PC	2	L6-IT	L6_IT_2	L4_6	18	Telencephalic excitatory neurons	1189	0.576535	GSM5421676
187	A1	GSE179610	h1930002	A5-A7	cortex	6	PC	2	L6-IT	L6_IT_2	L4_6	18	Telencephalic excitatory neurons	1108	0.468863	GSM5421677
188	A1	GSE179610	h1930002	A5-A7	cortex	6	PC	2	L2/3-IT	L23_IT_6	L2/3-IT	19	Telencephalic excitatory neurons	1495	0.445485	GSM5421679
189	A1	GSE179610	h1930002	A5-A7	cortex	6	PC	2	L2/3-IT	L23_IT_0	L2/3-IT	19	Telencephalic excitatory neurons	1319	0.521607	GSM5421680
190	A1	GSE179610	h1930002	A5-A7	cortex	6	PC	2	L2/3-IT	L23_IT_6	L2/3-IT	19	Telencephalic excitatory neurons	1360	0.456618	GSM5421682
191	A1	GSE179610	h1930002	A5-A7	cortex	6	PC	2	L2/3-IT	L23_IT_1	L2/3-IT	19	Telencephalic excitatory neurons	1323	0.456538	GSM5421687
192	A1	GSE179610	h1930002	A5-A7	cortex	6	PC	2	L2/3-IT	L23_IT_0	L2/3-IT	19	Telencephalic excitatory neurons	1611	0.516449	GSM5421695
193	A1	GSE179610	h1930002	A5-A7	cortex	6	PC	2	L6b	L6b_0	L4_6	18	Telencephalic excitatory neurons	1216	0.431743	GSM5421701
194	A1	GSE179610	h1930002	A5-A7	cortex	6	PC	2	L2/3-IT	L23_IT_3	L2/3-IT	19	Telencephalic excitatory neurons	1516	0.456464	GSM5421711
195	A1	GSE179610	h1930002	A5-A7	cortex	6	PC	2	L2/3-IT	L23_IT_4	L2/3-IT	19	Telencephalic excitatory neurons	1080	0.474074	GSM5421713
196	A1	GSE179610	h1930002	A5-A7	cortex	6	PC	2	L4-IT	L4_IT_0	L4_6	18	Telencephalic excitatory neurons	1141	0.581069	GSM5421714
197	A1	GSE179610	h1930002	A5-A7	cortex	6	PC	2	L5-IT	L45_IT_0	L4_6	18	Telencephalic excitatory neurons	1158	0.697755	GSM5421716
198	A1	GSE179610	h1930002	A5-A7	cortex	6	PC	2	L5/6-NP	L56_NP_0	L4_6	18	Telencephalic excitatory neurons	1054	0.718216	GSM5421718
199	A1	GSE179610	h1930002	A5-A7	cortex	6	PC	2	L5/6-NP	L56_NP_2	L4_6	18	Telencephalic excitatory neurons	1189	0.830109	GSM5421719
200	A1	GSE179610	h1930002	A5-A7	cortex	6	PC	2	L5-IT	L5_IT_2	L4_6	18	Telencephalic excitatory neurons	1226	0.69168	GSM5421720
201	A1	GSE179610	h1930002	A5-A7	cortex	6	PC	2	L4-IT	L4_IT_0	L4_6	18	Telencephalic excitatory neurons	1406	0.586771	GSM5421729
202	A1	GSE179610	h1930002	A5-A7	cortex	6	PC	2	L6-IT	L6_IT_2	L4_6	18	Telencephalic excitatory neurons	1354	0.515263	GSM5421730
203	A1	GSE179610	h1930002	A5-A7	cortex	6	PC	2	L6b	L6b_0	L4_6	18	Telencephalic excitatory neurons	1463	0.448394	GSM5421731
204	A1	GSE179610	h1930002	A5-A7	cortex	6	PC	2	L5/6-NP	L56_NP_3	L4_6	18	Telencephalic excitatory neurons	1168	0.785103	GSM5421732
205	A1	GSE179610	h1930002	A5-A7	cortex	6	PC	2	L2/3-IT	L23_IT_1	L2/3-IT	19	Telencephalic excitatory neurons	1312	0.519436	GSM5421737
206	A1	GSE179610	h1930002	A5-A7	cortex	6	PC	2	L2/3-IT	L23_IT_5	L2/3-IT	19	Telencephalic excitatory neurons	1509	0.545394	GSM5421739
207	A1	GSE179610	h1930002	A5-A7	cortex	6	PC	2	L2/3-IT	L23_IT_7	L2/3-IT	19	Telencephalic excitatory neurons	1170	0.44359	GSM5421740
208	A1	GSE179610	h1930002	A5-A7	cortex	6	PC	2	L5-IT	L5_IT_2	L4_6	18	Telencephalic excitatory neurons	1179	0.565734	GSM5421742
209	A1	GSE179610	h1930002	A5-A7	cortex	6	PC	2	L6-CT	L6_CT_0	L4_6	18	Telencephalic excitatory neurons	1159	0.569313	GSM5421743
210	A1	GSE179610	h1930002	A5-A7	cortex	6	PC	2	L2/3-IT	L23_IT_4	L2/3-IT	19	Telencephalic excitatory neurons	1365	0.447619	GSM5421744
211	A1	GSE179610	h1930002	A5-A7	cortex	6	PC	2	L2/3-IT	L23_IT_4	L2/3-IT	19	Telencephalic excitatory neurons	1139	0.425812	GSM5421745
212	A1	GSE179610	h1930002	A5-A7	cortex	6	PC	2	L2/3-IT	L23_IT_4	L2/3-IT	19	Telencephalic excitatory neurons	1508	0.412798	GSM5421747
213	A1	GSE179610	h1930002	A5-A7	cortex	6	PC	2	L2/3-IT	L23_IT_6	L2/3-IT	19	Telencephalic excitatory neurons	1374	0.51116	GSM5421755
214	A1	GSE179610	h1930002	A5-A7	cortex	6	PC	2	L4-IT	L4_IT_0	L4_6	18	Telencephalic excitatory neurons	1455	0.56323	GSM5421756
215	A1	GSE179610	h1930002	A5-A7	cortex	6	PC	2	L2/3-IT	L23_IT_8	L2/3-IT	19	Telencephalic excitatory neurons	1391	0.631201	GSM5421773
216	A1	GSE179610	h1930002	A5-A7	cortex	6	PC	2	L6-CT	L6_CT_0	L4_6	18	Telencephalic excitatory neurons	1562	0.514725	GSM5421776
217	A1	GSE179610	h1930002	A5-A7	cortex	6	PC	2	L2/3-IT	L23_IT_8	L2/3-IT	19	Telencephalic excitatory neurons	1178	0.433786	GSM5421782
218	A1	GSE179610	h1930002	A5-A7	cortex	6	PC	2	L2/3-IT	L23_IT_4	L2/3-IT	19	Telencephalic excitatory neurons	1454	0.445667	GSM5421787
219	A1	GSE179610	h1930002	A5-A7	cortex	6	PC	2	L6-IT-Car3	L6_IT_Car3_0	L4_6	18	Telencephalic excitatory neurons	1313	0.578065	GSM5421794
220	A1	GSE179610	h1930002	A5-A7	cortex	6	PC	2	L4-IT	L4_IT_0	L4_6	18	Telencephalic excitatory neurons	1408	0.552557	GSM5421799
221	A1	GSE179610	h1930002	A5-A7	cortex	6	PC	2	L6-CT	L6_CT_0	L4_6	18	Telencephalic excitatory neurons	1593	0.53892	GSM5421800
222	A1	GSE179610	h1930002	A5-A7	cortex	6	PC	2	L6-IT	L6_IT_2	L4_6	18	Telencephalic excitatory neurons	1226	0.487765	GSM5421805
223	A1	GSE179610	h1930002	A5-A7	cortex	6	PC	2	L4-IT	L4_IT_2	L4_6	18	Telencephalic excitatory neurons	1586	0.539723	GSM5421807
224	A1	GSE179610	h1930002	A5-A7	cortex	6	PC	2	L4-IT	L4_IT_2	L4_6	18	Telencephalic excitatory neurons	1796	0.597439	GSM5421808
225	A1	GSE179610	h1930002	A5-A7	cortex	6	PC	2	L5-IT	L5_IT_2	L4_6	18	Telencephalic excitatory neurons	1374	0.670306	GSM5421810
226	A1	GSE179610	h1930002	A5-A7	cortex	6	PC	2	L6-IT-Car3	L6_IT_Car3_2	L4_6	18	Telencephalic excitatory neurons	1170	0.669231	GSM5421811
227	A1	GSE179610	h1930002	A5-A7	cortex	6	PC	2	L2/3-IT	L23_IT_6	L2/3-IT	19	Telencephalic excitatory neurons	1614	0.495147	GSM5421816
228	A1	GSE179610	h1930002	A5-A7	cortex	6	PC	2	L4-IT	L4_IT_0	L4_6	18	Telencephalic excitatory neurons	1334	0.569715	GSM5421817
229	A1	GSE179610	h1930002	A5-A7	cortex	6	PC	2	L2/3-IT	L23_IT_0	L2/3-IT	19	Telencephalic excitatory neurons	1283	0.54014	GSM5421821
230	A1	GSE179610	h1930002	A5-A7	cortex	6	PC	2	L5-IT	L5_IT_1	L4_6	18	Telencephalic excitatory neurons	1547	0.636716	GSM5421824
231	A1	GSE179610	h1930002	A5-A7	cortex	6	PC	2	L2/3-IT	L23_IT_2	L2/3-IT	19	Telencephalic excitatory neurons	1365	0.452015	GSM5421829
232	A1	GSE179610	h1930002	A5-A7	cortex	6	PC	2	L2/3-IT	L23_IT_1	L2/3-IT	19	Telencephalic excitatory neurons	1619	0.528413	GSM5421835
233	A1	GSE179610	h1930002	A5-A7	cortex	6	PC	2	L5-IT	L5_IT_2	L4_6	18	Telencephalic excitatory neurons	1522	0.647175	GSM5421846
234	A1	GSE179610	h1930002	A5-A7	cortex	6	PC	2	L2/3-IT	L23_IT_6	L2/3-IT	19	Telencephalic excitatory neurons	1359	0.472406	GSM5421851
235	A1	GSE179610	h1930002	A5-A7	cortex	6	PC	2	L5-IT	L5_IT_1	L4_6	18	Telencephalic excitatory neurons	1252	0.523562	GSM5421877
236	A1	GSE179610	h1930002	A5-A7	cortex	6	PC	2	L2/3-IT	L23_IT_4	L2/3-IT	19	Telencephalic excitatory neurons	1527	0.453176	GSM5421878
237	A1	GSE179610	h1930002	A5-A7	cortex	6	PC	2	L4-IT	L4_IT_0	L4_6	18	Telencephalic excitatory neurons	1282	0.563963	GSM5421879
238	A1	GSE179610	h1930002	A5-A7	cortex	6	PC	2	L2/3-IT	L23_IT_2	L2/3-IT	19	Telencephalic excitatory neurons	1067	0.417057	GSM5421880
239	A1	GSE179610	h1930002	A5-A7	cortex	6	PC	2	L6b	L6b_0	L4_6	18	Telencephalic excitatory neurons	1697	0.468474	GSM5421881
240	A1	GSE179610	h1930002	A5-A7	cortex	6	PC	2	L2/3-IT	L23_IT_2	L2/3-IT	19	Telencephalic excitatory neurons	1056	0.456439	GSM5421882
241	A1	GSE179610	h1930002	A5-A7	cortex	6	PC	2	L2/3-IT	L23_IT_3	L2/3-IT	19	Telencephalic excitatory neurons	1459	0.525703	GSM5421886
242	A1	GSE179610	h1930002	A5-A7	cortex	6	PC	2	L2/3-IT	L23_IT_4	L2/3-IT	19	Telencephalic excitatory neurons	1122	0.482175	GSM5421887
243	A1	GSE179610	h1930002	A5-A7	cortex	6	PC	2	L2/3-IT	L23_IT_4	L2/3-IT	19	Telencephalic excitatory neurons	1212	0.512376	GSM5421897
244	A1	GSE179610	h1930002	A5-A7	cortex	6	PC	2	L6b	L6b_0	L4_6	18	Telencephalic excitatory neurons	1229	0.443613	GSM5421907
245	A1	GSE179610	h1930002	A5-A7	cortex	6	PC	2	L2/3-IT	L23_IT_4	L2/3-IT	19	Telencephalic excitatory neurons	1230	0.485366	GSM5421910
246	A1	GSE179610	h1930002	A5-A7	cortex	6	PC	2	L6-IT	L6_IT_2	L4_6	18	Telencephalic excitatory neurons	1401	0.587438	GSM5421916
247	A1	GSE179610	h1930002	A5-A7	cortex	6	PC	2	L5-IT	L5_IT_1	L4_6	18	Telencephalic excitatory neurons	1281	0.612542	GSM5421917
248	A1	GSE179610	h1930002	A5-A7	cortex	6	PC	2	L2/3-IT	L23_IT_2	L2/3-IT	19	Telencephalic excitatory neurons	1241	0.467768	GSM5421918
249	A1	GSE179610	h1930002	A5-A7	cortex	6	PC	2	L2/3-IT	L23_IT_2	L2/3-IT	19	Telencephalic excitatory neurons	1360	0.458088	GSM5421924
250	A1	GSE179610	h1930002	A5-A7	cortex	6	PC	2	L2/3-IT	L23_IT_4	L2/3-IT	19	Telencephalic excitatory neurons	1209	0.543424	GSM5421927
251	A1	GSE179610	h1930002	A5-A7	cortex	6	PC	2	L6b	L6b_0	L4_6	18	Telencephalic excitatory neurons	1778	0.472722	GSM5421929
252	A1	GSE179610	h1930002	A5-A7	cortex	6	PC	2	L2/3-IT	L23_IT_2	L2/3-IT	19	Telencephalic excitatory neurons	1327	0.380558	GSM5421930
253	A1	GSE179610	h1930002	A5-A7	cortex	6	PC	2	L2/3-IT	L23_IT_0	L2/3-IT	19	Telencephalic excitatory neurons	1847	0.538441	GSM5421933
254	A1	GSE179610	h1930002	A5-A7	cortex	6	PC	2	L6-IT	L6_IT_4	L4_6	18	Telencephalic excitatory neurons	1235	0.487247	GSM5421934
255	A1	GSE179610	h1930002	A5-A7	cortex	6	PC	2	L6-IT-Car3	L6_IT_Car3_2	L4_6	18	Telencephalic excitatory neurons	1509	0.631875	GSM5421936
256	A1	GSE179610	h1930002	A5-A7	cortex	6	PC	2	L2/3-IT	L23_IT_4	L2/3-IT	19	Telencephalic excitatory neurons	1562	0.596671	GSM5421938
257	A1	GSE179610	h1930002	A5-A7	cortex	6	PC	2	L5-IT	L5_IT_0	L4_6	18	Telencephalic excitatory neurons	1280	0.69375	GSM5421940
258	A1	GSE179610	h1930002	A5-A7	cortex	6	PC	2	L6-CT	L6_CT_0	L4_6	18	Telencephalic excitatory neurons	1292	0.628483	GSM5421941
259	A1	GSE179610	h1930002	A5-A7	cortex	6	PC	2	L2/3-IT	L23_IT_4	L2/3-IT	19	Telencephalic excitatory neurons	1628	0.420147	GSM5421945
260	A1	GSE179610	h1930002	A5-A7	cortex	6	PC	2	L2/3-IT	L23_IT_2	L2/3-IT	19	Telencephalic excitatory neurons	1692	0.518322	GSM5421946
261	A1	GSE179610	h1930002	A5-A7	cortex	6	PC	2	L2/3-IT	L23_IT_6	L2/3-IT	19	Telencephalic excitatory neurons	1314	0.506088	GSM5421947
262	A1	GSE179610	h1930002	A5-A7	cortex	6	PC	2	L2/3-IT	L23_IT_5	L2/3-IT	19	Telencephalic excitatory neurons	1357	0.484893	GSM5421948
263	A1	GSE179610	h1930002	A5-A7	cortex	6	PC	2	L6-IT-Car3	L6_IT_Car3_0	L4_6	18	Telencephalic excitatory neurons	1260	0.618056	GSM5421949
264	A1	GSE179610	h1930002	A5-A7	cortex	6	PC	2	L2/3-IT	L23_IT_5	L2/3-IT	19	Telencephalic excitatory neurons	1529	0.466972	GSM5421951
265	A1	GSE179610	h1930002	A5-A7	cortex	6	PC	2	L2/3-IT	L23_IT_8	L2/3-IT	19	Telencephalic excitatory neurons	1329	0.438299	GSM5421954
266	A1	GSE179610	h1930002	A5-A7	cortex	6	PC	2	L2/3-IT	L23_IT_4	L2/3-IT	19	Telencephalic excitatory neurons	1320	0.478409	GSM5421955
267	A1	GSE179610	h1930002	A5-A7	cortex	6	PC	2	L2/3-IT	L23_IT_3	L2/3-IT	19	Telencephalic excitatory neurons	1226	0.535889	GSM5421963
268	A1	GSE179610	h1930002	A5-A7	cortex	6	PC	2	L2/3-IT	L23_IT_0	L2/3-IT	19	Telencephalic excitatory neurons	1570	0.541401	GSM5421979
269	A1	GSE179610	h1930002	A5-A7	cortex	6	PC	2	L2/3-IT	L23_IT_4	L2/3-IT	19	Telencephalic excitatory neurons	1226	0.460033	GSM5421983
270	A1	GSE179610	h1930002	A5-A7	cortex	6	PC	2	L2/3-IT	L23_IT_4	L2/3-IT	19	Telencephalic excitatory neurons	1503	0.457418	GSM5421990
271	A1	GSE179610	h1930002	A5-A7	cortex	6	PC	2	L2/3-IT	L23_IT_4	L2/3-IT	19	Telencephalic excitatory neurons	1109	0.477908	GSM5421995
272	A1	GSE179610	h1930002	A5-A7	cortex	6	PC	2	L5-IT	L5_IT_2	L4_6	18	Telencephalic excitatory neurons	1415	0.571378	GSM5421999
273	A1	GSE179610	h1930002	A5-A7	cortex	6	PC	2	L5-IT	L5_IT_0	L4_6	18	Telencephalic excitatory neurons	1466	0.684516	GSM5422006
274	A1	GSE179610	h1930002	A5-A7	cortex	6	PC	2	L4-IT	L4_IT_2	L4_6	18	Telencephalic excitatory neurons	1415	0.616254	GSM5422013
275	A1	GSE179610	h1930002	A5-A7	cortex	6	PC	2	L2/3-IT	L23_IT_5	L2/3-IT	19	Telencephalic excitatory neurons	1409	0.458481	GSM5422015
276	A1	GSE179610	h1930002	A5-A7	cortex	6	PC	2	L4-IT	L4_IT_0	L4_6	18	Telencephalic excitatory neurons	1679	0.564622	GSM5422017
277	A1	GSE179610	h1930002	A5-A7	cortex	6	PC	2	L2/3-IT	L23_IT_4	L2/3-IT	19	Telencephalic excitatory neurons	1635	0.519266	GSM5422019
278	A1	GSE179610	h1930002	A5-A7	cortex	6	PC	2	L2/3-IT	L23_IT_5	L2/3-IT	19	Telencephalic excitatory neurons	1685	0.469139	GSM5422021
279	A1	GSE179610	h1930002	A5-A7	cortex	6	PC	2	L6-IT	L6_IT_2	L4_6	18	Telencephalic excitatory neurons	1802	0.574084	GSM5422022
280	A1	GSE179610	h1930002	A5-A7	cortex	6	PC	2	L5-IT	L5_IT_1	L4_6	18	Telencephalic excitatory neurons	1384	0.589595	GSM5422025
281	A1	GSE179610	h1930002	A5-A7	cortex	6	PC	2	L5-IT	L45_IT_1	L4_6	18	Telencephalic excitatory neurons	1445	0.660208	GSM5422026
282	A1	GSE179610	h1930002	A5-A7	cortex	6	PC	2	L2/3-IT	L23_IT_2	L2/3-IT	19	Telencephalic excitatory neurons	1417	0.436838	GSM5422027
283	A1	GSE179610	h1930002	A5-A7	cortex	6	PC	2	L2/3-IT	L23_IT_2	L2/3-IT	19	Telencephalic excitatory neurons	1747	0.490555	GSM5422028
284	A1	GSE179610	h1930002	A5-A7	cortex	6	PC	2	L5/6-NP	L56_NP_2	L4_6	18	Telencephalic excitatory neurons	1549	0.812137	GSM5422029
285	A1	GSE179610	h1930002	A5-A7	cortex	6	PC	2	L4-IT	L4_IT_0	L4_6	18	Telencephalic excitatory neurons	1567	0.569879	GSM5422030
286	A1	GSE179610	h1930002	A5-A7	cortex	6	PC	2	L5-IT	L5_IT_2	L4_6	18	Telencephalic excitatory neurons	1555	0.57492	GSM5422032
287	A1	GSE179610	h1930002	A5-A7	cortex	6	PC	2	L2/3-IT	L23_IT_0	L2/3-IT	19	Telencephalic excitatory neurons	2082	0.5317	GSM5422034
288	A1	GSE179610	h1930002	A5-A7	cortex	6	PC	2	L5-IT	L5_IT_1	L4_6	18	Telencephalic excitatory neurons	1241	0.55278	GSM5422036
289	A1	GSE179610	h1930002	A5-A7	cortex	6	PC	2	L4-IT	L4_IT_0	L4_6	18	Telencephalic excitatory neurons	1539	0.623132	GSM5422037
290	A1	GSE179610	h1930002	A5-A7	cortex	6	PC	2	L2/3-IT	L23_IT_2	L2/3-IT	19	Telencephalic excitatory neurons	1309	0.398778	GSM5422038
291	A1	GSE179610	h1930002	A5-A7	cortex	6	PC	2	L6-IT-Car3	L6_IT_Car3_2	L4_6	18	Telencephalic excitatory neurons	1600	0.636667	GSM5422039
292	A1	GSE179610	h1930002	A5-A7	cortex	6	PC	2	L2/3-IT	L23_IT_5	L2/3-IT	19	Telencephalic excitatory neurons	1221	0.41769	GSM5422041
293	A1	GSE179610	h1930002	A5-A7	cortex	6	PC	2	L2/3-IT	L23_IT_6	L2/3-IT	19	Telencephalic excitatory neurons	1780	0.469663	GSM5422044
294	A1	GSE179610	h1930002	A5-A7	cortex	6	PC	2	L4-IT	L4_IT_3	L4_6	18	Telencephalic excitatory neurons	1077	0.497679	GSM5422046
295	A1	GSE179610	h1930002	A5-A7	cortex	6	PC	2	L5-IT	L5_IT_2	L4_6	18	Telencephalic excitatory neurons	1619	0.596973	GSM5422047
296	A1	GSE179610	h1930002	A5-A7	cortex	6	PC	2	L5-IT	L5_IT_3	L4_6	18	Telencephalic excitatory neurons	1744	0.540711	GSM5422048
297	A1	GSE179610	h1930002	A5-A7	cortex	6	PC	2	L2/3-IT	L23_IT_5	L2/3-IT	19	Telencephalic excitatory neurons	1148	0.497242	GSM5422050
298	A1	GSE179610	h1930002	A5-A7	cortex	6	PC	2	L2/3-IT	L23_IT_4	L2/3-IT	19	Telencephalic excitatory neurons	1303	0.450883	GSM5422052
299	A1	GSE179610	h1930002	A5-A7	cortex	6	PC	2	L2/3-IT	L23_IT_4	L2/3-IT	19	Telencephalic excitatory neurons	1254	0.460526	GSM5422053
300	A1	GSE179610	h1930002	A5-A7	cortex	6	PC	2	L5-IT	L5_IT_1	L4_6	18	Telencephalic excitatory neurons	1897	0.492356	GSM5422054
301	A1	GSE179610	h1930002	A5-A7	cortex	6	PC	2	L5-IT	L5_IT_0	L4_6	18	Telencephalic excitatory neurons	1680	0.732143	GSM5422055
302	A1	GSE179610	h1930002	A5-A7	cortex	6	PC	2	L2/3-IT	L23_IT_7	L2/3-IT	19	Telencephalic excitatory neurons	1569	0.499363	GSM5422056
303	A1	GSE179610	h1930002	A5-A7	cortex	6	PC	2	L2/3-IT	L23_IT_6	L2/3-IT	19	Telencephalic excitatory neurons	1720	0.472674	GSM5422059
304	A1	GSE179610	h1930002	A5-A7	cortex	6	PC	2	L5-IT	L5_IT_0	L4_6	18	Telencephalic excitatory neurons	1622	0.710234	GSM5422060
305	A1	GSE179610	h1930002	A5-A7	cortex	6	PC	2	L2/3-IT	L23_IT_5	L2/3-IT	19	Telencephalic excitatory neurons	1686	0.423488	GSM5422062
306	A1	GSE179610	h1930002	A5-A7	cortex	6	PC	2	L2/3-IT	L23_IT_9	L2/3-IT	19	Telencephalic excitatory neurons	1727	0.459467	GSM5422063
307	A1	GSE179610	h1930002	A5-A7	cortex	6	PC	2	L2/3-IT	L23_IT_1	L2/3-IT	19	Telencephalic excitatory neurons	1670	0.507784	GSM5422064
308	A1	GSE179610	h1930002	A5-A7	cortex	6	PC	2	L2/3-IT	L23_IT_3	L2/3-IT	19	Telencephalic excitatory neurons	1334	0.485007	GSM5422065
309	A1	GSE179610	h1930002	A5-A7	cortex	6	PC	2	L2/3-IT	L23_IT_4	L2/3-IT	19	Telencephalic excitatory neurons	1513	0.460674	GSM5422066
310	A1	GSE179610	h1930002	A5-A7	cortex	6	PC	2	L5/6-NP	L56_NP_3	L4_6	18	Telencephalic excitatory neurons	1542	0.710117	GSM5422068
311	A1	GSE179610	h1930002	A5-A7	cortex	6	PC	2	L4-IT	L4_IT_3	L4_6	18	Telencephalic excitatory neurons	1471	0.515296	GSM5422069
312	A1	GSE179610	h1930002	A5-A7	cortex	6	PC	2	L2/3-IT	L23_IT_1	L2/3-IT	19	Telencephalic excitatory neurons	1238	0.498384	GSM5422070
313	A1	GSE179610	h1930002	A5-A7	cortex	6	PC	2	L6-IT	L6_IT_2	L4_6	18	Telencephalic excitatory neurons	1777	0.557681	GSM5422074
314	A1	GSE179610	h1930002	A5-A7	cortex	6	PC	2	L4-IT	L4_IT_0	L4_6	18	Telencephalic excitatory neurons	1247	0.59182	GSM5422076
315	A1	GSE179610	h1930002	A5-A7	cortex	6	PC	2	L2/3-IT	L23_IT_2	L2/3-IT	19	Telencephalic excitatory neurons	1749	0.452258	GSM5422077
316	A1	GSE179610	h1930002	A5-A7	cortex	6	PC	2	L4-IT	L4_IT_0	L4_6	18	Telencephalic excitatory neurons	1235	0.514575	GSM5422081
317	A1	GSE179610	h1930002	A5-A7	cortex	6	PC	2	L2/3-IT	L23_IT_8	L2/3-IT	19	Telencephalic excitatory neurons	1634	0.376377	GSM5422084
318	A1	GSE179610	h1930002	A5-A7	cortex	6	PC	2	L5-IT	L5_IT_2	L4_6	18	Telencephalic excitatory neurons	1624	0.691502	GSM5422087
319	A1	GSE179610	h1930002	A5-A7	cortex	6	PC	2	L2/3-IT	L23_IT_5	L2/3-IT	19	Telencephalic excitatory neurons	1829	0.476217	GSM5422089
320	A1	GSE179610	h1930002	A5-A7	cortex	6	PC	2	L2/3-IT	L23_IT_6	L2/3-IT	19	Telencephalic excitatory neurons	1587	0.487983	GSM5422091
321	A1	GSE179610	h1930002	A5-A7	cortex	6	PC	2	L2/3-IT	L23_IT_0	L2/3-IT	19	Telencephalic excitatory neurons	1955	0.523018	GSM5422092
322	A1	GSE179610	h1930002	A5-A7	cortex	6	PC	2	L4-IT	L4_IT_0	L4_6	18	Telencephalic excitatory neurons	1101	0.565849	GSM5422095
323	A1	GSE179610	h1930002	A5-A7	cortex	6	PC	2	L2/3-IT	L23_IT_4	L2/3-IT	19	Telencephalic excitatory neurons	1788	0.459172	GSM5422097
324	A1	GSE179610	h1930002	A5-A7	cortex	6	PC	2	L2/3-IT	L23_IT_4	L2/3-IT	19	Telencephalic excitatory neurons	1257	0.466985	GSM5422098
325	A1	GSE179610	h1930002	A5-A7	cortex	6	PC	2	L2/3-IT	L23_IT_5	L2/3-IT	19	Telencephalic excitatory neurons	1396	0.459229	GSM5422099
326	A1	GSE179610	h1930002	A5-A7	cortex	6	PC	2	L2/3-IT	L23_IT_5	L2/3-IT	19	Telencephalic excitatory neurons	1313	0.444021	GSM5422100
327	A1	GSE179610	h1930002	A5-A7	cortex	6	PC	2	L2/3-IT	L23_IT_2	L2/3-IT	19	Telencephalic excitatory neurons	1558	0.435815	GSM5422102
328	A1	GSE179610	h1930002	A5-A7	cortex	6	PC	2	L2/3-IT	L23_IT_4	L2/3-IT	19	Telencephalic excitatory neurons	1458	0.473937	GSM5422103
329	A1	GSE179610	h1930002	A5-A7	cortex	6	PC	2	L2/3-IT	L23_IT_5	L2/3-IT	19	Telencephalic excitatory neurons	1476	0.457656	GSM5422105
330	A1	GSE179610	h1930002	A5-A7	cortex	6	PC	2	L2/3-IT	L23_IT_0	L2/3-IT	19	Telencephalic excitatory neurons	1257	0.518695	GSM5422106
331	A1	GSE179610	h1930002	A5-A7	cortex	6	PC	2	L6b	L6b_0	L4_6	18	Telencephalic excitatory neurons	1192	0.454279	GSM5422109
332	A1	GSE179610	h1930002	A5-A7	cortex	6	PC	2	L6-IT	L6_IT_0	L4_6	18	Telencephalic excitatory neurons	1284	0.494938	GSM5422119
333	A1	GSE179610	h1930002	A5-A7	cortex	6	PC	2	L4-IT	L4_IT_1	L4_6	18	Telencephalic excitatory neurons	1555	0.573955	GSM5422120
334	A1	GSE179610	h1930002	A5-A7	cortex	6	PC	2	L2/3-IT	L23_IT_4	L2/3-IT	19	Telencephalic excitatory neurons	1196	0.458194	GSM5422121
335	A1	GSE179610	h1930002	A5-A7	cortex	6	PC	2	L2/3-IT	L23_IT_8	L2/3-IT	19	Telencephalic excitatory neurons	1629	0.40577	GSM5422125
336	A1	GSE179610	h1930002	A5-A7	cortex	6	PC	2	L5-IT	L5_IT_2	L4_6	18	Telencephalic excitatory neurons	1155	0.6671	GSM5422128
337	A1	GSE179610	h1930002	A5-A7	cortex	6	PC	2	L2/3-IT	L23_IT_4	L2/3-IT	19	Telencephalic excitatory neurons	1680	0.488889	GSM5422129
338	A1	GSE179610	h1930002	A5-A7	cortex	6	PC	2	L5-IT	L5_IT_2	L4_6	18	Telencephalic excitatory neurons	1547	0.683258	GSM5422130
339	A1	GSE179610	h1930002	A5-A7	cortex	6	PC	2	L4-IT	L4_IT_2	L4_6	18	Telencephalic excitatory neurons	1846	0.610509	GSM5422134
340	A1	GSE179610	h1930002	A5-A7	cortex	6	PC	2	L2/3-IT	L23_IT_2	L2/3-IT	19	Telencephalic excitatory neurons	1374	0.457787	GSM5422135
341	A1	GSE179610	h1930002	A5-A7	cortex	6	PC	2	L6-IT	L6_IT_2	L4_6	18	Telencephalic excitatory neurons	1375	0.552727	GSM5422137
342	A1	GSE179610	h1930002	A5-A7	cortex	6	PC	2	L2/3-IT	L23_IT_5	L2/3-IT	19	Telencephalic excitatory neurons	1736	0.456221	GSM5422139
343	A1	GSE179610	h1930002	A5-A7	cortex	6	PC	2	L4-IT	L4_IT_0	L4_6	18	Telencephalic excitatory neurons	1803	0.600481	GSM5422140
344	A1	GSE179610	h1930002	A5-A7	cortex	6	PC	2	L2/3-IT	L23_IT_6	L2/3-IT	19	Telencephalic excitatory neurons	1386	0.507215	GSM5422141
345	A1	GSE179610	h1930002	A5-A7	cortex	6	PC	2	L4-IT	L4_IT_0	L4_6	18	Telencephalic excitatory neurons	1206	0.556523	GSM5422145
346	A1	GSE179610	h1930002	A5-A7	cortex	6	PC	2	L2/3-IT	L23_IT_2	L2/3-IT	19	Telencephalic excitatory neurons	1144	0.429633	GSM5422148
347	A1	GSE179610	h1930002	A5-A7	cortex	6	PC	2	L5-IT	L5_IT_0	L4_6	18	Telencephalic excitatory neurons	1411	0.730687	GSM5422149
348	A1	GSE179610	h1930002	A5-A7	cortex	6	PC	2	L2/3-IT	L23_IT_0	L2/3-IT	19	Telencephalic excitatory neurons	1876	0.507196	GSM5422152
349	A1	GSE179610	h1930002	A5-A7	cortex	6	PC	2	L2/3-IT	L23_IT_2	L2/3-IT	19	Telencephalic excitatory neurons	1388	0.486671	GSM5422153
350	A1	GSE179610	h1930002	A5-A7	cortex	6	PC	2	L2/3-IT	L23_IT_3	L2/3-IT	19	Telencephalic excitatory neurons	1723	0.528149	GSM5422154
351	A1	GSE179610	h1930002	A5-A7	cortex	6	PC	2	L2/3-IT	L23_IT_4	L2/3-IT	19	Telencephalic excitatory neurons	1570	0.46051	GSM5422155
352	A1	GSE179610	h1930002	A5-A7	cortex	6	PC	2	L2/3-IT	L23_IT_6	L2/3-IT	19	Telencephalic excitatory neurons	1787	0.459989	GSM5422158
353	A1	GSE179610	h1930002	A5-A7	cortex	6	PC	2	L4-IT	L4_IT_0	L4_6	18	Telencephalic excitatory neurons	1627	0.524278	GSM5422160
354	A1	GSE179610	h1930002	A5-A7	cortex	6	PC	2	L2/3-IT	L23_IT_0	L2/3-IT	19	Telencephalic excitatory neurons	1185	0.484388	GSM5422161
355	A1	GSE179610	h1930002	A5-A7	cortex	6	PC	2	L2/3-IT	L23_IT_4	L2/3-IT	19	Telencephalic excitatory neurons	1575	0.448466	GSM5422165
356	A1	GSE179610	h1930002	A5-A7	cortex	6	PC	2	L4-IT	L4_IT_2	L4_6	18	Telencephalic excitatory neurons	1916	0.580376	GSM5422166
357	A1	GSE179610	h1930002	A5-A7	cortex	6	PC	2	L5-IT	L5_IT_0	L4_6	18	Telencephalic excitatory neurons	1870	0.68877	GSM5422168
358	A1	GSE179610	h1930002	A5-A7	cortex	6	PC	2	L5-IT	L5_IT_2	L4_6	18	Telencephalic excitatory neurons	1433	0.511165	GSM5422169
359	A1	GSE179610	h1930002	A5-A7	cortex	6	PC	2	L2/3-IT	L23_IT_4	L2/3-IT	19	Telencephalic excitatory neurons	1647	0.453552	GSM5422170
360	A1	GSE179610	h1930002	A5-A7	cortex	6	PC	2	L5/6-NP	L56_NP_0	L4_6	18	Telencephalic excitatory neurons	1620	0.732716	GSM5422171
361	A1	GSE179610	h1930002	A5-A7	cortex	6	PC	2	L2/3-IT	L23_IT_2	L2/3-IT	19	Telencephalic excitatory neurons	1445	0.379239	GSM5422172
362	A1	GSE179610	h1930002	A5-A7	cortex	6	PC	2	L2/3-IT	L23_IT_2	L2/3-IT	19	Telencephalic excitatory neurons	1506	0.411023	GSM5422177
363	A1	GSE179610	h1930002	A5-A7	cortex	6	PC	2	L2/3-IT	L23_IT_4	L2/3-IT	19	Telencephalic excitatory neurons	1278	0.474178	GSM5422179
364	A1	GSE179610	h1930002	A5-A7	cortex	6	PC	2	L2/3-IT	L23_IT_8	L2/3-IT	19	Telencephalic excitatory neurons	1332	0.378629	GSM5422180
365	A1	GSE179610	h1930002	A5-A7	cortex	6	PC	2	L2/3-IT	L23_IT_3	L2/3-IT	19	Telencephalic excitatory neurons	1386	0.571429	GSM5422181
366	A1	GSE179610	h1930002	A5-A7	cortex	6	PC	2	L5/6-NP	L56_NP_2	L4_6	18	Telencephalic excitatory neurons	1673	0.822773	GSM5422184
367	A1	GSE179610	h1930002	A5-A7	cortex	6	PC	2	L2/3-IT	L23_IT_4	L2/3-IT	19	Telencephalic excitatory neurons	1675	0.481493	GSM5422185
368	A1	GSE179610	h1930002	A5-A7	cortex	6	PC	2	L6-IT	L6_IT_4	L4_6	18	Telencephalic excitatory neurons	1562	0.569142	GSM5422188
369	A1	GSE179610	h1930002	A5-A7	cortex	6	PC	2	L2/3-IT	L23_IT_8	L2/3-IT	19	Telencephalic excitatory neurons	1683	0.602496	GSM5422189
370	A1	GSE179610	h1930002	A5-A7	cortex	6	PC	2	L2/3-IT	L23_IT_2	L2/3-IT	19	Telencephalic excitatory neurons	1672	0.397727	GSM5422190
371	A1	GSE179610	h1930002	A5-A7	cortex	6	PC	2	L4-IT	L4_IT_0	L4_6	18	Telencephalic excitatory neurons	1184	0.506757	GSM5422191
372	A1	GSE179610	h1930002	A5-A7	cortex	6	PC	2	L4-IT	L4_IT_2	L4_6	18	Telencephalic excitatory neurons	1656	0.513285	GSM5422192
373	A1	GSE179610	h1930002	A5-A7	cortex	6	PC	2	L2/3-IT	L23_IT_6	L2/3-IT	19	Telencephalic excitatory neurons	1431	0.54123	GSM5422194
374	A1	GSE179610	h1930002	A5-A7	cortex	6	PC	2	L2/3-IT	L23_IT_8	L2/3-IT	19	Telencephalic excitatory neurons	1730	0.597688	GSM5422195
375	A1	GSE179610	h1930002	A5-A7	cortex	6	PC	2	L2/3-IT	L23_IT_4	L2/3-IT	19	Telencephalic excitatory neurons	1909	0.444735	GSM5422196
376	A1	GSE179610	h1930002	A5-A7	cortex	6	PC	2	L2/3-IT	L23_IT_5	L2/3-IT	19	Telencephalic excitatory neurons	1531	0.488461	GSM5422199
377	A1	GSE179610	h1930002	A5-A7	cortex	6	PC	2	L5-IT	L5_IT_3	L4_6	18	Telencephalic excitatory neurons	1138	0.587522	GSM5422200
378	A1	GSE179610	h1930002	A5-A7	cortex	6	PC	2	L2/3-IT	L23_IT_2	L2/3-IT	19	Telencephalic excitatory neurons	1788	0.478747	GSM5422202
379	A1	GSE179610	h1930002	A5-A7	cortex	6	PC	2	L5-IT	L5_IT_3	L4_6	18	Telencephalic excitatory neurons	1663	0.546603	GSM5422203
380	A1	GSE179610	h1930002	A5-A7	cortex	6	PC	2	L2/3-IT	L23_IT_4	L2/3-IT	19	Telencephalic excitatory neurons	1667	0.473905	GSM5422204
381	A1	GSE179610	h1930002	A5-A7	cortex	6	PC	2	L5-IT	L5_IT_0	L4_6	18	Telencephalic excitatory neurons	1550	0.667742	GSM5422205
382	A1	GSE179610	h1930002	A5-A7	cortex	6	PC	2	L2/3-IT	L23_IT_2	L2/3-IT	19	Telencephalic excitatory neurons	1743	0.462995	GSM5422206
383	A1	GSE179610	h1930002	A5-A7	cortex	6	PC	2	L5-IT	L5_IT_1	L4_6	18	Telencephalic excitatory neurons	1644	0.591444	GSM5422207
384	A1	GSE179610	h1930002	A5-A7	cortex	6	PC	2	L6-IT-Car3	L6_IT_Car3_0	L4_6	18	Telencephalic excitatory neurons	1667	0.664067	GSM5422209
385	A1	GSE179610	h1930002	A5-A7	cortex	6	PC	2	L2/3-IT	L23_IT_5	L2/3-IT	19	Telencephalic excitatory neurons	1413	0.5046	GSM5422210
386	A1	GSE179610	h1930002	A5-A7	cortex	6	PC	2	L2/3-IT	L23_IT_5	L2/3-IT	19	Telencephalic excitatory neurons	1711	0.495324	GSM5422211
387	A1	GSE179610	h1930002	A5-A7	cortex	6	PC	2	L5-IT	L45_IT_1	L4_6	18	Telencephalic excitatory neurons	1262	0.664818	GSM5422212
388	A1	GSE179610	h1930002	A5-A7	cortex	6	PC	2	L2/3-IT	L23_IT_2	L2/3-IT	19	Telencephalic excitatory neurons	1379	0.46773	GSM5422213
389	A1	GSE179610	h1930002	A5-A7	cortex	6	PC	2	L2/3-IT	L23_IT_2	L2/3-IT	19	Telencephalic excitatory neurons	1242	0.485507	GSM5422214
390	A1	GSE179610	h1930002	A5-A7	cortex	6	PC	2	L2/3-IT	L23_IT_3	L2/3-IT	19	Telencephalic excitatory neurons	1727	0.498552	GSM5422216
391	A1	GSE179610	h1930002	A5-A7	cortex	6	PC	2	L5-IT	L5_IT_1	L4_6	18	Telencephalic excitatory neurons	1826	0.545181	GSM5422220
392	A1	GSE179610	h1930002	A5-A7	cortex	6	PC	2	L2/3-IT	L23_IT_4	L2/3-IT	19	Telencephalic excitatory neurons	1603	0.556145	GSM5422221
393	A1	GSE179610	h1930002	A5-A7	cortex	6	PC	2	L4-IT	L4_IT_0	L4_6	18	Telencephalic excitatory neurons	1739	0.610696	GSM5422222
394	A1	GSE179610	h1930002	A5-A7	cortex	6	PC	2	L2/3-IT	L23_IT_4	L2/3-IT	19	Telencephalic excitatory neurons	1424	0.516854	GSM5422226
395	A1	GSE179610	h1930002	A5-A7	cortex	6	PC	2	L2/3-IT	L23_IT_5	L2/3-IT	19	Telencephalic excitatory neurons	1916	0.430063	GSM5422228
396	A1	GSE179610	h1930002	A5-A7	cortex	6	PC	2	L4-IT	L4_IT_0	L4_6	18	Telencephalic excitatory neurons	1760	0.51108	GSM5422229
397	A1	GSE179610	h1930002	A5-A7	cortex	6	PC	2	L5-IT	L5_IT_1	L4_6	18	Telencephalic excitatory neurons	1195	0.491213	GSM5422230
398	A1	GSE179610	h1930002	A5-A7	cortex	6	PC	2	L2/3-IT	L23_IT_2	L2/3-IT	19	Telencephalic excitatory neurons	1559	0.420783	GSM5422232
399	A1	GSE179610	h1930002	A5-A7	cortex	6	PC	2	L2/3-IT	L23_IT_5	L2/3-IT	19	Telencephalic excitatory neurons	1628	0.442875	GSM5422233
400	A1	GSE179610	h1930002	A5-A7	cortex	6	PC	2	L2/3-IT	L23_IT_4	L2/3-IT	19	Telencephalic excitatory neurons	1265	0.449802	GSM5422234
401	A1	GSE179610	h1930002	A5-A7	cortex	6	PC	2	L6-CT	L6_CT_0	L4_6	18	Telencephalic excitatory neurons	2061	0.584182	GSM5422235
402	A1	GSE179610	h1930002	A5-A7	cortex	6	PC	2	L5-IT	L5_IT_1	L4_6	18	Telencephalic excitatory neurons	1460	0.568836	GSM5422236
403	A1	GSE179610	h1930002	A5-A7	cortex	6	PC	2	L2/3-IT	L23_IT_4	L2/3-IT	19	Telencephalic excitatory neurons	1239	0.467514	GSM5422237
404	A1	GSE179610	h1930002	A5-A7	cortex	6	PC	2	L2/3-IT	L23_IT_2	L2/3-IT	19	Telencephalic excitatory neurons	2013	0.406855	GSM5422238
405	A1	GSE179610	h1930002	A5-A7	cortex	6	PC	2	L2/3-IT	L23_IT_2	L2/3-IT	19	Telencephalic excitatory neurons	1359	0.505519	GSM5422240
406	A1	GSE179610	h1930002	A5-A7	cortex	6	PC	2	L2/3-IT	L23_IT_4	L2/3-IT	19	Telencephalic excitatory neurons	1167	0.473008	GSM5422241
407	A1	GSE179610	h1930002	A5-A7	cortex	6	PC	2	L5-IT	L5_IT_1	L4_6	18	Telencephalic excitatory neurons	1230	0.530894	GSM5422244
408	A1	GSE179610	h1930002	A5-A7	cortex	6	PC	2	L5-IT	L5_IT_3	L4_6	18	Telencephalic excitatory neurons	1397	0.591625	GSM5422245
409	A1	GSE179610	h1930002	A5-A7	cortex	6	PC	2	L2/3-IT	L23_IT_2	L2/3-IT	19	Telencephalic excitatory neurons	1567	0.48947	GSM5422246
410	A1	GSE179610	h1930002	A5-A7	cortex	6	PC	2	L2/3-IT	L23_IT_2	L2/3-IT	19	Telencephalic excitatory neurons	1281	0.43872	GSM5422250
411	A1	GSE179610	h1930002	A5-A7	cortex	6	PC	2	L2/3-IT	L23_IT_12	L2/3-IT	19	Telencephalic excitatory neurons	1974	0.511145	GSM5422252
412	A1	GSE179610	h1930002	A5-A7	cortex	6	PC	2	L6b	L6b_0	L4_6	18	Telencephalic excitatory neurons	1337	0.430815	GSM5422253
413	A1	GSE179610	h1930002	A5-A7	cortex	6	PC	2	L5/6-NP	L56_NP_2	L4_6	18	Telencephalic excitatory neurons	2670	0.707335	GSM5422254
414	A1	GSE179610	h1930002	A5-A7	cortex	6	PC	2	L2/3-IT	L23_IT_2	L2/3-IT	19	Telencephalic excitatory neurons	1693	0.464265	GSM5422256
415	A1	GSE179610	h1930002	A5-A7	cortex	6	PC	2	L2/3-IT	L23_IT_0	L2/3-IT	19	Telencephalic excitatory neurons	1379	0.49021	GSM5422258
416	A1	GSE179610	h1930002	A5-A7	cortex	6	PC	2	L6-CT	L6_CT_0	L4_6	18	Telencephalic excitatory neurons	1458	0.504973	GSM5422259
417	A1	GSE179610	h1930002	A5-A7	cortex	6	PC	2	L6-IT	L6_IT_1	L4_6	18	Telencephalic excitatory neurons	1515	0.49637	GSM5422261
418	A1	GSE179610	h1930002	A5-A7	cortex	6	PC	2	L4-IT	L4_IT_0	L4_6	18	Telencephalic excitatory neurons	1808	0.570612	GSM5422263
419	A1	GSE179610	h1930002	A5-A7	cortex	6	PC	2	L6-IT	L6_IT_2	L4_6	18	Telencephalic excitatory neurons	1724	0.488979	GSM5422266
420	A1	GSE179610	h1930002	A5-A7	cortex	6	PC	2	L2/3-IT	L23_IT_1	L2/3-IT	19	Telencephalic excitatory neurons	1792	0.512835	GSM5422267
421	A1	GSE179610	h1930002	A5-A7	cortex	6	PC	2	L2/3-IT	L23_IT_0	L2/3-IT	19	Telencephalic excitatory neurons	1475	0.54339	GSM5422269
422	A1	GSE179610	h1930002	A5-A7	cortex	6	PC	2	L6-IT	L6_IT_2	L4_6	18	Telencephalic excitatory neurons	1829	0.480044	GSM5422270
423	A1	GSE179610	h1930002	A5-A7	cortex	6	PC	2	L2/3-IT	L23_IT_2	L2/3-IT	19	Telencephalic excitatory neurons	1392	0.403376	GSM5422275
424	A1	GSE179610	h1930002	A5-A7	cortex	6	PC	2	L2/3-IT	L23_IT_0	L2/3-IT	19	Telencephalic excitatory neurons	1833	0.495636	GSM5422276
425	A1	GSE179610	h1930002	A5-A7	cortex	6	PC	2	L2/3-IT	L23_IT_8	L2/3-IT	19	Telencephalic excitatory neurons	1804	0.36918	GSM5422277
426	A1	GSE179610	h1930002	A5-A7	cortex	6	PC	2	L2/3-IT	L23_IT_4	L2/3-IT	19	Telencephalic excitatory neurons	1702	0.470476	GSM5422283
427	A1	GSE179610	h1930002	A5-A7	cortex	6	PC	2	L2/3-IT	L23_IT_4	L2/3-IT	19	Telencephalic excitatory neurons	1244	0.412379	GSM5422284
428	A1	GSE179610	h1930002	A5-A7	cortex	6	PC	2	L2/3-IT	L23_IT_4	L2/3-IT	19	Telencephalic excitatory neurons	2001	0.43928	GSM5422289
429	A1	GSE179610	h1930002	A5-A7	cortex	6	PC	2	L2/3-IT	L23_IT_0	L2/3-IT	19	Telencephalic excitatory neurons	1229	0.524003	GSM5422290
430	A1	GSE179610	h1930002	A5-A7	cortex	6	PC	2	L6b	L6b_0	L4_6	18	Telencephalic excitatory neurons	1984	0.439264	GSM5422291
431	A1	GSE179610	h1930002	A5-A7	cortex	6	PC	2	L2/3-IT	L23_IT_2	L2/3-IT	19	Telencephalic excitatory neurons	1331	0.449787	GSM5422295
432	A1	GSE179610	h1930002	A5-A7	cortex	6	PC	2	L5-IT	L45_IT_2	L4_6	18	Telencephalic excitatory neurons	1839	0.712887	GSM5422299
433	A1	GSE179610	h1930002	A5-A7	cortex	6	PC	2	L2/3-IT	L23_IT_1	L2/3-IT	19	Telencephalic excitatory neurons	1933	0.515003	GSM5422300
434	A1	GSE179610	h1930002	A5-A7	cortex	6	PC	2	L2/3-IT	L23_IT_2	L2/3-IT	19	Telencephalic excitatory neurons	2161	0.444933	GSM5422301
435	A1	GSE179610	h1930002	A5-A7	cortex	6	PC	2	L4-IT	L4_IT_0	L4_6	18	Telencephalic excitatory neurons	1188	0.577441	GSM5422303
436	A1	GSE179610	h1930002	A5-A7	cortex	6	PC	2	L4-IT	L4_IT_0	L4_6	18	Telencephalic excitatory neurons	1825	0.565479	GSM5422305
437	A1	GSE179610	h1930002	A5-A7	cortex	6	PC	2	L6b	L6b_0	L4_6	18	Telencephalic excitatory neurons	1621	0.479951	GSM5422306
438	A1	GSE179610	h1930002	A5-A7	cortex	6	PC	2	L6-CT	L6_CT_0	L4_6	18	Telencephalic excitatory neurons	1720	0.581395	GSM5422307
439	A1	GSE179610	h1930002	A5-A7	cortex	6	PC	2	L2/3-IT	L23_IT_2	L2/3-IT	19	Telencephalic excitatory neurons	1351	0.477794	GSM5422309
440	A1	GSE179610	h1930002	A5-A7	cortex	6	PC	2	L2/3-IT	L23_IT_4	L2/3-IT	19	Telencephalic excitatory neurons	1471	0.4276	GSM5422311
441	A1	GSE179610	h1930002	A5-A7	cortex	6	PC	2	L4-IT	L4_IT_0	L4_6	18	Telencephalic excitatory neurons	1406	0.558321	GSM5422313
442	A1	GSE179610	h1930002	A5-A7	cortex	6	PC	2	L2/3-IT	L23_IT_2	L2/3-IT	19	Telencephalic excitatory neurons	1724	0.48972	GSM5422316
443	A1	GSE179610	h1930002	A5-A7	cortex	6	PC	2	L5-IT	L5_IT_1	L4_6	18	Telencephalic excitatory neurons	1263	0.461203	GSM5422318
444	A1	GSE179610	h1930002	A5-A7	cortex	6	PC	2	L5-IT	L5_IT_3	L4_6	18	Telencephalic excitatory neurons	1581	0.587603	GSM5422319
445	A1	GSE179610	h1930002	A5-A7	cortex	6	PC	2	L5-IT	L5_IT_1	L4_6	18	Telencephalic excitatory neurons	1712	0.494743	GSM5422321
446	A1	GSE179610	h1930002	A5-A7	cortex	6	PC	2	L2/3-IT	L23_IT_0	L2/3-IT	19	Telencephalic excitatory neurons	1095	0.50274	GSM5422323
447	A1	GSE179610	h1930002	A5-A7	cortex	6	PC	2	L2/3-IT	L23_IT_5	L2/3-IT	19	Telencephalic excitatory neurons	1950	0.489231	GSM5422324
448	A1	GSE179610	h1930002	A5-A7	cortex	6	PC	2	L2/3-IT	L23_IT_4	L2/3-IT	19	Telencephalic excitatory neurons	1216	0.515296	GSM5422326
449	A1	GSE179610	h1930002	A5-A7	cortex	6	PC	2	L6-CT	L6_CT_0	L4_6	18	Telencephalic excitatory neurons	1379	0.504931	GSM5422330
450	A1	GSE179610	h1930002	A5-A7	cortex	6	PC	2	L2/3-IT	L23_IT_4	L2/3-IT	19	Telencephalic excitatory neurons	1989	0.489191	GSM5422331
451	A1	GSE179610	h1930002	A5-A7	cortex	6	PC	2	L2/3-IT	L23_IT_4	L2/3-IT	19	Telencephalic excitatory neurons	2155	0.47471	GSM5422332
452	A1	GSE179610	h1930002	A5-A7	cortex	6	PC	2	L2/3-IT	L23_IT_4	L2/3-IT	19	Telencephalic excitatory neurons	1683	0.494949	GSM5422335
453	A1	GSE179610	h1930002	A5-A7	cortex	6	PC	2	L6-CT	L6_CT_0	L4_6	18	Telencephalic excitatory neurons	1647	0.485124	GSM5422336
454	A1	GSE179610	h1930002	A5-A7	cortex	6	PC	2	L2/3-IT	L23_IT_5	L2/3-IT	19	Telencephalic excitatory neurons	1303	0.479279	GSM5422337
455	A1	GSE179610	h1930002	A5-A7	cortex	6	PC	2	L2/3-IT	L23_IT_8	L2/3-IT	19	Telencephalic excitatory neurons	1194	0.39531	GSM5422339
456	A1	GSE179610	h1930002	A5-A7	cortex	6	PC	2	L2/3-IT	L23_IT_7	L2/3-IT	19	Telencephalic excitatory neurons	1347	0.405345	GSM5422340
457	A1	GSE179610	h1930002	A5-A7	cortex	6	PC	2	L6-IT	L6_IT_2	L4_6	18	Telencephalic excitatory neurons	1450	0.522759	GSM5422341
458	A1	GSE179610	h1930002	A5-A7	cortex	6	PC	2	L4-IT	L4_IT_0	L4_6	18	Telencephalic excitatory neurons	1515	0.550495	GSM5422343
459	A1	GSE179610	h1930002	A5-A7	cortex	6	PC	2	L5-IT	L5_IT_1	L4_6	18	Telencephalic excitatory neurons	1577	0.580321	GSM5422344
460	A1	GSE179610	h1930002	A5-A7	cortex	6	PC	2	L2/3-IT	L23_IT_5	L2/3-IT	19	Telencephalic excitatory neurons	1459	0.453735	GSM5422345
461	A1	GSE179610	h1930002	A5-A7	cortex	6	PC	2	L5-IT	L5_IT_2	L4_6	18	Telencephalic excitatory neurons	1237	0.49259	GSM5422346
462	A1	GSE179610	h1930002	A5-A7	cortex	6	PC	2	L2/3-IT	L23_IT_5	L2/3-IT	19	Telencephalic excitatory neurons	2065	0.453753	GSM5422351
463	A1	GSE179610	h1930002	A5-A7	cortex	6	PC	2	L2/3-IT	L23_IT_4	L2/3-IT	19	Telencephalic excitatory neurons	1680	0.453869	GSM5422354
464	A1	GSE179610	h1930002	A5-A7	cortex	6	PC	2	L2/3-IT	L23_IT_6	L2/3-IT	19	Telencephalic excitatory neurons	1448	0.467541	GSM5422355
465	A1	GSE179610	h1930002	A5-A7	cortex	6	PC	2	L2/3-IT	L23_IT_4	L2/3-IT	19	Telencephalic excitatory neurons	1665	0.467267	GSM5422356
466	A1	GSE179610	h1930002	A5-A7	cortex	6	PC	2	L6-CT	L6_CT_0	L4_6	18	Telencephalic excitatory neurons	1598	0.47184	GSM5422358
467	A1	GSE179610	h1930002	A5-A7	cortex	6	PC	2	L2/3-IT	L23_IT_0	L2/3-IT	19	Telencephalic excitatory neurons	1326	0.509804	GSM5422363
468	A1	GSE179610	h1930002	A5-A7	cortex	6	PC	2	L2/3-IT	L23_IT_4	L2/3-IT	19	Telencephalic excitatory neurons	2081	0.449784	GSM5422365
469	A1	GSE179610	h1930002	A5-A7	cortex	6	PC	2	L6-CT	L6_CT_0	L4_6	18	Telencephalic excitatory neurons	2391	0.505228	GSM5422366
470	A1	GSE179610	h1930002	A5-A7	cortex	6	PC	2	L2/3-IT	L23_IT_8	L2/3-IT	19	Telencephalic excitatory neurons	1662	0.421179	GSM5422368
471	A1	GSE179610	h1930002	A5-A7	cortex	6	PC	2	L2/3-IT	L23_IT_4	L2/3-IT	19	Telencephalic excitatory neurons	1498	0.458834	GSM5422369
472	A1	GSE179610	h1930002	A5-A7	cortex	6	PC	2	L2/3-IT	L23_IT_4	L2/3-IT	19	Telencephalic excitatory neurons	1993	0.444054	GSM5422372
473	A1	GSE179610	h1930002	A5-A7	cortex	6	PC	2	L4-IT	L4_IT_2	L4_6	18	Telencephalic excitatory neurons	2226	0.504942	GSM5422373
474	A1	GSE179610	h1930002	A5-A7	cortex	6	PC	2	L2/3-IT	L23_IT_2	L2/3-IT	19	Telencephalic excitatory neurons	1637	0.409896	GSM5422374
475	A1	GSE179610	h1930002	A5-A7	cortex	6	PC	2	L2/3-IT	L23_IT_3	L2/3-IT	19	Telencephalic excitatory neurons	1677	0.540847	GSM5422376
476	A1	GSE179610	h1930002	A5-A7	cortex	6	PC	2	L5-IT	L5_IT_1	L4_6	18	Telencephalic excitatory neurons	1834	0.563795	GSM5422380
477	A1	GSE179610	h1930002	A5-A7	cortex	6	PC	2	L5-IT	L5_IT_1	L4_6	18	Telencephalic excitatory neurons	1836	0.534041	GSM5422383
478	A1	GSE179610	h1930002	A5-A7	cortex	6	PC	2	L2/3-IT	L23_IT_5	L2/3-IT	19	Telencephalic excitatory neurons	1553	0.499034	GSM5422384
479	A1	GSE179610	h1930002	A5-A7	cortex	6	PC	2	L2/3-IT	L23_IT_0	L2/3-IT	19	Telencephalic excitatory neurons	1952	0.515881	GSM5422388
480	A1	GSE179610	h1930002	A5-A7	cortex	6	PC	2	L2/3-IT	L23_IT_2	L2/3-IT	19	Telencephalic excitatory neurons	1664	0.44982	GSM5422389
481	A1	GSE179610	h1930002	A5-A7	cortex	6	PC	2	L4-IT	L4_IT_0	L4_6	18	Telencephalic excitatory neurons	2196	0.556922	GSM5422391
482	A1	GSE179610	h1930002	A5-A7	cortex	6	PC	2	L4-IT	L4_IT_0	L4_6	18	Telencephalic excitatory neurons	1576	0.605013	GSM5422392
483	A1	GSE179610	h1930002	A5-A7	cortex	6	PC	2	L2/3-IT	L23_IT_2	L2/3-IT	19	Telencephalic excitatory neurons	1671	0.389388	GSM5422394
484	A1	GSE179610	h1930002	A5-A7	cortex	6	PC	2	L2/3-IT	L23_IT_2	L2/3-IT	19	Telencephalic excitatory neurons	1390	0.402878	GSM5422395
485	A1	GSE179610	h1930002	A5-A7	cortex	6	PC	2	L2/3-IT	L23_IT_4	L2/3-IT	19	Telencephalic excitatory neurons	1500	0.403	GSM5422398
486	A1	GSE179610	h1930002	A5-A7	cortex	6	PC	2	L2/3-IT	L23_IT_4	L2/3-IT	19	Telencephalic excitatory neurons	1720	0.451163	GSM5422399
487	A1	GSE179610	h1930002	A5-A7	cortex	6	PC	2	L2/3-IT	L23_IT_4	L2/3-IT	19	Telencephalic excitatory neurons	1866	0.444266	GSM5422400
488	A1	GSE179610	h1930002	A5-A7	cortex	6	PC	2	L4-IT	L4_IT_0	L4_6	18	Telencephalic excitatory neurons	1650	0.540606	GSM5422402
489	A1	GSE179610	h1930002	A5-A7	cortex	6	PC	2	L4-IT	L4_IT_0	L4_6	18	Telencephalic excitatory neurons	1719	0.575916	GSM5422405
490	A1	GSE179610	h1930002	A5-A7	cortex	6	PC	2	L6-IT	L6_IT_2	L4_6	18	Telencephalic excitatory neurons	1397	0.556908	GSM5422409
491	A1	GSE179610	h1930002	A5-A7	cortex	6	PC	2	L2/3-IT	L23_IT_4	L2/3-IT	19	Telencephalic excitatory neurons	1624	0.523091	GSM5422410
492	A1	GSE179610	h1930002	A5-A7	cortex	6	PC	2	L2/3-IT	L23_IT_8	L2/3-IT	19	Telencephalic excitatory neurons	1424	0.383193	GSM5422411
493	A1	GSE179610	h1930002	A5-A7	cortex	6	PC	2	L5-IT	L45_IT_1	L4_6	18	Telencephalic excitatory neurons	1469	0.639324	GSM5422412
494	A1	GSE179610	h1930002	A5-A7	cortex	6	PC	2	L6-IT	L6_IT_2	L4_6	18	Telencephalic excitatory neurons	1865	0.501877	GSM5422413
495	A1	GSE179610	h1930002	A5-A7	cortex	6	PC	2	L2/3-IT	L23_IT_5	L2/3-IT	19	Telencephalic excitatory neurons	1390	0.37482	GSM5422415
496	A2	GSE203373	h1930002	ITG	cortex	6	TC	4	Sst	Sst_1	Sst	12	Inhibitory/non-telencephalic neurons	2184	0.59478	GSM6167648
518	A2	GSE203373	h1930002	ITG	cortex	6	TC	4	Vip	Vip_8	Vip	11	Inhibitory/non-telencephalic neurons	1861	0.636754	GSM6167852
530	A2	GSE203373	h1930002	ITG	cortex	6	TC	4	Pvalb	Pvalb_1	Pvalb	13	Inhibitory/non-telencephalic neurons	1164	0.683849	GSM6167918
536	A2	GSE203373	h1930002	ITG	cortex	6	TC	4	Pvalb	Pvalb_1	Pvalb	13	Inhibitory/non-telencephalic neurons	857	0.737456	GSM6167968
569	A2	GSE203373	h1930002	ITG	cortex	6	TC	4	Sncg	Sncg_3	Sncg	10	Inhibitory/non-telencephalic neurons	842	0.583135	GSM6168198
571	A2	GSE203373	h1930002	ITG	cortex	6	TC	4	Vip	Vip_7	Vip	11	Inhibitory/non-telencephalic neurons	872	0.595183	GSM6168203
575	A2	GSE203373	h1930002	ITG	cortex	6	TC	4	Vip	Vip_6	Vip	11	Inhibitory/non-telencephalic neurons	804	0.727612	GSM6168219
[truncated: 15,659 more rows]

## Sheet: H04_cells
ID	array	GSE	Donor	Region	MR	MR#	cortex	cortex#	MajorType	SubType	MT	MT#	CellClass	fCpGcounts	aveMe	GSM
[truncated: 15,434 more rows]
