# Supplementary material for: Human brain ancestral barcodes
Source: eLife. 2025 Jun 10;13:RP101163. doi: 10.7554/eLife.101163 (PMC12151537; doi:10.7554/eLife.101163)
Supplement: Supplementary file 5. [file elife-101163-supp5.xlsx]

## Sheet: GSE208051_04_MTG_1
			ID	2	3	4	5	6	7	8	9	10	11	13	14	15	16	17	18	20	22	23	24	27	28	33	34	36	38	39	40	42	43	45	46	47	48	49	50	51	54	55	56	57	58	59	61	62	64
			array	A1	A1	A1	A1	A1	A1	A1	A1	A1	A1	A1	A1	A1	A1	A1	A1	A1	A1	A1	A1	A1	A1	A1	A1	A1	A1	A1	A1	A1	A1	A1	A1	A1	A1	A1	A1	A1	A1	A1	A1	A1	A1	A1	A1	A1	A1
			GSE	GSE208051	GSE208051	GSE208051	GSE208051	GSE208051	GSE208051	GSE208051	GSE208051	GSE208051	GSE208051	GSE208051	GSE208051	GSE208051	GSE208051	GSE208051	GSE208051	GSE208051	GSE208051	GSE208051	GSE208051	GSE208051	GSE208051	GSE208051	GSE208051	GSE208051	GSE208051	GSE208051	GSE208051	GSE208051	GSE208051	GSE208051	GSE208051	GSE208051	GSE208051	GSE208051	GSE208051	GSE208051	GSE208051	GSE208051	GSE208051	GSE208051	GSE208051	GSE208051	GSE208051	GSE208051	GSE208051
			Donor	h1930004	h1930004	h1930004	h1930004	h1930004	h1930004	h1930004	h1930004	h1930004	h1930004	h1930004	h1930004	h1930004	h1930004	h1930004	h1930004	h1930004	h1930004	h1930004	h1930004	h1930004	h1930004	h1930004	h1930004	h1930004	h1930004	h1930004	h1930004	h1930004	h1930004	h1930004	h1930004	h1930004	h1930004	h1930004	h1930004	h1930004	h1930004	h1930004	h1930004	h1930004	h1930004	h1930004	h1930004	h1930004	h1930004
			Region	MTG	MTG	MTG	MTG	MTG	MTG	MTG	MTG	MTG	MTG	MTG	MTG	MTG	MTG	MTG	MTG	MTG	MTG	MTG	MTG	MTG	MTG	MTG	MTG	MTG	MTG	MTG	MTG	MTG	MTG	MTG	MTG	MTG	MTG	MTG	MTG	MTG	MTG	MTG	MTG	MTG	MTG	MTG	MTG	MTG	MTG
			MR	cortex	cortex	cortex	cortex	cortex	cortex	cortex	cortex	cortex	cortex	cortex	cortex	cortex	cortex	cortex	cortex	cortex	cortex	cortex	cortex	cortex	cortex	cortex	cortex	cortex	cortex	cortex	cortex	cortex	cortex	cortex	cortex	cortex	cortex	cortex	cortex	cortex	cortex	cortex	cortex	cortex	cortex	cortex	cortex	cortex	cortex
			MR#	6	6	6	6	6	6	6	6	6	6	6	6	6	6	6	6	6	6	6	6	6	6	6	6	6	6	6	6	6	6	6	6	6	6	6	6	6	6	6	6	6	6	6	6	6	6
			cortex	TC	TC	TC	TC	TC	TC	TC	TC	TC	TC	TC	TC	TC	TC	TC	TC	TC	TC	TC	TC	TC	TC	TC	TC	TC	TC	TC	TC	TC	TC	TC	TC	TC	TC	TC	TC	TC	TC	TC	TC	TC	TC	TC	TC	TC	TC
			cortex#	4	4	4	4	4	4	4	4	4	4	4	4	4	4	4	4	4	4	4	4	4	4	4	4	4	4	4	4	4	4	4	4	4	4	4	4	4	4	4	4	4	4	4	4	4	4
			MajorType	Vip	Sst	Sst	Sst	Vip	Sst	Vip	Sst	Sst	Vip	Sncg	Sst	Lamp5	Sst	Pvalb	Sst	Vip	Lamp5	Pvalb	Pvalb	Sst	Vip	Vip	Lamp5	Sst	Sncg	Lamp5	Pvalb	Sst	Sst	Lamp5-Lhx6	Vip	Lamp5	Sst	Sst	Lamp5-Lhx6	Sst	Vip	Lamp5	Pvalb	Vip	Vip	Sst	Lamp5-Lhx6	Pvalb	Pvalb
			SubType	Vip_2	Sst_1	Sst_0	Sst_5	Vip_2	Sst_4	Vip_2	Sst_5	Sst_0	Vip_7	Sncg_3	Sst_1	Lamp5_0	Sst_2	Pvalb_3	Sst_3	Vip_5	Lamp5_0	Pvalb_0	Pvalb_2	Sst_4	Vip_8	Vip_3	Lamp5_3	Sst_3	Sncg_2	Lamp5_0	Pvalb_2	Sst_4	Sst_4	Lamp5_LHX6_0	Vip_8	Lamp5_3	Sst_1	Sst_4	Lamp5_LHX6_0	Sst_2	Vip_7	Lamp5_0	Pvalb_5	Vip_8	Vip_0	Sst_0	Lamp5_LHX6_0	Pvalb_2	Pvalb_1
			MT	Vip	Sst	Sst	Sst	Vip	Sst	Vip	Sst	Sst	Vip	Sncg	Sst	Lamp5	Sst	Pvalb	Sst	Vip	Lamp5	Pvalb	Pvalb	Sst	Vip	Vip	Lamp5	Sst	Sncg	Lamp5	Pvalb	Sst	Sst	Lamp5	Vip	Lamp5	Sst	Sst	Lamp5	Sst	Vip	Lamp5	Pvalb	Vip	Vip	Sst	Lamp5	Pvalb	Pvalb
			MT#	11	12	12	12	11	12	11	12	12	11	10	12	9	12	13	12	11	9	13	13	12	11	11	9	12	10	9	13	12	12	9	11	9	12	12	9	12	11	9	13	11	11	12	9	13	13
			CellClass	Inhibitory/non-telencephalic neurons	Inhibitory/non-telencephalic neurons	Inhibitory/non-telencephalic neurons	Inhibitory/non-telencephalic neurons	Inhibitory/non-telencephalic neurons	Inhibitory/non-telencephalic neurons	Inhibitory/non-telencephalic neurons	Inhibitory/non-telencephalic neurons	Inhibitory/non-telencephalic neurons	Inhibitory/non-telencephalic neurons	Inhibitory/non-telencephalic neurons	Inhibitory/non-telencephalic neurons	Inhibitory/non-telencephalic neurons	Inhibitory/non-telencephalic neurons	Inhibitory/non-telencephalic neurons	Inhibitory/non-telencephalic neurons	Inhibitory/non-telencephalic neurons	Inhibitory/non-telencephalic neurons	Inhibitory/non-telencephalic neurons	Inhibitory/non-telencephalic neurons	Inhibitory/non-telencephalic neurons	Inhibitory/non-telencephalic neurons	Inhibitory/non-telencephalic neurons	Inhibitory/non-telencephalic neurons	Inhibitory/non-telencephalic neurons	Inhibitory/non-telencephalic neurons	Inhibitory/non-telencephalic neurons	Inhibitory/non-telencephalic neurons	Inhibitory/non-telencephalic neurons	Inhibitory/non-telencephalic neurons	Inhibitory/non-telencephalic neurons	Inhibitory/non-telencephalic neurons	Inhibitory/non-telencephalic neurons	Inhibitory/non-telencephalic neurons	Inhibitory/non-telencephalic neurons	Inhibitory/non-telencephalic neurons	Inhibitory/non-telencephalic neurons	Inhibitory/non-telencephalic neurons	Inhibitory/non-telencephalic neurons	Inhibitory/non-telencephalic neurons	Inhibitory/non-telencephalic neurons	Inhibitory/non-telencephalic neurons	Inhibitory/non-telencephalic neurons	Inhibitory/non-telencephalic neurons	Inhibitory/non-telencephalic neurons	Inhibitory/non-telencephalic neurons
			counts	885	829	869	984	871	949	976	906	803	1086	883	848	873	914	897	883	807	870	879	919	847	826	871	838	832	826	802	823	900	949	903	897	839	892	848	795	801	857	957	840	1177	809	842	795	779	847
			aveMe	0.60339	0.802171	0.72267	0.702236	0.621125	0.678609	0.631148	0.649007	0.723537	0.65884	0.537939	0.742925	0.63803	0.640044	0.753623	0.617214	0.717472	0.618391	0.656997	0.724157	0.755608	0.699354	0.703789	0.652745	0.658654	0.66707	0.65212	0.777643	0.688889	0.692308	0.632337	0.756968	0.605483	0.772422	0.744104	0.631447	0.674157	0.632439	0.637409	0.705952	0.679269	0.667491	0.735154	0.632075	0.69448	0.746163
fXCpGs	hg38		hg19	GSM6333549	GSM6333551	GSM6333553	GSM6333557	GSM6333559	GSM6333563	GSM6333569	GSM6333577	GSM6333585	GSM6333586	GSM6333614	GSM6333616	GSM6333624	GSM6333640	GSM6333642	GSM6333664	GSM6333671	GSM6333700	GSM6333701	GSM6333704	GSM6333795	GSM6333805	GSM6334022	GSM6334025	GSM6334044	GSM6334065	GSM6334072	GSM6334078	GSM6334086	GSM6334091	GSM6334162	GSM6334220	GSM6334239	GSM6334242	GSM6334254	GSM6334255	GSM6334266	GSM6334418	GSM6334443	GSM6334450	GSM6334480	GSM6334486	GSM6334488	GSM6334527	GSM6334577	GSM6334847
chrX	114470309	114470310	113704762										0																									0
chrX	155641551	155641552	154871212									0			1								1											0				1		0	1			0
chrX	155641611	155641612	154871272									0											1											1				1		1	1
chrX	155641614	155641615	154871275									0											1											1				1		0	1
chrX	155641607	155641608	154871268									0											1											1				1		1	1
chrX	155641532	155641533	154871193									0			1								1															1			1			0
chrX	155641719	155641720	154871380			1							0									1	1			0									0		0			1				0
chrX	62504104	62504105	61723574
chrX	100137679	100137680	99392677															0						0														1							0
chrX	62885792	62885793	62105262																																									1
chrX	74805056	74805057	74024891																							1												1
chrX	103566501	103566502	102821429																			1		0													0					1
chrX	58209983	58209984	58236417																						1
chrX	67850727	67850728	67070569																										0	0
chrX	71423273	71423274	70643123																		0																	1
chrX	55603938	55603939	55630371																														1											1			0	1
chrX	133984244	133984245	133118271
chrX	58238065	58238066	58264499
chrX	12432610	12432611	12450729																																								1
chrX	33133808	33133809	33151925											0
chrX	55292785	55292786	55319218																				0
chrX	55292887	55292888	55319320																				0
chrX	56208906	56208907	56235339																																		1					1			1
chrX	57814429	57814430	57840862
chrX	58121044	58121045	58147478																								0																	1
chrX	58183034	58183035	58209468
chrX	58207878	58207879	58234312											1																			1
chrX	64626403	64626404	63846283
chrX	130920489	130920490	130054463																							0																							1
chrX	41919810	41919811	41779063
chrX	45435928	45435929	45295173																																									1		1
chrX	57816900	57816901	57843333
chrX	58043467	58043468	58069901					1	0
chrX	58120663	58120664	58147097																																		1
chrX	63103255	63103256	62322725											1															0		1																		0
chrX	106863242	106863243	106106472
chrX	118345341	118345342	117479304												0										0
chrX	130434222	130434223	129568196													0														0
chrX	11760162	11760163	11778281
chrX	14386885	14386886	14405007																				0						1
chrX	15674243	15674244	15692366																																0												1	1
chrX	16946224	16946225	16964347																																				1				1
chrX	27884817	27884818	27902934																																		1								1
chrX	43349637	43349638	43208886				0
chrX	49230239	49230240	49086701									1																	1										0
chrX	53000537	53000538	53029716																1
chrX	56935772	56935773	56962205																															0
chrX	57816240	57816241	57842673	0																																								1
chrX	58087083	58087084	58113517							1		0																																		1
chrX	58106131	58106132	58132565										1							0		1		1
chrX	58177503	58177504	58203937																								0
chrX	58300321	58300322	58326754													1					1										1							1
chrX	58343734	58343735	58370167																		0		0				0								0											0
chrX	58381287	58381288	58407720																			1												0		0
chrX	58422951	58422952	58449384																																			1										1
chrX	58424936	58424937	58451369								1
chrX	58513305	58513306	58539738															0																			1				0						1
chrX	63767236	63767237	62987116										1									1																										0
chrX	67192080	67192081	66411922												1
chrX	67543501	67543502	66763343					1																						1
chrX	71053396	71053397	70273246																																			0
chrX	73128301	73128302	72348140	0																1		0
chrX	108391512	108391513	107634742
chrX	116198863	116198864	115330116											1									1																										1
chrX	127269016	127269017	126402999								1																																						1
chrX	129566119	129566120	128700096		1
chrX	135336466	135336467	134470391															1
chrX	7927009	7927010	7895050																0									1
chrX	8783259	8783260	8751300																0						0																								1
chrX	19542110	19542111	19560228
chrX	28716141	28716142	28734258						0																																						0
chrX	38664656	38664657	38523910																																														0
chrX	48581970	48581971	48440358			0
chrX	55814167	55814168	55840600																																													0
chrX	56674279	56674280	56700712															1
chrX	56947582	56947583	56974015					0																					0
chrX	58227952	58227953	58254386												1		1									1
chrX	58233945	58233946	58260379					0																																									1
chrX	58237111	58237112	58263545
chrX	62466047	62466048	61685517																																					1
chrX	62467084	62467085	61686554
chrX	62504300	62504301	61723770					0		1										1			0															1						0
chrX	62542473	62542474	61761943				1																												1		1
chrX	62714414	62714415	61933884																			1																1
chrX	62859529	62859530	62078999																																														1
chrX	64476048	64476049	63695928								1			0
chrX	64487455	64487456	63707335		1
chrX	64894664	64894665	64114544
chrX	66313477	66313478	65533319
chrX	66398716	66398717	65618558
chrX	69429753	69429754	68649596									0																			1
chrX	73423438	73423439	72643274																																		1
chrX	76577662	76577663	75798054
chrX	82894502	82894503	82149510		1	1
chrX	87708800	87708801	86963800																																													0
chrX	127048314	127048315	126182297												1
chrX	7594966	7594967	7513007				1
chrX	7927053	7927054	7895094								1								0				1					1
chrX	7927059	7927060	7895100								1								0				1					1
chrX	14030661	14030662	14048780										1
chrX	15336956	15336957	15355078					1
chrX	19908775	19908776	19926893														1																		1
chrX	24648097	24648098	24666214					1																					1									1
chrX	24839459	24839460	24857576						0
chrX	28644497	28644498	28662614
chrX	34652220	34652221	34670337																																								1
chrX	37919148	37919149	37778401																0																	0
chrX	46910384	46910385	46769819						1										1
chrX	48477257	48477258	48335645
chrX	54870812	54870813	54897245																																1									0
chrX	55376125	55376126	55402558											0																																		1
chrX	55422716	55422717	55449149
chrX	55628532	55628533	55654965																														1													1
chrX	55697053	55697054	55723486				0																									1											0
chrX	56508284	56508285	56534717					0						1																								0
chrX	56890909	56890910	56917342				1		1													1
chrX	57547707	57547708	57574140
chrX	58015710	58015711	58042144																										1														1
chrX	58042331	58042332	58068765
chrX	58043415	58043416	58069849					1	1					1
chrX	58227857	58227858	58254291																							0							0
chrX	62757213	62757214	61976683											1								0
chrX	62888187	62888188	62107657														0							1
chrX	62961881	62961882	62181351
chrX	65451795	65451796	64671675												1													1		0											1
chrX	66287906	66287907	65507748										1																					0
chrX	66553025	66553026	65772867
chrX	66565992	66565993	65785834								1
chrX	72255955	72255956	71475805	0						1									1													0
chrX	77160509	77160510	76380971													0
chrX	78591656	78591657	77847153																							0
chrX	81401848	81401849	80657347																													1
chrX	101317870	101317871	100572858				0	0
chrX	104423934	104423935	103668615																1									1
chrX	111849558	111849559	111092786												1												0
chrX	112163031	112163032	111406259																								0																				0
chrX	112679644	112679645	111922872											1																				1
chrX	122363284	122363285	121497137																																							1
chrX	130906074	130906075	130040048
chrX	140439857	140439858	139522022																			1
chrX	152658488	152658489	151826953
chrX	155086623	155086624	154314898																1			1											1
chrX	5896783	5896784	5814824
chrX	11769959	11769960	11788078																0		0			1							1	0
chrX	12325538	12325539	12343657																																					1
chrX	12373751	12373752	12391870																																										1
chrX	13732452	13732453	13750571
chrX	16440889	16440890	16459012																																	1
chrX	21053894	21053895	21072012																																											1
chrX	21953220	21953221	21971338																												1
chrX	23841318	23841319	23859435																																									1
chrX	24392839	24392840	24410956																1
chrX	24692579	24692580	24710696	1				0																		1										0												0
chrX	27308267	27308268	27326384											0										1
chrX	36963344	36963345	36981417																						0
chrX	36963353	36963354	36981426										0												1
chrX	37711269	37711270	37570522														0										0												0										0
chrX	48699017	48699018	48557408
chrX	48699047	48699048	48557438
chrX	49116118	49116119	48972472										1																											1
chrX	49171145	49171146	49027496										0																			1	1						1	0
chrX	49760677	49760678	49525280																								1
chrX	55352708	55352709	55379141																																									1
chrX	55443713	55443714	55470146																																				0								1
chrX	55660411	55660412	55686844																1							1
chrX	55702713	55702714	55729146							0							1											1
chrX	55716055	55716056	55742488
chrX	57753806	57753807	57780239
chrX	58040342	58040343	58066776																											0																			0
chrX	58124368	58124369	58150802
chrX	58139329	58139330	58165763												1			0																				0
chrX	58139768	58139769	58166202																												0
chrX	58198767	58198768	58225201											1
chrX	58291860	58291861	58318293																														1														0
chrX	58386036	58386037	58412469		1
chrX	58417763	58417764	58444196
chrX	62521408	62521409	61740878																														0
chrX	62864750	62864751	62084220												1																	0
chrX	62889127	62889128	62108597																																											0
chrX	62973254	62973255	62192724	1									0							1					1
chrX	63093863	63093864	62313333	1																																						0
chrX	64018614	64018615	63238494																					1
chrX	64704828	64704829	63924708													0
chrX	66280355	66280356	65500197																							1
chrX	66365833	66365834	65585675						0																								0
chrX	71170789	71170790	70390639										0	0																											1						0
chrX	72571757	72571758	71791607
chrX	74705471	74705472	73925306																																											1
chrX	75155314	75155315	74375149																											0
chrX	76521182	76521183	75741594									1																		0
chrX	76682389	76682390	75902783			1
chrX	77347707	77347708	76568170																						1
chrX	79366143	79366144	78621640
chrX	81735278	81735279	80990777
chrX	87073845	87073846	86328848											1																			0
chrX	93299941	93299942	92554940
chrX	100366514	100366515	99621512
chrX	101415468	101415469	100670456				0						0																																				1
chrX	104252892	104252893	103497573					1																													1
chrX	104288828	104288829	103533509		0																																1
chrX	108733235	108733236	107976465																																				1						1
chrX	119994824	119994825	119128787
chrX	119994883	119994884	119128846																																						1
chrX	121228152	121228153	120362006											0
chrX	126305448	126305449	125439431																																		0										0
chrX	126552305	126552306	125686288																					1																0
chrX	143058065	143058066	142145851		0											1							1																					1
chrX	147330803	147330804	146412321																					1				1
chrX	151176838	151176839	150345310																							1
chrX	151177041	151177042	150345513				0																											1
chrX	3526349	3526350	3444390				1													1
chrX	7347785	7347786	7265826
chrX	8783049	8783050	8751090																			0
chrX	11970879	11970880	11988998																	0		1													0										0
chrX	13569431	13569432	13587550																																					1	1
chrX	17361827	17361828	17379950						0																				0
chrX	20336651	20336652	20354769																								1
chrX	25083850	25083851	25101967															1																	1						1
chrX	27186768	27186769	27204885															1
chrX	31234364	31234365	31252481																0
chrX	41917209	41917210	41776462																				1
chrX	42818422	42818423	42677673															0																													0
chrX	48827653	48827654	48686063		1																						1						1
chrX	54969433	54969434	54995866																					1
chrX	55234959	55234960	55261392																													1
chrX	55621870	55621871	55648303		0													1					1							1				0
chrX	56358282	56358283	56384715
chrX	56642559	56642560	56668992							1															0
chrX	58091036	58091037	58117470				1																									0
chrX	58107316	58107317	58133750										1
chrX	58124789	58124790	58151223
chrX	58126782	58126783	58153216																0																			1
chrX	58191274	58191275	58217708													0			0
chrX	58191571	58191572	58218005						0												0															0
chrX	58216454	58216455	58242888																																										1
chrX	58220778	58220779	58247212																	1
chrX	58228684	58228685	58255118																0																						0		0
chrX	58291890	58291891	58318323																														1
chrX	58344931	58344932	58371364																																					1				1				1
chrX	58453656	58453657	58480089	1																													0						1
chrX	62463206	62463207	61682676				1						1												0																	1		1
chrX	63046298	63046299	62265768
chrX	63055924	63055925	62275394										0																							1	1
chrX	64666355	64666356	63886235		1																													0
chrX	64879184	64879185	64099064																																												0
chrX	66222435	66222436	65442277		0																			0
chrX	66423594	66423595	65643436						1																																	1
chrX	67547198	67547199	66767040												0	1
chrX	76841003	76841004	76061428	0										1
chrX	95340294	95340295	94595293					1														1
chrX	99940117	99940118	99195115																					1													0							1
chrX	106397292	106397293	105640522							1																																		1
chrX	106894883	106894884	106138113												1																																1
chrX	108709866	108709867	107953096													1																															1
chrX	113585355	113585356	112828642	0
chrX	116087805	116087806	115219058																							0	0
chrX	119993186	119993187	119127149			0
chrX	119994894	119994895	119128857																																						1
chrX	120575878	120575879	119709733																																							0
chrX	130118672	130118673	129252647		1
chrX	136489086	136489087	135571245
chrX	138191819	138191820	137273978
chrX	149437843	149437844	148519374									1
chrX	149800506	149800507	148882168			1
chrX	152500028	152500029	151668500																			0										1	1
chrX	152637418	152637419	151805872		0																	0																		0				1
chrX	155267035	155267036	154496320						0																																					1
chrX	12309871	12309872	12327990
chrX	13652405	13652406	13670524
chrX	15737632	15737633	15755755	1		0									0					1						1
chrX	17072936	17072937	17091059																																							1
chrX	18368887	18368888	18387007						1
chrX	21802482	21802483	21820600																							0										1				0
chrX	23906876	23906877	23924993																														1
chrX	30468763	30468764	30486880
chrX	38125560	38125561	37984813																			1
chrX	42531567	42531568	42390819
chrX	47645050	47645051	47504449																																				0
chrX	47835672	47835673	47695071														0		0
chrX	48473525	48473526	48331913									1
chrX	49219863	49219864	49076322														1
chrX	54680356	54680357	54706789															1															1
chrX	58002555	58002556	58028989											1																							1
chrX	58034883	58034884	58061317
chrX	58128794	58128795	58155228
chrX	58148663	58148664	58175097			1				1				0												0																		1
chrX	58150368	58150369	58176802																															1												1
chrX	58156272	58156273	58182706																														1
chrX	58175961	58175962	58202395												0							0
chrX	58192113	58192114	58218547
chrX	58194063	58194064	58220497																																					1
chrX	58209377	58209378	58235811						1
chrX	58213939	58213940	58240373															0											1							1
chrX	58277396	58277397	58303830											0
chrX	58360601	58360602	58387034														1
chrX	58425697	58425698	58452130														0
chrX	62755157	62755158	61974627															1					0													1
chrX	62879909	62879910	62099379															1				1
chrX	62923170	62923171	62142640																													1										0					0
chrX	62944000	62944001	62163470
chrX	63018150	63018151	62237620
chrX	64666535	64666536	63886415									1
chrX	64809033	64809034	64028913														0
chrX	66420438	66420439	65640280
chrX	68428598	68428599	67648440
chrX	70290900	70290901	69510750																				1
chrX	70661269	70661270	69881119																								0
chrX	73187743	73187744	72407579					0													0													0
chrX	76358770	76358771	75579169															1																															1
chrX	77192582	77192583	76413045																															0												1			1
chrX	77223803	77223804	76444266								1																						1								1					1
chrX	77740853	77740854	76996332
chrX	77896377	77896378	77151874						1																																	1
chrX	94831925	94831926	94086924
chrX	111189514	111189515	110432742
chrX	111519434	111519435	110762662																							0
chrX	117081858	117081859	116215826																																						0
chrX	119570625	119570626	118704588
chrX	119588592	119588593	118722555																										1		0
chrX	119617583	119617584	118751546									1																		0								0
chrX	119993531	119993532	119127494													0
chrX	119994902	119994903	119128865																																						0
chrX	122300980	122300981	121434833																															1
chrX	123272233	123272234	122406084										1	1																						0								1
chrX	123486549	123486550	122620400													1
chrX	126676918	126676919	125810901								0
chrX	129739432	129739433	128873408																													1														1
chrX	134543380	134543381	133677410			1																													1
chrX	136162897	136162898	135245056
chrX	137646912	137646913	136729071
chrX	139961297	139961298	139043456																			1
chrX	153032492	153032493	152200838						0																															1
chrX	154505965	154505966	153734296															1
chrX	155217766	155217767	154446043																									0				1										0
chrX	9420955	9420956	9388995	1																				1													0
chrX	11215315	11215316	11233435
chrX	12974064	12974065	12992183
chrX	17086002	17086003	17104125																	1
chrX	21656501	21656502	21674619								0																					1
chrX	34566166	34566167	34584283																				1									0				1
chrX	36986574	36986575	37004647											1													0
chrX	41270762	41270763	41130015
chrX	48904414	48904415	48761691											0
chrX	48912571	48912572	48769848																																				1
chrX	49225964	49225965	49082426
chrX	50530739	50530740	50273739																						0																					0
chrX	51494294	51494295	51237146
chrX	51867525	51867526	51610621															1												1						1						1
chrX	51899037	51899038	51642133																				1
chrX	53528808	53528809	53555772													1										1																					0
chrX	55449095	55449096	55475528																														0
chrX	55671426	55671427	55697859																																									1
chrX	56912671	56912672	56939104																		1											1
chrX	56913826	56913827	56940259									0														1																							0
chrX	57498483	57498484	57524916																																				1
chrX	57842329	57842330	57868762																							0												1									0
chrX	58064675	58064676	58091109
chrX	58080655	58080656	58107089																						1		1							1	1
chrX	58081369	58081370	58107803
chrX	58106519	58106520	58132953																																		1
chrX	58122369	58122370	58148803																																											1
chrX	58122439	58122440	58148873								1																																			1
chrX	58125641	58125642	58152075																	1
chrX	58160933	58160934	58187367																																		1
chrX	58210646	58210647	58237080
chrX	58238450	58238451	58264884																							0
chrX	58339810	58339811	58366243																																			0			1				0
chrX	58382613	58382614	58409046																																											0
chrX	58414378	58414379	58440811																				0
chrX	58418142	58418143	58444575																																													1
chrX	58440376	58440377	58466809										1		1
chrX	62541771	62541772	61761241																																				1
chrX	62711936	62711937	61931406																					1													1
chrX	62837249	62837250	62056719																																1
chrX	62870657	62870658	62090127									0			0																															1
chrX	65620251	65620252	64840130						0		0	0														1
chrX	66692644	66692645	65912486																									0
chrX	70969885	70969886	70189735
chrX	71878800	71878801	71098650																											0							1
chrX	73447396	73447397	72667232
chrX	73511415	73511416	72731251
chrX	73511423	73511424	72731259
chrX	75706199	75706200	74926034							1			0
chrX	78106338	78106339	77361835																																										1
chrX	81878456	81878457	81133955																	1
chrX	85994333	85994334	85249337																	0
chrX	101264028	101264029	100519017								1			1										1																			1
chrX	101392380	101392381	100647368
chrX	104607288	104607289	103851969																																		0
chrX	106354007	106354008	105597236
chrX	108001660	108001661	107244890																																			1						1
chrX	112883725	112883726	112126953												1
chrX	117646732	117646733	116780695																															0
chrX	119994645	119994646	119128608					0																					0
chrX	129572604	129572605	128706581			1																						1					1
chrX	129852841	129852842	128986817	0																																										1
chrX	146596585	146596586	145678103																										0
chrX	149471569	149471570	148553100																																		0
chrX	154303837	154303838	153532189																																										1			1
chrX	154410827	154410828	153639163
chrX	154751642	154751643	153979917
chrX	155094749	155094750	154323024											1																											1
chrX	3781334	3781335	3699375																						1
chrX	6059379	6059380	5977420																																										0
chrX	6200304	6200305	6118345												1							1
chrX	7636143	7636144	7554184																																			1
chrX	9885493	9885494	9853533																0
chrX	10174885	10174886	10142925
chrX	10755605	10755606	10723645																																								1	1
chrX	15956818	15956819	15974941																																														0
chrX	18676583	18676584	18694703																																									0
chrX	21604304	21604305	21622422																												1							1
chrX	24053853	24053854	24071970
chrX	24294698	24294699	24312815																													1						0
chrX	25382677	25382678	25400794																								0
chrX	26906252	26906253	26924369						0																							0
chrX	29468996	29468997	29487113																									1
chrX	38055079	38055080	37914332
chrX	40092350	40092351	39951603											0
chrX	45057044	45057045	44916289																																1											0
chrX	48561578	48561579	48419966																	1																									1
chrX	48736292	48736293	48594696																	1										0
chrX	48738188	48738189	48596595												0																											1
chrX	48819612	48819613	48678019																					1
chrX	48938714	48938715	48795985																															0
chrX	49213741	49213742	49070201						1									1			0																						1
chrX	49230175	49230176	49086637																																				0
chrX	53356339	53356340	53383262																							0
chrX	54478833	54478834	54505266																																1			1
chrX	55608883	55608884	55635316
chrX	56685220	56685221	56711653																														0
chrX	56734164	56734165	56760597
chrX	57163395	57163396	57189828			1
chrX	57346487	57346488	57372920
chrX	57583030	57583031	57609463																															0
chrX	57832839	57832840	57859272
chrX	58027119	58027120	58053553																1						0
chrX	58054386	58054387	58080820		1														0									1
chrX	58080603	58080604	58107037																						1		1								0
chrX	58084712	58084713	58111146				0
chrX	58103753	58103754	58130187								0
chrX	58146684	58146685	58173118					1																										1
chrX	58190238	58190239	58216672																1			0						1		1											1
chrX	58198041	58198042	58224475
chrX	58237683	58237684	58264117		1
chrX	58241412	58241413	58267846																			0				0																			0			1
chrX	58279581	58279582	58306015
chrX	58373448	58373449	58399881																					1							0									1
chrX	62499992	62499993	61719462
chrX	62517442	62517443	61736912																																													1
chrX	62519294	62519295	61738764		1
chrX	62869862	62869863	62089332														1																													1
chrX	62980044	62980045	62199514		1																										1							0	0							1
chrX	63069022	63069023	62288492
chrX	63098010	63098011	62317480																																				1
chrX	64018571	64018572	63238451
chrX	65408568	65408569	64628448																		1
chrX	65408730	65408731	64628610																		1																						1
chrX	65537601	65537602	64757481																									0
chrX	69535316	69535317	68755159
chrX	70085473	70085474	69305323											1															1	1
chrX	70265037	70265038	69484887																					1
chrX	73447343	73447344	72667179
chrX	73449603	73449604	72669439																					1										1
chrX	73727364	73727365	72947199							1																					1
chrX	75232296	75232297	74452131										1
chrX	77331262	77331263	76551725
chrX	85427577	85427578	84682582				1
chrX	92721341	92721342	91976340
chrX	94730516	94730517	93985515
chrX	101171989	101171990	100426978														1
chrX	102084813	102084814	101339785
chrX	104155908	104155909	103400589										1																																			1
chrX	104581150	104581151	103825831								1
chrX	110409158	110409159	109652386																		1
chrX	111140065	111140066	110383293						1
chrX	111221608	111221609	110464836									0
chrX	111308375	111308376	110551603												0
chrX	111407340	111407341	110650568											0																							0	0
chrX	113585374	113585375	112828661	1
chrX	118115381	118115382	117249344
chrX	119273166	119273167	118407129											0					0									0
chrX	119694158	119694159	118828121													0
chrX	123283532	123283533	122417383						0																													0
chrX	123977614	123977615	123111464											0	1																															1
chrX	123986757	123986758	123120607																				1
chrX	129655377	129655378	128789354																												1
chrX	130297073	130297074	129431047																											1
chrX	130339332	130339333	129473306								1			0								0								0					1														1
chrX	130959252	130959253	130093226																			0													1
chrX	130976579	130976580	130110553
chrX	131579151	131579152	130713125																		1
chrX	134795905	134795906	133929935																															0
chrX	135972301	135972302	135054460																1											1										0
chrX	136877727	136877728	135959886																																			1
chrX	140289783	140289784	139371948																									0							1
chrX	147921850	147921851	147003368
chrX	148806365	148806366	147887889
chrX	152489813	152489814	151658285										0		0					1
chrX	152942289	152942290	152110833	0																																						0
chrX	3076646	3076647	2994687																																								0					0
chrX	6279950	6279951	6197991
chrX	7287102	7287103	7205143													0
chrX	14033232	14033233	14051351													0									1
chrX	17721822	17721823	17739942
chrX	17841679	17841680	17859799														0
chrX	21039661	21039662	21057779									0
chrX	21657878	21657879	21675996							1																																							1
chrX	23643763	23643764	23661880
chrX	24270029	24270030	24288146
chrX	24294747	24294748	24312864								0																											0
chrX	24347705	24347706	24365822
chrX	24392971	24392972	24411088																											0												0
chrX	27863992	27863993	27882109																																											1
chrX	30560921	30560922	30579038								1									1
chrX	31083006	31083007	31101123																																		0
chrX	36019128	36019129	36037245																			1
chrX	39089092	39089093	38948345												1																	1
chrX	43940961	43940962	43800207																				1											1												1
chrX	47687264	47687265	47546663														1	1											1
chrX	50471997	50471998	50214997
chrX	50876544	50876545	50619544													1																							1
chrX	52550728	52550729	52579740		1																					0
chrX	53000864	53000865	53030043			1	1
chrX	53080492	53080493	53109674					1			1
chrX	53351969	53351970	53378878
chrX	54902903	54902904	54929336						1																											1
chrX	55483823	55483824	55510256
chrX	56459299	56459300	56485732																																											1
chrX	56890592	56890593	56917025																																								1
chrX	56905203	56905204	56931636																											1
chrX	56912255	56912256	56938688	0
chrX	57721539	57721540	57747972																									1									1					0
chrX	57956968	57956969	57983402																		1
chrX	57998595	57998596	58025029																	1						1											0		1
chrX	58049177	58049178	58075611					0																																					1
chrX	58103775	58103776	58130209
chrX	58149506	58149507	58175940															1
chrX	58162997	58162998	58189431
chrX	58176156	58176157	58202590																																										1
chrX	58188378	58188379	58214812																						0
chrX	58367292	58367293	58393725																													0
chrX	58397215	58397216	58423648	1
chrX	58414239	58414240	58440672
chrX	58414985	58414986	58441418					0																							1
chrX	62517453	62517454	61736923																																													1
chrX	62682064	62682065	61901534
chrX	62714802	62714803	61934272										1
chrX	62721552	62721553	61941022
chrX	62850751	62850752	62070221																												1
chrX	62885398	62885399	62104868																			1							0															0
chrX	63350009	63350010	62569888		1																								1																	1
chrX	63873000	63873001	63092880
chrX	70501284	70501285	69721134																																					1
chrX	71128655	71128656	70348505
chrX	72274752	72274753	71494602
chrX	73128382	73128383	72348221																																											1
chrX	73447322	73447323	72667158
chrX	73447505	73447506	72667341														0																											0
chrX	76522128	76522129	75742540																															1
chrX	76558364	76558365	75778772
chrX	76627595	76627596	75848004													0
chrX	77347823	77347824	76568286																							1
chrX	78928334	78928335	78183831
chrX	79413535	79413536	78669032															1
chrX	80334954	80334955	79590453																																									1
chrX	82709032	82709033	81964481						1		1								1													1																	1
chrX	83503950	83503951	82758958				1																													0
chrX	89557314	89557315	88812313																		1	1
chrX	91771296	91771297	91026295
chrX	101569692	101569693	100824667																					0
chrX	102770187	102770188	102025115
chrX	107155904	107155905	106399134
chrX	108268584	108268585	107511814																																	0
chrX	108437390	108437391	107680620																		1
chrX	113380894	113380895	112624121																																						0
chrX	115312074	115312075	114546641
chrX	118286534	118286535	117420497																							1
chrX	118383314	118383315	117517277											0										1																						1
chrX	118474734	118474735	117608697
chrX	118823189	118823190	117957152
chrX	119989753	119989754	119123716
chrX	120598924	120598925	119732779																									1
chrX	123963838	123963839	123097688																																						1
chrX	125556641	125556642	124690490								1									1																						1
chrX	129739093	129739094	128873069								1													1						1
chrX	129925335	129925336	129059311
chrX	130563395	130563396	129697369			0													0
chrX	131084917	131084918	130218891
chrX	134533205	134533206	133667235												1
chrX	134990635	134990636	134124665																												1
chrX	135920784	135920785	135002943
chrX	136499023	136499024	135581182																																	0
chrX	136499356	136499357	135581515																																	0
chrX	138716015	138716016	137798177				0																															1	0									1
chrX	139202367	139202368	138284529																				0
chrX	140141799	140141800	139223958						1		1
chrX	141183456	141183457	140277633														1														1
chrX	142601658	142601659	141689444								1
chrX	143857596	143857597	142940690																													1
chrX	149377123	149377124	148458653																											0		1
chrX	150293390	150293391	149461623							0											0										1																0
chrX	155217739	155217740	154446016																									0				1										1
chrX	6279931	6279932	6197972
chrX	9240053	9240054	9208093							1								1					1			0
chrX	12354580	12354581	12372699
chrX	13654089	13654090	13672208											1
chrX	14872184	14872185	14890306																										0
chrX	15628275	15628276	15646398																																			1
chrX	15852403	15852404	15870526
chrX	17606977	17606978	17625097
chrX	18628716	18628717	18646836
chrX	19513988	19513989	19532106																																			0
chrX	21656131	21656132	21674249																													1				1
chrX	21656213	21656214	21674331																			1														0
chrX	24015050	24015051	24033167
chrX	24692475	24692476	24710592					0																																									1
chrX	26876933	26876934	26895050
chrX	44253367	44253368	44112613			0																																									0
chrX	46380748	46380749	46240183																										1
chrX	50467866	50467867	50210865
chrX	50988341	50988342	50731341	1																								0																			1
chrX	51809304	51809305	51552400	1																																							0
chrX	56715297	56715298	56741730							1
chrX	57810801	57810802	57837234
chrX	58048117	58048118	58074551																																										1				1
chrX	58103895	58103896	58130329																																0
chrX	58113722	58113723	58140156																						0
chrX	58136308	58136309	58162742										0
chrX	58140397	58140398	58166831																											1	1												0
chrX	58153280	58153281	58179714
chrX	58162812	58162813	58189246																																														1
chrX	58173899	58173900	58200333	0																						1
chrX	58227011	58227012	58253445		1			1
chrX	58246012	58246013	58272446
chrX	58249585	58249586	58276019																																		0		0					0				1
chrX	62560404	62560405	61779874																													1
chrX	62918204	62918205	62137674																								0
chrX	63019015	63019016	62238485						1
chrX	64230322	64230323	63450202																														1		1
chrX	66285621	66285622	65505463								0
chrX	71053278	71053279	70273128
chrX	73231849	73231850	72451685
chrX	73562337	73562338	72782173														0
chrX	77223190	77223191	76443653																																														1
chrX	78913335	78913336	78168832
chrX	79252429	79252430	78507926																					1
chrX	81980227	81980228	81235676																																					0
chrX	85427607	85427608	84682612				0
chrX	91664146	91664147	90919145
chrX	94543315	94543316	93798314																						0	1									1						0					0
chrX	95057208	95057209	94312207																																							0
chrX	96001263	96001264	95256262										1
chrX	97594779	97594780	96849778					1
chrX	102341895	102341896	101596818								1																										1										0
chrX	102659550	102659551	101914478																																												0		0
chrX	106493874	106493875	105737104																															0					1
chrX	108442914	108442915	107686144																															1
chrX	109337567	109337568	108580796							0
chrX	115331074	115331075	114565659
chrX	119669713	119669714	118803676
chrX	119982186	119982187	119116149	1																																				1						1
chrX	120857361	120857362	119991215										0																															0
chrX	123581904	123581905	122715755																				0
chrX	128246369	128246370	127380346																																			1							0
chrX	131887491	131887492	131021519
chrX	132975325	132975326	132109353						1																																							1
chrX	134426402	134426403	133560432					1
chrX	134753869	134753870	133887899		1
chrX	135683635	135683636	134817350																			1
chrX	136526314	136526315	135608473
chrX	146211044	146211045	145292562			0
chrX	154741228	154741229	153969503	1				0
chrX	5717435	5717436	5635476								1										0																									0
chrX	5959363	5959364	5877404																							0									0							1
chrX	11724315	11724316	11742435
chrX	16713310	16713311	16731433
chrX	16867419	16867420	16885542												1
chrX	17606882	17606883	17625002
chrX	20118737	20118738	20136855				1													1
chrX	21655987	21655988	21674105															1												1		1			1
chrX	21656771	21656772	21674889					0			1																													1
chrX	36984566	36984567	37002639
chrX	39697395	39697396	39556649																				1
chrX	39814597	39814598	39673851																																0
chrX	41341331	41341332	41200584											1																																		1
chrX	43191330	43191331	43050579
chrX	44036565	44036566	43895811																						0
chrX	45233676	45233677	45092921																																					1
chrX	47754357	47754358	47613756		1			1
chrX	48728369	48728370	48586774
chrX	54640262	54640263	54666695																																							1
chrX	55206571	55206572	55233004													0				1
chrX	56452858	56452859	56479291																																	0
chrX	56880308	56880309	56906741																				1														1							1		0
chrX	57583373	57583374	57609806																																1
chrX	57870985	57870986	57897419																																											1
chrX	58035811	58035812	58062245											0													0															0
chrX	58216071	58216072	58242505						1																			1													0
chrX	58290194	58290195	58316627																				1		0																			1
chrX	58355163	58355164	58381596		1													0
chrX	58510634	58510635	58537067									1																														1
chrX	62862446	62862447	62081916							1																						1																0
chrX	62867835	62867836	62087305	0
chrX	62887926	62887927	62107396				0																	1													1
chrX	65542557	65542558	64762437									1
chrX	65891850	65891851	65111692			1														0											0
chrX	66577498	66577499	65797340																					0										0
chrX	67547065	67547066	66766907																1																0							1
chrX	77285501	77285502	76505964																															0							0
chrX	78048379	78048380	77303876		0
chrX	79315250	79315251	78570747
chrX	85109413	85109414	84364419											1																																1
chrX	94921043	94921044	94176042																																			1
chrX	100732551	100732552	99987538
chrX	103220820	103220821	102475748				0
chrX	103348134	103348135	102603062																																									1
chrX	103348212	103348213	102603140																	1
chrX	104162436	104162437	103407117												1											0
chrX	104241459	104241460	103486140																																		1
chrX	104910242	104910243	104154923						0
chrX	106179528	106179529	105423521																	0
chrX	110082568	110082569	109325796														1			1																											0
chrX	112038436	112038437	111281664																																			1
chrX	119942453	119942454	119076416																					1					0										1
chrX	120001860	120001861	119135817																												1
chrX	120016885	120016886	119150842																																			1								0
chrX	122103441	122103442	121237294
chrX	123101242	123101243	122235095
chrX	126552218	126552219	125686201																					0							1
chrX	129937208	129937209	129071184
chrX	129956692	129956693	129090668								1
chrX	130121470	130121471	129255445				1
chrX	131314387	131314388	130448361																															1			1		1			1					1
chrX	134753874	134753875	133887904		1
chrX	134795985	134795986	133930015																															1
chrX	136489042	136489043	135571201																							1
chrX	136954849	136954850	136037008										1																															1
chrX	146824516	146824517	145906034																					1
chrX	148915609	148915610	147997139			1																																											0
chrX	151184116	151184117	150352588
chrX	154763944	154763945	153992219							0																																	0
chrX	6280018	6280019	6198059																									0
chrX	7198897	7198898	7116938																										1
chrX	7996447	7996448	7964488
chrX	20518034	20518035	20536152																			1
chrX	24053612	24053613	24071729														0									1		1										1
chrX	31416892	31416893	31435009																																												1
chrX	40076456	40076457	39935709																							1
chrX	40539363	40539364	40398615		1																												1
chrX	47185537	47185538	47044936										1									1
chrX	47191961	47191962	47051360
chrX	49234030	49234031	49090489																				0										0
chrX	51262538	51262539	51005401
chrX	51334220	51334221	51077072
chrX	51461686	51461687	51204538
chrX	52081431	52081432	51824527																																											0
chrX	55406849	55406850	55433282																						1
chrX	55450603	55450604	55477036							0
chrX	56996310	56996311	57022743		0											1
chrX	57956850	57956851	57983284																					1			1
chrX	58112644	58112645	58139078
chrX	58150018	58150019	58176452								1			0
chrX	58189264	58189265	58215698					0											0					0
chrX	58296011	58296012	58322444																			1		0				1
chrX	62487887	62487888	61707357																									1		1
chrX	62861714	62861715	62081184																																			1
chrX	63046621	63046622	62266091
chrX	63098839	63098840	62318309																																				0
chrX	63314510	63314511	62534389
chrX	63562178	63562179	62782058
chrX	65300699	65300700	64520579																																								1
chrX	73449478	73449479	72669314		1
chrX	77896329	77896330	77151826						1
chrX	78230507	78230508	77486004
chrX	79152305	79152306	78407802
chrX	84803293	84803294	84058300		1													1
chrX	85991863	85991864	85246867																															0
chrX	86048372	86048373	85303376
chrX	92808149	92808150	92063148
chrX	100863649	100863650	100118638
chrX	107659564	107659565	106902794										1					1					1								1
chrX	112834836	112834837	112078064
chrX	118024802	118024803	117158765
chrX	120016919	120016920	119150876																																			1								1
chrX	136878471	136878472	135960630																				1																										1
chrX	138610431	138610432	137692592	1
chrX	145190504	145190505	144272024																	1										1
chrX	154763933	154763934	153992208							0																																	1
chrX	4810315	4810316	4728356														1		0
chrX	15310551	15310552	15328673	0														0											1								1
chrX	24464367	24464368	24482484							1
chrX	40083248	40083249	39942501													1
chrX	47390717	47390718	47250116							0																	0
chrX	50464139	50464140	50207138
chrX	52992637	52992638	53021817					0							0					1																					1
chrX	55431075	55431076	55457508																																			0											0
chrX	55602005	55602006	55628438
chrX	56618827	56618828	56645260					1
chrX	57468343	57468344	57494776																			1
chrX	57804816	57804817	57831249
chrX	58221668	58221669	58248102																																		1
chrX	62872569	62872570	62092039
chrX	62883107	62883108	62102577														1													0
chrX	62987719	62987720	62207189						1												1
chrX	64126445	64126446	63346325
chrX	64852071	64852072	64071951															0						0				1
chrX	65017029	65017030	64236909																													1
chrX	70134650	70134651	69354500	0										1
chrX	71181533	71181534	70401383
chrX	71882458	71882459	71102308																			0
chrX	72020286	72020287	71240136
chrX	73416095	73416096	72635931											1
chrX	78532203	78532204	77787700														1																						1
chrX	80334930	80334931	79590429																																									1
chrX	80334932	80334933	79590431																																									1
chrX	88246748	88246749	87501749																						1
chrX	95610474	95610475	94865473
chrX	96003001	96003002	95258000																						1																		1
chrX	103348258	103348259	102603186																	0					1																			1
chrX	103396357	103396358	102651285																			0
chrX	105962457	105962458	105206449														1
chrX	106132534	106132535	105376527				1						0
chrX	107273111	107273112	106516341																																											1
chrX	117268063	117268064	116402026																				1													0
chrX	119223145	119223146	118357108	0	1
chrX	121892809	121892810	121026662						0
chrX	132111859	132111860	131245887							0												0				0																1
chrX	134427095	134427096	133561125
chrX	134797844	134797845	133931874
chrX	136209152	136209153	135291311								0
chrX	155307322	155307323	154536635
chrX	2799944	2799945	2717985																																			1
chrX	11757205	11757206	11775324																			1						1									1
chrX	21506986	21506987	21525104	1
chrX	30887704	30887705	30905821																					0				0
chrX	36961783	36961784	36979856
chrX	46130273	46130274	45989708									1
chrX	52983245	52983246	53012415																																	1
chrX	54676779	54676780	54703212								1
chrX	54830936	54830937	54857369				1						0																								1		1
chrX	63061053	63061054	62280523																	1
chrX	73116815	73116816	72336654
chrX	77456731	77456732	76712222																									1
chrX	102649372	102649373	101904300																																														1
chrX	103332713	103332714	102587641																																1
chrX	106263724	106263725	105506940																																									1
chrX	119995576	119995577	119129539																							1
chrX	129973959	129973960	129107935								1
chrX	146710915	146710916	145792433
chrX	150293559	150293560	149461792
chrX	31079925	31079926	31098042				1	1				1				0				1							1	1				1		0		0
chrX	62476441	62476442	61695911																														1
chrX	155641677	155641678	154871338			0						0	0										1			0								1	1		1	1		1				0
chrX	155641633	155641634	154871294									0											1			0								1	0			1		1
chrX	155641598	155641599	154871259									0											1											1				1		1	1
chrX	73128232	73128233	72348071	0																1		0
chrX	73128258	73128259	72348097	0																0		0
chrX	57998178	57998179	58024612
chrX	89127377	89127378	88382378																						0
chrX	58011892	58011893	58038326			1																																										0
chrX	131157011	131157012	130290985	1			1																														1			1
chrX	66511872	66511873	65731714																				1
chrX	62498956	62498957	61718426
chrX	73850498	73850499	73070333
chrX	80399212	80399213	79654711	0																																									0
chrX	12820080	12820081	12838199															1							0
chrX	55342418	55342419	55368851				1		1									1
chrX	58108451	58108452	58134885													0																0																1	1
chrX	58375052	58375053	58401485
chrX	65855134	65855135	65074976																							0																0
chrX	58394146	58394147	58420579											1
chrX	30771831	30771832	30789948									0																																1
chrX	57030832	57030833	57057265																									0
chrX	62783023	62783024	62002493
chrX	62911252	62911253	62130722																												1
chrX	62945544	62945545	62165014
chrX	63950065	63950066	63169945											0																						0
chrX	48581933	48581934	48440321			1
chrX	55377611	55377612	55404044
chrX	72239545	72239546	71459395					1																																		0
chrX	117969973	117969974	117103936									1																																				1
chrX	16087226	16087227	16105349
chrX	58192638	58192639	58219072
chrX	71155040	71155041	70374890
chrX	106173109	106173110	105417102
chrX	108072101	108072102	107315331
chrX	132819970	132819971	131953998
chrX	155641447	155641448	154871108												1											0		0										1
chrX	11119738	11119739	11137858		1
chrX	15045774	15045775	15063896				1
chrX	55909412	55909413	55935845								1
chrX	58079820	58079821	58106254															1
chrX	58107231	58107232	58133665										0
chrX	58132454	58132455	58158888									1																												1	1
chrX	58374999	58375000	58401432																																							0
chrX	58467586	58467587	58494019														1					1
chrX	62961222	62961223	62180692
chrX	78092414	78092415	77347911
chrX	122589477	122589478	121723330				0																1									1			1		0
chrX	80216307	80216308	79471806																															1
chrX	133984173	133984174	133118200																1
chrX	15336807	15336808	15354929					1								0			1																								0		1
chrX	20058134	20058135	20076252																																														1
chrX	29522105	29522106	29540222										0															1					1
chrX	58224021	58224022	58250455									0						1			1				0			1			1
chrX	62681066	62681067	61900536																		1		1
chrX	63015268	63015269	62234738
chrX	63634118	63634119	62853998			0
chrX	121800560	121800561	120934413			1																											1
chrX	139225456	139225457	138307618																											1			1
chrX	150063046	150063047	149231277							1																								1
chrX	152632350	152632351	151800804													1																		1	1
chrX	155215731	155215732	154444008
chrX	17302123	17302124	17320246																												1		1
chrX	35953366	35953367	35971483
chrX	39688488	39688489	39547742		1							1
chrX	44960632	44960633	44819877																								0			1
chrX	50505485	50505486	50248485																									0
chrX	56731079	56731080	56757512																																														0
chrX	58101735	58101736	58128169																							1					0
chrX	58120704	58120705	58147138																								0										1
chrX	58223403	58223404	58249837														1						1			0
chrX	58255936	58255937	58282370																																										0
chrX	58393757	58393758	58420190						1		0																																	1
chrX	88183284	88183285	87438285							1																																							1
chrX	93298961	93298962	92553960																			1																							1
chrX	133984184	133984185	133118211																0
chrX	145393855	145393856	144475373					0
chrX	17348025	17348026	17366148
chrX	58212983	58212984	58239417																																													1
chrX	58223609	58223610	58250043									1
chrX	58394203	58394204	58420636
chrX	123218584	123218585	122352435																														1
chrX	133984175	133984176	133118202																1
chrX	136878102	136878103	135960261																																			1							0
chrX	137792321	137792322	136874480																				0															1									0
chrX	8187599	8187600	8155640																		1							0			0
chrX	9199566	9199567	9167607					0								1		1	1
chrX	30865207	30865208	30883324																	1
chrX	55674021	55674022	55700454
chrX	57055845	57055846	57082278										1
chrX	58038180	58038181	58064614
chrX	58211036	58211037	58237470																																	1
chrX	58363105	58363106	58389538																									1
chrX	62632668	62632669	61852138																																									1
chrX	64788015	64788016	64007895
chrX	64807777	64807778	64027657
chrX	72274408	72274409	71494258									0																			1
chrX	73447984	73447985	72667820			1																															1											1	1
chrX	81106917	81106918	80362416
chrX	86002662	86002663	85257666										0
chrX	145213679	145213680	144295199
chrX	151400464	151400465	150568936								0								1																										1
chrX	18647491	18647492	18665611																																									0
chrX	32257043	32257044	32275160		1				1
chrX	47321743	47321744	47181142																							1
chrX	48490533	48490534	48348921										1																			1				1
chrX	58016114	58016115	58042548	1																0							0
chrX	58182793	58182794	58209227																			0
chrX	58182964	58182965	58209398
chrX	58228300	58228301	58254734					1												1						0
chrX	62708411	62708412	61927881																														0
chrX	63118848	63118849	62338318
chrX	67250485	67250486	66470327																								1																		1
chrX	78957739	78957740	78213236
chrX	102022738	102022739	101277711																											0
chrX	119995674	119995675	119129637																1
chrX	120000942	120000943	119134899																									0
chrX	131046836	131046837	130180810																																1
chrX	133984180	133984181	133118207																0
chrX	134138967	134138968	133272997																							0				1												0
chrX	138605668	138605669	137687829																																			1
chrX	147394392	147394393	146475910					1																1									1
chrX	154362310	154362311	153590678							0																			0				0															0
chrX	83998080	83998081	83253088
chrX	145829184	145829185	144910702									1
chrX	22081481	22081482	22099599
chrX	49230298	49230299	49086760									1																	1										0
chrX	51802671	51802672	51545767
chrX	52994836	52994837	53024015													0
chrX	54289959	54289960	54316392																1
chrX	55067825	55067826	55094258																																			1
chrX	56508295	56508296	56534728											1															1									0
chrX	56925668	56925669	56952101		1																												1
chrX	58011836	58011837	58038270			1
chrX	58144967	58144968	58171401												1																						1
chrX	58167716	58167717	58194150																																								0					1
chrX	58414304	58414305	58440737
chrX	63057253	63057254	62276723														0										0
chrX	64604894	64604895	63824774																																													0
chrX	66524937	66524938	65744779		1															1				1																		1
chrX	70505261	70505262	69725111																																	0
chrX	74270047	74270048	73489882																																			0
chrX	74926303	74926304	74146138							0
chrX	77036701	77036702	76257125						0			0								0
chrX	77190689	77190690	76411152															0																				0
chrX	77742959	77742960	76998440								1																		1
chrX	100785687	100785688	100040676												1					0											0
chrX	106359931	106359932	105603160
chrX	106863107	106863108	106106337								1
chrX	126553133	126553134	125687116							1																														0
chrX	6129678	6129679	6047719
chrX	13752889	13752890	13771008
chrX	15143947	15143948	15162069	1																											1
chrX	25969102	25969103	25987219												1
chrX	40090836	40090837	39950089
chrX	49234824	49234825	49091284										0																	0
chrX	51421030	51421031	51163882		1																								1						0
chrX	57267205	57267206	57293638						0
chrX	57841428	57841429	57867861			1
chrX	58003313	58003314	58029747					1								0
chrX	58015769	58015770	58042203																																								0
chrX	58106545	58106546	58132979																					1													1
chrX	58129814	58129815	58156248						0
chrX	58213823	58213824	58240257								1											1
chrX	58233663	58233664	58260097
chrX	58255416	58255417	58281850
chrX	58255495	58255496	58281929																																					1
chrX	58357402	58357403	58383835															0							1							0								1
chrX	62869313	62869314	62088783
chrX	62987837	62987838	62207307						1							0																												1
chrX	64894759	64894760	64114639								1
chrX	65240970	65240971	64460850
chrX	67543517	67543518	66763359					1																						1
chrX	68822564	68822565	68042407											0	1																																	1
chrX	73128287	73128288	72348126	0																1		0
chrX	74259006	74259007	73478841	1
chrX	78105969	78105970	77361466			1																																0
chrX	78105972	78105973	77361469			1																																0
chrX	82156927	82156928	81412376										1																																	1
chrX	82556677	82556678	81812126																	1																						1
chrX	102152235	102152236	101407207																				1										1
chrX	103557440	103557441	102812368												1																									1									1
chrX	104256205	104256206	103500886			1																										0
chrX	110915198	110915199	110158426																									0
chrX	119274038	119274039	118408001																																					1								0
chrX	131046824	131046825	130180798																																1
chrX	132413709	132413710	131547737	1																																					1
chrX	134918109	134918110	134052139																																												0
chrX	135031771	135031772	134165801	0														1							0
chrX	145089593	145089594	144171113										1			1																1
chrX	71809939	71809940	71029789
chrX	102718412	102718413	101973340																																									1
chrX	107471108	107471109	106714338																	1
chrX	7927063	7927064	7895104								1								1				1					1
chrX	8688527	8688528	8656568																																					0
chrX	10118507	10118508	10086547									1							1												1	1
chrX	19889026	19889027	19907144														1
chrX	41421419	41421420	41280672									1
chrX	44342487	44342488	44201733																																						1
chrX	48581318	48581319	48439706																																					1
chrX	49068976	49068977	48926512																									0
chrX	54289833	54289834	54316266																								1
chrX	55801983	55801984	55828416																									1							1
chrX	56910085	56910086	56936518
chrX	57056171	57056172	57082604
chrX	57982781	57982782	58009215
chrX	58089963	58089964	58116397																					1										1
chrX	58100557	58100558	58126991
chrX	58135885	58135886	58162319			0																1																1
chrX	58187197	58187198	58213631																																1
chrX	58328507	58328508	58354940																																		1												1
chrX	62946574	62946575	62166044										1																										1
chrX	63066491	63066492	62285961																			1
chrX	66329702	66329703	65549544																																								1
chrX	66587120	66587121	65806962
chrX	67195804	67195805	66415646										0																					0
chrX	68684624	68684625	67904466			1							0									0
chrX	68695299	68695300	67915141																																											1
chrX	73128038	73128039	72347877																			0
chrX	73431839	73431840	72651675																														1				1
chrX	77143668	77143669	76364124
chrX	77331632	77331633	76552095																														0
chrX	78929899	78929900	78185396														1
chrX	80486710	80486711	79742209
chrX	84275310	84275311	83530318																																										1
chrX	86046221	86046222	85301225																																0						0
chrX	94471170	94471171	93726169																0																1											0
chrX	99939649	99939650	99194647
chrX	100812352	100812353	100067341																																													0
chrX	106863060	106863061	106106290																			0
chrX	108001601	108001602	107244831			0																																1						1
chrX	111682695	111682696	110925923																											0																0
chrX	114626790	114626791	113861254																																									1
chrX	115660423	115660424	114894743																										0		1														1
chrX	126233559	126233560	125367542																										0									1								0	1
chrX	130109599	130109600	129243574																																					1	1
chrX	131456911	131456912	130590885		1			1
chrX	134807896	134807897	133941926						1																					1
chrX	136908885	136908886	135991044
chrX	154373220	154373221	153601588																			1											0	1
chrX	5899452	5899453	5817493										1
chrX	6022208	6022209	5940249				1
chrX	8783225	8783226	8751266																0						0																								1
chrX	10223626	10223627	10191666
chrX	15334514	15334515	15352636															1
chrX	30607329	30607330	30625446																								0													1									1
chrX	40582091	40582092	40441343
chrX	44917491	44917492	44776736								1															1
chrX	46210138	46210139	46069573																												1
chrX	54760402	54760403	54786835																						0
chrX	56889757	56889758	56916190													1
chrX	58115505	58115506	58141939									0																		1
chrX	58247466	58247467	58273900															1
chrX	62696858	62696859	61916328
chrX	62906296	62906297	62125766																			1											0											1
chrX	64053104	64053105	63272984					0			0						1			1
chrX	64085984	64085985	63305864																																	1
chrX	65018821	65018822	64238701																																							1
chrX	73128297	73128298	72348136	0																1		0
chrX	76643860	76643861	75864264
chrX	76681595	76681596	75901989																									0
chrX	83504443	83504444	82759451		1							1																								0
chrX	95122961	95122962	94377960								1															0
chrX	104408647	104408648	103653328
chrX	104972972	104972973	104217653
chrX	107447527	107447528	106690757
chrX	111519113	111519114	110762341								0																																	0
chrX	7089198	7089199	7007239																										0
chrX	19889022	19889023	19907140														1
chrX	19908755	19908756	19926873														1																		1
chrX	49041152	49041153	48898679																							1	1																			1	1
chrX	49876520	49876521	49641123										0
chrX	58040084	58040085	58066518
chrX	58396368	58396369	58422801									1																	1																		0
chrX	68499698	68499699	67719540								0																	1
chrX	119880897	119880898	119014860
chrX	119992767	119992768	119126730																								0
chrX	3277817	3277818	3195858
chrX	8773248	8773249	8741289																															0
chrX	12211148	12211149	12229267																													1														1
chrX	12373680	12373681	12391799																																										0
chrX	13152164	13152165	13170283																																														1
chrX	17121843	17121844	17139966										1							0											0
chrX	17690624	17690625	17708744																		1
chrX	17981407	17981408	17999527																										1		1
chrX	36985306	36985307	37003379
chrX	38617064	38617065	38476317																															1
chrX	39906104	39906105	39765358																																										0
chrX	41710449	41710450	41569702						1
chrX	45859787	45859788	45719222	1																					1				1
chrX	47509459	47509460	47368858													0																				0
chrX	52984060	52984061	53013228																												0			1
chrX	57985702	57985703	58012136																														0													1
chrX	58118543	58118544	58144977																																		1
chrX	58128658	58128659	58155092																															1
chrX	58181922	58181923	58208356
chrX	62501013	62501014	61720483
chrX	62708208	62708209	61927678													0																			1					0					0	1
chrX	62875786	62875787	62095256
chrX	62888151	62888152	62107621														1							1
chrX	62927330	62927331	62146800																	0
chrX	66030952	66030953	65250794
chrX	66281269	66281270	65501111																																0
chrX	69158577	69158578	68378420											1									1
chrX	70496717	70496718	69716567												1									1
chrX	83936185	83936186	83191193						1																											0
chrX	99940015	99940016	99195013																																									0
chrX	101347370	101347371	100602358																									1
chrX	114500700	114500701	113735153						0		1				1
chrX	118115087	118115088	117249050																																	1
chrX	120001651	120001652	119135608																																		0												0
chrX	123245682	123245683	122379533									0
chrX	123981865	123981866	123115715																																														0
chrX	126166911	126166912	125300894						1													1
chrX	131887363	131887364	131021391																																					1
chrX	132820043	132820044	131954071																	1																												1
chrX	133410713	133410714	132544741														0																						0
chrX	134144343	134144344	133278373																																													1
chrX	134533977	134533978	133668007
chrX	137080159	137080160	136162318					1													1													1
chrX	143437283	143437284	142525077
chrX	145167872	145167873	144249392					1																				1
chrX	148913716	148913717	147995246																				1				1							1
chrX	152452301	152452302	151620773															1				1										0
chrX	155191165	155191166	154419440								0															0											1
chrX	9051895	9051896	9019936																																									0	1
chrX	9765293	9765294	9733333
chrX	9785612	9785613	9753652				0			0											0																	0
chrX	15956920	15956921	15975043																																				0
chrX	16939489	16939490	16957612																							1			1
chrX	24294880	24294881	24312997									1																				0		0
chrX	27706226	27706227	27724343
chrX	28416391	28416392	28434508							1										1																0
chrX	35038793	35038794	35056910
chrX	41696666	41696667	41555919													1
chrX	55562697	55562698	55589130																			1
chrX	55636270	55636271	55662703																												1
chrX	57559138	57559139	57585571																																									0
chrX	58010943	58010944	58037377															1												1
chrX	58137238	58137239	58163672																0
chrX	58195354	58195355	58221788																		1
chrX	58201121	58201122	58227555																												1
chrX	58226635	58226636	58253069																									1														0		1
chrX	58357118	58357119	58383551																							1
chrX	62846435	62846436	62065905														0			1
chrX	62959820	62959821	62179290																										1
chrX	62961287	62961288	62180757
chrX	63011367	63011368	62230837																						0				0
chrX	64898074	64898075	64117954
chrX	66107131	66107132	65326973
chrX	66330988	66330989	65550830
chrX	66342675	66342676	65562517												0											1								0										1
chrX	66994934	66994935	66214776					0																																									1
chrX	67817425	67817426	67037267											1																					1
chrX	68488747	68488748	67708589																																											1
chrX	71368138	71368139	70587988															1																1						0
chrX	71615774	71615775	70835624																				1
chrX	76303294	76303295	75523693																																		1
chrX	77143918	77143919	76364374																																	1
chrX	77503006	77503007	76758484																			1
chrX	78017429	78017430	77272926																							1
chrX	94886842	94886843	94141841																											1
chrX	99940048	99940049	99195046																																		1							0
chrX	100396752	100396753	99651750												1
chrX	100736132	100736133	99991121
chrX	105821403	105821404	105065396			0
chrX	114162269	114162270	113405483						1																		0										0
chrX	116943047	116943048	116077015
chrX	122808587	122808588	121942440				1			1
chrX	152016548	152016549	151185020					1
chrX	154355612	154355613	153583980																																								1
chrX	155217793	155217794	154446070
chrX	8685280	8685281	8653321					1																	1				1
chrX	16843671	16843672	16861794					1						1																											0	0
chrX	22485521	22485522	22503638																																		0			0
chrX	41344941	41344942	41204194
chrX	43661117	43661118	43520365
chrX	56940513	56940514	56966946																										0						0
chrX	63032854	63032855	62252324									1																				1
chrX	103546551	103546552	102801479																															1
chrX	103663834	103663835	102918762																							0																							1
chrX	108851712	108851713	108094942																																					1
chrX	128038341	128038342	127172320
chrX	129106902	129106903	128240879	1																																													1
chrX	134681291	134681292	133815321																					0												0
chrX	2841712	2841713	2759753																																							1
chrX	3343683	3343684	3261724
chrX	3343703	3343704	3261744
chrX	5907558	5907559	5825599																																				1
chrX	9636827	9636828	9604867
chrX	14036425	14036426	14054544													0
chrX	15194944	15194945	15213066		1																							0
chrX	22384182	22384183	22402299			1							0
chrX	23318198	23318199	23336315																									1
chrX	28702596	28702597	28720713						0			1
chrX	31658844	31658845	31676961						0
chrX	43644534	43644535	43503782
chrX	48576335	48576336	48434723										1			1
chrX	49061535	49061536	48919066												0																										0
chrX	51334648	51334649	51077500																	0			1					1
chrX	55405184	55405185	55431617	1
chrX	55688191	55688192	55714624																															1				0
chrX	57163517	57163518	57189950																																		0
chrX	58019491	58019492	58045925																																								1
chrX	58023002	58023003	58049436										1																				1										0						0
chrX	58031313	58031314	58057747			0	1																																					1
chrX	58054354	58054355	58080788		0														0									0
chrX	58159278	58159279	58185712				1		0	0																																	0
chrX	58177897	58177898	58204331									1								1
chrX	58252048	58252049	58278482
chrX	58337579	58337580	58364012					0																																				0
chrX	62847858	62847859	62067328									1
chrX	62852403	62852404	62071873																0										0
chrX	63033795	63033796	62253265
chrX	64130758	64130759	63350638																							0
chrX	64620419	64620420	63840299											1								1
chrX	64664047	64664048	63883927																					0
chrX	64814979	64814980	64034859																																									0
chrX	65620062	65620063	64839941
chrX	72554974	72554975	71774824		0									1									0
chrX	77494320	77494321	76749798																																					0				0
chrX	77907956	77907957	77163453	0		1
chrX	81316337	81316338	80571836
chrX	83504426	83504427	82759434		1							1																								0
chrX	83504447	83504448	82759455		1							1
chrX	91115945	91115946	90370944																														1
chrX	99192205	99192206	98447203								1
chrX	101291548	101291549	100546536							0
chrX	101334557	101334558	100589545																							0			1														0
chrX	102021892	102021893	101276865																				1								0
chrX	102970385	102970386	102225313																					0					0																		0
chrX	110346942	110346943	109590170
chrX	113517292	113517293	112760563							0																																	1
chrX	116962179	116962180	116096147																																0
chrX	119618016	119618017	118751979																																			0
chrX	119994723	119994724	119128686																																						0
chrX	120001719	120001720	119135676					1																													0												0
chrX	120014517	120014518	119148474
chrX	123514173	123514174	122648024																						1
chrX	126552269	126552270	125686252																					1							1
chrX	126552303	126552304	125686286																					1																0
chrX	129655693	129655694	128789670
chrX	132219702	132219703	131353730
chrX	133986439	133986440	133120466										1																			0															1
chrX	135688352	135688353	134822067					1									0		0													1											1
chrX	144722496	144722497	143804017
chrX	149641707	149641708	148723360																								1			1
chrX	153007440	153007441	152175984										1											1		1										1
chrX	3526341	3526342	3444382				1													1
chrX	5648066	5648067	5566107									0				0						1					0
chrX	7808588	7808589	7776629		1																								1		1
chrX	10697710	10697711	10665750																								0															1
chrX	12373776	12373777	12391895
chrX	12477545	12477546	12495664																					1
chrX	20268767	20268768	20286885											1																																		1
chrX	21658158	21658159	21676276																																							1
chrX	23908928	23908929	23927045
chrX	31299478	31299479	31317595
chrX	43881958	43881959	43741204																				1
chrX	44961743	44961744	44820988								1
chrX	45773115	45773116	45632518																																	1
chrX	48800581	48800582	48658988
chrX	51804259	51804260	51547355																																			1	0
chrX	52125502	52125503	51868598								0
chrX	53272491	53272492	53301673		1					1								0
chrX	55228955	55228956	55255388									1								1
chrX	55660002	55660003	55686435												1							1
chrX	56604388	56604389	56630821
chrX	58136503	58136504	58162937											1	1
chrX	58139340	58139341	58165774																									1
chrX	58149606	58149607	58176040															0
chrX	58194118	58194119	58220552																				0									1								0	1	1
chrX	58256203	58256204	58282637										0																																1
chrX	58432420	58432421	58458853						0
chrX	58436113	58436114	58462546	1																					1																						0
chrX	62527359	62527360	61746829
chrX	62583879	62583880	61803349
chrX	62856781	62856782	62076251
chrX	63005458	63005459	62224928																													0													0
chrX	63096760	63096761	62316230
chrX	65898840	65898841	65118682												1
chrX	66309919	66309920	65529761
chrX	67199316	67199317	66419158												1	1			0																				0							1
chrX	68421920	68421921	67641762																			1											1
chrX	68499738	68499739	67719580								0																	1																		1
chrX	71129158	71129159	70349008
chrX	73768313	73768314	72988148	1		0
chrX	74286273	74286274	73506108
chrX	75167676	75167677	74387511
chrX	80512946	80512947	79768445																																			1
chrX	89393153	89393154	88648152																						1
chrX	94808020	94808021	94063019							0
chrX	99940058	99940059	99195056																																		1							0
chrX	100930104	100930105	100185093
chrX	101551897	101551898	100806880
chrX	102087117	102087118	101342089								1
chrX	105821377	105821378	105065370			0
chrX	108084523	108084524	107327753																									0										1								1
chrX	108438697	108438698	107681927		1
chrX	109728487	109728488	108971716	0																																			1
chrX	119273201	119273202	118407164											0					0
chrX	125170197	125170198	124304046
chrX	133046182	133046183	132180210																																														1
chrX	143293273	143293274	142381051				1																					0
chrX	145846623	145846624	144928141									1
chrX	149853391	149853392	148982191
chrX	154785965	154785966	154014240
chrX	155187083	155187084	154415358
chrX	6694514	6694515	6612555	0
chrX	10328005	10328006	10296045												1																																1
chrX	21658155	21658156	21676273																								1															1
chrX	34827118	34827119	34845235				1
chrX	38663062	38663063	38522315															0
chrX	43881838	43881839	43741084										0																										1
chrX	47249220	47249221	47108619
chrX	54287283	54287284	54313716																														0
chrX	65036105	65036106	64255985
chrX	71252977	71252978	70472827																																					0				1
chrX	74611974	74611975	73831809
chrX	88700090	88700091	87955091																								1
chrX	131841947	131841948	130975975																																						0
chrX	149377264	149377265	148458794
chrX	9352874	9352875	9320914
chrX	11419338	11419339	11437458
chrX	11664176	11664177	11682296						0																											1
chrX	11760181	11760182	11778300
chrX	11770161	11770162	11788280																		0
chrX	17854968	17854969	17873088									0											1		0												1
chrX	19184232	19184233	19202350												0																			0
chrX	19513797	19513798	19531915																					1														0
chrX	19514135	19514136	19532253
chrX	21838823	21838824	21856941			1			1																																0
chrX	21984941	21984942	22003059																											0
chrX	27863849	27863850	27881966
chrX	31464549	31464550	31482666																	1											1
chrX	38580353	38580354	38439606																0														1					1
chrX	40314255	40314256	40173508																								0
chrX	47281795	47281796	47141194		1
chrX	49142250	49142251	48998585																				1							1				0					0
chrX	49210603	49210604	49067063					1
chrX	53000573	53000574	53029752			1
chrX	55009229	55009230	55035662
chrX	56572771	56572772	56599204	0				0																														0
chrX	56648874	56648875	56675307										1																						0
chrX	57045227	57045228	57071660											1	0																	0
chrX	57910999	57911000	57937433																																	0
chrX	58002429	58002430	58028863											1																																		1
chrX	58139696	58139697	58166130	0
chrX	58459182	58459183	58485615										1											0
chrX	62823351	62823352	62042821											0			0										1									1											1
chrX	62940727	62940728	62160197
chrX	62966453	62966454	62185923													1																											0
chrX	63714964	63714965	62934844													1																	1								1	0
chrX	64140802	64140803	63360682													0
chrX	65408493	65408494	64628373																		1
chrX	66436061	66436062	65655903														1
chrX	66456141	66456142	65675983
chrX	66525215	66525216	65745057																			1
chrX	66525347	66525348	65745189
chrX	66697307	66697308	65917149																									1								1
chrX	67543603	67543604	66763445					1
chrX	68175836	68175837	67395678			1																			1																						1
chrX	68755888	68755889	67975730													0
chrX	71053238	71053239	70273088
chrX	71250980	71250981	70470830
chrX	71871117	71871118	71090967													0
chrX	73127828	73127829	72347667																																								0	0
chrX	79023510	79023511	78279007
chrX	83345868	83345869	82600876
chrX	86002952	86002953	85257956	0																																				0
chrX	86315250	86315251	85570253		1										0						1										1
chrX	95326766	95326767	94581765												1																														1
chrX	101360637	101360638	100615625																			1						1						1						1							1
chrX	103534252	103534253	102789180													1
chrX	104253305	104253306	103497986																															1
chrX	105527117	105527118	104771110																																	0	1
chrX	108834210	108834211	108077440
chrX	109554105	109554106	108797334												1
chrX	113967445	113967446	113210705
chrX	118206142	118206143	117340105
chrX	119669568	119669569	118803531																																0
chrX	120001592	120001593	119135549					0																													0
chrX	123261804	123261805	122395655		0																	0						0			0
chrX	123714303	123714304	122848153
chrX	124434580	124434581	123568430																														0
chrX	131523990	131523991	130657964
chrX	135425697	135425698	134559622																																								1
chrX	135659129	135659130	134792844											1						1
chrX	136585319	136585320	135667478																										1
chrX	138029993	138029994	137112152				1																																		0
chrX	139423440	139423441	138505599															0
chrX	139933913	139933914	139016072																																						1			0
chrX	142010821	142010822	141098607
chrX	151108763	151108764	150277235																									1
chrX	152602268	152602269	151770741															1
chrX	155086709	155086710	154314984																			0
chrX	9820518	9820519	9788558															0
chrX	11112250	11112251	11130370																																											0	1
chrX	11664049	11664050	11682169																																				1					1
chrX	11854743	11854744	11872862												0																				1											1
chrX	12046463	12046464	12064582																									1
chrX	13482811	13482812	13500930
chrX	13952964	13952965	13971083
chrX	14414202	14414203	14432324																																														1
chrX	14567000	14567001	14585122									1	0
chrX	15848335	15848336	15866458																										0
chrX	17068993	17068994	17087116														1
chrX	20269449	20269450	20287567																																									1
chrX	20973080	20973081	20991198																																		1										1
chrX	31464828	31464829	31482945
chrX	32643676	32643677	32661793																						1	1														0
chrX	34633384	34633385	34651501																												0
chrX	37509662	37509663	37368915																													1			1									1
chrX	40418678	40418679	40277930																			1						1								0													1
chrX	46836462	46836463	46695897																																							1
chrX	49234116	49234117	49090575																														1
chrX	50332929	50332930	50075928											1															1
chrX	55396885	55396886	55423318
chrX	56453652	56453653	56480085																			0											0
chrX	56919250	56919251	56945683
chrX	56935837	56935838	56962270																															0
chrX	57737179	57737180	57763612				0																																					1
chrX	57858696	57858697	57885129																													1
chrX	57910997	57910998	57937431																																	1
chrX	58081319	58081320	58107753																										1
chrX	58090253	58090254	58116687																															1
chrX	58098643	58098644	58125077																																								0
chrX	58168708	58168709	58195142			0														1												1
chrX	58175759	58175760	58202193																																1
chrX	58297009	58297010	58323442		1
chrX	58339627	58339628	58366060									1																			1
chrX	58354932	58354933	58381365				0																	0																					0
chrX	58390358	58390359	58416791													1																								0
chrX	58436122	58436123	58462555	1																																											0
chrX	62783544	62783545	62003014
chrX	62813995	62813996	62033465			1	1																											0												1
chrX	62910863	62910864	62130333											1												0
chrX	63072345	63072346	62291815						1
chrX	65932364	65932365	65152206																													1
chrX	66552459	66552460	65772301		1																																		1						1
chrX	66912517	66912518	66132359		1
chrX	68511273	68511274	67731115																														1
chrX	70587875	70587876	69807725																																									1		1
chrX	73127774	73127775	72347613							1																																	0	0
chrX	73250238	73250239	72470074																																				0
chrX	76633318	76633319	75853723											1								1																									1
chrX	80189021	80189022	79444520
chrX	85427664	85427665	84682669																		0
chrX	90836932	90836933	90091931																							0																0
chrX	99939481	99939482	99194479														1														1					1													0
chrX	99939731	99939732	99194729
chrX	99940071	99940072	99195069																																		1							0
chrX	99940093	99940094	99195091																																		1							1
chrX	100731267	100731268	99986255
chrX	103120718	103120719	102375646															1									0
chrX	106248211	106248212	105491427									1								0
chrX	109734023	109734024	108977252
chrX	111447389	111447390	110690617																																		1
chrX	111682503	111682504	110925731																												1
chrX	111784920	111784921	111028148																	1	1				1											1
chrX	115969966	115969967	115086299
chrX	118823205	118823206	117957168
chrX	129469436	129469437	128603413
chrX	129605950	129605951	128739927						1																										1
chrX	129739220	129739221	128873196																													1
chrX	129974468	129974469	129108444																									1
chrX	129984998	129984999	129118974								1																																1	1
chrX	134570612	134570613	133704642
chrX	135020020	135020021	134154050																					1
chrX	137051533	137051534	136133692
chrX	145748067	145748068	144829585							1																																		1
chrX	151176983	151176984	150345455							0
chrX	151753272	151753273	150921744
chrX	154670880	154670881	153899154																								0													0		0
chrX	6210844	6210845	6128885																				1																1
chrX	10172524	10172525	10140564																						1
chrX	17851822	17851823	17869942										1				0																		1
chrX	38675794	38675795	38535048
chrX	40104753	40104754	39964006
chrX	49184285	49184286	49040738																				1					0											1
chrX	51461819	51461820	51204671																	1																						0
chrX	56429579	56429580	56456012											0															1																			1
chrX	62944960	62944961	62164430												1			1			1																							0		1
chrX	77534731	77534732	76790210
chrX	120392153	120392154	119526008	0		1								0
chrX	134534008	134534009	133668038							0
chrX	136908791	136908792	135990950
chrX	10846656	10846657	10864775
chrX	11386189	11386190	11404309			0												1																											0
chrX	12383535	12383536	12401654
chrX	12598494	12598495	12616613										0							0																								1
chrX	15769399	15769400	15787522				1		1
chrX	17551763	17551764	17569884							0
chrX	18932204	18932205	18950322					0					1																																	1
chrX	21656697	21656698	21674815					0
chrX	30999854	30999855	31017971																							1
chrX	41090926	41090927	40950179
chrX	41237626	41237627	41096879																		0
chrX	46486033	46486034	46345468
chrX	47141212	47141213	47000611					1		1																						1
chrX	47926628	47926629	47786027																										1										0		1
chrX	48898930	48898931	48756207
chrX	51748109	51748110	51491205																						0
chrX	52851424	52851425	52880461																											1					1
chrX	53000579	53000580	53029758			0
chrX	56382552	56382553	56408985											1																											0
chrX	57404785	57404786	57431218																																					1
chrX	57595461	57595462	57621894																		1
chrX	57949489	57949490	57975923						0
chrX	58029622	58029623	58056056																																		1
chrX	58140189	58140190	58166623																																								1
chrX	58141894	58141895	58168328
chrX	58150621	58150622	58177055																						0
chrX	58227810	58227811	58254244																														0
chrX	58228087	58228088	58254521												0																		1
chrX	58260136	58260137	58286570																											1
chrX	58421355	58421356	58447788																																							1
chrX	62740873	62740874	61960343																																						0
chrX	62848752	62848753	62068222
chrX	63060948	63060949	62280418									1	0																										0
chrX	64487916	64487917	63707796																																			1
chrX	64630786	64630787	63850666																													1
chrX	65917952	65917953	65137794
chrX	66425928	66425929	65645770																																						0
chrX	66697498	66697499	65917340							1																	0									1								1
chrX	66762246	66762247	65982088
chrX	67793191	67793192	67013033																																												1
chrX	68462520	68462521	67682362
chrX	68687122	68687123	67906964
chrX	69222056	69222057	68441899
chrX	70291162	70291163	69511012
chrX	70661337	70661338	69881187
chrX	74015915	74015916	73235750										0		0																															0
chrX	77167425	77167426	76387890										1																														1
chrX	77494399	77494400	76749877																																									0
chrX	78131486	78131487	77386983																	1				1																				0
chrX	83953733	83953734	83208741
chrX	100378726	100378727	99633724																																	1
chrX	104038503	104038504	103293066					1
chrX	107777705	107777706	107020935																		1						0
chrX	108416091	108416092	107659321														1
chrX	112462301	112462302	111705529																																				1
chrX	112846080	112846081	112089308
chrX	116043623	116043624	115174876												1
chrX	116299636	116299637	115430773		0									1								0
chrX	117832876	117832877	116966839	0																																									1
chrX	119057121	119057122	118191084																						0											0	1					0				1
chrX	119566670	119566671	118700633
chrX	119610928	119610929	118744891																																			0						0
chrX	123054358	123054359	122188211																							1				1
chrX	123450390	123450391	122584241	1									1			1									1
chrX	129539862	129539863	128673839																																								0
chrX	130055266	130055267	129189241														0															1
chrX	132055012	132055013	131189040
chrX	132742213	132742214	131876241																																						1
chrX	135524999	135525000	134658924
chrX	135911102	135911103	134993261																																										1
chrX	139206385	139206386	138288547
chrX	143536183	143536184	142624020
chrX	144978228	144978229	144059748															1						1
chrX	154477077	154477078	153705417							1																																				1
chrX	2804634	2804635	2722675		1
chrX	3428992	3428993	3347033
chrX	3712105	3712106	3630146				0														1
chrX	4320368	4320369	4238409																																	1										1
chrX	7926398	7926399	7894439																											0
chrX	9420937	9420938	9388977	1																				1													0
chrX	10120565	10120566	10088605										1					1
chrX	15575773	15575774	15593896
chrX	16720830	16720831	16738953													1													0	1			0
chrX	16836592	16836593	16854715			1
chrX	18980704	18980705	18998822
chrX	23396233	23396234	23414350																	1																1
chrX	30560876	30560877	30578993								1
chrX	34267618	34267619	34285735
chrX	38178309	38178310	38037562																			1															1
chrX	46130894	46130895	45990329																0																												1
chrX	49234104	49234105	49090563																														1
chrX	50876628	50876629	50619628
chrX	51745773	51745774	51488869
chrX	53000635	53000636	53029814			1
chrX	53000788	53000789	53029967			0								1
chrX	53597006	53597007	53623966	0
chrX	55705306	55705307	55731739					1
chrX	57133602	57133603	57160035																																					1	0
chrX	57833273	57833274	57859706
chrX	57982701	57982702	58009135												1										1
chrX	58004812	58004813	58031246																										1
chrX	58043366	58043367	58069800					1						0
chrX	58093821	58093822	58120255																																			1
chrX	58102658	58102659	58129092											0				1													1
chrX	58145942	58145943	58172376						1													0																			0
chrX	58149645	58149646	58176079															1
chrX	58155224	58155225	58181658
chrX	58237320	58237321	58263754																												1									1
chrX	58333607	58333608	58360040																		1																		0
chrX	58360511	58360512	58386944														0
chrX	58422831	58422832	58449264										0																																			1
chrX	58424677	58424678	58451110												1
chrX	58431208	58431209	58457641
chrX	58441923	58441924	58468356																																				1
chrX	58445794	58445795	58472227
chrX	62698983	62698984	61918453																															1
chrX	62750707	62750708	61970177																																													1
chrX	62958269	62958270	62177739				1
chrX	62981373	62981374	62200843																																												1
chrX	64487860	64487861	63707740				0										0																					1
chrX	64695580	64695581	63915460														0							1																				1
chrX	65945668	65945669	65165510																																1														1
chrX	65995144	65995145	65214986																							1																					0
chrX	66108109	66108110	65327951													1																						0
chrX	66328953	66328954	65548795																																								1
chrX	66329013	66329014	65548855												0													0															0				1
chrX	66526725	66526726	65746567																	0
chrX	66689726	66689727	65909568
chrX	66799318	66799319	66019160																	1						1									1										1
chrX	67152964	67152965	66372806									0																						0
chrX	69094658	69094659	68314501														1																								1				1
chrX	70452902	70452903	69672752																											1												0						1
chrX	71053204	71053205	70273054
chrX	71621859	71621860	70841709
chrX	71652158	71652159	70872008
chrX	73128101	73128102	72347940																			0
chrX	76626169	76626170	75846578																	1
chrX	77896373	77896374	77151870						0																																	1
chrX	84825008	84825009	84080015																																										1
chrX	85316464	85316465	84571470																						1											0
chrX	94147457	94147458	93402456
chrX	100397353	100397354	99652351																																									1
chrX	100769230	100769231	100024219	1
chrX	101822402	101822403	101077375				0											1
chrX	103332516	103332517	102587444						0
chrX	105821030	105821031	105065023																	1											0
chrX	107014973	107014974	106258203
chrX	107710999	107711000	106954229							1																											1
chrX	110852380	110852381	110095608																																			1
chrX	114039263	114039264	113282440																													1
chrX	114933513	114933514	114168076						1														1
chrX	119218222	119218223	118352185
chrX	119914329	119914330	119048292
chrX	123231241	123231242	122365092																																														1
chrX	123485745	123485746	122619596																									0										1
chrX	124194448	124194449	123328298				1																																				1
chrX	129984940	129984941	129118916								1																						1										1	1
chrX	130119190	130119191	129253165							1
chrX	131524236	131524237	130658210
chrX	131695110	131695111	130829138		1																1
chrX	131841759	131841760	130975787							1									1
chrX	133416603	133416604	132550631										1														1					0
chrX	135688250	135688251	134821965					1
chrX	136341539	136341540	135423698																							1											1
chrX	138387194	138387195	137469353
chrX	139206395	139206396	138288557
chrX	140057421	140057422	139139580
chrX	140305153	140305154	139387318												0									0
chrX	149630154	149630155	148711835
chrX	152915851	152915852	152084395																															1
chrX	153017448	153017449	152185992																														1
chrX	155242714	155242715	154470995				0						1																0
chrX	15676844	15676845	15694967	1							0																										0
chrX	17656883	17656884	17675003											0																														0
chrX	19347190	19347191	19365308							1					1	1
chrX	42071822	42071823	41931075			1																	1
chrX	53528783	53528784	53555747
chrX	55231062	55231063	55257495																					1
chrX	58196614	58196615	58223048							0			1
chrX	65070058	65070059	64289938										1																						1					1			1
chrX	70503579	70503580	69723429																					0
chrX	71178301	71178302	70398151																									1
chrX	72715003	72715004	71934851
chrX	77181930	77181931	76402393																															0
chrX	77223379	77223380	76443842																				0			1							0											1
chrX	104288536	104288537	103533217																			0
chrX	128374388	128374389	127508366																1
chrX	129360362	129360363	128494339																0
chrX	8946348	8946349	8914389									0											0																			1
chrX	9463587	9463588	9431627																																1		0
chrX	11139145	11139146	11157265																																									0
chrX	11341808	11341809	11359928																																0
chrX	11837700	11837701	11855819																																														1
chrX	12378362	12378363	12396481																																1												0
chrX	12413539	12413540	12431658								0												1														1
chrX	12979287	12979288	12997406
chrX	14616188	14616189	14634310																														0
chrX	17843225	17843226	17861345										1
chrX	23755979	23755980	23774096										1																1
chrX	24055631	24055632	24073748																																			1
chrX	24204444	24204445	24222561
chrX	25071565	25071566	25089682
chrX	30309665	30309666	30327782
chrX	30859264	30859265	30877381																					1
chrX	40449988	40449989	40309240													1																									1
chrX	41110323	41110324	40969576							1																				1
chrX	41918038	41918039	41777291
chrX	43881854	43881855	43741100										1												1														1
chrX	46102810	46102811	45962245
chrX	48579054	48579055	48437442																																						0
chrX	52645285	52645286	52674335
chrX	53804012	53804013	53830510
chrX	54722948	54722949	54749381																																					1
chrX	55343171	55343172	55369604								0		1					1														0
chrX	55688926	55688927	55715359
chrX	56449641	56449642	56476074																				0
chrX	56508217	56508218	56534650				0	0																										1				0	0
chrX	57028128	57028129	57054561								1																															0
chrX	57286568	57286569	57313001																1			0							1									1
chrX	57552098	57552099	57578531						1									1													1
chrX	57712316	57712317	57738749
chrX	57978014	57978015	58004448
chrX	57986019	57986020	58012453		0																					1
chrX	57997038	57997039	58023472																																	0
chrX	58026405	58026406	58052839
chrX	58035865	58035866	58062299																								0															0
chrX	58095408	58095409	58121842												1													0				0
chrX	58109307	58109308	58135741																																		1
chrX	58144201	58144202	58170635							0			1																							1													0
chrX	58261454	58261455	58287888																												0
chrX	58299426	58299427	58325859											1																				0
chrX	58358129	58358130	58384562					1																		0
chrX	58462563	58462564	58488996
chrX	58524428	58524429	58550861			1																			0											1							1
chrX	62517808	62517809	61737278																0																						1							0
chrX	62521808	62521809	61741278
chrX	62717582	62717583	61937052
chrX	62958224	62958225	62177694				0														1
chrX	62993558	62993559	62213028																												1																		1
chrX	63084755	63084756	62304225
chrX	63096952	63096953	62316422																	1												0
chrX	63979280	63979281	63199160																					0																				1	0			1
chrX	64207393	64207394	63427273							1				0
chrX	65971309	65971310	65191151																		0
chrX	66665268	66665269	65885110																1
chrX	66692421	66692422	65912263																																							0							1
chrX	68617553	68617554	67837395																				1
chrX	68834331	68834332	68054174					0
chrX	69136759	69136760	68356602				1	1																																							1
chrX	71367640	71367641	70587490							1
chrX	74179211	74179212	73399046		1
chrX	76498824	76498825	75719233
chrX	76561797	76561798	75782203					1																														1
chrX	76570926	76570927	75791315												1			0																													0
chrX	77896274	77896275	77151771
chrX	80547956	80547957	79803455																			1		1
chrX	85084885	85084886	84339891																																					0
chrX	85740590	85740591	84995595																		0				0
chrX	85788256	85788257	85043261
chrX	88293742	88293743	87548743
chrX	88932239	88932240	88187240			1																																										1
chrX	96689705	96689706	95944704													0																			1														1
chrX	101409669	101409670	100664657															1										1
chrX	103220733	103220734	102475661															1
chrX	104564895	104564896	103809576										1																						0
chrX	104570021	104570022	103814702
chrX	106712212	106712213	105955442
chrX	107507615	107507616	106750845
chrX	112662677	112662678	111905905					1																																		1
chrX	118495200	118495201	117629163					1																					1						0
chrX	120497872	120497873	119631727
chrX	121682127	121682128	120815980																																									1
chrX	121867793	121867794	121001646
chrX	123258665	123258666	122392516												1
chrX	125839572	125839573	124973554																																										1
chrX	132161790	132161791	131295818																																		1
chrX	134533504	134533505	133667534												1														1							1	1
chrX	135688429	135688430	134822144																													1
chrX	136169204	136169205	135251363		1																							1							0							0
chrX	136875637	136875638	135957796		1																			1
chrX	137848478	137848479	136930637																								1																			1
chrX	139073842	139073843	138156004								1																																						0
chrX	143669433	143669434	142752509
chrX	144290765	144290766	143373892
chrX	145192207	145192208	144273727
chrX	154483727	154483728	153712066															1			1
chrX	6964100	6964101	6882141											1												1											0
chrX	7636191	7636192	7554232																																														1
chrX	12901390	12901391	12919509																			0			0												0
chrX	16772411	16772412	16790534
chrX	17736311	17736312	17754431									1
chrX	19252810	19252811	19270928						1
chrX	21657869	21657870	21675987							1																																							1
chrX	25674905	25674906	25693022
chrX	27863961	27863962	27882078																																											1
chrX	31227234	31227235	31245351
chrX	36399745	36399746	36417860
chrX	36696018	36696019	36714091
chrX	39895539	39895540	39754793																											1		1
chrX	40544450	40544451	40403702
chrX	41344350	41344351	41203603																																				1
chrX	42143475	42143476	42002728
chrX	43053369	43053370	42912618																							1
chrX	47630340	47630341	47489739
chrX	48831042	48831043	48689452															0
chrX	52299217	52299218	52042361				0
chrX	53000873	53000874	53030052			1	1
chrX	53351493	53351494	53378401
chrX	53914543	53914544	53940973																																								0
chrX	54480853	54480854	54507286
chrX	54831653	54831654	54858086																									1																			0
chrX	55246071	55246072	55272504
chrX	55314266	55314267	55340699				1								1							1
chrX	55328114	55328115	55354547
chrX	57052740	57052741	57079173																				0		0											0
chrX	57559425	57559426	57585858
chrX	57651318	57651319	57677751																	1																								1
chrX	57947402	57947403	57973836
chrX	57963225	57963226	57989659																												1
chrX	57981105	57981106	58007539
chrX	58035216	58035217	58061650
chrX	58110684	58110685	58137118			0
chrX	58152916	58152917	58179350
chrX	58202156	58202157	58228590			0																						1						1										1					1
chrX	58210576	58210577	58237010																																											1
chrX	58230027	58230028	58256461																																								0
chrX	58240405	58240406	58266839
chrX	58325404	58325405	58351837									0		0
chrX	58339509	58339510	58365942	1								1																			0
chrX	58352787	58352788	58379220																												1
chrX	58389517	58389518	58415950	1			0		1
chrX	58389932	58389933	58416365	0																						0
chrX	58400827	58400828	58427260															1			0
chrX	58409688	58409689	58436121
chrX	58420951	58420952	58447384													1
chrX	58514048	58514049	58540481		1																																								1
chrX	62463990	62463991	61683460																																		1					0						1
chrX	62516993	62516994	61736463											0
chrX	62555816	62555817	61775286																																	1									1
chrX	62713754	62713755	61933224													0
chrX	62778444	62778445	61997914
chrX	62795701	62795702	62015171								1																															0
chrX	62834338	62834339	62053808
chrX	62959518	62959519	62178988																													1
chrX	65408556	65408557	64628436																		0
chrX	66409267	66409268	65629109																																				1
chrX	66804210	66804211	66024052																								1															1
chrX	67891971	67891972	67111813															1																													1
chrX	69136683	69136684	68356526
chrX	70756114	70756115	69975964																														1							1		1
chrX	71053349	71053350	70273199
chrX	71287774	71287775	70507624
chrX	71544618	71544619	70764468
chrX	71836350	71836351	71056200
chrX	75976796	75976797	75196631															1
chrX	76617569	76617570	75837972																															0
chrX	77045541	77045542	76265966
chrX	77129734	77129735	76350153											1																						1
chrX	77268568	77268569	76489031																				0
chrX	77494379	77494380	76749857																		0																							0
chrX	84598220	84598221	83853228			1	1								1																															1
chrX	86048219	86048220	85303223																												1
chrX	98408963	98408964	97663961																						1
chrX	99939352	99939353	99194350														1
chrX	99939356	99939357	99194354														1
chrX	99939424	99939425	99194422														1														1					1													0
chrX	100809446	100809447	100064435																											0
chrX	104282108	104282109	103526789			1																			0						0
chrX	104309335	104309336	103554016
chrX	105820414	105820415	105064407																									0
chrX	107155931	107155932	106399161
chrX	111367060	111367061	110610288															0
chrX	112639133	112639134	111882361																						1
chrX	117831089	117831090	116965052
chrX	118017990	118017991	117151953
chrX	118827553	118827554	117961516
chrX	119994910	119994911	119128873																																						1
chrX	119998281	119998282	119132244						1																					0								0
chrX	126552252	126552253	125686235																					1							1
chrX	129933547	129933548	129067523
chrX	130401270	130401271	129535244						0																			0
chrX	133655308	133655309	132789336													1
chrX	134874316	134874317	134008346																								1																	0
chrX	136198864	136198865	135281023	1																																		1
chrX	136571322	136571323	135653481																																								1
chrX	141826176	141826177	140913962
chrX	145845861	145845862	144927379																1							1		1															1	1
chrX	150558958	150558959	149727411																									1
chrX	150571114	150571115	149739564
chrX	152486926	152486927	151655398
chrX	154751609	154751610	153979884																																		0
chrX	155057737	155057738	154286012			0																																		0	0
chrX	4381639	4381640	4299680
chrX	6279912	6279913	6197953
chrX	7876094	7876095	7844135																																							1
chrX	9878523	9878524	9846563																		1				0
chrX	12692017	12692018	12710136
chrX	27863876	27863877	27881993
chrX	28732110	28732111	28750227														1
chrX	29927651	29927652	29945768
chrX	47205964	47205965	47065363		0				1
chrX	52923774	52923775	52952965															1
chrX	58445428	58445429	58471861	1									1																			1
chrX	62986163	62986164	62205633
chrX	73447193	73447194	72667029				1								1																		0															0
chrX	73449539	73449540	72669375																					1										0
chrX	76550458	76550459	75770851
chrX	77902687	77902688	77158184													0
chrX	83578830	83578831	82833838		0															0
chrX	101410275	101410276	100665263
chrX	119786551	119786552	118920514
chrX	120029559	120029560	119163524																																							0
chrX	123192650	123192651	122326502																										1
chrX	129428853	129428854	128562830																																		1
chrX	134636939	134636940	133770969							0																																							1
chrX	149161357	149161358	148242887																																	1				1
chrX	150329503	150329504	149497751	1																																	1
chrX	3798821	3798822	3716862																																				0
chrX	6057283	6057284	5975324
chrX	6105047	6105048	6023088		1
chrX	6149157	6149158	6067198
chrX	7359097	7359098	7277138			1								1																					1
chrX	9055224	9055225	9023265																1
chrX	9700749	9700750	9668789																				1												1											1
chrX	9890620	9890621	9858660
chrX	10223175	10223176	10191215																															0
chrX	10604989	10604990	10573029			0
chrX	11419243	11419244	11437363				1
chrX	12901507	12901508	12919626											1		1						1
chrX	13143356	13143357	13161475																		1											1
chrX	16949171	16949172	16967294																			1							0
chrX	17053869	17053870	17071992																		0
chrX	23902842	23902843	23920959																															1
chrX	24053849	24053850	24071966
chrX	28177401	28177402	28195518					0																																									1
chrX	29243065	29243066	29261182
chrX	30120802	30120803	30138919
chrX	30386332	30386333	30404449
chrX	31117576	31117577	31135693																																											0
chrX	36985149	36985150	37003222																								0
chrX	38304230	38304231	38163483						1																		1
chrX	40005997	40005998	39865250
chrX	41521174	41521175	41380427											1																															1
chrX	47191821	47191822	47051220								0																																	1				0
[truncated: 29,611 more rows]
[truncated: 5,000 more columns]
