# Supplementary material for: Human brain ancestral barcodes
Source: eLife. 2025 Jun 10;13:RP101163. doi: 10.7554/eLife.101163 (PMC12151537; doi:10.7554/eLife.101163)
Supplement: Supplementary file 6. [file elife-101163-supp6.xlsx]

## Sheet: for whole brain trees
	H01_ID	array	Region	cortex	MT	H01				H02_ID	array	Region	cortex	MT	H02			H04_ID	array	Region	cortex	MT	H04
	ROOT									ROOT								ROOT
	223	A1	CA1R	HIP	CA	GSM6009309				8	A1	A5-A7	PC	Vip	GSM5421668			57	A1	MTG	TC	Vip	GSM6334480
	299	A1	CA1R	HIP	DG	GSM6009656				13	A1	A5-A7	PC	Sncg	GSM5421703			11	A1	MTG	TC	Vip	GSM6333586
	155	A1	CA1R	HIP	DG	GSM6009469				34	A1	A5-A7	PC	Sst	GSM5421885			8	A1	MTG	TC	Vip	GSM6333569
	255	A1	CA1R	HIP	DG	GSM6009688				35	A1	A5-A7	PC	Pvalb	GSM5421888			87	A1	MTG	TC	Vip	GSM6335532
	252	A1	CA1R	HIP	DG	GSM6009288				40	A1	A5-A7	PC	Pvalb	GSM5421925			92	A1	MTG	TC	Vip	GSM6335564
	235	A1	CA1R	HIP	DG	GSM6009673				41	A1	A5-A7	PC	Sst	GSM5421926			121	A1	MTG	TC	Vip	GSM6335809
	280	A1	CA1R	HIP	DG	GSM6009492				43	A1	A5-A7	PC	Vip	GSM5421937			141	A1	MTG	TC	Sst	GSM6336208
	256	A1	CA1R	HIP	DG	GSM6009131				48	A1	A5-A7	PC	Sncg	GSM5421986			135	A1	MTG	TC	Sst	GSM6336184
	254	A1	CA1R	HIP	DG	GSM6009126				53	A1	A5-A7	PC	Vip	GSM5422033			5	A1	MTG	TC	Sst	GSM6333557
	236	A1	CA1R	HIP	DG	GSM6009264				57	A1	A5-A7	PC	Lamp5	GSM5422051			155	A1	MTG	TC	Sst	GSM6336299
	270	A1	CA1R	HIP	DG	GSM6009322				58	A1	A5-A7	PC	Sst	GSM5422071			170	A1	MTG	TC	Sst	GSM6336381
	273	A1	CA1R	HIP	DG	GSM6009409				62	A1	A5-A7	PC	Vip	GSM5422079			131	A1	MTG	TC	Sst	GSM6336167
	244	A1	CA1R	HIP	DG	GSM6009118				64	A1	A5-A7	PC	Sst	GSM5422086			7	A1	MTG	TC	Sst	GSM6333563
	249	A1	CA1R	HIP	DG	GSM6009709				67	A1	A5-A7	PC	Sncg	GSM5422096			138	A1	MTG	TC	Sncg	GSM6336198
	225	A1	CA1R	HIP	DG	GSM6009287				72	A1	A5-A7	PC	Sst	GSM5422114			79	A1	MTG	TC	Sncg	GSM6335446
	260	A1	CA1R	HIP	DG	GSM6009694				74	A1	A5-A7	PC	Pvalb	GSM5422116			128	A1	MTG	TC	Sncg	GSM6336009
	232	A1	CA1R	HIP	DG	GSM6009294				75	A1	A5-A7	PC	Lamp5	GSM5422117			132	A1	MTG	TC	Sncg	GSM6336169
	241	A1	CA1R	HIP	DG	GSM6009266				97	A1	A5-A7	PC	Vip	GSM5422198			125	A1	MTG	TC	Sncg	GSM6335939
	268	A1	CA1R	HIP	DG	GSM6009450				100	A1	A5-A7	PC	Lamp5	GSM5422231			134	A1	MTG	TC	Pvalb	GSM6336172
	287	A1	CA1R	HIP	DG	GSM6009690				108	A1	A5-A7	PC	Pvalb	GSM5422271			150	A1	MTG	TC	Pvalb	GSM6336265
	246	A1	CA1R	HIP	DG	GSM6009123				109	A1	A5-A7	PC	Sst	GSM5422272			88	A1	MTG	TC	Pvalb	GSM6335533
	239	A1	CA1R	HIP	DG	GSM6009482				113	A1	A5-A7	PC	Lamp5	GSM5422280			24	A1	MTG	TC	Pvalb	GSM6333704
	293	A1	CA1R	HIP	DG	GSM6009139				116	A1	A5-A7	PC	Sncg	GSM5422286			190	A1	MTG	TC	ODC	GSM6335362
	1354	A3	CA1C	HIP	CA	GSM6157394				118	A1	A5-A7	PC	Vip	GSM5422292			202	A1	MTG	TC	ODC	GSM6336506
	1434	A3	CA1C	HIP	DG	GSM6160026				119	A1	A5-A7	PC	Lamp5	GSM5422293			199	A1	MTG	TC	OPC	GSM6336197
	1424	A3	CA1C	HIP	DG	GSM6158233				121	A1	A5-A7	PC	Sncg	GSM5422302			186	A1	MTG	TC	ODC	GSM6334276
	1425	A3	CA1C	HIP	DG	GSM6158608				124	A1	A5-A7	PC	Pvalb	GSM5422328			86	A1	MTG	TC	Lamp5	GSM6335529
	1432	A3	CA1C	HIP	DG	GSM6159880				125	A1	A5-A7	PC	Pvalb	GSM5422333			136	A1	MTG	TC	Lamp5	GSM6336185
	1576	A4	A44-A45	FC	Lamp5	GSM7297898				126	A1	A5-A7	PC	Vip	GSM5422334			55	A1	MTG	TC	Lamp5	GSM6334443
	1575	A4	A44-A45	FC	Lamp5	GSM7297774				128	A1	A5-A7	PC	Pvalb	GSM5422342			78	A1	MTG	TC	Lamp5	GSM6335444
	1574	A4	A44-A45	FC	Lamp5	GSM7297719				132	A1	A5-A7	PC	Lamp5	GSM5422362			149	A1	MTG	TC	Lamp5	GSM6336256
	1573	A4	A44-A45	FC	Lamp5	GSM7297605				133	A1	A5-A7	PC	Lamp5	GSM5422381			45	A1	MTG	TC	Lamp5	GSM6334162
	1584	A4	A44-A45	FC	Lamp5	GSM7297726				134	A1	A5-A7	PC	Sst	GSM5422382			331	A1	MTG	TC	L4_6	GSM6335241
	1766	A4	A44-A45	FC	Vip	GSM7297797				136	A1	A5-A7	PC	Pvalb	GSM5422386			254	A1	MTG	TC	L4_6	GSM6333832
	1761	A4	A44-A45	FC	Vip	GSM7297771				139	A1	A5-A7	PC	Lamp5	GSM5422397			242	A1	MTG	TC	L4_6	GSM6333679
	1757	A4	A44-A45	FC	Vip	GSM7297740				140	A1	A5-A7	PC	Vip	GSM5422401			465	A1	MTG	TC	L4_6	GSM6336317
	1772	A4	A44-A45	FC	Vip	GSM7297854				141	A1	A5-A7	PC	Sst	GSM5422404			322	A1	MTG	TC	L4_6	GSM6334852
	1759	A4	A44-A45	FC	Vip	GSM7297752				146	A1	A5-A7	PC	ODC	GSM5421793			323	A1	MTG	TC	L4_6	GSM6334885
	1701	A4	A44-A45	FC	Sst	GSM7297779				147	A1	A5-A7	PC	OPC	GSM5421795			291	A1	MTG	TC	L4_6	GSM6334152
	1680	A4	A44-A45	FC	Sst	GSM7297373				148	A1	A5-A7	PC	ASC	GSM5421802			431	A1	MTG	TC	L4_6	GSM6336175
	1714	A4	A44-A45	FC	Sst	GSM7297901				149	A1	A5-A7	PC	ODC	GSM5421813			409	A1	MTG	TC	L4_6	GSM6335826
	1722	A4	A44-A45	FC	Sst	GSM7298619				150	A1	A5-A7	PC	ASC	GSM5421859			211	A1	MTG	TC	L4_6	GSM6333561
	1676	A4	A44-A45	FC	Sst	GSM7297116				151	A1	A5-A7	PC	ASC	GSM5421893			372	A1	MTG	TC	L4_6	GSM6335572
	1612	A4	A44-A45	FC	Pvalb	GSM7297721				152	A1	A5-A7	PC	ASC	GSM5422078			319	A1	MTG	TC	L4_6	GSM6334564
	1613	A4	A44-A45	FC	Pvalb	GSM7297727				153	A1	A5-A7	PC	ASC	GSM5422157			222	A1	MTG	TC	L4_6	GSM6333602
	1605	A4	A44-A45	FC	Pvalb	GSM7297583				154	A1	A5-A7	PC	ODC	GSM5422223			361	A1	MTG	TC	L4_6	GSM6335541
	1619	A4	A44-A45	FC	Pvalb	GSM7297793				155	A1	A5-A7	PC	ASC	GSM5422378			438	A1	MTG	TC	L4_6	GSM6336192
	1593	A4	A44-A45	FC	Pvalb	GSM7296945				156	A1	A5-A7	PC	ASC	GSM5422403			213	A1	MTG	TC	L4_6	GSM6333565
	2044	A4	A44-A45	FC	L4_6	GSM7296942				224	A1	A5-A7	PC	L4_6	GSM5421808			214	A1	MTG	TC	L4_6	GSM6333568
	2045	A4	A44-A45	FC	L4_6	GSM7297312				251	A1	A5-A7	PC	L4_6	GSM5421929			208	A1	MTG	TC	L4_6	GSM6333552
	2001	A4	A44-A45	FC	L4_6	GSM7297763				253	A1	A5-A7	PC	L2/3-IT	GSM5421933			444	A1	MTG	TC	L4_6	GSM6336228
	1969	A4	A44-A45	FC	L4_6	GSM7297875				276	A1	A5-A7	PC	L4_6	GSM5422017			266	A1	MTG	TC	L4_6	GSM6333985
	2013	A4	A44-A45	FC	L4_6	GSM7297888				279	A1	A5-A7	PC	L4_6	GSM5422022			312	A1	MTG	TC	L4_6	GSM6334437
	2041	A4	A44-A45	FC	L4_6	GSM7297762				287	A1	A5-A7	PC	L2/3-IT	GSM5422034			299	A1	MTG	TC	L4_6	GSM6334184
	1999	A4	A44-A45	FC	L4_6	GSM7297730				293	A1	A5-A7	PC	L2/3-IT	GSM5422044			456	A1	MTG	TC	L4_6	GSM6336272
	2049	A4	A44-A45	FC	L4_6	GSM7297792				296	A1	A5-A7	PC	L4_6	GSM5422048			424	A1	MTG	TC	L4_6	GSM6336153
	2038	A4	A44-A45	FC	L4_6	GSM7297577				300	A1	A5-A7	PC	L4_6	GSM5422054			419	A1	MTG	TC	L4_6	GSM6336000
	1996	A4	A44-A45	FC	L4_6	GSM7297625				301	A1	A5-A7	PC	L4_6	GSM5422055			440	A1	MTG	TC	L2/3-IT	GSM6336203
	2009	A4	A44-A45	FC	L4_6	GSM7297868				306	A1	A5-A7	PC	L2/3-IT	GSM5422063			383	A1	MTG	TC	L2/3-IT	GSM6335628
	1946	A4	A44-A45	FC	L4_6	GSM7297126				315	A1	A5-A7	PC	L2/3-IT	GSM5422077			388	A1	MTG	TC	L2/3-IT	GSM6335665
	1965	A4	A44-A45	FC	L4_6	GSM7297781				319	A1	A5-A7	PC	L2/3-IT	GSM5422089			258	A1	MTG	TC	L2/3-IT	GSM6333865
	2028	A4	A44-A45	FC	L4_6	GSM7297869				321	A1	A5-A7	PC	L2/3-IT	GSM5422092			439	A1	MTG	TC	L2/3-IT	GSM6336193
	2011	A4	A44-A45	FC	L4_6	GSM7297881				323	A1	A5-A7	PC	L2/3-IT	GSM5422097			366	A1	MTG	TC	L2/3-IT	GSM6335560
	1966	A4	A44-A45	FC	L4_6	GSM7297783				339	A1	A5-A7	PC	L4_6	GSM5422134			303	A1	MTG	TC	L2/3-IT	GSM6334236
	2025	A4	A44-A45	FC	L4_6	GSM7297748				342	A1	A5-A7	PC	L2/3-IT	GSM5422139			442	A1	MTG	TC	L2/3-IT	GSM6336205
	1962	A4	A44-A45	FC	L4_6	GSM7297714				343	A1	A5-A7	PC	L4_6	GSM5422140			458	A1	MTG	TC	L2/3-IT	GSM6336279
	1897	A4	A44-A45	FC	L2/3-IT	GSM7297759				352	A1	A5-A7	PC	L2/3-IT	GSM5422158			342	A1	MTG	TC	L2/3-IT	GSM6335413
	1895	A4	A44-A45	FC	L2/3-IT	GSM7297755				356	A1	A5-A7	PC	L4_6	GSM5422166			360	A1	MTG	TC	L2/3-IT	GSM6335540
	1901	A4	A44-A45	FC	L2/3-IT	GSM7297786				357	A1	A5-A7	PC	L4_6	GSM5422168			224	A1	MTG	TC	L2/3-IT	GSM6333611
	1902	A4	A44-A45	FC	L2/3-IT	GSM7297787				366	A1	A5-A7	PC	L4_6	GSM5422184			234	A1	MTG	TC	L2/3-IT	GSM6333639
	1914	A4	A44-A45	FC	L2/3-IT	GSM7297877				374	A1	A5-A7	PC	L2/3-IT	GSM5422195			469	A1	MTG	TC	L2/3-IT	GSM6336366
	1879	A4	A44-A45	FC	L2/3-IT	GSM7297603				378	A1	A5-A7	PC	L2/3-IT	GSM5422202			229	A1	MTG	TC	L2/3-IT	GSM6333628
	1916	A4	A44-A45	FC	L2/3-IT	GSM7297879				379	A1	A5-A7	PC	L4_6	GSM5422203			260	A1	MTG	TC	L2/3-IT	GSM6333873
	1856	A4	A44-A45	FC	L2/3-IT	GSM7297182				384	A1	A5-A7	PC	L4_6	GSM5422209			434	A1	MTG	TC	L2/3-IT	GSM6336180
	1905	A4	A44-A45	FC	L2/3-IT	GSM7297794				390	A1	A5-A7	PC	L2/3-IT	GSM5422216			367	A1	MTG	TC	L2/3-IT	GSM6335561
	1919	A4	A44-A45	FC	L2/3-IT	GSM7297892				393	A1	A5-A7	PC	L4_6	GSM5422222			215	A1	MTG	TC	L2/3-IT	GSM6333572
	1899	A4	A44-A45	FC	L2/3-IT	GSM7297765				395	A1	A5-A7	PC	L2/3-IT	GSM5422228			427	A1	MTG	TC	L2/3-IT	GSM6336162
	1843	A4	A44-A45	FC	L2/3-IT	GSM7297045				401	A1	A5-A7	PC	L4_6	GSM5422235			463	A1	MTG	TC	L2/3-IT	GSM6336304
	1886	A4	A44-A45	FC	L2/3-IT	GSM7297640				404	A1	A5-A7	PC	L2/3-IT	GSM5422238			244	A1	MTG	TC	L2/3-IT	GSM6333686
	1917	A4	A44-A45	FC	L2/3-IT	GSM7297882				411	A1	A5-A7	PC	L2/3-IT	GSM5422252			337	A1	MTG	TC	L2/3-IT	GSM6335325
	1903	A4	A44-A45	FC	L2/3-IT	GSM7297789				413	A1	A5-A7	PC	L4_6	GSM5422254			276	A1	MTG	TC	L2/3-IT	GSM6334032
	1876	A4	A44-A45	FC	L2/3-IT	GSM7297591				418	A1	A5-A7	PC	L4_6	GSM5422263			290	A1	MTG	TC	L2/3-IT	GSM6334140
	1852	A4	A44-A45	FC	L2/3-IT	GSM7297125				419	A1	A5-A7	PC	L4_6	GSM5422266			493	A2	A5-A7	PC	Vip	GSM6351719
	1918	A4	A44-A45	FC	L2/3-IT	GSM7297889				422	A1	A5-A7	PC	L4_6	GSM5422270			501	A2	A5-A7	PC	Vip	GSM6351810
	1792	A4	A44-A45	FC	ASC	GSM7299288				424	A1	A5-A7	PC	L2/3-IT	GSM5422276			523	A2	A5-A7	PC	Vip	GSM6352242
	1793	A4	A44-A45	FC	ASC	GSM7299558				425	A1	A5-A7	PC	L2/3-IT	GSM5422277			545	A2	A5-A7	PC	Vip	GSM6352837
	1821	A4	A44-A45	FC	OPC	GSM7299372				428	A1	A5-A7	PC	L2/3-IT	GSM5422289			532	A2	A5-A7	PC	Vip	GSM6352721
	1820	A4	A44-A45	FC	OPC	GSM7298343				430	A1	A5-A7	PC	L4_6	GSM5422291			527	A2	A5-A7	PC	Vip	GSM6352483
	1816	A4	A44-A45	FC	OPC	GSM7297716				432	A1	A5-A7	PC	L4_6	GSM5422299			595	A2	A5-A7	PC	Vip	GSM6354058
	1813	A4	A44-A45	FC	ODC	GSM7299416				433	A1	A5-A7	PC	L2/3-IT	GSM5422300			598	A2	A5-A7	PC	Sst	GSM6354146
	1801	A4	A44-A45	FC	ODC	GSM7297176				434	A1	A5-A7	PC	L2/3-IT	GSM5422301			544	A2	A5-A7	PC	Sst	GSM6352834
	1807	A4	A44-A45	FC	ODC	GSM7297709				438	A1	A5-A7	PC	L4_6	GSM5422307			515	A2	A5-A7	PC	Sst	GSM6352012
	2230	B1	CA1C	HIP	CA	GSM5888207				442	A1	A5-A7	PC	L2/3-IT	GSM5422316			533	A2	A5-A7	PC	Sst	GSM6352723
	2229	B1	CA1C	HIP	CA	GSM5887761				447	A1	A5-A7	PC	L2/3-IT	GSM5422324			546	A2	A5-A7	PC	Sst	GSM6352842
	2228	B1	CA1C	HIP	CA	GSM5887755				450	A1	A5-A7	PC	L2/3-IT	GSM5422331			563	A2	A5-A7	PC	Sst	GSM6353032
	2222	B1	CA1C	HIP	CA	GSM5887671				451	A1	A5-A7	PC	L2/3-IT	GSM5422332			600	A2	A5-A7	PC	Sst	GSM6354275
	2226	B1	CA1C	HIP	CA	GSM5887728				462	A1	A5-A7	PC	L2/3-IT	GSM5422351			496	A2	A5-A7	PC	Sst	GSM6351773
	2224	B1	CA1C	HIP	CA	GSM5887700				468	A1	A5-A7	PC	L2/3-IT	GSM5422365			601	A2	A5-A7	PC	Sncg	GSM6354293
	2223	B1	CA1C	HIP	CA	GSM5887676				469	A1	A5-A7	PC	L4_6	GSM5422366			483	A2	A5-A7	PC	Pvalb	GSM6351663
	2227	B1	CA1C	HIP	CA	GSM5887737				472	A1	A5-A7	PC	L2/3-IT	GSM5422372			487	A2	A5-A7	PC	Pvalb	GSM6351680
	2273	B1	CA1C	HIP	DG	GSM5887091				473	A1	A5-A7	PC	L4_6	GSM5422373			624	A2	A5-A7	PC	ODC	GSM6353022
	2262	B1	CA1C	HIP	DG	GSM5886669				476	A1	A5-A7	PC	L4_6	GSM5422380			632	A2	A5-A7	PC	ODC	GSM6353049
	2267	B1	CA1C	HIP	DG	GSM5886888				477	A1	A5-A7	PC	L4_6	GSM5422383			617	A2	A5-A7	PC	ASC	GSM6352328
	2315	B1	CA1C	HIP	DG	GSM5887779				479	A1	A5-A7	PC	L2/3-IT	GSM5422388			622	A2	A5-A7	PC	ODC	GSM6353006
	2308	B1	CA1C	HIP	DG	GSM5887723				481	A1	A5-A7	PC	L4_6	GSM5422391			611	A2	A5-A7	PC	ODC	GSM6351923
	2317	B1	CA1C	HIP	DG	GSM5887792				487	A1	A5-A7	PC	L2/3-IT	GSM5422400			631	A2	A5-A7	PC	ODC	GSM6353046
	2304	B1	CA1C	HIP	DG	GSM5887668				489	A1	A5-A7	PC	L4_6	GSM5422405			645	A2	A5-A7	PC	ODC	GSM6354551
	2305	B1	CA1C	HIP	DG	GSM5887693				494	A1	A5-A7	PC	L4_6	GSM5422413			612	A2	A5-A7	PC	ASC	GSM6351926
	2309	B1	CA1C	HIP	DG	GSM5887726				496	A2	ITG	TC	Sst	GSM6167648			542	A2	A5-A7	PC	Lamp5	GSM6352818
	2295	B1	CA1C	HIP	DG	GSM5887566				518	A2	ITG	TC	Vip	GSM6167852			561	A2	A5-A7	PC	Lamp5	GSM6353016
	2312	B1	CA1C	HIP	DG	GSM5887771				530	A2	ITG	TC	Pvalb	GSM6167918			562	A2	A5-A7	PC	Lamp5	GSM6353017
	2293	B1	CA1C	HIP	DG	GSM5887558				596	A2	ITG	TC	Sncg	GSM6168408			667	A2	A5-A7	PC	L4_6	GSM6351674
	2292	B1	CA1C	HIP	DG	GSM5887554				611	A2	ITG	TC	Sst	GSM6168506			919	A2	A5-A7	PC	L4_6	GSM6353989
	2311	B1	CA1C	HIP	DG	GSM5887765				659	A2	ITG	TC	Lamp5	GSM6169181			683	A2	A5-A7	PC	L4_6	GSM6351722
	2245	B1	CA1C	HIP	DG	GSM5886232				664	A2	ITG	TC	Vip	GSM6169521			952	A2	A5-A7	PC	L4_6	GSM6354391
	2314	B1	CA1C	HIP	DG	GSM5887774				703	A2	ITG	TC	ODC	GSM6167969			820	A2	A5-A7	PC	L4_6	GSM6352861
	2306	B1	CA1C	HIP	DG	GSM5887694				712	A2	ITG	TC	ODC	GSM6167997			906	A2	A5-A7	PC	L4_6	GSM6353899
	2290	B1	CA1C	HIP	DG	GSM5887469				715	A2	ITG	TC	ODC	GSM6168112			850	A2	A5-A7	PC	L4_6	GSM6353051
	2298	B1	CA1C	HIP	DG	GSM5887613				793	A2	ITG	TC	L4_6	GSM6167791			696	A2	A5-A7	PC	L4_6	GSM6351842
	2294	B1	CA1C	HIP	DG	GSM5887564				863	A2	ITG	TC	L2/3-IT	GSM6168192			798	A2	A5-A7	PC	L4_6	GSM6352749
	2318	B1	CA1C	HIP	DG	GSM5887828				895	A2	ITG	TC	L2/3-IT	GSM6168284			832	A2	A5-A7	PC	L4_6	GSM6352899
	2968	B2	MD	BS	THM	GSM6028099				916	A2	ITG	TC	L2/3-IT	GSM6168391			810	A2	A5-A7	PC	L4_6	GSM6352839
	2611	B2	MD	BS	THM	GSM6027441				919	A2	ITG	TC	L2/3-IT	GSM6168396			833	A2	A5-A7	PC	L4_6	GSM6352900
	2823	B2	MD	BS	THM	GSM6027822				920	A2	ITG	TC	L4_6	GSM6168397			844	A2	A5-A7	PC	L4_6	GSM6352932
	2768	B2	MD	BS	THM	GSM6027702				1020	A2	ITG	TC	L2/3-IT	GSM6168871			799	A2	A5-A7	PC	L4_6	GSM6352752
	2778	B2	MD	BS	THM	GSM6027717				1021	A2	ITG	TC	L2/3-IT	GSM6168873			706	A2	A5-A7	PC	L4_6	GSM6351868
	2822	B2	MD	BS	THM	GSM6027817				1022	A2	ITG	TC	L2/3-IT	GSM6168903			834	A2	A5-A7	PC	L4_6	GSM6352901
	2767	B2	MD	BS	THM	GSM6027701				1027	A2	ITG	TC	L4_6	GSM6169176			828	A2	A5-A7	PC	L4_6	GSM6352889
	2906	B2	MD	BS	THM	GSM6027991				1028	A2	ITG	TC	L2/3-IT	GSM6169219			704	A2	A5-A7	PC	L4_6	GSM6351861
	2598	B2	MD	BS	THM	GSM6028010				1055	A2	ITG	TC	L4_6	GSM6169723			673	A2	A5-A7	PC	L4_6	GSM6351683
	2765	B2	MD	BS	THM	GSM6027699				1095	A3	MD	BS	THM	GSM6191461			839	A2	A5-A7	PC	L4_6	GSM6352914
	2727	B2	MD	BS	THM	GSM6027640				1096	A3	MD	BS	ODC	GSM6191484			831	A2	A5-A7	PC	L4_6	GSM6352897
	2788	B2	MD	BS	THM	GSM6027732				1156	A3	MD	BS	THM	GSM6191613			835	A2	A5-A7	PC	L4_6	GSM6352906
	2952	B2	MD	BS	THM	GSM6028068				1159	A3	MD	BS	THM	GSM6191616			797	A2	A5-A7	PC	L4_6	GSM6352747
	2638	B2	MD	BS	THM	GSM6027498				1165	A3	MD	BS	THM	GSM6191622			793	A2	A5-A7	PC	L4_6	GSM6352719
	2983	B2	MD	BS	THM	GSM6028127				1167	A3	MD	BS	THM	GSM6191624			669	A2	A5-A7	PC	L4_6	GSM6351677
	2796	B2	MD	BS	THM	GSM6027751				1168	A3	MD	BS	THM	GSM6191625			809	A2	A5-A7	PC	L4_6	GSM6352833
	2808	B2	MD	BS	THM	GSM6027780				1175	A3	MD	BS	THM	GSM6191634			732	A2	A5-A7	PC	L4_6	GSM6352014
	2681	B2	MD	BS	THM	GSM6027572				1179	A3	MD	BS	THM	GSM6191638			753	A2	A5-A7	PC	L4_6	GSM6352126
	2962	B2	MD	BS	THM	GSM6028088				1180	A3	MD	BS	THM	GSM6191639			926	A2	A5-A7	PC	L4_6	GSM6354016
	2776	B2	MD	BS	THM	GSM6027713				1181	A3	MD	BS	THM	GSM6191641			803	A2	A5-A7	PC	L4_6	GSM6352814
	2777	B2	MD	BS	THM	GSM6027714				1182	A3	MD	BS	THM	GSM6191642			899	A2	A5-A7	PC	L4_6	GSM6353854
	2709	B2	MD	BS	THM	GSM6027617				1184	A3	MD	BS	THM	GSM6191644			786	A2	A5-A7	PC	L2/3-IT	GSM6352699
	2935	B2	MD	BS	THM	GSM6028037				1185	A3	MD	BS	THM	GSM6191645			767	A2	A5-A7	PC	L2/3-IT	GSM6352340
	2597	B2	MD	BS	THM	GSM6028004				1187	A3	MD	BS	THM	GSM6191647			886	A2	A5-A7	PC	L2/3-IT	GSM6353458
	2757	B2	MD	BS	THM	GSM6027689				1189	A3	MD	BS	THM	GSM6191649			758	A2	A5-A7	PC	L2/3-IT	GSM6352174
	2556	B2	MD	BS	Lamp5	GSM6028009				1190	A3	MD	BS	THM	GSM6191650			802	A2	A5-A7	PC	L2/3-IT	GSM6352808
	2553	B2	MD	BS	Lamp5	GSM6027898				1193	A3	MD	BS	ODC	GSM6191653			829	A2	A5-A7	PC	L2/3-IT	GSM6352890
	2557	B2	MD	BS	Lamp5	GSM6028025				1194	A3	MD	BS	THM	GSM6191654			815	A2	A5-A7	PC	L2/3-IT	GSM6352847
	2559	B2	MD	BS	Lamp5	GSM6028112				1195	A3	MD	BS	ASC	GSM6191655			765	A2	A5-A7	PC	L2/3-IT	GSM6352235
	2549	B2	MD	BS	Lamp5	GSM6027507				1196	A3	MD	BS	THM	GSM6191656			818	A2	A5-A7	PC	L2/3-IT	GSM6352857
	2555	B2	MD	BS	Lamp5	GSM6027958				1197	A3	MD	BS	THM	GSM6191657			807	A2	A5-A7	PC	L2/3-IT	GSM6352828
	2551	B2	MD	BS	Lamp5	GSM6027716				1198	A3	MD	BS	THM	GSM6191658			841	A2	A5-A7	PC	L2/3-IT	GSM6352925
	2550	B2	MD	BS	Lamp5	GSM6027679				1199	A3	MD	BS	THM	GSM6191659			846	A2	A5-A7	PC	L2/3-IT	GSM6353013
	2996	B2	MD	BS	ASC	GSM6027761				1205	A3	MD	BS	THM	GSM6191665			822	A2	A5-A7	PC	L2/3-IT	GSM6352866
	2997	B2	MD	BS	ASC	GSM6027770				1207	A3	MD	BS	THM	GSM6191667			824	A2	A5-A7	PC	L2/3-IT	GSM6352878
	2995	B2	MD	BS	ASC	GSM6027757				1212	A3	MD	BS	ASC	GSM6191673			888	A2	A5-A7	PC	L2/3-IT	GSM6353553
	3054	B2	MD	BS	OPC	GSM6028134				1214	A3	MD	BS	OPC	GSM6191695			805	A2	A5-A7	PC	L2/3-IT	GSM6352820
	3053	B2	MD	BS	OPC	GSM6027659				1230	A3	MD	BS	ASC	GSM6191754			821	A2	A5-A7	PC	L2/3-IT	GSM6352862
	3055	B2	MD	BS	OPC	GSM6028138				1334	A3	MD	BS	THM	GSM6192079			690	A2	A5-A7	PC	L2/3-IT	GSM6351765
	3040	B2	MD	BS	ODC	GSM6028049				1364	A3	MD	BS	THM	GSM6192174			811	A2	A5-A7	PC	L2/3-IT	GSM6352840
	3039	B2	MD	BS	ODC	GSM6028034				1421	A4	CBL	cere	CB	GSM6304919			842	A2	A5-A7	PC	L2/3-IT	GSM6352927
	3022	B2	MD	BS	ODC	GSM6027781				1425	A4	CBL	cere	CB	GSM6304952			699	A2	A5-A7	PC	L2/3-IT	GSM6351847
	3014	B2	MD	BS	ODC	GSM6027762				1529	A4	CBL	cere	CB	GSM6305352			847	A2	A5-A7	PC	L2/3-IT	GSM6353029
	3030	B2	MD	BS	ODC	GSM6027826				1530	A4	CBL	cere	CB	GSM6305356			785	A2	A5-A7	PC	L2/3-IT	GSM6352599
	3028	B2	MD	BS	ODC	GSM6027796				1532	A4	CBL	cere	CB	GSM6305360			830	A2	A5-A7	PC	L2/3-IT	GSM6352895
	3023	B2	MD	BS	ODC	GSM6027782				1533	A4	CBL	cere	CB	GSM6305363			934	A2	A5-A7	PC	L2/3-IT	GSM6354062
	3047	B2	MD	BS	ODC	GSM6028133				1534	A4	CBL	cere	CB	GSM6305366			651	A2	A5-A7	PC	L2/3-IT	GSM6351610
	3007	B2	MD	BS	ODC	GSM6027707				1535	A4	CBL	cere	CB	GSM6305369			698	A2	A5-A7	PC	L2/3-IT	GSM6351846
	3006	B2	MD	BS	ODC	GSM6027633				1537	A4	CBL	cere	CB	GSM6305373			808	A2	A5-A7	PC	L2/3-IT	GSM6352830
	3386	B3	CBV	cere	CB	GSM7232554				1538	A4	CBL	cere	CB	GSM6305374			970	A3	FI	FC	Vip	GSM6369332
	3367	B3	CBV	cere	CB	GSM7232516				1539	A4	CBL	cere	CB	GSM6305379			1147	A3	FI	FC	Vip	GSM6371516
	3350	B3	CBV	cere	CB	GSM7232472				1540	A4	CBL	cere	CB	GSM6305387			1024	A3	FI	FC	Vip	GSM6370029
	3286	B3	CBV	cere	CB	GSM7232148				1541	A4	CBL	cere	CB	GSM6305396			978	A3	FI	FC	Vip	GSM6369650
	3231	B3	CBV	cere	CB	GSM7231985				1543	A4	CBL	cere	CB	GSM6305403			1032	A3	FI	FC	Vip	GSM6370081
	3080	B3	CBV	cere	CB	GSM7231349				1544	A4	CBL	cere	CB	GSM6305404			992	A3	FI	FC	Vip	GSM6369711
	3319	B3	CBV	cere	CB	GSM7232356				1545	A4	CBL	cere	CB	GSM6305407			968	A3	FI	FC	Vip	GSM6369293
	3317	B3	CBV	cere	CB	GSM7232340				1547	A4	CBL	cere	CB	GSM6305484			1155	A3	FI	FC	Sst	GSM6371849
	3388	B3	CBV	cere	CB	GSM7232559				1550	A4	CBL	cere	CB	GSM6305621			1129	A3	FI	FC	Sst	GSM6370953
	3167	B3	CBV	cere	CB	GSM7231588				1600	A4	CBL	cere	CB	GSM6305876			979	A3	FI	FC	Sst	GSM6369654
	3361	B3	CBV	cere	CB	GSM7232492				1611	A4	CBL	cere	CB	GSM6305946			984	A3	FI	FC	Sst	GSM6369671
	3320	B3	CBV	cere	CB	GSM7232357				1627	A4	CBL	cere	CB	GSM6306010			1022	A3	FI	FC	Sst	GSM6370023
	3334	B3	CBV	cere	CB	GSM7232415				1644	A4	CBL	cere	CB	GSM6306235			1023	A3	FI	FC	Sst	GSM6370027
	3343	B3	CBV	cere	CB	GSM7232448				1650	A4	CBL	cere	CB	GSM6306277			1045	A3	FI	FC	Sst	GSM6370138
	3155	B3	CBV	cere	CB	GSM7231539				1670	A4	CBL	cere	CB	GSM6306550			1097	A3	FI	FC	Sncg	GSM6370498
	3061	B3	CBV	cere	CB	GSM7231256				1672	A4	CBL	cere	CB	GSM6306598			967	A3	FI	FC	Sncg	GSM6369291
	3289	B3	CBV	cere	CB	GSM7232163				1675	A4	CBL	cere	ODC	GSM6305039			973	A3	FI	FC	Sncg	GSM6369627
	3135	B3	CBV	cere	CB	GSM7231498				2356	B2	A19	OC	Sst	GSM7144261			1113	A3	FI	FC	Sncg	GSM6370679
	3137	B3	CBV	cere	CB	GSM7231500				2375	B2	A19	OC	Lamp5	GSM7146138			980	A3	FI	FC	Sncg	GSM6369657
	3290	B3	CBV	cere	CB	GSM7232181				2412	B2	A19	OC	Pvalb	GSM7193295			1014	A3	FI	FC	Pvalb	GSM6369831
	3138	B3	CBV	cere	CB	GSM7231501				2423	B2	A19	OC	Vip	GSM7194109			1142	A3	FI	FC	Pvalb	GSM6371429
	3291	B3	CBV	cere	CB	GSM7232182				2474	B2	A19	OC	Sst	GSM7194501			1017	A3	FI	FC	Pvalb	GSM6369903
	3201	B3	CBV	cere	CB	GSM7231723				2544	B2	A19	OC	L4_6	GSM7144571			974	A3	FI	FC	Pvalb	GSM6369636
	3127	B3	CBV	cere	CB	GSM7231490				2550	B2	A19	OC	L4_6	GSM7194562			975	A3	FI	FC	Pvalb	GSM6369639
	3123	B3	CBV	cere	CB	GSM7231485				2577	B2	A19	OC	L4_6	GSM7194856			1091	A3	FI	FC	Pvalb	GSM6370482
	3438	B3	CBV	cere	OPC	GSM7231335				2583	B2	A19	OC	L2/3-IT	GSM7143288			1031	A3	FI	FC	Pvalb	GSM6370074
	3437	B3	CBV	cere	ODC	GSM7232470				2588	B2	A19	OC	L2/3-IT	GSM7192849			983	A3	FI	FC	Pvalb	GSM6369667
	3435	B3	CBV	cere	ODC	GSM7232288				2589	B2	A19	OC	L2/3-IT	GSM7194385			1018	A3	FI	FC	Pvalb	GSM6369961
	3431	B3	CBV	cere	ODC	GSM7231482				2593	B2	A19	OC	L2/3-IT	GSM7194202			1192	A3	FI	FC	ODC	GSM6370635
	3453	B4	A19	OC	Lamp5	GSM7160524				2594	B2	A19	OC	L4_6	GSM7145011			1164	A3	FI	FC	ASC	GSM6369941
	3459	B4	A19	OC	Lamp5	GSM7162296				2598	B2	A19	OC	L2/3-IT	GSM7143914			1162	A3	FI	FC	ASC	GSM6369764
	3462	B4	A19	OC	Lamp5	GSM7162516				2600	B2	A19	OC	L4_6	GSM7193389			1169	A3	FI	FC	OPC	GSM6370175
	3466	B4	A19	OC	Lamp5	GSM7159786				2601	B2	A19	OC	L2/3-IT	GSM7194563			1170	A3	FI	FC	ODC	GSM6370243
	3465	B4	A19	OC	Lamp5	GSM7159674				2602	B2	A19	OC	L2/3-IT	GSM7143866			1184	A3	FI	FC	OPC	GSM6370547
	3523	B4	A19	OC	Sncg	GSM7162613				2606	B2	A19	OC	L2/3-IT	GSM7144947			1171	A3	FI	FC	ODC	GSM6370259
	3522	B4	A19	OC	Sncg	GSM7162251				2608	B2	A19	OC	L4_6	GSM7167806			1213	A3	FI	FC	ODC	GSM6370781
	3520	B4	A19	OC	Sncg	GSM7161737				2610	B2	A19	OC	L4_6	GSM7143751			1181	A3	FI	FC	ASC	GSM6370401
	3606	B4	A19	OC	Vip	GSM7162484				2616	B2	A19	OC	L2/3-IT	GSM7194177			1179	A3	FI	FC	ODC	GSM6370301
	3595	B4	A19	OC	Vip	GSM7162062				2617	B2	A19	OC	L4_6	GSM7143539			1226	A3	FI	FC	ASC	GSM6371236
	3603	B4	A19	OC	Vip	GSM7162470				2632	B2	A19	OC	L2/3-IT	GSM7194801			1206	A3	FI	FC	OPC	GSM6370666
	3612	B4	A19	OC	Vip	GSM7162550				2644	B2	A19	OC	L2/3-IT	GSM7144380			1036	A3	FI	FC	Lamp5	GSM6370089
	3580	B4	A19	OC	Vip	GSM7159782				2656	B2	A19	OC	L2/3-IT	GSM7193288			1145	A3	FI	FC	Lamp5	GSM6371486
	3534	B4	A19	OC	Sst	GSM7159797				2659	B2	A19	OC	L4_6	GSM7193132			1136	A3	FI	FC	Lamp5	GSM6371183
	3552	B4	A19	OC	Sst	GSM7161833				2660	B2	A19	OC	L2/3-IT	GSM7144384			976	A3	FI	FC	Lamp5	GSM6369646
	3562	B4	A19	OC	Sst	GSM7162460				2663	B2	A19	OC	L4_6	GSM7193751			991	A3	FI	FC	Lamp5	GSM6369710
	3532	B4	A19	OC	Sst	GSM7159783				2677	B2	A19	OC	L2/3-IT	GSM7194695			982	A3	FI	FC	Lamp5	GSM6369664
	3529	B4	A19	OC	Sst	GSM7159755				2683	B2	A19	OC	L2/3-IT	GSM7192525			1124	A3	FI	FC	Lamp5	GSM6370842
	3498	B4	A19	OC	Pvalb	GSM7162412				2685	B2	A19	OC	L4_6	GSM7194502			1456	A3	FI	FC	L4_6	GSM6370832
	3485	B4	A19	OC	Pvalb	GSM7161849				2692	B2	A19	OC	L4_6	GSM7166355			1490	A3	FI	FC	L4_6	GSM6371752
	3505	B4	A19	OC	Pvalb	GSM7162598				2718	B2	A19	OC	L4_6	GSM7194316			1403	A3	FI	FC	L4_6	GSM6370470
	3506	B4	A19	OC	Pvalb	GSM7162611				2739	B2	A19	OC	L2/3-IT	GSM7146031			1440	A3	FI	FC	L4_6	GSM6370721
	3479	B4	A19	OC	Pvalb	GSM7160263				2747	B2	A19	OC	L4_6	GSM7143314			1331	A3	FI	FC	L4_6	GSM6369966
	3883	B4	A19	OC	L4_6	GSM7162580				2753	B2	A19	OC	L4_6	GSM7194238			1392	A3	FI	FC	L4_6	GSM6370368
	3925	B4	A19	OC	L4_6	GSM7161792				2754	B2	A19	OC	L4_6	GSM7145430			1330	A3	FI	FC	L4_6	GSM6369963
	3876	B4	A19	OC	L4_6	GSM7162514				2757	B2	A19	OC	L2/3-IT	GSM7194208			1495	A3	FI	FC	L4_6	GSM6371835
	3964	B4	A19	OC	L4_6	GSM7159804				2900	B4	V1C	OC	Sst	GSM7143442			1480	A3	FI	FC	L4_6	GSM6371452
	3873	B4	A19	OC	L4_6	GSM7162500				2907	B4	V1C	OC	Sst	GSM7144308			1469	A3	FI	FC	L4_6	GSM6370969
	3907	B4	A19	OC	L4_6	GSM7159800				2919	B4	V1C	OC	Vip	GSM7146072			1422	A3	FI	FC	L4_6	GSM6370603
	3877	B4	A19	OC	L4_6	GSM7162541				2937	B4	V1C	OC	Sst	GSM7143372			1488	A3	FI	FC	L4_6	GSM6371711
	3903	B4	A19	OC	L4_6	GSM7159769				2941	B4	V1C	OC	Sst	GSM7167539			1472	A3	FI	FC	L4_6	GSM6371106
	3961	B4	A19	OC	L4_6	GSM7162605				2946	B4	V1C	OC	Sst	GSM7166484			1256	A3	FI	FC	L4_6	GSM6369615
	3902	B4	A19	OC	L4_6	GSM7159765				2947	B4	V1C	OC	Pvalb	GSM7166497			1291	A3	FI	FC	L4_6	GSM6369680
	3850	B4	A19	OC	L4_6	GSM7162258				2948	B4	V1C	OC	Pvalb	GSM7194255			1273	A3	FI	FC	L4_6	GSM6369643
	3796	B4	A19	OC	L4_6	GSM7159938				2954	B4	V1C	OC	Vip	GSM7167722			1263	A3	FI	FC	L4_6	GSM6369626
	3868	B4	A19	OC	L4_6	GSM7162469				2958	B4	V1C	OC	Sst	GSM7168747			1272	A3	FI	FC	L4_6	GSM6369641
	3879	B4	A19	OC	L4_6	GSM7162561				2959	B4	V1C	OC	Vip	GSM7193254			1252	A3	FI	FC	L4_6	GSM6369375
	3860	B4	A19	OC	L4_6	GSM7162321				2969	B4	V1C	OC	Sst	GSM7144805			1434	A3	FI	FC	L4_6	GSM6370668
	3843	B4	A19	OC	L4_6	GSM7162158				2983	B4	V1C	OC	Vip	GSM7194216			1276	A3	FI	FC	L4_6	GSM6369649
	3896	B4	A19	OC	L4_6	GSM7162482				2987	B4	V1C	OC	Sst	GSM7145035			1279	A3	FI	FC	L4_6	GSM6369655
	3983	B4	A19	OC	L4_6	GSM7159789				2992	B4	V1C	OC	Vip	GSM7193311			1261	A3	FI	FC	L4_6	GSM6369621
	3960	B4	A19	OC	L4_6	GSM7162575				2993	B4	V1C	OC	Pvalb	GSM7144345			1259	A3	FI	FC	L4_6	GSM6369618
	3969	B4	A19	OC	L4_6	GSM7162170				2995	B4	V1C	OC	Sst	GSM7145304			1289	A3	FI	FC	L4_6	GSM6369676
	3864	B4	A19	OC	L4_6	GSM7162360				2998	B4	V1C	OC	Sst	GSM7145811			1269	A3	FI	FC	L4_6	GSM6369635
	3791	B4	A19	OC	L4_6	GSM7159744				3001	B4	V1C	OC	Sst	GSM7193139			1477	A3	FI	FC	L4_6	GSM6371391
	3862	B4	A19	OC	L4_6	GSM7162331				3002	B4	V1C	OC	Pvalb	GSM7194506			1373	A3	FI	FC	L4_6	GSM6370197
	3927	B4	A19	OC	L4_6	GSM7161853				3007	B4	V1C	OC	Vip	GSM7194816			1268	A3	FI	FC	L4_6	GSM6369634
	3696	B4	A19	OC	L2/3-IT	GSM7161730				3009	B4	V1C	OC	Sst	GSM7143150			1274	A3	FI	FC	L4_6	GSM6369645
	3766	B4	A19	OC	L2/3-IT	GSM7162488				3011	B4	V1C	OC	Lamp5	GSM7168913			1288	A3	FI	FC	L2/3-IT	GSM6369672
	3699	B4	A19	OC	L2/3-IT	GSM7161788				3023	B4	V1C	OC	Vip	GSM7193468			1275	A3	FI	FC	L2/3-IT	GSM6369647
	3772	B4	A19	OC	L2/3-IT	GSM7162513				3024	B4	V1C	OC	Vip	GSM7194812			1446	A3	FI	FC	L2/3-IT	GSM6370805
	3710	B4	A19	OC	L2/3-IT	GSM7161935				3027	B4	V1C	OC	Sst	GSM7194740			1344	A3	FI	FC	L2/3-IT	GSM6370026
	3760	B4	A19	OC	L2/3-IT	GSM7162452				3029	B4	V1C	OC	Sst	GSM7193169			1287	A3	FI	FC	L2/3-IT	GSM6369670
	3771	B4	A19	OC	L2/3-IT	GSM7162511				3037	B4	V1C	OC	ASC	GSM7167014			1264	A3	FI	FC	L2/3-IT	GSM6369628
	3644	B4	A19	OC	L2/3-IT	GSM7159730				3040	B4	V1C	OC	ODC	GSM7185684			1424	A3	FI	FC	L2/3-IT	GSM6370622
	3774	B4	A19	OC	L2/3-IT	GSM7162529				3059	B4	V1C	OC	ODC	GSM7144838			1258	A3	FI	FC	L2/3-IT	GSM6369617
	3776	B4	A19	OC	L2/3-IT	GSM7162537				3063	B4	V1C	OC	ODC	GSM7143807			1257	A3	FI	FC	L2/3-IT	GSM6369616
	3768	B4	A19	OC	L2/3-IT	GSM7162492				3066	B4	V1C	OC	OPC	GSM7194290			1355	A3	FI	FC	L2/3-IT	GSM6370083
	3758	B4	A19	OC	L2/3-IT	GSM7162448				3067	B4	V1C	OC	ASC	GSM7167786			1348	A3	FI	FC	L2/3-IT	GSM6370053
	3715	B4	A19	OC	L2/3-IT	GSM7161954				3103	B4	V1C	OC	L4_6	GSM7192629			1286	A3	FI	FC	L2/3-IT	GSM6369668
	3651	B4	A19	OC	L2/3-IT	GSM7159781				3108	B4	V1C	OC	L4_6	GSM7144866			1345	A3	FI	FC	L2/3-IT	GSM6370049
	3784	B4	A19	OC	L2/3-IT	GSM7162606				3119	B4	V1C	OC	L4_6	GSM7193123			1265	A3	FI	FC	L2/3-IT	GSM6369630
	3652	B4	A19	OC	L2/3-IT	GSM7159787				3125	B4	V1C	OC	L4_6	GSM7167882			1332	A3	FI	FC	L2/3-IT	GSM6369972
	3765	B4	A19	OC	L2/3-IT	GSM7162486				3130	B4	V1C	OC	L2/3-IT	GSM7194195			1493	A3	FI	FC	L2/3-IT	GSM6371780
	3785	B4	A19	OC	L2/3-IT	GSM7162624				3142	B4	V1C	OC	L2/3-IT	GSM7145699			1351	A3	FI	FC	L2/3-IT	GSM6370072
	3746	B4	A19	OC	L2/3-IT	GSM7162324				3148	B4	V1C	OC	L2/3-IT	GSM7144578			1369	A3	FI	FC	L2/3-IT	GSM6370173
	3761	B4	A19	OC	L2/3-IT	GSM7162463				3159	B4	V1C	OC	L4_6	GSM7145539			1271	A3	FI	FC	L2/3-IT	GSM6369640
	3655	B4	A19	OC	L2/3-IT	GSM7159799				3179	B4	V1C	OC	L4_6	GSM7145801			1362	A3	FI	FC	L2/3-IT	GSM6370129
	3747	B4	A19	OC	L2/3-IT	GSM7162329				3180	B4	V1C	OC	L2/3-IT	GSM7166482			1290	A3	FI	FC	L2/3-IT	GSM6369679
	3780	B4	A19	OC	L2/3-IT	GSM7162559				3230	B4	V1C	OC	L4_6	GSM7169073			1455	A3	FI	FC	L2/3-IT	GSM6370823
	3740	B4	A19	OC	L2/3-IT	GSM7162255				3236	B4	V1C	OC	L2/3-IT	GSM7143154			1295	A3	FI	FC	L2/3-IT	GSM6369691
	3722	B4	A19	OC	L2/3-IT	GSM7162066				3237	B4	V1C	OC	L2/3-IT	GSM7143722			1390	A3	FI	FC	L2/3-IT	GSM6370366
	3617	B4	A19	OC	ASC	GSM7160021				3257	B4	V1C	OC	L4_6	GSM7144336			1453	A3	FI	FC	L2/3-IT	GSM6370817
	3631	B4	A19	OC	OPC	GSM7159792				3261	B4	V1C	OC	L2/3-IT	GSM7193400			1292	A3	FI	FC	L2/3-IT	GSM6369683
	3621	B4	A19	OC	ODC	GSM7159736				3269	B4	V1C	OC	L2/3-IT	GSM7194117			1266	A3	FI	FC	L2/3-IT	GSM6369631
	3622	B4	A19	OC	ODC	GSM7159737				3270	B4	V1C	OC	L2/3-IT	GSM7193262			1443	A3	FI	FC	L2/3-IT	GSM6370799
	3624	B4	A19	OC	ODC	GSM7159883				3275	B4	V1C	OC	L4_6	GSM7144937			1297	A3	FI	FC	L2/3-IT	GSM6369707
	3629	B4	A19	OC	ODC	GSM7161840				3281	B4	V1C	OC	L4_6	GSM7167096			1459	A3	FI	FC	L2/3-IT	GSM6370840
	3630	B4	A19	OC	ODC	GSM7161875				3284	B4	V1C	OC	L4_6	GSM7193275			1597	A4	A46	FC	Vip	GSM6374681
	3626	B4	A19	OC	ODC	GSM7160270				3290	B4	V1C	OC	L2/3-IT	GSM7194210			1580	A4	A46	FC	Vip	GSM6374632
	3628	B4	A19	OC	ODC	GSM7161376				3291	B4	V1C	OC	L2/3-IT	GSM7143357			1558	A4	A46	FC	Vip	GSM6374564
	3623	B4	A19	OC	ODC	GSM7159757				3353	B4	V1C	OC	L2/3-IT	GSM7194819			1578	A4	A46	FC	Vip	GSM6374628
	4005	C1	A5-A7	PC	Lamp5	GSM5408237				3369	B4	V1C	OC	L4_6	GSM7144230			1577	A4	A46	FC	Vip	GSM6374627
	4021	C1	A5-A7	PC	Lamp5	GSM5409895				3374	B4	V1C	OC	L4_6	GSM7144487			1678	A4	A46	FC	Sst	GSM6375862
	4000	C1	A5-A7	PC	Lamp5	GSM5407592				3376	B4	V1C	OC	L2/3-IT	GSM7185492			1611	A4	A46	FC	Sst	GSM6374721
	4025	C1	A5-A7	PC	Lamp5	GSM5410157				3390	B4	V1C	OC	L4_6	GSM7169446			1648	A4	A46	FC	Sst	GSM6375254
	4003	C1	A5-A7	PC	Lamp5	GSM5408214				3425	B4	V1C	OC	L2/3-IT	GSM7167720			1649	A4	A46	FC	Sst	GSM6375260
	4040	C1	A5-A7	PC	Lamp5	GSM5410164				3429	B4	V1C	OC	L4_6	GSM7143412			1684	A4	A46	FC	Sst	GSM6375902
	4026	C1	A5-A7	PC	Lamp5	GSM5410179				3437	B4	V1C	OC	L2/3-IT	GSM7194547			1700	A4	A46	FC	Pvalb	GSM6376255
	4133	C1	A5-A7	PC	Sncg	GSM5408238				3447	B4	V1C	OC	L4_6	GSM7193744			1520	A4	A46	FC	Pvalb	GSM6374335
	4134	C1	A5-A7	PC	Sncg	GSM5408255				3451	B4	V1C	OC	L2/3-IT	GSM7167742			1671	A4	A46	FC	Pvalb	GSM6375502
	4143	C1	A5-A7	PC	Sncg	GSM5409027				3452	B4	V1C	OC	L2/3-IT	GSM7168580			1539	A4	A46	FC	Pvalb	GSM6374440
	4148	C1	A5-A7	PC	Sncg	GSM5410177				3474	B4	V1C	OC	L2/3-IT	GSM7193183			1547	A4	A46	FC	Pvalb	GSM6374519
	4131	C1	A5-A7	PC	Sncg	GSM5408102				3479	B4	V1C	OC	L4_6	GSM7167727			1716	A4	A46	FC	ODC	GSM6374466
	4144	C1	A5-A7	PC	Sncg	GSM5409126				3480	B4	V1C	OC	L4_6	GSM7167715			1715	A4	A46	FC	ODC	GSM6374465
	4146	C1	A5-A7	PC	Sncg	GSM5409719				3483	B4	V1C	OC	L4_6	GSM7193738			1722	A4	A46	FC	ODC	GSM6374489
	4334	C1	A5-A7	PC	Vip	GSM5409770				3488	B4	V1C	OC	L2/3-IT	GSM7169048			1744	A4	A46	FC	ODC	GSM6376300
	4292	C1	A5-A7	PC	Vip	GSM5408298				3490	B4	V1C	OC	L2/3-IT	GSM7193653			1697	A4	A46	FC	Lamp5	GSM6376213
	4356	C1	A5-A7	PC	Vip	GSM5410311				3504	B4	V1C	OC	L2/3-IT	GSM7166814			1704	A4	A46	FC	Lamp5	GSM6376443
	4355	C1	A5-A7	PC	Vip	GSM5410307				3505	B4	V1C	OC	L4_6	GSM7169033			1555	A4	A46	FC	Lamp5	GSM6374552
	4352	C1	A5-A7	PC	Vip	GSM5410279				3520	B4	V1C	OC	L2/3-IT	GSM7143657			1542	A4	A46	FC	Lamp5	GSM6374504
	4354	C1	A5-A7	PC	Vip	GSM5410299				3526	B4	V1C	OC	L2/3-IT	GSM7194848			1575	A4	A46	FC	Lamp5	GSM6374624
	4293	C1	A5-A7	PC	Vip	GSM5408312				3527	B4	V1C	OC	L2/3-IT	GSM7144711			1972	A4	A46	FC	L4_6	GSM6375839
	4187	C1	A5-A7	PC	Sst	GSM5408334				3531	B4	V1C	OC	L4_6	GSM7144291			1989	A4	A46	FC	L4_6	GSM6376025
	4183	C1	A5-A7	PC	Sst	GSM5408294				3532	B4	V1C	OC	L2/3-IT	GSM7145807			1862	A4	A46	FC	L4_6	GSM6374650
	4179	C1	A5-A7	PC	Sst	GSM5408253				3533	B4	V1C	OC	L2/3-IT	GSM7167760			1794	A4	A46	FC	L4_6	GSM6374399
	4184	C1	A5-A7	PC	Sst	GSM5408295				3537	B4	V1C	OC	L2/3-IT	GSM7143719			1867	A4	A46	FC	L4_6	GSM6374664
	4227	C1	A5-A7	PC	Sst	GSM5409587				3551	B4	V1C	OC	L2/3-IT	GSM7168548			1916	A4	A46	FC	L4_6	GSM6375065
	4256	C1	A5-A7	PC	Sst	GSM5410187				3562	B4	V1C	OC	L4_6	GSM7169386			1939	A4	A46	FC	L4_6	GSM6375346
	4253	C1	A5-A7	PC	Sst	GSM5410156				3563	B4	V1C	OC	L2/3-IT	GSM7193188			1937	A4	A46	FC	L4_6	GSM6375304
	4113	C1	A5-A7	PC	Pvalb	GSM5410282				3564	B4	V1C	OC	L2/3-IT	GSM7194700			1970	A4	A46	FC	L4_6	GSM6375746
	4069	C1	A5-A7	PC	Pvalb	GSM5408303				3566	B4	V1C	OC	L4_6	GSM7143149			1932	A4	A46	FC	L4_6	GSM6375206
	4045	C1	A5-A7	PC	Pvalb	GSM5407286				3568	B4	V1C	OC	L2/3-IT	GSM7167868			1998	A4	A46	FC	L4_6	GSM6376413
	4116	C1	A5-A7	PC	Pvalb	GSM5408254				3590	B4	V1C	OC	L2/3-IT	GSM7168586			1863	A4	A46	FC	L4_6	GSM6374656
	4065	C1	A5-A7	PC	Pvalb	GSM5408230				3591	B4	V1C	OC	L2/3-IT	GSM7193599			1795	A4	A46	FC	L4_6	GSM6374403
	4115	C1	A5-A7	PC	Pvalb	GSM5407387				3596	B4	V1C	OC	L2/3-IT	GSM7144509			1933	A4	A46	FC	L4_6	GSM6375242
	4059	C1	A5-A7	PC	Pvalb	GSM5408142				3597	B4	V1C	OC	L2/3-IT	GSM7192545			1960	A4	A46	FC	L4_6	GSM6375517
	4748	C1	A5-A7	PC	L4_6	GSM5408375				3598	B4	V1C	OC	L2/3-IT	GSM7194209			1842	A4	A46	FC	L4_6	GSM6374598
	4881	C1	A5-A7	PC	L4_6	GSM5408299				3606	B4	V1C	OC	L2/3-IT	GSM7144080			1873	A4	A46	FC	L4_6	GSM6374692
	4879	C1	A5-A7	PC	L4_6	GSM5408221				3608	B4	V1C	OC	L2/3-IT	GSM7143455			1967	A4	A46	FC	L4_6	GSM6375563
	5025	C1	A5-A7	PC	L4_6	GSM5408265				3611	B4	V1C	OC	L2/3-IT	GSM7168663			1832	A4	A46	FC	L4_6	GSM6374577
	4871	C1	A5-A7	PC	L4_6	GSM5408161				3615	B4	V1C	OC	L2/3-IT	GSM7192865			1834	A4	A46	FC	L4_6	GSM6374579
	4794	C1	A5-A7	PC	L4_6	GSM5409579				3629	C1	FI	FC	Sst	GSM7227187			1815	A4	A46	FC	L4_6	GSM6374528
	4884	C1	A5-A7	PC	L4_6	GSM5408331				3635	C1	FI	FC	Lamp5	GSM7227517			1811	A4	A46	FC	L4_6	GSM6374515
	5055	C1	A5-A7	PC	L4_6	GSM5408246				3644	C1	FI	FC	Sncg	GSM7227751			1789	A4	A46	FC	L4_6	GSM6374377
	4880	C1	A5-A7	PC	L4_6	GSM5408226				3666	C1	FI	FC	Vip	GSM7228155			1852	A4	A46	FC	L4_6	GSM6374630
	4735	C1	A5-A7	PC	L4_6	GSM5408190				3674	C1	FI	FC	Lamp5	GSM7228188			1982	A4	A46	FC	L4_6	GSM6375886
	4795	C1	A5-A7	PC	L4_6	GSM5409584				3677	C1	FI	FC	Lamp5	GSM7228198			1786	A4	A46	FC	L2/3-IT	GSM6374330
	4883	C1	A5-A7	PC	L4_6	GSM5408330				3678	C1	FI	FC	Sst	GSM7228200			1787	A4	A46	FC	L2/3-IT	GSM6374349
	4738	C1	A5-A7	PC	L4_6	GSM5408239				3683	C1	FI	FC	Lamp5	GSM7228209			1861	A4	A46	FC	L2/3-IT	GSM6374648
	4743	C1	A5-A7	PC	L4_6	GSM5408297				3685	C1	FI	FC	Vip	GSM7228214			1855	A4	A46	FC	L2/3-IT	GSM6374638
	4823	C1	A5-A7	PC	L4_6	GSM5410165				3686	C1	FI	FC	Sncg	GSM7228216			1835	A4	A46	FC	L2/3-IT	GSM6374580
	4736	C1	A5-A7	PC	L4_6	GSM5408219				3688	C1	FI	FC	Lamp5	GSM7228219			1908	A4	A46	FC	L2/3-IT	GSM6374930
	5047	C1	A5-A7	PC	L4_6	GSM5410176				3689	C1	FI	FC	Vip	GSM7228220			1922	A4	A46	FC	L2/3-IT	GSM6375143
	4953	C1	A5-A7	PC	L4_6	GSM5410129				3694	C1	FI	FC	Pvalb	GSM7228238			1836	A4	A46	FC	L2/3-IT	GSM6374582
	4876	C1	A5-A7	PC	L4_6	GSM5408203				3699	C1	FI	FC	Sst	GSM7228272			1866	A4	A46	FC	L2/3-IT	GSM6374662
	4820	C1	A5-A7	PC	L4_6	GSM5410128				3718	C1	FI	FC	Vip	GSM7228416			1830	A4	A46	FC	L2/3-IT	GSM6374568
	5026	C1	A5-A7	PC	L4_6	GSM5408306				3733	C1	FI	FC	Sst	GSM7228492			1812	A4	A46	FC	L2/3-IT	GSM6374517
	4826	C1	A5-A7	PC	L4_6	GSM5410218				3734	C1	FI	FC	Sncg	GSM7228495			1868	A4	A46	FC	L2/3-IT	GSM6374669
	4732	C1	A5-A7	PC	L4_6	GSM5408168				3736	C1	FI	FC	Pvalb	GSM7228501			1964	A4	A46	FC	L2/3-IT	GSM6375532
	4996	C1	A5-A7	PC	L4_6	GSM5408264				3739	C1	FI	FC	Sst	GSM7228523			1909	A4	A46	FC	L2/3-IT	GSM6374933
	4508	C1	A5-A7	PC	L2/3-IT	GSM5408262				3774	C1	FI	FC	Pvalb	GSM7229043			1773	A4	A46	FC	L2/3-IT	GSM6374205
	4507	C1	A5-A7	PC	L2/3-IT	GSM5408261				3793	C1	FI	FC	Vip	GSM7229173			1825	A4	A46	FC	L2/3-IT	GSM6374558
	4517	C1	A5-A7	PC	L2/3-IT	GSM5408302				3795	C1	FI	FC	Pvalb	GSM7229175			1895	A4	A46	FC	L2/3-IT	GSM6374876
	4482	C1	A5-A7	PC	L2/3-IT	GSM5408176				3797	C1	FI	FC	Sncg	GSM7229188			1877	A4	A46	FC	L2/3-IT	GSM6374708
	4469	C1	A5-A7	PC	L2/3-IT	GSM5408150				3827	C1	FI	FC	Sncg	GSM7229414			2449	B2	A44-A45	FC	Vip	GSM6404646
	4484	C1	A5-A7	PC	L2/3-IT	GSM5408181				3836	C1	FI	FC	Pvalb	GSM7229526			2503	B2	A44-A45	FC	Vip	GSM6405224
	4473	C1	A5-A7	PC	L2/3-IT	GSM5408165				3852	C1	FI	FC	ODC	GSM7227152			2518	B2	A44-A45	FC	Vip	GSM6406037
	4519	C1	A5-A7	PC	L2/3-IT	GSM5408318				3853	C1	FI	FC	ODC	GSM7227177			2520	B2	A44-A45	FC	Vip	GSM6406046
	4522	C1	A5-A7	PC	L2/3-IT	GSM5408336				3854	C1	FI	FC	ASC	GSM7227194			2540	B2	A44-A45	FC	Vip	GSM6406130
	4503	C1	A5-A7	PC	L2/3-IT	GSM5408240				3855	C1	FI	FC	OPC	GSM7227649			2524	B2	A44-A45	FC	Vip	GSM6406056
	4512	C1	A5-A7	PC	L2/3-IT	GSM5408286				3857	C1	FI	FC	ODC	GSM7227932			2531	B2	A44-A45	FC	Vip	GSM6406077
	4498	C1	A5-A7	PC	L2/3-IT	GSM5408224				3859	C1	FI	FC	OPC	GSM7227991			2517	B2	A44-A45	FC	Sst	GSM6406036
	4474	C1	A5-A7	PC	L2/3-IT	GSM5408166				3860	C1	FI	FC	ODC	GSM7228140			2526	B2	A44-A45	FC	Sst	GSM6406061
	4521	C1	A5-A7	PC	L2/3-IT	GSM5408327				3861	C1	FI	FC	OPC	GSM7228223			2521	B2	A44-A45	FC	Sst	GSM6406049
	4511	C1	A5-A7	PC	L2/3-IT	GSM5408283				3862	C1	FI	FC	ODC	GSM7228277			2515	B2	A44-A45	FC	Sst	GSM6406027
	4501	C1	A5-A7	PC	L2/3-IT	GSM5408233				3866	C1	FI	FC	ODC	GSM7228425			2532	B2	A44-A45	FC	Sst	GSM6406078
	4471	C1	A5-A7	PC	L2/3-IT	GSM5408162				3868	C1	FI	FC	ASC	GSM7228435			2539	B2	A44-A45	FC	Sst	GSM6406127
	4513	C1	A5-A7	PC	L2/3-IT	GSM5408287				3869	C1	FI	FC	ASC	GSM7228480			2541	B2	A44-A45	FC	Sst	GSM6406135
	4701	C1	A5-A7	PC	L2/3-IT	GSM5410306				3870	C1	FI	FC	OPC	GSM7228517			2505	B2	A44-A45	FC	Sncg	GSM6405644
	4496	C1	A5-A7	PC	L2/3-IT	GSM5408213				3871	C1	FI	FC	ASC	GSM7228532			2538	B2	A44-A45	FC	Sncg	GSM6406111
	4502	C1	A5-A7	PC	L2/3-IT	GSM5408234				3872	C1	FI	FC	ASC	GSM7228756			2527	B2	A44-A45	FC	Sncg	GSM6406065
	4623	C1	A5-A7	PC	L2/3-IT	GSM5409561				3885	C1	FI	FC	ODC	GSM7229308			2447	B2	A44-A45	FC	Sncg	GSM6404565
	4406	C1	A5-A7	PC	L2/3-IT	GSM5407386				3889	C1	FI	FC	ODC	GSM7229543			2528	B2	A44-A45	FC	Pvalb	GSM6406069
	4467	C1	A5-A7	PC	L2/3-IT	GSM5408147				3897	C1	FI	FC	L2/3-IT	GSM7227156			2519	B2	A44-A45	FC	Pvalb	GSM6406045
	4363	C1	A5-A7	PC	ASC	GSM5410123				3901	C1	FI	FC	L2/3-IT	GSM7227171			2530	B2	A44-A45	FC	Pvalb	GSM6406072
	4361	C1	A5-A7	PC	ASC	GSM5408818				3905	C1	FI	FC	L4_6	GSM7227191			2568	B2	A44-A45	FC	Pvalb	GSM6406490
	4360	C1	A5-A7	PC	ASC	GSM5408242				3906	C1	FI	FC	L2/3-IT	GSM7227198			2614	B2	A44-A45	FC	ODC	GSM6406113
	4364	C1	A5-A7	PC	ASC	GSM5410173				3907	C1	FI	FC	L4_6	GSM7227199			2612	B2	A44-A45	FC	OPC	GSM6406109
	4358	C1	A5-A7	PC	ASC	GSM5407399				3927	C1	FI	FC	L2/3-IT	GSM7227594			2626	B2	A44-A45	FC	ODC	GSM6406140
	4359	C1	A5-A7	PC	ASC	GSM5407622				3972	C1	FI	FC	L4_6	GSM7228097			2617	B2	A44-A45	FC	ODC	GSM6406120
	4362	C1	A5-A7	PC	ASC	GSM5408833				3976	C1	FI	FC	L4_6	GSM7228112			2596	B2	A44-A45	FC	ASC	GSM6404734
	4367	C1	A5-A7	PC	ODC	GSM5407279				3977	C1	FI	FC	L2/3-IT	GSM7228113			2599	B2	A44-A45	FC	ODC	GSM6405476
	4371	C1	A5-A7	PC	ODC	GSM5408197				3978	C1	FI	FC	L2/3-IT	GSM7228115			2628	B2	A44-A45	FC	ODC	GSM6406144
	4382	C1	A5-A7	PC	ODC	GSM5409736				3982	C1	FI	FC	L4_6	GSM7228128			2613	B2	A44-A45	FC	ASC	GSM6406112
	4379	C1	A5-A7	PC	ODC	GSM5409020				4000	C1	FI	FC	L2/3-IT	GSM7228173			2607	B2	A44-A45	FC	ODC	GSM6406096
	4374	C1	A5-A7	PC	ODC	GSM5408678				4001	C1	FI	FC	L2/3-IT	GSM7228174			2621	B2	A44-A45	FC	ASC	GSM6406128
	4377	C1	A5-A7	PC	ODC	GSM5408930				4003	C1	FI	FC	L2/3-IT	GSM7228181			2622	B2	A44-A45	FC	ASC	GSM6406129
	5067	C2	ITG	TC	Lamp5	GSM6146326				4004	C1	FI	FC	L4_6	GSM7228183			2624	B2	A44-A45	FC	ODC	GSM6406136
	5069	C2	ITG	TC	Lamp5	GSM6146492				4005	C1	FI	FC	L2/3-IT	GSM7228184			2600	B2	A44-A45	FC	OPC	GSM6406023
	5077	C2	ITG	TC	Lamp5	GSM6146838				4006	C1	FI	FC	L4_6	GSM7228185			2586	B2	A44-A45	FC	Lamp5	GSM6407155
	5070	C2	ITG	TC	Lamp5	GSM6146501				4008	C1	FI	FC	L2/3-IT	GSM7228189			2542	B2	A44-A45	FC	Lamp5	GSM6406138
	5084	C2	ITG	TC	Lamp5	GSM6148569				4009	C1	FI	FC	L4_6	GSM7228191			2564	B2	A44-A45	FC	Lamp5	GSM6406476
	5113	C2	ITG	TC	Sncg	GSM6146303				4010	C1	FI	FC	L4_6	GSM7228193			2529	B2	A44-A45	FC	Lamp5	GSM6406071
	5115	C2	ITG	TC	Sncg	GSM6146443				4012	C1	FI	FC	L4_6	GSM7228195			2761	B2	A44-A45	FC	L4_6	GSM6405125
	5116	C2	ITG	TC	Sncg	GSM6146480				4016	C1	FI	FC	L4_6	GSM7228201			2780	B2	A44-A45	FC	L4_6	GSM6406041
	5114	C2	ITG	TC	Sncg	GSM6146420				4017	C1	FI	FC	L4_6	GSM7228204			2783	B2	A44-A45	FC	L4_6	GSM6406048
	5177	C2	ITG	TC	Vip	GSM6146392				4018	C1	FI	FC	L4_6	GSM7228206			2795	B2	A44-A45	FC	L4_6	GSM6406067
	5180	C2	ITG	TC	Vip	GSM6146504				4021	C1	FI	FC	L4_6	GSM7228215			2796	B2	A44-A45	FC	L4_6	GSM6406068
	5171	C2	ITG	TC	Vip	GSM6146333				4022	C1	FI	FC	L4_6	GSM7228221			2774	B2	A44-A45	FC	L4_6	GSM6406031
	5178	C2	ITG	TC	Vip	GSM6146494				4023	C1	FI	FC	L4_6	GSM7228224			2784	B2	A44-A45	FC	L4_6	GSM6406050
	5144	C2	ITG	TC	Sst	GSM6146733				4032	C1	FI	FC	L2/3-IT	GSM7228248			2779	B2	A44-A45	FC	L4_6	GSM6406039
	5130	C2	ITG	TC	Sst	GSM6146315				4036	C1	FI	FC	L4_6	GSM7228254			2819	B2	A44-A45	FC	L4_6	GSM6406134
	5139	C2	ITG	TC	Sst	GSM6146665				4062	C1	FI	FC	L2/3-IT	GSM7228385			2777	B2	A44-A45	FC	L4_6	GSM6406035
	5150	C2	ITG	TC	Sst	GSM6146851				4064	C1	FI	FC	L2/3-IT	GSM7228388			2807	B2	A44-A45	FC	L4_6	GSM6406098
	5137	C2	ITG	TC	Sst	GSM6146481				4067	C1	FI	FC	L2/3-IT	GSM7228407			2799	B2	A44-A45	FC	L4_6	GSM6406074
	5086	C2	ITG	TC	Pvalb	GSM6146306				4070	C1	FI	FC	L2/3-IT	GSM7228422			2794	B2	A44-A45	FC	L4_6	GSM6406066
	5111	C2	ITG	TC	Pvalb	GSM6146546				4071	C1	FI	FC	L2/3-IT	GSM7228429			2791	B2	A44-A45	FC	L4_6	GSM6406062
	5090	C2	ITG	TC	Pvalb	GSM6146603				4088	C1	FI	FC	L2/3-IT	GSM7228504			2817	B2	A44-A45	FC	L4_6	GSM6406123
	5107	C2	ITG	TC	Pvalb	GSM6148794				4094	C1	FI	FC	L4_6	GSM7228524			2821	B2	A44-A45	FC	L4_6	GSM6406142
	5103	C2	ITG	TC	Pvalb	GSM6148041				4127	C1	FI	FC	L2/3-IT	GSM7228875			2800	B2	A44-A45	FC	L4_6	GSM6406075
	5449	C2	ITG	TC	L4_6	GSM6146307				4138	C1	FI	FC	L2/3-IT	GSM7229021			2804	B2	A44-A45	FC	L4_6	GSM6406081
	5438	C2	ITG	TC	L4_6	GSM6149022				4147	C1	FI	FC	L4_6	GSM7229056			2818	B2	A44-A45	FC	L4_6	GSM6406126
	5441	C2	ITG	TC	L4_6	GSM6146544				4148	C1	FI	FC	L4_6	GSM7229061			2765	B2	A44-A45	FC	L4_6	GSM6405987
	5401	C2	ITG	TC	L4_6	GSM6146323				4155	C1	FI	FC	L4_6	GSM7229092			2808	B2	A44-A45	FC	L4_6	GSM6406102
	5400	C2	ITG	TC	L4_6	GSM6146318				4156	C1	FI	FC	L4_6	GSM7229099			2811	B2	A44-A45	FC	L2/3-IT	GSM6406107
	5399	C2	ITG	TC	L4_6	GSM6146311				4170	C1	FI	FC	L4_6	GSM7229148			2815	B2	A44-A45	FC	L2/3-IT	GSM6406119
	5360	C2	ITG	TC	L4_6	GSM6146499				4176	C1	FI	FC	L4_6	GSM7229179			2776	B2	A44-A45	FC	L2/3-IT	GSM6406033
	5390	C2	ITG	TC	L4_6	GSM6148749				4185	C1	FI	FC	L4_6	GSM7229203			2810	B2	A44-A45	FC	L2/3-IT	GSM6406106
	5411	C2	ITG	TC	L4_6	GSM6146558				4186	C1	FI	FC	L2/3-IT	GSM7229205			2788	B2	A44-A45	FC	L2/3-IT	GSM6406057
	5383	C2	ITG	TC	L4_6	GSM6148033				4212	C1	FI	FC	L2/3-IT	GSM7229381			2798	B2	A44-A45	FC	L2/3-IT	GSM6406073
	5451	C2	ITG	TC	L4_6	GSM6146483				4217	C1	FI	FC	L2/3-IT	GSM7229400			2782	B2	A44-A45	FC	L2/3-IT	GSM6406044
	5481	C2	ITG	TC	L4_6	GSM6146322				4218	C1	FI	FC	L2/3-IT	GSM7229402			2781	B2	A44-A45	FC	L2/3-IT	GSM6406042
	5467	C2	ITG	TC	L4_6	GSM6146541				4230	C1	FI	FC	L2/3-IT	GSM7229461			2785	B2	A44-A45	FC	L2/3-IT	GSM6406051
	5420	C2	ITG	TC	L4_6	GSM6146852				4245	C2	A44-A45	FC	Sst	GSM7300898			2790	B2	A44-A45	FC	L2/3-IT	GSM6406060
	5404	C2	ITG	TC	L4_6	GSM6146424				4246	C2	A44-A45	FC	Lamp5	GSM7300903			2792	B2	A44-A45	FC	L2/3-IT	GSM6406063
	5405	C2	ITG	TC	L4_6	GSM6146442				4247	C2	A44-A45	FC	Sst	GSM7300904			2802	B2	A44-A45	FC	L2/3-IT	GSM6406079
	5359	C2	ITG	TC	L4_6	GSM6146448				4273	C2	A44-A45	FC	Sncg	GSM7301091			2771	B2	A44-A45	FC	L2/3-IT	GSM6406028
	5443	C2	ITG	TC	L4_6	GSM6146591				4275	C2	A44-A45	FC	Sncg	GSM7301106			2772	B2	A44-A45	FC	L2/3-IT	GSM6406029
	5354	C2	ITG	TC	L4_6	GSM6146365				4277	C2	A44-A45	FC	Sst	GSM7301124			2778	B2	A44-A45	FC	L2/3-IT	GSM6406038
	5365	C2	ITG	TC	L4_6	GSM6146636				4281	C2	A44-A45	FC	Lamp5	GSM7301140			2787	B2	A44-A45	FC	L2/3-IT	GSM6406054
	5412	C2	ITG	TC	L4_6	GSM6146666				4307	C2	A44-A45	FC	Vip	GSM7301804			2773	B2	A44-A45	FC	L2/3-IT	GSM6406030
	5430	C2	ITG	TC	L4_6	GSM6148573				4331	C2	A44-A45	FC	Vip	GSM7302153			2803	B2	A44-A45	FC	L2/3-IT	GSM6406080
	5440	C2	ITG	TC	L4_6	GSM6146496				4348	C2	A44-A45	FC	Lamp5	GSM7302246			2789	B2	A44-A45	FC	L2/3-IT	GSM6406059
	5444	C2	ITG	TC	L4_6	GSM6146650				4349	C2	A44-A45	FC	Vip	GSM7302251			2816	B2	A44-A45	FC	L2/3-IT	GSM6406122
	5251	C2	ITG	TC	L2/3-IT	GSM6146337				4360	C2	A44-A45	FC	Sst	GSM7302313			2797	B2	A44-A45	FC	L2/3-IT	GSM6406070
	5249	C2	ITG	TC	L2/3-IT	GSM6146330				4364	C2	A44-A45	FC	Pvalb	GSM7302325			2805	B2	A44-A45	FC	L2/3-IT	GSM6406087
	5273	C2	ITG	TC	L2/3-IT	GSM6146556				4373	C2	A44-A45	FC	Pvalb	GSM7302377			2806	B2	A44-A45	FC	L2/3-IT	GSM6406094
	5266	C2	ITG	TC	L2/3-IT	GSM6146500				4374	C2	A44-A45	FC	Lamp5	GSM7302381			2812	B2	A44-A45	FC	L2/3-IT	GSM6406110
	5245	C2	ITG	TC	L2/3-IT	GSM6146299				4381	C2	A44-A45	FC	Sst	GSM7302788			3223	B3	DGC	HIP	DG	GSM6525627
	5247	C2	ITG	TC	L2/3-IT	GSM6146327				4389	C2	A44-A45	FC	Vip	GSM7302828			3373	B3	DGC	HIP	DG	GSM6526331
	5270	C2	ITG	TC	L2/3-IT	GSM6146536				4391	C2	A44-A45	FC	Sncg	GSM7302837			3210	B3	DGC	HIP	DG	GSM6525583
	5260	C2	ITG	TC	L2/3-IT	GSM6146393				4401	C2	A44-A45	FC	Sncg	GSM7302898			3138	B3	DGC	HIP	DG	GSM6525196
	5254	C2	ITG	TC	L2/3-IT	GSM6146373				4409	C2	A44-A45	FC	Sncg	GSM7302950			3307	B3	DGC	HIP	DG	GSM6525957
	5259	C2	ITG	TC	L2/3-IT	GSM6146389				4413	C2	A44-A45	FC	Pvalb	GSM7302965			3298	B3	DGC	HIP	DG	GSM6525938
	5271	C2	ITG	TC	L2/3-IT	GSM6146549				4415	C2	A44-A45	FC	Lamp5	GSM7302973			3105	B3	DGC	HIP	DG	GSM6524334
	5244	C2	ITG	TC	L2/3-IT	GSM6146295				4417	C2	A44-A45	FC	Pvalb	GSM7302981			3303	B3	DGC	HIP	DG	GSM6525949
	5332	C2	ITG	TC	L2/3-IT	GSM6148069				4427	C2	A44-A45	FC	Pvalb	GSM7303073			3034	B3	DGC	HIP	DG	GSM6524068
	5281	C2	ITG	TC	L2/3-IT	GSM6146658				4437	C2	A44-A45	FC	Vip	GSM7303119			3294	B3	DGC	HIP	DG	GSM6525931
	5256	C2	ITG	TC	L2/3-IT	GSM6146377				4441	C2	A44-A45	FC	ODC	GSM7302971			3200	B3	DGC	HIP	DG	GSM6525554
	5263	C2	ITG	TC	L2/3-IT	GSM6146484				4446	C2	A44-A45	FC	L4_6	GSM7300897			3305	B3	DGC	HIP	DG	GSM6525953
	5257	C2	ITG	TC	L2/3-IT	GSM6146382				4459	C2	A44-A45	FC	L2/3-IT	GSM7300924			3302	B3	DGC	HIP	DG	GSM6525943
	5261	C2	ITG	TC	L2/3-IT	GSM6146416				4461	C2	A44-A45	FC	L4_6	GSM7300931			3433	B3	DGC	HIP	DG	GSM6526627
	5294	C2	ITG	TC	L2/3-IT	GSM6146806				4463	C2	A44-A45	FC	L2/3-IT	GSM7300941			3055	B3	DGC	HIP	DG	GSM6524098
	5265	C2	ITG	TC	L2/3-IT	GSM6146489				4471	C2	A44-A45	FC	L2/3-IT	GSM7300969			3491	B3	DGC	HIP	DG	GSM6526946
	5316	C2	ITG	TC	L2/3-IT	GSM6147411				4480	C2	A44-A45	FC	L4_6	GSM7300990			3431	B3	DGC	HIP	DG	GSM6526537
	5278	C2	ITG	TC	L2/3-IT	GSM6146611				4484	C2	A44-A45	FC	L2/3-IT	GSM7301024			3053	B3	DGC	HIP	DG	GSM6524096
	5297	C2	ITG	TC	L2/3-IT	GSM6146823				4494	C2	A44-A45	FC	L2/3-IT	GSM7301044			3454	B3	DGC	HIP	CA	GSM6526791
	5264	C2	ITG	TC	L2/3-IT	GSM6146486				4497	C2	A44-A45	FC	L4_6	GSM7301052			3306	B3	DGC	HIP	CA	GSM6525954
	5288	C2	ITG	TC	L2/3-IT	GSM6146773				4502	C2	A44-A45	FC	L4_6	GSM7301075			3146	B3	DGC	HIP	CA	GSM6525375
	5210	C2	ITG	TC	ASC	GSM6146385				4507	C2	A44-A45	FC	L2/3-IT	GSM7301092			3308	B3	DGC	HIP	CA	GSM6525958
	5212	C2	ITG	TC	ASC	GSM6146778				4519	C2	A44-A45	FC	L2/3-IT	GSM7301108			3291	B3	DGC	HIP	CA	GSM6525927
	5234	C2	ITG	TC	OPC	GSM6146758				4536	C2	A44-A45	FC	L2/3-IT	GSM7301148			3386	B3	DGC	HIP	CA	GSM6526351
	5233	C2	ITG	TC	ODC	GSM6149070				4540	C2	A44-A45	FC	L2/3-IT	GSM7301158			3285	B3	DGC	HIP	CA	GSM6525918
	5218	C2	ITG	TC	ODC	GSM6146370				4544	C2	A44-A45	FC	L2/3-IT	GSM7301163			3466	B3	DGC	HIP	CA	GSM6526847
	5221	C2	ITG	TC	ODC	GSM6146503				4545	C2	A44-A45	FC	L2/3-IT	GSM7301165			3370	B3	DGC	HIP	CA	GSM6526318
	5220	C2	ITG	TC	ODC	GSM6146502				4555	C2	A44-A45	FC	L4_6	GSM7301272			3309	B3	DGC	HIP	CA	GSM6525962
	5219	C2	ITG	TC	ODC	GSM6146482				4558	C2	A44-A45	FC	L4_6	GSM7301276			3033	B3	DGC	HIP	CA	GSM6524065
	6758	D1	PN	BS	PN	GSM6016567				4568	C2	A44-A45	FC	L2/3-IT	GSM7301305			3035	B3	DGC	HIP	CA	GSM6524069
	6762	D1	PN	BS	PN	GSM6016594				4574	C2	A44-A45	FC	L2/3-IT	GSM7301319			3617	B4	PN	BS	PN	GSM6547871
	6749	D1	PN	BS	PN	GSM6016436				4575	C2	A44-A45	FC	L2/3-IT	GSM7301320			3795	B4	PN	BS	PN	GSM6549172
	7133	D1	PN	BS	PN	GSM6018389				4604	C2	A44-A45	FC	L4_6	GSM7301718			3580	B4	PN	BS	PN	GSM6547793
	6956	D1	PN	BS	PN	GSM6017039				4624	C2	A44-A45	FC	L4_6	GSM7302124			3654	B4	PN	BS	PN	GSM6548168
	6983	D1	PN	BS	PN	GSM6017075				4646	C2	A44-A45	FC	L4_6	GSM7302187			3799	B4	PN	BS	PN	GSM6549466
	6873	D1	PN	BS	PN	GSM6016886				4653	C2	A44-A45	FC	L4_6	GSM7302210			3800	B4	PN	BS	PN	GSM6549467
	6869	D1	PN	BS	PN	GSM6016880				4662	C2	A44-A45	FC	L2/3-IT	GSM7302249			3559	B4	PN	BS	PN	GSM6547763
	6934	D1	PN	BS	PN	GSM6017008				4681	C2	A44-A45	FC	L2/3-IT	GSM7302289			3765	B4	PN	BS	PN	GSM6548647
	6875	D1	PN	BS	PN	GSM6016888				4685	C2	A44-A45	FC	L4_6	GSM7302302			3574	B4	PN	BS	PN	GSM6547782
	6962	D1	PN	BS	PN	GSM6017047				4690	C2	A44-A45	FC	L4_6	GSM7302318			3645	B4	PN	BS	PN	GSM6547940
	7115	D1	PN	BS	PN	GSM6018151				4696	C2	A44-A45	FC	L4_6	GSM7302332			3555	B4	PN	BS	PN	GSM6547759
	6852	D1	PN	BS	PN	GSM6016858				4699	C2	A44-A45	FC	L2/3-IT	GSM7302337			3792	B4	PN	BS	PN	GSM6549156
	8108	D3	A46	FC	Lamp5	GSM6790079				4709	C2	A44-A45	FC	L4_6	GSM7302361			3561	B4	PN	BS	PN	GSM6547766
	8087	D3	A46	FC	Lamp5	GSM6789219				4712	C2	A44-A45	FC	L4_6	GSM7302369			3578	B4	PN	BS	PN	GSM6547786
	8124	D3	A46	FC	Lamp5	GSM6790214				4715	C2	A44-A45	FC	L4_6	GSM7302498			3639	B4	PN	BS	PN	GSM6547918
	8114	D3	A46	FC	Lamp5	GSM6789999				4729	C2	A44-A45	FC	L2/3-IT	GSM7302781			3711	B4	PN	BS	PN	GSM6548510
	8086	D3	A46	FC	Lamp5	GSM6789040				4739	C2	A44-A45	FC	L4_6	GSM7302818			3897	B4	PN	BS	PN	GSM6550306
	8218	D3	A46	FC	Sncg	GSM6791921				4741	C2	A44-A45	FC	L4_6	GSM7302825			3541	B4	PN	BS	PN	GSM6547735
	8214	D3	A46	FC	Sncg	GSM6791286				4748	C2	A44-A45	FC	L2/3-IT	GSM7302841			3544	B4	PN	BS	PN	GSM6547739
	8222	D3	A46	FC	Sncg	GSM6790386				4753	C2	A44-A45	FC	L2/3-IT	GSM7302851			3635	B4	PN	BS	PN	GSM6547903
	8201	D3	A46	FC	Sncg	GSM6789163				4785	C2	A44-A45	FC	L2/3-IT	GSM7302954			3722	B4	PN	BS	PN	GSM6548532
	8217	D3	A46	FC	Sncg	GSM6791829				4786	C2	A44-A45	FC	L4_6	GSM7302959			3565	B4	PN	BS	PN	GSM6547770
	8320	D3	A46	FC	Vip	GSM6791423				4787	C2	A44-A45	FC	L4_6	GSM7302961			3630	B4	PN	BS	PN	GSM6547895
	8325	D3	A46	FC	Vip	GSM6790014				4791	C2	A44-A45	FC	L4_6	GSM7302969			3653	B4	PN	BS	PN	GSM6547959
	8312	D3	A46	FC	Vip	GSM6789076				4804	C2	A44-A45	FC	L4_6	GSM7302992			3640	B4	PN	BS	PN	GSM6547921
	8333	D3	A46	FC	Vip	GSM6790599				4810	C2	A44-A45	FC	L4_6	GSM7303048			3976	B4	PN	BS	ODC	GSM6549676
	8314	D3	A46	FC	Vip	GSM6789392				4812	C2	A44-A45	FC	L2/3-IT	GSM7303052			3946	B4	PN	BS	ODC	GSM6547957
	8274	D3	A46	FC	Sst	GSM6789981				4816	C2	A44-A45	FC	L2/3-IT	GSM7303060			3939	B4	PN	BS	ODC	GSM6547933
	8291	D3	A46	FC	Sst	GSM6789602				4830	C2	A44-A45	FC	L2/3-IT	GSM7303095			3955	B4	PN	BS	ODC	GSM6548637
	8251	D3	A46	FC	Sst	GSM6790293				4831	C2	A44-A45	FC	L2/3-IT	GSM7303097			3978	B4	PN	BS	ODC	GSM6549702
	8245	D3	A46	FC	Sst	GSM6791526				5604	C4	CA1C	HIP	CA	GSM6002025			3945	B4	PN	BS	ODC	GSM6547953
	8235	D3	A46	FC	Sst	GSM6791864				5635	C4	CA1C	HIP	CA	GSM6002248			3959	B4	PN	BS	ODC	GSM6548653
	8166	D3	A46	FC	Pvalb	GSM6790073				5650	C4	CA1C	HIP	CA	GSM6002370			3944	B4	PN	BS	ODC	GSM6547952
	8156	D3	A46	FC	Pvalb	GSM6789224				5730	C4	CA1C	HIP	CA	GSM6003873			3967	B4	PN	BS	OPC	GSM6548990
	8182	D3	A46	FC	Pvalb	GSM6788987				6284	D2	A46	FC	Vip	GSM6793644			4106	C1	DGR	HIP	DG	GSM6561199
	8137	D3	A46	FC	Pvalb	GSM6791418				6288	D2	A46	FC	Vip	GSM6793687			4256	C1	DGR	HIP	DG	GSM6562761
	8154	D3	A46	FC	Pvalb	GSM6789187				6293	D2	A46	FC	Pvalb	GSM6793750			4174	C1	DGR	HIP	DG	GSM6561720
	8705	D3	A46	FC	L4_6	GSM6791550				6298	D2	A46	FC	Sst	GSM6793768			4255	C1	DGR	HIP	DG	GSM6562759
	8647	D3	A46	FC	L4_6	GSM6791349				6307	D2	A46	FC	Sncg	GSM6793854			4332	C1	DGR	HIP	DG	GSM6563276
	8881	D3	A46	FC	L4_6	GSM6791279				6309	D2	A46	FC	Sncg	GSM6793974			4308	C1	DGR	HIP	DG	GSM6563180
	8888	D3	A46	FC	L4_6	GSM6791222				6317	D2	A46	FC	Sncg	GSM6794092			4243	C1	DGR	HIP	DG	GSM6562561
	8689	D3	A46	FC	L4_6	GSM6791088				6319	D2	A46	FC	Sst	GSM6794122			4136	C1	DGR	HIP	DG	GSM6561356
	8880	D3	A46	FC	L4_6	GSM6791069				6335	D2	A46	FC	Lamp5	GSM6794385			4113	C1	DGR	HIP	DG	GSM6561217
	8884	D3	A46	FC	L4_6	GSM6791870				6336	D2	A46	FC	Sst	GSM6794386			4195	C1	DGR	HIP	DG	GSM6561774
	8785	D3	A46	FC	L4_6	GSM6790029				6339	D2	A46	FC	Sncg	GSM6794403			4363	C1	DGR	HIP	DG	GSM6563552
	8829	D3	A46	FC	L4_6	GSM6789993				6341	D2	A46	FC	Lamp5	GSM6794469			4151	C1	DGR	HIP	DG	GSM6561637
	8819	D3	A46	FC	L4_6	GSM6789879				6354	D2	A46	FC	Pvalb	GSM6794775			4333	C1	DGR	HIP	DG	GSM6563297
	8869	D3	A46	FC	L4_6	GSM6789102				6363	D2	A46	FC	Pvalb	GSM6794935			4135	C1	DGR	HIP	DG	GSM6561355
	8886	D3	A46	FC	L4_6	GSM6789988				6364	D2	A46	FC	Vip	GSM6794940			4110	C1	DGR	HIP	DG	GSM6561205
	8859	D3	A46	FC	L4_6	GSM6790088				6365	D2	A46	FC	Lamp5	GSM6794942			4116	C1	DGR	HIP	DG	GSM6561232
	8841	D3	A46	FC	L4_6	GSM6790038				6383	D2	A46	FC	Pvalb	GSM6795257			4320	C1	DGR	HIP	DG	GSM6563228
	8860	D3	A46	FC	L4_6	GSM6790539				6394	D2	A46	FC	Lamp5	GSM6795499			4339	C1	DGR	HIP	DG	GSM6563304
	8786	D3	A46	FC	L4_6	GSM6790040				6395	D2	A46	FC	Pvalb	GSM6795504			4394	C1	DGR	HIP	DG	GSM6563933
	8643	D3	A46	FC	L4_6	GSM6790167				6398	D2	A46	FC	Lamp5	GSM6795536			4322	C1	DGR	HIP	DG	GSM6563236
	8736	D3	A46	FC	L4_6	GSM6791404				6404	D2	A46	FC	Vip	GSM6795704			4324	C1	DGR	HIP	CA	GSM6563240
	8778	D3	A46	FC	L4_6	GSM6789462				6410	D2	A46	FC	Sst	GSM6795877			4148	C1	DGR	HIP	CA	GSM6561465
	8883	D3	A46	FC	L4_6	GSM6791587				6415	D2	A46	FC	Lamp5	GSM6796006			4192	C1	DGR	HIP	CA	GSM6561771
	8664	D3	A46	FC	L4_6	GSM6789203				6416	D2	A46	FC	Pvalb	GSM6796017			4105	C1	DGR	HIP	CA	GSM6561198
	8677	D3	A46	FC	L4_6	GSM6789199				6419	D2	A46	FC	Sst	GSM6796133			4129	C1	DGR	HIP	CA	GSM6561335
	8640	D3	A46	FC	L4_6	GSM6790008				6429	D2	A46	FC	Lamp5	GSM6796218			4150	C1	DGR	HIP	CA	GSM6561633
	8684	D3	A46	FC	L4_6	GSM6789861				6430	D2	A46	FC	Vip	GSM6796226			4159	C1	DGR	HIP	CA	GSM6561668
	8673	D3	A46	FC	L4_6	GSM6790378				6431	D2	A46	FC	Vip	GSM6796250			4340	C1	DGR	HIP	CA	GSM6563305
	8851	D3	A46	FC	L4_6	GSM6789209				6436	D2	A46	FC	Sst	GSM6796283			4107	C1	DGR	HIP	CA	GSM6561200
	8509	D3	A46	FC	L2/3-IT	GSM6790065				6438	D2	A46	FC	Vip	GSM6796365			4354	C1	DGR	HIP	CA	GSM6563512
	8483	D3	A46	FC	L2/3-IT	GSM6789977				6439	D2	A46	FC	Sst	GSM6796383			4293	C1	DGR	HIP	CA	GSM6563135
	8449	D3	A46	FC	L2/3-IT	GSM6791617				6451	D2	A46	FC	Sncg	GSM6796565			4329	C1	DGR	HIP	CA	GSM6563273
	8513	D3	A46	FC	L2/3-IT	GSM6790447				6459	D2	A46	FC	ODC	GSM6793612			4165	C1	DGR	HIP	CA	GSM6561695
	8500	D3	A46	FC	L2/3-IT	GSM6789225				6461	D2	A46	FC	OPC	GSM6793684			4338	C1	DGR	HIP	CA	GSM6563303
	8543	D3	A46	FC	L2/3-IT	GSM6789280				6462	D2	A46	FC	ASC	GSM6793711			4315	C1	DGR	HIP	CA	GSM6563204
	8540	D3	A46	FC	L2/3-IT	GSM6789210				6467	D2	A46	FC	OPC	GSM6794015			4119	C1	DGR	HIP	CA	GSM6561305
	8451	D3	A46	FC	L2/3-IT	GSM6791843				6477	D2	A46	FC	OPC	GSM6794440			4262	C1	DGR	HIP	CA	GSM6562810
	8566	D3	A46	FC	L2/3-IT	GSM6790361				6484	D2	A46	FC	ASC	GSM6794769			4699	C3	V1C	OC	Vip	GSM6842818
	8586	D3	A46	FC	L2/3-IT	GSM6791495				6486	D2	A46	FC	ODC	GSM6794783			4668	C3	V1C	OC	Vip	GSM6842439
	8473	D3	A46	FC	L2/3-IT	GSM6791910				6489	D2	A46	FC	ODC	GSM6794815			4691	C3	V1C	OC	Vip	GSM6842681
	8444	D3	A46	FC	L2/3-IT	GSM6790389				6498	D2	A46	FC	ASC	GSM6795253			4714	C3	V1C	OC	Vip	GSM6843104
	8584	D3	A46	FC	L2/3-IT	GSM6791441				6502	D2	A46	FC	ASC	GSM6795350			4681	C3	V1C	OC	Vip	GSM6842537
	8474	D3	A46	FC	L2/3-IT	GSM6789011				6503	D2	A46	FC	OPC	GSM6795369			4646	C3	V1C	OC	Vip	GSM6842071
	8481	D3	A46	FC	L2/3-IT	GSM6789884				6504	D2	A46	FC	ODC	GSM6795413			4619	C3	V1C	OC	Vip	GSM6841895
	8598	D3	A46	FC	L2/3-IT	GSM6791940				6510	D2	A46	FC	ASC	GSM6795460			4617	C3	V1C	OC	Vip	GSM6841838
	8548	D3	A46	FC	L2/3-IT	GSM6789564				6521	D2	A46	FC	OPC	GSM6795878			4696	C3	V1C	OC	Sst	GSM6842718
	8578	D3	A46	FC	L2/3-IT	GSM6790853				6522	D2	A46	FC	OPC	GSM6795897			4667	C3	V1C	OC	Sst	GSM6842431
	8454	D3	A46	FC	L2/3-IT	GSM6791253				6524	D2	A46	FC	ODC	GSM6796001			4680	C3	V1C	OC	Sst	GSM6842532
	8462	D3	A46	FC	L2/3-IT	GSM6789635				6527	D2	A46	FC	ASC	GSM6796188			4643	C3	V1C	OC	Sst	GSM6842062
	8440	D3	A46	FC	L2/3-IT	GSM6790238				6534	D2	A46	FC	ODC	GSM6796402			4639	C3	V1C	OC	Sst	GSM6842039
	8457	D3	A46	FC	L2/3-IT	GSM6788980				6540	D2	A46	FC	ODC	GSM6796496			4720	C3	V1C	OC	Sst	GSM6843126
	8501	D3	A46	FC	L2/3-IT	GSM6789231				6544	D2	A46	FC	ODC	GSM6796553			4693	C3	V1C	OC	Sst	GSM6842691
	8518	D3	A46	FC	L2/3-IT	GSM6790822				6551	D2	A46	FC	L2/3-IT	GSM6793609			4799	C3	V1C	OC	Sncg	GSM6844320
	8531	D3	A46	FC	L2/3-IT	GSM6788955				6568	D2	A46	FC	L4_6	GSM6793677			4674	C3	V1C	OC	Sncg	GSM6842485
	8576	D3	A46	FC	L2/3-IT	GSM6790804				6572	D2	A46	FC	L4_6	GSM6793690			4727	C3	V1C	OC	Sncg	GSM6843219
	8544	D3	A46	FC	L2/3-IT	GSM6789471				6575	D2	A46	FC	L2/3-IT	GSM6793720			4671	C3	V1C	OC	Sncg	GSM6842455
	8370	D3	A46	FC	ASC_2	GSM6791314				6580	D2	A46	FC	L2/3-IT	GSM6793747			4683	C3	V1C	OC	Sncg	GSM6842541
	8361	D3	A46	FC	ASC_0	GSM6790373				6581	D2	A46	FC	L2/3-IT	GSM6793752			4802	C3	V1C	OC	Sncg	GSM6844368
	8366	D3	A46	FC	ASC_1	GSM6789984				6590	D2	A46	FC	L4_6	GSM6793827			4637	C3	V1C	OC	Sncg	GSM6842027
	8358	D3	A46	FC	ASC_0	GSM6790005				6591	D2	A46	FC	L2/3-IT	GSM6793835			4633	C3	V1C	OC	Sncg	GSM6842008
	8354	D3	A46	FC	ASC_0	GSM6789455				6592	D2	A46	FC	L4_6	GSM6793838			4678	C3	V1C	OC	Pvalb	GSM6842509
	8369	D3	A46	FC	ASC_2	GSM6789220				6598	D2	A46	FC	L4_6	GSM6794012			4620	C3	V1C	OC	Pvalb	GSM6841921
	8353	D3	A46	FC	ASC_0	GSM6789099				6601	D2	A46	FC	L4_6	GSM6794026			4719	C3	V1C	OC	Pvalb	GSM6843116
	8430	D3	A46	FC	OPC_0	GSM6791459				6603	D2	A46	FC	L4_6	GSM6794045			4654	C3	V1C	OC	Pvalb	GSM6842150
	8426	D3	A46	FC	OPC_0	GSM6790075				6604	D2	A46	FC	L2/3-IT	GSM6794059			4621	C3	V1C	OC	Pvalb	GSM6841953
	8431	D3	A46	FC	OPC_0	GSM6791865				6605	D2	A46	FC	L4_6	GSM6794074			4808	C3	V1C	OC	Pvalb	GSM6844997
	8428	D3	A46	FC	OPC_0	GSM6791277				6607	D2	A46	FC	L4_6	GSM6794091			4669	C3	V1C	OC	Pvalb	GSM6842445
	8427	D3	A46	FC	OPC_0	GSM6790465				6611	D2	A46	FC	L2/3-IT	GSM6794124			4834	C3	V1C	OC	ODC	GSM6843681
	8429	D3	A46	FC	OPC_0	GSM6791458				6624	D2	A46	FC	L4_6	GSM6794222			4820	C3	V1C	OC	ODC	GSM6842123
	8373	D3	A46	FC	ODC_0	GSM6789201				6631	D2	A46	FC	L4_6	GSM6794273			4815	C3	V1C	OC	ODC	GSM6842045
	8376	D3	A46	FC	ODC_0	GSM6790080				6644	D2	A46	FC	L2/3-IT	GSM6794507			4839	C3	V1C	OC	ODC	GSM6843999
	8425	D3	A46	FC	ODC_1	GSM6791879				6647	D2	A46	FC	L2/3-IT	GSM6794518			4826	C3	V1C	OC	ODC	GSM6842676
	8420	D3	A46	FC	ODC_1	GSM6791534				6648	D2	A46	FC	L2/3-IT	GSM6794520			4827	C3	V1C	OC	ASC	GSM6842696
	8389	D3	A46	FC	ODC_0	GSM6791774				6649	D2	A46	FC	L4_6	GSM6794522			4855	C3	V1C	OC	ASC	GSM6844973
	8401	D3	A46	FC	ODC_1	GSM6789844				6651	D2	A46	FC	L2/3-IT	GSM6794544			4852	C3	V1C	OC	ASC	GSM6844950
	8409	D3	A46	FC	ODC_1	GSM6790314				6652	D2	A46	FC	L2/3-IT	GSM6794550			4822	C3	V1C	OC	ASC	GSM6842255
	8897	D4	MTG	TC	Lamp5	GSM6799788				6666	D2	A46	FC	L4_6	GSM6794786			4819	C3	V1C	OC	ASC	GSM6842103
	8904	D4	MTG	TC	Lamp5	GSM6798876				6672	D2	A46	FC	L2/3-IT	GSM6794797			4824	C3	V1C	OC	ASC	GSM6842611
	8912	D4	MTG	TC	Lamp5	GSM6799668				6673	D2	A46	FC	L2/3-IT	GSM6794806			4836	C3	V1C	OC	OPC	GSM6843804
	8906	D4	MTG	TC	Lamp5	GSM6799798				6676	D2	A46	FC	L4_6	GSM6794810			4679	C3	V1C	OC	Lamp5	GSM6842525
	8911	D4	MTG	TC	Lamp5	GSM6799058				6679	D2	A46	FC	L2/3-IT	GSM6794819			4623	C3	V1C	OC	Lamp5	GSM6841959
	8971	D4	MTG	TC	Sncg	GSM6799571				6680	D2	A46	FC	L2/3-IT	GSM6794828			4672	C3	V1C	OC	Lamp5	GSM6842462
	8965	D4	MTG	TC	Sncg	GSM6799601				6681	D2	A46	FC	L2/3-IT	GSM6794885			4697	C3	V1C	OC	Lamp5	GSM6842733
	8970	D4	MTG	TC	Sncg	GSM6799035				6682	D2	A46	FC	L2/3-IT	GSM6794891			4713	C3	V1C	OC	Lamp5	GSM6843101
	8974	D4	MTG	TC	Sncg	GSM6799531				6684	D2	A46	FC	L2/3-IT	GSM6794897			4636	C3	V1C	OC	Lamp5	GSM6842025
	8980	D4	MTG	TC	Sncg	GSM6799578				6691	D2	A46	FC	L4_6	GSM6794917			4703	C3	V1C	OC	Lamp5	GSM6842875
	8977	D4	MTG	TC	Sncg	GSM6798613				6694	D2	A46	FC	L4_6	GSM6794929			5124	C3	V1C	OC	L4_6	GSM6843202
	9101	D4	MTG	TC	Vip	GSM6799965				6695	D2	A46	FC	L4_6	GSM6794932			4857	C3	V1C	OC	L4_6	GSM6841807
	9080	D4	MTG	TC	Vip	GSM6799759				6696	D2	A46	FC	L2/3-IT	GSM6794939			5082	C3	V1C	OC	L4_6	GSM6842845
	9085	D4	MTG	TC	Vip	GSM6799031				6698	D2	A46	FC	L2/3-IT	GSM6794946			4962	C3	V1C	OC	L4_6	GSM6842209
	9112	D4	MTG	TC	Vip	GSM6799632				6704	D2	A46	FC	L4_6	GSM6795038			5142	C3	V1C	OC	L4_6	GSM6843337
	9089	D4	MTG	TC	Vip	GSM6799586				6711	D2	A46	FC	L2/3-IT	GSM6795264			4910	C3	V1C	OC	L4_6	GSM6842011
	9021	D4	MTG	TC	Sst	GSM6799570				6717	D2	A46	FC	L4_6	GSM6795357			5086	C3	V1C	OC	L4_6	GSM6842854
	9007	D4	MTG	TC	Sst	GSM6798330				6718	D2	A46	FC	L4_6	GSM6795358			5024	C3	V1C	OC	L4_6	GSM6842533
	9056	D4	MTG	TC	Sst	GSM6799679				6724	D2	A46	FC	L4_6	GSM6795389			5071	C3	V1C	OC	L4_6	GSM6842736
	9059	D4	MTG	TC	Sst	GSM6800525				6725	D2	A46	FC	L4_6	GSM6795395			4949	C3	V1C	OC	L4_6	GSM6842153
	9048	D4	MTG	TC	Sst	GSM6798949				6727	D2	A46	FC	L4_6	GSM6795438			5128	C3	V1C	OC	L4_6	GSM6843223
	8938	D4	MTG	TC	Pvalb	GSM6798456				6728	D2	A46	FC	L2/3-IT	GSM6795443			4992	C3	V1C	OC	L4_6	GSM6842436
	8924	D4	MTG	TC	Pvalb	GSM6798789				6733	D2	A46	FC	L2/3-IT	GSM6795461			4988	C3	V1C	OC	L4_6	GSM6842432
	8929	D4	MTG	TC	Pvalb	GSM6798892				6734	D2	A46	FC	L4_6	GSM6795464			5011	C3	V1C	OC	L4_6	GSM6842492
	8933	D4	MTG	TC	Pvalb	GSM6799025				6738	D2	A46	FC	L4_6	GSM6795485			4986	C3	V1C	OC	L4_6	GSM6842427
	8946	D4	MTG	TC	Pvalb	GSM6799822				6749	D2	A46	FC	L2/3-IT	GSM6795755			4920	C3	V1C	OC	L4_6	GSM6842041
	9378	D4	MTG	TC	L4_6	GSM6800146				6758	D2	A46	FC	L4_6	GSM6795879			5270	C3	V1C	OC	L4_6	GSM6844375
	9412	D4	MTG	TC	L4_6	GSM6798617				6761	D2	A46	FC	L2/3-IT	GSM6795987			5044	C3	V1C	OC	L4_6	GSM6842682
	9394	D4	MTG	TC	L4_6	GSM6799195				6766	D2	A46	FC	L2/3-IT	GSM6796018			5047	C3	V1C	OC	L4_6	GSM6842688
	9401	D4	MTG	TC	L4_6	GSM6798784				6778	D2	A46	FC	L4_6	GSM6796176			5114	C3	V1C	OC	L4_6	GSM6843117
	9469	D4	MTG	TC	L4_6	GSM6798373				6794	D2	A46	FC	L4_6	GSM6796257			5055	C3	V1C	OC	L4_6	GSM6842705
	9448	D4	MTG	TC	L4_6	GSM6798853				6804	D2	A46	FC	L2/3-IT	GSM6796465			4884	C3	V1C	OC	L4_6	GSM6841904
	9363	D4	MTG	TC	L4_6	GSM6799194				6810	D2	A46	FC	L2/3-IT	GSM6796560			5156	C3	V1C	OC	L4_6	GSM6843552
	9449	D4	MTG	TC	L4_6	GSM6798931				6811	D2	A46	FC	L4_6	GSM6796582			5068	C3	V1C	OC	L4_6	GSM6842729
	9435	D4	MTG	TC	L4_6	GSM6799573				6819	D2	A46	FC	L2/3-IT	GSM6796631			5102	C3	V1C	OC	L4_6	GSM6843029
	9393	D4	MTG	TC	L4_6	GSM6798845				8870	E3	DGR	HIP	DG	GSM5863131			5290	C3	V1C	OC	L2/3-IT	GSM6844967
	9365	D4	MTG	TC	L4_6	GSM6799270				8871	E3	DGR	HIP	DG	GSM5863163			5241	C3	V1C	OC	L2/3-IT	GSM6844209
	9357	D4	MTG	TC	L4_6	GSM6798867				8872	E3	DGR	HIP	DG	GSM5863210			4973	C3	V1C	OC	L2/3-IT	GSM6842308
	9379	D4	MTG	TC	L4_6	GSM6800209				8918	E3	DGR	HIP	DG	GSM5863992			5010	C3	V1C	OC	L2/3-IT	GSM6842490
	9423	D4	MTG	TC	L4_6	GSM6799701				8920	E3	DGR	HIP	CA	GSM5864078			5164	C3	V1C	OC	L2/3-IT	GSM6843583
	9441	D4	MTG	TC	L4_6	GSM6798323				8984	E3	DGR	HIP	CA	GSM5864315			5146	C3	V1C	OC	L2/3-IT	GSM6843441
	9429	D4	MTG	TC	L4_6	GSM6799612				8998	E3	DGR	HIP	CA	GSM5864351			4948	C3	V1C	OC	L2/3-IT	GSM6842141
	9440	D4	MTG	TC	L4_6	GSM6798844				9000	E3	DGR	HIP	CA	GSM5864356			5019	C3	V1C	OC	L2/3-IT	GSM6842521
	9434	D4	MTG	TC	L4_6	GSM6798868				9003	E3	DGR	HIP	CA	GSM5864363			5230	C3	V1C	OC	L2/3-IT	GSM6844162
	9355	D4	MTG	TC	L4_6	GSM6798767				9053	E3	DGR	HIP	DG	GSM5865600			4947	C3	V1C	OC	L2/3-IT	GSM6842134
	9358	D4	MTG	TC	L4_6	GSM6798873				9068	E3	DGR	HIP	DG	GSM5865620			5076	C3	V1C	OC	L2/3-IT	GSM6842815
	9456	D4	MTG	TC	L4_6	GSM6800917				9103	E3	DGR	HIP	DG	GSM5865662			4901	C3	V1C	OC	L2/3-IT	GSM6841973
	9428	D4	MTG	TC	L4_6	GSM6799566				9127	E3	DGR	HIP	DG	GSM5865697			4942	C3	V1C	OC	L2/3-IT	GSM6842116
	9367	D4	MTG	TC	L4_6	GSM6799629				9133	E3	DGR	HIP	DG	GSM5865704			5014	C3	V1C	OC	L2/3-IT	GSM6842501
	9191	D4	MTG	TC	L2/3-IT	GSM6799806				9138	E3	DGR	HIP	DG	GSM5865710			5234	C3	V1C	OC	L2/3-IT	GSM6844175
	9300	D4	MTG	TC	L2/3-IT	GSM6799584				9139	E3	DGR	HIP	DG	GSM5865711			4921	C3	V1C	OC	L2/3-IT	GSM6842044
	9167	D4	MTG	TC	L2/3-IT	GSM6798337				9143	E3	DGR	HIP	CA	GSM5865718			5253	C3	V1C	OC	L2/3-IT	GSM6844291
	9282	D4	MTG	TC	L2/3-IT	GSM6799038				9164	E3	DGR	HIP	CA	GSM5865749			4906	C3	V1C	OC	L2/3-IT	GSM6841993
	9212	D4	MTG	TC	L2/3-IT	GSM6799018				9181	E3	DGR	HIP	CA	GSM5865773			4932	C3	V1C	OC	L2/3-IT	GSM6842094
	9279	D4	MTG	TC	L2/3-IT	GSM6798908				9193	E3	DGR	HIP	DG	GSM5865789			4987	C3	V1C	OC	L2/3-IT	GSM6842428
	9251	D4	MTG	TC	L2/3-IT	GSM6799050				9195	E3	DGR	HIP	DG	GSM5865791			4925	C3	V1C	OC	L2/3-IT	GSM6842058
	9310	D4	MTG	TC	L2/3-IT	GSM6799703				9198	E3	DGR	HIP	DG	GSM5865794			5141	C3	V1C	OC	L2/3-IT	GSM6843266
	9291	D4	MTG	TC	L2/3-IT	GSM6799202				9205	E3	DGR	HIP	DG	GSM5865806			5227	C3	V1C	OC	L2/3-IT	GSM6844107
	9265	D4	MTG	TC	L2/3-IT	GSM6798338				9218	E3	DGR	HIP	DG	GSM5865822			4955	C3	V1C	OC	L2/3-IT	GSM6842178
	9177	D4	MTG	TC	L2/3-IT	GSM6799789				9221	E3	DGR	HIP	DG	GSM5865826			5062	C3	V1C	OC	L2/3-IT	GSM6842715
	9302	D4	MTG	TC	L2/3-IT	GSM6799589				9223	E3	DGR	HIP	DG	GSM5865829			5132	C3	V1C	OC	L2/3-IT	GSM6843235
	9175	D4	MTG	TC	L2/3-IT	GSM6799183				9224	E3	DGR	HIP	DG	GSM5865831			5248	C3	V1C	OC	L2/3-IT	GSM6844257
	9190	D4	MTG	TC	L2/3-IT	GSM6799804				9229	E3	DGR	HIP	DG	GSM5865837			4872	C3	V1C	OC	L2/3-IT	GSM6841870
	9221	D4	MTG	TC	L2/3-IT	GSM6799609				9231	E3	DGR	HIP	DG	GSM5865840			4912	C3	V1C	OC	L2/3-IT	GSM6842016
	9287	D4	MTG	TC	L2/3-IT	GSM6799070				9239	E3	DGR	HIP	DG	GSM5865854			5225	C3	V1C	OC	L2/3-IT	GSM6844098
	9276	D4	MTG	TC	L2/3-IT	GSM6798870				9241	E3	DGR	HIP	DG	GSM5865856			4938	C3	V1C	OC	L2/3-IT	GSM6842109
	9318	D4	MTG	TC	L2/3-IT	GSM6800154				9243	E3	DGR	HIP	DG	GSM5865858			4867	C3	V1C	OC	L2/3-IT	GSM6841850
	9246	D4	MTG	TC	L2/3-IT	GSM6799767				9245	E3	DGR	HIP	DG	GSM5865862			4977	C3	V1C	OC	L2/3-IT	GSM6842330
	9296	D4	MTG	TC	L2/3-IT	GSM6799545				9252	E3	DGR	HIP	DG	GSM5865870			5013	C3	V1C	OC	L2/3-IT	GSM6842500
	9219	D4	MTG	TC	L2/3-IT	GSM6799559				9255	E3	DGR	HIP	DG	GSM5865874			5268	C3	V1C	OC	L2/3-IT	GSM6844370
	9230	D4	MTG	TC	L2/3-IT	GSM6800188				9264	E3	DGR	HIP	CA	GSM5865884			4874	C3	V1C	OC	L2/3-IT	GSM6841875
	9185	D4	MTG	TC	L2/3-IT	GSM6798482				9271	E3	DGR	HIP	CA	GSM5865891			5223	C3	V1C	OC	L2/3-IT	GSM6844087
	9332	D4	MTG	TC	L2/3-IT	GSM6798501				9278	E3	DGR	HIP	DG	GSM5865900			4998	C3	V1C	OC	L2/3-IT	GSM6842449
	9120	D4	MTG	TC	ASC_0	GSM6798334				9279	E3	DGR	HIP	DG	GSM5865901			5060	C3	V1C	OC	L2/3-IT	GSM6842712
	9121	D4	MTG	TC	ASC_0	GSM6798378				9282	E3	DGR	HIP	DG	GSM5865908			5056	C3	V1C	OC	L2/3-IT	GSM6842706
	9128	D4	MTG	TC	ASC_0	GSM6800387				9287	E3	DGR	HIP	DG	GSM5865915			5048	C3	V1C	OC	L2/3-IT	GSM6842690
	9129	D4	MTG	TC	ASC_0	GSM6800920				9288	E3	DGR	HIP	CA	GSM5865916			5271	C3	V1C	OC	L2/3-IT	GSM6844377
	9124	D4	MTG	TC	ASC_0	GSM6798856				9294	E3	DGR	HIP	CA	GSM5865923			5532	C4	CA1R	HIP	DG	GSM6556961
	9125	D4	MTG	TC	ASC_0	GSM6799028				9295	E3	DGR	HIP	DG	GSM5865925			5958	C4	CA1R	HIP	DG	GSM6558845
	9159	D4	MTG	TC	OPC_0	GSM6798864				9299	E3	DGR	HIP	CA	GSM5865929			5573	C4	CA1R	HIP	DG	GSM6557217
	9161	D4	MTG	TC	OPC_0	GSM6799543				9300	E3	DGR	HIP	DG	GSM5865930			5574	C4	CA1R	HIP	DG	GSM6557219
	9160	D4	MTG	TC	OPC_0	GSM6798933				9301	E3	DGR	HIP	DG	GSM5865932			5533	C4	CA1R	HIP	DG	GSM6556964
	9162	D4	MTG	TC	OPC_0	GSM6799644				9304	E3	DGR	HIP	DG	GSM5865937			5622	C4	CA1R	HIP	DG	GSM6557384
	9163	D4	MTG	TC	OPC_0	GSM6800358				9307	E3	DGR	HIP	DG	GSM5865941			6002	C4	CA1R	HIP	DG	GSM6559020
	9158	D4	MTG	TC	OPC_0	GSM6798484				9308	E3	DGR	HIP	DG	GSM5865942			5623	C4	CA1R	HIP	DG	GSM6557393
	9164	D4	MTG	TC	OPC_0	GSM6800458				9309	E3	DGR	HIP	DG	GSM5865943			5846	C4	CA1R	HIP	DG	GSM6558092
	9150	D4	MTG	TC	ODC_1	GSM6799057				9311	E3	DGR	HIP	CA	GSM5865945			5851	C4	CA1R	HIP	DG	GSM6558100
	9136	D4	MTG	TC	ODC_0	GSM6799835				9313	E3	DGR	HIP	DG	GSM5865947			5556	C4	CA1R	HIP	DG	GSM6557032
	9140	D4	MTG	TC	ODC_0	GSM6800205				9314	E3	DGR	HIP	DG	GSM5865948			5602	C4	CA1R	HIP	DG	GSM6557296
	9134	D4	MTG	TC	ODC_0	GSM6799562				9315	E3	DGR	HIP	DG	GSM5865949			5885	C4	CA1R	HIP	DG	GSM6558416
	9131	D4	MTG	TC	ODC_0	GSM6798301				9318	E3	DGR	HIP	DG	GSM5865954			6080	C4	CA1R	HIP	DG	GSM6559203
	9135	D4	MTG	TC	ODC_0	GSM6799633				9319	E3	DGR	HIP	CA	GSM5865955			5864	C4	CA1R	HIP	DG	GSM6558125
	9143	D4	MTG	TC	ODC_0	GSM6800556				9323	E3	DGR	HIP	DG	GSM5865961			6157	C4	CA1R	HIP	CA	GSM6559558
	10188	E2	FI	FC	Lamp5	GSM7211889				9326	E3	DGR	HIP	DG	GSM5865964			5889	C4	CA1R	HIP	CA	GSM6558457
	10186	E2	FI	FC	Lamp5	GSM7211749				9330	E4	MTG	TC	Vip	GSM5160206			5729	C4	CA1R	HIP	CA	GSM6557763
	10200	E2	FI	FC	Lamp5	GSM7213019				9338	E4	MTG	TC	Vip	GSM5160460			5956	C4	CA1R	HIP	CA	GSM6558843
	10189	E2	FI	FC	Lamp5	GSM7211925				9341	E4	MTG	TC	Vip	GSM5160484			5695	C4	CA1R	HIP	CA	GSM6557678
	10196	E2	FI	FC	Lamp5	GSM7212914				9344	E4	MTG	TC	Pvalb	GSM5160507			5964	C4	CA1R	HIP	CA	GSM6558854
	10297	E2	FI	FC	Sncg	GSM7212192				9348	E4	MTG	TC	Lamp5	GSM5160532			6167	C4	CA1R	HIP	CA	GSM6559575
	10305	E2	FI	FC	Sncg	GSM7213052				9349	E4	MTG	TC	Sncg	GSM5160539			6146	C4	CA1R	HIP	CA	GSM6559537
	10291	E2	FI	FC	Sncg	GSM7211899				9351	E4	MTG	TC	Lamp5	GSM5160553			5858	C4	CA1R	HIP	CA	GSM6558111
	10308	E2	FI	FC	Sncg	GSM7213406				9352	E4	MTG	TC	Pvalb	GSM5160556			5778	C4	CA1R	HIP	CA	GSM6557955
	10300	E2	FI	FC	Sncg	GSM7212397				9353	E4	MTG	TC	Sst	GSM5160557			5481	C4	CA1R	HIP	CA	GSM6556801
	10382	E2	FI	FC	Vip	GSM7211635				9364	E4	MTG	TC	Lamp5	GSM5160822			6066	C4	CA1R	HIP	CA	GSM6559176
	10381	E2	FI	FC	Vip	GSM7211537				9367	E4	MTG	TC	Lamp5	GSM5160849			5830	C4	CA1R	HIP	CA	GSM6558058
	10390	E2	FI	FC	Vip	GSM7211736				9372	E4	MTG	TC	Pvalb	GSM5160904			5772	C4	CA1R	HIP	CA	GSM6557933
	10387	E2	FI	FC	Vip	GSM7211674				9376	E4	MTG	TC	Sst	GSM5160982			6154	C4	CA1R	HIP	CA	GSM6559555
	10422	E2	FI	FC	Vip	GSM7212787				9386	E4	MTG	TC	Lamp5	GSM5161077			7612	D3	CBL	cere	CB	GSM6531896
	10368	E2	FI	FC	Sst	GSM7213265				9393	E4	MTG	TC	Sncg	GSM5161144			7594	D3	CBL	cere	CB	GSM6531579
	10334	E2	FI	FC	Sst	GSM7212099				9405	E4	MTG	TC	Pvalb	GSM5161225			7638	D3	CBL	cere	CB	GSM6532222
	10322	E2	FI	FC	Sst	GSM7211763				9409	E4	MTG	TC	Lamp5	GSM5161265			7592	D3	CBL	cere	CB	GSM6531516
	10315	E2	FI	FC	Sst	GSM7211628				9410	E4	MTG	TC	Pvalb	GSM5161266			7615	D3	CBL	cere	CB	GSM6531986
	10374	E2	FI	FC	Sst	GSM7213416				9411	E4	MTG	TC	Sst	GSM5161268			7340	D3	CBL	cere	CB	GSM6530481
	10233	E2	FI	FC	Pvalb	GSM7211839				9414	E4	MTG	TC	Pvalb	GSM5161284			7593	D3	CBL	cere	CB	GSM6531552
	10236	E2	FI	FC	Pvalb	GSM7211881				9415	E4	MTG	TC	Vip	GSM5161293			7356	D3	CBL	cere	CB	GSM6530518
	10230	E2	FI	FC	Pvalb	GSM7211783				9418	E4	MTG	TC	Sncg	GSM5161310			7237	D3	CBL	cere	CB	GSM6530268
	10262	E2	FI	FC	Pvalb	GSM7212903				9420	E4	MTG	TC	Sst	GSM5161314			7544	D3	CBL	cere	CB	GSM6530737
	10267	E2	FI	FC	Pvalb	GSM7213053				9423	E4	MTG	TC	Lamp5	GSM5161338			7588	D3	CBL	cere	CB	GSM6531452
	10638	E2	FI	FC	L4_6	GSM7211987				9439	E4	MTG	TC	Pvalb	GSM5161466			7597	D3	CBL	cere	CB	GSM6531633
	10684	E2	FI	FC	L4_6	GSM7212868				9443	E4	MTG	TC	Pvalb	GSM5161642			7453	D3	CBL	cere	CB	GSM6530634
	10764	E2	FI	FC	L4_6	GSM7212028				9445	E4	MTG	TC	Vip	GSM5161655			7543	D3	CBL	cere	CB	GSM6530736
	10783	E2	FI	FC	L4_6	GSM7213183				9480	E4	MTG	TC	Pvalb	GSM5162132			7333	D3	CBL	cere	CB	GSM6530440
	10729	E2	FI	FC	L4_6	GSM7211988				9500	E4	MTG	TC	Sst	GSM5162421			7278	D3	CBL	cere	CB	GSM6530350
	10749	E2	FI	FC	L4_6	GSM7211534				9502	E4	MTG	TC	Vip	GSM5162428			7390	D3	CBL	cere	CB	GSM6530557
	10664	E2	FI	FC	L4_6	GSM7211756				9503	E4	MTG	TC	Sncg	GSM5162443			7507	D3	CBL	cere	CB	GSM6530698
	10755	E2	FI	FC	L4_6	GSM7211807				9504	E4	MTG	TC	Sst	GSM5162448			7618	D3	CBL	cere	CB	GSM6532032
	10657	E2	FI	FC	L4_6	GSM7211682				9505	E4	MTG	TC	Lamp5	GSM5162450			7468	D3	CBL	cere	CB	GSM6530651
	10792	E2	FI	FC	L4_6	GSM7211715				9509	E4	MTG	TC	Vip	GSM5162473			7106	D3	CBL	cere	CB	GSM6529803
	10634	E2	FI	FC	L4_6	GSM7211734				9516	E4	MTG	TC	Sncg	GSM5162602			7447	D3	CBL	cere	CB	GSM6530625
	10686	E2	FI	FC	L4_6	GSM7212892				9521	E4	MTG	TC	Pvalb	GSM5162768			7306	D3	CBL	cere	CB	GSM6530407
	10630	E2	FI	FC	L4_6	GSM7211538				9527	E4	MTG	TC	Lamp5	GSM5162857			7492	D3	CBL	cere	CB	GSM6530682
	10654	E2	FI	FC	L4_6	GSM7211536				9530	E4	MTG	TC	Sst	GSM5162873			7311	D3	CBL	cere	CB	GSM6530413
	10746	E2	FI	FC	L4_6	GSM7213379				9535	E4	MTG	TC	Sncg	GSM5163001			8064	D4	MD	BS	THM	GSM6546994
	10658	E2	FI	FC	L4_6	GSM7211688				9542	E4	MTG	TC	Vip	GSM5163152			8065	D4	MD	BS	THM	GSM6546998
	10786	E2	FI	FC	L4_6	GSM7213433				9546	E4	MTG	TC	Sst	GSM5163178			7664	D4	MD	BS	THM	GSM6544653
	10605	E2	FI	FC	L4_6	GSM7211924				9548	E4	MTG	TC	Sncg	GSM5163186			7978	D4	MD	BS	THM	GSM6546568
	10767	E2	FI	FC	L4_6	GSM7212107				9549	E4	MTG	TC	Lamp5	GSM5163188			7668	D4	MD	BS	THM	GSM6544676
	10784	E2	FI	FC	L4_6	GSM7213326				9556	E4	MTG	TC	ODC	GSM5160302			7700	D4	MD	BS	THM	GSM6545155
	10602	E2	FI	FC	L4_6	GSM7211798				9557	E4	MTG	TC	ASC	GSM5160476			7669	D4	MD	BS	THM	GSM6544677
	10637	E2	FI	FC	L4_6	GSM7211902				9558	E4	MTG	TC	ODC	GSM5160495			7679	D4	MD	BS	THM	GSM6544813
	10685	E2	FI	FC	L4_6	GSM7212886				9559	E4	MTG	TC	ASC	GSM5160661			7740	D4	MD	BS	THM	GSM6545397
	10758	E2	FI	FC	L4_6	GSM7211890				9561	E4	MTG	TC	ASC	GSM5160818			8088	D4	MD	BS	THM	GSM6547250
	10593	E2	FI	FC	L2/3-IT	GSM7213495				9562	E4	MTG	TC	ASC	GSM5160913			7804	D4	MD	BS	THM	GSM6545739
	10496	E2	FI	FC	L2/3-IT	GSM7211733				9563	E4	MTG	TC	ODC	GSM5161006			7701	D4	MD	BS	THM	GSM6545156
	10546	E2	FI	FC	L2/3-IT	GSM7212471				9564	E4	MTG	TC	ASC	GSM5161085			7917	D4	MD	BS	THM	GSM6546303
	10508	E2	FI	FC	L2/3-IT	GSM7211882				9565	E4	MTG	TC	ODC	GSM5161195			7803	D4	MD	BS	THM	GSM6545738
	10482	E2	FI	FC	L2/3-IT	GSM7211540				9566	E4	MTG	TC	OPC	GSM5161332			7710	D4	MD	BS	THM	GSM6545287
	10545	E2	FI	FC	L2/3-IT	GSM7212455				9568	E4	MTG	TC	ODC	GSM5161408			7976	D4	MD	BS	THM	GSM6546564
	10520	E2	FI	FC	L2/3-IT	GSM7212093				9569	E4	MTG	TC	OPC	GSM5161435			7960	D4	MD	BS	THM	GSM6546508
	10591	E2	FI	FC	L2/3-IT	GSM7213449				9570	E4	MTG	TC	ODC	GSM5161458			7797	D4	MD	BS	THM	GSM6545703
	10522	E2	FI	FC	L2/3-IT	GSM7212111				9575	E4	MTG	TC	OPC	GSM5161844			8046	D4	MD	BS	THM	GSM6546908
	10495	E2	FI	FC	L2/3-IT	GSM7211730				9577	E4	MTG	TC	ASC	GSM5161970			7671	D4	MD	BS	THM	GSM6544693
	10492	E2	FI	FC	L2/3-IT	GSM7211680				9580	E4	MTG	TC	ODC	GSM5162067			7761	D4	MD	BS	THM	GSM6545492
	10494	E2	FI	FC	L2/3-IT	GSM7211702				9581	E4	MTG	TC	ASC	GSM5162457			7807	D4	MD	BS	THM	GSM6545746
	10561	E2	FI	FC	L2/3-IT	GSM7212766				9585	E4	MTG	TC	OPC	GSM5162840			7932	D4	MD	BS	THM	GSM6546402
	10523	E2	FI	FC	L2/3-IT	GSM7212118				9587	E4	MTG	TC	OPC	GSM5162869			7971	D4	MD	BS	THM	GSM6546543
	10583	E2	FI	FC	L2/3-IT	GSM7213365				9588	E4	MTG	TC	OPC	GSM5163126			7705	D4	MD	BS	THM	GSM6545269
	10500	E2	FI	FC	L2/3-IT	GSM7211779				9590	E4	MTG	TC	ASC	GSM5163172			8151	D4	MD	BS	ODC	GSM6546709
	10515	E2	FI	FC	L2/3-IT	GSM7212040				9591	E4	MTG	TC	ODC	GSM5163185			8150	D4	MD	BS	ODC	GSM6546708
	10487	E2	FI	FC	L2/3-IT	GSM7211639				9592	E4	MTG	TC	OPC	GSM5163191			8117	D4	MD	BS	ODC	GSM6544858
	10521	E2	FI	FC	L2/3-IT	GSM7212109				9593	E4	MTG	TC	OPC	GSM5163199			8146	D4	MD	BS	ODC	GSM6546682
	10535	E2	FI	FC	L2/3-IT	GSM7212372				9597	E4	MTG	TC	L4_6	GSM5160187			8126	D4	MD	BS	ODC	GSM6545391
	10595	E2	FI	FC	L2/3-IT	GSM7213501				9599	E4	MTG	TC	L4_6	GSM5160199			8121	D4	MD	BS	ODC	GSM6544866
	10584	E2	FI	FC	L2/3-IT	GSM7213382				9600	E4	MTG	TC	L4_6	GSM5160202			8120	D4	MD	BS	ASC	GSM6544865
	10544	E2	FI	FC	L2/3-IT	GSM7212450				9603	E4	MTG	TC	L2/3-IT	GSM5160222			8148	D4	MD	BS	ASC	GSM6546701
	10484	E2	FI	FC	L2/3-IT	GSM7211547				9612	E4	MTG	TC	L4_6	GSM5160447			8129	D4	MD	BS	ASC	GSM6545592
	10444	E2	FI	FC	ASC	GSM7213159				9614	E4	MTG	TC	L2/3-IT	GSM5160452			8118	D4	MD	BS	ODC	GSM6544859
	10447	E2	FI	FC	ASC	GSM7213424				9618	E4	MTG	TC	L4_6	GSM5160463			8139	D4	MD	BS	ODC	GSM6545971
	10439	E2	FI	FC	ASC	GSM7211549				9621	E4	MTG	TC	L4_6	GSM5160483			8153	D4	MD	BS	ASC	GSM6546728
	10440	E2	FI	FC	ASC	GSM7211932				9629	E4	MTG	TC	L4_6	GSM5160503			8136	D4	MD	BS	ASC	GSM6545963
	10441	E2	FI	FC	ASC	GSM7212044				9631	E4	MTG	TC	L4_6	GSM5160508			7730	D4	MD	BS	Lamp5	GSM6545353
	10476	E2	FI	FC	OPC	GSM7212694				9632	E4	MTG	TC	L4_6	GSM5160509			7912	D4	MD	BS	Lamp5	GSM6546281
	10477	E2	FI	FC	OPC	GSM7212768				9637	E4	MTG	TC	L4_6	GSM5160524			8057	D4	MD	BS	Lamp5	GSM6546958
	10473	E2	FI	FC	OPC	GSM7211827				9644	E4	MTG	TC	L2/3-IT	GSM5160561			7913	D4	MD	BS	Lamp5	GSM6546282
	10475	E2	FI	FC	OPC	GSM7212620				9646	E4	MTG	TC	L4_6	GSM5160565			7987	D4	MD	BS	Lamp5	GSM6546617
	10451	E2	FI	FC	ODC	GSM7211700				9648	E4	MTG	TC	L4_6	GSM5160567			7689	D4	MD	BS	Lamp5	GSM6545049
	10454	E2	FI	FC	ODC	GSM7211791				9649	E4	MTG	TC	L2/3-IT	GSM5160568			7847	D4	MD	BS	Lamp5	GSM6545931
	10470	E2	FI	FC	ODC	GSM7213357				9650	E4	MTG	TC	L4_6	GSM5160569			8282	E1	A19	OC	Vip	GSM6332464
	10455	E2	FI	FC	ODC	GSM7211797				9652	E4	MTG	TC	L4_6	GSM5160573			8286	E1	A19	OC	Vip	GSM6332571
	10452	E2	FI	FC	ODC	GSM7211709				9656	E4	MTG	TC	L4_6	GSM5160695			8202	E1	A19	OC	Vip	GSM6330412
	12395	F2	V1C	OC	Vip	GSM7190535				9657	E4	MTG	TC	L2/3-IT	GSM5160696			8208	E1	A19	OC	Sst	GSM6330449
	12383	F2	V1C	OC	Vip	GSM7188830				9660	E4	MTG	TC	L2/3-IT	GSM5160738			8271	E1	A19	OC	Sst	GSM6331831
	12393	F2	V1C	OC	Vip	GSM7190269				9670	E4	MTG	TC	L4_6	GSM5160827			8299	E1	A19	OC	Sst	GSM6333031
	12380	F2	V1C	OC	Sst	GSM7190759				9678	E4	MTG	TC	L2/3-IT	GSM5160893			8278	E1	A19	OC	Sst	GSM6332349
	12355	F2	V1C	OC	Sst	GSM7188910				9680	E4	MTG	TC	L2/3-IT	GSM5160917			8205	E1	A19	OC	Sst	GSM6330423
	12376	F2	V1C	OC	Sst	GSM7190220				9689	E4	MTG	TC	L4_6	GSM5160936			8186	E1	A19	OC	Pvalb	GSM6330267
	12329	F2	V1C	OC	Pvalb	GSM7190237				9690	E4	MTG	TC	L4_6	GSM5160937			8275	E1	A19	OC	Pvalb	GSM6332235
	12342	F2	V1C	OC	Pvalb	GSM7190503				9695	E4	MTG	TC	L4_6	GSM5160948			8183	E1	A19	OC	Pvalb	GSM6330252
	12324	F2	V1C	OC	Pvalb	GSM7189977				9697	E4	MTG	TC	L2/3-IT	GSM5160952			8298	E1	A19	OC	Pvalb	GSM6333028
	12323	F2	V1C	OC	Pvalb	GSM7189895				9702	E4	MTG	TC	L2/3-IT	GSM5161005			8181	E1	A19	OC	Pvalb	GSM6330229
	12330	F2	V1C	OC	Pvalb	GSM7190245				9722	E4	MTG	TC	L4_6	GSM5161128			8315	E1	A19	OC	ODC	GSM6331105
	12732	F2	V1C	OC	L4_6	GSM7190181				9723	E4	MTG	TC	L4_6	GSM5161133			8333	E1	A19	OC	ODC	GSM6331886
	12673	F2	V1C	OC	L4_6	GSM7190090				9725	E4	MTG	TC	L4_6	GSM5161137			8318	E1	A19	OC	ODC	GSM6331273
	12621	F2	V1C	OC	L4_6	GSM7189124				9727	E4	MTG	TC	L2/3-IT	GSM5161145			8325	E1	A19	OC	ODC	GSM6331311
	12659	F2	V1C	OC	L4_6	GSM7188656				9758	E4	MTG	TC	L4_6	GSM5161271			8320	E1	A19	OC	ODC	GSM6331281
	12672	F2	V1C	OC	L4_6	GSM7189960				9771	E4	MTG	TC	L2/3-IT	GSM5161315			8185	E1	A19	OC	Lamp5	GSM6330259
	12707	F2	V1C	OC	L4_6	GSM7190230				9772	E4	MTG	TC	L4_6	GSM5161318			8280	E1	A19	OC	Lamp5	GSM6332446
	12692	F2	V1C	OC	L4_6	GSM7190329				9774	E4	MTG	TC	L2/3-IT	GSM5161321			8195	E1	A19	OC	Lamp5	GSM6330345
	12635	F2	V1C	OC	L4_6	GSM7190157				9778	E4	MTG	TC	L4_6	GSM5161329			8193	E1	A19	OC	Lamp5	GSM6330339
	12631	F2	V1C	OC	L4_6	GSM7190141				9779	E4	MTG	TC	L4_6	GSM5161330			8194	E1	A19	OC	Lamp5	GSM6330342
	12655	F2	V1C	OC	L4_6	GSM7189141				9783	E4	MTG	TC	L4_6	GSM5161340			8746	E1	A19	OC	L4_6	GSM6332779
	12639	F2	V1C	OC	L4_6	GSM7190231				9816	E4	MTG	TC	L2/3-IT	GSM5161651			8506	E1	A19	OC	L4_6	GSM6330798
	12694	F2	V1C	OC	L4_6	GSM7190371				9820	E4	MTG	TC	L4_6	GSM5161663			8563	E1	A19	OC	L4_6	GSM6331215
	12645	F2	V1C	OC	L4_6	GSM7190358				9833	E4	MTG	TC	L4_6	GSM5161707			8706	E1	A19	OC	L4_6	GSM6332425
	12713	F2	V1C	OC	L4_6	GSM7190991				9844	E4	MTG	TC	L2/3-IT	GSM5161752			8458	E1	A19	OC	L4_6	GSM6330606
	12471	F2	V1C	OC	L2/3-IT	GSM7189287				9849	E4	MTG	TC	L4_6	GSM5161776			8691	E1	A19	OC	L4_6	GSM6331848
	12431	F2	V1C	OC	L2/3-IT	GSM7188652				9855	E4	MTG	TC	L4_6	GSM5161850			8698	E1	A19	OC	L4_6	GSM6332066
	12459	F2	V1C	OC	L2/3-IT	GSM7189090				9883	E4	MTG	TC	L2/3-IT	GSM5162103			8428	E1	A19	OC	L4_6	GSM6330458
	12485	F2	V1C	OC	L2/3-IT	GSM7189451				9889	E4	MTG	TC	L2/3-IT	GSM5162138			8705	E1	A19	OC	L4_6	GSM6332407
	12567	F2	V1C	OC	L2/3-IT	GSM7190289				9917	E4	MTG	TC	L4_6	GSM5162387			8405	E1	A19	OC	L4_6	GSM6330408
	12575	F2	V1C	OC	L2/3-IT	GSM7190328				9923	E4	MTG	TC	L2/3-IT	GSM5162425			8451	E1	A19	OC	L4_6	GSM6330515
	12556	F2	V1C	OC	L2/3-IT	GSM7190224				9924	E4	MTG	TC	L4_6	GSM5162426			8634	E1	A19	OC	L4_6	GSM6331517
	12570	F2	V1C	OC	L2/3-IT	GSM7190301				9925	E4	MTG	TC	L4_6	GSM5162430			8424	E1	A19	OC	L4_6	GSM6330447
	12579	F2	V1C	OC	L2/3-IT	GSM7190378				9931	E4	MTG	TC	L4_6	GSM5162447			8350	E1	A19	OC	L4_6	GSM6330249
	12482	F2	V1C	OC	L2/3-IT	GSM7189382				9934	E4	MTG	TC	L4_6	GSM5162459			8427	E1	A19	OC	L4_6	GSM6330454
	12538	F2	V1C	OC	L2/3-IT	GSM7190164				9935	E4	MTG	TC	L2/3-IT	GSM5162464			8473	E1	A19	OC	L4_6	GSM6330703
	12416	F2	V1C	OC	ODC	GSM7190113				9938	E4	MTG	TC	L4_6	GSM5162472			8400	E1	A19	OC	L4_6	GSM6330401
	12420	F2	V1C	OC	ODC	GSM7190276				9939	E4	MTG	TC	L2/3-IT	GSM5162474			8387	E1	A19	OC	L4_6	GSM6330377
	13336	F4	CA1R	HIP	CA	GSM5881771				9941	E4	MTG	TC	L2/3-IT	GSM5162478			8700	E1	A19	OC	L4_6	GSM6332113
	13503	F4	CA1R	HIP	CA	GSM5883412				9942	E4	MTG	TC	L4_6	GSM5162483			8438	E1	A19	OC	L4_6	GSM6330485
	13433	F4	CA1R	HIP	CA	GSM5882864				9957	E4	MTG	TC	L2/3-IT	GSM5162617			8403	E1	A19	OC	L4_6	GSM6330405
	13539	F4	CA1R	HIP	CA	GSM5883542				9958	E4	MTG	TC	L4_6	GSM5162618			8689	E1	A19	OC	L4_6	GSM6331832
	13283	F4	CA1R	HIP	CA	GSM5881606				9982	E4	MTG	TC	L2/3-IT	GSM5162870			8380	E1	A19	OC	L4_6	GSM6330362
	13493	F4	CA1R	HIP	DG	GSM5883348				9983	E4	MTG	TC	L2/3-IT	GSM5162874			8402	E1	A19	OC	L4_6	GSM6330404
	13409	F4	CA1R	HIP	DG	GSM5882338				9997	E4	MTG	TC	L2/3-IT	GSM5163135			8410	E1	A19	OC	L4_6	GSM6330416
	13224	F4	CA1R	HIP	DG	GSM5880966				10000	E4	MTG	TC	L4_6	GSM5163148			8343	E1	A19	OC	L2/3-IT	GSM6330224
	13211	F4	CA1R	HIP	DG	GSM5880913				10014	E4	MTG	TC	L4_6	GSM5163193			8539	E1	A19	OC	L2/3-IT	GSM6330959
	13210	F4	CA1R	HIP	DG	GSM5880908				10015	E4	MTG	TC	L2/3-IT	GSM5163194			8555	E1	A19	OC	L2/3-IT	GSM6331086
	13194	F4	CA1R	HIP	DG	GSM5880748				10018	E4	MTG	TC	L4_6	GSM5163204			8561	E1	A19	OC	L2/3-IT	GSM6331184
	13243	F4	CA1R	HIP	DG	GSM5881091				10019	E4	MTG	TC	L2/3-IT	GSM5163205			8344	E1	A19	OC	L2/3-IT	GSM6330225
	13213	F4	CA1R	HIP	DG	GSM5880917				10029	E4	MTG	TC	L4_6	GSM5163232			8482	E1	A19	OC	L2/3-IT	GSM6330715
	13193	F4	CA1R	HIP	DG	GSM5880744				10030	E4	MTG	TC	L4_6	GSM5163235			8421	E1	A19	OC	L2/3-IT	GSM6330440
	13356	F4	CA1R	HIP	DG	GSM5881826				10031	E4	MTG	TC	L2/3-IT	GSM5163240			8450	E1	A19	OC	L2/3-IT	GSM6330512
	13239	F4	CA1R	HIP	DG	GSM5881049				10033	E4	MTG	TC	L2/3-IT	GSM5163245			8413	E1	A19	OC	L2/3-IT	GSM6330424
	13435	F4	CA1R	HIP	DG	GSM5882894				10039	E4	MTG	TC	L4_6	GSM5163256			8361	E1	A19	OC	L2/3-IT	GSM6330287
	14904	H1	Pro	OC	Lamp5	GSM5442733				10040	E4	MTG	TC	L2/3-IT	GSM5163257			8604	E1	A19	OC	L2/3-IT	GSM6331443
	15325	H1	Pro	OC	Lamp5	GSM5444108				10087	F1	PN	BS	PN	GSM6022595			8346	E1	A19	OC	L2/3-IT	GSM6330232
	14854	H1	Pro	OC	Lamp5	GSM5442571				10135	F1	PN	BS	PN	GSM6022794			8443	E1	A19	OC	L2/3-IT	GSM6330492
	14446	H1	Pro	OC	Lamp5	GSM5441327				10201	F1	PN	BS	PN	GSM6022942			8570	E1	A19	OC	L2/3-IT	GSM6331313
	15328	H1	Pro	OC	Lamp5	GSM5444123				10216	F1	PN	BS	PN	GSM6022975			8429	E1	A19	OC	L2/3-IT	GSM6330461
	14967	H1	Pro	OC	Sncg	GSM5442968				10277	F1	PN	BS	PN	GSM6023289			8753	E1	A19	OC	L2/3-IT	GSM6332947
	14969	H1	Pro	OC	Sncg	GSM5442972				10295	F1	PN	BS	PN	GSM6023650			8434	E1	A19	OC	L2/3-IT	GSM6330477
	14574	H1	Pro	OC	Sncg	GSM5441691				10306	F1	PN	BS	PN	GSM6023910			8398	E1	A19	OC	L2/3-IT	GSM6330396
	15313	H1	Pro	OC	Sncg	GSM5444072				10318	F1	PN	BS	PN	GSM6023994			8708	E1	A19	OC	L2/3-IT	GSM6332465
	14462	H1	Pro	OC	Sncg	GSM5441362				10323	F1	PN	BS	PN	GSM6024013			10596	F2	ITG	TC	Vip	GSM6356490
	14633	H1	Pro	OC	Vip	GSM5441853				10335	F1	PN	BS	PN	GSM6024160			10730	F2	ITG	TC	Vip	GSM6358840
	14845	H1	Pro	OC	Vip	GSM5442521				10380	F1	PN	BS	PN	GSM6024429			10586	F2	ITG	TC	Vip	GSM6356444
	15052	H1	Pro	OC	Vip	GSM5443146				10388	F1	PN	BS	PN	GSM6024490			10594	F2	ITG	TC	Vip	GSM6356470
	15084	H1	Pro	OC	Vip	GSM5443194				10511	F1	PN	BS	PN	GSM6025086			10688	F2	ITG	TC	Vip	GSM6358146
	14762	H1	Pro	OC	Vip	GSM5442325				10557	F1	PN	BS	PN	GSM6025259			10657	F2	ITG	TC	Vip	GSM6357780
	15021	H1	Pro	OC	Vip	GSM5443103				10582	F1	PN	BS	ODC	GSM6023116			10690	F2	ITG	TC	Sst	GSM6358218
	15102	H1	Pro	OC	Vip	GSM5443228				10602	F1	PN	BS	ODC	GSM6024582			10667	F2	ITG	TC	Sst	GSM6357826
	15013	H1	Pro	OC	Sst	GSM5443087				11858	F4	CA1R	HIP	CA	GSM5867136			10665	F2	ITG	TC	Sst	GSM6357810
	14476	H1	Pro	OC	Sst	GSM5441395				11865	F4	CA1R	HIP	CA	GSM5867456			10682	F2	ITG	TC	Sst	GSM6357938
	15359	H1	Pro	OC	Sst	GSM5444184				11879	F4	CA1R	HIP	CA	GSM5867487			10676	F2	ITG	TC	Sst	GSM6357879
	15145	H1	Pro	OC	Sst	GSM5443343				11885	F4	CA1R	HIP	CA	GSM5867511			10711	F2	ITG	TC	Sst	GSM6358721
	14505	H1	Pro	OC	Sst	GSM5441503				11887	F4	CA1R	HIP	CA	GSM5867518			10579	F2	ITG	TC	Sncg	GSM6356128
	15320	H1	Pro	OC	Sst	GSM5444091				11905	F4	CA1R	HIP	CA	GSM5867559			10726	F2	ITG	TC	Sncg	GSM6358831
	15298	H1	Pro	OC	Sst	GSM5443946				11910	F4	CA1R	HIP	CA	GSM5867575			10742	F2	ITG	TC	Sncg	GSM6358875
	14657	H1	Pro	OC	Pvalb	GSM5441962				11911	F4	CA1R	HIP	CA	GSM5867576			10767	F2	ITG	TC	ODC	GSM6358284
	15036	H1	Pro	OC	Pvalb	GSM5443126				11916	F4	CA1R	HIP	DG	GSM5867587			10779	F2	ITG	TC	ODC	GSM6358722
	14634	H1	Pro	OC	Pvalb	GSM5441856				11933	F4	CA1R	HIP	DG	GSM5867659			10766	F2	ITG	TC	ODC	GSM6358264
	15066	H1	Pro	OC	Pvalb	GSM5443164				11958	F4	CA1R	HIP	DG	GSM5867736			10782	F2	ITG	TC	ASC	GSM6359005
	14804	H1	Pro	OC	Pvalb	GSM5442430				11979	F4	CA1R	HIP	DG	GSM5867811			10790	F2	ITG	TC	ODC	GSM6359030
	15148	H1	Pro	OC	Pvalb	GSM5443353				12003	F4	CA1R	HIP	CA	GSM5867900			10794	F2	ITG	TC	ODC	GSM6359045
	14991	H1	Pro	OC	L4_6	GSM5443028				12015	F4	CA1R	HIP	CA	GSM5867939			10591	F2	ITG	TC	Lamp5	GSM6356461
	14866	H1	Pro	OC	L4_6	GSM5442588				12017	F4	CA1R	HIP	CA	GSM5867954			10745	F2	ITG	TC	Lamp5	GSM6358892
	15153	H1	Pro	OC	L4_6	GSM5443372				12018	F4	CA1R	HIP	CA	GSM5867956			10754	F2	ITG	TC	Lamp5	GSM6359021
	15288	H1	Pro	OC	L4_6	GSM5443886				12057	F4	CA1R	HIP	DG	GSM5868214			10587	F2	ITG	TC	Lamp5	GSM6356449
	15353	H1	Pro	OC	L4_6	GSM5444173				12071	F4	CA1R	HIP	CA	GSM5868270			10746	F2	ITG	TC	Lamp5	GSM6358894
	15026	H1	Pro	OC	L4_6	GSM5443109				12086	F4	CA1R	HIP	CA	GSM5868449			11043	F2	ITG	TC	L4_6	GSM6358868
	15081	H1	Pro	OC	L4_6	GSM5443189				12102	F4	CA1R	HIP	CA	GSM5869446			10992	F2	ITG	TC	L4_6	GSM6358719
	15228	H1	Pro	OC	L4_6	GSM5443730				12106	F4	CA1R	HIP	DG	GSM5869494			10800	F2	ITG	TC	L4_6	GSM6356259
	15338	H1	Pro	OC	L4_6	GSM5444140				12115	F4	CA1R	HIP	CA	GSM5869580			10881	F2	ITG	TC	L4_6	GSM6356782
	15037	H1	Pro	OC	L4_6	GSM5443127				12143	F4	CA1R	HIP	CA	GSM5869762			10936	F2	ITG	TC	L4_6	GSM6357947
	15345	H1	Pro	OC	L4_6	GSM5444157				12151	F4	CA1R	HIP	CA	GSM5869803			10920	F2	ITG	TC	L4_6	GSM6357819
	15077	H1	Pro	OC	L4_6	GSM5443181				12162	F4	CA1R	HIP	CA	GSM5869856			10919	F2	ITG	TC	L4_6	GSM6357818
	14624	H1	Pro	OC	L4_6	GSM5441833				12165	F4	CA1R	HIP	CA	GSM5869915			11023	F2	ITG	TC	L4_6	GSM6358806
	14993	H1	Pro	OC	L4_6	GSM5443032				12166	G1	V1C	OC	Pvalb	GSM6746183			11058	F2	ITG	TC	L4_6	GSM6358910
	15225	H1	Pro	OC	L4_6	GSM5443724				12168	G1	V1C	OC	Sst	GSM6746259			10937	F2	ITG	TC	L4_6	GSM6357950
	14923	H1	Pro	OC	L4_6	GSM5442781				12172	G1	V1C	OC	Sncg	GSM6746512			10899	F2	ITG	TC	L4_6	GSM6357713
	15214	H1	Pro	OC	L4_6	GSM5443677				12176	G1	V1C	OC	Lamp5	GSM6746609			11062	F2	ITG	TC	L4_6	GSM6358921
	14475	H1	Pro	OC	L4_6	GSM5441392				12177	G1	V1C	OC	Lamp5	GSM6746616			10869	F2	ITG	TC	L4_6	GSM6356696
	15224	H1	Pro	OC	L4_6	GSM5443723				12178	G1	V1C	OC	Lamp5	GSM6746619			10847	F2	ITG	TC	L4_6	GSM6356586
	14729	H1	Pro	OC	L4_6	GSM5442254				12179	G1	V1C	OC	Sncg	GSM6746623			10984	F2	ITG	TC	L4_6	GSM6358701
	15318	H1	Pro	OC	L4_6	GSM5444083				12183	G1	V1C	OC	Sst	GSM6746690			11004	F2	ITG	TC	L4_6	GSM6358740
	15046	H1	Pro	OC	L4_6	GSM5443138				12184	G1	V1C	OC	Pvalb	GSM6746693			10825	F2	ITG	TC	L4_6	GSM6356496
	14949	H1	Pro	OC	L4_6	GSM5442939				12190	G1	V1C	OC	Sncg	GSM6746718			10995	F2	ITG	TC	L4_6	GSM6358725
	15096	H1	Pro	OC	L4_6	GSM5443218				12195	G1	V1C	OC	Lamp5	GSM6746749			11054	F2	ITG	TC	L4_6	GSM6358900
	14724	H1	Pro	OC	L4_6	GSM5442245				12199	G1	V1C	OC	Sncg	GSM6746828			10894	F2	ITG	TC	L2/3-IT	GSM6357680
	15161	H1	Pro	OC	L4_6	GSM5443405				12205	G1	V1C	OC	Pvalb	GSM6746976			10890	F2	ITG	TC	L2/3-IT	GSM6357355
	15044	H1	Pro	OC	L4_6	GSM5443136				12207	G1	V1C	OC	Lamp5	GSM6746992			10979	F2	ITG	TC	L2/3-IT	GSM6358651
	14461	H1	Pro	OC	L2/3-IT	GSM5441360				12208	G1	V1C	OC	Sst	GSM6747065			10819	F2	ITG	TC	L2/3-IT	GSM6356465
	15300	H1	Pro	OC	L2/3-IT	GSM5443948				12215	G1	V1C	OC	Lamp5	GSM6747116			10799	F2	ITG	TC	L2/3-IT	GSM6356237
	15231	H1	Pro	OC	L2/3-IT	GSM5443733				12221	G1	V1C	OC	Sncg	GSM6747239			10908	F2	ITG	TC	L2/3-IT	GSM6357757
	14621	H1	Pro	OC	L2/3-IT	GSM5441828				12227	G1	V1C	OC	Lamp5	GSM6747469			10818	F2	ITG	TC	L2/3-IT	GSM6356463
	14950	H1	Pro	OC	L2/3-IT	GSM5442940				12229	G1	V1C	OC	Pvalb	GSM6747490			11066	F2	ITG	TC	L2/3-IT	GSM6359001
	15033	H1	Pro	OC	L2/3-IT	GSM5443123				12236	G1	V1C	OC	Pvalb	GSM6747586			11040	F2	ITG	TC	L2/3-IT	GSM6358865
	14937	H1	Pro	OC	L2/3-IT	GSM5442916				12238	G1	V1C	OC	Pvalb	GSM6747594			11049	F2	ITG	TC	L2/3-IT	GSM6358883
	14966	H1	Pro	OC	L2/3-IT	GSM5442967				12245	G1	V1C	OC	Lamp5	GSM6747674			10857	F2	ITG	TC	L2/3-IT	GSM6356609
	15022	H1	Pro	OC	L2/3-IT	GSM5443104				12250	G1	V1C	OC	Lamp5	GSM6747728			10913	F2	ITG	TC	L2/3-IT	GSM6357779
	14941	H1	Pro	OC	L2/3-IT	GSM5442924				12252	G1	V1C	OC	Pvalb	GSM6747747			10814	F2	ITG	TC	L2/3-IT	GSM6356448
	14984	H1	Pro	OC	L2/3-IT	GSM5443011				12253	G1	V1C	OC	Pvalb	GSM6747755			10935	F2	ITG	TC	L2/3-IT	GSM6357946
	15276	H1	Pro	OC	L2/3-IT	GSM5443858				12259	G1	V1C	OC	Lamp5	GSM6747891			10918	F2	ITG	TC	L2/3-IT	GSM6357815
	14488	H1	Pro	OC	L2/3-IT	GSM5441449				12263	G1	V1C	OC	Lamp5	GSM6747929			11038	F2	ITG	TC	L2/3-IT	GSM6358861
	14623	H1	Pro	OC	L2/3-IT	GSM5441832				12268	G1	V1C	OC	Pvalb	GSM6747966			11007	F2	ITG	TC	L2/3-IT	GSM6358758
	15089	H1	Pro	OC	L2/3-IT	GSM5443203				12269	G1	V1C	OC	Pvalb	GSM6747969			11064	F2	ITG	TC	L2/3-IT	GSM6358997
	15199	H1	Pro	OC	L2/3-IT	GSM5443658				12276	G1	V1C	OC	Sst	GSM6748091			10999	F2	ITG	TC	L2/3-IT	GSM6358732
	15138	H1	Pro	OC	L2/3-IT	GSM5443324				12278	G1	V1C	OC	Sst	GSM6748096			12834	G4	LEC	TC	Vip	GSM7317858
	14964	H1	Pro	OC	L2/3-IT	GSM5442964				12281	G1	V1C	OC	Pvalb	GSM6748124			12835	G4	LEC	TC	Vip	GSM7317874
	14924	H1	Pro	OC	L2/3-IT	GSM5442807				12283	G1	V1C	OC	Sncg	GSM6748139			12969	G4	LEC	TC	Vip	GSM7318450
	14628	H1	Pro	OC	L2/3-IT	GSM5441841				12288	G1	V1C	OC	Lamp5	GSM6748170			12824	G4	LEC	TC	Vip	GSM7317812
	15056	H1	Pro	OC	L2/3-IT	GSM5443151				12289	G1	V1C	OC	Lamp5	GSM6748174			12919	G4	LEC	TC	Vip	GSM7318217
	15134	H1	Pro	OC	L2/3-IT	GSM5443318				12290	G1	V1C	OC	Sst	GSM6748179			13295	G4	LEC	TC	Vip	GSM7320519
	15279	H1	Pro	OC	L2/3-IT	GSM5443865				12294	G1	V1C	OC	Lamp5	GSM6748210			13027	G4	LEC	TC	Vip	GSM7318768
	15065	H1	Pro	OC	L2/3-IT	GSM5443163				12295	G1	V1C	OC	Sncg	GSM6748211			13315	G4	LEC	TC	Sst	GSM7320688
	14629	H1	Pro	OC	L2/3-IT	GSM5441845				12296	G1	V1C	OC	Sst	GSM6748217			13099	G4	LEC	TC	Sst	GSM7319314
	14477	H1	Pro	OC	L2/3-IT	GSM5441396				12299	G1	V1C	OC	Lamp5	GSM6748233			13033	G4	LEC	TC	Sst	GSM7318797
	14956	H1	Pro	OC	L2/3-IT	GSM5442952				12300	G1	V1C	OC	ODC	GSM6746368			12809	G4	LEC	TC	Sst	GSM7317760
	15049	H1	Pro	OC	L2/3-IT	GSM5443142				12301	G1	V1C	OC	OPC	GSM6746864			13003	G4	LEC	TC	Sst	GSM7318682
	14559	H1	Pro	OC	L2/3-IT	GSM5441655				12303	G1	V1C	OC	ODC	GSM6747701			13162	G4	LEC	TC	Sst	GSM7319717
	15212	H1	Pro	OC	L2/3-IT	GSM5443675				12304	G1	V1C	OC	ODC	GSM6747920			13305	G4	LEC	TC	Sst	GSM7320646
	17551	H4	LEC	TC	Lamp5	GSM7150604				12305	G1	V1C	OC	ODC	GSM6747985			12816	G4	LEC	TC	Sst	GSM7317796
	17545	H4	LEC	TC	Lamp5	GSM7150583				12306	G1	V1C	OC	ODC	GSM6748152			12865	G4	LEC	TC	Sncg	GSM7318004
	16978	H4	LEC	TC	Lamp5	GSM7149469				12307	G1	V1C	OC	ODC	GSM6748215			13353	G4	LEC	TC	Sncg	GSM7320942
	17455	H4	LEC	TC	Lamp5	GSM7150455				12308	G1	V1C	OC	ODC	GSM6748223			12884	G4	LEC	TC	Sncg	GSM7318060
	17316	H4	LEC	TC	Lamp5	GSM7150259				12318	G1	V1C	OC	L4_6	GSM6746334			13287	G4	LEC	TC	Sncg	GSM7320473
	17458	H4	LEC	TC	Vip	GSM7150461				12324	G1	V1C	OC	L4_6	GSM6746356			13068	G4	LEC	TC	Sncg	GSM7319053
	16808	H4	LEC	TC	Vip	GSM7149271				12355	G1	V1C	OC	L4_6	GSM6746600			13040	G4	LEC	TC	Pvalb	GSM7318811
	17229	H4	LEC	TC	Vip	GSM7150140				12357	G1	V1C	OC	L2/3-IT	GSM6746602			13258	G4	LEC	TC	Pvalb	GSM7320248
	16974	H4	LEC	TC	Vip	GSM7149465				12373	G1	V1C	OC	L2/3-IT	GSM6746700			12878	G4	LEC	TC	Pvalb	GSM7318045
	16942	H4	LEC	TC	Vip	GSM7149430				12387	G1	V1C	OC	L4_6	GSM6746733			13154	G4	LEC	TC	Pvalb	GSM7319697
	16741	H4	LEC	TC	Sst	GSM7149188				12395	G1	V1C	OC	L2/3-IT	GSM6746743			13038	G4	LEC	TC	Pvalb	GSM7318805
	17385	H4	LEC	TC	Sst	GSM7150367				12399	G1	V1C	OC	L4_6	GSM6746748			13202	G4	LEC	TC	Pvalb	GSM7319992
	17386	H4	LEC	TC	Sst	GSM7150368				12400	G1	V1C	OC	L4_6	GSM6746757			12918	G4	LEC	TC	Pvalb	GSM7318216
	16772	H4	LEC	TC	Sst	GSM7149223				12402	G1	V1C	OC	L2/3-IT	GSM6746769			12942	G4	LEC	TC	Pvalb	GSM7318307
	17434	H4	LEC	TC	Sst	GSM7150431				12409	G1	V1C	OC	L4_6	GSM6746812			12926	G4	LEC	TC	Pvalb	GSM7318241
	17521	H4	LEC	TC	Pvalb	GSM7150551				12417	G1	V1C	OC	L2/3-IT	GSM6746872			13243	G4	LEC	TC	Pvalb	GSM7320141
	16975	H4	LEC	TC	Pvalb	GSM7149466				12429	G1	V1C	OC	L4_6	GSM6746973			13177	G4	LEC	TC	Pvalb	GSM7319832
	17031	H4	LEC	TC	Pvalb	GSM7149791				12432	G1	V1C	OC	L4_6	GSM6747003			12920	G4	LEC	TC	Pvalb	GSM7318223
	16963	H4	LEC	TC	Pvalb	GSM7149453				12436	G1	V1C	OC	L2/3-IT	GSM6747022			12953	G4	LEC	TC	Lamp5	GSM7318366
	17505	H4	LEC	TC	Pvalb	GSM7150524				12437	G1	V1C	OC	L2/3-IT	GSM6747027			12815	G4	LEC	TC	Lamp5	GSM7317795
	16971	H4	LEC	TC	L4_6	GSM7149462				12438	G1	V1C	OC	L4_6	GSM6747042			13133	G4	LEC	TC	Lamp5	GSM7319602
	16977	H4	LEC	TC	L4_6	GSM7149468				12447	G1	V1C	OC	L4_6	GSM6747102			12858	G4	LEC	TC	Lamp5	GSM7317961
	16948	H4	LEC	TC	L4_6	GSM7149438				12461	G1	V1C	OC	L4_6	GSM6747197			12840	G4	LEC	TC	Lamp5	GSM7317888
	16959	H4	LEC	TC	L4_6	GSM7149449				12478	G1	V1C	OC	L4_6	GSM6747270			13053	G4	LEC	TC	Lamp5	GSM7318969
	17380	H4	LEC	TC	L4_6	GSM7150360				12479	G1	V1C	OC	L4_6	GSM6747327			12822	G4	LEC	TC	Lamp5	GSM7317809
	17429	H4	LEC	TC	L4_6	GSM7150418				12492	G1	V1C	OC	L4_6	GSM6747414			13388	G4	LEC	TC	L4_6	GSM7318828
	16984	H4	LEC	TC	L4_6	GSM7149476				12493	G1	V1C	OC	L4_6	GSM6747416			13387	G4	LEC	TC	L4_6	GSM7318823
	17376	H4	LEC	TC	L4_6	GSM7150354				12496	G1	V1C	OC	L2/3-IT	GSM6747438			13364	G4	LEC	TC	L4_6	GSM7318017
	16951	H4	LEC	TC	L4_6	GSM7149441				12510	G1	V1C	OC	L4_6	GSM6747491			13407	G4	LEC	TC	L4_6	GSM7319715
	17459	H4	LEC	TC	L4_6	GSM7150462				12523	G1	V1C	OC	L4_6	GSM6747529			13368	G4	LEC	TC	L4_6	GSM7318141
	16756	H4	LEC	TC	L4_6	GSM7149204				12550	G1	V1C	OC	L4_6	GSM6747620			13371	G4	LEC	TC	L4_6	GSM7318206
	17441	H4	LEC	TC	L4_6	GSM7150440				12566	G1	V1C	OC	L4_6	GSM6747667			13381	G4	LEC	TC	L4_6	GSM7318692
	17494	H4	LEC	TC	L4_6	GSM7150510				12584	G1	V1C	OC	L4_6	GSM6747733			13372	G4	LEC	TC	L4_6	GSM7318246
	16979	H4	LEC	TC	L4_6	GSM7149470				12586	G1	V1C	OC	L4_6	GSM6747737			13408	G4	LEC	TC	L4_6	GSM7319716
	17404	H4	LEC	TC	L4_6	GSM7150387				12588	G1	V1C	OC	L2/3-IT	GSM6747742			13374	G4	LEC	TC	L4_6	GSM7318256
	17195	H4	LEC	TC	L4_6	GSM7150096				12607	G1	V1C	OC	L2/3-IT	GSM6747834			13393	G4	LEC	TC	L4_6	GSM7319041
	17166	H4	LEC	TC	L4_6	GSM7150062				12623	G1	V1C	OC	L4_6	GSM6747935			13426	G4	LEC	TC	L4_6	GSM7320396
	17446	H4	LEC	TC	L4_6	GSM7150445				12653	G1	V1C	OC	L2/3-IT	GSM6748073			13383	G4	LEC	TC	L4_6	GSM7318743
	17322	H4	LEC	TC	L4_6	GSM7150268				12659	G1	V1C	OC	L4_6	GSM6748080			13355	G4	LEC	TC	L4_6	GSM7317781
	16831	H4	LEC	TC	L4_6	GSM7149296				12660	G1	V1C	OC	L4_6	GSM6748081			13416	G4	LEC	TC	L4_6	GSM7319982
	16708	H4	LEC	TC	L4_6	GSM7148579				12665	G1	V1C	OC	L4_6	GSM6748087			13385	G4	LEC	TC	L4_6	GSM7318807
	17147	H4	LEC	TC	L4_6	GSM7150039				12671	G1	V1C	OC	L2/3-IT	GSM6748098			13430	G4	LEC	TC	L4_6	GSM7320614
	17220	H4	LEC	TC	L4_6	GSM7150127				12672	G1	V1C	OC	L2/3-IT	GSM6748101			13400	G4	LEC	TC	L4_6	GSM7319327
	17051	H4	LEC	TC	L4_6	GSM7149893				12673	G1	V1C	OC	L4_6	GSM6748102			13359	G4	LEC	TC	L4_6	GSM7317909
	17236	H4	LEC	TC	L4_6	GSM7150149				12677	G1	V1C	OC	L4_6	GSM6748107			13389	G4	LEC	TC	L4_6	GSM7318843
	16801	H4	LEC	TC	L2/3-IT	GSM7149261				12680	G1	V1C	OC	L4_6	GSM6748111			13384	G4	LEC	TC	L4_6	GSM7318799
	16964	H4	LEC	TC	L2/3-IT	GSM7149454				12688	G1	V1C	OC	L4_6	GSM6748121			13370	G4	LEC	TC	L4_6	GSM7318194
	16960	H4	LEC	TC	L2/3-IT	GSM7149450				12692	G1	V1C	OC	L4_6	GSM6748128			13365	G4	LEC	TC	L4_6	GSM7318058
	17432	H4	LEC	TC	L2/3-IT	GSM7150429				12695	G1	V1C	OC	L2/3-IT	GSM6748131			13361	G4	LEC	TC	L4_6	GSM7317944
	17405	H4	LEC	TC	L2/3-IT	GSM7150388				12721	G1	V1C	OC	L4_6	GSM6748188			13406	G4	LEC	TC	L4_6	GSM7319690
	16967	H4	LEC	TC	L2/3-IT	GSM7149457				12729	G1	V1C	OC	L4_6	GSM6748214			13419	G4	LEC	TC	L4_6	GSM7320049
	16947	H4	LEC	TC	L2/3-IT	GSM7149437				12733	G1	V1C	OC	L4_6	GSM6748222			13366	G4	LEC	TC	L4_6	GSM7318061
	16965	H4	LEC	TC	L2/3-IT	GSM7149455				12735	G1	V1C	OC	L2/3-IT	GSM6748225			13410	G4	LEC	TC	L4_6	GSM7319848
	16981	H4	LEC	TC	L2/3-IT	GSM7149472				23401	M2	LEC	TC	L2/3-IT	GSM7153263			13421	G4	LEC	TC	L4_6	GSM7320150
	17421	H4	LEC	TC	L2/3-IT	GSM7150407				23403	M2	LEC	TC	L4_6	GSM7153267			13420	G4	LEC	TC	L2/3-IT	GSM7320088
	17410	H4	LEC	TC	L2/3-IT	GSM7150395				23415	M2	LEC	TC	L2/3-IT	GSM7153311			13382	G4	LEC	TC	L2/3-IT	GSM7318723
	17559	H4	LEC	TC	L2/3-IT	GSM7151109				23427	M2	LEC	TC	L4_6	GSM7153360			13377	G4	LEC	TC	L2/3-IT	GSM7318437
	17398	H4	LEC	TC	L2/3-IT	GSM7150381				23434	M2	LEC	TC	Pvalb	GSM7153383			13409	G4	LEC	TC	L2/3-IT	GSM7319806
	16989	H4	LEC	TC	L2/3-IT	GSM7149482				23437	M2	LEC	TC	Pvalb	GSM7153412			13380	G4	LEC	TC	L2/3-IT	GSM7318668
	17445	H4	LEC	TC	L2/3-IT	GSM7150444				23444	M2	LEC	TC	Pvalb	GSM7153491			13428	G4	LEC	TC	L2/3-IT	GSM7320431
	16941	H4	LEC	TC	L2/3-IT	GSM7149429				23446	M2	LEC	TC	L2/3-IT	GSM7153495			13412	G4	LEC	TC	L2/3-IT	GSM7319881
	16778	H4	LEC	TC	L2/3-IT	GSM7149231				23460	M2	LEC	TC	L2/3-IT	GSM7153538			13378	G4	LEC	TC	L2/3-IT	GSM7318569
	17232	H4	LEC	TC	L2/3-IT	GSM7150143				23462	M2	LEC	TC	L2/3-IT	GSM7153681			13423	G4	LEC	TC	L2/3-IT	GSM7320272
	17303	H4	LEC	TC	L2/3-IT	GSM7150240				23473	M2	LEC	TC	Lamp5	GSM7154060			13425	G4	LEC	TC	L2/3-IT	GSM7320344
	17196	H4	LEC	TC	L2/3-IT	GSM7150098				23492	M2	LEC	TC	Vip	GSM7154140			13375	G4	LEC	TC	L2/3-IT	GSM7318272
	17550	H4	LEC	TC	L2/3-IT	GSM7150588				23502	M2	LEC	TC	Pvalb	GSM7154212			13386	G4	LEC	TC	L2/3-IT	GSM7318819
	16909	H4	LEC	TC	L2/3-IT	GSM7149390				23510	M2	LEC	TC	L2/3-IT	GSM7154341			13354	G4	LEC	TC	L2/3-IT	GSM7317776
	17283	H4	LEC	TC	L2/3-IT	GSM7150212				23516	M2	LEC	TC	L4_6	GSM7154362			13436	G4	LEC	TC	L2/3-IT	GSM7320765
	16889	H4	LEC	TC	L2/3-IT	GSM7149366				23532	M2	LEC	TC	L2/3-IT	GSM7154454			13396	G4	LEC	TC	L2/3-IT	GSM7319179
	17161	H4	LEC	TC	L2/3-IT	GSM7150056				23533	M2	LEC	TC	L2/3-IT	GSM7154455			13369	G4	LEC	TC	L2/3-IT	GSM7318176
										23535	M2	LEC	TC	L2/3-IT	GSM7154457			13390	G4	LEC	TC	L2/3-IT	GSM7318937
										23536	M2	LEC	TC	L4_6	GSM7154458			13399	G4	LEC	TC	L2/3-IT	GSM7319274
										23537	M2	LEC	TC	Lamp5	GSM7154460			13398	G4	LEC	TC	L2/3-IT	GSM7319191
										23540	M2	LEC	TC	L4_6	GSM7154463			13360	G4	LEC	TC	L2/3-IT	GSM7317925
										23541	M2	LEC	TC	L2/3-IT	GSM7154464			13434	G4	LEC	TC	L2/3-IT	GSM7320692
										23543	M2	LEC	TC	L4_6	GSM7154468			13391	G4	LEC	TC	L2/3-IT	GSM7318968
										23547	M2	LEC	TC	Sst	GSM7154476			13373	G4	LEC	TC	L2/3-IT	GSM7318252
										23552	M2	LEC	TC	L4_6	GSM7154484			13376	G4	LEC	TC	L2/3-IT	GSM7318405
										23553	M2	LEC	TC	L2/3-IT	GSM7154485			13431	G4	LEC	TC	L2/3-IT	GSM7320622
										23555	M2	LEC	TC	Sncg	GSM7154488			13394	G4	LEC	TC	L2/3-IT	GSM7319048
										23556	M2	LEC	TC	L2/3-IT	GSM7154489			13392	G4	LEC	TC	L2/3-IT	GSM7319016
										23560	M2	LEC	TC	L4_6	GSM7154495			13357	G4	LEC	TC	L2/3-IT	GSM7317827
										23564	M2	LEC	TC	L2/3-IT	GSM7154499			13395	G4	LEC	TC	L2/3-IT	GSM7319152
										23568	M2	LEC	TC	Lamp5	GSM7154503			13437	G4	LEC	TC	L2/3-IT	GSM7320906
										23575	M2	LEC	TC	L4_6	GSM7154535			13429	G4	LEC	TC	L2/3-IT	GSM7320527
										23625	M2	LEC	TC	L2/3-IT	GSM7154959			14404	H2	Pro	OC	Vip	GSM6676069
										23663	M2	LEC	TC	Sncg	GSM7155118			14563	H2	Pro	OC	Vip	GSM6677618
										23671	M2	LEC	TC	L4_6	GSM7155134			14462	H2	Pro	OC	Vip	GSM6676461
										23673	M2	LEC	TC	L2/3-IT	GSM7155163			14512	H2	Pro	OC	Vip	GSM6676799
										23676	M2	LEC	TC	L2/3-IT	GSM7155175			14592	H2	Pro	OC	Sst	GSM6677932
										23679	M2	LEC	TC	L2/3-IT	GSM7155183			14584	H2	Pro	OC	Sst	GSM6677840
										23682	M2	LEC	TC	Lamp5	GSM7155188			14485	H2	Pro	OC	Sst	GSM6676591
										23685	M2	LEC	TC	L4_6	GSM7155193			14438	H2	Pro	OC	Sst	GSM6676302
										23686	M2	LEC	TC	L2/3-IT	GSM7155194			14476	H2	Pro	OC	Sst	GSM6676536
										23689	M2	LEC	TC	L4_6	GSM7155202			14479	H2	Pro	OC	Pvalb	GSM6676564
										23695	M2	LEC	TC	L2/3-IT	GSM7155223			14487	H2	Pro	OC	Pvalb	GSM6676599
										23702	M2	LEC	TC	Sst	GSM7155244			14489	H2	Pro	OC	Pvalb	GSM6676610
										23703	M2	LEC	TC	Sst	GSM7155245			14390	H2	Pro	OC	Pvalb	GSM6675988
										23709	M2	LEC	TC	L4_6	GSM7155258			14486	H2	Pro	OC	Pvalb	GSM6676592
										23714	M2	LEC	TC	Vip	GSM7155279			14626	H2	Pro	OC	Lamp5	GSM6678367
										23715	M2	LEC	TC	L2/3-IT	GSM7155280			14616	H2	Pro	OC	Lamp5	GSM6678298
										23734	M2	LEC	TC	L2/3-IT	GSM7155464			14562	H2	Pro	OC	Lamp5	GSM6677600
										23760	M2	LEC	TC	Vip	GSM7155649			14453	H2	Pro	OC	Lamp5	GSM6676410
										23761	M2	LEC	TC	Pvalb	GSM7155653			14491	H2	Pro	OC	Lamp5	GSM6676631
										23762	M2	LEC	TC	Lamp5	GSM7155655			15560	H2	Pro	OC	L4_6	GSM6678520
										23768	M2	LEC	TC	Vip	GSM7155673			15327	H2	Pro	OC	L4_6	GSM6677820
										23777	M2	LEC	TC	L2/3-IT	GSM7155691			14705	H2	Pro	OC	L4_6	GSM6676001
										23794	M2	LEC	TC	Vip	GSM7155803			15134	H2	Pro	OC	L4_6	GSM6676873
										23812	M2	LEC	TC	L4_6	GSM7155914			14850	H2	Pro	OC	L4_6	GSM6676318
										23818	M2	LEC	TC	L2/3-IT	GSM7155930			14830	H2	Pro	OC	L4_6	GSM6676243
										23825	M2	LEC	TC	L2/3-IT	GSM7155961			15292	H2	Pro	OC	L4_6	GSM6677670
																		14686	H2	Pro	OC	L4_6	GSM6675963
																		15125	H2	Pro	OC	L4_6	GSM6676854
																		15350	H2	Pro	OC	L4_6	GSM6677905
																		14810	H2	Pro	OC	L4_6	GSM6676199
																		15603	H2	Pro	OC	L4_6	GSM6678862
																		14889	H2	Pro	OC	L4_6	GSM6676388
																		15252	H2	Pro	OC	L4_6	GSM6677499
																		15310	H2	Pro	OC	L4_6	GSM6677784
																		14711	H2	Pro	OC	L4_6	GSM6676010
																		14733	H2	Pro	OC	L4_6	GSM6676049
																		14703	H2	Pro	OC	L4_6	GSM6675997
																		14732	H2	Pro	OC	L4_6	GSM6676048
																		15029	H2	Pro	OC	L4_6	GSM6676649
																		14985	H2	Pro	OC	L4_6	GSM6676550
																		14986	H2	Pro	OC	L4_6	GSM6676551
																		15487	H2	Pro	OC	L4_6	GSM6678339
																		15488	H2	Pro	OC	L4_6	GSM6678340
																		14990	H2	Pro	OC	L4_6	GSM6676558
																		14680	H2	Pro	OC	L2/3-IT	GSM6675950
																		14909	H2	Pro	OC	L2/3-IT	GSM6676427
																		14974	H2	Pro	OC	L2/3-IT	GSM6676535
																		14911	H2	Pro	OC	L2/3-IT	GSM6676429
																		14771	H2	Pro	OC	L2/3-IT	GSM6676118
																		15554	H2	Pro	OC	L2/3-IT	GSM6678482
																		14842	H2	Pro	OC	L2/3-IT	GSM6676305
																		14987	H2	Pro	OC	L2/3-IT	GSM6676553
																		15449	H2	Pro	OC	L2/3-IT	GSM6678270
																		14764	H2	Pro	OC	L2/3-IT	GSM6676108
																		14701	H2	Pro	OC	L2/3-IT	GSM6675994
																		15555	H2	Pro	OC	L2/3-IT	GSM6678483
																		15309	H2	Pro	OC	L2/3-IT	GSM6677782
																		14707	H2	Pro	OC	L2/3-IT	GSM6676004

## Sheet: for cortex_inhibitory neurons
	H01_ID	array	Region	cortex	MT	H01				H02_ID	array	Region	cortex	MT	H02				H04_ID	array	Region	cortex	MT	H04
	25916	L1	LEC	TC	Lamp5	GSM6810679				18382	J1	MEC	TC	Sncg	GSM6229086				1014	A3	FI	FC	Pvalb	GSM6369831
	17551	H4	LEC	TC	Lamp5	GSM7150604				19437	J3	A24	FC	Sst	GSM6874763				20811	J2	A24	FC	Pvalb	GSM6362389
	17545	H4	LEC	TC	Lamp5	GSM7150583				134	A1	A5-A7	PC	Sst	GSM5422382				20889	J2	A24	FC	Sst	GSM6363789
	26328	L1	LEC	TC	Lamp5	GSM6811159				6419	D2	A46	FC	Sst	GSM6796133				15947	H4	A46	FC	Pvalb	GSM7326550
	16553	H3	A24	FC	Lamp5	GSM6870166				6410	D2	A46	FC	Sst	GSM6795877				21129	J3	A25	FC	Sncg	GSM6342905
	26364	L1	LEC	TC	Lamp5	GSM6811199				19682	K1	M1C	FC	Pvalb	GSM6771890				1155	A3	FI	FC	Sst	GSM6371849
	26352	L1	LEC	TC	Lamp5	GSM6811185				9349	E4	MTG	TC	Sncg	GSM5160539				18847	J1	V1C	OC	Sst	GSM6708018
	26621	L1	LEC	TC	Lamp5	GSM6811476				20540	K1	M1C	FC	Pvalb	GSM6773081				1678	A4	A46	FC	Sst	GSM6375862
	26491	L1	LEC	TC	Lamp5	GSM6811336				12208	G1	V1C	OC	Sst	GSM6747065				970	A3	FI	FC	Vip	GSM6369332
	26351	L1	LEC	TC	Lamp5	GSM6811184				21794	L2	A1C	TC	Sst	GSM7291861				1611	A4	A46	FC	Sst	GSM6374721
	26456	L1	LEC	TC	Lamp5	GSM6811298				15156	I1	LEC	TC	Pvalb	GSM6785101				18367	I3	MTG	TC	Vip	GSM7344951
	26557	L1	LEC	TC	Lamp5	GSM6811405				20664	K1	M1C	FC	Pvalb	GSM6773252				1681	A4	A46	FC	Sncg	GSM6375878
	26528	L1	LEC	TC	Lamp5	GSM6811374				20756	K1	M1C	FC	Pvalb	GSM6773378				21378	J3	A25	FC	Pvalb	GSM6344432
	26501	L1	LEC	TC	Lamp5	GSM6811346				19648	K1	M1C	FC	Vip	GSM6771846				16021	H4	A46	FC	Lamp5	GSM7327217
	26389	L1	LEC	TC	Lamp5	GSM6811225				20006	K1	M1C	FC	Pvalb	GSM6772324				20722	J2	A24	FC	Sst	GSM6361163
	26322	L1	LEC	TC	Lamp5	GSM6811152				19846	K1	M1C	FC	Pvalb	GSM6772110				483	A2	A5-A7	PC	Pvalb	GSM6351663
	26579	L1	LEC	TC	Lamp5	GSM6811428				21332	L1	M1C	FC	Pvalb	GSM6779498				15945	H4	A46	FC	Sst	GSM7326538
	26545	L1	LEC	TC	Lamp5	GSM6811392				19740	K1	M1C	FC	Sst	GSM6771965				18267	I3	MTG	TC	Pvalb	GSM7343741
	26804	L1	LEC	TC	Lamp5	GSM6811685				19751	K1	M1C	FC	Pvalb	GSM6771980				12865	G4	LEC	TC	Sncg	GSM7318004
	26503	L1	LEC	TC	Lamp5	GSM6811348				20494	K1	M1C	FC	Lamp5	GSM6773028				8186	E1	A19	OC	Pvalb	GSM6330267
	26769	L1	LEC	TC	Lamp5	GSM6811642				19926	K1	M1C	FC	Sst	GSM6772208				13353	G4	LEC	TC	Sncg	GSM7320942
	26871	L1	LEC	TC	Lamp5	GSM6811758				20564	K1	M1C	FC	Pvalb	GSM6773118				15640	H3	A24	FC	Lamp5	GSM7338594
	26638	L1	LEC	TC	Lamp5	GSM6811495				21321	L1	M1C	FC	Sst	GSM6779453				4679	C3	V1C	OC	Lamp5	GSM6842525
	26471	L1	LEC	TC	Lamp5	GSM6811314				20032	K1	M1C	FC	Pvalb	GSM6772352				12884	G4	LEC	TC	Sncg	GSM7318060
	24014	K1	FI	FC	Lamp5	GSM6838578				20035	K1	M1C	FC	Lamp5	GSM6772355				15853	H4	A46	FC	Pvalb	GSM7326022
	26794	L1	LEC	TC	Lamp5	GSM6811672				16316	I1	LEC	TC	Pvalb	GSM6786921				20740	J2	A24	FC	Vip	GSM6361661
	24047	K1	FI	FC	Lamp5	GSM6838612				20625	K1	M1C	FC	Vip	GSM6773203				13040	G4	LEC	TC	Pvalb	GSM7318811
	26405	L1	LEC	TC	Lamp5	GSM6811241				20798	K1	M1C	FC	Pvalb	GSM6773438				12668	G3	V2	OC	Pvalb	GSM6325632
	25642	L1	LEC	TC	Lamp5	GSM6810366				21253	K1	M1C	FC	Pvalb	GSM6774102				20874	J2	A24	FC	Pvalb	GSM6363538
	26886	L1	LEC	TC	Lamp5	GSM6811775				19469	J3	A24	FC	Sst	GSM6875353				19002	J1	V1C	OC	Vip	GSM6709612
	26385	L1	LEC	TC	Lamp5	GSM6811221				19595	K1	M1C	FC	Pvalb	GSM6771781				4623	C3	V1C	OC	Lamp5	GSM6841959
	16978	H4	LEC	TC	Lamp5	GSM7149469				20301	K1	M1C	FC	Pvalb	GSM6772745				4696	C3	V1C	OC	Sst	GSM6842718
	25842	L1	LEC	TC	Lamp5	GSM6810588				19460	J3	A24	FC	Lamp5	GSM6875189				1597	A4	A46	FC	Vip	GSM6374681
	8108	D3	A46	FC	Lamp5	GSM6790079				20685	K1	M1C	FC	Pvalb	GSM6773284				18334	I3	MTG	TC	Sst	GSM7344600
	26597	L1	LEC	TC	Lamp5	GSM6811447				20300	K1	M1C	FC	Pvalb	GSM6772731				12953	G4	LEC	TC	Lamp5	GSM7318366
	27523	L1	LEC	TC	Lamp5	GSM6812498				19857	K1	M1C	FC	Pvalb	GSM6772123				4667	C3	V1C	OC	Sst	GSM6842431
	25804	L1	LEC	TC	Lamp5	GSM6810546				12213	G1	V1C	OC	Vip	GSM6747103				11436	G1	S1C	PC	Vip	GSM6308053
	26550	L1	LEC	TC	Lamp5	GSM6811398				496	A2	ITG	TC	Sst	GSM6167648				1036	A3	FI	FC	Lamp5	GSM6370089
	26636	L1	LEC	TC	Lamp5	GSM6811492				20329	K1	M1C	FC	Vip	GSM6772789				20729	J2	A24	FC	Pvalb	GSM6361319
	26979	L1	LEC	TC	Lamp5	GSM6811882				14146	H2	S1C	PC	Lamp5	GSM5459984				12834	G4	LEC	TC	Vip	GSM7317858
	27276	L1	LEC	TC	Lamp5	GSM6812209				19605	K1	M1C	FC	Vip	GSM6771792				12835	G4	LEC	TC	Vip	GSM7317874
	26896	L1	LEC	TC	Lamp5	GSM6811785				19678	K1	M1C	FC	Lamp5	GSM6771884				13690	H1	MEC	TC	Vip	GSM6367830
	26985	L1	LEC	TC	Lamp5	GSM6811889				19953	K1	M1C	FC	Sst	GSM6772239				4680	C3	V1C	OC	Sst	GSM6842532
	25920	L1	LEC	TC	Lamp5	GSM6810684				139	A1	A5-A7	PC	Lamp5	GSM5422397				4678	C3	V1C	OC	Pvalb	GSM6842509
	26703	L1	LEC	TC	Lamp5	GSM6811566				21005	K1	M1C	FC	Sst	GSM6773733				15613	H3	A24	FC	Sst	GSM7337638
	27104	L1	LEC	TC	Lamp5	GSM6812018				19776	K1	M1C	FC	Pvalb	GSM6772015				16900	I1	A1C	TC	Pvalb	GSM6311795
	25828	L1	LEC	TC	Lamp5	GSM6810571				21322	L1	M1C	FC	Pvalb	GSM6779454				4699	C3	V1C	OC	Vip	GSM6842818
	27531	L1	LEC	TC	Lamp5	GSM6812508				12168	G1	V1C	OC	Sst	GSM6746259				15925	H4	A46	FC	Sst	GSM7326443
	26424	L1	LEC	TC	Lamp5	GSM6811263				133	A1	A5-A7	PC	Lamp5	GSM5422381				15836	H4	A46	FC	Vip	GSM7325927
	27151	L1	LEC	TC	Lamp5	GSM6812072				136	A1	A5-A7	PC	Pvalb	GSM5422386				14626	H2	Pro	OC	Lamp5	GSM6678367
	4005	C1	A5	PC	Lamp5	GSM5408237				19616	K1	M1C	FC	Sst	GSM6771805				16156	H4	A46	FC	Pvalb	GSM7327993
	27167	L1	LEC	TC	Lamp5	GSM6812089				119	A1	A5-A7	PC	Lamp5	GSM5422293				20829	J2	A24	FC	Vip	GSM6362520
	26608	L1	LEC	TC	Lamp5	GSM6811460				19746	K1	M1C	FC	Pvalb	GSM6771975				13693	H1	MEC	TC	Vip	GSM6367837
	26632	L1	LEC	TC	Lamp5	GSM6811487				21104	K1	M1C	FC	Sst	GSM6773868				13315	G4	LEC	TC	Sst	GSM7320688
	25849	L1	LEC	TC	Lamp5	GSM6810597				20708	K1	M1C	FC	Vip	GSM6773324				4620	C3	V1C	OC	Pvalb	GSM6841921
	24084	K1	FI	FC	Lamp5	GSM6838649				132	A1	A5-A7	PC	Lamp5	GSM5422362				15681	H3	A24	FC	Vip	GSM7340200
	27609	L1	LEC	TC	Lamp5	GSM6812593				21540	L1	M1C	FC	Vip	GSM6780328				4799	C3	V1C	OC	Sncg	GSM6844320
	26133	L1	LEC	TC	Lamp5	GSM6810924				20712	K1	M1C	FC	Pvalb	GSM6773328				4674	C3	V1C	OC	Sncg	GSM6842485
	27170	L1	LEC	TC	Lamp5	GSM6812092				12218	G1	V1C	OC	Vip	GSM6747183				18248	I3	MTG	TC	Lamp5	GSM7343541
	27272	L1	LEC	TC	Lamp5	GSM6812203				19518	J3	A24	FC	Pvalb	GSM6876288				1580	A4	A46	FC	Vip	GSM6374632
	27017	L1	LEC	TC	Lamp5	GSM6811921				19411	J3	A24	FC	Vip	GSM6874442				4672	C3	V1C	OC	Lamp5	GSM6842462
	26460	L1	LEC	TC	Lamp5	GSM6811302				23768	M2	LEC	TC	Vip	GSM7155673				4719	C3	V1C	OC	Pvalb	GSM6843116
	24293	K1	FI	FC	Lamp5	GSM6838873				9443	E4	MTG	TC	Pvalb	GSM5161642				4668	C3	V1C	OC	Vip	GSM6842439
	24028	K1	FI	FC	Lamp5	GSM6838592				20872	K1	M1C	FC	Sst	GSM6773542				18359	I3	MTG	TC	Vip	GSM7344891
	25585	L1	LEC	TC	Lamp5	GSM6810306				23794	M2	LEC	TC	Vip	GSM7155803				4643	C3	V1C	OC	Sst	GSM6842062
	24145	K1	FI	FC	Lamp5	GSM6838714				124	A1	A5-A7	PC	Pvalb	GSM5422328				1097	A3	FI	FC	Sncg	GSM6370498
	8087	D3	A46	FC	Lamp5	GSM6789219				19973	K1	M1C	FC	Sst	GSM6772274				4727	C3	V1C	OC	Sncg	GSM6843219
	27008	L1	LEC	TC	Lamp5	GSM6811912				19983	K1	M1C	FC	Lamp5	GSM6772289				15641	H3	A24	FC	Pvalb	GSM7338596
	23450	K1	FI	FC	Lamp5	GSM6837965				20630	K1	M1C	FC	Sst	GSM6773208				15643	H3	A24	FC	Vip	GSM7338742
	26607	L1	LEC	TC	Lamp5	GSM6811459				125	A1	A5-A7	PC	Pvalb	GSM5422333				1700	A4	A46	FC	Pvalb	GSM6376255
	23753	K1	FI	FC	Lamp5	GSM6838297				21015	K1	M1C	FC	Lamp5	GSM6773747				4654	C3	V1C	OC	Pvalb	GSM6842150
	26517	L1	LEC	TC	Lamp5	GSM6811363				20856	K1	M1C	FC	Pvalb	GSM6773522				4621	C3	V1C	OC	Pvalb	GSM6841953
	26420	L1	LEC	TC	Lamp5	GSM6811258				23444	M2	LEC	TC	Pvalb	GSM7153491				4691	C3	V1C	OC	Vip	GSM6842681
	23579	K1	FI	FC	Lamp5	GSM6838106				20288	K1	M1C	FC	Pvalb	GSM6772683				12815	G4	LEC	TC	Lamp5	GSM7317795
	25379	L1	LEC	TC	Lamp5	GSM6810079				40	A1	A5-A7	PC	Pvalb	GSM5421925				4671	C3	V1C	OC	Sncg	GSM6842455
	24152	K1	FI	FC	Lamp5	GSM6838722				21542	L1	M1C	FC	Pvalb	GSM6780332				18307	I3	MTG	TC	Pvalb	GSM7344280
	26810	L1	LEC	TC	Lamp5	GSM6811691				19509	J3	A24	FC	Pvalb	GSM6875999				18328	I3	MTG	TC	Sncg	GSM7344551
	26248	L1	LEC	TC	Lamp5	GSM6811063				19685	K1	M1C	FC	Sst	GSM6771894				4639	C3	V1C	OC	Sst	GSM6842039
	27178	L1	LEC	TC	Lamp5	GSM6812100				21318	L1	M1C	FC	Lamp5	GSM6779440				12969	G4	LEC	TC	Vip	GSM7318450
	16313	H3	A24	FC	Lamp5	GSM6869186				12205	G1	V1C	OC	Pvalb	GSM6746976				4683	C3	V1C	OC	Sncg	GSM6842541
	8124	D3	A46	FC	Lamp5	GSM6790214				20217	K1	M1C	FC	Pvalb	GSM6772590				16899	I1	A1C	TC	Sst	GSM6311762
	26551	L1	LEC	TC	Lamp5	GSM6811399				20645	K1	M1C	FC	Sst	GSM6773229				4720	C3	V1C	OC	Sst	GSM6843126
	27115	L1	LEC	TC	Lamp5	GSM6812030				14979	I1	LEC	TC	Sncg	GSM6784861				4693	C3	V1C	OC	Sst	GSM6842691
	17455	H4	LEC	TC	Lamp5	GSM7150455				21291	L1	M1C	FC	Lamp5	GSM6779354				12824	G4	LEC	TC	Vip	GSM7317812
	24085	K1	FI	FC	Lamp5	GSM6838650				21539	L1	M1C	FC	Vip	GSM6780327				15619	H3	A24	FC	Vip	GSM7337851
	24857	K1	FI	FC	Lamp5	GSM6839473				20985	K1	M1C	FC	Sst	GSM6773705				8208	E1	A19	OC	Sst	GSM6330449
	27614	L1	LEC	TC	Lamp5	GSM6812598				11711	F4	CA1R-CA2R-CA3R	HIP	Sst	GSM5867893				4697	C3	V1C	OC	Lamp5	GSM6842733
	23580	K1	FI	FC	Lamp5	GSM6838107				19933	K1	M1C	FC	Pvalb	GSM6772215				4713	C3	V1C	OC	Lamp5	GSM6843101
	24173	K1	FI	FC	Lamp5	GSM6838745				20610	K1	M1C	FC	Vip	GSM6773181				4636	C3	V1C	OC	Lamp5	GSM6842025
	25221	K1	FI	FC	Lamp5	GSM6839871				19465	J3	A24	FC	Vip	GSM6875293				20892	J2	A24	FC	Sst	GSM6363828
	25815	L1	LEC	TC	Lamp5	GSM6810558				21262	K1	M1C	FC	Vip	GSM6774115				4666	C3	V1C	OC	Sst	GSM6842418
	23443	K1	FI	FC	Lamp5	GSM6837957				6416	D2	A46	FC	Pvalb	GSM6796017				4676	C3	V1C	OC	Sst	GSM6842487
	26258	L1	LEC	TC	Lamp5	GSM6811074				58	A1	A5-A7	PC	Sst	GSM5422071				12919	G4	LEC	TC	Vip	GSM7318217
	26908	L1	LEC	TC	Lamp5	GSM6811798				19800	K1	M1C	FC	Pvalb	GSM6772049				15777	H4	A46	FC	Lamp5	GSM7325581
	26951	L1	LEC	TC	Lamp5	GSM6811849				108	A1	A5-A7	PC	Pvalb	GSM5422271				4703	C3	V1C	OC	Lamp5	GSM6842875
	27191	L1	LEC	TC	Lamp5	GSM6812114				74	A1	A5-A7	PC	Pvalb	GSM5422116				15935	H4	A46	FC	Pvalb	GSM7326494
	26973	L1	LEC	TC	Lamp5	GSM6811876				20422	K1	M1C	FC	Vip	GSM6772938				20743	J2	A24	FC	Sncg	GSM6361731
	8114	D3	A46	FC	Lamp5	GSM6789999				109	A1	A5-A7	PC	Sst	GSM5422272				15682	H3	A24	FC	Pvalb	GSM7340212
	8086	D3	A46	FC	Lamp5	GSM6789040				21695	L1	M1C	FC	Vip	GSM6780975				4802	C3	V1C	OC	Sncg	GSM6844368
	26410	L1	LEC	TC	Lamp5	GSM6811246				20122	K1	M1C	FC	Sst	GSM6772473				967	A3	FI	FC	Sncg	GSM6369291
	26906	L1	LEC	TC	Lamp5	GSM6811795				19930	K1	M1C	FC	Pvalb	GSM6772212				20839	J2	A24	FC	Sncg	GSM6363065
	27642	L1	LEC	TC	Lamp5	GSM6812628				21772	L1	M1C	FC	Vip	GSM6781367				21127	J3	A25	FC	Sst	GSM6342896
	26842	L1	LEC	TC	Lamp5	GSM6811727				518	A2	ITG	TC	Vip	GSM6167852				13133	G4	LEC	TC	Lamp5	GSM7319602
	26683	L1	LEC	TC	Lamp5	GSM6811545				21251	K1	M1C	FC	Sst	GSM6774098				4763	C3	V1C	OC	Lamp5	GSM6843961
	26972	L1	LEC	TC	Lamp5	GSM6811875				140	A1	A5-A7	PC	Vip	GSM5422401				16056	H4	A46	FC	Sst	GSM7327391
	24285	K1	FI	FC	Lamp5	GSM6838865				20500	K1	M1C	FC	Lamp5	GSM6773035				4768	C3	V1C	OC	Lamp5	GSM6844015
	24062	K1	FI	FC	Lamp5	GSM6838627				21255	K1	M1C	FC	Pvalb	GSM6774106				4714	C3	V1C	OC	Vip	GSM6843104
	26617	L1	LEC	TC	Lamp5	GSM6811472				21770	L1	M1C	FC	Lamp5	GSM6781365				1648	A4	A46	FC	Sst	GSM6375254
	14904	H1	Pro	OC	Lamp5	GSM5442733				9502	E4	MTG	TC	Vip	GSM5162428				4650	C3	V1C	OC	Sst	GSM6842106
	27132	L1	LEC	TC	Lamp5	GSM6812050				20175	K1	M1C	FC	Lamp5	GSM6772532				4808	C3	V1C	OC	Pvalb	GSM6844997
	24372	K1	FI	FC	Lamp5	GSM6838955				19902	K1	M1C	FC	Vip	GSM6772178				15964	H4	A46	FC	Pvalb	GSM7326652
	26666	L1	LEC	TC	Lamp5	GSM6811528				41	A1	A5-A7	PC	Sst	GSM5421926				18342	I3	MTG	TC	Lamp5	GSM7344656
	25477	L1	LEC	TC	Lamp5	GSM6810187				21012	K1	M1C	FC	Pvalb	GSM6773744				13258	G4	LEC	TC	Pvalb	GSM7320248
	23215	K1	FI	FC	Lamp5	GSM6837704				19486	J3	A24	FC	Sst	GSM6875621				1697	A4	A46	FC	Lamp5	GSM6376213
	25682	L1	LEC	TC	Lamp5	GSM6810408				20425	K1	M1C	FC	Pvalb	GSM6772941				12655	G3	V2	OC	Pvalb	GSM6324186
	25747	L1	LEC	TC	Lamp5	GSM6810483				21736	L1	M1C	FC	Sncg	GSM6781155				4669	C3	V1C	OC	Pvalb	GSM6842445
	24122	K1	FI	FC	Lamp5	GSM6838690				21457	L1	M1C	FC	Vip	GSM6780000				15626	H3	A24	FC	Vip	GSM7338223
	24725	K1	FI	FC	Lamp5	GSM6839336				118	A1	A5-A7	PC	Vip	GSM5422292				4655	C3	V1C	OC	Lamp5	GSM6842154
	25371	L1	LEC	TC	Lamp5	GSM6810071				20484	K1	M1C	FC	Sncg	GSM6773016				16143	H4	A46	FC	Pvalb	GSM7327902
	26944	L1	LEC	TC	Lamp5	GSM6811840				19828	K1	M1C	FC	Sst	GSM6772091				4776	C3	V1C	OC	Sst	GSM6844167
	26992	L1	LEC	TC	Lamp5	GSM6811896				19975	K1	M1C	FC	Sst	GSM6772277				4645	C3	V1C	OC	Lamp5	GSM6842066
	27166	L1	LEC	TC	Lamp5	GSM6812088				15628	I1	LEC	TC	Pvalb	GSM6785995				16066	H4	A46	FC	Pvalb	GSM7327424
	25572	L1	LEC	TC	Lamp5	GSM6810291				20181	K1	M1C	FC	Pvalb	GSM6772541				4681	C3	V1C	OC	Vip	GSM6842537
	23531	K1	FI	FC	Lamp5	GSM6838052				12296	G1	V1C	OC	Sst	GSM6748217				4689	C3	V1C	OC	Sst	GSM6842674
	25297	K1	FI	FC	Lamp5	GSM6839952				19993	K1	M1C	FC	Lamp5	GSM6772307				4743	C3	V1C	OC	Pvalb	GSM6843528
	24221	K1	FI	FC	Lamp5	GSM6838794				57	A1	A5-A7	PC	Lamp5	GSM5422051				15951	H4	A46	FC	Vip	GSM7326585
	26997	L1	LEC	TC	Lamp5	GSM6811901				121	A1	A5-A7	PC	Sncg	GSM5422302				1649	A4	A46	FC	Sst	GSM6375260
	8094	D3	A46	FC	Lamp5	GSM6790129				97	A1	A5-A7	PC	Vip	GSM5422198				4694	C3	V1C	OC	Pvalb	GSM6842700
	23568	K1	FI	FC	Lamp5	GSM6838092				113	A1	A5-A7	PC	Lamp5	GSM5422280				4742	C3	V1C	OC	Sst	GSM6843516
	26625	L1	LEC	TC	Lamp5	GSM6811480				20242	K1	M1C	FC	Sst	GSM6772618				4785	C3	V1C	OC	Lamp5	GSM6844230
	8110	D3	A46	FC	Lamp5	GSM6791506				12209	G1	V1C	OC	Vip	GSM6747066				12348	G2	M1C	FC	Sst	GSM6315624
	25986	L1	LEC	TC	Lamp5	GSM6810757				21509	L1	M1C	FC	Sst	GSM6780194				18347	I3	MTG	TC	Sst	GSM7344759
	26229	L1	LEC	TC	Lamp5	GSM6811041				21538	L1	M1C	FC	Pvalb	GSM6780324				4646	C3	V1C	OC	Vip	GSM6842071
	24134	K1	FI	FC	Lamp5	GSM6838703				21510	L1	M1C	FC	Pvalb	GSM6780196				4783	C3	V1C	OC	Sst	GSM6844207
	27302	L1	LEC	TC	Lamp5	GSM6812239				19381	J3	A24	FC	Sncg	GSM6873921				13295	G4	LEC	TC	Vip	GSM7320519
	24655	K1	FI	FC	Lamp5	GSM6839265				21702	L1	M1C	FC	Vip	GSM6780997				493	A2	A5-A7	PC	Vip	GSM6351719
	8897	D4	MTG	TC	Lamp5	GSM6799788				35	A1	A5-A7	PC	Pvalb	GSM5421888				4619	C3	V1C	OC	Vip	GSM6841895
	27258	L1	LEC	TC	Lamp5	GSM6812188				21711	L1	M1C	FC	Sst	GSM6781026				16057	H4	A46	FC	Vip	GSM7327395
	25199	K1	FI	FC	Lamp5	GSM6839847				21373	L1	M1C	FC	Pvalb	GSM6779664				4660	C3	V1C	OC	Pvalb	GSM6842234
	27237	L1	LEC	TC	Lamp5	GSM6812164				128	A1	A5-A7	PC	Pvalb	GSM5422342				4682	C3	V1C	OC	Lamp5	GSM6842540
	27529	L1	LEC	TC	Lamp5	GSM6812506				53	A1	A5-A7	PC	Vip	GSM5422033				18237	I3	MTG	TC	Lamp5	GSM7343465
	26310	L1	LEC	TC	Lamp5	GSM6811140				21294	L1	M1C	FC	Sst	GSM6779360				18360	I3	MTG	TC	Vip	GSM7344915
	24230	K1	FI	FC	Lamp5	GSM6838803				12278	G1	V1C	OC	Sst	GSM6748096				15984	H4	A46	FC	Vip	GSM7326810
	25194	K1	FI	FC	Lamp5	GSM6839842				21755	L1	M1C	FC	Lamp5	GSM6781303				4649	C3	V1C	OC	Pvalb	GSM6842099
	25520	L1	LEC	TC	Lamp5	GSM6810232				16231	I1	LEC	TC	Sst	GSM6786808				18218	I3	MTG	TC	Vip	GSM7343279
	27582	L1	LEC	TC	Lamp5	GSM6812561				21710	L1	M1C	FC	Sst	GSM6781021				15828	H4	A46	FC	Sst	GSM7325891
	8088	D3	A46	FC	Lamp5	GSM6789247				94	A1	A5-A7	PC	Pvalb	GSM5422174				4717	C3	V1C	OC	Lamp5	GSM6843108
	24962	K1	FI	FC	Lamp5	GSM6839596				21771	L1	M1C	FC	Sst	GSM6781366				4653	C3	V1C	OC	Sst	GSM6842148
	27933	L1	LEC	TC	Lamp5	GSM6812960				20509	K1	M1C	FC	Pvalb	GSM6773046				18352	I3	MTG	TC	Sst	GSM7344809
	26670	L1	LEC	TC	Lamp5	GSM6811532				9352	E4	MTG	TC	Pvalb	GSM5160556				4777	C3	V1C	OC	Lamp5	GSM6844176
	24789	K1	FI	FC	Lamp5	GSM6839403				20994	K1	M1C	FC	Sst	GSM6773716				1699	A4	A46	FC	Sncg	GSM6376254
	8904	D4	MTG	TC	Lamp5	GSM6798876				19471	J3	A24	FC	Vip	GSM6875384				1142	A3	FI	FC	Pvalb	GSM6371429
	27060	L1	LEC	TC	Lamp5	GSM6811968				21449	L1	M1C	FC	Vip	GSM6779982				13027	G4	LEC	TC	Vip	GSM7318768
	24210	K1	FI	FC	Lamp5	GSM6838783				12225	G1	V1C	OC	Vip	GSM6747435				4637	C3	V1C	OC	Sncg	GSM6842027
	8912	D4	MTG	TC	Lamp5	GSM6799668				12238	G1	V1C	OC	Pvalb	GSM6747594				15621	H3	A24	FC	Sncg	GSM7337942
	8115	D3	A46	FC	Lamp5	GSM6790313				87	A1	A5-A7	PC	Pvalb	GSM5422147				4633	C3	V1C	OC	Sncg	GSM6842008
	8107	D3	A46	FC	Lamp5	GSM6789222				9549	E4	MTG	TC	Lamp5	GSM5163188				4733	C3	V1C	OC	Lamp5	GSM6843390
	23534	K1	FI	FC	Lamp5	GSM6838055				16775	I1	LEC	TC	Sncg	GSM6787549				4761	C3	V1C	OC	Pvalb	GSM6843933
	27174	L1	LEC	TC	Lamp5	GSM6812096				19446	J3	A24	FC	Pvalb	GSM6874895				4617	C3	V1C	OC	Vip	GSM6841838
	25750	L1	LEC	TC	Lamp5	GSM6810486				16670	I1	LEC	TC	Lamp5	GSM6787422				4670	C3	V1C	OC	Lamp5	GSM6842453
	8906	D4	MTG	TC	Lamp5	GSM6799798				19837	K1	M1C	FC	Pvalb	GSM6772100				15612	H3	A24	FC	Lamp5	GSM7337623
	23519	K1	FI	FC	Lamp5	GSM6838039				21098	K1	M1C	FC	Pvalb	GSM6773861				4757	C3	V1C	OC	Sst	GSM6843896
	24801	K1	FI	FC	Lamp5	GSM6839415				20209	K1	M1C	FC	Vip	GSM6772580				4795	C3	V1C	OC	Sst	GSM6844278
	8911	D4	MTG	TC	Lamp5	GSM6799058				100	A1	A5-A7	PC	Lamp5	GSM5422231				13287	G4	LEC	TC	Sncg	GSM7320473
	27113	L1	LEC	TC	Lamp5	GSM6812028				21620	L1	M1C	FC	Pvalb	GSM6780620				4673	C3	V1C	OC	Lamp5	GSM6842478
	24720	K1	FI	FC	Lamp5	GSM6839330				20154	K1	M1C	FC	Sncg	GSM6772505				4718	C3	V1C	OC	Sst	GSM6843114
	27130	L1	LEC	TC	Lamp5	GSM6812048				21317	L1	M1C	FC	Vip	GSM6779430				16159	H4	A46	FC	Sst	GSM7328014
	27065	L1	LEC	TC	Lamp5	GSM6811975				6365	D2	A46	FC	Lamp5	GSM6794942				4741	C3	V1C	OC	Sst	GSM6843515
	8092	D3	A46	FC	Lamp5	GSM6789963				16647	I1	LEC	TC	Lamp5	GSM6787399				4644	C3	V1C	OC	Lamp5	GSM6842065
	24186	K1	FI	FC	Lamp5	GSM6838758				9530	E4	MTG	TC	Sst	GSM5162873				4772	C3	V1C	OC	Lamp5	GSM6844072
	23522	K1	FI	FC	Lamp5	GSM6838042				21420	L1	M1C	FC	Vip	GSM6779877				13306	G4	LEC	TC	Vip	GSM7320647
	23996	K1	FI	FC	Lamp5	GSM6838558				21496	L1	M1C	FC	Vip	GSM6780153				4803	C3	V1C	OC	Sncg	GSM6844395
	26249	L1	LEC	TC	Lamp5	GSM6811065				21319	L1	M1C	FC	Sst	GSM6779446				4806	C3	V1C	OC	Sncg	GSM6844934
	26251	L1	LEC	TC	Lamp5	GSM6811067				20266	K1	M1C	FC	Sst	GSM6772657				4781	C3	V1C	OC	Pvalb	GSM6844201
	22917	K1	FI	FC	Lamp5	GSM6837388				72	A1	A5-A7	PC	Sst	GSM5422114				4738	C3	V1C	OC	Sst	GSM6843489
	24694	K1	FI	FC	Lamp5	GSM6839304				21413	L1	M1C	FC	Sst	GSM6779850				4753	C3	V1C	OC	Vip	GSM6843857
	27423	L1	LEC	TC	Lamp5	GSM6812385				11743	F4	CA1R-CA2R-CA3R	HIP	Sst	GSM5868650				4715	C3	V1C	OC	Pvalb	GSM6843105
	25673	L1	LEC	TC	Lamp5	GSM6810398				141	A1	A5-A7	PC	Sst	GSM5422404				18434	I3	MTG	TC	Sst	GSM7345922
	25423	L1	LEC	TC	Lamp5	GSM6810126				62	A1	A5-A7	PC	Vip	GSM5422079				4767	C3	V1C	OC	Sncg	GSM6844014
	26700	L1	LEC	TC	Lamp5	GSM6811563				75	A1	A5-A7	PC	Lamp5	GSM5422117				4701	C3	V1C	OC	Sst	GSM6842857
	24426	K1	FI	FC	Lamp5	GSM6839013				34	A1	A5-A7	PC	Sst	GSM5421885				8271	E1	A19	OC	Sst	GSM6331831
	24065	K1	FI	FC	Lamp5	GSM6838630				20811	K1	M1C	FC	Sst	GSM6773458				1520	A4	A46	FC	Pvalb	GSM6374335
	24095	K1	FI	FC	Lamp5	GSM6838662				92	A1	A5-A7	PC	Pvalb	GSM5422162				18412	I3	MTG	TC	Lamp5	GSM7345635
	4021	C1	A5	PC	Lamp5	GSM5409895				21381	L1	M1C	FC	Pvalb	GSM6779685				4779	C3	V1C	OC	Pvalb	GSM6844194
	27858	L1	LEC	TC	Lamp5	GSM6812876				19566	K1	M1C	FC	Pvalb	GSM6771738				4724	C3	V1C	OC	Vip	GSM6843196
	26873	L1	LEC	TC	Lamp5	GSM6811760				20864	K1	M1C	FC	Sst	GSM6773532				4688	C3	V1C	OC	Pvalb	GSM6842650
	8908	D4	MTG	TC	Lamp5	GSM6800919				21451	L1	M1C	FC	Lamp5	GSM6779984				13099	G4	LEC	TC	Sst	GSM7319314
	26073	L1	LEC	TC	Lamp5	GSM6810854				21375	L1	M1C	FC	Pvalb	GSM6779671				4769	C3	V1C	OC	Lamp5	GSM6844026
	8100	D3	A46	FC	Lamp5	GSM6791851				4281	C2	A44-A45	FC	Lamp5	GSM7301140				18300	I3	MTG	TC	Vip	GSM7344160
	27442	L1	LEC	TC	Lamp5	GSM6812406				64	A1	A5-A7	PC	Sst	GSM5422086				15628	H3	A24	FC	Vip	GSM7338266
	25827	L1	LEC	TC	Lamp5	GSM6810570				21748	L1	M1C	FC	Pvalb	GSM6781238				16968	I1	A1C	TC	Sst	GSM6313972
	8106	D3	A46	FC	Lamp5	GSM6788995				65	A1	A5-A7	PC	Pvalb	GSM5422090				13522	H1	MEC	TC	Lamp5	GSM6366903
	8902	D4	MTG	TC	Lamp5	GSM6798342				112	A1	A5-A7	PC	Pvalb	GSM5422279				4648	C3	V1C	OC	Pvalb	GSM6842088
	25444	L1	LEC	TC	Lamp5	GSM6810152				21557	L1	M1C	FC	Sncg	GSM6780389				4686	C3	V1C	OC	Sst	GSM6842630
	8085	D3	A46	FC	Lamp5	GSM6789030				21599	L1	M1C	FC	Vip	GSM6780520				21140	J3	A25	FC	Vip	GSM6342976
	27517	L1	LEC	TC	Lamp5	GSM6812491				11671	F4	CA1R-CA2R-CA3R	HIP	Pvalb	GSM5867574				18852	J1	V1C	OC	Sncg	GSM6708051
	22955	K1	FI	FC	Lamp5	GSM6837427				21737	L1	M1C	FC	Lamp5	GSM6781162				15749	H4	A46	FC	Pvalb	GSM7325404
	26167	L1	LEC	TC	Lamp5	GSM6810964				120	A1	A5-A7	PC	Lamp5	GSM5422298				18221	I3	MTG	TC	Vip	GSM7343295
	27355	L1	LEC	TC	Lamp5	GSM6812296				19981	K1	M1C	FC	Pvalb	GSM6772287				4798	C3	V1C	OC	Lamp5	GSM6844316
	25065	K1	FI	FC	Lamp5	GSM6839704				19433	J3	A24	FC	Pvalb	GSM6874723				1147	A3	FI	FC	Vip	GSM6371516
	8120	D3	A46	FC	Lamp5	GSM6791466				117	A1	A5-A7	PC	Pvalb	GSM5422288				18371	I3	MTG	TC	Vip	GSM7344989
	4000	C1	A5	PC	Lamp5	GSM5407592				21324	L1	M1C	FC	Pvalb	GSM6779456				4749	C3	V1C	OC	Pvalb	GSM6843708
	25858	L1	LEC	TC	Lamp5	GSM6810610				19436	J3	A24	FC	Lamp5	GSM6874759				4631	C3	V1C	OC	Sst	GSM6841996
	8099	D3	A46	FC	Lamp5	GSM6791799				19451	J3	A24	FC	Lamp5	GSM6875080				1506	A4	A46	FC	Sncg	GSM6374195
	8121	D3	A46	FC	Lamp5	GSM6791535				20157	K1	M1C	FC	Pvalb	GSM6772508				4722	C3	V1C	OC	Lamp5	GSM6843170
	26303	L1	LEC	TC	Lamp5	GSM6811129				71	A1	A5-A7	PC	Pvalb	GSM5422113				18317	I3	MTG	TC	Lamp5	GSM7344395
	8113	D3	A46	FC	Lamp5	GSM6789504				16098	I1	LEC	TC	Vip	GSM6786630				4656	C3	V1C	OC	Lamp5	GSM6842179
	25082	K1	FI	FC	Lamp5	GSM6839725				17109	I1	LEC	TC	Lamp5	GSM6787957				1684	A4	A46	FC	Sst	GSM6375902
	8109	D3	A46	FC	Lamp5	GSM6790836				19808	K1	M1C	FC	Pvalb	GSM6772062				16063	H4	A46	FC	Lamp5	GSM7327412
	25165	K1	FI	FC	Lamp5	GSM6839812				21267	K1	M1C	FC	Vip	GSM6774124				4705	C3	V1C	OC	Sst	GSM6842981
	26290	L1	LEC	TC	Lamp5	GSM6811115				16091	I1	LEC	TC	Vip	GSM6786622				4789	C3	V1C	OC	Sncg	GSM6844241
	26207	L1	LEC	TC	Lamp5	GSM6811015				60	A1	A5-A7	PC	Pvalb	GSM5422073				4624	C3	V1C	OC	Vip	GSM6841961
	8899	D4	MTG	TC	Lamp5	GSM6799943				21759	L1	M1C	FC	Vip	GSM6781321				18445	I3	MTG	TC	Vip	GSM7345999
	24268	K1	FI	FC	Lamp5	GSM6838846				9509	E4	MTG	TC	Vip	GSM5162473				4723	C3	V1C	OC	Sst	GSM6843195
	3453	B4	A19	OC	Lamp5	GSM7160524				20148	K1	M1C	FC	Pvalb	GSM6772499				4651	C3	V1C	OC	Pvalb	GSM6842108
	8112	D3	A46	FC	Lamp5	GSM6789446				21768	L1	M1C	FC	Vip	GSM6781362				11513	G1	S1C	PC	Lamp5	GSM6308778
	8102	D3	A46	FC	Lamp5	GSM6790440				19383	J3	A24	FC	Vip	GSM6873928				18216	I3	MTG	TC	Vip	GSM7343271
	24398	K1	FI	FC	Lamp5	GSM6838982				19736	K1	M1C	FC	Sncg	GSM6771960				18416	I3	MTG	TC	Vip	GSM7345678
	24451	K1	FI	FC	Lamp5	GSM6839040				110	A1	A5-A7	PC	Pvalb	GSM5422274				12857	G4	LEC	TC	Vip	GSM7317954
	26011	L1	LEC	TC	Lamp5	GSM6810783				19467	J3	A24	FC	Sst	GSM6875300				15663	H3	A24	FC	Pvalb	GSM7339751
	26305	L1	LEC	TC	Lamp5	GSM6811134				21602	L1	M1C	FC	Sst	GSM6780527				4759	C3	V1C	OC	Sst	GSM6843923
	20571	J1	V1C	OC	Lamp5	GSM6740404				6363	D2	A46	FC	Pvalb	GSM6794935				15910	H4	A46	FC	Lamp5	GSM7326385
	8091	D3	A46	FC	Lamp5	GSM6789859				20929	K1	M1C	FC	Sst	GSM6773621				16929	I1	A1C	TC	Sst	GSM6313195
	24321	K1	FI	FC	Lamp5	GSM6838901				16789	I1	LEC	TC	Pvalb	GSM6787566				4751	C3	V1C	OC	Sst	GSM6843800
	8095	D3	A46	FC	Lamp5	GSM6790160				21365	L1	M1C	FC	Sncg	GSM6779635				12412	G2	M1C	FC	Vip	GSM6317218
	23690	K1	FI	FC	Lamp5	GSM6838228				88	A1	A5-A7	PC	Pvalb	GSM5422150				18296	I3	MTG	TC	Lamp5	GSM7344120
	25761	L1	LEC	TC	Lamp5	GSM6810498				5538	C4	CA1C-CA2C-CA3C-DGC-CA4C	HIP	Lamp5	GSM6004025				4700	C3	V1C	OC	Sncg	GSM6842855
	8916	D4	MTG	TC	Lamp5	GSM6798618				3644	C1	FI	FC	Sncg	GSM7227751				16058	H4	A46	FC	Sst	GSM7327397
	25529	L1	LEC	TC	Lamp5	GSM6810243				21426	L1	M1C	FC	Sst	GSM6779903				4652	C3	V1C	OC	Sst	GSM6842127
	27540	L1	LEC	TC	Lamp5	GSM6812518				6431	D2	A46	FC	Vip	GSM6796250				4762	C3	V1C	OC	Sst	GSM6843958
	26331	L1	LEC	TC	Lamp5	GSM6811163				19487	J3	A24	FC	Pvalb	GSM6875622				4731	C3	V1C	OC	Lamp5	GSM6843365
	24169	K1	FI	FC	Lamp5	GSM6838740				11768	F4	CA1R-CA2R-CA3R	HIP	Vip	GSM5869570				18348	I3	MTG	TC	Sst	GSM7344767
	8084	D3	A46	FC	Lamp5	GSM6788977				43	A1	A5-A7	PC	Vip	GSM5421937				4640	C3	V1C	OC	Lamp5	GSM6842049
	25519	L1	LEC	TC	Lamp5	GSM6810231				21122	K1	M1C	FC	Pvalb	GSM6773895				4695	C3	V1C	OC	Lamp5	GSM6842716
	25907	L1	LEC	TC	Lamp5	GSM6810668				21299	L1	M1C	FC	Vip	GSM6779375				4690	C3	V1C	OC	Sst	GSM6842679
	26213	L1	LEC	TC	Lamp5	GSM6811022				21533	L1	M1C	FC	Lamp5	GSM6780294				4780	C3	V1C	OC	Sst	GSM6844195
	23672	K1	FI	FC	Lamp5	GSM6838209				21692	L1	M1C	FC	Lamp5	GSM6780967				4626	C3	V1C	OC	Lamp5	GSM6841966
	26195	L1	LEC	TC	Lamp5	GSM6811002				16141	I1	LEC	TC	Vip	GSM6786685				13034	G4	LEC	TC	Vip	GSM7318798
	23330	K1	FI	FC	Lamp5	GSM6837833				107	A1	A5-A7	PC	Lamp5	GSM5422265				4745	C3	V1C	OC	Vip	GSM6843531
	27359	L1	LEC	TC	Lamp5	GSM6812301				19429	J3	A24	FC	Vip	GSM6874686				4662	C3	V1C	OC	Sst	GSM6842243
	23938	K1	FI	FC	Lamp5	GSM6838499				9344	E4	MTG	TC	Pvalb	GSM5160507				4730	C3	V1C	OC	Sst	GSM6843364
	26144	L1	LEC	TC	Lamp5	GSM6810936				19842	K1	M1C	FC	Pvalb	GSM6772105				15661	H3	A24	FC	Pvalb	GSM7339703
	8903	D4	MTG	TC	Lamp5	GSM6798839				21034	K1	M1C	FC	Vip	GSM6773766				16053	H4	A46	FC	Lamp5	GSM7327372
	27535	L1	LEC	TC	Lamp5	GSM6812512				20526	K1	M1C	FC	Pvalb	GSM6773065				4755	C3	V1C	OC	Vip	GSM6843888
	24146	K1	FI	FC	Lamp5	GSM6838715				29	A1	A5-A7	PC	Sst	GSM5421832				15804	H4	A46	FC	Lamp5	GSM7325734
	25115	K1	FI	FC	Lamp5	GSM6839760				19490	J3	A24	FC	Sst	GSM6875675				1017	A3	FI	FC	Pvalb	GSM6369903
	23069	K1	FI	FC	Lamp5	GSM6837548				99	A1	A5-A7	PC	Pvalb	GSM5422218				15824	H4	A46	FC	Lamp5	GSM7325880
	20148	J1	V1C	OC	Lamp5	GSM6739934				12279	G1	V1C	OC	Vip	GSM6748117				14592	H2	Pro	OC	Sst	GSM6677932
	26894	L1	LEC	TC	Lamp5	GSM6811783				21699	L1	M1C	FC	Pvalb	GSM6780989				4711	C3	V1C	OC	Lamp5	GSM6843095
	4025	C1	A5	PC	Lamp5	GSM5410157				21530	L1	M1C	FC	Sst	GSM6780278				4677	C3	V1C	OC	Sst	GSM6842508
	8896	D4	MTG	TC	Lamp5	GSM6799771				21458	L1	M1C	FC	Pvalb	GSM6780002				18236	I3	MTG	TC	Sst	GSM7343464
	23397	K1	FI	FC	Lamp5	GSM6837906				16473	I1	LEC	TC	Sst	GSM6787156				13297	G4	LEC	TC	Vip	GSM7320530
	25759	L1	LEC	TC	Lamp5	GSM6810496				16699	I1	LEC	TC	Lamp5	GSM6787455				4726	C3	V1C	OC	Pvalb	GSM6843209
	23767	K1	FI	FC	Lamp5	GSM6838311				19853	K1	M1C	FC	Sst	GSM6772119				4704	C3	V1C	OC	Sst	GSM6842881
	8083	D3	A46	FC	Lamp5	GSM6788947				19752	K1	M1C	FC	Vip	GSM6771981				4716	C3	V1C	OC	Sst	GSM6843107
	25175	K1	FI	FC	Lamp5	GSM6839822				21650	L1	M1C	FC	Vip	GSM6780775				18223	I3	MTG	TC	Sst	GSM7343341
	19702	J1	V1C	OC	Lamp5	GSM6739374				16667	I1	LEC	TC	Vip	GSM6787419				12858	G4	LEC	TC	Lamp5	GSM7317961
	8919	D4	MTG	TC	Lamp5	GSM6799796				138	A1	A5-A7	PC	Sst	GSM5422396				4663	C3	V1C	OC	Vip	GSM6842248
	25349	L1	LEC	TC	Lamp5	GSM6810049				21022	K1	M1C	FC	Sst	GSM6773754				18400	I3	MTG	TC	Pvalb	GSM7345491
	23207	K1	FI	FC	Lamp5	GSM6837696				19742	K1	M1C	FC	Vip	GSM6771967				15618	H3	A24	FC	Pvalb	GSM7337823
	24800	K1	FI	FC	Lamp5	GSM6839414				20139	K1	M1C	FC	Vip	GSM6772490				4791	C3	V1C	OC	Vip	GSM6844249
	23284	K1	FI	FC	Lamp5	GSM6837780				17038	I1	LEC	TC	Pvalb	GSM6787874				4734	C3	V1C	OC	Sst	GSM6843402
	4003	C1	A5	PC	Lamp5	GSM5408214				19786	K1	M1C	FC	Sst	GSM6772029				4665	C3	V1C	OC	Lamp5	GSM6842367
	25121	K1	FI	FC	Lamp5	GSM6839766				12295	G1	V1C	OC	Sncg	GSM6748211				4756	C3	V1C	OC	Sst	GSM6843889
	21858	J1	V1C	OC	Lamp5	GSM6741893				9548	E4	MTG	TC	Sncg	GSM5163186				15959	H4	A46	FC	Pvalb	GSM7326628
	17316	H4	LEC	TC	Lamp5	GSM7150259				13	A1	A5-A7	PC	Sncg	GSM5421703				4629	C3	V1C	OC	Sst	GSM6841977
	26089	L1	LEC	TC	Lamp5	GSM6810870				8	A1	A5-A7	PC	Vip	GSM5421668				4675	C3	V1C	OC	Vip	GSM6842486
	8123	D3	A46	FC	Lamp5	GSM6788973				19693	K1	M1C	FC	Pvalb	GSM6771906				11670	G1	S1C	PC	Vip	GSM6310306
	23225	K1	FI	FC	Lamp5	GSM6837716				16674	I1	LEC	TC	Pvalb	GSM6787427				18294	I3	MTG	TC	Vip	GSM7344059
	25266	K1	FI	FC	Lamp5	GSM6839918				19418	J3	A24	FC	Lamp5	GSM6874543				4782	C3	V1C	OC	Sst	GSM6844206
	8117	D3	A46	FC	Lamp5	GSM6790470				20950	K1	M1C	FC	Sst	GSM6773655				4807	C3	V1C	OC	Pvalb	GSM6844977
	8918	D4	MTG	TC	Lamp5	GSM6799775				19870	K1	M1C	FC	Pvalb	GSM6772139				4615	C3	V1C	OC	Pvalb	GSM6841819
	25154	K1	FI	FC	Lamp5	GSM6839800				21433	L1	M1C	FC	Pvalb	GSM6779928				4801	C3	V1C	OC	Pvalb	GSM6844358
	23716	K1	FI	FC	Lamp5	GSM6838257				21031	K1	M1C	FC	Sst	GSM6773763				15776	H4	A46	FC	Vip	GSM7325575
	24465	K1	FI	FC	Lamp5	GSM6839056				12183	G1	V1C	OC	Sst	GSM6746690				4728	C3	V1C	OC	Pvalb	GSM6843232
	17371	H4	LEC	TC	Lamp5	GSM7150349				96	A1	A5-A7	PC	Sst	GSM5422197				16912	I1	A1C	TC	Sst	GSM6312220
	20729	J1	V1C	OC	Lamp5	GSM6740586				114	A1	A5-A7	PC	Sst	GSM5422281				4794	C3	V1C	OC	Pvalb	GSM6844265
	26148	L1	LEC	TC	Lamp5	GSM6810940				131	A1	A5-A7	PC	Sst	GSM5422360				4805	C3	V1C	OC	Lamp5	GSM6844635
	4040	C1	A5	PC	Lamp5	GSM5410164				9364	E4	MTG	TC	Lamp5	GSM5160822				12840	G4	LEC	TC	Lamp5	GSM7317888
	26035	L1	LEC	TC	Lamp5	GSM6810811				143	A1	A5-A7	PC	Pvalb	GSM5422408				4729	C3	V1C	OC	Sst	GSM6843265
	8118	D3	A46	FC	Lamp5	GSM6790639				144	A1	A5-A7	PC	Pvalb	GSM5422414				18446	I3	MTG	TC	Sncg	GSM7346029
	20294	J1	V1C	OC	Lamp5	GSM6740098				16736	I1	LEC	TC	Lamp5	GSM6787502				15622	H3	A24	FC	Sncg	GSM7337994
	8921	D4	MTG	TC	Lamp5	GSM6799272				16529	I1	LEC	TC	Pvalb	GSM6787239				15833	H4	A46	FC	Lamp5	GSM7325914
	24247	K1	FI	FC	Lamp5	GSM6838821				9415	E4	MTG	TC	Vip	GSM5161293				4793	C3	V1C	OC	Sst	GSM6844263
	19867	J1	V1C	OC	Lamp5	GSM6739616				83	A1	A5-A7	PC	Pvalb	GSM5422138				18370	I3	MTG	TC	Sst	GSM7344982
	4026	C1	A5	PC	Lamp5	GSM5410179				21227	K1	M1C	FC	Sst	GSM6774053				4735	C3	V1C	OC	Pvalb	GSM6843419
	24669	K1	FI	FC	Lamp5	GSM6839279				20903	K1	M1C	FC	Lamp5	GSM6773582				12878	G4	LEC	TC	Pvalb	GSM7318045
	25603	L1	LEC	TC	Lamp5	GSM6810325				20475	K1	M1C	FC	Vip	GSM6773007				4800	C3	V1C	OC	Sst	GSM6844349
	27496	L1	LEC	TC	Lamp5	GSM6812468				21605	L1	M1C	FC	Sst	GSM6780535				4616	C3	V1C	OC	Sst	GSM6841830
	27044	L1	LEC	TC	Lamp5	GSM6811950				19729	K1	M1C	FC	Sst	GSM6771949				18283	I3	MTG	TC	Vip	GSM7343927
	20228	J1	V1C	OC	Lamp5	GSM6740021				137	A1	A5-A7	PC	Sst	GSM5422393				4638	C3	V1C	OC	Pvalb	GSM6842028
	8913	D4	MTG	TC	Lamp5	GSM6799801				12227	G1	V1C	OC	Lamp5	GSM6747469				15651	H3	A24	FC	Lamp5	GSM7339323
	16750	H4	LEC	TC	Lamp5	GSM7149198				6383	D2	A46	FC	Pvalb	GSM6795257				12414	G2	M1C	FC	Sst	GSM6317560
	8098	D3	A46	FC	Lamp5	GSM6791296				95	A1	A5-A7	PC	Pvalb	GSM5422186				18361	I3	MTG	TC	Sst	GSM7344919
	23455	K1	FI	FC	Lamp5	GSM6837970				19663	K1	M1C	FC	Vip	GSM6771862				16939	I1	A1C	TC	Pvalb	GSM6313410
	26211	L1	LEC	TC	Lamp5	GSM6811020				59	A1	A5-A7	PC	Pvalb	GSM5422072				16082	H4	A46	FC	Vip	GSM7327486
	8122	D3	A46	FC	Lamp5	GSM6791903				9439	E4	MTG	TC	Pvalb	GSM5161466				15837	H4	A46	FC	Vip	GSM7325936
	16346	H3	A24	FC	Lamp5	GSM6869277				21705	L1	M1C	FC	Sst	GSM6781005				501	A2	A5-A7	PC	Vip	GSM6351810
	24409	K1	FI	FC	Lamp5	GSM6838996				15047	I1	LEC	TC	Vip	GSM6784964				4797	C3	V1C	OC	Pvalb	GSM6844299
	27914	L1	LEC	TC	Lamp5	GSM6812940				19497	J3	A24	FC	Sncg	GSM6875842				18435	I3	MTG	TC	Vip	GSM7345932
	8907	D4	MTG	TC	Lamp5	GSM6800405				21775	L1	M1C	FC	Pvalb	GSM6781383				4732	C3	V1C	OC	Vip	GSM6843371
	26272	L1	LEC	TC	Lamp5	GSM6811093				21571	L1	M1C	FC	Pvalb	GSM6780444				15736	H4	A46	FC	Vip	GSM7325317
	27901	L1	LEC	TC	Lamp5	GSM6812926				19435	J3	A24	FC	Sst	GSM6874741				21322	J3	A25	FC	Sncg	GSM6343982
	24421	K1	FI	FC	Lamp5	GSM6839008				17028	I1	LEC	TC	Lamp5	GSM6787864				15811	H4	A46	FC	Vip	GSM7325792
	8901	D4	MTG	TC	Lamp5	GSM6800220				6336	D2	A46	FC	Sst	GSM6794386				13053	G4	LEC	TC	Lamp5	GSM7318969
	8116	D3	A46	FC	Lamp5	GSM6790457				19459	J3	A24	FC	Sncg	GSM6875188				20754	J2	A24	FC	Pvalb	GSM6361890
	23718	K1	FI	FC	Lamp5	GSM6838260				21591	L1	M1C	FC	Lamp5	GSM6780499				15669	H3	A24	FC	Vip	GSM7339917
	20179	J1	V1C	OC	Lamp5	GSM6739966				15860	I1	LEC	TC	Lamp5	GSM6786315				4770	C3	V1C	OC	Vip	GSM6844059
	23802	K1	FI	FC	Lamp5	GSM6838349				122	A1	A5-A7	PC	Pvalb	GSM5422304				4758	C3	V1C	OC	Sncg	GSM6843898
	8097	D3	A46	FC	Lamp5	GSM6790858				16925	I1	LEC	TC	Pvalb	GSM6787744				15631	H3	A24	FC	Sst	GSM7338296
	23352	K1	FI	FC	Lamp5	GSM6837858				6316	D2	A46	FC	Pvalb	GSM6794088				18225	I3	MTG	TC	Lamp5	GSM7343370
	8093	D3	A46	FC	Lamp5	GSM6789978				6395	D2	A46	FC	Pvalb	GSM6795504				15620	H3	A24	FC	Vip	GSM7337888
	25432	L1	LEC	TC	Lamp5	GSM6810135				16517	I1	LEC	TC	Sncg	GSM6787227				4625	C3	V1C	OC	Vip	GSM6841963
	24252	K1	FI	FC	Lamp5	GSM6838826				16691	I1	LEC	TC	Pvalb	GSM6787445				18454	I3	MTG	TC	Sst	GSM7346183
	21165	J1	V1C	OC	Lamp5	GSM6741090				19478	J3	A24	FC	Lamp5	GSM6875536				16002	H4	A46	FC	Lamp5	GSM7327020
	8103	D3	A46	FC	Lamp5	GSM6790659				6339	D2	A46	FC	Sncg	GSM6794403				15827	H4	A46	FC	Vip	GSM7325888
	8089	D3	A46	FC	Lamp5	GSM6789260				6284	D2	A46	FC	Vip	GSM6793644				4661	C3	V1C	OC	Sst	GSM6842235
	22315	J1	V1C	OC	Lamp5	GSM6742451				12276	G1	V1C	OC	Sst	GSM6748091				12342	G2	M1C	FC	Vip	GSM6315498
	17267	H4	LEC	TC	Lamp5	GSM7150187				20237	K1	M1C	FC	Pvalb	GSM6772613				4614	C3	V1C	OC	Vip	GSM6841814
	27003	L1	LEC	TC	Lamp5	GSM6811907				6319	D2	A46	FC	Sst	GSM6794122				4634	C3	V1C	OC	Sst	GSM6842017
	25454	L1	LEC	TC	Lamp5	GSM6810164				6430	D2	A46	FC	Vip	GSM6796226				18439	I3	MTG	TC	Sst	GSM7345972
	20373	J1	V1C	OC	Lamp5	GSM6740188				15847	I1	LEC	TC	Lamp5	GSM6786301				4786	C3	V1C	OC	Vip	GSM6844231
	2081	B1	CA1C	HIP	Lamp5	GSM5888337				6436	D2	A46	FC	Sst	GSM6796283				4641	C3	V1C	OC	Sst	GSM6842050
	27463	L1	LEC	TC	Lamp5	GSM6812431				19660	K1	M1C	FC	Pvalb	GSM6771858				16151	H4	A46	FC	Lamp5	GSM7327976
	27672	L1	LEC	TC	Lamp5	GSM6812659				21743	L1	M1C	FC	Sst	GSM6781196				4642	C3	V1C	OC	Sst	GSM6842056
	22940	K1	FI	FC	Lamp5	GSM6837411				21677	L1	M1C	FC	Pvalb	GSM6780912				15840	H4	A46	FC	Sst	GSM7325944
	24325	K1	FI	FC	Lamp5	GSM6838905				6298	D2	A46	FC	Sst	GSM6793768				18331	I3	MTG	TC	Vip	GSM7344584
	26696	L1	LEC	TC	Lamp5	GSM6811559				127	A1	A5-A7	PC	Sst	GSM5422338				4709	C3	V1C	OC	Sncg	GSM6843025
	23187	K1	FI	FC	Lamp5	GSM6837673				6288	D2	A46	FC	Vip	GSM6793687				15742	H4	A46	FC	Sst	GSM7325346
	23334	K1	FI	FC	Lamp5	GSM6837837				21453	L1	M1C	FC	Vip	GSM6779994				13033	G4	LEC	TC	Sst	GSM7318797
	8915	D4	MTG	TC	Lamp5	GSM6798495				10	A1	A5-A7	PC	Pvalb	GSM5421671				18399	I3	MTG	TC	Sncg	GSM7345479
	8910	D4	MTG	TC	Lamp5	GSM6798628				6307	D2	A46	FC	Sncg	GSM6793854				4804	C3	V1C	OC	Vip	GSM6844396
	8090	D3	A46	FC	Lamp5	GSM6789489				6293	D2	A46	FC	Pvalb	GSM6793750				15668	H3	A24	FC	Pvalb	GSM7339883
	24848	K1	FI	FC	Lamp5	GSM6839464				20129	K1	M1C	FC	Pvalb	GSM6772480				4754	C3	V1C	OC	Pvalb	GSM6843877
	27809	L1	LEC	TC	Lamp5	GSM6812823				6439	D2	A46	FC	Sst	GSM6796383				15677	H3	A24	FC	Vip	GSM7340159
	25232	K1	FI	FC	Lamp5	GSM6839882				106	A1	A5-A7	PC	Sst	GSM5422264				18228	I3	MTG	TC	Pvalb	GSM7343401
	27514	L1	LEC	TC	Lamp5	GSM6812488				6404	D2	A46	FC	Vip	GSM6795704				20727	J2	A24	FC	Sst	GSM6361300
	25063	K1	FI	FC	Lamp5	GSM6839702				6354	D2	A46	FC	Pvalb	GSM6794775				1145	A3	FI	FC	Lamp5	GSM6371486
	5067	C2	ITG	TC	Lamp5	GSM6146326				21744	L1	M1C	FC	Sst	GSM6781217				4752	C3	V1C	OC	Lamp5	GSM6843826
	23773	K1	FI	FC	Lamp5	GSM6838318				19832	K1	M1C	FC	Lamp5	GSM6772095				18318	I3	MTG	TC	Pvalb	GSM7344435
	19786	J1	V1C	OC	Lamp5	GSM6739528				19515	J3	A24	FC	Sst	GSM6876187				16963	I1	A1C	TC	Sst	GSM6313895
	25539	L1	LEC	TC	Lamp5	GSM6810255				21503	L1	M1C	FC	Sncg	GSM6780181				4750	C3	V1C	OC	Vip	GSM6843712
	25965	L1	LEC	TC	Lamp5	GSM6810734				21774	L1	M1C	FC	Vip	GSM6781381				4627	C3	V1C	OC	Lamp5	GSM6841974
	21048	J1	V1C	OC	Lamp5	GSM6740957				12264	G1	V1C	OC	Vip	GSM6747932				1024	A3	FI	FC	Vip	GSM6370029
	8111	D3	A46	FC	Lamp5	GSM6789313				20472	K1	M1C	FC	Sst	GSM6773004				2449	B2	A44-A45	FC	Vip	GSM6404646
	8104	D3	A46	FC	Lamp5	GSM6791268				19523	K1	M1C	FC	Pvalb	GSM6771622				12822	G4	LEC	TC	Lamp5	GSM7317809
	19968	J1	V1C	OC	Lamp5	GSM6739729				19826	K1	M1C	FC	Vip	GSM6772089				13172	G4	LEC	TC	Sncg	GSM7319819
	4006	C1	A5	PC	Lamp5	GSM5408241				6348	D2	A46	FC	Pvalb	GSM6794553				13068	G4	LEC	TC	Sncg	GSM7319053
	26045	L1	LEC	TC	Lamp5	GSM6810825				98	A1	A5-A7	PC	Pvalb	GSM5422201				18266	I3	MTG	TC	Lamp5	GSM7343730
	8105	D3	A46	FC	Lamp5	GSM6791274				16922	I1	LEC	TC	Sncg	GSM6787741				15946	H4	A46	FC	Lamp5	GSM7326545
	23121	K1	FI	FC	Lamp5	GSM6837604				6376	D2	A46	FC	Sst	GSM6795222				15667	H3	A24	FC	Lamp5	GSM7339847
	25891	L1	LEC	TC	Lamp5	GSM6810650				16143	I1	LEC	TC	Vip	GSM6786687				10690	F2	ITG	TC	Sst	GSM6358218
	23762	K1	FI	FC	Lamp5	GSM6838306				6296	D2	A46	FC	Sst	GSM6793764				15849	H4	A46	FC	Sncg	GSM7325999
	24997	K1	FI	FC	Lamp5	GSM6839635				6364	D2	A46	FC	Vip	GSM6794940				4760	C3	V1C	OC	Sncg	GSM6843930
	26015	L1	LEC	TC	Lamp5	GSM6810788				93	A1	A5-A7	PC	Sst	GSM5422173				18234	I3	MTG	TC	Sncg	GSM7343456
	20680	J1	V1C	OC	Lamp5	GSM6740528				12184	G1	V1C	OC	Pvalb	GSM6746693				4630	C3	V1C	OC	Sst	GSM6841991
	27308	L1	LEC	TC	Lamp5	GSM6812245				6295	D2	A46	FC	Sst	GSM6793760				4708	C3	V1C	OC	Pvalb	GSM6843002
	2093	B1	CA1C	HIP	Lamp5	GSM5888412				20188	K1	M1C	FC	Sst	GSM6772548				15965	H4	A46	FC	Pvalb	GSM7326657
	26070	L1	LEC	TC	Lamp5	GSM6810851				19844	K1	M1C	FC	Lamp5	GSM6772107				13044	G4	LEC	TC	Vip	GSM7318829
	27058	L1	LEC	TC	Lamp5	GSM6811966				6362	D2	A46	FC	Pvalb	GSM6794923				15764	H4	A46	FC	Sncg	GSM7325488
	8900	D4	MTG	TC	Lamp5	GSM6800179				6418	D2	A46	FC	Pvalb	GSM6796127				1129	A3	FI	FC	Sst	GSM6370953
	26754	L1	LEC	TC	Lamp5	GSM6811623				21418	L1	M1C	FC	Pvalb	GSM6779869				4740	C3	V1C	OC	Sst	GSM6843513
	8894	D4	MTG	TC	Lamp5	GSM6799684				73	A1	A5-A7	PC	Pvalb	GSM5422115				4698	C3	V1C	OC	Pvalb	GSM6842751
	17018	H4	LEC	TC	Lamp5	GSM7149551				12178	G1	V1C	OC	Lamp5	GSM6746619				16191	H4	A46	FC	Vip	GSM7328186
	25873	L1	LEC	TC	Lamp5	GSM6810626				16094	I1	LEC	TC	Lamp5	GSM6786626				12875	G4	LEC	TC	Vip	GSM7318036
	27898	L1	LEC	TC	Lamp5	GSM6812923				24	A1	A5-A7	PC	Sst	GSM5421796				12338	G2	M1C	FC	Lamp5	GSM6315247
	24381	K1	FI	FC	Lamp5	GSM6838964				12281	G1	V1C	OC	Pvalb	GSM6748124				15955	H4	A46	FC	Pvalb	GSM7326598
	8922	D4	MTG	TC	Lamp5	GSM6800019				6327	D2	A46	FC	Pvalb	GSM6794210				15821	H4	A46	FC	Vip	GSM7325860
	8119	D3	A46	FC	Lamp5	GSM6790796				3678	C1	FI	FC	Sst	GSM7228200				4632	C3	V1C	OC	Lamp5	GSM6841998
	27937	L1	LEC	TC	Lamp5	GSM6812966				3635	C1	FI	FC	Lamp5	GSM7227517				18420	I3	MTG	TC	Sst	GSM7345759
	4012	C1	A5	PC	Lamp5	GSM5408974				79	A1	A5-A7	PC	Pvalb	GSM5422126				4664	C3	V1C	OC	Sst	GSM6842345
	25990	L1	LEC	TC	Lamp5	GSM6810762				21378	L1	M1C	FC	Vip	GSM6779675				4647	C3	V1C	OC	Pvalb	GSM6842073
	23842	K1	FI	FC	Lamp5	GSM6838395				6341	D2	A46	FC	Lamp5	GSM6794469				20881	J2	A24	FC	Lamp5	GSM6363618
	26727	L1	LEC	TC	Lamp5	GSM6811590				6455	D2	A46	FC	Pvalb	GSM6796622				15883	H4	A46	FC	Sst	GSM7326199
	23335	K1	FI	FC	Lamp5	GSM6837838				12253	G1	V1C	OC	Pvalb	GSM6747755				4778	C3	V1C	OC	Sst	GSM6844189
	21837	J1	V1C	OC	Lamp5	GSM6741872				19931	K1	M1C	FC	Sst	GSM6772213				18407	I3	MTG	TC	Pvalb	GSM7345572
	19972	J1	V1C	OC	Lamp5	GSM6739735				6342	D2	A46	FC	Pvalb	GSM6794517				4628	C3	V1C	OC	Vip	GSM6841975
	22294	J1	V1C	OC	Lamp5	GSM6742428				6380	D2	A46	FC	Pvalb	GSM6795239				15648	H3	A24	FC	Pvalb	GSM7339171
	8905	D4	MTG	TC	Lamp5	GSM6799313				6408	D2	A46	FC	Sst	GSM6795871				4635	C3	V1C	OC	Pvalb	GSM6842023
	25788	L1	LEC	TC	Lamp5	GSM6810529				12290	G1	V1C	OC	Sst	GSM6748179				15950	H4	A46	FC	Sst	GSM7326580
	8895	D4	MTG	TC	Lamp5	GSM6799766				19389	J3	A24	FC	Lamp5	GSM6874022				523	A2	A5-A7	PC	Vip	GSM6352242
	23713	K1	FI	FC	Lamp5	GSM6838254				16701	I1	LEC	TC	Pvalb	GSM6787457				16077	H4	A46	FC	Vip	GSM7327468
	27398	L1	LEC	TC	Lamp5	GSM6812344				6438	D2	A46	FC	Vip	GSM6796365				4746	C3	V1C	OC	Vip	GSM6843557
	8101	D3	A46	FC	Lamp5	GSM6789906				126	A1	A5-A7	PC	Vip	GSM5422334				4658	C3	V1C	OC	Vip	GSM6842205
	27185	L1	LEC	TC	Lamp5	GSM6812108				20375	K1	M1C	FC	Lamp5	GSM6772856				4744	C3	V1C	OC	Vip	GSM6843529
	23349	K1	FI	FC	Lamp5	GSM6837855				12299	G1	V1C	OC	Lamp5	GSM6748233				18308	I3	MTG	TC	Vip	GSM7344299
	27885	L1	LEC	TC	Lamp5	GSM6812907				19408	J3	A24	FC	Sst	GSM6874382				18250	I3	MTG	TC	Sst	GSM7343561
	22226	J1	V1C	OC	Lamp5	GSM6742354				9504	E4	MTG	TC	Sst	GSM5162448				4685	C3	V1C	OC	Sst	GSM6842604
	4032	C1	A5	PC	Lamp5	GSM5408720				6452	D2	A46	FC	Vip	GSM6796567				4765	C3	V1C	OC	Pvalb	GSM6843990
	24553	K1	FI	FC	Lamp5	GSM6839154				19869	K1	M1C	FC	Pvalb	GSM6772138				15647	H3	A24	FC	Lamp5	GSM7339104
	19771	J1	V1C	OC	Lamp5	GSM6739512				6330	D2	A46	FC	Sst	GSM6794263				18289	I3	MTG	TC	Sst	GSM7344006
	26723	L1	LEC	TC	Lamp5	GSM6811586				12207	G1	V1C	OC	Lamp5	GSM6746992				4792	C3	V1C	OC	Lamp5	GSM6844261
	16938	H4	LEC	TC	Lamp5	GSM7149426				15	A1	A5-A7	PC	Lamp5	GSM5421708				4659	C3	V1C	OC	Vip	GSM6842215
	27854	L1	LEC	TC	Lamp5	GSM6812872				6287	D2	A46	FC	Pvalb	GSM6793672				13572	H1	MEC	TC	Sncg	GSM6367245
	23623	K1	FI	FC	Lamp5	GSM6838156				19391	J3	A24	FC	Vip	GSM6874077				4712	C3	V1C	OC	Vip	GSM6843098
	8909	D4	MTG	TC	Lamp5	GSM6800218				6309	D2	A46	FC	Sncg	GSM6793974				15752	H4	A46	FC	Sst	GSM7325430
	8914	D4	MTG	TC	Lamp5	GSM6798487				9500	E4	MTG	TC	Sst	GSM5162421				13213	G4	LEC	TC	Vip	GSM7320022
	23070	K1	FI	FC	Lamp5	GSM6837549				135	A1	A5-A7	PC	Pvalb	GSM5422385				16083	H4	A46	FC	Lamp5	GSM7327499
	8898	D4	MTG	TC	Lamp5	GSM6799793				20542	K1	M1C	FC	Sncg	GSM6773083				4775	C3	V1C	OC	Sst	GSM6844137
	17480	H4	LEC	TC	Lamp5	GSM7150490				7	A1	A5-A7	PC	Sst	GSM5421664				18279	I3	MTG	TC	Sst	GSM7343896
	26107	L1	LEC	TC	Lamp5	GSM6810896				12175	G1	V1C	OC	Vip	GSM6746604				15666	H3	A24	FC	Sncg	GSM7339810
	24651	K1	FI	FC	Lamp5	GSM6839261				102	A1	A5-A7	PC	Vip	GSM5422248				4784	C3	V1C	OC	Sst	GSM6844227
	4036	C1	A5	PC	Lamp5	GSM5409763				12263	G1	V1C	OC	Lamp5	GSM6747929				4684	C3	V1C	OC	Lamp5	GSM6842600
	23290	K1	FI	FC	Lamp5	GSM6837788				6281	D2	A46	FC	Pvalb	GSM6793621				16062	H4	A46	FC	Pvalb	GSM7327408
	23924	K1	FI	FC	Lamp5	GSM6838485				21395	L1	M1C	FC	Sst	GSM6779761				13024	G4	LEC	TC	Vip	GSM7318751
	26071	L1	LEC	TC	Lamp5	GSM6810852				20450	K1	M1C	FC	Lamp5	GSM6772974				18329	I3	MTG	TC	Sst	GSM7344555
	8917	D4	MTG	TC	Lamp5	GSM6799333				21040	K1	M1C	FC	Vip	GSM6773774				15937	H4	A46	FC	Vip	GSM7326498
	16972	H4	LEC	TC	Lamp5	GSM7149463				12286	G1	V1C	OC	Vip	GSM6748160				18314	I3	MTG	TC	Vip	GSM7344357
	27055	L1	LEC	TC	Lamp5	GSM6811963				9376	E4	MTG	TC	Sst	GSM5160982				12660	G3	V2	OC	Sst	GSM6325003
	8923	D4	MTG	TC	Lamp5	GSM6800080				12250	G1	V1C	OC	Lamp5	GSM6747728				13011	G4	LEC	TC	Vip	GSM7318697
	21852	J1	V1C	OC	Lamp5	GSM6741887				6392	D2	A46	FC	Sst	GSM6795469				16068	H4	A46	FC	Sst	GSM7327428
	16761	H4	LEC	TC	Lamp5	GSM7149209				12194	G1	V1C	OC	Sst	GSM6746745				15835	H4	A46	FC	Lamp5	GSM7325922
	8893	D4	MTG	TC	Lamp5	GSM6799544				6317	D2	A46	FC	Sncg	GSM6794092				16164	H4	A46	FC	Lamp5	GSM7328054
	25647	L1	LEC	TC	Lamp5	GSM6810371				20546	K1	M1C	FC	Vip	GSM6773089				4788	C3	V1C	OC	Lamp5	GSM6844233
	27841	L1	LEC	TC	Lamp5	GSM6812858				3	A1	A5-A7	PC	Vip	GSM5421574				18254	I3	MTG	TC	Vip	GSM7343591
	8096	D3	A46	FC	Lamp5	GSM6790543				6283	D2	A46	FC	Vip	GSM6793641				4796	C3	V1C	OC	Sst	GSM6844287
	16433	H3	A24	FC	Lamp5	GSM6869639				6297	D2	A46	FC	Vip	GSM6793767				4774	C3	V1C	OC	Lamp5	GSM6844112
	8920	D4	MTG	TC	Lamp5	GSM6799993				6424	D2	A46	FC	Vip	GSM6796182				18240	I3	MTG	TC	Vip	GSM7343479
	27082	L1	LEC	TC	Lamp5	GSM6811993				6426	D2	A46	FC	Pvalb	GSM6796189				4737	C3	V1C	OC	Vip	GSM6843472
	16957	H4	LEC	TC	Lamp5	GSM7149447				15908	I1	LEC	TC	Pvalb	GSM6786393				11423	G1	S1C	PC	Sst	GSM6307938
	25422	L1	LEC	TC	Lamp5	GSM6810125				91	A1	A5-A7	PC	Sst	GSM5422159				13154	G4	LEC	TC	Pvalb	GSM7319697
	24374	K1	FI	FC	Lamp5	GSM6838957				16959	I1	LEC	TC	Pvalb	GSM6787787				16059	H4	A46	FC	Sst	GSM7327400
	25687	L1	LEC	TC	Lamp5	GSM6810413				21501	L1	M1C	FC	Sst	GSM6780173				18351	I3	MTG	TC	Vip	GSM7344794
	4011	C1	A5	PC	Lamp5	GSM5408924				9411	E4	MTG	TC	Sst	GSM5161268				15797	H4	A46	FC	Pvalb	GSM7325689
	23999	K1	FI	FC	Lamp5	GSM6838562				19890	K1	M1C	FC	Lamp5	GSM6772165				13235	G4	LEC	TC	Lamp5	GSM7320115
	26111	L1	LEC	TC	Lamp5	GSM6810900				15317	I1	LEC	TC	Sst	GSM6785395				4790	C3	V1C	OC	Lamp5	GSM6844243
	27407	L1	LEC	TC	Lamp5	GSM6812368				17031	I1	LEC	TC	Vip	GSM6787867				15774	H4	A46	FC	Pvalb	GSM7325565
	4035	C1	A5	PC	Lamp5	GSM5409118				12277	G1	V1C	OC	Vip	GSM6748094				4622	C3	V1C	OC	Pvalb	GSM6841957
	23859	K1	FI	FC	Lamp5	GSM6838415				12245	G1	V1C	OC	Lamp5	GSM6747674				15771	H4	A46	FC	Vip	GSM7325534
	24745	K1	FI	FC	Lamp5	GSM6839356				6324	D2	A46	FC	Sst	GSM6794193				4747	C3	V1C	OC	Sst	GSM6843558
	21003	J1	V1C	OC	Lamp5	GSM6740909				19849	K1	M1C	FC	Sst	GSM6772113				4687	C3	V1C	OC	Sst	GSM6842640
	21950	J1	V1C	OC	Lamp5	GSM6741992				6335	D2	A46	FC	Lamp5	GSM6794385				13230	G4	LEC	TC	Lamp5	GSM7320104
	20738	J1	V1C	OC	Lamp5	GSM6740596				19854	K1	M1C	FC	Lamp5	GSM6772120				16064	H4	A46	FC	Pvalb	GSM7327413
	21768	J1	V1C	OC	Lamp5	GSM6741794				19952	K1	M1C	FC	Vip	GSM6772238				4618	C3	V1C	OC	Pvalb	GSM6841874
	26728	L1	LEC	TC	Lamp5	GSM6811591				20207	K1	M1C	FC	Vip	GSM6772578				18322	I3	MTG	TC	Pvalb	GSM7344484
	16666	H3	A24	FC	Lamp5	GSM6870524				9542	E4	MTG	TC	Vip	GSM5163152				16000	H4	A46	FC	Vip	GSM7327008
	20039	J1	V1C	OC	Lamp5	GSM6739811				16797	I1	LEC	TC	Pvalb	GSM6787577				15817	H4	A46	FC	Lamp5	GSM7325833
	4029	C1	A5	PC	Lamp5	GSM5408290				16083	I1	LEC	TC	Vip	GSM6786613				4764	C3	V1C	OC	Pvalb	GSM6843966
	21667	J1	V1C	OC	Lamp5	GSM6741676				21354	L1	M1C	FC	Lamp5	GSM6779596				4736	C3	V1C	OC	Lamp5	GSM6843424
	1210	A3	CA1C	HIP	Pvalb	GSM6159331				12283	G1	V1C	OC	Sncg	GSM6748139				15636	H3	A24	FC	Sst	GSM7338469
	26590	L1	LEC	TC	Pvalb	GSM6811440				19856	K1	M1C	FC	Sst	GSM6772122				16192	H4	A46	FC	Sncg	GSM7328191
	16572	H3	A24	FC	Pvalb	GSM6870230				6372	D2	A46	FC	Sst	GSM6795063				15994	H4	A46	FC	Vip	GSM7326973
	26533	L1	LEC	TC	Pvalb	GSM6811380				21598	L1	M1C	FC	Vip	GSM6780518				20781	J2	A24	FC	Sst	GSM6362057
	26526	L1	LEC	TC	Pvalb	GSM6811372				12	A1	A5-A7	PC	Pvalb	GSM5421692				4773	C3	V1C	OC	Vip	GSM6844110
	26374	L1	LEC	TC	Pvalb	GSM6811210				19387	J3	A24	FC	Vip	GSM6874012				15765	H4	A46	FC	Sst	GSM7325491
	26462	L1	LEC	TC	Pvalb	GSM6811304				77	A1	A5-A7	PC	Vip	GSM5422122				15758	H4	A46	FC	Vip	GSM7325451
	26578	L1	LEC	TC	Pvalb	GSM6811427				12195	G1	V1C	OC	Lamp5	GSM6746749				8282	E1	A19	OC	Vip	GSM6332464
	26338	L1	LEC	TC	Pvalb	GSM6811170				12289	G1	V1C	OC	Lamp5	GSM6748174				13304	G4	LEC	TC	Lamp5	GSM7320645
	26449	L1	LEC	TC	Pvalb	GSM6811290				6326	D2	A46	FC	Pvalb	GSM6794203				15644	H3	A24	FC	Vip	GSM7338764
	26376	L1	LEC	TC	Pvalb	GSM6811212				6451	D2	A46	FC	Sncg	GSM6796565				2505	B2	A44-A45	FC	Sncg	GSM6405644
	26602	L1	LEC	TC	Pvalb	GSM6811454				6285	D2	A46	FC	Pvalb	GSM6793652				4739	C3	V1C	OC	Sncg	GSM6843497
	26939	L1	LEC	TC	Pvalb	GSM6811835				19945	K1	M1C	FC	Pvalb	GSM6772230				16040	H4	A46	FC	Sncg	GSM7327317
	26575	L1	LEC	TC	Pvalb	GSM6811424				6361	D2	A46	FC	Sst	GSM6794921				16119	H4	A46	FC	Sst	GSM7327710
	26442	L1	LEC	TC	Pvalb	GSM6811283				21173	K1	M1C	FC	Sst	GSM6773965				18362	I3	MTG	TC	Pvalb	GSM7344927
	27014	L1	LEC	TC	Pvalb	GSM6811918				9546	E4	MTG	TC	Sst	GSM5163178				15679	H3	A24	FC	Vip	GSM7340187
	23574	K1	FI	FC	Pvalb	GSM6838099				19496	J3	A24	FC	Vip	GSM6875831				4766	C3	V1C	OC	Pvalb	GSM6843997
	26613	L1	LEC	TC	Pvalb	GSM6811468				6378	D2	A46	FC	Vip	GSM6795232				18246	I3	MTG	TC	Sst	GSM7343533
	8155	D3	A46	FC	Pvalb	GSM6789215				6322	D2	A46	FC	Sst	GSM6794147				18298	I3	MTG	TC	Vip	GSM7344150
	24040	K1	FI	FC	Pvalb	GSM6838604				19750	K1	M1C	FC	Vip	GSM6771979				15609	H3	A24	FC	Sst	GSM7337483
	26765	L1	LEC	TC	Pvalb	GSM6811638				15043	I1	LEC	TC	Sst	GSM6784960				15847	H4	A46	FC	Sst	GSM7325990
	8193	D3	A46	FC	Pvalb	GSM6791510				20552	K1	M1C	FC	Lamp5	GSM6773099				4710	C3	V1C	OC	Sst	GSM6843081
	24071	K1	FI	FC	Pvalb	GSM6838636				6360	D2	A46	FC	Sncg	GSM6794919				4702	C3	V1C	OC	Sst	GSM6842865
	27600	L1	LEC	TC	Pvalb	GSM6812582				6356	D2	A46	FC	Sst	GSM6794802				15658	H3	A24	FC	Lamp5	GSM7339625
	26547	L1	LEC	TC	Pvalb	GSM6811394				19466	J3	A24	FC	Pvalb	GSM6875298				18430	I3	MTG	TC	Sst	GSM7345866
	26388	L1	LEC	TC	Pvalb	GSM6811224				21747	L1	M1C	FC	Vip	GSM6781237				4707	C3	V1C	OC	Sst	GSM6842988
	26684	L1	LEC	TC	Pvalb	GSM6811546				6415	D2	A46	FC	Lamp5	GSM6796006				18408	I3	MTG	TC	Lamp5	GSM7345583
	26941	L1	LEC	TC	Pvalb	GSM6811837				21411	L1	M1C	FC	Lamp5	GSM6779842				16070	H4	A46	FC	Sst	GSM7327432
	25415	L1	LEC	TC	Pvalb	GSM6810118				6343	D2	A46	FC	Sst	GSM6794523				13038	G4	LEC	TC	Pvalb	GSM7318805
	26377	L1	LEC	TC	Pvalb	GSM6811213				20758	K1	M1C	FC	Vip	GSM6773382				13049	G4	LEC	TC	Lamp5	GSM7318936
	26433	L1	LEC	TC	Pvalb	GSM6811272				20159	K1	M1C	FC	Pvalb	GSM6772510				15759	H4	A46	FC	Pvalb	GSM7325455
	27629	L1	LEC	TC	Pvalb	GSM6812615				20333	K1	M1C	FC	Sst	GSM6772797				13202	G4	LEC	TC	Pvalb	GSM7319992
	27219	L1	LEC	TC	Pvalb	GSM6812143				20701	K1	M1C	FC	Vip	GSM6773312				18291	I3	MTG	TC	Sst	GSM7344018
	25801	L1	LEC	TC	Pvalb	GSM6810543				8843	E3	DGR-CA4Rpy	HIP	Lamp5	GSM5865805				16045	H4	A46	FC	Vip	GSM7327332
	26381	L1	LEC	TC	Pvalb	GSM6811217				20676	K1	M1C	FC	Sncg	GSM6773268				18242	I3	MTG	TC	Sst	GSM7343499
	17521	H4	LEC	TC	Pvalb	GSM7150551				6333	D2	A46	FC	Sst	GSM6794349				18299	I3	MTG	TC	Sst	GSM7344151
	27200	L1	LEC	TC	Pvalb	GSM6812124				21347	L1	M1C	FC	Sst	GSM6779563				16134	H4	A46	FC	Lamp5	GSM7327841
	27095	L1	LEC	TC	Pvalb	GSM6812008				21733	L1	M1C	FC	Sst	GSM6781147				8276	E1	A19	OC	Sncg	GSM6332318
	26475	L1	LEC	TC	Pvalb	GSM6811319				84	A1	A5-A7	PC	Sst	GSM5422142				18368	I3	MTG	TC	Pvalb	GSM7344956
	26631	L1	LEC	TC	Pvalb	GSM6811486				21713	L1	M1C	FC	Sst	GSM6781030				16135	H4	A46	FC	Pvalb	GSM7327842
	8136	D3	A46	FC	Pvalb	GSM6791156				32	A1	A5-A7	PC	Vip	GSM5421874				15852	H4	A46	FC	Sncg	GSM7326006
	25746	L1	LEC	TC	Pvalb	GSM6810482				6394	D2	A46	FC	Lamp5	GSM6795499				12922	G4	LEC	TC	Lamp5	GSM7318230
	26396	L1	LEC	TC	Pvalb	GSM6811232				49	A1	A5-A7	PC	Pvalb	GSM5421994				4787	C3	V1C	OC	Sst	GSM6844232
	27599	L1	LEC	TC	Pvalb	GSM6812581				16513	I1	LEC	TC	Pvalb	GSM6787223				13074	G4	LEC	TC	Sncg	GSM7319130
	26649	L1	LEC	TC	Pvalb	GSM6811507				23	A1	A5-A7	PC	Sst	GSM5421777				1703	A4	A46	FC	Sst	GSM6376381
	4113	C1	A5	PC	Pvalb	GSM5410282				20481	K1	M1C	FC	Pvalb	GSM6773013				15861	H4	A46	FC	Lamp5	GSM7326071
	26770	L1	LEC	TC	Pvalb	GSM6811643				6384	D2	A46	FC	Sncg	GSM6795261				16022	H4	A46	FC	Pvalb	GSM7327221
	25910	L1	LEC	TC	Pvalb	GSM6810671				19430	J3	A24	FC	Vip	GSM6874711				12918	G4	LEC	TC	Pvalb	GSM7318216
	26776	L1	LEC	TC	Pvalb	GSM6811649				9414	E4	MTG	TC	Pvalb	GSM5161284				16071	H4	A46	FC	Sst	GSM7327435
	8178	D3	A46	FC	Pvalb	GSM6789680				16331	I1	LEC	TC	Pvalb	GSM6786937				4725	C3	V1C	OC	Vip	GSM6843206
	27001	L1	LEC	TC	Pvalb	GSM6811905				9420	E4	MTG	TC	Sst	GSM5161314				15949	H4	A46	FC	Sncg	GSM7326573
	16369	H3	A24	FC	Pvalb	GSM6869346				6417	D2	A46	FC	Pvalb	GSM6796112				12934	G4	LEC	TC	Lamp5	GSM7318273
	23501	K1	FI	FC	Pvalb	GSM6838020				6444	D2	A46	FC	Sncg	GSM6796450				15998	H4	A46	FC	Vip	GSM7326987
	26437	L1	LEC	TC	Pvalb	GSM6811277				16132	I1	LEC	TC	Pvalb	GSM6786673				12942	G4	LEC	TC	Pvalb	GSM7318307
	26707	L1	LEC	TC	Pvalb	GSM6811570				20578	K1	M1C	FC	Vip	GSM6773134				1671	A4	A46	FC	Pvalb	GSM6375502
	26427	L1	LEC	TC	Pvalb	GSM6811266				6434	D2	A46	FC	Sst	GSM6796267				15751	H4	A46	FC	Pvalb	GSM7325424
	25817	L1	LEC	TC	Pvalb	GSM6810560				9367	E4	MTG	TC	Lamp5	GSM5160849				15927	H4	A46	FC	Vip	GSM7326462
	24202	K1	FI	FC	Pvalb	GSM6838775				21488	L1	M1C	FC	Pvalb	GSM6780134				15738	H4	A46	FC	Lamp5	GSM7325325
	26395	L1	LEC	TC	Pvalb	GSM6811231				3001	B4	V1C	OC	Sst	GSM7193139				16203	H4	A46	FC	Pvalb	GSM7328251
	23447	K1	FI	FC	Pvalb	GSM6837961				12240	G1	V1C	OC	Sst	GSM6747609				15786	H4	A46	FC	Sncg	GSM7325616
	16975	H4	LEC	TC	Pvalb	GSM7149466				6371	D2	A46	FC	Vip	GSM6795005				18273	I3	MTG	TC	Vip	GSM7343793
	25919	L1	LEC	TC	Pvalb	GSM6810682				9445	E4	MTG	TC	Vip	GSM5161655				8286	E1	A19	OC	Vip	GSM6332571
	24128	K1	FI	FC	Pvalb	GSM6838697				20230	K1	M1C	FC	Sst	GSM6772605				15831	H4	A46	FC	Lamp5	GSM7325901
	26508	L1	LEC	TC	Pvalb	GSM6811354				26	A1	A5-A7	PC	Sst	GSM5421815				18330	I3	MTG	TC	Vip	GSM7344580
	16372	H3	A24	FC	Pvalb	GSM6869359				15120	I1	LEC	TC	Lamp5	GSM6785061				12809	G4	LEC	TC	Sst	GSM7317760
	26830	L1	LEC	TC	Pvalb	GSM6811715				20296	K1	M1C	FC	Pvalb	GSM6772699				13499	H1	MEC	TC	Vip	GSM6366404
	26369	L1	LEC	TC	Pvalb	GSM6811205				69	A1	A5-A7	PC	Pvalb	GSM5422111				16123	H4	A46	FC	Pvalb	GSM7327723
	26419	L1	LEC	TC	Pvalb	GSM6811256				12215	G1	V1C	OC	Lamp5	GSM6747116				18280	I3	MTG	TC	Sncg	GSM7343906
	25809	L1	LEC	TC	Pvalb	GSM6810551				9521	E4	MTG	TC	Pvalb	GSM5162768				18239	I3	MTG	TC	Vip	GSM7343478
	25926	L1	LEC	TC	Pvalb	GSM6810690				6303	D2	A46	FC	Sst	GSM6793819				18817	J1	V1C	OC	Sst	GSM6707689
	26890	L1	LEC	TC	Pvalb	GSM6811779				6328	D2	A46	FC	Sst	GSM6794224				15775	H4	A46	FC	Lamp5	GSM7325566
	27023	L1	LEC	TC	Pvalb	GSM6811927				6388	D2	A46	FC	Sst	GSM6795412				16163	H4	A46	FC	Lamp5	GSM7328051
	26967	L1	LEC	TC	Pvalb	GSM6811870				20465	K1	M1C	FC	Sst	GSM6772995				13166	G4	LEC	TC	Lamp5	GSM7319733
	26796	L1	LEC	TC	Pvalb	GSM6811675				16938	I1	LEC	TC	Pvalb	GSM6787757				15743	H4	A46	FC	Vip	GSM7325350
	22928	K1	FI	FC	Pvalb	GSM6837399				20369	K1	M1C	FC	Sst	GSM6772847				15802	H4	A46	FC	Pvalb	GSM7325731
	23476	K1	FI	FC	Pvalb	GSM6837994				12198	G1	V1C	OC	Vip	GSM6746826				16001	H4	A46	FC	Pvalb	GSM7327017
	24093	K1	FI	FC	Pvalb	GSM6838660				6398	D2	A46	FC	Lamp5	GSM6795536				8275	E1	A19	OC	Pvalb	GSM6332235
	16350	H3	A24	FC	Pvalb	GSM6869290				12230	G1	V1C	OC	Vip	GSM6747499				15779	H4	A46	FC	Pvalb	GSM7325591
	24200	K1	FI	FC	Pvalb	GSM6838773				6355	D2	A46	FC	Vip	GSM6794794				15830	H4	A46	FC	Vip	GSM7325900
	24201	K1	FI	FC	Pvalb	GSM6838774				6350	D2	A46	FC	Pvalb	GSM6794646				13191	G4	LEC	TC	Lamp5	GSM7319931
	8166	D3	A46	FC	Pvalb	GSM6790073				21222	K1	M1C	FC	Pvalb	GSM6774048				16158	H4	A46	FC	Sst	GSM7328009
	26887	L1	LEC	TC	Pvalb	GSM6811776				21448	L1	M1C	FC	Sst	GSM6779977				18278	I3	MTG	TC	Vip	GSM7343852
	24045	K1	FI	FC	Pvalb	GSM6838610				21100	K1	M1C	FC	Pvalb	GSM6773863				13006	G4	LEC	TC	Lamp5	GSM7318687
	24097	K1	FI	FC	Pvalb	GSM6838664				19517	J3	A24	FC	Sncg	GSM6876272				13151	G4	LEC	TC	Lamp5	GSM7319681
	26800	L1	LEC	TC	Pvalb	GSM6811680				20621	K1	M1C	FC	Sst	GSM6773196				15960	H4	A46	FC	Pvalb	GSM7326632
	26816	L1	LEC	TC	Pvalb	GSM6811697				12293	G1	V1C	OC	Sst	GSM6748206				15675	H3	A24	FC	Sncg	GSM7340025
	26947	L1	LEC	TC	Pvalb	GSM6811844				9353	E4	MTG	TC	Sst	GSM5160557				14584	H2	Pro	OC	Sst	GSM6677840
	25823	L1	LEC	TC	Pvalb	GSM6810566				9362	E4	MTG	TC	Sst	GSM5160753				15810	H4	A46	FC	Sst	GSM7325780
	23390	K1	FI	FC	Pvalb	GSM6837899				20539	K1	M1C	FC	Pvalb	GSM6773080				4721	C3	V1C	OC	Sst	GSM6843159
	26940	L1	LEC	TC	Pvalb	GSM6811836				8854	E3	DGR-CA4Rpy	HIP	Sncg	GSM5865933				16061	H4	A46	FC	Pvalb	GSM7327403
	27140	L1	LEC	TC	Pvalb	GSM6812058				19479	J3	A24	FC	Vip	GSM6875537				15754	H4	A46	FC	Vip	GSM7325433
	26633	L1	LEC	TC	Pvalb	GSM6811488				6427	D2	A46	FC	Pvalb	GSM6796205				4657	C3	V1C	OC	Pvalb	GSM6842203
	27508	L1	LEC	TC	Pvalb	GSM6812481				6292	D2	A46	FC	Vip	GSM6793741				18286	I3	MTG	TC	Pvalb	GSM7343977
	26772	L1	LEC	TC	Pvalb	GSM6811645				12235	G1	V1C	OC	Vip	GSM6747582				15885	H4	A46	FC	Sst	GSM7326220
	25414	L1	LEC	TC	Pvalb	GSM6810117				9386	E4	MTG	TC	Lamp5	GSM5161077				15985	H4	A46	FC	Sncg	GSM7326825
	16307	H3	A24	FC	Pvalb	GSM6869176				17024	I1	LEC	TC	Lamp5	GSM6787858				18372	I3	MTG	TC	Sst	GSM7345011
	26423	L1	LEC	TC	Pvalb	GSM6811262				6359	D2	A46	FC	Pvalb	GSM6794915				12810	G4	LEC	TC	Lamp5	GSM7317769
	26562	L1	LEC	TC	Pvalb	GSM6811410				19395	J3	A24	FC	Pvalb	GSM6874137				15936	H4	A46	FC	Vip	GSM7326495
	26935	L1	LEC	TC	Pvalb	GSM6811831				6429	D2	A46	FC	Lamp5	GSM6796218				12926	G4	LEC	TC	Pvalb	GSM7318241
	1205	A3	CA1C	HIP	Pvalb	GSM6159834				101	A1	A5-A7	PC	Sst	GSM5422242				4706	C3	V1C	OC	Lamp5	GSM6842987
	24696	K1	FI	FC	Pvalb	GSM6839306				6409	D2	A46	FC	Vip	GSM6795874				18345	I3	MTG	TC	Vip	GSM7344730
	25388	L1	LEC	TC	Pvalb	GSM6810090				6448	D2	A46	FC	Lamp5	GSM6796548				16205	H4	A46	FC	Sncg	GSM7328256
	25590	L1	LEC	TC	Pvalb	GSM6810311				6345	D2	A46	FC	Pvalb	GSM6794530				15753	H4	A46	FC	Sncg	GSM7325432
	8925	D4	MTG	TC	Pvalb	GSM6799043				20187	K1	M1C	FC	Pvalb	GSM6772547				16165	H4	A46	FC	Sst	GSM7328057
	25996	L1	LEC	TC	Pvalb	GSM6810768				6289	D2	A46	FC	Sst	GSM6793691				16179	H4	A46	FC	Vip	GSM7328135
	26542	L1	LEC	TC	Pvalb	GSM6811389				12268	G1	V1C	OC	Pvalb	GSM6747966				13243	G4	LEC	TC	Pvalb	GSM7320141
	24130	K1	FI	FC	Pvalb	GSM6838699				20146	K1	M1C	FC	Sncg	GSM6772497				15815	H4	A46	FC	Vip	GSM7325816
	24143	K1	FI	FC	Pvalb	GSM6838712				6347	D2	A46	FC	Pvalb	GSM6794542				12837	G4	LEC	TC	Vip	GSM7317884
	26650	L1	LEC	TC	Pvalb	GSM6811509				105	A1	A5-A7	PC	Pvalb	GSM5422260				18395	I3	MTG	TC	Vip	GSM7345401
	22890	K1	FI	FC	Pvalb	GSM6837357				12190	G1	V1C	OC	Sncg	GSM6746718				15638	H3	A24	FC	Vip	GSM7338533
	26787	L1	LEC	TC	Pvalb	GSM6811664				6387	D2	A46	FC	Sst	GSM6795396				16172	H4	A46	FC	Sst	GSM7328103
	25864	L1	LEC	TC	Pvalb	GSM6810617				20604	K1	M1C	FC	Sst	GSM6773171				4771	C3	V1C	OC	Vip	GSM6844071
	26541	L1	LEC	TC	Pvalb	GSM6811388				16936	I1	LEC	TC	Sst	GSM6787755				15881	H4	A46	FC	Sncg	GSM7326191
	26858	L1	LEC	TC	Pvalb	GSM6811744				6446	D2	A46	FC	Lamp5	GSM6796498				12931	G4	LEC	TC	Vip	GSM7318255
	27417	L1	LEC	TC	Pvalb	GSM6812379				80	A1	A5-A7	PC	Lamp5	GSM5422127				2586	B2	A44-A45	FC	Lamp5	GSM6407155
	8156	D3	A46	FC	Pvalb	GSM6789224				20424	K1	M1C	FC	Pvalb	GSM6772940				15839	H4	A46	FC	Pvalb	GSM7325940
	26885	L1	LEC	TC	Pvalb	GSM6811774				1	A1	A5-A7	PC	Pvalb	GSM5421537				16076	H4	A46	FC	Vip	GSM7327461
	16316	H3	A24	FC	Pvalb	GSM6869190				12285	G1	V1C	OC	Sst	GSM6748154				18306	I3	MTG	TC	Sst	GSM7344276
	25614	L1	LEC	TC	Pvalb	GSM6810336				20151	K1	M1C	FC	Vip	GSM6772502				15740	H4	A46	FC	Vip	GSM7325334
	23269	K1	FI	FC	Pvalb	GSM6837764				20003	K1	M1C	FC	Pvalb	GSM6772321				15635	H3	A24	FC	Pvalb	GSM7338468
	25822	L1	LEC	TC	Pvalb	GSM6810565				20438	K1	M1C	FC	Pvalb	GSM6772960				18354	I3	MTG	TC	Vip	GSM7344845
	26988	L1	LEC	TC	Pvalb	GSM6811892				15820	I1	LEC	TC	Sst	GSM6786270				18275	I3	MTG	TC	Sst	GSM7343801
	26911	L1	LEC	TC	Pvalb	GSM6811802				15824	I1	LEC	TC	Vip	GSM6786276				15615	H3	A24	FC	Pvalb	GSM7337666
	22895	K1	FI	FC	Pvalb	GSM6837362				6382	D2	A46	FC	Sncg	GSM6795256				13031	G4	LEC	TC	Lamp5	GSM7318788
	24006	K1	FI	FC	Pvalb	GSM6838569				6370	D2	A46	FC	Sst	GSM6794999				13157	G4	LEC	TC	Vip	GSM7319700
	25882	L1	LEC	TC	Pvalb	GSM6810636				20533	K1	M1C	FC	Pvalb	GSM6773074				12839	G4	LEC	TC	Lamp5	GSM7317887
	8182	D3	A46	FC	Pvalb	GSM6788987				6440	D2	A46	FC	Vip	GSM6796386				18447	I3	MTG	TC	Lamp5	GSM7346041
	25832	L1	LEC	TC	Pvalb	GSM6810575				20904	K1	M1C	FC	Sncg	GSM6773583				13056	G4	LEC	TC	Vip	GSM7318974
	26837	L1	LEC	TC	Pvalb	GSM6811722				21494	L1	M1C	FC	Sst	GSM6780151				18304	I3	MTG	TC	Pvalb	GSM7344236
	24872	K1	FI	FC	Pvalb	GSM6839489				6373	D2	A46	FC	Vip	GSM6795069				18287	I3	MTG	TC	Pvalb	GSM7343987
	25470	L1	LEC	TC	Pvalb	GSM6810180				20005	K1	M1C	FC	Vip	GSM6772323				18440	I3	MTG	TC	Pvalb	GSM7345973
	16339	H3	A24	FC	Pvalb	GSM6869261				6369	D2	A46	FC	Pvalb	GSM6794993				15737	H4	A46	FC	Sncg	GSM7325318
	21815	J1	V1C	OC	Pvalb	GSM6741848				19943	K1	M1C	FC	Vip	GSM6772228				12935	G4	LEC	TC	Sncg	GSM7318276
	16365	H3	A24	FC	Pvalb	GSM6869333				6300	D2	A46	FC	Pvalb	GSM6793783				12881	G4	LEC	TC	Vip	GSM7318050
	23320	K1	FI	FC	Pvalb	GSM6837820				6400	D2	A46	FC	Vip	GSM6795579				16190	H4	A46	FC	Vip	GSM7328181
	4069	C1	A5	PC	Pvalb	GSM5408303				20144	K1	M1C	FC	Vip	GSM6772495				16072	H4	A46	FC	Sst	GSM7327441
	24481	K1	FI	FC	Pvalb	GSM6839076				6450	D2	A46	FC	Lamp5	GSM6796564				16195	H4	A46	FC	Vip	GSM7328214
	27295	L1	LEC	TC	Pvalb	GSM6812231				18180	J1	MEC	TC	Lamp5	GSM6228768				12885	G4	LEC	TC	Lamp5	GSM7318068
	23467	K1	FI	FC	Pvalb	GSM6837984				16676	I1	LEC	TC	Sncg	GSM6787429				1136	A3	FI	FC	Lamp5	GSM6371183
	26991	L1	LEC	TC	Pvalb	GSM6811895				6310	D2	A46	FC	Vip	GSM6794034				15607	H3	A24	FC	Sst	GSM7337443
	22911	K1	FI	FC	Pvalb	GSM6837382				21475	L1	M1C	FC	Vip	GSM6780082				18394	I3	MTG	TC	Lamp5	GSM7345397
	26268	L1	LEC	TC	Pvalb	GSM6811087				12242	G1	V1C	OC	Vip	GSM6747625				13036	G4	LEC	TC	Vip	GSM7318802
	8137	D3	A46	FC	Pvalb	GSM6791418				19619	K1	M1C	FC	Lamp5	GSM6771810				18375	I3	MTG	TC	Lamp5	GSM7345047
	25626	L1	LEC	TC	Pvalb	GSM6810349				6286	D2	A46	FC	Pvalb	GSM6793664				12836	G4	LEC	TC	Vip	GSM7317883
	8154	D3	A46	FC	Pvalb	GSM6789187				6423	D2	A46	FC	Sst	GSM6796172				18241	I3	MTG	TC	Sst	GSM7343482
	23186	K1	FI	FC	Pvalb	GSM6837672				6399	D2	A46	FC	Lamp5	GSM6795575				18849	J1	V1C	OC	Pvalb	GSM6708030
	4045	C1	A5	PC	Pvalb	GSM5407286				21350	L1	M1C	FC	Pvalb	GSM6779574				13350	G4	LEC	TC	Sncg	GSM7320914
	23302	K1	FI	FC	Pvalb	GSM6837802				48	A1	A5-A7	PC	Sncg	GSM5421986				15996	H4	A46	FC	Vip	GSM7326979
	25595	L1	LEC	TC	Pvalb	GSM6810316				16021	I1	LEC	TC	Lamp5	GSM6786537				16020	H4	A46	FC	Pvalb	GSM7327216
	8938	D4	MTG	TC	Pvalb	GSM6798456				103	A1	A5-A7	PC	Pvalb	GSM5422249				13219	G4	LEC	TC	Vip	GSM7320053
	8130	D3	A46	FC	Pvalb	GSM6790168				4	A1	A5-A7	PC	Vip	GSM5421616				16176	H4	A46	FC	Sst	GSM7328121
	19924	J1	V1C	OC	Pvalb	GSM6739677				9341	E4	MTG	TC	Vip	GSM5160484				15803	H4	A46	FC	Pvalb	GSM7325733
	12984	F4	CA1R	HIP	Pvalb	GSM5881163				16126	I1	LEC	TC	Lamp5	GSM6786667				15990	H4	A46	FC	Sst	GSM7326937
	24043	K1	FI	FC	Pvalb	GSM6838608				6406	D2	A46	FC	Pvalb	GSM6795816				16089	H4	A46	FC	Vip	GSM7327538
	26672	L1	LEC	TC	Pvalb	GSM6811534				6441	D2	A46	FC	Lamp5	GSM6796397				15756	H4	A46	FC	Lamp5	GSM7325446
	26691	L1	LEC	TC	Pvalb	GSM6811553				9351	E4	MTG	TC	Lamp5	GSM5160553				18301	I3	MTG	TC	Vip	GSM7344199
	27079	L1	LEC	TC	Pvalb	GSM6811990				15172	I1	LEC	TC	Lamp5	GSM6785125				15846	H4	A46	FC	Sst	GSM7325987
	25275	K1	FI	FC	Pvalb	GSM6839929				12291	G1	V1C	OC	Vip	GSM6748187				15760	H4	A46	FC	Sst	GSM7325479
	27573	L1	LEC	TC	Pvalb	GSM6812552				9338	E4	MTG	TC	Vip	GSM5160460				15832	H4	A46	FC	Pvalb	GSM7325909
	8125	D3	A46	FC	Pvalb	GSM6789044				19388	J3	A24	FC	Vip	GSM6874017				20837	J2	A24	FC	Vip	GSM6362955
	8140	D3	A46	FC	Pvalb	GSM6789043				11740	F4	CA1R-CA2R-CA3R	HIP	Vip	GSM5868333				18325	I3	MTG	TC	Vip	GSM7344521
	27221	L1	LEC	TC	Pvalb	GSM6812145				6312	D2	A46	FC	Sst	GSM6794060				12817	G4	LEC	TC	Vip	GSM7317800
	23515	K1	FI	FC	Pvalb	GSM6838035				6358	D2	A46	FC	Vip	GSM6794907				16004	H4	A46	FC	Sncg	GSM7327067
	26398	L1	LEC	TC	Pvalb	GSM6811234				12251	G1	V1C	OC	Vip	GSM6747740				12661	G3	V2	OC	Pvalb	GSM6325017
	27241	L1	LEC	TC	Pvalb	GSM6812169				19493	J3	A24	FC	Sncg	GSM6875787				12923	G4	LEC	TC	Lamp5	GSM7318231
	4116	C1	A5	PC	Pvalb	GSM5408254				12187	G1	V1C	OC	Sst	GSM6746697				16067	H4	A46	FC	Sncg	GSM7327425
	25588	L1	LEC	TC	Pvalb	GSM6810309				17065	I1	LEC	TC	Vip	GSM6787903				16168	H4	A46	FC	Pvalb	GSM7328075
	23989	K1	FI	FC	Pvalb	GSM6838551				12177	G1	V1C	OC	Lamp5	GSM6746616				16065	H4	A46	FC	Sst	GSM7327419
	27617	L1	LEC	TC	Pvalb	GSM6812602				6425	D2	A46	FC	Lamp5	GSM6796183				15975	H4	A46	FC	Vip	GSM7326703
	4065	C1	A5	PC	Pvalb	GSM5408230				21042	K1	M1C	FC	Pvalb	GSM6773777				15941	H4	A46	FC	Pvalb	GSM7326508
	23250	K1	FI	FC	Pvalb	GSM6837744				19940	K1	M1C	FC	Sst	GSM6772222				18376	I3	MTG	TC	Pvalb	GSM7345064
	24717	K1	FI	FC	Pvalb	GSM6839327				20307	K1	M1C	FC	Sst	GSM6772758				15656	H3	A24	FC	Sncg	GSM7339619
	27064	L1	LEC	TC	Pvalb	GSM6811973				18	A1	A5-A7	PC	Vip	GSM5421735				15798	H4	A46	FC	Sncg	GSM7325691
	24723	K1	FI	FC	Pvalb	GSM6839333				6314	D2	A46	FC	Lamp5	GSM6794071				16174	H4	A46	FC	Vip	GSM7328111
	26815	L1	LEC	TC	Pvalb	GSM6811696				6377	D2	A46	FC	Pvalb	GSM6795231				16010	H4	A46	FC	Lamp5	GSM7327111
	23368	K1	FI	FC	Pvalb	GSM6837876				6413	D2	A46	FC	Pvalb	GSM6795907				15642	H3	A24	FC	Sst	GSM7338642
	8176	D3	A46	FC	Pvalb	GSM6791839				9405	E4	MTG	TC	Pvalb	GSM5161225				18424	I3	MTG	TC	Vip	GSM7345791
	25523	L1	LEC	TC	Pvalb	GSM6810237				6337	D2	A46	FC	Vip	GSM6794389				15931	H4	A46	FC	Pvalb	GSM7326476
	23151	K1	FI	FC	Pvalb	GSM6837635				9330	E4	MTG	TC	Vip	GSM5160206				18319	I3	MTG	TC	Vip	GSM7344440
	8924	D4	MTG	TC	Pvalb	GSM6798789				9402	E4	MTG	TC	Vip	GSM5161208				18238	I3	MTG	TC	Sst	GSM7343466
	26370	L1	LEC	TC	Pvalb	GSM6811206				16682	I1	LEC	TC	Lamp5	GSM6787435				15867	H4	A46	FC	Sst	GSM7326113
	8126	D3	A46	FC	Pvalb	GSM6789177				6353	D2	A46	FC	Pvalb	GSM6794768				18851	J1	V1C	OC	Vip	GSM6708050
	8159	D3	A46	FC	Pvalb	GSM6789251				21682	L1	M1C	FC	Pvalb	GSM6780927				18431	I3	MTG	TC	Lamp5	GSM7345871
	27255	L1	LEC	TC	Pvalb	GSM6812184				16979	I1	LEC	TC	Pvalb	GSM6787808				15880	H4	A46	FC	Pvalb	GSM7326189
	22892	K1	FI	FC	Pvalb	GSM6837359				6344	D2	A46	FC	Sncg	GSM6794528				18336	I3	MTG	TC	Sst	GSM7344627
	25659	L1	LEC	TC	Pvalb	GSM6810384				6435	D2	A46	FC	Sncg	GSM6796277				13135	G4	LEC	TC	Sncg	GSM7319614
	27161	L1	LEC	TC	Pvalb	GSM6812083				6454	D2	A46	FC	Sst	GSM6796587				13177	G4	LEC	TC	Pvalb	GSM7319832
	26457	L1	LEC	TC	Pvalb	GSM6811299				19888	K1	M1C	FC	Sst	GSM6772163				15940	H4	A46	FC	Sst	GSM7326507
	24887	K1	FI	FC	Pvalb	GSM6839506				19894	K1	M1C	FC	Sst	GSM6772169				13103	G4	LEC	TC	Vip	GSM7319323
	25669	L1	LEC	TC	Pvalb	GSM6810394				70	A1	A5-A7	PC	Sst	GSM5422112				16051	H4	A46	FC	Sst	GSM7327368
	25658	L1	LEC	TC	Pvalb	GSM6810383				12237	G1	V1C	OC	Sst	GSM6747589				18339	I3	MTG	TC	Sst	GSM7344648
	26298	L1	LEC	TC	Pvalb	GSM6811123				6329	D2	A46	FC	Sst	GSM6794233				16197	H4	A46	FC	Sst	GSM7328224
	24116	K1	FI	FC	Pvalb	GSM6838684				6320	D2	A46	FC	Vip	GSM6794134				15939	H4	A46	FC	Vip	GSM7326502
	24689	K1	FI	FC	Pvalb	GSM6839299				19999	K1	M1C	FC	Lamp5	GSM6772315				16152	H4	A46	FC	Sst	GSM7327977
	16694	H3	A24	FC	Pvalb	GSM6870580				6367	D2	A46	FC	Pvalb	GSM6794963				20825	J2	A24	FC	Vip	GSM6362458
	24135	K1	FI	FC	Pvalb	GSM6838704				6445	D2	A46	FC	Pvalb	GSM6796454				18919	J1	V1C	OC	Sst	GSM6708776
	24652	K1	FI	FC	Pvalb	GSM6839262				21717	L1	M1C	FC	Pvalb	GSM6781052				16014	H4	A46	FC	Lamp5	GSM7327150
	8145	D3	A46	FC	Pvalb	GSM6789985				52	A1	A5-A7	PC	Pvalb	GSM5422031				15929	H4	A46	FC	Pvalb	GSM7326469
	25901	L1	LEC	TC	Pvalb	GSM6810662				15944	I1	LEC	TC	Pvalb	GSM6786435				18337	I3	MTG	TC	Pvalb	GSM7344640
	24139	K1	FI	FC	Pvalb	GSM6838708				23437	M2	LEC	TC	Pvalb	GSM7153412				13007	G4	LEC	TC	Sncg	GSM7318693
	26489	L1	LEC	TC	Pvalb	GSM6811334				6280	D2	A46	FC	Sst	GSM6793616				16011	H4	A46	FC	Sst	GSM7327112
	23417	K1	FI	FC	Pvalb	GSM6837930				12210	G1	V1C	OC	Vip	GSM6747076				16104	H4	A46	FC	Lamp5	GSM7327616
	26701	L1	LEC	TC	Pvalb	GSM6811564				16662	I1	LEC	TC	Lamp5	GSM6787414				18363	I3	MTG	TC	Pvalb	GSM7344934
	27304	L1	LEC	TC	Pvalb	GSM6812241				130	A1	A5-A7	PC	Pvalb	GSM5422359				15630	H3	A24	FC	Sst	GSM7338277
	22941	K1	FI	FC	Pvalb	GSM6837412				9348	E4	MTG	TC	Lamp5	GSM5160532				15825	H4	A46	FC	Lamp5	GSM7325884
	24180	K1	FI	FC	Pvalb	GSM6838752				6447	D2	A46	FC	Sst	GSM6796527				12938	G4	LEC	TC	Vip	GSM7318284
	8929	D4	MTG	TC	Pvalb	GSM6798892				9513	E4	MTG	TC	Sst	GSM5162488				15680	H3	A24	FC	Vip	GSM7340190
	23249	K1	FI	FC	Pvalb	GSM6837743				19415	J3	A24	FC	Sncg	GSM6874510				15816	H4	A46	FC	Pvalb	GSM7325826
	23658	K1	FI	FC	Pvalb	GSM6838193				16753	I1	LEC	TC	Sncg	GSM6787524				15748	H4	A46	FC	Sst	GSM7325400
	24113	K1	FI	FC	Pvalb	GSM6838681				6313	D2	A46	FC	Sst	GSM6794068				16141	H4	A46	FC	Pvalb	GSM7327878
	8933	D4	MTG	TC	Pvalb	GSM6799025				6442	D2	A46	FC	Vip	GSM6796406				18413	I3	MTG	TC	Vip	GSM7345655
	8199	D3	A46	FC	Pvalb	GSM6791927				21391	L1	M1C	FC	Sst	GSM6779744				18727	J1	V1C	OC	Sst	GSM6706790
	8153	D3	A46	FC	Pvalb	GSM6789178				6290	D2	A46	FC	Vip	GSM6793719				15646	H3	A24	FC	Vip	GSM7339022
	23497	K1	FI	FC	Pvalb	GSM6838016				6390	D2	A46	FC	Pvalb	GSM6795450				13209	G4	LEC	TC	Lamp5	GSM7320010
	27142	L1	LEC	TC	Pvalb	GSM6812061				20572	K1	M1C	FC	Sst	GSM6773127				18448	I3	MTG	TC	Pvalb	GSM7346077
	25987	L1	LEC	TC	Pvalb	GSM6810758				44	A1	A5-A7	PC	Sst	GSM5421939				18456	I3	MTG	TC	Vip	GSM7346195
	26027	L1	LEC	TC	Pvalb	GSM6810802				21525	L1	M1C	FC	Sncg	GSM6780251				12920	G4	LEC	TC	Pvalb	GSM7318223
	27572	L1	LEC	TC	Pvalb	GSM6812551				9527	E4	MTG	TC	Lamp5	GSM5162857				18449	I3	MTG	TC	Sst	GSM7346085
	16650	H3	A24	FC	Pvalb	GSM6870494				16410	I1	LEC	TC	Sncg	GSM6787073				12411	G2	M1C	FC	Pvalb	GSM6317148
	25248	K1	FI	FC	Pvalb	GSM6839899				12280	G1	V1C	OC	Sst	GSM6748123				13261	G4	LEC	TC	Vip	GSM7320255
	23081	K1	FI	FC	Pvalb	GSM6837561				9423	E4	MTG	TC	Lamp5	GSM5161338				15634	H3	A24	FC	Sncg	GSM7338461
	8141	D3	A46	FC	Pvalb	GSM6789207				12229	G1	V1C	OC	Pvalb	GSM6747490				15741	H4	A46	FC	Sncg	GSM7325338
	23150	K1	FI	FC	Pvalb	GSM6837634				16895	I1	LEC	TC	Pvalb	GSM6787712				18231	I3	MTG	TC	Pvalb	GSM7343430
	22333	J1	V1C	OC	Pvalb	GSM6742470				50	A1	A5-A7	PC	Sst	GSM5422016				12340	G2	M1C	FC	Lamp5	GSM6315306
	27228	L1	LEC	TC	Pvalb	GSM6812152				9425	E4	MTG	TC	Sst	GSM5161344				12879	G4	LEC	TC	Lamp5	GSM7318046
	26247	L1	LEC	TC	Pvalb	GSM6811062				23434	M2	LEC	TC	Pvalb	GSM7153383				13055	G4	LEC	TC	Vip	GSM7318972
	24022	K1	FI	FC	Pvalb	GSM6838586				6405	D2	A46	FC	Sst	GSM6795743				15982	H4	A46	FC	Sst	GSM7326799
	4115	C1	A5	PC	Pvalb	GSM5407387				19489	J3	A24	FC	Vip	GSM6875655				18415	I3	MTG	TC	Pvalb	GSM7345677
	23221	K1	FI	FC	Pvalb	GSM6837711				12294	G1	V1C	OC	Lamp5	GSM6748210				18230	I3	MTG	TC	Sst	GSM7343416
	8142	D3	A46	FC	Pvalb	GSM6789246				17084	I1	LEC	TC	Pvalb	GSM6787927				18321	I3	MTG	TC	Sst	GSM7344459
	26245	L1	LEC	TC	Pvalb	GSM6811058				21330	L1	M1C	FC	Sst	GSM6779492				15614	H3	A24	FC	Vip	GSM7337661
	24147	K1	FI	FC	Pvalb	GSM6838716				21722	L1	M1C	FC	Sst	GSM6781057				16055	H4	A46	FC	Pvalb	GSM7327385
	24814	K1	FI	FC	Pvalb	GSM6839429				9360	E4	MTG	TC	Sst	GSM5160699				8296	E1	A19	OC	Sncg	GSM6332796
	4059	C1	A5	PC	Pvalb	GSM5408142				6304	D2	A46	FC	Vip	GSM6793831				18457	I3	MTG	TC	Pvalb	GSM7346205
	24262	K1	FI	FC	Pvalb	GSM6838838				6338	D2	A46	FC	Vip	GSM6794396				16186	H4	A46	FC	Pvalb	GSM7328173
	25894	L1	LEC	TC	Pvalb	GSM6810654				6403	D2	A46	FC	Sst	GSM6795698				18277	I3	MTG	TC	Sst	GSM7343832
	24038	K1	FI	FC	Pvalb	GSM6838602				21676	L1	M1C	FC	Sst	GSM6780910				15983	H4	A46	FC	Sncg	GSM7326804
	26054	L1	LEC	TC	Pvalb	GSM6810834				12176	G1	V1C	OC	Lamp5	GSM6746609				13136	G4	LEC	TC	Vip	GSM7319615
	25004	K1	FI	FC	Pvalb	GSM6839642				6302	D2	A46	FC	Pvalb	GSM6793814				15956	H4	A46	FC	Lamp5	GSM7326602
	8180	D3	A46	FC	Pvalb	GSM6790342				21028	K1	M1C	FC	Pvalb	GSM6773760				12898	G4	LEC	TC	Pvalb	GSM7318151
	8181	D3	A46	FC	Pvalb	GSM6788968				67	A1	A5-A7	PC	Sncg	GSM5422096				12427	G2	M1C	FC	Sst	GSM6318028
	8946	D4	MTG	TC	Pvalb	GSM6799822				6351	D2	A46	FC	Sst	GSM6794647				12870	G4	LEC	TC	Pvalb	GSM7318019
	27607	L1	LEC	TC	Pvalb	GSM6812591				6305	D2	A46	FC	Vip	GSM6793837				13221	G4	LEC	TC	Sncg	GSM7320060
	23388	K1	FI	FC	Pvalb	GSM6837897				6457	D2	A46	FC	Vip	GSM6796626				15809	H4	A46	FC	Lamp5	GSM7325777
	23536	K1	FI	FC	Pvalb	GSM6838057				20915	K1	M1C	FC	Lamp5	GSM6773598				18341	I3	MTG	TC	Vip	GSM7344653
	12329	F2	V1C	OC	Pvalb	GSM7190237				20503	K1	M1C	FC	Pvalb	GSM6773039				16091	H4	A46	FC	Vip	GSM7327554
	26619	L1	LEC	TC	Pvalb	GSM6811474				21684	L1	M1C	FC	Pvalb	GSM6780937				16027	H4	A46	FC	Lamp5	GSM7327257
	27842	L1	LEC	TC	Pvalb	GSM6812859				12255	G1	V1C	OC	Sst	GSM6747771				13051	G4	LEC	TC	Lamp5	GSM7318942
	24222	K1	FI	FC	Pvalb	GSM6838795				12166	G1	V1C	OC	Pvalb	GSM6746183				15842	H4	A46	FC	Pvalb	GSM7325961
	27257	L1	LEC	TC	Pvalb	GSM6812187				21569	L1	M1C	FC	Sst	GSM6780441				4034	C1	DGR	HIP	Pvalb	GSM6563463
	27298	L1	LEC	TC	Pvalb	GSM6812235				11685	F4	CA1R-CA2R-CA3R	HIP	Sst	GSM5867648				18256	I3	MTG	TC	Sst	GSM7343608
	23761	K1	FI	FC	Pvalb	GSM6838305				9417	E4	MTG	TC	Vip	GSM5161300				16150	H4	A46	FC	Sst	GSM7327969
	8127	D3	A46	FC	Pvalb	GSM6789235				36	A1	A5-A7	PC	Pvalb	GSM5421889				18938	J1	V1C	OC	Sst	GSM6708988
	26146	L1	LEC	TC	Pvalb	GSM6810938				15811	I1	LEC	TC	Pvalb	GSM6786260				12848	G4	LEC	TC	Pvalb	GSM7317915
	27111	L1	LEC	TC	Pvalb	GSM6812025				19864	K1	M1C	FC	Sst	GSM6772132				16079	H4	A46	FC	Lamp5	GSM7327480
	24075	K1	FI	FC	Pvalb	GSM6838640				21474	L1	M1C	FC	Sst	GSM6780079				15918	H4	A46	FC	Sst	GSM7326424
	25015	K1	FI	FC	Pvalb	GSM6839653				20162	K1	M1C	FC	Vip	GSM6772513				15966	H4	A46	FC	Lamp5	GSM7326659
	8196	D3	A46	FC	Pvalb	GSM6789851				16113	I1	LEC	TC	Vip	GSM6786651				15991	H4	A46	FC	Pvalb	GSM7326944
	27268	L1	LEC	TC	Pvalb	GSM6812198				20316	K1	M1C	FC	Lamp5	GSM6772771				15989	H4	A46	FC	Pvalb	GSM7326932
	24802	K1	FI	FC	Pvalb	GSM6839416				6323	D2	A46	FC	Lamp5	GSM6794191				15969	H4	A46	FC	Pvalb	GSM7326671
	26124	L1	LEC	TC	Pvalb	GSM6810913				115	A1	A5-A7	PC	Lamp5	GSM5422282				15768	H4	A46	FC	Vip	GSM7325507
	8164	D3	A46	FC	Pvalb	GSM6789874				20089	K1	M1C	FC	Sst	GSM6772429				12939	G4	LEC	TC	Vip	GSM7318286
	23169	K1	FI	FC	Pvalb	GSM6837654				20208	K1	M1C	FC	Sst	GSM6772579				13105	G4	LEC	TC	Vip	GSM7319334
	23879	K1	FI	FC	Pvalb	GSM6838435				21351	L1	M1C	FC	Sst	GSM6779582				15800	H4	A46	FC	Lamp5	GSM7325701
	27367	L1	LEC	TC	Pvalb	GSM6812309				6340	D2	A46	FC	Vip	GSM6794466				13003	G4	LEC	TC	Sst	GSM7318682
	23432	K1	FI	FC	Pvalb	GSM6837945				12271	G1	V1C	OC	Vip	GSM6747978				12927	G4	LEC	TC	Vip	GSM7318243
	23949	K1	FI	FC	Pvalb	GSM6838510				11749	F4	CA1R-CA2R-CA3R	HIP	Lamp5	GSM5869399				13037	G4	LEC	TC	Vip	GSM7318804
	25258	K1	FI	FC	Pvalb	GSM6839909				21	A1	A5-A7	PC	Pvalb	GSM5421759				15653	H3	A24	FC	Sst	GSM7339424
	23489	K1	FI	FC	Pvalb	GSM6838007				16160	I1	LEC	TC	Sncg	GSM6786708				18855	J1	V1C	OC	Vip	GSM6708095
	24931	K1	FI	FC	Pvalb	GSM6839557				12288	G1	V1C	OC	Lamp5	GSM6748170				18840	J1	V1C	OC	Pvalb	GSM6707946
	8171	D3	A46	FC	Pvalb	GSM6791911				20168	K1	M1C	FC	Pvalb	GSM6772525				16177	H4	A46	FC	Pvalb	GSM7328123
	24920	K1	FI	FC	Pvalb	GSM6839545				21701	L1	M1C	FC	Pvalb	GSM6780993				12979	G4	LEC	TC	Pvalb	GSM7318526
	25640	L1	LEC	TC	Pvalb	GSM6810364				11733	F4	CA1R-CA2R-CA3R	HIP	Pvalb	GSM5868188				20817	J2	A24	FC	Lamp5	GSM6362416
	25382	L1	LEC	TC	Pvalb	GSM6810083				12269	G1	V1C	OC	Pvalb	GSM6747969				13187	G4	LEC	TC	Pvalb	GSM7319882
	24125	K1	FI	FC	Pvalb	GSM6838694				45	A1	A5-A7	PC	Pvalb	GSM5421950				15968	H4	A46	FC	Sst	GSM7326662
	23595	K1	FI	FC	Pvalb	GSM6838123				20098	K1	M1C	FC	Sst	GSM6772441				15877	H4	A46	FC	Vip	GSM7326183
	8941	D4	MTG	TC	Pvalb	GSM6798884				9481	E4	MTG	TC	Vip	GSM5162135				13162	G4	LEC	TC	Sst	GSM7319717
	8167	D3	A46	FC	Pvalb	GSM6790358				9409	E4	MTG	TC	Lamp5	GSM5161265				13091	G4	LEC	TC	Sncg	GSM7319291
	25445	L1	LEC	TC	Pvalb	GSM6810153				19396	J3	A24	FC	Sst	GSM6874139				16054	H4	A46	FC	Pvalb	GSM7327384
	24233	K1	FI	FC	Pvalb	GSM6838806				6374	D2	A46	FC	Vip	GSM6795115				12341	G2	M1C	FC	Sst	GSM6315470
	23613	K1	FI	FC	Pvalb	GSM6838145				25	A1	A5-A7	PC	Pvalb	GSM5421797				15654	H3	A24	FC	Pvalb	GSM7339426
	8947	D4	MTG	TC	Pvalb	GSM6799836				12191	G1	V1C	OC	Sst	GSM6746721				57	A1	MTG	TC	Vip	GSM6334480
	25210	K1	FI	FC	Pvalb	GSM6839859				21437	L1	M1C	FC	Lamp5	GSM6779938				15763	H4	A46	FC	Lamp5	GSM7325487
	22324	J1	V1C	OC	Pvalb	GSM6742461				15828	I1	LEC	TC	Pvalb	GSM6786280				18290	I3	MTG	TC	Pvalb	GSM7344011
	8939	D4	MTG	TC	Pvalb	GSM6798574				16053	I1	LEC	TC	Pvalb	GSM6786580				18222	I3	MTG	TC	Sst	GSM7343313
	27490	L1	LEC	TC	Pvalb	GSM6812462				16747	I1	LEC	TC	Vip	GSM6787514				18406	I3	MTG	TC	Vip	GSM7345566
	8183	D3	A46	FC	Pvalb	GSM6789091				12259	G1	V1C	OC	Lamp5	GSM6747891				15801	H4	A46	FC	Lamp5	GSM7325708
	26038	L1	LEC	TC	Pvalb	GSM6810815				90	A1	A5-A7	PC	Pvalb	GSM5422156				16026	H4	A46	FC	Sst	GSM7327246
	26492	L1	LEC	TC	Pvalb	GSM6811337				6437	D2	A46	FC	Sst	GSM6796360				15958	H4	A46	FC	Sst	GSM7326626
	26968	L1	LEC	TC	Pvalb	GSM6811871				12231	G1	V1C	OC	Vip	GSM6747515				12895	G4	LEC	TC	Vip	GSM7318144
	24859	K1	FI	FC	Pvalb	GSM6839475				19924	K1	M1C	FC	Lamp5	GSM6772205				15848	H4	A46	FC	Sst	GSM7325991
	8943	D4	MTG	TC	Pvalb	GSM6799569				11739	F4	CA1R-CA2R-CA3R	HIP	Lamp5	GSM5868318				18432	I3	MTG	TC	Pvalb	GSM7345892
	8129	D3	A46	FC	Pvalb	GSM6789605				20894	K1	M1C	FC	Sncg	GSM6773571				18866	J1	V1C	OC	Pvalb	GSM6708235
	8132	D3	A46	FC	Pvalb	GSM6790354				19955	K1	M1C	FC	Vip	GSM6772242				15678	H3	A24	FC	Sst	GSM7340181
	19905	J1	V1C	OC	Pvalb	GSM6739657				12252	G1	V1C	OC	Pvalb	GSM6747747				15746	H4	A46	FC	Lamp5	GSM7325374
	8131	D3	A46	FC	Pvalb	GSM6790192				16961	I1	LEC	TC	Lamp5	GSM6787789				16088	H4	A46	FC	Lamp5	GSM7327533
	8151	D3	A46	FC	Pvalb	GSM6791832				6349	D2	A46	FC	Pvalb	GSM6794594				13270	G4	LEC	TC	Lamp5	GSM7320362
	27323	L1	LEC	TC	Pvalb	GSM6812260				20149	K1	M1C	FC	Vip	GSM6772500				18281	I3	MTG	TC	Pvalb	GSM7343913
	8185	D3	A46	FC	Pvalb	GSM6789206				8857	E3	DGR-CA4Rpy	HIP	Vip	GSM5865957				15933	H4	A46	FC	Lamp5	GSM7326478
	8198	D3	A46	FC	Pvalb	GSM6789185				19771	K1	M1C	FC	Lamp5	GSM6772006				15934	H4	A46	FC	Sst	GSM7326481
	19914	J1	V1C	OC	Pvalb	GSM6739666				56	A1	A5-A7	PC	Lamp5	GSM5422049				16157	H4	A46	FC	Sst	GSM7328005
	26098	L1	LEC	TC	Pvalb	GSM6810880				6321	D2	A46	FC	Pvalb	GSM6794139				12993	G4	LEC	TC	Pvalb	GSM7318631
	8169	D3	A46	FC	Pvalb	GSM6790690				6325	D2	A46	FC	Sst	GSM6794200				8299	E1	A19	OC	Sst	GSM6333031
	8174	D3	A46	FC	Pvalb	GSM6791503				21041	K1	M1C	FC	Sst	GSM6773776				13106	G4	LEC	TC	Lamp5	GSM7319338
	4092	C1	A5	PC	Pvalb	GSM5409571				12234	G1	V1C	OC	Sst	GSM6747555				15981	H4	A46	FC	Vip	GSM7326797
	8175	D3	A46	FC	Pvalb	GSM6791518				6456	D2	A46	FC	Vip	GSM6796624				15886	H4	A46	FC	Pvalb	GSM7326222
	27639	L1	LEC	TC	Pvalb	GSM6812625				19706	K1	M1C	FC	Vip	GSM6771923				15884	H4	A46	FC	Sst	GSM7326205
	27066	L1	LEC	TC	Pvalb	GSM6811976				15773	I1	LEC	TC	Vip	GSM6786214				13299	G4	LEC	TC	Sncg	GSM7320552
	27934	L1	LEC	TC	Pvalb	GSM6812961				6402	D2	A46	FC	Pvalb	GSM6795694				13310	G4	LEC	TC	Pvalb	GSM7320662
	23742	K1	FI	FC	Pvalb	GSM6838284				6386	D2	A46	FC	Sst	GSM6795392				18245	I3	MTG	TC	Sst	GSM7343528
	8168	D3	A46	FC	Pvalb	GSM6790478				111	A1	A5-A7	PC	Sst	GSM5422278				18274	I3	MTG	TC	Sncg	GSM7343799
	8195	D3	A46	FC	Pvalb	GSM6789451				6352	D2	A46	FC	Pvalb	GSM6794661				18232	I3	MTG	TC	Sst	GSM7343443
	8934	D4	MTG	TC	Pvalb	GSM6799810				15864	I1	LEC	TC	Pvalb	GSM6786319				12896	G4	LEC	TC	Pvalb	GSM7318145
	8161	D3	A46	FC	Pvalb	GSM6789436				16067	I1	LEC	TC	Pvalb	GSM6786597				12850	G4	LEC	TC	Vip	GSM7317921
	23630	K1	FI	FC	Pvalb	GSM6838163				6433	D2	A46	FC	Pvalb	GSM6796266				18255	I3	MTG	TC	Sst	GSM7343599
	24798	K1	FI	FC	Pvalb	GSM6839412				6308	D2	A46	FC	Sst	GSM6793900				15900	H4	A46	FC	Sst	GSM7326295
	21308	J1	V1C	OC	Pvalb	GSM6741244				20650	K1	M1C	FC	Pvalb	GSM6773235				13159	G4	LEC	TC	Pvalb	GSM7319705
	24877	K1	FI	FC	Pvalb	GSM6839495				15728	I1	LEC	TC	Pvalb	GSM6786161				15876	H4	A46	FC	Pvalb	GSM7326182
	25123	K1	FI	FC	Pvalb	GSM6839768				9418	E4	MTG	TC	Sncg	GSM5161310				15795	H4	A46	FC	Vip	GSM7325680
	27317	L1	LEC	TC	Pvalb	GSM6812254				2995	B4	V1C	OC	Sst	GSM7145304				16185	H4	A46	FC	Sst	GSM7328172
	24251	K1	FI	FC	Pvalb	GSM6838825				21596	L1	M1C	FC	Vip	GSM6780513				15879	H4	A46	FC	Sst	GSM7326186
	27475	L1	LEC	TC	Pvalb	GSM6812446				16060	I1	LEC	TC	Lamp5	GSM6786590				18356	I3	MTG	TC	Sst	GSM7344855
	25487	L1	LEC	TC	Pvalb	GSM6810198				21408	L1	M1C	FC	Sst	GSM6779819				18261	I3	MTG	TC	Sst	GSM7343663
	8165	D3	A46	FC	Pvalb	GSM6789938				9544	E4	MTG	TC	Sst	GSM5163160				18451	I3	MTG	TC	Pvalb	GSM7346110
	23521	K1	FI	FC	Pvalb	GSM6838041				17	A1	A5-A7	PC	Vip	GSM5421727				15773	H4	A46	FC	Vip	GSM7325555
	20192	J1	V1C	OC	Pvalb	GSM6739980				21111	K1	M1C	FC	Pvalb	GSM6773875				13305	G4	LEC	TC	Sst	GSM7320646
	20557	J1	V1C	OC	Pvalb	GSM6740388				21507	L1	M1C	FC	Sst	GSM6780186				12814	G4	LEC	TC	Vip	GSM7317790
	25615	L1	LEC	TC	Pvalb	GSM6810337				12236	G1	V1C	OC	Pvalb	GSM6747586				15624	H3	A24	FC	Sncg	GSM7338062
	27581	L1	LEC	TC	Pvalb	GSM6812560				12189	G1	V1C	OC	Vip	GSM6746709				12855	G4	LEC	TC	Vip	GSM7317937
	8134	D3	A46	FC	Pvalb	GSM6790770				6301	D2	A46	FC	Lamp5	GSM6793787				16023	H4	A46	FC	Lamp5	GSM7327222
	8179	D3	A46	FC	Pvalb	GSM6789872				20679	K1	M1C	FC	Sst	GSM6773272				18414	I3	MTG	TC	Vip	GSM7345659
	23585	K1	FI	FC	Pvalb	GSM6838112				6	A1	A5-A7	PC	Vip	GSM5421660				16052	H4	A46	FC	Lamp5	GSM7327370
	8139	D3	A46	FC	Pvalb	GSM6791923				19	A1	A5-A7	PC	Pvalb	GSM5421736				2503	B2	A44-A45	FC	Vip	GSM6405224
	8927	D4	MTG	TC	Pvalb	GSM6800302				19734	K1	M1C	FC	Sncg	GSM6771958				2517	B2	A44-A45	FC	Sst	GSM6406036
	24141	K1	FI	FC	Pvalb	GSM6838710				16124	I1	LEC	TC	Sncg	GSM6786665				15755	H4	A46	FC	Pvalb	GSM7325443
	24490	K1	FI	FC	Pvalb	GSM6839085				21592	L1	M1C	FC	Vip	GSM6780505				16081	H4	A46	FC	Pvalb	GSM7327483
	8951	D4	MTG	TC	Pvalb	GSM6800222				12169	G1	V1C	OC	Vip	GSM6746332				12978	G4	LEC	TC	Sncg	GSM7318524
	8172	D3	A46	FC	Pvalb	GSM6791985				4415	C2	A44-A45	FC	Lamp5	GSM7302973				4051	C1	DGR	HIP	Vip	GSM6564101
	24011	K1	FI	FC	Pvalb	GSM6838575				6311	D2	A46	FC	Pvalb	GSM6794035				15782	H4	A46	FC	Vip	GSM7325600
	8135	D3	A46	FC	Pvalb	GSM6790775				15980	I1	LEC	TC	Sst	GSM6786478				598	A2	A5-A7	PC	Sst	GSM6354146
	8149	D3	A46	FC	Pvalb	GSM6791547				9428	E4	MTG	TC	Sst	GSM5161373				18355	I3	MTG	TC	Pvalb	GSM7344846
	8188	D3	A46	FC	Pvalb	GSM6790208				16	A1	A5-A7	PC	Vip	GSM5421722				18856	J1	V1C	OC	Vip	GSM6708098
	23702	K1	FI	FC	Pvalb	GSM6838243				9359	E4	MTG	TC	Vip	GSM5160694				16111	H4	A46	FC	Pvalb	GSM7327674
	24159	K1	FI	FC	Pvalb	GSM6838729				16726	I1	LEC	TC	Vip	GSM6787485				18753	J1	V1C	OC	Sst	GSM6707062
	16440	H3	A24	FC	Pvalb	GSM6869739				6385	D2	A46	FC	Sst	GSM6795366				13096	G4	LEC	TC	Lamp5	GSM7319306
	25639	L1	LEC	TC	Pvalb	GSM6810363				63	A1	A5-A7	PC	Vip	GSM5422080				15906	H4	A46	FC	Vip	GSM7326316
	27400	L1	LEC	TC	Pvalb	GSM6812346				16917	I1	LEC	TC	Lamp5	GSM6787736				18220	I3	MTG	TC	Sst	GSM7343290
	27427	L1	LEC	TC	Pvalb	GSM6812390				17078	I1	LEC	TC	Lamp5	GSM6787919				18886	J1	V1C	OC	Sst	GSM6708444
	20496	J1	V1C	OC	Pvalb	GSM6740325				9377	E4	MTG	TC	Sst	GSM5160985				18303	I3	MTG	TC	Sst	GSM7344218
	8143	D3	A46	FC	Pvalb	GSM6789314				9365	E4	MTG	TC	Vip	GSM5160834				12395	G2	M1C	FC	Sst	GSM6316561
	23720	K1	FI	FC	Pvalb	GSM6838262				9410	E4	MTG	TC	Pvalb	GSM5161266				16169	H4	A46	FC	Vip	GSM7328079
	24599	K1	FI	FC	Pvalb	GSM6839205				16191	I1	LEC	TC	Sncg	GSM6786751				18272	I3	MTG	TC	Sncg	GSM7343784
	23220	K1	FI	FC	Pvalb	GSM6837710				20109	K1	M1C	FC	Sst	GSM6772453				15610	H3	A24	FC	Lamp5	GSM7337557
	25556	L1	LEC	TC	Pvalb	GSM6810273				9331	E4	MTG	TC	Sst	GSM5160219				15784	H4	A46	FC	Vip	GSM7325608
	21243	J1	V1C	OC	Pvalb	GSM6741173				20339	K1	M1C	FC	Pvalb	GSM6772803				12877	G4	LEC	TC	Sncg	GSM7318042
	22282	J1	V1C	OC	Pvalb	GSM6742416				21436	L1	M1C	FC	Pvalb	GSM6779936				12945	G4	LEC	TC	Sncg	GSM7318313
	8940	D4	MTG	TC	Pvalb	GSM6798850				12270	G1	V1C	OC	Pvalb	GSM6747975				15781	H4	A46	FC	Sst	GSM7325595
	25630	L1	LEC	TC	Pvalb	GSM6810353				16934	I1	LEC	TC	Pvalb	GSM6787753				15629	H3	A24	FC	Vip	GSM7338273
	24700	K1	FI	FC	Pvalb	GSM6839310				11689	F4	CA1R-CA2R-CA3R	HIP	Sncg	GSM5867664				15757	H4	A46	FC	Pvalb	GSM7325448
	1209	A3	CA1C	HIP	Pvalb	GSM6157680				16322	I1	LEC	TC	Lamp5	GSM6786928				16080	H4	A46	FC	Pvalb	GSM7327482
	21940	J1	V1C	OC	Pvalb	GSM6741981				78	A1	A5-A7	PC	Sst	GSM5422124				15905	H4	A46	FC	Sst	GSM7326314
	8170	D3	A46	FC	Pvalb	GSM6791863				16968	I1	LEC	TC	Lamp5	GSM6787796				12841	G4	LEC	TC	Vip	GSM7317891
	23408	K1	FI	FC	Pvalb	GSM6837920				16504	I1	LEC	TC	Pvalb	GSM6787213				13248	G4	LEC	TC	Vip	GSM7320171
	25480	L1	LEC	TC	Pvalb	GSM6810190				12221	G1	V1C	OC	Sncg	GSM6747239				20835	J2	A24	FC	Sncg	GSM6362784
	23278	K1	FI	FC	Pvalb	GSM6837774				20169	K1	M1C	FC	Vip	GSM6772526				13165	G4	LEC	TC	Lamp5	GSM7319725
	23692	K1	FI	FC	Pvalb	GSM6838230				16675	I1	LEC	TC	Vip	GSM6787428				18311	I3	MTG	TC	Vip	GSM7344320
	8930	D4	MTG	TC	Pvalb	GSM6798939				6443	D2	A46	FC	Lamp5	GSM6796418				18437	I3	MTG	TC	Vip	GSM7345959
	26181	L1	LEC	TC	Pvalb	GSM6810986				12254	G1	V1C	OC	Lamp5	GSM6747770				15676	H3	A24	FC	Pvalb	GSM7340059
	8187	D3	A46	FC	Pvalb	GSM6790044				17009	I1	LEC	TC	Lamp5	GSM6787843				13072	G4	LEC	TC	Lamp5	GSM7319088
	23185	K1	FI	FC	Pvalb	GSM6837671				6397	D2	A46	FC	Sst	GSM6795528				13092	G4	LEC	TC	Pvalb	GSM7319292
	8954	D4	MTG	TC	Pvalb	GSM6798345				6449	D2	A46	FC	Vip	GSM6796554				18804	J1	V1C	OC	Lamp5	GSM6707517
	27164	L1	LEC	TC	Pvalb	GSM6812086				19458	J3	A24	FC	Vip	GSM6875176				18944	J1	V1C	OC	Sst	GSM6709064
	27424	L1	LEC	TC	Pvalb	GSM6812386				19990	K1	M1C	FC	Pvalb	GSM6772303				18260	I3	MTG	TC	Sst	GSM7343647
	25433	L1	LEC	TC	Pvalb	GSM6810141				6282	D2	A46	FC	Sst	GSM6793627				15617	H3	A24	FC	Vip	GSM7337748
	8942	D4	MTG	TC	Pvalb	GSM6799163				12287	G1	V1C	OC	Sst	GSM6748166				18425	I3	MTG	TC	Sst	GSM7345792
	27481	L1	LEC	TC	Pvalb	GSM6812452				20029	K1	M1C	FC	Lamp5	GSM6772349				1704	A4	A46	FC	Lamp5	GSM6376443
	27716	L1	LEC	TC	Pvalb	GSM6812709				6299	D2	A46	FC	Pvalb	GSM6793772				15851	H4	A46	FC	Sst	GSM7326005
	24776	K1	FI	FC	Pvalb	GSM6839389				6366	D2	A46	FC	Pvalb	GSM6794962				15932	H4	A46	FC	Lamp5	GSM7326477
	24151	K1	FI	FC	Pvalb	GSM6838721				21043	K1	M1C	FC	Sst	GSM6773779				13347	G4	LEC	TC	Vip	GSM7320892
	17031	H4	LEC	TC	Pvalb	GSM7149791				21469	L1	M1C	FC	Vip	GSM6780058				16047	H4	A46	FC	Sst	GSM7327340
	27464	L1	LEC	TC	Pvalb	GSM6812432				16043	I1	LEC	TC	Vip	GSM6786568				15650	H3	A24	FC	Vip	GSM7339225
	25890	L1	LEC	TC	Pvalb	GSM6810649				12185	G1	V1C	OC	Lamp5	GSM6746694				15750	H4	A46	FC	Pvalb	GSM7325415
	27123	L1	LEC	TC	Pvalb	GSM6812040				12204	G1	V1C	OC	Pvalb	GSM6746933				15769	H4	A46	FC	Sst	GSM7325515
	25224	K1	FI	FC	Pvalb	GSM6839874				21261	K1	M1C	FC	Sst	GSM6774114				15967	H4	A46	FC	Sst	GSM7326660
	20370	J1	V1C	OC	Pvalb	GSM6740185				9543	E4	MTG	TC	Sst	GSM5163153				18378	I3	MTG	TC	Vip	GSM7345093
	16963	H4	LEC	TC	Pvalb	GSM7149453				19508	J3	A24	FC	Lamp5	GSM6875992				16069	H4	A46	FC	Pvalb	GSM7327429
	27880	L1	LEC	TC	Pvalb	GSM6812901				12201	G1	V1C	OC	Lamp5	GSM6746858				18441	I3	MTG	TC	Sst	GSM7345982
	12342	F2	V1C	OC	Pvalb	GSM7190503				12248	G1	V1C	OC	Pvalb	GSM6747700				12394	G2	M1C	FC	Sst	GSM6316449
	27776	L1	LEC	TC	Pvalb	GSM6812787				17111	I1	LEC	TC	Pvalb	GSM6787959				18895	J1	V1C	OC	Pvalb	GSM6708481
	8190	D3	A46	FC	Pvalb	GSM6790835				6421	D2	A46	FC	Vip	GSM6796158				15875	H4	A46	FC	Pvalb	GSM7326168
	22944	K1	FI	FC	Pvalb	GSM6837415				12292	G1	V1C	OC	Vip	GSM6748190				12897	G4	LEC	TC	Vip	GSM7318149
	22953	K1	FI	FC	Pvalb	GSM6837425				16976	I1	LEC	TC	Vip	GSM6787805				15928	H4	A46	FC	Vip	GSM7326467
	8926	D4	MTG	TC	Pvalb	GSM6799606				9505	E4	MTG	TC	Lamp5	GSM5162450				18316	I3	MTG	TC	Lamp5	GSM7344389
	25366	L1	LEC	TC	Pvalb	GSM6810066				6422	D2	A46	FC	Pvalb	GSM6796163				20840	J2	A24	FC	Lamp5	GSM6363174
	8194	D3	A46	FC	Pvalb	GSM6791899				12228	G1	V1C	OC	Pvalb	GSM6747481				16140	H4	A46	FC	Vip	GSM7327873
	24107	K1	FI	FC	Pvalb	GSM6838675				22	A1	A5-A7	PC	Pvalb	GSM5421768				15865	H4	A46	FC	Sst	GSM7326096
	24364	K1	FI	FC	Pvalb	GSM6838946				16280	I1	LEC	TC	Sncg	GSM6786875				18392	I3	MTG	TC	Sncg	GSM7345330
	24092	K1	FI	FC	Pvalb	GSM6838659				51	A1	A5-A7	PC	Sst	GSM5422023				16149	H4	A46	FC	Pvalb	GSM7327967
	8928	D4	MTG	TC	Pvalb	GSM6798815				12170	G1	V1C	OC	Vip	GSM6746395				15921	H4	A46	FC	Vip	GSM7326433
	26135	L1	LEC	TC	Pvalb	GSM6810926				19169	J2	M1C	FC	Lamp5	GSM5154122				13030	G4	LEC	TC	Lamp5	GSM7318787
	8173	D3	A46	FC	Pvalb	GSM6790380				6315	D2	A46	FC	Sst	GSM6794084				13071	G4	LEC	TC	Sncg	GSM7319080
	25568	L1	LEC	TC	Pvalb	GSM6810287				16784	I1	LEC	TC	Vip	GSM6787560				16034	H4	A46	FC	Sst	GSM7327295
	27754	L1	LEC	TC	Pvalb	GSM6812759				21683	L1	M1C	FC	Lamp5	GSM6780932				15762	H4	A46	FC	Sst	GSM7325482
	27084	L1	LEC	TC	Pvalb	GSM6811995				21492	L1	M1C	FC	Sncg	GSM6780147				16099	H4	A46	FC	Sst	GSM7327595
	23695	K1	FI	FC	Pvalb	GSM6838235				16716	I1	LEC	TC	Sncg	GSM6787474				12905	G4	LEC	TC	Sncg	GSM7318165
	8955	D4	MTG	TC	Pvalb	GSM6798726				20066	K1	M1C	FC	Sst	GSM6772398				12973	G4	LEC	TC	Vip	GSM7318486
	21934	J1	V1C	OC	Pvalb	GSM6741974				46	A1	A5-A7	PC	Sst	GSM5421952				15992	H4	A46	FC	Pvalb	GSM7326947
	8958	D4	MTG	TC	Pvalb	GSM6799799				12182	G1	V1C	OC	Pvalb	GSM6746687				18865	J1	V1C	OC	Sst	GSM6708223
	27460	L1	LEC	TC	Pvalb	GSM6812428				16040	I1	LEC	TC	Sst	GSM6786564				15869	H4	A46	FC	Pvalb	GSM7326120
	27865	L1	LEC	TC	Pvalb	GSM6812884				12179	G1	V1C	OC	Sncg	GSM6746623				13316	G4	LEC	TC	Vip	GSM7320690
	20329	J1	V1C	OC	Pvalb	GSM6740138				9535	E4	MTG	TC	Sncg	GSM5163001				16122	H4	A46	FC	Lamp5	GSM7327721
	23138	K1	FI	FC	Pvalb	GSM6837621				12226	G1	V1C	OC	Sst	GSM6747468				18969	J1	V1C	OC	Vip	GSM6709228
	5086	C2	ITG	TC	Pvalb	GSM6146306				9361	E4	MTG	TC	Sst	GSM5160750				8278	E1	A19	OC	Sst	GSM6332349
	26284	L1	LEC	TC	Pvalb	GSM6811108				20785	K1	M1C	FC	Vip	GSM6773418				18374	I3	MTG	TC	Pvalb	GSM7345032
	25927	L1	LEC	TC	Pvalb	GSM6810691				12282	G1	V1C	OC	Vip	GSM6748132				15659	H3	A24	FC	Sst	GSM7339638
	8147	D3	A46	FC	Pvalb	GSM6790246				14038	H2	S1C	PC	Pvalb	GSM5457423				15665	H3	A24	FC	Sst	GSM7339773
	8197	D3	A46	FC	Pvalb	GSM6790081				16806	I1	LEC	TC	Pvalb	GSM6787589				12991	G4	LEC	TC	Sst	GSM7318616
	20902	J1	V1C	OC	Pvalb	GSM6740786				9407	E4	MTG	TC	Sst	GSM5161250				12876	G4	LEC	TC	Lamp5	GSM7318041
	27645	L1	LEC	TC	Pvalb	GSM6812631				12200	G1	V1C	OC	Vip	GSM6746832				12816	G4	LEC	TC	Sst	GSM7317796
	26085	L1	LEC	TC	Pvalb	GSM6810866				12233	G1	V1C	OC	Lamp5	GSM6747537				13144	G4	LEC	TC	Sncg	GSM7319647
	23795	K1	FI	FC	Pvalb	GSM6838341				19871	K1	M1C	FC	Sst	GSM6772140				12887	G4	LEC	TC	Vip	GSM7318105
	23783	K1	FI	FC	Pvalb	GSM6838328				6357	D2	A46	FC	Pvalb	GSM6794892				12880	G4	LEC	TC	Sncg	GSM7318048
	24196	K1	FI	FC	Pvalb	GSM6838769				6381	D2	A46	FC	Sst	GSM6795248				19004	J1	V1C	OC	Sst	GSM6709616
	27270	L1	LEC	TC	Pvalb	GSM6812201				19482	J3	A24	FC	Vip	GSM6875586				12971	G4	LEC	TC	Vip	GSM7318459
	23465	K1	FI	FC	Pvalb	GSM6837982				12180	G1	V1C	OC	Vip	GSM6746624				12871	G4	LEC	TC	Vip	GSM7318021
	25162	K1	FI	FC	Pvalb	GSM6839809				16390	I1	LEC	TC	Lamp5	GSM6787009				141	A1	MTG	TC	Sst	GSM6336208
	8177	D3	A46	FC	Pvalb	GSM6789612				19672	K1	M1C	FC	Pvalb	GSM6771877				13204	G4	LEC	TC	Vip	GSM7319996
	25767	L1	LEC	TC	Pvalb	GSM6810504				21763	L1	M1C	FC	Pvalb	GSM6781343				20836	J2	A24	FC	Sst	GSM6362919
	26058	L1	LEC	TC	Pvalb	GSM6810838				12211	G1	V1C	OC	Pvalb	GSM6747081				15878	H4	A46	FC	Sst	GSM7326185
	8936	D4	MTG	TC	Pvalb	GSM6800349				20468	K1	M1C	FC	Sst	GSM6772998				18426	I3	MTG	TC	Vip	GSM7345797
	8961	D4	MTG	TC	Pvalb	GSM6800891				9553	E4	MTG	TC	Vip	GSM5163219				16116	H4	A46	FC	Sncg	GSM7327701
	27806	L1	LEC	TC	Pvalb	GSM6812820				9372	E4	MTG	TC	Pvalb	GSM5160904				13158	G4	LEC	TC	Pvalb	GSM7319701
	17505	H4	LEC	TC	Pvalb	GSM7150524				21283	L1	M1C	FC	Vip	GSM6779333				15856	H4	A46	FC	Lamp5	GSM7326054
	8144	D3	A46	FC	Pvalb	GSM6789699				12257	G1	V1C	OC	Vip	GSM6747837				16087	H4	A46	FC	Pvalb	GSM7327527
	8148	D3	A46	FC	Pvalb	GSM6790651				81	A1	A5-A7	PC	Vip	GSM5422132				15745	H4	A46	FC	Vip	GSM7325358
	24842	K1	FI	FC	Pvalb	GSM6839458				15861	I1	LEC	TC	Vip	GSM6786316				13348	G4	LEC	TC	Vip	GSM7320895
	26086	L1	LEC	TC	Pvalb	GSM6810867				6334	D2	A46	FC	Lamp5	GSM6794375				2912	B3	DGC	HIP	Lamp5	GSM6525626
	8158	D3	A46	FC	Pvalb	GSM6789245				20516	K1	M1C	FC	Pvalb	GSM6773053				18973	J1	V1C	OC	Sncg	GSM6709282
	24881	K1	FI	FC	Pvalb	GSM6839499				17061	I1	LEC	TC	Pvalb	GSM6787899				18379	I3	MTG	TC	Sncg	GSM7345102
	8128	D3	A46	FC	Pvalb	GSM6789431				21336	L1	M1C	FC	Sncg	GSM6779535				15870	H4	A46	FC	Vip	GSM7326125
	24052	K1	FI	FC	Pvalb	GSM6838617				6291	D2	A46	FC	Vip	GSM6793739				22117	K1	CA1C	HIP	Pvalb	GSM6521134
	8160	D3	A46	FC	Pvalb	GSM6789302				6407	D2	A46	FC	Pvalb	GSM6795848				15917	H4	A46	FC	Lamp5	GSM7326419
	4061	C1	A5	PC	Pvalb	GSM5408159				20090	K1	M1C	FC	Pvalb	GSM6772430				18333	I3	MTG	TC	Pvalb	GSM7344590
	8163	D3	A46	FC	Pvalb	GSM6789648				20011	K1	M1C	FC	Pvalb	GSM6772330				18396	I3	MTG	TC	Vip	GSM7345424
	21991	J1	V1C	OC	Pvalb	GSM6742036				15989	I1	LEC	TC	Sncg	GSM6786487				16132	H4	A46	FC	Sst	GSM7327792
	8935	D4	MTG	TC	Pvalb	GSM6800340				20141	K1	M1C	FC	Vip	GSM6772492				20878	J2	A24	FC	Sncg	GSM6363587
	8138	D3	A46	FC	Pvalb	GSM6791819				28	A1	A5-A7	PC	Vip	GSM5421820				15957	H4	A46	FC	Pvalb	GSM7326613
	24464	K1	FI	FC	Pvalb	GSM6839055				12265	G1	V1C	OC	Lamp5	GSM6747943				20848	J2	A24	FC	Sst	GSM6363265
	24704	K1	FI	FC	Pvalb	GSM6839314				9419	E4	MTG	TC	Lamp5	GSM5161311				18873	J1	V1C	OC	Lamp5	GSM6708324
	14657	H1	Pro	OC	Pvalb	GSM5441962				20537	K1	M1C	FC	Pvalb	GSM6773078				15761	H4	A46	FC	Vip	GSM7325481
	27336	L1	LEC	TC	Pvalb	GSM6812276				12174	G1	V1C	OC	Pvalb	GSM6746587				16050	H4	A46	FC	Pvalb	GSM7327358
	4094	C1	A5	PC	Pvalb	GSM5409684				6379	D2	A46	FC	Sst	GSM6795236				18914	J1	V1C	OC	Lamp5	GSM6708727
	25053	K1	FI	FC	Pvalb	GSM6839692				19728	K1	M1C	FC	Pvalb	GSM6771948				16128	H4	A46	FC	Sst	GSM7327766
	8950	D4	MTG	TC	Pvalb	GSM6800212				16972	I1	LEC	TC	Pvalb	GSM6787801				18970	J1	V1C	OC	Vip	GSM6709233
	4083	C1	A5	PC	Pvalb	GSM5408973				6294	D2	A46	FC	Lamp5	GSM6793753				13251	G4	LEC	TC	Sst	GSM7320196
	26158	L1	LEC	TC	Pvalb	GSM6810952				19457	J3	A24	FC	Lamp5	GSM6875167				18398	I3	MTG	TC	Vip	GSM7345476
	19743	J1	V1C	OC	Pvalb	GSM6739481				37	A1	A5-A7	PC	Lamp5	GSM5421901				18390	I3	MTG	TC	Sncg	GSM7345289
	19844	J1	V1C	OC	Pvalb	GSM6739590				6401	D2	A46	FC	Pvalb	GSM6795640				15872	H4	A46	FC	Vip	GSM7326144
	23211	K1	FI	FC	Pvalb	GSM6837700				15968	I1	LEC	TC	Pvalb	GSM6786462				15887	H4	A46	FC	Pvalb	GSM7326223
	23789	K1	FI	FC	Pvalb	GSM6838334				16511	I1	LEC	TC	Pvalb	GSM6787221				13086	G4	LEC	TC	Vip	GSM7319240
	24279	K1	FI	FC	Pvalb	GSM6838857				6332	D2	A46	FC	Sst	GSM6794336				12666	G3	V2	OC	Sncg	GSM6325138
	24955	K1	FI	FC	Pvalb	GSM6839589				6411	D2	A46	FC	Sst	GSM6795898				13045	G4	LEC	TC	Pvalb	GSM7318832
	25257	K1	FI	FC	Pvalb	GSM6839908				12219	G1	V1C	OC	Sst	GSM6747189				16204	H4	A46	FC	Pvalb	GSM7328254
	26151	L1	LEC	TC	Pvalb	GSM6810943				9346	E4	MTG	TC	Sst	GSM5160520				18297	I3	MTG	TC	Pvalb	GSM7344131
	8932	D4	MTG	TC	Pvalb	GSM6799012				4307	C2	A44-A45	FC	Vip	GSM7301804				18315	I3	MTG	TC	Sst	GSM7344381
	23683	K1	FI	FC	Pvalb	GSM6838220				9448	E4	MTG	TC	Vip	GSM5161697				18907	J1	V1C	OC	Sncg	GSM6708677
	26019	L1	LEC	TC	Pvalb	GSM6810793				9467	E4	MTG	TC	Vip	GSM5161915				16039	H4	A46	FC	Vip	GSM7327314
	23052	K1	FI	FC	Pvalb	GSM6837529				16013	I1	LEC	TC	Lamp5	GSM6786519				18879	J1	V1C	OC	Vip	GSM6708380
	23932	K1	FI	FC	Pvalb	GSM6838493				20847	K1	M1C	FC	Sst	GSM6773510				13123	G4	LEC	TC	Pvalb	GSM7319423
	24469	K1	FI	FC	Pvalb	GSM6839061				6420	D2	A46	FC	Sst	GSM6796140				12852	G4	LEC	TC	Sst	GSM7317929
	21182	J1	V1C	OC	Pvalb	GSM6741109				19726	K1	M1C	FC	Sst	GSM6771946				12838	G4	LEC	TC	Lamp5	GSM7317885
	8133	D3	A46	FC	Pvalb	GSM6790655				20681	K1	M1C	FC	Vip	GSM6773275				2542	B2	A44-A45	FC	Lamp5	GSM6406138
	24363	K1	FI	FC	Pvalb	GSM6838945				9503	E4	MTG	TC	Sncg	GSM5162443				12984	G4	LEC	TC	Pvalb	GSM7318564
	26191	L1	LEC	TC	Pvalb	GSM6810998				12258	G1	V1C	OC	Sst	GSM6747872				18247	I3	MTG	TC	Vip	GSM7343534
	8184	D3	A46	FC	Pvalb	GSM6789052				20368	K1	M1C	FC	Vip	GSM6772844				18428	I3	MTG	TC	Sst	GSM7345814
	22981	K1	FI	FC	Pvalb	GSM6837454				20843	K1	M1C	FC	Pvalb	GSM6773502				13232	G4	LEC	TC	Lamp5	GSM7320109
	24439	K1	FI	FC	Pvalb	GSM6839027				30	A1	A5-A7	PC	Sst	GSM5421834				15999	H4	A46	FC	Vip	GSM7326998
	4046	C1	A5	PC	Pvalb	GSM5407337				20136	K1	M1C	FC	Vip	GSM6772487				13067	G4	LEC	TC	Vip	GSM7319049
	27437	L1	LEC	TC	Pvalb	GSM6812401				5	A1	A5-A7	PC	Vip	GSM5421643				13147	G4	LEC	TC	Lamp5	GSM7319655
	25085	K1	FI	FC	Pvalb	GSM6839728				18698	J2	M1C	FC	Sst	GSM5152544				13252	G4	LEC	TC	Pvalb	GSM7320200
	4070	C1	A5	PC	Pvalb	GSM5408308				54	A1	A5-A7	PC	Pvalb	GSM5422040				15862	H4	A46	FC	Sst	GSM7326089
	4088	C1	A5	PC	Pvalb	GSM5409052				6414	D2	A46	FC	Sncg	GSM6795926				18893	J1	V1C	OC	Pvalb	GSM6708477
	21741	J1	V1C	OC	Pvalb	GSM6741762				16597	I1	LEC	TC	Sncg	GSM6787338				2526	B2	A44-A45	FC	Sst	GSM6406061
	22954	K1	FI	FC	Pvalb	GSM6837426				12193	G1	V1C	OC	Sst	GSM6746726				16180	H4	A46	FC	Sst	GSM7328139
	4064	C1	A5	PC	Pvalb	GSM5408199				6306	D2	A46	FC	Lamp5	GSM6793839				12952	G4	LEC	TC	Sst	GSM7318361
	8957	D4	MTG	TC	Pvalb	GSM6799198				20795	K1	M1C	FC	Pvalb	GSM6773432				12948	G4	LEC	TC	Lamp5	GSM7318318
	27053	L1	LEC	TC	Pvalb	GSM6811961				12214	G1	V1C	OC	Lamp5	GSM6747113				12940	G4	LEC	TC	Pvalb	GSM7318292
	4096	C1	A5	PC	Pvalb	GSM5409735				15381	I1	LEC	TC	Lamp5	GSM6785622				16037	H4	A46	FC	Sst	GSM7327303
	20096	J1	V1C	OC	Pvalb	GSM6739877				4417	C2	A44-A45	FC	Pvalb	GSM7302981				16017	H4	A46	FC	Pvalb	GSM7327180
	20497	J1	V1C	OC	Pvalb	GSM6740326				20527	K1	M1C	FC	Sncg	GSM6773066				18948	J1	V1C	OC	Sst	GSM6709091
	8952	D4	MTG	TC	Pvalb	GSM6798830				21110	K1	M1C	FC	Sncg	GSM6773874				13116	G4	LEC	TC	Lamp5	GSM7319375
	26178	L1	LEC	TC	Pvalb	GSM6810983				16107	I1	LEC	TC	Sncg	GSM6786643				16115	H4	A46	FC	Sst	GSM7327700
	4091	C1	A5	PC	Pvalb	GSM5409140				31	A1	A5-A7	PC	Vip	GSM5421864				12861	G4	LEC	TC	Sst	GSM7317965
	8959	D4	MTG	TC	Pvalb	GSM6799925				19644	K1	M1C	FC	Pvalb	GSM6771842				13231	G4	LEC	TC	Sncg	GSM7320108
	27271	L1	LEC	TC	Pvalb	GSM6812202				21577	L1	M1C	FC	Sncg	GSM6780461				12854	G4	LEC	TC	Pvalb	GSM7317933
	8162	D3	A46	FC	Pvalb	GSM6789622				20028	K1	M1C	FC	Sst	GSM6772348				15973	H4	A46	FC	Sst	GSM7326696
	19997	J1	V1C	OC	Pvalb	GSM6739760				12247	G1	V1C	OC	Sst	GSM6747682				14479	H2	Pro	OC	Pvalb	GSM6676564
	25459	L1	LEC	TC	Pvalb	GSM6810169				85	A1	A5-A7	PC	Sst	GSM5422143				18756	J1	V1C	OC	Sncg	GSM6707093
	27036	L1	LEC	TC	Pvalb	GSM6811942				104	A1	A5-A7	PC	Sst	GSM5422255				13283	G4	LEC	TC	Lamp5	GSM7320443
	27372	L1	LEC	TC	Pvalb	GSM6812314				16049	I1	LEC	TC	Sst	GSM6786576				18755	J1	V1C	OC	Pvalb	GSM6707079
	23063	K1	FI	FC	Pvalb	GSM6837542				11701	F4	CA1R-CA2R-CA3R	HIP	Vip	GSM5867814				18438	I3	MTG	TC	Sst	GSM7345963
	25392	L1	LEC	TC	Pvalb	GSM6810094				9413	E4	MTG	TC	Vip	GSM5161283				20797	J2	A24	FC	Sst	GSM6362296
	8192	D3	A46	FC	Pvalb	GSM6791487				9516	E4	MTG	TC	Sncg	GSM5162602				16196	H4	A46	FC	Pvalb	GSM7328222
	25118	K1	FI	FC	Pvalb	GSM6839763				21766	L1	M1C	FC	Sst	GSM6781356				15954	H4	A46	FC	Sst	GSM7326594
	21063	J1	V1C	OC	Pvalb	GSM6740974				12197	G1	V1C	OC	Sst	GSM6746822				15978	H4	A46	FC	Lamp5	GSM7326774
	27904	L1	LEC	TC	Pvalb	GSM6812930				2	A1	A5-A7	PC	Sst	GSM5421548				13015	G4	LEC	TC	Pvalb	GSM7318718
	24391	K1	FI	FC	Pvalb	GSM6838975				21158	K1	M1C	FC	Lamp5	GSM6773944				18285	I3	MTG	TC	Vip	GSM7343938
	26243	L1	LEC	TC	Pvalb	GSM6811056				20619	K1	M1C	FC	Pvalb	GSM6773192				18740	J1	V1C	OC	Vip	GSM6706933
	16775	H4	LEC	TC	Pvalb	GSM7149227				15385	I1	LEC	TC	Pvalb	GSM6785626				18443	I3	MTG	TC	Sncg	GSM7345985
	27405	L1	LEC	TC	Pvalb	GSM6812366				3797	C1	FI	FC	Sncg	GSM7229188				13179	G4	LEC	TC	Sncg	GSM7319837
	27699	L1	LEC	TC	Pvalb	GSM6812689				14028	H2	S1C	PC	Sst	GSM5457387				18369	I3	MTG	TC	Pvalb	GSM7344975
	23599	K1	FI	FC	Pvalb	GSM6838127				19657	K1	M1C	FC	Vip	GSM6771855				15820	H4	A46	FC	Pvalb	GSM7325852
	23413	K1	FI	FC	Pvalb	GSM6837926				19419	J3	A24	FC	Lamp5	GSM6874550				18405	I3	MTG	TC	Vip	GSM7345542
	20141	J1	V1C	OC	Pvalb	GSM6739926				12212	G1	V1C	OC	Lamp5	GSM6747097				13199	G4	LEC	TC	Pvalb	GSM7319977
	8944	D4	MTG	TC	Pvalb	GSM6799652				116	A1	A5-A7	PC	Sncg	GSM5422286				18842	J1	V1C	OC	Sst	GSM6707973
	20356	J1	V1C	OC	Pvalb	GSM6740169				19919	K1	M1C	FC	Vip	GSM6772198				12842	G4	LEC	TC	Vip	GSM7317892
	8956	D4	MTG	TC	Pvalb	GSM6799317				9350	E4	MTG	TC	Vip	GSM5160548				15963	H4	A46	FC	Sst	GSM7326640
	8948	D4	MTG	TC	Pvalb	GSM6800300				21588	L1	M1C	FC	Sst	GSM6780495				16073	H4	A46	FC	Pvalb	GSM7327445
	25563	L1	LEC	TC	Pvalb	GSM6810281				6368	D2	A46	FC	Pvalb	GSM6794985				14485	H2	Pro	OC	Sst	GSM6676591
	23311	K1	FI	FC	Pvalb	GSM6837811				9480	E4	MTG	TC	Pvalb	GSM5162132				18846	J1	V1C	OC	Lamp5	GSM6708012
	24697	K1	FI	FC	Pvalb	GSM6839307				76	A1	A5-A7	PC	Vip	GSM5422118				12819	G4	LEC	TC	Lamp5	GSM7317805
	26680	L1	LEC	TC	Pvalb	GSM6811542				15947	I1	LEC	TC	Lamp5	GSM6786438				16207	H4	A46	FC	Sst	GSM7328273
	27364	L1	LEC	TC	Pvalb	GSM6812306				9393	E4	MTG	TC	Sncg	GSM5161144				16100	H4	A46	FC	Vip	GSM7327597
	24102	K1	FI	FC	Pvalb	GSM6838669				19416	J3	A24	FC	Sst	GSM6874522				16092	H4	A46	FC	Pvalb	GSM7327562
	4084	C1	A5	PC	Pvalb	GSM5408995				16903	I1	LEC	TC	Vip	GSM6787720				18229	I3	MTG	TC	Sst	GSM7343402
	23743	K1	FI	FC	Pvalb	GSM6838285				9523	E4	MTG	TC	Pvalb	GSM5162812				15993	H4	A46	FC	Sst	GSM7326949
	20055	J1	V1C	OC	Pvalb	GSM6739831				20660	K1	M1C	FC	Vip	GSM6773247				18282	I3	MTG	TC	Pvalb	GSM7343922
	20628	J1	V1C	OC	Pvalb	GSM6740469				17004	I1	LEC	TC	Vip	GSM6787836				13122	G4	LEC	TC	Vip	GSM7319410
	4121	C1	A5	PC	Pvalb	GSM5409021				19920	K1	M1C	FC	Lamp5	GSM6772199				12943	G4	LEC	TC	Vip	GSM7318308
	19975	J1	V1C	OC	Pvalb	GSM6739738				17074	I1	LEC	TC	Pvalb	GSM6787914				544	A2	A5-A7	PC	Sst	GSM6352834
	17287	H4	LEC	TC	Pvalb	GSM7150218				20020	K1	M1C	FC	Sst	GSM6772340				15995	H4	A46	FC	Lamp5	GSM7326977
	23329	K1	FI	FC	Pvalb	GSM6837831				6393	D2	A46	FC	Pvalb	GSM6795493				18991	J1	V1C	OC	Sst	GSM6709485
	23454	K1	FI	FC	Pvalb	GSM6837969				19646	K1	M1C	FC	Pvalb	GSM6771844				12911	G4	LEC	TC	Sncg	GSM7318185
	20966	J1	V1C	OC	Pvalb	GSM6740862				12284	G1	V1C	OC	Vip	GSM6748145				13198	G4	LEC	TC	Vip	GSM7319975
	25151	K1	FI	FC	Pvalb	GSM6839797				16642	I1	LEC	TC	Lamp5	GSM6787394				2925	B3	DGC	HIP	Pvalb	GSM6525919
	27867	L1	LEC	TC	Pvalb	GSM6812886				4427	C2	A44-A45	FC	Pvalb	GSM7303073				5372	C4	CA1R	HIP	Sst	GSM6559550
	8157	D3	A46	FC	Pvalb	GSM6789230				19773	K1	M1C	FC	Pvalb	GSM6772009				18828	J1	V1C	OC	Lamp5	GSM6707819
	8963	D4	MTG	TC	Pvalb	GSM6798947				19382	J3	A24	FC	Sst	GSM6873924				11	A1	MTG	TC	Vip	GSM6333586
	23013	K1	FI	FC	Pvalb	GSM6837487				6389	D2	A46	FC	Vip	GSM6795419				13149	G4	LEC	TC	Sncg	GSM7319658
	8949	D4	MTG	TC	Pvalb	GSM6800430				12192	G1	V1C	OC	Vip	GSM6746723				15890	H4	A46	FC	Sst	GSM7326250
	27371	L1	LEC	TC	Pvalb	GSM6812313				19641	K1	M1C	FC	Lamp5	GSM6771838				542	A2	A5-A7	PC	Lamp5	GSM6352818
	16711	H4	LEC	TC	Pvalb	GSM7148694				15809	I1	LEC	TC	Pvalb	GSM6786256				15645	H3	A24	FC	Sst	GSM7338920
	27495	L1	LEC	TC	Pvalb	GSM6812467				16990	I1	LEC	TC	Pvalb	GSM6787820				979	A3	FI	FC	Sst	GSM6369654
	8191	D3	A46	FC	Pvalb	GSM6791378				17015	I1	LEC	TC	Pvalb	GSM6787849				16016	H4	A46	FC	Sst	GSM7327165
	4066	C1	A5	PC	Pvalb	GSM5408231				16946	I1	LEC	TC	Sncg	GSM6787771				15844	H4	A46	FC	Pvalb	GSM7325970
	24400	K1	FI	FC	Pvalb	GSM6838985				12256	G1	V1C	OC	Sst	GSM6747826				15794	H4	A46	FC	Pvalb	GSM7325668
	24484	K1	FI	FC	Pvalb	GSM6839079				15465	I1	LEC	TC	Sncg	GSM6785749				15882	H4	A46	FC	Pvalb	GSM7326197
	27811	L1	LEC	TC	Pvalb	GSM6812825				12196	G1	V1C	OC	Vip	GSM6746755				18946	J1	V1C	OC	Pvalb	GSM6709070
	8189	D3	A46	FC	Pvalb	GSM6790234				12203	G1	V1C	OC	Vip	GSM6746913				20871	J2	A24	FC	Lamp5	GSM6363524
	23746	K1	FI	FC	Pvalb	GSM6838289				9421	E4	MTG	TC	Sncg	GSM5161319				2521	B2	A44-A45	FC	Sst	GSM6406049
	24560	K1	FI	FC	Pvalb	GSM6839162				15919	I1	LEC	TC	Sncg	GSM6786404				15942	H4	A46	FC	Sst	GSM7326510
	8152	D3	A46	FC	Pvalb	GSM6788994				9392	E4	MTG	TC	Sst	GSM5161141				13090	G4	LEC	TC	Vip	GSM7319290
	21825	J1	V1C	OC	Pvalb	GSM6741858				9412	E4	MTG	TC	Sst	GSM5161270				515	A2	A5-A7	PC	Sst	GSM6352012
	20593	J1	V1C	OC	Pvalb	GSM6740427				16769	I1	LEC	TC	Sncg	GSM6787541				18264	I3	MTG	TC	Sncg	GSM7343697
	27733	L1	LEC	TC	Pvalb	GSM6812732				6458	D2	A46	FC	Sst	GSM6796635				13334	G4	LEC	TC	Lamp5	GSM7320771
	23636	K1	FI	FC	Pvalb	GSM6838169				9373	E4	MTG	TC	Lamp5	GSM5160945				12916	G4	LEC	TC	Lamp5	GSM7318211
	24686	K1	FI	FC	Pvalb	GSM6839296				6391	D2	A46	FC	Pvalb	GSM6795459				12847	G4	LEC	TC	Lamp5	GSM7317913
	24986	K1	FI	FC	Pvalb	GSM6839623				20711	K1	M1C	FC	Sst	GSM6773327				15944	H4	A46	FC	Vip	GSM7326531
	20457	J1	V1C	OC	Pvalb	GSM6740281				12216	G1	V1C	OC	Sst	GSM6747132				13227	G4	LEC	TC	Vip	GSM7320095
	20578	J1	V1C	OC	Pvalb	GSM6740411				20058	K1	M1C	FC	Vip	GSM6772388				18388	I3	MTG	TC	Vip	GSM7345256
	8150	D3	A46	FC	Pvalb	GSM6791563				20890	K1	M1C	FC	Sst	GSM6773567				16160	H4	A46	FC	Sst	GSM7328023
	25051	K1	FI	FC	Pvalb	GSM6839690				17035	I1	LEC	TC	Lamp5	GSM6787871				974	A3	FI	FC	Pvalb	GSM6369636
	20331	J1	V1C	OC	Pvalb	GSM6740140				9375	E4	MTG	TC	Vip	GSM5160973				13311	G4	LEC	TC	Sncg	GSM7320667
	22815	J2	A1C	TC	Pvalb	GSM7289935				11746	F4	CA1R-CA2R-CA3R	HIP	Lamp5	GSM5869201				15972	H4	A46	FC	Sncg	GSM7326687
	27480	L1	LEC	TC	Pvalb	GSM6812451				38	A1	A5-A7	PC	Pvalb	GSM5421902				12988	G4	LEC	TC	Lamp5	GSM7318601
	16679	H3	A24	FC	Pvalb	GSM6870549				16299	I1	LEC	TC	Sst	GSM6786897				13054	G4	LEC	TC	Sncg	GSM7318970
	24267	K1	FI	FC	Pvalb	GSM6838845				20490	K1	M1C	FC	Pvalb	GSM6773022				12893	G4	LEC	TC	Vip	GSM7318142
	23514	K1	FI	FC	Pvalb	GSM6838034				6331	D2	A46	FC	Sst	GSM6794311				15652	H3	A24	FC	Pvalb	GSM7339351
	27891	L1	LEC	TC	Pvalb	GSM6812913				9429	E4	MTG	TC	Sst	GSM5161377				15892	H4	A46	FC	Pvalb	GSM7326254
	21566	J1	V1C	OC	Pvalb	GSM6741563				19512	J3	A24	FC	Vip	GSM6876123				16209	H4	A46	FC	Vip	GSM7328290
	8945	D4	MTG	TC	Pvalb	GSM6799690				21218	K1	M1C	FC	Lamp5	GSM6774037				13145	G4	LEC	TC	Vip	GSM7319648
	23978	K1	FI	FC	Pvalb	GSM6838540				6432	D2	A46	FC	Pvalb	GSM6796264				12813	G4	LEC	TC	Vip	GSM7317789
	26022	L1	LEC	TC	Pvalb	GSM6810796				16623	I1	LEC	TC	Pvalb	GSM6787367				20747	J2	A24	FC	Pvalb	GSM6361802
	26748	L1	LEC	TC	Pvalb	GSM6811614				20	A1	A5-A7	PC	Pvalb	GSM5421751				16213	H4	A46	FC	Lamp5	GSM7328319
	8146	D3	A46	FC	Pvalb	GSM6790113				6453	D2	A46	FC	Sst	GSM6796575				13259	G4	LEC	TC	Vip	GSM7320251
	20185	J1	V1C	OC	Pvalb	GSM6739972				9380	E4	MTG	TC	Sncg	GSM5160998				12832	G4	LEC	TC	Vip	GSM7317855
	25695	L1	LEC	TC	Pvalb	GSM6810422				12274	G1	V1C	OC	Lamp5	GSM6748041				16075	H4	A46	FC	Vip	GSM7327459
	25879	L1	LEC	TC	Pvalb	GSM6810633				19951	K1	M1C	FC	Pvalb	GSM6772237				12846	G4	LEC	TC	Vip	GSM7317908
	27729	L1	LEC	TC	Pvalb	GSM6812727				9	A1	A5-A7	PC	Pvalb	GSM5421669				15772	H4	A46	FC	Sst	GSM7325540
	24915	K1	FI	FC	Pvalb	GSM6839540				16739	I1	LEC	TC	Lamp5	GSM6787506				13215	G4	LEC	TC	Pvalb	GSM7320025
	20676	J1	V1C	OC	Pvalb	GSM6740524				20744	K1	M1C	FC	Pvalb	GSM6773364				16042	H4	A46	FC	Lamp5	GSM7327321
	27835	L1	LEC	TC	Pvalb	GSM6812851				12272	G1	V1C	OC	Sst	GSM6748009				19026	J1	V1C	OC	Sst	GSM6709768
	24917	K1	FI	FC	Pvalb	GSM6839542				16096	I1	LEC	TC	Sst	GSM6786628				18738	J1	V1C	OC	Vip	GSM6706912
	16413	H3	A24	FC	Pvalb	GSM6869572				17042	I1	LEC	TC	Sst	GSM6787878				13279	G4	LEC	TC	Sncg	GSM7320434
	24744	K1	FI	FC	Pvalb	GSM6839355				21562	L1	M1C	FC	Lamp5	GSM6780415				13126	G4	LEC	TC	Sncg	GSM7319451
	20308	J1	V1C	OC	Pvalb	GSM6740113				20054	K1	M1C	FC	Pvalb	GSM6772383				18839	J1	V1C	OC	Vip	GSM6707931
	8186	D3	A46	FC	Pvalb	GSM6789557				15925	I1	LEC	TC	Sst	GSM6786413				12915	G4	LEC	TC	Vip	GSM7318201
	23178	K1	FI	FC	Pvalb	GSM6837663				21108	K1	M1C	FC	Vip	GSM6773872				13478	H1	MEC	TC	Lamp5	GSM6366205
	23106	K1	FI	FC	Pvalb	GSM6837587				9340	E4	MTG	TC	Vip	GSM5160472				18949	J1	V1C	OC	Sncg	GSM6709094
	26121	L1	LEC	TC	Pvalb	GSM6810910				9329	E4	MTG	TC	Lamp5	GSM5160191				15948	H4	A46	FC	Sst	GSM7326560
	8960	D4	MTG	TC	Pvalb	GSM6799153				16933	I1	LEC	TC	Lamp5	GSM6787752				12888	G4	LEC	TC	Pvalb	GSM7318106
	21295	J1	V1C	OC	Pvalb	GSM6741229				21556	L1	M1C	FC	Pvalb	GSM6780382				18850	J1	V1C	OC	Sst	GSM6708046
	27767	L1	LEC	TC	Pvalb	GSM6812774				12217	G1	V1C	OC	Pvalb	GSM6747152				15822	H4	A46	FC	Pvalb	GSM7325870
	23656	K1	FI	FC	Pvalb	GSM6838191				16606	I1	LEC	TC	Sst	GSM6787348				13114	G4	LEC	TC	Vip	GSM7319371
	8962	D4	MTG	TC	Pvalb	GSM6798849				12171	G1	V1C	OC	Vip	GSM6746476				13193	G4	LEC	TC	Lamp5	GSM7319937
	27813	L1	LEC	TC	Pvalb	GSM6812827				20167	K1	M1C	FC	Lamp5	GSM6772524				13107	G4	LEC	TC	Sncg	GSM7319340
	22980	K1	FI	FC	Pvalb	GSM6837453				12223	G1	V1C	OC	Lamp5	GSM6747369				13043	G4	LEC	TC	Vip	GSM7318816
	24528	K1	FI	FC	Pvalb	GSM6839125				142	A1	A5-A7	PC	Lamp5	GSM5422406				18759	J1	V1C	OC	Sst	GSM6707143
	24607	K1	FI	FC	Pvalb	GSM6839213				20599	K1	M1C	FC	Pvalb	GSM6773160				10667	F2	ITG	TC	Sst	GSM6357826
	25314	K1	FI	FC	Pvalb	GSM6839970				27	A1	A5-A7	PC	Pvalb	GSM5421818				18312	I3	MTG	TC	Vip	GSM7344354
	19930	J1	V1C	OC	Pvalb	GSM6739684				19498	J3	A24	FC	Sst	GSM6875848				13201	G4	LEC	TC	Vip	GSM7319991
	27778	L1	LEC	TC	Pvalb	GSM6812790				20061	K1	M1C	FC	Pvalb	GSM6772392				86	A1	MTG	TC	Lamp5	GSM6335529
	23032	K1	FI	FC	Pvalb	GSM6837506				21615	L1	M1C	FC	Pvalb	GSM6780586				13087	G4	LEC	TC	Pvalb	GSM7319241
	27755	L1	LEC	TC	Pvalb	GSM6812762				20219	K1	M1C	FC	Vip	GSM6772592				13249	G4	LEC	TC	Vip	GSM7320174
	4119	C1	A5	PC	Pvalb	GSM5408942				9453	E4	MTG	TC	Vip	GSM5161775				13340	G4	LEC	TC	Pvalb	GSM7320836
	23244	K1	FI	FC	Pvalb	GSM6837738				14031	H2	S1C	PC	Sst	GSM5457392				18450	I3	MTG	TC	Pvalb	GSM7346109
	16594	H3	A24	FC	Pvalb	GSM6870361				16327	I1	LEC	TC	Vip	GSM6786933				15627	H3	A24	FC	Vip	GSM7338263
	23201	K1	FI	FC	Pvalb	GSM6837690				12224	G1	V1C	OC	Vip	GSM6747396				18276	I3	MTG	TC	Sst	GSM7343805
	17466	H4	LEC	TC	Pvalb	GSM7150471				19650	K1	M1C	FC	Lamp5	GSM6771848				16211	H4	A46	FC	Lamp5	GSM7328300
	23103	K1	FI	FC	Pvalb	GSM6837584				20135	K1	M1C	FC	Pvalb	GSM6772486				16125	H4	A46	FC	Pvalb	GSM7327740
	20305	J1	V1C	OC	Pvalb	GSM6740109				16464	I1	LEC	TC	Vip	GSM6787144				16136	H4	A46	FC	Vip	GSM7327846
	25997	L1	LEC	TC	Pvalb	GSM6810769				16188	I1	LEC	TC	Lamp5	GSM6786748				18422	I3	MTG	TC	Vip	GSM7345770
	16569	H3	A24	FC	Pvalb	GSM6870217				17089	I1	LEC	TC	Lamp5	GSM6787934				13325	G4	LEC	TC	Lamp5	GSM7320737
	25021	K1	FI	FC	Pvalb	GSM6839659				20021	K1	M1C	FC	Pvalb	GSM6772341				18224	I3	MTG	TC	Vip	GSM7343354
	20696	J1	V1C	OC	Pvalb	GSM6740547				21271	K1	M1C	FC	Pvalb	GSM6774131				13224	G4	LEC	TC	Lamp5	GSM7320080
	17391	H4	LEC	TC	Pvalb	GSM7150374				15464	I1	LEC	TC	Pvalb	GSM6785748				13047	G4	LEC	TC	Sncg	GSM7318837
	4058	C1	A5	PC	Pvalb	GSM5408139				9538	E4	MTG	TC	Sst	GSM5163121				18409	I3	MTG	TC	Vip	GSM7345586
	19802	J1	V1C	OC	Pvalb	GSM6739546				12244	G1	V1C	OC	Lamp5	GSM6747655				16009	H4	A46	FC	Pvalb	GSM7327104
	4081	C1	A5	PC	Pvalb	GSM5408938				19739	K1	M1C	FC	Pvalb	GSM6771964				13281	G4	LEC	TC	Lamp5	GSM7320438
	23747	K1	FI	FC	Pvalb	GSM6838291				15768	I1	LEC	TC	Pvalb	GSM6786209				18906	J1	V1C	OC	Vip	GSM6708671
	25699	L1	LEC	TC	Pvalb	GSM6810428				20439	K1	M1C	FC	Sncg	GSM6772961				16187	H4	A46	FC	Lamp5	GSM7328175
	16425	H3	A24	FC	Pvalb	GSM6869611				17055	I1	LEC	TC	Sst	GSM6787892				15819	H4	A46	FC	Pvalb	GSM7325842
	16646	H3	A24	FC	Sncg	GSM6870485				15611	I1	LEC	TC	Lamp5	GSM6785969				12996	G4	LEC	TC	Lamp5	GSM7318660
	8218	D3	A46	FC	Sncg	GSM6791921				9499	E4	MTG	TC	Pvalb	GSM5162417				18892	J1	V1C	OC	Sst	GSM6708466
	8214	D3	A46	FC	Sncg	GSM6791286				15831	I1	LEC	TC	Sst	GSM6786283				16212	H4	A46	FC	Pvalb	GSM7328317
	26371	L1	LEC	TC	Sncg	GSM6811207				16442	I1	LEC	TC	Sst	GSM6787114				16090	H4	A46	FC	Pvalb	GSM7327548
	26485	L1	LEC	TC	Sncg	GSM6811330				12273	G1	V1C	OC	Lamp5	GSM6748010				18891	J1	V1C	OC	Sst	GSM6708464
	26595	L1	LEC	TC	Sncg	GSM6811445				6375	D2	A46	FC	Sst	GSM6795202				16976	I1	A1C	TC	Pvalb	GSM6314208
	26580	L1	LEC	TC	Sncg	GSM6811429				20068	K1	M1C	FC	Sst	GSM6772400				11418	G1	S1C	PC	Pvalb	GSM6307922
	26570	L1	LEC	TC	Sncg	GSM6811419				18566	J2	M1C	FC	Lamp5	GSM5152243				5337	C4	CA1R	HIP	Lamp5	GSM6558046
	26593	L1	LEC	TC	Sncg	GSM6811443				20108	K1	M1C	FC	Lamp5	GSM6772451				13352	G4	LEC	TC	Vip	GSM7320939
	26601	L1	LEC	TC	Sncg	GSM6811453				15992	I1	LEC	TC	Lamp5	GSM6786490				12845	G4	LEC	TC	Pvalb	GSM7317904
	26461	L1	LEC	TC	Sncg	GSM6811303				15747	I1	LEC	TC	Vip	GSM6786183				20860	J2	A24	FC	Sncg	GSM6363395
	26964	L1	LEC	TC	Sncg	GSM6811865				15684	I1	LEC	TC	Vip	GSM6786087				13108	G4	LEC	TC	Lamp5	GSM7319341
	26506	L1	LEC	TC	Sncg	GSM6811351				16931	I1	LEC	TC	Vip	GSM6787750				15655	H3	A24	FC	Lamp5	GSM7339508
	26383	L1	LEC	TC	Sncg	GSM6811219				16005	I1	LEC	TC	Lamp5	GSM6786511				16098	H4	A46	FC	Pvalb	GSM7327591
	26624	L1	LEC	TC	Sncg	GSM6811479				89	A1	A5-A7	PC	Pvalb	GSM5422151				15611	H3	A24	FC	Vip	GSM7337604
	27685	L1	LEC	TC	Sncg	GSM6812674				15177	I1	LEC	TC	Pvalb	GSM6785132				15889	H4	A46	FC	Sst	GSM7326242
	26544	L1	LEC	TC	Sncg	GSM6811391				9554	E4	MTG	TC	Vip	GSM5163225				12997	G4	LEC	TC	Vip	GSM7318663
	26344	L1	LEC	TC	Sncg	GSM6811176				21024	K1	M1C	FC	Pvalb	GSM6773756				12860	G4	LEC	TC	Vip	GSM7317963
	26468	L1	LEC	TC	Sncg	GSM6811310				20041	K1	M1C	FC	Lamp5	GSM6772363				12849	G4	LEC	TC	Lamp5	GSM7317916
	26330	L1	LEC	TC	Sncg	GSM6811162				12297	G1	V1C	OC	Lamp5	GSM6748227				20809	J2	A24	FC	Vip	GSM6362380
	26658	L1	LEC	TC	Sncg	GSM6811519				21014	K1	M1C	FC	Pvalb	GSM6773746				18872	J1	V1C	OC	Pvalb	GSM6708313
	27139	L1	LEC	TC	Sncg	GSM6812057				12267	G1	V1C	OC	Pvalb	GSM6747955				18799	J1	V1C	OC	Lamp5	GSM6707441
	26938	L1	LEC	TC	Sncg	GSM6811834				16018	I1	LEC	TC	Vip	GSM6786532				18788	J1	V1C	OC	Vip	GSM6707359
	25945	L1	LEC	TC	Sncg	GSM6810713				18563	J2	M1C	FC	Vip	GSM5152239				11617	G1	S1C	PC	Sst	GSM6309879
	27199	L1	LEC	TC	Sncg	GSM6812123				21169	K1	M1C	FC	Lamp5	GSM6773959				12990	G4	LEC	TC	Pvalb	GSM7318612
	26413	L1	LEC	TC	Sncg	GSM6811249				12222	G1	V1C	OC	Lamp5	GSM6747352				15988	H4	A46	FC	Sst	GSM7326862
	26316	L1	LEC	TC	Sncg	GSM6811146				16812	I1	LEC	TC	Lamp5	GSM6787601				16133	H4	A46	FC	Lamp5	GSM7327809
	24277	K1	FI	FC	Sncg	GSM6838855				19858	K1	M1C	FC	Pvalb	GSM6772125				12883	G4	LEC	TC	Pvalb	GSM7318059
	25934	L1	LEC	TC	Sncg	GSM6810700				15472	I1	LEC	TC	Pvalb	GSM6785758				13088	G4	LEC	TC	Lamp5	GSM7319245
	25846	L1	LEC	TC	Sncg	GSM6810593				19427	J3	A24	FC	Vip	GSM6874666				18961	J1	V1C	OC	Sst	GSM6709183
	25933	L1	LEC	TC	Sncg	GSM6810697				12261	G1	V1C	OC	Vip	GSM6747923				18731	J1	V1C	OC	Pvalb	GSM6706820
	26294	L1	LEC	TC	Sncg	GSM6811119				16702	I1	LEC	TC	Vip	GSM6787458				20798	J2	A24	FC	Sncg	GSM6362299
	26581	L1	LEC	TC	Sncg	GSM6811430				19834	K1	M1C	FC	Pvalb	GSM6772097				13275	G4	LEC	TC	Lamp5	GSM7320407
	25578	L1	LEC	TC	Sncg	GSM6810298				21112	K1	M1C	FC	Vip	GSM6773876				18792	J1	V1C	OC	Sst	GSM6707388
	26337	L1	LEC	TC	Sncg	GSM6811169				9460	E4	MTG	TC	Pvalb	GSM5161856				15660	H3	A24	FC	Sst	GSM7339665
	27594	L1	LEC	TC	Sncg	GSM6812576				9511	E4	MTG	TC	Sncg	GSM5162480				15770	H4	A46	FC	Vip	GSM7325529
	27679	L1	LEC	TC	Sncg	GSM6812668				16705	I1	LEC	TC	Pvalb	GSM6787461				16153	H4	A46	FC	Lamp5	GSM7327982
	26888	L1	LEC	TC	Sncg	GSM6811777				21447	L1	M1C	FC	Sst	GSM6779976				12821	G4	LEC	TC	Sncg	GSM7317808
	26828	L1	LEC	TC	Sncg	GSM6811712				42	A1	A5-A7	PC	Sst	GSM5421932				12856	G4	LEC	TC	Vip	GSM7317949
	16990	H4	LEC	TC	Sncg	GSM7149483				9435	E4	MTG	TC	Sst	GSM5161424				15850	H4	A46	FC	Sst	GSM7326002
	26477	L1	LEC	TC	Sncg	GSM6811321				12206	G1	V1C	OC	Vip	GSM6746986				975	A3	FI	FC	Pvalb	GSM6369639
	26515	L1	LEC	TC	Sncg	GSM6811361				3677	C1	FI	FC	Lamp5	GSM7228198				984	A3	FI	FC	Sst	GSM6369671
	25599	L1	LEC	TC	Sncg	GSM6810320				19802	K1	M1C	FC	Lamp5	GSM6772053				15980	H4	A46	FC	Vip	GSM7326793
	25937	L1	LEC	TC	Sncg	GSM6810703				20491	K1	M1C	FC	Sst	GSM6773024				18957	J1	V1C	OC	Sst	GSM6709140
	27548	L1	LEC	TC	Sncg	GSM6812527				9403	E4	MTG	TC	Vip	GSM5161218				15792	H4	A46	FC	Vip	GSM7325653
	27657	L1	LEC	TC	Sncg	GSM6812643				16223	I1	LEC	TC	Lamp5	GSM6786796				13175	G4	LEC	TC	Sncg	GSM7319827
	26801	L1	LEC	TC	Sncg	GSM6811682				12199	G1	V1C	OC	Sncg	GSM6746828				16161	H4	A46	FC	Lamp5	GSM7328034
	26872	L1	LEC	TC	Sncg	GSM6811759				16949	I1	LEC	TC	Sst	GSM6787774				18373	I3	MTG	TC	Lamp5	GSM7345027
	25848	L1	LEC	TC	Sncg	GSM6810596				12241	G1	V1C	OC	Sst	GSM6747612				5304	C4	CA1R	HIP	Lamp5	GSM6556685
	25837	L1	LEC	TC	Sncg	GSM6810580				14075	H2	S1C	PC	Sst	GSM5457620				13152	G4	LEC	TC	Lamp5	GSM7319694
	25838	L1	LEC	TC	Sncg	GSM6810584				15604	I1	LEC	TC	Sst	GSM6785958				2528	B2	A44-A45	FC	Pvalb	GSM6406069
	26665	L1	LEC	TC	Sncg	GSM6811526				16317	I1	LEC	TC	Vip	GSM6786922				18340	I3	MTG	TC	Sncg	GSM7344649
	26313	L1	LEC	TC	Sncg	GSM6811143				9343	E4	MTG	TC	Lamp5	GSM5160506				16175	H4	A46	FC	Sst	GSM7328119
	26418	L1	LEC	TC	Sncg	GSM6811255				16643	I1	LEC	TC	Pvalb	GSM6787395				13328	G4	LEC	TC	Sncg	GSM7320751
	26861	L1	LEC	TC	Sncg	GSM6811747				12239	G1	V1C	OC	Sst	GSM6747605				12827	G4	LEC	TC	Lamp5	GSM7317819
	25906	L1	LEC	TC	Sncg	GSM6810667				47	A1	A5-A7	PC	Sst	GSM5421953				16074	H4	A46	FC	Sst	GSM7327454
	25602	L1	LEC	TC	Sncg	GSM6810324				16994	I1	LEC	TC	Sst	GSM6787824				13093	G4	LEC	TC	Lamp5	GSM7319295
	26644	L1	LEC	TC	Sncg	GSM6811501				19847	K1	M1C	FC	Vip	GSM6772111				12981	G4	LEC	TC	Pvalb	GSM7318537
	26190	L1	LEC	TC	Sncg	GSM6810997				21609	L1	M1C	FC	Pvalb	GSM6780556				20882	J2	A24	FC	Sst	GSM6363641
	25897	L1	LEC	TC	Sncg	GSM6810658				21756	L1	M1C	FC	Vip	GSM6781304				12929	G4	LEC	TC	Vip	GSM7318249
	8222	D3	A46	FC	Sncg	GSM6790386				82	A1	A5-A7	PC	Vip	GSM5422133				18986	J1	V1C	OC	Vip	GSM6709447
	26706	L1	LEC	TC	Sncg	GSM6811569				11725	F4	CA1R-CA2R-CA3R	HIP	Sncg	GSM5868069				5370	C4	CA1R	HIP	Pvalb	GSM6559547
	26817	L1	LEC	TC	Sncg	GSM6811699				20797	K1	M1C	FC	Lamp5	GSM6773434				16095	H4	A46	FC	Sst	GSM7327574
	26990	L1	LEC	TC	Sncg	GSM6811894				21741	L1	M1C	FC	Pvalb	GSM6781176				13186	G4	LEC	TC	Lamp5	GSM7319880
	25778	L1	LEC	TC	Sncg	GSM6810517				16024	I1	LEC	TC	Pvalb	GSM6786541				13211	G4	LEC	TC	Vip	GSM7320016
	25820	L1	LEC	TC	Sncg	GSM6810563				13352	H1	A46	FC	Vip	GSM5118667				5338	C4	CA1R	HIP	Lamp5	GSM6558065
	24263	K1	FI	FC	Sncg	GSM6838839				12167	G1	V1C	OC	Vip	GSM6746215				13075	G4	LEC	TC	Vip	GSM7319165
	16939	H4	LEC	TC	Sncg	GSM7149427				20012	K1	M1C	FC	Lamp5	GSM6772331				15859	H4	A46	FC	Pvalb	GSM7326065
	26931	L1	LEC	TC	Sncg	GSM6811827				20880	K1	M1C	FC	Sst	GSM6773555				13324	G4	LEC	TC	Lamp5	GSM7320718
	25810	L1	LEC	TC	Sncg	GSM6810552				9464	E4	MTG	TC	Sst	GSM5161888				134	A1	MTG	TC	Pvalb	GSM6336172
	24068	K1	FI	FC	Sncg	GSM6838633				19913	K1	M1C	FC	Lamp5	GSM6772191				15783	H4	A46	FC	Pvalb	GSM7325602
	27226	L1	LEC	TC	Sncg	GSM6812150				19480	J3	A24	FC	Pvalb	GSM6875552				16188	H4	A46	FC	Vip	GSM7328178
	23409	K1	FI	FC	Sncg	GSM6837921				9430	E4	MTG	TC	Pvalb	GSM5161380				13052	G4	LEC	TC	Vip	GSM7318956
	27244	L1	LEC	TC	Sncg	GSM6812172				22068	L2	A1C	TC	Sst	GSM7292633				13301	G4	LEC	TC	Pvalb	GSM7320583
	26949	L1	LEC	TC	Sncg	GSM6811846				6428	D2	A46	FC	Vip	GSM6796212				12977	G4	LEC	TC	Sncg	GSM7318520
	25006	K1	FI	FC	Sncg	GSM6839644				19520	J3	A24	FC	Pvalb	GSM6876330				18757	J1	V1C	OC	Vip	GSM6707111
	23527	K1	FI	FC	Sncg	GSM6838048				22208	L2	A1C	TC	Vip	GSM7293361				18890	J1	V1C	OC	Sst	GSM6708456
	27181	L1	LEC	TC	Sncg	GSM6812103				20570	K1	M1C	FC	Pvalb	GSM6773124				18937	J1	V1C	OC	Sncg	GSM6708983
	22636	J2	A1C	TC	Sncg	GSM7289350				12249	G1	V1C	OC	Sst	GSM6747719				16107	H4	A46	FC	Sst	GSM7327649
	26218	L1	LEC	TC	Sncg	GSM6811027				12266	G1	V1C	OC	Pvalb	GSM6747949				13267	G4	LEC	TC	Vip	GSM7320317
	16342	H3	A24	FC	Sncg	GSM6869266				9404	E4	MTG	TC	Pvalb	GSM5161222				15868	H4	A46	FC	Lamp5	GSM7326115
	27011	L1	LEC	TC	Sncg	GSM6811915				9354	E4	MTG	TC	Sst	GSM5160585				18384	I3	MTG	TC	Sst	GSM7345211
	24282	K1	FI	FC	Sncg	GSM6838862				21231	K1	M1C	FC	Lamp5	GSM6774059				2518	B2	A44-A45	FC	Vip	GSM6406037
	25993	L1	LEC	TC	Sncg	GSM6810765				23473	M2	LEC	TC	Lamp5	GSM7154060				16173	H4	A46	FC	Vip	GSM7328105
	16340	H3	A24	FC	Sncg	GSM6869262				19790	K1	M1C	FC	Pvalb	GSM6772035				18751	J1	V1C	OC	Vip	GSM6707039
	25760	L1	LEC	TC	Sncg	GSM6810497				9333	E4	MTG	TC	Sncg	GSM5160271				13065	G4	LEC	TC	Vip	GSM7319029
	8201	D3	A46	FC	Sncg	GSM6789163				15087	I1	LEC	TC	Vip	GSM6785018				12999	G4	LEC	TC	Sncg	GSM7318665
	26615	L1	LEC	TC	Sncg	GSM6811470				20112	K1	M1C	FC	Lamp5	GSM6772456				18436	I3	MTG	TC	Sst	GSM7345940
	26881	L1	LEC	TC	Sncg	GSM6811770				21315	L1	M1C	FC	Pvalb	GSM6779424				13794	H1	MEC	TC	Vip	GSM6368374
	25496	L1	LEC	TC	Sncg	GSM6810207				68	A1	A5-A7	PC	Pvalb	GSM5422108				15673	H3	A24	FC	Sst	GSM7339950
	25606	L1	LEC	TC	Sncg	GSM6810328				12220	G1	V1C	OC	Vip	GSM6747200				13080	G4	LEC	TC	Vip	GSM7319186
	27560	L1	LEC	TC	Sncg	GSM6812539				14056	H2	S1C	PC	Lamp5	GSM5457490				20890	J2	A24	FC	Lamp5	GSM6363791
	8971	D4	MTG	TC	Sncg	GSM6799571				14	A1	A5-A7	PC	Vip	GSM5421705				13329	G4	LEC	TC	Sncg	GSM7320754
	17375	H4	LEC	TC	Sncg	GSM7150353				123	A1	A5-A7	PC	Vip	GSM5422314				13009	G4	LEC	TC	Pvalb	GSM7318695
	26269	L1	LEC	TC	Sncg	GSM6811088				15692	I1	LEC	TC	Vip	GSM6786104				15639	H3	A24	FC	Sst	GSM7338549
	25429	L1	LEC	TC	Sncg	GSM6810132				6396	D2	A46	FC	Lamp5	GSM6795515				13069	G4	LEC	TC	Vip	GSM7319065
	25856	L1	LEC	TC	Sncg	GSM6810608				16028	I1	LEC	TC	Sncg	GSM6786547				15919	H4	A46	FC	Sst	GSM7326427
	24978	K1	FI	FC	Sncg	GSM6839613				8845	E3	DGR-CA4Rpy	HIP	Pvalb	GSM5865830				10665	F2	ITG	TC	Sst	GSM6357810
	25622	L1	LEC	TC	Sncg	GSM6810344				9339	E4	MTG	TC	Sst	GSM5160466				12906	G4	LEC	TC	Pvalb	GSM7318167
	25930	L1	LEC	TC	Sncg	GSM6810694				21752	L1	M1C	FC	Vip	GSM6781267				13156	G4	LEC	TC	Vip	GSM7319699
	24750	K1	FI	FC	Sncg	GSM6839361				19901	K1	M1C	FC	Pvalb	GSM6772177				13148	G4	LEC	TC	Sst	GSM7319656
	26527	L1	LEC	TC	Sncg	GSM6811373				20044	K1	M1C	FC	Sst	GSM6772370				13128	G4	LEC	TC	Lamp5	GSM7319550
	24670	K1	FI	FC	Sncg	GSM6839280				21065	K1	M1C	FC	Sst	GSM6773813				12844	G4	LEC	TC	Lamp5	GSM7317903
	25067	K1	FI	FC	Sncg	GSM6839706				15743	I1	LEC	TC	Sst	GSM6786177				978	A3	FI	FC	Vip	GSM6369650
	8217	D3	A46	FC	Sncg	GSM6791829				16654	I1	LEC	TC	Sst	GSM6787406				11659	G1	S1C	PC	Sncg	GSM6310182
	24198	K1	FI	FC	Sncg	GSM6838771				15972	I1	LEC	TC	Vip	GSM6786466				12930	G4	LEC	TC	Lamp5	GSM7318250
	8203	D3	A46	FC	Sncg	GSM6790524				16140	I1	LEC	TC	Lamp5	GSM6786683				16048	H4	A46	FC	Sst	GSM7327344
	8965	D4	MTG	TC	Sncg	GSM6799601				9383	E4	MTG	TC	Sncg	GSM5161061				12829	G4	LEC	TC	Sncg	GSM7317831
	26667	L1	LEC	TC	Sncg	GSM6811529				4360	C2	A44-A45	FC	Sst	GSM7302313				13715	H1	MEC	TC	Lamp5	GSM6367910
	23560	K1	FI	FC	Sncg	GSM6838084				9397	E4	MTG	TC	Sst	GSM5161176				12944	G4	LEC	TC	Vip	GSM7318309
	27486	L1	LEC	TC	Sncg	GSM6812458				15826	I1	LEC	TC	Vip	GSM6786278				11428	G1	S1C	PC	Lamp5	GSM6307968
	24164	K1	FI	FC	Sncg	GSM6838735				15853	I1	LEC	TC	Vip	GSM6786308				13787	H1	MEC	TC	Lamp5	GSM6368346
	10297	E2	FI	FC	Sncg	GSM7212192				23537	M2	LEC	TC	Lamp5	GSM7154460				16201	H4	A46	FC	Vip	GSM7328244
	27020	L1	LEC	TC	Sncg	GSM6811924				20002	K1	M1C	FC	Sst	GSM6772320				2944	B3	DGC	HIP	Vip	GSM6526319
	23068	K1	FI	FC	Sncg	GSM6837547				12246	G1	V1C	OC	Sst	GSM6747678				12937	G4	LEC	TC	Lamp5	GSM7318281
	27598	L1	LEC	TC	Sncg	GSM6812580				12181	G1	V1C	OC	Lamp5	GSM6746674				18455	I3	MTG	TC	Sst	GSM7346191
	20512	J1	V1C	OC	Sncg	GSM6740342				19628	K1	M1C	FC	Pvalb	GSM6771820				12961	G4	LEC	TC	Sst	GSM7318422
	24833	K1	FI	FC	Sncg	GSM6839449				20567	K1	M1C	FC	Pvalb	GSM6773121				2515	B2	A44-A45	FC	Sst	GSM6406027
	8221	D3	A46	FC	Sncg	GSM6790089				20659	K1	M1C	FC	Pvalb	GSM6773245				18870	J1	V1C	OC	Pvalb	GSM6708301
	26989	L1	LEC	TC	Sncg	GSM6811893				6346	D2	A46	FC	Sst	GSM6794540				18918	J1	V1C	OC	Sst	GSM6708771
	27912	L1	LEC	TC	Sncg	GSM6812938				9498	E4	MTG	TC	Sst	GSM5162416				15874	H4	A46	FC	Sncg	GSM7326166
	21168	J1	V1C	OC	Sncg	GSM6741093				19756	K1	M1C	FC	Vip	GSM6771988				18284	I3	MTG	TC	Sst	GSM7343933
	24009	K1	FI	FC	Sncg	GSM6838573				21101	K1	M1C	FC	Pvalb	GSM6773865				12833	G4	LEC	TC	Pvalb	GSM7317857
	24057	K1	FI	FC	Sncg	GSM6838622				21555	L1	M1C	FC	Pvalb	GSM6780377				2538	B2	A44-A45	FC	Sncg	GSM6406111
	26428	L1	LEC	TC	Sncg	GSM6811267				20395	K1	M1C	FC	Lamp5	GSM6772885				8185	E1	A19	OC	Lamp5	GSM6330259
	24817	K1	FI	FC	Sncg	GSM6839432				19718	K1	M1C	FC	Pvalb	GSM6771938				20875	J2	A24	FC	Pvalb	GSM6363561
	23704	K1	FI	FC	Sncg	GSM6838245				20289	K1	M1C	FC	Pvalb	GSM6772684				5358	C4	CA1R	HIP	Lamp5	GSM6558883
	23998	K1	FI	FC	Sncg	GSM6838561				16335	I1	LEC	TC	Pvalb	GSM6786943				13210	G4	LEC	TC	Vip	GSM7320015
	24658	K1	FI	FC	Sncg	GSM6839268				21742	L1	M1C	FC	Sncg	GSM6781183				12913	G4	LEC	TC	Vip	GSM7318189
	26276	L1	LEC	TC	Sncg	GSM6811097				20443	K1	M1C	FC	Sst	GSM6772965				12882	G4	LEC	TC	Vip	GSM7318056
	27098	L1	LEC	TC	Sncg	GSM6812011				15119	I1	LEC	TC	Pvalb	GSM6785060				16194	H4	A46	FC	Sst	GSM7328208
	8204	D3	A46	FC	Sncg	GSM6791294				16004	I1	LEC	TC	Pvalb	GSM6786510				1032	A3	FI	FC	Vip	GSM6370081
	25533	L1	LEC	TC	Sncg	GSM6810248				3734	C1	FI	FC	Sncg	GSM7228495				18787	J1	V1C	OC	Pvalb	GSM6707350
	23366	K1	FI	FC	Sncg	GSM6837873				11778	F4	CA1R-CA2R-CA3R	HIP	Sst	GSM5869859				18364	I3	MTG	TC	Vip	GSM7344936
	25619	L1	LEC	TC	Sncg	GSM6810341				19561	K1	M1C	FC	Pvalb	GSM6771731				13288	G4	LEC	TC	Vip	GSM7320483
	23976	K1	FI	FC	Sncg	GSM6838538				20852	K1	M1C	FC	Vip	GSM6773518				16041	H4	A46	FC	Sst	GSM7327318
	27344	L1	LEC	TC	Sncg	GSM6812285				14021	H2	S1C	PC	Vip	GSM5457369				13345	G4	LEC	TC	Lamp5	GSM7320877
	17395	H4	LEC	TC	Sncg	GSM7150378				21172	K1	M1C	FC	Sst	GSM6773964				15649	H3	A24	FC	Pvalb	GSM7339202
	27316	L1	LEC	TC	Sncg	GSM6812253				9522	E4	MTG	TC	Sst	GSM5162783				13218	G4	LEC	TC	Lamp5	GSM7320052
	24454	K1	FI	FC	Sncg	GSM6839043				19580	K1	M1C	FC	Pvalb	GSM6771762				13322	G4	LEC	TC	Pvalb	GSM7320711
	8970	D4	MTG	TC	Sncg	GSM6799035				20901	K1	M1C	FC	Pvalb	GSM6773580				2520	B2	A44-A45	FC	Vip	GSM6406046
	24033	K1	FI	FC	Sncg	GSM6838597				9486	E4	MTG	TC	Pvalb	GSM5162199				13019	G4	LEC	TC	Sst	GSM7318736
	24904	K1	FI	FC	Sncg	GSM6839529				21333	L1	M1C	FC	Sncg	GSM6779512				13225	G4	LEC	TC	Lamp5	GSM7320085
	26126	L1	LEC	TC	Sncg	GSM6810916				9384	E4	MTG	TC	Sst	GSM5161073				14487	H2	Pro	OC	Pvalb	GSM6676599
	8974	D4	MTG	TC	Sncg	GSM6799531				9507	E4	MTG	TC	Vip	GSM5162468				15806	H4	A46	FC	Sst	GSM7325767
	25870	L1	LEC	TC	Sncg	GSM6810623				15579	I1	LEC	TC	Vip	GSM6785923				18401	I3	MTG	TC	Sst	GSM7345504
	22916	K1	FI	FC	Sncg	GSM6837387				86	A1	A5-A7	PC	Lamp5	GSM5422146				20758	J2	A24	FC	Sst	GSM6361934
	25714	L1	LEC	TC	Sncg	GSM6810446				9478	E4	MTG	TC	Pvalb	GSM5162100				16120	H4	A46	FC	Sst	GSM7327715
	8212	D3	A46	FC	Sncg	GSM6790585				20113	K1	M1C	FC	Sncg	GSM6772457				18358	I3	MTG	TC	Sst	GSM7344885
	27110	L1	LEC	TC	Sncg	GSM6812024				9434	E4	MTG	TC	Sncg	GSM5161411				12976	G4	LEC	TC	Sncg	GSM7318509
	27314	L1	LEC	TC	Sncg	GSM6812251				9494	E4	MTG	TC	Sncg	GSM5162399				13260	G4	LEC	TC	Vip	GSM7320253
	27096	L1	LEC	TC	Sncg	GSM6812009				16086	I1	LEC	TC	Lamp5	GSM6786616				16137	H4	A46	FC	Lamp5	GSM7327852
	25378	L1	LEC	TC	Sncg	GSM6810078				20748	K1	M1C	FC	Pvalb	GSM6773368				15962	H4	A46	FC	Vip	GSM7326637
	8205	D3	A46	FC	Sncg	GSM6789012				55	A1	A5-A7	PC	Pvalb	GSM5422045				16117	H4	A46	FC	Pvalb	GSM7327703
	8208	D3	A46	FC	Sncg	GSM6789159				11	A1	A5-A7	PC	Sst	GSM5421675				12874	G4	LEC	TC	Pvalb	GSM7318035
	25255	K1	FI	FC	Sncg	GSM6839906				9479	E4	MTG	TC	Vip	GSM5162102				13023	G4	LEC	TC	Vip	GSM7318747
	27675	L1	LEC	TC	Sncg	GSM6812663				16725	I1	LEC	TC	Vip	GSM6787484				16170	H4	A46	FC	Pvalb	GSM7328080
	20401	J1	V1C	OC	Sncg	GSM6740218				20504	K1	M1C	FC	Lamp5	GSM6773040				15637	H3	A24	FC	Sst	GSM7338498
	4133	C1	A5	PC	Sncg	GSM5408238				16721	I1	LEC	TC	Pvalb	GSM6787480				12964	G4	LEC	TC	Vip	GSM7318432
	8980	D4	MTG	TC	Sncg	GSM6799578				19456	J3	A24	FC	Sncg	GSM6875160				13237	G4	LEC	TC	Lamp5	GSM7320126
	8216	D3	A46	FC	Sncg	GSM6791586				9450	E4	MTG	TC	Sncg	GSM5161720				12917	G4	LEC	TC	Lamp5	GSM7318212
	8200	D3	A46	FC	Sncg	GSM6789242				9510	E4	MTG	TC	Sst	GSM5162479				15843	H4	A46	FC	Lamp5	GSM7325963
	17454	H4	LEC	TC	Sncg	GSM7150454				15467	I1	LEC	TC	Sst	GSM6785751				8280	E1	A19	OC	Lamp5	GSM6332446
	27007	L1	LEC	TC	Sncg	GSM6811911				14127	H2	S1C	PC	Vip	GSM5458255				22137	K1	CA1C	HIP	Vip	GSM6521616
	8207	D3	A46	FC	Sncg	GSM6789156				9476	E4	MTG	TC	Vip	GSM5162095				16114	H4	A46	FC	Pvalb	GSM7327687
	27305	L1	LEC	TC	Sncg	GSM6812242				21046	K1	M1C	FC	Lamp5	GSM6773782				18758	J1	V1C	OC	Sst	GSM6707140
	24702	K1	FI	FC	Sncg	GSM6839312				21712	L1	M1C	FC	Pvalb	GSM6781028				16109	H4	A46	FC	Sncg	GSM7327671
	25908	L1	LEC	TC	Sncg	GSM6810669				9458	E4	MTG	TC	Sst	GSM5161848				13257	G4	LEC	TC	Lamp5	GSM7320234
	23084	K1	FI	FC	Sncg	GSM6837564				19649	K1	M1C	FC	Lamp5	GSM6771847				12667	G3	V2	OC	Lamp5	GSM6325512
	23261	K1	FI	FC	Sncg	GSM6837755				9355	E4	MTG	TC	Sst	GSM5160617				18939	J1	V1C	OC	Sst	GSM6708989
	22521	J2	A1C	TC	Sncg	GSM7288478				16612	I1	LEC	TC	Vip	GSM6787355				15920	H4	A46	FC	Pvalb	GSM7326428
	25886	L1	LEC	TC	Sncg	GSM6810642				16400	I1	LEC	TC	Vip	GSM6787047				18968	J1	V1C	OC	Pvalb	GSM6709226
	26131	L1	LEC	TC	Sncg	GSM6810922				18721	J2	M1C	FC	Sncg	GSM5152606				15860	H4	A46	FC	Lamp5	GSM7326069
	23749	K1	FI	FC	Sncg	GSM6838293				19409	J3	A24	FC	Lamp5	GSM6874414				13098	G4	LEC	TC	Pvalb	GSM7319313
	8210	D3	A46	FC	Sncg	GSM6789304				16404	I1	LEC	TC	Lamp5	GSM6787065				13153	G4	LEC	TC	Vip	GSM7319695
	27341	L1	LEC	TC	Sncg	GSM6812281				21243	K1	M1C	FC	Pvalb	GSM6774077				13059	G4	LEC	TC	Lamp5	GSM7318979
	27312	L1	LEC	TC	Sncg	GSM6812249				3685	C1	FI	FC	Vip	GSM7228214				16202	H4	A46	FC	Vip	GSM7328248
	8977	D4	MTG	TC	Sncg	GSM6798613				9388	E4	MTG	TC	Lamp5	GSM5161097				18795	J1	V1C	OC	Lamp5	GSM6707420
	25352	L1	LEC	TC	Sncg	GSM6810052				15930	I1	LEC	TC	Lamp5	GSM6786420				18752	J1	V1C	OC	Sst	GSM6707061
	10305	E2	FI	FC	Sncg	GSM7213052				4437	C2	A44-A45	FC	Vip	GSM7303119				18806	J1	V1C	OC	Vip	GSM6707559
	27585	L1	LEC	TC	Sncg	GSM6812564				16334	I1	LEC	TC	Lamp5	GSM6786941				13782	H1	MEC	TC	Sst	GSM6368315
	26956	L1	LEC	TC	Sncg	GSM6811854				17060	I1	LEC	TC	Lamp5	GSM6787897				16005	H4	A46	FC	Vip	GSM7327085
	27422	L1	LEC	TC	Sncg	GSM6812384				9391	E4	MTG	TC	Sst	GSM5161135				13001	G4	LEC	TC	Vip	GSM7318678
	26656	L1	LEC	TC	Sncg	GSM6811515				9379	E4	MTG	TC	Vip	GSM5160997				1541	A4	A46	FC	Sst	GSM6374499
	25739	L1	LEC	TC	Sncg	GSM6810475				9368	E4	MTG	TC	Lamp5	GSM5160863				1556	A4	A46	FC	Sst	GSM6374560
	26699	L1	LEC	TC	Sncg	GSM6811562				9389	E4	MTG	TC	Lamp5	GSM5161118				11399	G1	S1C	PC	Pvalb	GSM6307855
	25608	L1	LEC	TC	Sncg	GSM6810330				16758	I1	LEC	TC	Lamp5	GSM6787529				12873	G4	LEC	TC	Vip	GSM7318027
	27134	L1	LEC	TC	Sncg	GSM6812052				20069	K1	M1C	FC	Pvalb	GSM6772401				18418	I3	MTG	TC	Pvalb	GSM7345689
	25818	L1	LEC	TC	Sncg	GSM6810561				66	A1	A5-A7	PC	Pvalb	GSM5422093				18913	J1	V1C	OC	Lamp5	GSM6708715
	24779	K1	FI	FC	Sncg	GSM6839392				16415	I1	LEC	TC	Pvalb	GSM6787078				1091	A3	FI	FC	Pvalb	GSM6370482
	16647	H3	A24	FC	Sncg	GSM6870489				9466	E4	MTG	TC	Sncg	GSM5161907				13274	G4	LEC	TC	Sst	GSM7320397
	25237	K1	FI	FC	Sncg	GSM6839888				3689	C1	FI	FC	Vip	GSM7228220				13276	G4	LEC	TC	Pvalb	GSM7320408
	23437	K1	FI	FC	Sncg	GSM6837950				20469	K1	M1C	FC	Pvalb	GSM6773000				12960	G4	LEC	TC	Sncg	GSM7318417
	27527	L1	LEC	TC	Sncg	GSM6812503				20543	K1	M1C	FC	Pvalb	GSM6773085				16033	H4	A46	FC	Lamp5	GSM7327286
	20449	J1	V1C	OC	Sncg	GSM6740270				9506	E4	MTG	TC	Vip	GSM5162460				15938	H4	A46	FC	Sst	GSM7326500
	26007	L1	LEC	TC	Sncg	GSM6810779				8831	E3	DGR-CA4Rpy	HIP	Lamp5	GSM5865694				16210	H4	A46	FC	Vip	GSM7328299
	24207	K1	FI	FC	Sncg	GSM6838780				17478	J1	MEC	TC	Lamp5	GSM6227131				18433	I3	MTG	TC	Vip	GSM7345911
	27505	L1	LEC	TC	Sncg	GSM6812478				20334	K1	M1C	FC	Pvalb	GSM6772798				18809	J1	V1C	OC	Lamp5	GSM6707574
	8967	D4	MTG	TC	Sncg	GSM6800396				21203	K1	M1C	FC	Pvalb	GSM6774016				13131	G4	LEC	TC	Vip	GSM7319598
	25350	L1	LEC	TC	Sncg	GSM6810050				21546	L1	M1C	FC	Sncg	GSM6780346				2527	B2	A44-A45	FC	Sncg	GSM6406065
	24987	K1	FI	FC	Sncg	GSM6839624				20782	K1	M1C	FC	Sst	GSM6773414				13285	G4	LEC	TC	Lamp5	GSM7320461
	20560	J1	V1C	OC	Sncg	GSM6740391				15138	I1	LEC	TC	Pvalb	GSM6785080				976	A3	FI	FC	Lamp5	GSM6369646
	8964	D4	MTG	TC	Sncg	GSM6798756				16759	I1	LEC	TC	Pvalb	GSM6787530				18864	J1	V1C	OC	Pvalb	GSM6708220
	25377	L1	LEC	TC	Sncg	GSM6810077				11681	F4	CA1R-CA2R-CA3R	HIP	Lamp5	GSM5867628				13155	G4	LEC	TC	Sst	GSM7319698
	27428	L1	LEC	TC	Sncg	GSM6812391				15726	I1	LEC	TC	Vip	GSM6786158				16182	H4	A46	FC	Vip	GSM7328142
	23824	K1	FI	FC	Sncg	GSM6838376				9400	E4	MTG	TC	Sst	GSM5161198				16131	H4	A46	FC	Sst	GSM7327782
	25553	L1	LEC	TC	Sncg	GSM6810270				14072	H2	S1C	PC	Vip	GSM5457603				18253	I3	MTG	TC	Pvalb	GSM7343588
	26201	L1	LEC	TC	Sncg	GSM6811008				16644	I1	LEC	TC	Lamp5	GSM6787396				12947	G4	LEC	TC	Sncg	GSM7318317
	8209	D3	A46	FC	Sncg	GSM6789232				16424	I1	LEC	TC	Vip	GSM6787095				18258	I3	MTG	TC	Pvalb	GSM7343614
	4134	C1	A5	PC	Sncg	GSM5408255				22093	L2	A1C	TC	Vip	GSM7292770				16113	H4	A46	FC	Sst	GSM7327685
	27353	L1	LEC	TC	Sncg	GSM6812294				659	A2	ITG	TC	Lamp5	GSM6169181				18249	I3	MTG	TC	Pvalb	GSM7343551
	25365	L1	LEC	TC	Sncg	GSM6810065				9541	E4	MTG	TC	Pvalb	GSM5163139				13320	G4	LEC	TC	Pvalb	GSM7320709
	8215	D3	A46	FC	Sncg	GSM6791346				15725	I1	LEC	TC	Pvalb	GSM6786157				15863	H4	A46	FC	Vip	GSM7326094
	8220	D3	A46	FC	Sncg	GSM6790012				16343	I1	LEC	TC	Pvalb	GSM6786952				18871	J1	V1C	OC	Sst	GSM6708304
	23057	K1	FI	FC	Sncg	GSM6837536				16704	I1	LEC	TC	Sst	GSM6787460				18776	J1	V1C	OC	Pvalb	GSM6707273
	27484	L1	LEC	TC	Sncg	GSM6812456				3674	C1	FI	FC	Lamp5	GSM7228188				13241	G4	LEC	TC	Sst	GSM7320137
	8211	D3	A46	FC	Sncg	GSM6790300				9468	E4	MTG	TC	Pvalb	GSM5161946				13073	G4	LEC	TC	Vip	GSM7319098
	25961	L1	LEC	TC	Sncg	GSM6810730				19897	K1	M1C	FC	Vip	GSM6772172				16199	H4	A46	FC	Pvalb	GSM7328237
	26114	L1	LEC	TC	Sncg	GSM6810903				19612	K1	M1C	FC	Pvalb	GSM6771801				12959	G4	LEC	TC	Pvalb	GSM7318404
	27474	L1	LEC	TC	Sncg	GSM6812445				9432	E4	MTG	TC	Vip	GSM5161400				12951	G4	LEC	TC	Lamp5	GSM7318351
	19774	J1	V1C	OC	Sncg	GSM6739515				39	A1	A5-A7	PC	Lamp5	GSM5421911				545	A2	A5-A7	PC	Vip	GSM6352837
	27747	L1	LEC	TC	Sncg	GSM6812748				16552	I1	LEC	TC	Vip	GSM6787263				13307	G4	LEC	TC	Sncg	GSM7320648
	8202	D3	A46	FC	Sncg	GSM6790000				16498	I1	LEC	TC	Lamp5	GSM6787206				15662	H3	A24	FC	Sst	GSM7339748
	20635	J1	V1C	OC	Sncg	GSM6740476				16218	I1	LEC	TC	Pvalb	GSM6786790				18803	J1	V1C	OC	Pvalb	GSM6707485
	25475	L1	LEC	TC	Sncg	GSM6810185				12172	G1	V1C	OC	Sncg	GSM6746512				1593	A4	A46	FC	Sncg	GSM6374676
	25537	L1	LEC	TC	Sncg	GSM6810253				9357	E4	MTG	TC	Sst	GSM5160625				18742	J1	V1C	OC	Sst	GSM6706951
	27433	L1	LEC	TC	Sncg	GSM6812396				15071	I1	LEC	TC	Sst	GSM6784999				12901	G4	LEC	TC	Vip	GSM7318157
	17374	H4	LEC	TC	Sncg	GSM7150352				20499	K1	M1C	FC	Vip	GSM6773034				12957	G4	LEC	TC	Vip	GSM7318390
	27229	L1	LEC	TC	Sncg	GSM6812153				15999	I1	LEC	TC	Pvalb	GSM6786500				15911	H4	A46	FC	Pvalb	GSM7326403
	8976	D4	MTG	TC	Sncg	GSM6798458				16402	I1	LEC	TC	Lamp5	GSM6787062				13160	G4	LEC	TC	Sncg	GSM7319707
	20585	J1	V1C	OC	Sncg	GSM6740418				19623	K1	M1C	FC	Vip	GSM6771815				13079	G4	LEC	TC	Vip	GSM7319184
	5113	C2	ITG	TC	Sncg	GSM6146303				16793	I1	LEC	TC	Vip	GSM6787572				18741	J1	V1C	OC	Sst	GSM6706941
	27045	L1	LEC	TC	Sncg	GSM6811951				20761	K1	M1C	FC	Vip	GSM6773386				1705	A4	A46	FC	Sst	GSM6376452
	22950	K1	FI	FC	Sncg	GSM6837422				13509	H1	A46	FC	Lamp5	GSM5121144				1558	A4	A46	FC	Vip	GSM6374564
	27879	L1	LEC	TC	Sncg	GSM6812900				12260	G1	V1C	OC	Lamp5	GSM6747918				13195	G4	LEC	TC	Lamp5	GSM7319944
	27338	L1	LEC	TC	Sncg	GSM6812278				20893	K1	M1C	FC	Pvalb	GSM6773570				991	A3	FI	FC	Lamp5	GSM6369710
	27468	L1	LEC	TC	Sncg	GSM6812437				21306	L1	M1C	FC	Pvalb	GSM6779398				1539	A4	A46	FC	Pvalb	GSM6374440
	8206	D3	A46	FC	Sncg	GSM6789149				16999	I1	LEC	TC	Pvalb	GSM6787831				11416	G1	S1C	PC	Lamp5	GSM6307914
	24167	K1	FI	FC	Sncg	GSM6838738				15657	I1	LEC	TC	Sncg	GSM6786039				21214	J3	A25	FC	Sst	GSM6343425
	26882	L1	LEC	TC	Sncg	GSM6811771				9545	E4	MTG	TC	Sst	GSM5163174				15605	H3	A24	FC	Pvalb	GSM7337307
	26053	L1	LEC	TC	Sncg	GSM6810833				16242	I1	LEC	TC	Sst	GSM6786823				13206	G4	LEC	TC	Lamp5	GSM7320004
	19757	J1	V1C	OC	Sncg	GSM6739496				19944	K1	M1C	FC	Pvalb	GSM6772229				18244	I3	MTG	TC	Sncg	GSM7343524
	25674	L1	LEC	TC	Sncg	GSM6810399				9436	E4	MTG	TC	Sst	GSM5161439				16102	H4	A46	FC	Sst	GSM7327604
	23622	K1	FI	FC	Sncg	GSM6838155				530	A2	ITG	TC	Pvalb	GSM6167918				18268	I3	MTG	TC	Pvalb	GSM7343762
	23116	K1	FI	FC	Sncg	GSM6837599				9455	E4	MTG	TC	Pvalb	GSM5161784				18888	J1	V1C	OC	Sst	GSM6708454
	24939	K1	FI	FC	Sncg	GSM6839566				9539	E4	MTG	TC	Sncg	GSM5163136				2532	B2	A44-A45	FC	Sst	GSM6406078
	23509	K1	FI	FC	Sncg	GSM6838028				21229	K1	M1C	FC	Sst	GSM6774056				18233	I3	MTG	TC	Vip	GSM7343455
	25174	K1	FI	FC	Sncg	GSM6839821				12298	G1	V1C	OC	Vip	GSM6748231				4008	C1	DGR	HIP	Sst	GSM6561861
	23263	K1	FI	FC	Sncg	GSM6837757				15019	I1	LEC	TC	Pvalb	GSM6784923				11417	G1	S1C	PC	Pvalb	GSM6307918
	19918	J1	V1C	OC	Sncg	GSM6739671				17067	I1	LEC	TC	Pvalb	GSM6787905				13659	H1	MEC	TC	Pvalb	GSM6367736
	22932	K1	FI	FC	Sncg	GSM6837403				20225	K1	M1C	FC	Vip	GSM6772599				12970	G4	LEC	TC	Vip	GSM7318451
	26186	L1	LEC	TC	Sncg	GSM6810992				12186	G1	V1C	OC	Vip	GSM6746696				18748	J1	V1C	OC	Vip	GSM6707000
	21484	J1	V1C	OC	Sncg	GSM6741472				16863	I1	LEC	TC	Vip	GSM6787668				18791	J1	V1C	OC	Sncg	GSM6707382
	8213	D3	A46	FC	Sncg	GSM6791275				9459	E4	MTG	TC	Lamp5	GSM5161851				13026	G4	LEC	TC	Vip	GSM7318763
	20819	J1	V1C	OC	Sncg	GSM6740682				21434	L1	M1C	FC	Sst	GSM6779931				18884	J1	V1C	OC	Pvalb	GSM6708420
	24827	K1	FI	FC	Sncg	GSM6839443				19772	K1	M1C	FC	Vip	GSM6772008				12859	G4	LEC	TC	Pvalb	GSM7317962
	8978	D4	MTG	TC	Sncg	GSM6799152				19392	J3	A24	FC	Pvalb	GSM6874096				12974	G4	LEC	TC	Sst	GSM7318490
	27105	L1	LEC	TC	Sncg	GSM6812019				15495	I1	LEC	TC	Pvalb	GSM6785788				15907	H4	A46	FC	Sst	GSM7326353
	23331	K1	FI	FC	Sncg	GSM6837834				16469	I1	LEC	TC	Sncg	GSM6787151				5312	C4	CA1R	HIP	Lamp5	GSM6556911
	8972	D4	MTG	TC	Sncg	GSM6798622				19677	K1	M1C	FC	Sst	GSM6771883				18332	I3	MTG	TC	Sncg	GSM7344586
	27606	L1	LEC	TC	Sncg	GSM6812590				12275	G1	V1C	OC	Sst	GSM6748054				12902	G4	LEC	TC	Sncg	GSM7318160
	21642	J1	V1C	OC	Sncg	GSM6741651				33	A1	A5-A7	PC	Sst	GSM5421876				12956	G4	LEC	TC	Lamp5	GSM7318389
	24643	K1	FI	FC	Sncg	GSM6839253				21118	K1	M1C	FC	Vip	GSM6773886				20886	J2	A24	FC	Vip	GSM6363739
	26179	L1	LEC	TC	Sncg	GSM6810984				9487	E4	MTG	TC	Vip	GSM5162223				533	A2	A5-A7	PC	Sst	GSM6352723
	8219	D3	A46	FC	Sncg	GSM6789454				9534	E4	MTG	TC	Vip	GSM5162982				18794	J1	V1C	OC	Pvalb	GSM6707406
	24913	K1	FI	FC	Sncg	GSM6839538				16150	I1	LEC	TC	Lamp5	GSM6786696				16183	H4	A46	FC	Pvalb	GSM7328155
	23306	K1	FI	FC	Sncg	GSM6837806				14027	H2	S1C	PC	Pvalb	GSM5457380				18265	I3	MTG	TC	Pvalb	GSM7343705
	26025	L1	LEC	TC	Sncg	GSM6810800				22526	L2	A1C	TC	Sst	GSM7294619				16035	H4	A46	FC	Pvalb	GSM7327300
	16325	H3	A24	FC	Sncg	GSM6869219				15136	I1	LEC	TC	Vip	GSM6785078				18945	J1	V1C	OC	Pvalb	GSM6709068
	8979	D4	MTG	TC	Sncg	GSM6799326				19949	K1	M1C	FC	Lamp5	GSM6772235				18349	I3	MTG	TC	Lamp5	GSM7344788
	8973	D4	MTG	TC	Sncg	GSM6799021				21086	K1	M1C	FC	Lamp5	GSM6773847				12994	G4	LEC	TC	Vip	GSM7318638
	8969	D4	MTG	TC	Sncg	GSM6798635				9492	E4	MTG	TC	Sncg	GSM5162286				16015	H4	A46	FC	Lamp5	GSM7327163
	25621	L1	LEC	TC	Sncg	GSM6810343				16824	I1	LEC	TC	Sst	GSM6787617				20785	J2	A24	FC	Vip	GSM6362176
	17256	H4	LEC	TC	Sncg	GSM7150175				11738	F4	CA1R-CA2R-CA3R	HIP	Vip	GSM5868247				18901	J1	V1C	OC	Pvalb	GSM6708576
	27941	L1	LEC	TC	Sncg	GSM6812970				14107	H2	S1C	PC	Vip	GSM5457949				12823	G4	LEC	TC	Lamp5	GSM7317810
	25704	L1	LEC	TC	Sncg	GSM6810435				20046	K1	M1C	FC	Lamp5	GSM6772373				18854	J1	V1C	OC	Pvalb	GSM6708079
	26100	L1	LEC	TC	Sncg	GSM6810889				16255	I1	LEC	TC	Lamp5	GSM6786840				15841	H4	A46	FC	Pvalb	GSM7325949
	27887	L1	LEC	TC	Sncg	GSM6812909				19957	K1	M1C	FC	Pvalb	GSM6772244				4026	C1	DGR	HIP	Lamp5	GSM6563182
	19984	J1	V1C	OC	Sncg	GSM6739747				20220	K1	M1C	FC	Lamp5	GSM6772593				13097	G4	LEC	TC	Vip	GSM7319310
	16826	H4	LEC	TC	Sncg	GSM7149290				16663	I1	LEC	TC	Pvalb	GSM6787415				18853	J1	V1C	OC	Vip	GSM6708060
	25013	K1	FI	FC	Sncg	GSM6839651				3683	C1	FI	FC	Lamp5	GSM7228209				11376	G1	S1C	PC	Vip	GSM6307712
	25792	L1	LEC	TC	Sncg	GSM6810534				21240	K1	M1C	FC	Sst	GSM6774073				8195	E1	A19	OC	Lamp5	GSM6330345
	27447	L1	LEC	TC	Sncg	GSM6812411				14114	H2	S1C	PC	Lamp5	GSM5457989				14489	H2	Pro	OC	Pvalb	GSM6676610
	24730	K1	FI	FC	Sncg	GSM6839341				15922	I1	LEC	TC	Pvalb	GSM6786407				14438	H2	Pro	OC	Sst	GSM6676302
	19931	J1	V1C	OC	Sncg	GSM6739685				19879	K1	M1C	FC	Sst	GSM6772154				20826	J2	A24	FC	Vip	GSM6362489
	20423	J1	V1C	OC	Sncg	GSM6740241				9490	E4	MTG	TC	Vip	GSM5162249				12869	G4	LEC	TC	Sncg	GSM7318018
	8966	D4	MTG	TC	Sncg	GSM6800168				11233	F3	CA1C-CA2C-CA3C-DGC-CA4C	HIP	Pvalb	GSM5998463				13102	G4	LEC	TC	Lamp5	GSM7319322
	27520	L1	LEC	TC	Sncg	GSM6812494				17116	I1	LEC	TC	Sncg	GSM6787964				18743	J1	V1C	OC	Sst	GSM6706957
	23604	K1	FI	FC	Sncg	GSM6838134				20193	K1	M1C	FC	Sst	GSM6772556				11430	G1	S1C	PC	Pvalb	GSM6307978
	21591	J1	V1C	OC	Sncg	GSM6741591				9472	E4	MTG	TC	Sst	GSM5162036				16044	H4	A46	FC	Pvalb	GSM7327326
	24440	K1	FI	FC	Sncg	GSM6839028				16383	I1	LEC	TC	Sncg	GSM6787001				18350	I3	MTG	TC	Vip	GSM7344792
	4143	C1	A5	PC	Sncg	GSM5409027				20273	K1	M1C	FC	Vip	GSM6772664				14476	H2	Pro	OC	Sst	GSM6676536
	24470	K1	FI	FC	Sncg	GSM6839063				11687	F4	CA1R-CA2R-CA3R	HIP	Vip	GSM5867661				20831	J2	A24	FC	Pvalb	GSM6362624
	24626	K1	FI	FC	Sncg	GSM6839234				9334	E4	MTG	TC	Vip	GSM5160288				13100	G4	LEC	TC	Sncg	GSM7319316
	24683	K1	FI	FC	Sncg	GSM6839293				9454	E4	MTG	TC	Vip	GSM5161783				18309	I3	MTG	TC	Sncg	GSM7344305
	23817	K1	FI	FC	Sncg	GSM6838367				16649	I1	LEC	TC	Vip	GSM6787401				15858	H4	A46	FC	Lamp5	GSM7326062
	25706	L1	LEC	TC	Sncg	GSM6810437				19412	J3	A24	FC	Pvalb	GSM6874459				16024	H4	A46	FC	Sst	GSM7327227
	16408	H3	A24	FC	Sncg	GSM6869552				20523	K1	M1C	FC	Pvalb	GSM6773061				135	A1	MTG	TC	Sst	GSM6336184
	8968	D4	MTG	TC	Sncg	GSM6798326				20665	K1	M1C	FC	Pvalb	GSM6773256				13178	G4	LEC	TC	Sncg	GSM7319836
	27103	L1	LEC	TC	Sncg	GSM6812017				9387	E4	MTG	TC	Sncg	GSM5161088				13339	G4	LEC	TC	Vip	GSM7320790
	17253	H4	LEC	TC	Sncg	GSM7150171				9483	E4	MTG	TC	Sst	GSM5162164				13217	G4	LEC	TC	Pvalb	GSM7320045
	27593	L1	LEC	TC	Sncg	GSM6812575				21729	L1	M1C	FC	Vip	GSM6781100				2539	B2	A44-A45	FC	Sst	GSM6406127
	24314	K1	FI	FC	Sncg	GSM6838894				9442	E4	MTG	TC	Vip	GSM5161602				15871	H4	A46	FC	Sst	GSM7326141
	25497	L1	LEC	TC	Sncg	GSM6810208				9477	E4	MTG	TC	Vip	GSM5162099				18826	J1	V1C	OC	Vip	GSM6707794
	20931	J1	V1C	OC	Sncg	GSM6740821				19748	K1	M1C	FC	Lamp5	GSM6771977				18883	J1	V1C	OC	Pvalb	GSM6708417
	14967	H1	Pro	OC	Sncg	GSM5442968				9469	E4	MTG	TC	Lamp5	GSM5161968				12986	G4	LEC	TC	Lamp5	GSM7318584
	4148	C1	A5	PC	Sncg	GSM5410177				20101	K1	M1C	FC	Sst	GSM6772444				18402	I3	MTG	TC	Pvalb	GSM7345507
	27676	L1	LEC	TC	Sncg	GSM6812664				21751	L1	M1C	FC	Sst	GSM6781264				10682	F2	ITG	TC	Sst	GSM6357938
	25702	L1	LEC	TC	Sncg	GSM6810432				8856	E3	DGR-CA4Rpy	HIP	Lamp5	GSM5865940				20765	J2	A24	FC	Pvalb	GSM6361957
	24438	K1	FI	FC	Sncg	GSM6839026				15799	I1	LEC	TC	Pvalb	GSM6786244				18257	I3	MTG	TC	Sst	GSM7343611
	22905	K1	FI	FC	Sncg	GSM6837376				16689	I1	LEC	TC	Sncg	GSM6787442				13168	G4	LEC	TC	Lamp5	GSM7319756
	16859	H4	LEC	TC	Sncg	GSM7149327				9424	E4	MTG	TC	Vip	GSM5161339				18770	J1	V1C	OC	Sst	GSM6707211
	27876	L1	LEC	TC	Sncg	GSM6812896				16741	I1	LEC	TC	Vip	GSM6787508				14397	H2	Pro	OC	Sst	GSM6676028
	23867	K1	FI	FC	Sncg	GSM6838423				20356	K1	M1C	FC	Lamp5	GSM6772829				5357	C4	CA1R	HIP	Lamp5	GSM6558872
	27825	L1	LEC	TC	Sncg	GSM6812839				6412	D2	A46	FC	Pvalb	GSM6795903				13082	G4	LEC	TC	Vip	GSM7319210
	10291	E2	FI	FC	Sncg	GSM7211899				9496	E4	MTG	TC	Lamp5	GSM5162411				21294	J3	A25	FC	Sncg	GSM6343824
	20595	J1	V1C	OC	Sncg	GSM6740429				15143	I1	LEC	TC	Vip	GSM6785085				18423	I3	MTG	TC	Lamp5	GSM7345774
	27260	L1	LEC	TC	Sncg	GSM6812190				16664	I1	LEC	TC	Vip	GSM6787416				15893	H4	A46	FC	Lamp5	GSM7326256
	27446	L1	LEC	TC	Sncg	GSM6812410				15953	I1	LEC	TC	Lamp5	GSM6786445				15812	H4	A46	FC	Sst	GSM7325797
	27467	L1	LEC	TC	Sncg	GSM6812436				16742	I1	LEC	TC	Lamp5	GSM6787509				12941	G4	LEC	TC	Sncg	GSM7318300
	27774	L1	LEC	TC	Sncg	GSM6812784				16047	I1	LEC	TC	Pvalb	GSM6786574				13016	G4	LEC	TC	Sncg	GSM7318726
	24495	K1	FI	FC	Sncg	GSM6839091				16262	I1	LEC	TC	Sst	GSM6786850				10591	F2	ITG	TC	Lamp5	GSM6356461
	8975	D4	MTG	TC	Sncg	GSM6800203				3688	C1	FI	FC	Lamp5	GSM7228219				16951	I1	A1C	TC	Vip	GSM6313606
	20399	J1	V1C	OC	Sncg	GSM6740216				19611	K1	M1C	FC	Pvalb	GSM6771800				16189	H4	A46	FC	Sst	GSM7328180
	22253	J1	V1C	OC	Sncg	GSM6742383				21523	L1	M1C	FC	Sst	GSM6780244				18952	J1	V1C	OC	Sst	GSM6709114
	26096	L1	LEC	TC	Sncg	GSM6810878				15558	I1	LEC	TC	Vip	GSM6785892				13826	H1	MEC	TC	Lamp5	GSM6368591
	4187	C1	A5	PC	Sst	GSM5408334				14068	H2	S1C	PC	Pvalb	GSM5457591				12936	G4	LEC	TC	Lamp5	GSM7318279
	8300	D3	A46	FC	Sst	GSM6791432				9517	E4	MTG	TC	Pvalb	GSM5162663				15926	H4	A46	FC	Pvalb	GSM7326456
	16691	H3	A24	FC	Sst	GSM6870574				9497	E4	MTG	TC	Sst	GSM5162412				12851	G4	LEC	TC	Sncg	GSM7317926
	10368	E2	FI	FC	Sst	GSM7213265				9508	E4	MTG	TC	Sst	GSM5162470				13223	G4	LEC	TC	Pvalb	GSM7320073
	26567	L1	LEC	TC	Sst	GSM6811416				9465	E4	MTG	TC	Vip	GSM5161899				13729	H1	MEC	TC	Lamp5	GSM6368009
	16701	H3	A24	FC	Sst	GSM6870594				15463	I1	LEC	TC	Vip	GSM6785747				15915	H4	A46	FC	Pvalb	GSM7326415
	26402	L1	LEC	TC	Sst	GSM6811238				19916	K1	M1C	FC	Lamp5	GSM6772194				992	A3	FI	FC	Vip	GSM6369711
	26441	L1	LEC	TC	Sst	GSM6811282				8807	E3	DGR-CA4Rpy	HIP	Lamp5	GSM5863024				546	A2	A5-A7	PC	Sst	GSM6352842
	25826	L1	LEC	TC	Sst	GSM6810569				4413	C2	A44-A45	FC	Pvalb	GSM7302965				22155	K1	CA1C	HIP	Pvalb	GSM6521816
	1245	A3	CA1C	HIP	Sst	GSM6159469				16108	I1	LEC	TC	Sncg	GSM6786644				13255	G4	LEC	TC	Sst	GSM7320222
	27171	L1	LEC	TC	Sst	GSM6812093				9447	E4	MTG	TC	Sst	GSM5161661				12972	G4	LEC	TC	Vip	GSM7318462
	26599	L1	LEC	TC	Sst	GSM6811449				15394	I1	LEC	TC	Sst	GSM6785641				14490	H2	Pro	OC	Sst	GSM6676628
	26324	L1	LEC	TC	Sst	GSM6811155				17934	J1	MEC	TC	Sst	GSM6228347				1031	A3	FI	FC	Pvalb	GSM6370074
	26626	L1	LEC	TC	Sst	GSM6811481				9452	E4	MTG	TC	Lamp5	GSM5161746				11586	G1	S1C	PC	Vip	GSM6309058
	26802	L1	LEC	TC	Sst	GSM6811683				9484	E4	MTG	TC	Lamp5	GSM5162178				20877	J2	A24	FC	Vip	GSM6363578
	26447	L1	LEC	TC	Sst	GSM6811288				21441	L1	M1C	FC	Sncg	GSM6779951				13182	G4	LEC	TC	Pvalb	GSM7319860
	27215	L1	LEC	TC	Sst	GSM6812139				9431	E4	MTG	TC	Sst	GSM5161389				13139	G4	LEC	TC	Vip	GSM7319620
	27013	L1	LEC	TC	Sst	GSM6811917				19982	K1	M1C	FC	Vip	GSM6772288				13000	G4	LEC	TC	Lamp5	GSM7318677
	26443	L1	LEC	TC	Sst	GSM6811284				17437	J1	MEC	TC	Sncg	GSM6227058				13280	G4	LEC	TC	Vip	GSM7320437
	26368	L1	LEC	TC	Sst	GSM6811204				20311	K1	M1C	FC	Sst	GSM6772764				16018	H4	A46	FC	Sst	GSM7327187
	27279	L1	LEC	TC	Sst	GSM6812212				15471	I1	LEC	TC	Pvalb	GSM6785757				10596	F2	ITG	TC	Vip	GSM6356490
	26435	L1	LEC	TC	Sst	GSM6811275				3686	C1	FI	FC	Sncg	GSM7228216				21284	J3	A25	FC	Sncg	GSM6343784
	26530	L1	LEC	TC	Sst	GSM6811376				9395	E4	MTG	TC	Sst	GSM5161168				1692	A4	A46	FC	Sst	GSM6376132
	26519	L1	LEC	TC	Sst	GSM6811365				16012	I1	LEC	TC	Sst	GSM6786518				18877	J1	V1C	OC	Pvalb	GSM6708363
	26620	L1	LEC	TC	Sst	GSM6811475				17512	J1	MEC	TC	Sst	GSM6227205				13197	G4	LEC	TC	Vip	GSM7319972
	24218	K1	FI	FC	Sst	GSM6838791				20989	K1	M1C	FC	Vip	GSM6773710				12995	G4	LEC	TC	Pvalb	GSM7318641
	25940	L1	LEC	TC	Sst	GSM6810706				14042	H2	S1C	PC	Vip	GSM5457430				12828	G4	LEC	TC	Sncg	GSM7317821
	26537	L1	LEC	TC	Sst	GSM6811384				19795	K1	M1C	FC	Lamp5	GSM6772042				12983	G4	LEC	TC	Sst	GSM7318542
	26778	L1	LEC	TC	Sst	GSM6811651				21096	K1	M1C	FC	Sst	GSM6773857				18999	J1	V1C	OC	Sst	GSM6709579
	26434	L1	LEC	TC	Sst	GSM6811273				9427	E4	MTG	TC	Vip	GSM5161357				983	A3	FI	FC	Pvalb	GSM6369667
	25913	L1	LEC	TC	Sst	GSM6810676				17352	J1	MEC	TC	Vip	GSM6226899				11395	G1	S1C	PC	Sncg	GSM6307825
	26321	L1	LEC	TC	Sst	GSM6811151				15966	I1	LEC	TC	Lamp5	GSM6786460				13321	G4	LEC	TC	Lamp5	GSM7320710
	27300	L1	LEC	TC	Sst	GSM6812237				15482	I1	LEC	TC	Pvalb	GSM6785770				13302	G4	LEC	TC	Sncg	GSM7320600
	26565	L1	LEC	TC	Sst	GSM6811414				21606	L1	M1C	FC	Sncg	GSM6780539				16162	H4	A46	FC	Pvalb	GSM7328049
	26596	L1	LEC	TC	Sst	GSM6811446				15920	I1	LEC	TC	Sncg	GSM6786405				13085	G4	LEC	TC	Lamp5	GSM7319215
	24170	K1	FI	FC	Sst	GSM6838741				9335	E4	MTG	TC	Sst	GSM5160291				12910	G4	LEC	TC	Pvalb	GSM7318180
	26343	L1	LEC	TC	Sst	GSM6811175				9489	E4	MTG	TC	Vip	GSM5162234				13200	G4	LEC	TC	Vip	GSM7319985
	26362	L1	LEC	TC	Sst	GSM6811197				15832	I1	LEC	TC	Lamp5	GSM6786284				8202	E1	A19	OC	Vip	GSM6330412
	27286	L1	LEC	TC	Sst	GSM6812219				9422	E4	MTG	TC	Sncg	GSM5161337				5368	C4	CA1R	HIP	Pvalb	GSM6559536
	26563	L1	LEC	TC	Sst	GSM6811411				21730	L1	M1C	FC	Sst	GSM6781111				16167	H4	A46	FC	Pvalb	GSM7328069
	26808	L1	LEC	TC	Sst	GSM6811689				14047	H2	S1C	PC	Vip	GSM5457443				16198	H4	A46	FC	Sst	GSM7328234
	25980	L1	LEC	TC	Sst	GSM6810751				18572	J2	M1C	FC	Lamp5	GSM5152252				138	A1	MTG	TC	Sncg	GSM6336198
	26494	L1	LEC	TC	Sst	GSM6811339				20059	K1	M1C	FC	Sst	GSM6772389				12933	G4	LEC	TC	Pvalb	GSM7318264
	26231	L1	LEC	TC	Sst	GSM6811044				16491	I1	LEC	TC	Lamp5	GSM6787179				13335	G4	LEC	TC	Sncg	GSM7320778
	27266	L1	LEC	TC	Sst	GSM6812196				21213	K1	M1C	FC	Pvalb	GSM6774031				1578	A4	A46	FC	Vip	GSM6374628
	25664	L1	LEC	TC	Sst	GSM6810389				15901	I1	LEC	TC	Pvalb	GSM6786382				18966	J1	V1C	OC	Vip	GSM6709220
	27220	L1	LEC	TC	Sst	GSM6812144				11669	F4	CA1R-CA2R-CA3R	HIP	Sst	GSM5867553				15924	H4	A46	FC	Sst	GSM7326440
	16370	H3	A24	FC	Sst	GSM6869352				15795	I1	LEC	TC	Vip	GSM6786239				15672	H3	A24	FC	Pvalb	GSM7339949
	26897	L1	LEC	TC	Sst	GSM6811786				15469	I1	LEC	TC	Lamp5	GSM6785755				15829	H4	A46	FC	Pvalb	GSM7325898
	26538	L1	LEC	TC	Sst	GSM6811385				21298	L1	M1C	FC	Pvalb	GSM6779374				18732	J1	V1C	OC	Sst	GSM6706827
	27005	L1	LEC	TC	Sst	GSM6811909				20881	K1	M1C	FC	Sncg	GSM6773556				13318	G4	LEC	TC	Sst	GSM7320704
	26774	L1	LEC	TC	Sst	GSM6811647				15829	I1	LEC	TC	Vip	GSM6786281				13020	G4	LEC	TC	Vip	GSM7318740
	26839	L1	LEC	TC	Sst	GSM6811724				20587	K1	M1C	FC	Vip	GSM6773143				12900	G4	LEC	TC	Vip	GSM7318155
	26261	L1	LEC	TC	Sst	GSM6811078				20812	K1	M1C	FC	Vip	GSM6773460				18844	J1	V1C	OC	Sst	GSM6707991
	26857	L1	LEC	TC	Sst	GSM6811743				9485	E4	MTG	TC	Vip	GSM5162196				15606	H3	A24	FC	Vip	GSM7337433
	26891	L1	LEC	TC	Sst	GSM6811780				9332	E4	MTG	TC	Lamp5	GSM5160228				11579	G1	S1C	PC	Lamp5	GSM6309036
	26946	L1	LEC	TC	Sst	GSM6811842				3774	C1	FI	FC	Pvalb	GSM7229043				21280	J3	A25	FC	Vip	GSM6343772
	26803	L1	LEC	TC	Sst	GSM6811684				19513	J3	A24	FC	Pvalb	GSM6876145				12868	G4	LEC	TC	Vip	GSM7318015
	25795	L1	LEC	TC	Sst	GSM6810537				20437	K1	M1C	FC	Pvalb	GSM6772959				13194	G4	LEC	TC	Lamp5	GSM7319938
	25565	L1	LEC	TC	Sst	GSM6810283				15018	I1	LEC	TC	Sst	GSM6784922				5364	C4	CA1R	HIP	Sst	GSM6559169
	25833	L1	LEC	TC	Sst	GSM6810576				11744	F4	CA1R-CA2R-CA3R	HIP	Lamp5	GSM5868691				15670	H3	A24	FC	Lamp5	GSM7339921
	26323	L1	LEC	TC	Sst	GSM6811154				16181	I1	LEC	TC	Lamp5	GSM6786740				15914	H4	A46	FC	Vip	GSM7326412
	25797	L1	LEC	TC	Sst	GSM6810539				16896	I1	LEC	TC	Lamp5	GSM6787713				18429	I3	MTG	TC	Sst	GSM7345851
	26332	L1	LEC	TC	Sst	GSM6811164				17114	I1	LEC	TC	Lamp5	GSM6787962				13161	G4	LEC	TC	Sncg	GSM7319712
	26965	L1	LEC	TC	Sst	GSM6811868				21397	L1	M1C	FC	Sst	GSM6779774				12925	G4	LEC	TC	Vip	GSM7318237
	27225	L1	LEC	TC	Sst	GSM6812149				21463	L1	M1C	FC	Sst	GSM6780017				5309	C4	CA1R	HIP	Lamp5	GSM6556898
	26835	L1	LEC	TC	Sst	GSM6811720				22009	L2	A1C	TC	Sst	GSM7292506				16200	H4	A46	FC	Lamp5	GSM7328238
	24100	K1	FI	FC	Sst	GSM6838667				19654	K1	M1C	FC	Pvalb	GSM6771852				15814	H4	A46	FC	Sst	GSM7325809
	26399	L1	LEC	TC	Sst	GSM6811235				20692	K1	M1C	FC	Pvalb	GSM6773291				18733	J1	V1C	OC	Sst	GSM6706831
	26445	L1	LEC	TC	Sst	GSM6811286				16048	I1	LEC	TC	Pvalb	GSM6786575				18768	J1	V1C	OC	Vip	GSM6707204
	26583	L1	LEC	TC	Sst	GSM6811432				3718	C1	FI	FC	Vip	GSM7228416				13205	G4	LEC	TC	Sncg	GSM7320000
	16359	H3	A24	FC	Sst	GSM6869319				19833	K1	M1C	FC	Vip	GSM6772096				12903	G4	LEC	TC	Vip	GSM7318162
	25972	L1	LEC	TC	Sst	GSM6810743				21504	L1	M1C	FC	Pvalb	GSM6780182				18421	I3	MTG	TC	Sst	GSM7345766
	25798	L1	LEC	TC	Sst	GSM6810540				19394	J3	A24	FC	Sncg	GSM6874128				13294	G4	LEC	TC	Pvalb	GSM7320514
	26451	L1	LEC	TC	Sst	GSM6811293				15081	I1	LEC	TC	Sst	GSM6785012				18927	J1	V1C	OC	Lamp5	GSM6708855
	24977	K1	FI	FC	Sst	GSM6839612				19882	K1	M1C	FC	Vip	GSM6772157				2519	B2	A44-A45	FC	Pvalb	GSM6406045
	27210	L1	LEC	TC	Sst	GSM6812134				16093	I1	LEC	TC	Vip	GSM6786624				18910	J1	V1C	OC	Sst	GSM6708691
	26393	L1	LEC	TC	Sst	GSM6811229				22408	L2	A1C	TC	Sst	GSM7294264				5	A1	MTG	TC	Sst	GSM6333557
	26934	L1	LEC	TC	Sst	GSM6811830				16362	I1	LEC	TC	Lamp5	GSM6786975				973	A3	FI	FC	Sncg	GSM6369627
	24945	K1	FI	FC	Sst	GSM6839573				9528	E4	MTG	TC	Sncg	GSM5162863				18382	I3	MTG	TC	Sst	GSM7345163
	27623	L1	LEC	TC	Sst	GSM6812609				20765	K1	M1C	FC	Pvalb	GSM6773391				18747	J1	V1C	OC	Vip	GSM6706994
	21274	J1	V1C	OC	Sst	GSM6741207				16441	I1	LEC	TC	Sst	GSM6787113				12393	G2	M1C	FC	Vip	GSM6316442
	8247	D3	A46	FC	Sst	GSM6791866				61	A1	A5-A7	PC	Vip	GSM5422075				18916	J1	V1C	OC	Pvalb	GSM6708741
	22899	K1	FI	FC	Sst	GSM6837368				15987	I1	LEC	TC	Vip	GSM6786485				12980	G4	LEC	TC	Lamp5	GSM7318533
	24220	K1	FI	FC	Sst	GSM6838793				15163	I1	LEC	TC	Vip	GSM6785110				18344	I3	MTG	TC	Sst	GSM7344721
	25461	L1	LEC	TC	Sst	GSM6810171				9533	E4	MTG	TC	Lamp5	GSM5162949				13277	G4	LEC	TC	Lamp5	GSM7320411
	25888	L1	LEC	TC	Sst	GSM6810647				9495	E4	MTG	TC	Pvalb	GSM5162403				18410	I3	MTG	TC	Pvalb	GSM7345594
	26831	L1	LEC	TC	Sst	GSM6811716				12243	G1	V1C	OC	Sst	GSM6747640				1676	A4	A46	FC	Sst	GSM6375547
	26603	L1	LEC	TC	Sst	GSM6811455				15855	I1	LEC	TC	Vip	GSM6786310				14404	H2	Pro	OC	Vip	GSM6676069
	27160	L1	LEC	TC	Sst	GSM6812082				20372	K1	M1C	FC	Lamp5	GSM6772851				12985	G4	LEC	TC	Vip	GSM7318582
	26555	L1	LEC	TC	Sst	GSM6811403				20906	K1	M1C	FC	Pvalb	GSM6773587				12907	G4	LEC	TC	Lamp5	GSM7318170
	27684	L1	LEC	TC	Sst	GSM6812673				21668	L1	M1C	FC	Vip	GSM6780877				4022	C1	DGR	HIP	Lamp5	GSM6563145
	4183	C1	A5	PC	Sst	GSM5408294				9399	E4	MTG	TC	Pvalb	GSM5161190				18956	J1	V1C	OC	Vip	GSM6709126
	16343	H3	A24	FC	Sst	GSM6869269				15735	I1	LEC	TC	Vip	GSM6786169				3989	C1	DGR	HIP	Lamp5	GSM6561332
	26335	L1	LEC	TC	Sst	GSM6811167				8851	E3	DGR-CA4Rpy	HIP	Lamp5	GSM5865876				13039	G4	LEC	TC	Sst	GSM7318808
	25869	L1	LEC	TC	Sst	GSM6810622				21003	K1	M1C	FC	Vip	GSM6773731				13119	G4	LEC	TC	Sst	GSM7319400
	25946	L1	LEC	TC	Sst	GSM6810714				16443	I1	LEC	TC	Pvalb	GSM6787115				15896	H4	A46	FC	Pvalb	GSM7326265
	16302	H3	A24	FC	Sst	GSM6869162				19765	K1	M1C	FC	Sst	GSM6771999				18292	I3	MTG	TC	Sst	GSM7344042
	24235	K1	FI	FC	Sst	GSM6838808				21468	L1	M1C	FC	Vip	GSM6780056				15898	H4	A46	FC	Lamp5	GSM7326284
	27154	L1	LEC	TC	Sst	GSM6812076				5533	C4	CA1C-CA2C-CA3C-DGC-CA4C	HIP	Vip	GSM6003849				15979	H4	A46	FC	Sst	GSM7326775
	25844	L1	LEC	TC	Sst	GSM6810591				14035	H2	S1C	PC	Vip	GSM5457416				13222	G4	LEC	TC	Lamp5	GSM7320072
	8303	D3	A46	FC	Sst	GSM6790431				9524	E4	MTG	TC	Vip	GSM5162832				13262	G4	LEC	TC	Vip	GSM7320257
	27000	L1	LEC	TC	Sst	GSM6811904				11639	F4	CA1R-CA2R-CA3R	HIP	Lamp5	GSM5866939				1587	A4	A46	FC	Sst	GSM6374654
	27643	L1	LEC	TC	Sst	GSM6812629				19397	J3	A24	FC	Pvalb	GSM6874200				1576	A4	A46	FC	Sst	GSM6374625
	26315	L1	LEC	TC	Sst	GSM6811145				19401	J3	A24	FC	Sst	GSM6874237				12904	G4	LEC	TC	Vip	GSM7318164
	25883	L1	LEC	TC	Sst	GSM6810638				2900	B4	V1C	OC	Sst	GSM7143442				5329	C4	CA1R	HIP	Lamp5	GSM6557808
	26976	L1	LEC	TC	Sst	GSM6811879				9336	E4	MTG	TC	Sst	GSM5160330				14563	H2	Pro	OC	Vip	GSM6677618
	23155	K1	FI	FC	Sst	GSM6837639				9406	E4	MTG	TC	Sst	GSM5161227				15855	H4	A46	FC	Sst	GSM7326053
	24188	K1	FI	FC	Sst	GSM6838760				9552	E4	MTG	TC	Vip	GSM5163218				5354	C4	CA1R	HIP	Sncg	GSM6558849
	8250	D3	A46	FC	Sst	GSM6790051				11763	F4	CA1R-CA2R-CA3R	HIP	Lamp5	GSM5869544				18875	J1	V1C	OC	Sst	GSM6708330
	23487	K1	FI	FC	Sst	GSM6838005				21933	L2	A1C	TC	Lamp5	GSM7292324				16101	H4	A46	FC	Sst	GSM7327601
	27029	L1	LEC	TC	Sst	GSM6811934				3699	C1	FI	FC	Sst	GSM7228272				10730	F2	ITG	TC	Vip	GSM6358840
	27209	L1	LEC	TC	Sst	GSM6812133				21633	L1	M1C	FC	Sst	GSM6780701				13343	G4	LEC	TC	Vip	GSM7320874
	24350	K1	FI	FC	Sst	GSM6838932				9550	E4	MTG	TC	Sst	GSM5163210				13263	G4	LEC	TC	Lamp5	GSM7320264
	24969	K1	FI	FC	Sst	GSM6839604				21564	L1	M1C	FC	Pvalb	GSM6780425				8	A1	MTG	TC	Vip	GSM6333569
	26678	L1	LEC	TC	Sst	GSM6811540				9501	E4	MTG	TC	Pvalb	GSM5162427				18861	J1	V1C	OC	Sst	GSM6708199
	9021	D4	MTG	TC	Sst	GSM6799570				17059	I1	LEC	TC	Sncg	GSM6787896				16184	H4	A46	FC	Sncg	GSM7328162
	25041	K1	FI	FC	Sst	GSM6839680				9356	E4	MTG	TC	Sst	GSM5160621				155	A1	MTG	TC	Sst	GSM6336299
	27034	L1	LEC	TC	Sst	GSM6811939				9461	E4	MTG	TC	Sst	GSM5161863				968	A3	FI	FC	Vip	GSM6369293
	27562	L1	LEC	TC	Sst	GSM6812541				21652	L1	M1C	FC	Pvalb	GSM6780779				13141	G4	LEC	TC	Sst	GSM7319632
	23500	K1	FI	FC	Sst	GSM6838019				14053	H2	S1C	PC	Sst	GSM5457469				982	A3	FI	FC	Lamp5	GSM6369664
	24185	K1	FI	FC	Sst	GSM6838757				2423	B2	A19	OC	Vip	GSM7194109				18960	J1	V1C	OC	Vip	GSM6709182
	26522	L1	LEC	TC	Sst	GSM6811368				3024	B4	V1C	OC	Vip	GSM7194812				14616	H2	Pro	OC	Lamp5	GSM6678298
	27143	L1	LEC	TC	Sst	GSM6812063				19855	K1	M1C	FC	Pvalb	GSM6772121				19020	J1	V1C	OC	Lamp5	GSM6709713
	24206	K1	FI	FC	Sst	GSM6838779				3629	C1	FI	FC	Sst	GSM7227187				5318	C4	CA1R	HIP	Pvalb	GSM6557377
	26454	L1	LEC	TC	Sst	GSM6811296				3733	C1	FI	FC	Sst	GSM7228492				21421	J3	A25	FC	Pvalb	GSM6344910
	27031	L1	LEC	TC	Sst	GSM6811936				21438	L1	M1C	FC	Sst	GSM6779943				18227	I3	MTG	TC	Pvalb	GSM7343392
	26995	L1	LEC	TC	Sst	GSM6811899				9451	E4	MTG	TC	Vip	GSM5161743				13284	G4	LEC	TC	Pvalb	GSM7320447
	8243	D3	A46	FC	Sst	GSM6790399				15475	I1	LEC	TC	Lamp5	GSM6785762				12958	G4	LEC	TC	Vip	GSM7318391
	22900	K1	FI	FC	Sst	GSM6837369				9519	E4	MTG	TC	Pvalb	GSM5162741				13062	G4	LEC	TC	Vip	GSM7319006
	24799	K1	FI	FC	Sst	GSM6839413				9540	E4	MTG	TC	Pvalb	GSM5163137				15608	H3	A24	FC	Pvalb	GSM7337453
	25938	L1	LEC	TC	Sst	GSM6810704				20103	K1	M1C	FC	Vip	GSM6772446				13791	H1	MEC	TC	Vip	GSM6368363
	25775	L1	LEC	TC	Sst	GSM6810513				19476	J3	A24	FC	Lamp5	GSM6875508				1113	A3	FI	FC	Sncg	GSM6370679
	27578	L1	LEC	TC	Sst	GSM6812557				21254	K1	M1C	FC	Pvalb	GSM6774105				13331	G4	LEC	TC	Pvalb	GSM7320758
	16170	H2	A25	FC	Sst	GSM6155554				21638	L1	M1C	FC	Pvalb	GSM6780725				1555	A4	A46	FC	Lamp5	GSM6374552
	26282	L1	LEC	TC	Sst	GSM6811105				9438	E4	MTG	TC	Vip	GSM5161465				11554	G1	S1C	PC	Pvalb	GSM6308950
	25426	L1	LEC	TC	Sst	GSM6810129				19698	K1	M1C	FC	Sst	GSM6771913				18965	J1	V1C	OC	Lamp5	GSM6709216
	25102	K1	FI	FC	Sst	GSM6839746				16037	I1	LEC	TC	Vip	GSM6786559				13312	G4	LEC	TC	Lamp5	GSM7320674
	25579	L1	LEC	TC	Sst	GSM6810299				20291	K1	M1C	FC	Pvalb	GSM6772689				13180	G4	LEC	TC	Vip	GSM7319838
	27118	L1	LEC	TC	Sst	GSM6812033				16285	I1	LEC	TC	Sncg	GSM6786881				170	A1	MTG	TC	Sst	GSM6336381
	27534	L1	LEC	TC	Sst	GSM6812511				15222	I1	LEC	TC	Sst	GSM6785210				11390	G1	S1C	PC	Pvalb	GSM6307782
	24070	K1	FI	FC	Sst	GSM6838635				16916	I1	LEC	TC	Sst	GSM6787735				980	A3	FI	FC	Sncg	GSM6369657
	9007	D4	MTG	TC	Sst	GSM6798330				18247	J1	MEC	TC	Sst	GSM6228895				12843	G4	LEC	TC	Sncg	GSM7317895
	26614	L1	LEC	TC	Sst	GSM6811469				15943	I1	LEC	TC	Sncg	GSM6786434				12998	G4	LEC	TC	Sncg	GSM7318664
	22907	K1	FI	FC	Sst	GSM6837378				16372	I1	LEC	TC	Sncg	GSM6786986				15908	H4	A46	FC	Vip	GSM7326358
	27654	L1	LEC	TC	Sst	GSM6812640				20786	K1	M1C	FC	Sst	GSM6773419				13680	H1	MEC	TC	Pvalb	GSM6367810
	8249	D3	A46	FC	Sst	GSM6789453				16090	I1	LEC	TC	Sst	GSM6786621				16142	H4	A46	FC	Sst	GSM7327883
	8274	D3	A46	FC	Sst	GSM6789981				19895	K1	M1C	FC	Pvalb	GSM6772170				1577	A4	A46	FC	Vip	GSM6374627
	27100	L1	LEC	TC	Sst	GSM6812013				9491	E4	MTG	TC	Pvalb	GSM5162262				10745	F2	ITG	TC	Lamp5	GSM6358892
	24155	K1	FI	FC	Sst	GSM6838725				9518	E4	MTG	TC	Pvalb	GSM5162673				14390	H2	Pro	OC	Pvalb	GSM6675988
	26198	L1	LEC	TC	Sst	GSM6811005				21629	L1	M1C	FC	Sncg	GSM6780681				13702	H1	MEC	TC	Pvalb	GSM6367865
	25989	L1	LEC	TC	Sst	GSM6810761				15193	I1	LEC	TC	Sst	GSM6785158				1124	A3	FI	FC	Lamp5	GSM6370842
	23369	K1	FI	FC	Sst	GSM6837877				19535	K1	M1C	FC	Pvalb	GSM6771639				13246	G4	LEC	TC	Sncg	GSM7320166
	26811	L1	LEC	TC	Sst	GSM6811692				21053	K1	M1C	FC	Vip	GSM6773795				563	A2	A5-A7	PC	Sst	GSM6353032
	8291	D3	A46	FC	Sst	GSM6789602				21454	L1	M1C	FC	Lamp5	GSM6779995				600	A2	A5-A7	PC	Sst	GSM6354275
	19858	J1	V1C	OC	Sst	GSM6739606				17026	I1	LEC	TC	Lamp5	GSM6787860				136	A1	MTG	TC	Lamp5	GSM6336185
	24657	K1	FI	FC	Sst	GSM6839267				11667	F4	CA1R-CA2R-CA3R	HIP	Sncg	GSM5867535				20778	J2	A24	FC	Lamp5	GSM6362032
	26285	L1	LEC	TC	Sst	GSM6811110				19604	K1	M1C	FC	Pvalb	GSM6771791				19030	J1	V1C	OC	Sst	GSM6709798
	26391	L1	LEC	TC	Sst	GSM6811227				21946	L2	A1C	TC	Pvalb	GSM7292361				10676	F2	ITG	TC	Sst	GSM6357879
	27543	L1	LEC	TC	Sst	GSM6812522				22375	L2	A1C	TC	Sncg	GSM7294204				18251	I3	MTG	TC	Pvalb	GSM7343563
	25824	L1	LEC	TC	Sst	GSM6810567				20377	K1	M1C	FC	Sst	GSM6772858				13584	H1	MEC	TC	Lamp5	GSM6367308
	27590	L1	LEC	TC	Sst	GSM6812571				9515	E4	MTG	TC	Vip	GSM5162601				18885	J1	V1C	OC	Vip	GSM6708428
	27049	L1	LEC	TC	Sst	GSM6811956				3669	C1	FI	FC	Lamp5	GSM7228170				13620	H1	MEC	TC	Lamp5	GSM6367546
	9056	D4	MTG	TC	Sst	GSM6799679				19600	K1	M1C	FC	Lamp5	GSM6771787				12924	G4	LEC	TC	Vip	GSM7318233
	27430	L1	LEC	TC	Sst	GSM6812393				16353	I1	LEC	TC	Pvalb	GSM6786964				15657	H3	A24	FC	Vip	GSM7339624
	26959	L1	LEC	TC	Sst	GSM6811857				3666	C1	FI	FC	Vip	GSM7228155				561	A2	A5-A7	PC	Lamp5	GSM6353016
	8251	D3	A46	FC	Sst	GSM6790293				20689	K1	M1C	FC	Lamp5	GSM6773288				16097	H4	A46	FC	Vip	GSM7327584
	24156	K1	FI	FC	Sst	GSM6838726				8853	E3	DGR-CA4Rpy	HIP	Lamp5	GSM5865902				5365	C4	CA1R	HIP	Lamp5	GSM6559241
	27153	L1	LEC	TC	Sst	GSM6812074				20562	K1	M1C	FC	Pvalb	GSM6773116				16126	H4	A46	FC	Vip	GSM7327741
	8245	D3	A46	FC	Sst	GSM6791526				9378	E4	MTG	TC	Sst	GSM5160993				131	A1	MTG	TC	Sst	GSM6336167
	26827	L1	LEC	TC	Sst	GSM6811711				15713	I1	LEC	TC	Sst	GSM6786144				13208	G4	LEC	TC	Vip	GSM7320007
	27162	L1	LEC	TC	Sst	GSM6812084				21006	K1	M1C	FC	Vip	GSM6773734				2540	B2	A44-A45	FC	Vip	GSM6406130
	27278	L1	LEC	TC	Sst	GSM6812211				9381	E4	MTG	TC	Pvalb	GSM5161040				21250	J3	A25	FC	Sncg	GSM6343647
	16319	H3	A24	FC	Sst	GSM6869198				9529	E4	MTG	TC	Sncg	GSM5162871				16093	H4	A46	FC	Sst	GSM7327568
	26874	L1	LEC	TC	Sst	GSM6811761				16136	I1	LEC	TC	Sncg	GSM6786677				18908	J1	V1C	OC	Vip	GSM6708683
	26263	L1	LEC	TC	Sst	GSM6811080				16106	I1	LEC	TC	Vip	GSM6786640				1018	A3	FI	FC	Pvalb	GSM6369961
	26969	L1	LEC	TC	Sst	GSM6811872				17104	I1	LEC	TC	Sst	GSM6787949				972	A3	FI	FC	Vip	GSM6369624
	26224	L1	LEC	TC	Sst	GSM6811036				8852	E3	DGR-CA4Rpy	HIP	Lamp5	GSM5865897				1547	A4	A46	FC	Pvalb	GSM6374519
	25684	L1	LEC	TC	Sst	GSM6810410				15494	I1	LEC	TC	Lamp5	GSM6785787				13101	G4	LEC	TC	Sst	GSM7319320
	27612	L1	LEC	TC	Sst	GSM6812596				16465	I1	LEC	TC	Sncg	GSM6787145				1629	A4	A46	FC	Vip	GSM6374899
	26232	L1	LEC	TC	Sst	GSM6811045				20477	K1	M1C	FC	Sst	GSM6773009				18808	J1	V1C	OC	Vip	GSM6707573
	25274	K1	FI	FC	Sst	GSM6839928				9385	E4	MTG	TC	Vip	GSM5161075				20857	J2	A24	FC	Sncg	GSM6363359
	25968	L1	LEC	TC	Sst	GSM6810737				16969	I1	LEC	TC	Vip	GSM6787797				2524	B2	A44-A45	FC	Vip	GSM6406056
	24228	K1	FI	FC	Sst	GSM6838801				16171	I1	LEC	TC	Sncg	GSM6786725				11545	G1	S1C	PC	Sncg	GSM6308914
	4179	C1	A5	PC	Sst	GSM5408253				9396	E4	MTG	TC	Sst	GSM5161175				13203	G4	LEC	TC	Vip	GSM7319995
	26994	L1	LEC	TC	Sst	GSM6811898				8826	E3	DGR-CA4Rpy	HIP	Vip	GSM5865656				18765	J1	V1C	OC	Vip	GSM6707190
	8235	D3	A46	FC	Sst	GSM6791864				11724	F4	CA1R-CA2R-CA3R	HIP	Lamp5	GSM5868008				10711	F2	ITG	TC	Sst	GSM6358721
	26652	L1	LEC	TC	Sst	GSM6811511				15137	I1	LEC	TC	Pvalb	GSM6785079				12946	G4	LEC	TC	Sncg	GSM7318315
	24879	K1	FI	FC	Sst	GSM6839497				15938	I1	LEC	TC	Pvalb	GSM6786429				18293	I3	MTG	TC	Vip	GSM7344055
	27596	L1	LEC	TC	Sst	GSM6812578				9474	E4	MTG	TC	Vip	GSM5162053				13095	G4	LEC	TC	Vip	GSM7319302
	9059	D4	MTG	TC	Sst	GSM6800525				15062	I1	LEC	TC	Vip	GSM6784987				21422	J3	A25	FC	Sncg	GSM6344915
	27420	L1	LEC	TC	Sst	GSM6812382				19775	K1	M1C	FC	Vip	GSM6772014				18984	J1	V1C	OC	Pvalb	GSM6709439
	8275	D3	A46	FC	Sst	GSM6790357				3684	C1	FI	FC	Lamp5	GSM7228210				18769	J1	V1C	OC	Sncg	GSM6707209
	16312	H3	A24	FC	Sst	GSM6869182				20286	K1	M1C	FC	Lamp5	GSM6772681				13077	G4	LEC	TC	Pvalb	GSM7319170
	25562	L1	LEC	TC	Sst	GSM6810279				19889	K1	M1C	FC	Pvalb	GSM6772164				13349	G4	LEC	TC	Lamp5	GSM7320901
	23550	K1	FI	FC	Sst	GSM6838074				9525	E4	MTG	TC	Pvalb	GSM5162833				2531	B2	A44-A45	FC	Vip	GSM6406077
	24046	K1	FI	FC	Sst	GSM6838611				3712	C1	FI	FC	Lamp5	GSM7228395				13731	H1	MEC	TC	Sncg	GSM6368022
	23167	K1	FI	FC	Sst	GSM6837651				8840	E3	DGR-CA4Rpy	HIP	Lamp5	GSM5865786				15888	H4	A46	FC	Pvalb	GSM7326232
	27506	L1	LEC	TC	Sst	GSM6812479				17407	J1	MEC	TC	Lamp5	GSM6226996				12864	G4	LEC	TC	Lamp5	GSM7317998
	23616	K1	FI	FC	Sst	GSM6838148				19640	K1	M1C	FC	Vip	GSM6771834				496	A2	A5-A7	PC	Sst	GSM6351773
	9048	D4	MTG	TC	Sst	GSM6798949				11676	F4	CA1R-CA2R-CA3R	HIP	Vip	GSM5867600				18357	I3	MTG	TC	Vip	GSM7344875
	23488	K1	FI	FC	Sst	GSM6838006				15401	I1	LEC	TC	Vip	GSM6785649				16121	H4	A46	FC	Vip	GSM7327716
	4184	C1	A5	PC	Sst	GSM5408295				19914	K1	M1C	FC	Pvalb	GSM6772192				13790	H1	MEC	TC	Lamp5	GSM6368360
	25604	L1	LEC	TC	Sst	GSM6810326				21531	L1	M1C	FC	Pvalb	GSM6780283				13336	G4	LEC	TC	Sncg	GSM7320783
	8262	D3	A46	FC	Sst	GSM6791514				19892	K1	M1C	FC	Sst	GSM6772167				15674	H3	A24	FC	Sst	GSM7340005
	4227	C1	A5	PC	Sst	GSM5409587				21480	L1	M1C	FC	Vip	GSM6780099				13120	G4	LEC	TC	Vip	GSM7319407
	20499	J1	V1C	OC	Sst	GSM6740328				21567	L1	M1C	FC	Pvalb	GSM6780436				1148	A3	FI	FC	Sncg	GSM6371564
	27559	L1	LEC	TC	Sst	GSM6812538				19559	K1	M1C	FC	Sst	GSM6771729				11684	G1	S1C	PC	Sncg	GSM6310492
	23498	K1	FI	FC	Sst	GSM6838017				19597	K1	M1C	FC	Vip	GSM6771784				13170	G4	LEC	TC	Vip	GSM7319809
	27615	L1	LEC	TC	Sst	GSM6812599				16967	I1	LEC	TC	Vip	GSM6787795				18869	J1	V1C	OC	Pvalb	GSM6708299
	8273	D3	A46	FC	Sst	GSM6789890				9551	E4	MTG	TC	Lamp5	GSM5163213				14562	H2	Pro	OC	Lamp5	GSM6677600
	25217	K1	FI	FC	Sst	GSM6839866				21103	K1	M1C	FC	Pvalb	GSM6773867				12950	G4	LEC	TC	Pvalb	GSM7318350
	17449	H4	LEC	TC	Sst	GSM7150448				15634	I1	LEC	TC	Vip	GSM6786002				13689	H1	MEC	TC	Sncg	GSM6367825
	8265	D3	A46	FC	Sst	GSM6789173				4246	C2	A44-A45	FC	Lamp5	GSM7300903				12867	G4	LEC	TC	Lamp5	GSM7318012
	16355	H3	A24	FC	Sst	GSM6869307				9342	E4	MTG	TC	Pvalb	GSM5160497				13830	H1	MEC	TC	Pvalb	GSM6368610
	25283	K1	FI	FC	Sst	GSM6839938				16723	I1	LEC	TC	Sncg	GSM6787482				18831	J1	V1C	OC	Sst	GSM6707836
	27037	L1	LEC	TC	Sst	GSM6811943				9371	E4	MTG	TC	Sst	GSM5160897				18302	I3	MTG	TC	Sst	GSM7344216
	27584	L1	LEC	TC	Sst	GSM6812563				20968	K1	M1C	FC	Vip	GSM6773684				5360	C4	CA1R	HIP	Sncg	GSM6559015
	9016	D4	MTG	TC	Sst	GSM6799114				16772	I1	LEC	TC	Vip	GSM6787545				13265	G4	LEC	TC	Vip	GSM7320278
	25671	L1	LEC	TC	Sst	GSM6810396				21211	K1	M1C	FC	Lamp5	GSM6774028				16013	H4	A46	FC	Sst	GSM7327149
	25201	K1	FI	FC	Sst	GSM6839850				9537	E4	MTG	TC	Lamp5	GSM5163105				15805	H4	A46	FC	Vip	GSM7325753
	16741	H4	LEC	TC	Sst	GSM7149188				15481	I1	LEC	TC	Lamp5	GSM6785769				18262	I3	MTG	TC	Vip	GSM7343664
	23546	K1	FI	FC	Sst	GSM6838070				19883	K1	M1C	FC	Pvalb	GSM6772158				20795	J2	A24	FC	Pvalb	GSM6362287
	8246	D3	A46	FC	Sst	GSM6791862				15959	I1	LEC	TC	Pvalb	GSM6786452				1564	A4	A46	FC	Pvalb	GSM6374581
	8290	D3	A46	FC	Sst	GSM6789559				20111	K1	M1C	FC	Sncg	GSM6772455				1022	A3	FI	FC	Sst	GSM6370023
	24224	K1	FI	FC	Sst	GSM6838797				19620	K1	M1C	FC	Sst	GSM6771811				8183	E1	A19	OC	Pvalb	GSM6330252
	4256	C1	A5	PC	Sst	GSM5410187				3793	C1	FI	FC	Vip	GSM7229173				2564	B2	A44-A45	FC	Lamp5	GSM6406476
	8254	D3	A46	FC	Sst	GSM6791849				19713	K1	M1C	FC	Sst	GSM6771932				13022	G4	LEC	TC	Lamp5	GSM7318742
	24794	K1	FI	FC	Sst	GSM6839408				21767	L1	M1C	FC	Vip	GSM6781357				13341	G4	LEC	TC	Sncg	GSM7320850
	24013	K1	FI	FC	Sst	GSM6838577				15787	I1	LEC	TC	Vip	GSM6786229				10684	F2	ITG	TC	Sst	GSM6357953
	24149	K1	FI	FC	Sst	GSM6838718				18125	J1	MEC	TC	Vip	GSM6228682				14491	H2	Pro	OC	Lamp5	GSM6676631
	4253	C1	A5	PC	Sst	GSM5410156				16892	I1	LEC	TC	Sncg	GSM6787708				14453	H2	Pro	OC	Lamp5	GSM6676410
	9052	D4	MTG	TC	Sst	GSM6800346				17367	J1	MEC	TC	Sncg	GSM6226922				18365	I3	MTG	TC	Pvalb	GSM7344941
	17385	H4	LEC	TC	Sst	GSM7150367				19449	J3	A24	FC	Vip	GSM6874996				13140	G4	LEC	TC	Vip	GSM7319625
	25443	L1	LEC	TC	Sst	GSM6810151				9446	E4	MTG	TC	Lamp5	GSM5161657				12826	G4	LEC	TC	Sst	GSM7317816
	15013	H1	Pro	OC	Sst	GSM5443087				20009	K1	M1C	FC	Sst	GSM6772328				21272	J3	A25	FC	Sst	GSM6343729
	8258	D3	A46	FC	Sst	GSM6790439				20318	K1	M1C	FC	Sst	GSM6772773				13017	G4	LEC	TC	Vip	GSM7318731
	25763	L1	LEC	TC	Sst	GSM6810500				20763	K1	M1C	FC	Sst	GSM6773388				15961	H4	A46	FC	Sst	GSM7326636
	27620	L1	LEC	TC	Sst	GSM6812606				19444	J3	A24	FC	Vip	GSM6874882				18270	I3	MTG	TC	Sst	GSM7343780
	8271	D3	A46	FC	Sst	GSM6789704				9444	E4	MTG	TC	Lamp5	GSM5161644				10722	F2	ITG	TC	Sst	GSM6358805
	24410	K1	FI	FC	Sst	GSM6838997				3795	C1	FI	FC	Pvalb	GSM7229175				55	A1	MTG	TC	Lamp5	GSM6334443
	25596	L1	LEC	TC	Sst	GSM6810317				21234	K1	M1C	FC	Pvalb	GSM6774062				1702	A4	A46	FC	Sst	GSM6376276
	25361	L1	LEC	TC	Sst	GSM6810061				16520	I1	LEC	TC	Pvalb	GSM6787230				16193	H4	A46	FC	Sst	GSM7328206
	27330	L1	LEC	TC	Sst	GSM6812270				14030	H2	S1C	PC	Sncg	GSM5457390				13104	G4	LEC	TC	Vip	GSM7319325
	23880	K1	FI	FC	Sst	GSM6838437				17068	I1	LEC	TC	Vip	GSM6787906				12360	G2	M1C	FC	Lamp5	GSM6315772
	9049	D4	MTG	TC	Sst	GSM6799017				3694	C1	FI	FC	Pvalb	GSM7228238				18798	J1	V1C	OC	Lamp5	GSM6707437
	27283	L1	LEC	TC	Sst	GSM6812216				19958	K1	M1C	FC	Pvalb	GSM6772246				13233	G4	LEC	TC	Vip	GSM7320111
	8289	D3	A46	FC	Sst	GSM6789497				19989	K1	M1C	FC	Sst	GSM6772301				13078	G4	LEC	TC	Vip	GSM7319181
	27894	L1	LEC	TC	Sst	GSM6812916				21612	L1	M1C	FC	Sst	GSM6780564				13796	H1	MEC	TC	Lamp5	GSM6368384
	26930	L1	LEC	TC	Sst	GSM6811826				21594	L1	M1C	FC	Vip	GSM6780508				1050	A3	FI	FC	Sncg	GSM6370147
	24447	K1	FI	FC	Sst	GSM6839035				8833	E3	DGR-CA4Rpy	HIP	Lamp5	GSM5865725				20856	J2	A24	FC	Pvalb	GSM6363319
	25083	K1	FI	FC	Sst	GSM6839726				23568	M2	LEC	TC	Lamp5	GSM7154503				532	A2	A5-A7	PC	Vip	GSM6352721
	25902	L1	LEC	TC	Sst	GSM6810663				20594	K1	M1C	FC	Pvalb	GSM6773154				14636	H2	Pro	OC	Lamp5	GSM6678419
	27063	L1	LEC	TC	Sst	GSM6811972				21680	L1	M1C	FC	Sncg	GSM6780924				13273	G4	LEC	TC	Sncg	GSM7320395
	27613	L1	LEC	TC	Sst	GSM6812597				16615	I1	LEC	TC	Sncg	GSM6787359				12343	G2	M1C	FC	Lamp5	GSM6315499
	22946	K1	FI	FC	Sst	GSM6837417				19862	K1	M1C	FC	Sst	GSM6772129				15894	H4	A46	FC	Sst	GSM7326261
	26855	L1	LEC	TC	Sst	GSM6811740				21439	L1	M1C	FC	Sst	GSM6779944				13313	G4	LEC	TC	Lamp5	GSM7320675
	25718	L1	LEC	TC	Sst	GSM6810452				20805	K1	M1C	FC	Vip	GSM6773447				5340	C4	CA1R	HIP	Sncg	GSM6558104
	8226	D3	A46	FC	Sst	GSM6789712				20836	K1	M1C	FC	Vip	GSM6773491				16086	H4	A46	FC	Lamp5	GSM7327526
	21986	J1	V1C	OC	Sst	GSM6742031				9473	E4	MTG	TC	Lamp5	GSM5162039				15899	H4	A46	FC	Pvalb	GSM7326290
	9008	D4	MTG	TC	Sst	GSM6798553				17103	I1	LEC	TC	Pvalb	GSM6787948				18845	J1	V1C	OC	Pvalb	GSM6708004
	20583	J1	V1C	OC	Sst	GSM6740416				20218	K1	M1C	FC	Sst	GSM6772591				13238	G4	LEC	TC	Vip	GSM7320128
	27073	L1	LEC	TC	Sst	GSM6811983				21584	L1	M1C	FC	Sst	GSM6780482				13113	G4	LEC	TC	Lamp5	GSM7319363
	25786	L1	LEC	TC	Sst	GSM6810527				9457	E4	MTG	TC	Sst	GSM5161845				13327	G4	LEC	TC	Sncg	GSM7320742
	8228	D3	A46	FC	Sst	GSM6789998				9526	E4	MTG	TC	Sst	GSM5162843				13332	G4	LEC	TC	Lamp5	GSM7320761
	8240	D3	A46	FC	Sst	GSM6789989				16173	I1	LEC	TC	Sst	GSM6786728				13254	G4	LEC	TC	Pvalb	GSM7320221
	25650	L1	LEC	TC	Sst	GSM6810374				21622	L1	M1C	FC	Vip	GSM6780625				18760	J1	V1C	OC	Vip	GSM6707155
	25125	K1	FI	FC	Sst	GSM6839770				16253	I1	LEC	TC	Vip	GSM6786838				13686	H1	MEC	TC	Lamp5	GSM6367819
	21912	J1	V1C	OC	Sst	GSM6741949				19692	K1	M1C	FC	Pvalb	GSM6771905				13300	G4	LEC	TC	Sst	GSM7320555
	25861	L1	LEC	TC	Sst	GSM6810613				20952	K1	M1C	FC	Sncg	GSM6773658				14400	H2	Pro	OC	Sst	GSM6676050
	26695	L1	LEC	TC	Sst	GSM6811557				21013	K1	M1C	FC	Sst	GSM6773745				18745	J1	V1C	OC	Sst	GSM6706977
	26860	L1	LEC	TC	Sst	GSM6811746				9394	E4	MTG	TC	Sst	GSM5161159				21277	J3	A25	FC	Lamp5	GSM6343763
	25868	L1	LEC	TC	Sst	GSM6810621				3682	C1	FI	FC	Vip	GSM7228208				16166	H4	A46	FC	Pvalb	GSM7328067
	8267	D3	A46	FC	Sst	GSM6789276				4349	C2	A44-A45	FC	Vip	GSM7302251				13021	G4	LEC	TC	Sst	GSM7318741
	8269	D3	A46	FC	Sst	GSM6789491				21551	L1	M1C	FC	Vip	GSM6780368				14486	H2	Pro	OC	Pvalb	GSM6676592
	23734	K1	FI	FC	Sst	GSM6838276				21464	L1	M1C	FC	Pvalb	GSM6780019				1060	A3	FI	FC	Lamp5	GSM6370192
	8233	D3	A46	FC	Sst	GSM6791227				9374	E4	MTG	TC	Pvalb	GSM5160949				1533	A4	A46	FC	Pvalb	GSM6374402
	8263	D3	A46	FC	Sst	GSM6789020				9390	E4	MTG	TC	Pvalb	GSM5161119				16025	H4	A46	FC	Pvalb	GSM7327238
	25508	L1	LEC	TC	Sst	GSM6810220				20287	K1	M1C	FC	Sncg	GSM6772682				13192	G4	LEC	TC	Lamp5	GSM7319934
	27024	L1	LEC	TC	Sst	GSM6811928				21889	L2	A1C	TC	Sncg	GSM7292243				16105	H4	A46	FC	Sst	GSM7327620
	25524	L1	LEC	TC	Sst	GSM6810238				19967	K1	M1C	FC	Sst	GSM6772261				15780	H4	A46	FC	Pvalb	GSM7325593
	27414	L1	LEC	TC	Sst	GSM6812376				21225	K1	M1C	FC	Vip	GSM6774051				18793	J1	V1C	OC	Vip	GSM6707405
	27635	L1	LEC	TC	Sst	GSM6812621				8849	E3	DGR-CA4Rpy	HIP	Vip	GSM5865861				1647	A4	A46	FC	Vip	GSM6375148
	25440	L1	LEC	TC	Sst	GSM6810148				16232	I1	LEC	TC	Vip	GSM6786809				13174	G4	LEC	TC	Pvalb	GSM7319826
	8276	D3	A46	FC	Sst	GSM6790362				11709	F4	CA1R-CA2R-CA3R	HIP	Lamp5	GSM5867862				1125	A3	FI	FC	Lamp5	GSM6370847
	25494	L1	LEC	TC	Sst	GSM6810205				16973	I1	LEC	TC	Pvalb	GSM6787802				16124	H4	A46	FC	Vip	GSM7327736
	26764	L1	LEC	TC	Sst	GSM6811637				20350	K1	M1C	FC	Sncg	GSM6772819				16096	H4	A46	FC	Sncg	GSM7327583
	27628	L1	LEC	TC	Sst	GSM6812614				9363	E4	MTG	TC	Vip	GSM5160781				18326	I3	MTG	TC	Sst	GSM7344530
	9014	D4	MTG	TC	Sst	GSM6798907				16270	I1	LEC	TC	Vip	GSM6786864				13005	G4	LEC	TC	Sncg	GSM7318685
	25768	L1	LEC	TC	Sst	GSM6810505				3829	C1	FI	FC	Lamp5	GSM7229419				13124	G4	LEC	TC	Vip	GSM7319426
	25881	L1	LEC	TC	Sst	GSM6810635				9416	E4	MTG	TC	Pvalb	GSM5161296				13076	G4	LEC	TC	Lamp5	GSM7319169
	27664	L1	LEC	TC	Sst	GSM6812651				9462	E4	MTG	TC	Pvalb	GSM5161869				18452	I3	MTG	TC	Vip	GSM7346118
	27641	L1	LEC	TC	Sst	GSM6812627				16738	I1	LEC	TC	Sncg	GSM6787505				18766	J1	V1C	OC	Pvalb	GSM6707192
	25195	K1	FI	FC	Sst	GSM6839843				15181	I1	LEC	TC	Vip	GSM6785139				18385	I3	MTG	TC	Vip	GSM7345231
	23374	K1	FI	FC	Sst	GSM6837883				19848	K1	M1C	FC	Pvalb	GSM6772112				20893	J2	A24	FC	Sncg	GSM6363863
	23736	K1	FI	FC	Sst	GSM6838278				9532	E4	MTG	TC	Pvalb	GSM5162903				11631	G1	S1C	PC	Vip	GSM6309971
	8241	D3	A46	FC	Sst	GSM6790105				16183	I1	LEC	TC	Pvalb	GSM6786742				1150	A3	FI	FC	Lamp5	GSM6371602
	16331	H3	A24	FC	Sst	GSM6869239				3739	C1	FI	FC	Sst	GSM7228523				5326	C4	CA1R	HIP	Pvalb	GSM6557733
	8999	D4	MTG	TC	Sst	GSM6798608				19658	K1	M1C	FC	Sst	GSM6771856				13004	G4	LEC	TC	Lamp5	GSM7318684
	26694	L1	LEC	TC	Sst	GSM6811556				21174	K1	M1C	FC	Pvalb	GSM6773966				21276	J3	A25	FC	Vip	GSM6343759
	25715	L1	LEC	TC	Sst	GSM6810447				21026	K1	M1C	FC	Sst	GSM6773758				15826	H4	A46	FC	Sst	GSM7325887
	25180	K1	FI	FC	Sst	GSM6839827				20442	K1	M1C	FC	Pvalb	GSM6772964				7	A1	MTG	TC	Sst	GSM6333563
	25755	L1	LEC	TC	Sst	GSM6810491				15131	I1	LEC	TC	Pvalb	GSM6785073				43	A1	MTG	TC	Sst	GSM6334091
	27644	L1	LEC	TC	Sst	GSM6812630				9536	E4	MTG	TC	Sst	GSM5163074				2530	B2	A44-A45	FC	Pvalb	GSM6406072
	22937	K1	FI	FC	Sst	GSM6837408				19500	J3	A24	FC	Vip	GSM6875905				12812	G4	LEC	TC	Vip	GSM7317775
	8284	D3	A46	FC	Sst	GSM6791530				11680	F4	CA1R-CA2R-CA3R	HIP	Lamp5	GSM5867625				19005	J1	V1C	OC	Pvalb	GSM6709617
	23650	K1	FI	FC	Sst	GSM6838185				16894	I1	LEC	TC	Lamp5	GSM6787711				12818	G4	LEC	TC	Sst	GSM7317803
	27021	L1	LEC	TC	Sst	GSM6811925				20381	K1	M1C	FC	Pvalb	GSM6772864				2541	B2	A44-A45	FC	Sst	GSM6406135
	22926	K1	FI	FC	Sst	GSM6837397				20916	K1	M1C	FC	Pvalb	GSM6773599				10644	F2	ITG	TC	Sst	GSM6357706
	25213	K1	FI	FC	Sst	GSM6839862				11716	F4	CA1R-CA2R-CA3R	HIP	Sst	GSM5867936				14484	H2	Pro	OC	Sst	GSM6676590
	27561	L1	LEC	TC	Sst	GSM6812540				4389	C2	A44-A45	FC	Vip	GSM7302828				14406	H2	Pro	OC	Lamp5	GSM6676078
	8297	D3	A46	FC	Sst	GSM6789992				20238	K1	M1C	FC	Vip	GSM6772614				5366	C4	CA1R	HIP	Sncg	GSM6559486
	23797	K1	FI	FC	Sst	GSM6838343				18435	J1	MEC	TC	Vip	GSM6229223				16085	H4	A46	FC	Vip	GSM7327515
	8296	D3	A46	FC	Sst	GSM6789356				22231	L2	A1C	TC	Vip	GSM7293410				78	A1	MTG	TC	Lamp5	GSM6335444
	22945	K1	FI	FC	Sst	GSM6837416				18718	J2	M1C	FC	Pvalb	GSM5152603				14500	H2	Pro	OC	Sst	GSM6676749
	27208	L1	LEC	TC	Sst	GSM6812132				14054	H2	S1C	PC	Pvalb	GSM5457473				13167	G4	LEC	TC	Lamp5	GSM7319734
	21292	J1	V1C	OC	Sst	GSM6741226				9401	E4	MTG	TC	Pvalb	GSM5161207				12853	G4	LEC	TC	Lamp5	GSM7317932
	8227	D3	A46	FC	Sst	GSM6789877				16314	I1	LEC	TC	Pvalb	GSM6786919				13058	G4	LEC	TC	Lamp5	GSM7318978
	16329	H3	A24	FC	Sst	GSM6869235				16954	I1	LEC	TC	Pvalb	GSM6787781				13220	G4	LEC	TC	Sst	GSM7320056
	23759	K1	FI	FC	Sst	GSM6838303				16580	I1	LEC	TC	Vip	GSM6787311				13786	H1	MEC	TC	Sst	GSM6368344
	25748	L1	LEC	TC	Sst	GSM6810484				23714	M2	LEC	TC	Vip	GSM7155279				15767	H4	A46	FC	Vip	GSM7325505
	25963	L1	LEC	TC	Sst	GSM6810732				19935	K1	M1C	FC	Lamp5	GSM6772217				1542	A4	A46	FC	Lamp5	GSM6374504
	8253	D3	A46	FC	Sst	GSM6791823				11734	F4	CA1R-CA2R-CA3R	HIP	Sncg	GSM5868199				18909	J1	V1C	OC	Lamp5	GSM6708690
	23405	K1	FI	FC	Sst	GSM6837916				19494	J3	A24	FC	Sst	GSM6875817				13644	H1	MEC	TC	Lamp5	GSM6367697
	23554	K1	FI	FC	Sst	GSM6838078				15514	I1	LEC	TC	Sst	GSM6785809				18902	J1	V1C	OC	Sst	GSM6708580
	25517	L1	LEC	TC	Sst	GSM6810229				21665	L1	M1C	FC	Lamp5	GSM6780860				16129	H4	A46	FC	Pvalb	GSM7327768
	16363	H3	A24	FC	Sst	GSM6869331				20034	K1	M1C	FC	Pvalb	GSM6772354				13188	G4	LEC	TC	Vip	GSM7319885
	24645	K1	FI	FC	Sst	GSM6839255				11745	F4	CA1R-CA2R-CA3R	HIP	Sst	GSM5868905				4023	C1	DGR	HIP	Sst	GSM6563158
	25557	L1	LEC	TC	Sst	GSM6810274				4331	C2	A44-A45	FC	Vip	GSM7302153				18734	J1	V1C	OC	Pvalb	GSM6706858
	24971	K1	FI	FC	Sst	GSM6839606				15658	I1	LEC	TC	Vip	GSM6786040				150	A1	MTG	TC	Pvalb	GSM6336265
	26214	L1	LEC	TC	Sst	GSM6811023				9358	E4	MTG	TC	Pvalb	GSM5160677				13063	G4	LEC	TC	Vip	GSM7319008
	27477	L1	LEC	TC	Sst	GSM6812448				4362	C2	A44-A45	FC	Vip	GSM7302316				20854	J2	A24	FC	Vip	GSM6363296
	8248	D3	A46	FC	Sst	GSM6791909				18558	J2	M1C	FC	Lamp5	GSM5152234				981	A3	FI	FC	Pvalb	GSM6369663
	26074	L1	LEC	TC	Sst	GSM6810855				15895	I1	LEC	TC	Pvalb	GSM6786374				18403	I3	MTG	TC	Pvalb	GSM7345510
	26270	L1	LEC	TC	Sst	GSM6811090				19441	J3	A24	FC	Vip	GSM6874833				16030	H4	A46	FC	Sst	GSM7327275
	8287	D3	A46	FC	Sst	GSM6791967				14015	H2	S1C	PC	Pvalb	GSM5457315				18217	I3	MTG	TC	Pvalb	GSM7343276
	20406	J1	V1C	OC	Sst	GSM6740223				20383	K1	M1C	FC	Sst	GSM6772869				13041	G4	LEC	TC	Pvalb	GSM7318812
	20739	J1	V1C	OC	Sst	GSM6740597				21245	K1	M1C	FC	Sst	GSM6774080				2568	B2	A44-A45	FC	Pvalb	GSM6406490
	8256	D3	A46	FC	Sst	GSM6790294				21908	L2	A1C	TC	Sst	GSM7292274				13212	G4	LEC	TC	Vip	GSM7320018
	8294	D3	A46	FC	Sst	GSM6789160				19549	K1	M1C	FC	Lamp5	GSM6771716				1588	A4	A46	FC	Sst	GSM6374659
	9019	D4	MTG	TC	Sst	GSM6799549				19618	K1	M1C	FC	Sst	GSM6771809				18754	J1	V1C	OC	Vip	GSM6707074
	9010	D4	MTG	TC	Sst	GSM6798668				14050	H2	S1C	PC	Sst	GSM5457452				20858	J2	A24	FC	Sst	GSM6363389
	27647	L1	LEC	TC	Sst	GSM6812633				19979	K1	M1C	FC	Lamp5	GSM6772282				14407	H2	Pro	OC	Pvalb	GSM6676083
	8272	D3	A46	FC	Sst	GSM6789707				3736	C1	FI	FC	Pvalb	GSM7228501				13109	G4	LEC	TC	Vip	GSM7319344
	24091	K1	FI	FC	Sst	GSM6838658				21679	L1	M1C	FC	Pvalb	GSM6780923				13282	G4	LEC	TC	Vip	GSM7320440
	25142	K1	FI	FC	Sst	GSM6839788				15166	I1	LEC	TC	Pvalb	GSM6785115				1127	A3	FI	FC	Sncg	GSM6370858
	8238	D3	A46	FC	Sst	GSM6789420				21084	K1	M1C	FC	Sncg	GSM6773844				13042	G4	LEC	TC	Sncg	GSM7318813
	4216	C1	A5	PC	Sst	GSM5409082				9440	E4	MTG	TC	Sst	GSM5161479				18868	J1	V1C	OC	Sst	GSM6708287
	20573	J1	V1C	OC	Sst	GSM6740406				16971	I1	LEC	TC	Sst	GSM6787799				1093	A3	FI	FC	Vip	GSM6370489
	25363	L1	LEC	TC	Sst	GSM6810063				14003	H2	S1C	PC	Vip	GSM5457253				13541	H1	MEC	TC	Lamp5	GSM6367044
	9004	D4	MTG	TC	Sst	GSM6799550				19574	K1	M1C	FC	Lamp5	GSM6771748				1679	A4	A46	FC	Sst	GSM6375870
	8261	D3	A46	FC	Sst	GSM6791427				3836	C1	FI	FC	Pvalb	GSM7229526				13216	G4	LEC	TC	Pvalb	GSM7320041
	24331	K1	FI	FC	Sst	GSM6838912				4364	C2	A44-A45	FC	Pvalb	GSM7302325				13190	G4	LEC	TC	Vip	GSM7319919
	8988	D4	MTG	TC	Sst	GSM6800193				18693	J2	M1C	FC	Pvalb	GSM5152506				13654	H1	MEC	TC	Pvalb	GSM6367721
	27930	L1	LEC	TC	Sst	GSM6812957				15411	I1	LEC	TC	Pvalb	GSM6785669				10588	F2	ITG	TC	Sst	GSM6356452
	23593	K1	FI	FC	Sst	GSM6838121				3735	C1	FI	FC	Pvalb	GSM7228500				79	A1	MTG	TC	Sncg	GSM6335446
	23085	K1	FI	FC	Sst	GSM6837565				11652	F4	CA1R-CA2R-CA3R	HIP	Pvalb	GSM5867107				18389	I3	MTG	TC	Lamp5	GSM7345276
	25156	K1	FI	FC	Sst	GSM6839802				16391	I1	LEC	TC	Pvalb	GSM6787010				15897	H4	A46	FC	Sst	GSM7326280
	26116	L1	LEC	TC	Sst	GSM6810905				16714	I1	LEC	TC	Pvalb	GSM6787472				13443	H1	MEC	TC	Sst	GSM6365856
	8224	D3	A46	FC	Sst	GSM6789572				21117	K1	M1C	FC	Sncg	GSM6773883				13308	G4	LEC	TC	Vip	GSM7320651
	8232	D3	A46	FC	Sst	GSM6790783				14062	H2	S1C	PC	Sst	GSM5457564				13673	H1	MEC	TC	Lamp5	GSM6367788
	23563	K1	FI	FC	Sst	GSM6838087				18725	J2	M1C	FC	Vip	GSM5152612				12968	G4	LEC	TC	Lamp5	GSM7318448
	24388	K1	FI	FC	Sst	GSM6838972				19472	J3	A24	FC	Vip	GSM6875405				16103	H4	A46	FC	Vip	GSM7327609
	24418	K1	FI	FC	Sst	GSM6839005				129	A1	A5-A7	PC	Vip	GSM5422352				2529	B2	A44-A45	FC	Lamp5	GSM6406071
	25225	K1	FI	FC	Sst	GSM6839875				16750	I1	LEC	TC	Vip	GSM6787518				13057	G4	LEC	TC	Vip	GSM7318976
	16441	H3	A24	FC	Sst	GSM6869740				17119	I1	LEC	TC	Lamp5	GSM6787967				12808	G4	LEC	TC	Lamp5	GSM7317757
	24063	K1	FI	FC	Sst	GSM6838628				11735	F4	CA1R-CA2R-CA3R	HIP	Pvalb	GSM5868200				13268	G4	LEC	TC	Vip	GSM7320318
	25593	L1	LEC	TC	Sst	GSM6810314				16211	I1	LEC	TC	Pvalb	GSM6786780				13132	G4	LEC	TC	Vip	GSM7319601
	8231	D3	A46	FC	Sst	GSM6790394				4374	C2	A44-A45	FC	Lamp5	GSM7302381				13679	H1	MEC	TC	Vip	GSM6367806
	19776	J1	V1C	OC	Sst	GSM6739517				21372	L1	M1C	FC	Lamp5	GSM6779662				13081	G4	LEC	TC	Vip	GSM7319199
	27070	L1	LEC	TC	Sst	GSM6811980				16416	I1	LEC	TC	Lamp5	GSM6787079				13346	G4	LEC	TC	Vip	GSM7320888
	23012	K1	FI	FC	Sst	GSM6837486				19992	K1	M1C	FC	Pvalb	GSM6772306				5371	C4	CA1R	HIP	Vip	GSM6559549
	25291	K1	FI	FC	Sst	GSM6839946				18271	J1	MEC	TC	Pvalb	GSM6228924				12912	G4	LEC	TC	Sncg	GSM7318188
	8292	D3	A46	FC	Sst	GSM6790838				20125	K1	M1C	FC	Vip	GSM6772476				13247	G4	LEC	TC	Lamp5	GSM7320170
	24195	K1	FI	FC	Sst	GSM6838768				18532	J2	M1C	FC	Lamp5	GSM5152207				14480	H2	Pro	OC	Lamp5	GSM6676568
	20848	J1	V1C	OC	Sst	GSM6740715				11780	F4	CA1R-CA2R-CA3R	HIP	Pvalb	GSM5869891				14531	H2	Pro	OC	Lamp5	GSM6677010
	21716	J1	V1C	OC	Sst	GSM6741731				9437	E4	MTG	TC	Pvalb	GSM5161464				14460	H2	Pro	OC	Sst	GSM6676450
	23257	K1	FI	FC	Sst	GSM6837751				15462	I1	LEC	TC	Sst	GSM6785746				19007	J1	V1C	OC	Vip	GSM6709633
	4224	C1	A5	PC	Sst	GSM5409567				20979	K1	M1C	FC	Vip	GSM6773696				178	A1	MTG	TC	Sst	GSM6336451
	25441	L1	LEC	TC	Sst	GSM6810149				3623	C1	FI	FC	Lamp5	GSM7227168				13825	H1	MEC	TC	Sst	GSM6368585
	25903	L1	LEC	TC	Sst	GSM6810664				20614	K1	M1C	FC	Vip	GSM6773187				157	A1	MTG	TC	Sst	GSM6336303
	27564	L1	LEC	TC	Sst	GSM6812543				16158	I1	LEC	TC	Vip	GSM6786704				1568	A4	A46	FC	Vip	GSM6374607
	27886	L1	LEC	TC	Sst	GSM6812908				19626	K1	M1C	FC	Lamp5	GSM6771818				18335	I3	MTG	TC	Sst	GSM7344613
	8266	D3	A46	FC	Sst	GSM6789191				19481	J3	A24	FC	Sst	GSM6875559				16078	H4	A46	FC	Sst	GSM7327476
	8283	D3	A46	FC	Sst	GSM6791412				20124	K1	M1C	FC	Sst	GSM6772475				13326	G4	LEC	TC	Vip	GSM7320741
	27682	L1	LEC	TC	Sst	GSM6812671				20051	K1	M1C	FC	Pvalb	GSM6772380				8298	E1	A19	OC	Pvalb	GSM6333028
	25353	L1	LEC	TC	Sst	GSM6810053				14998	I1	LEC	TC	Pvalb	GSM6784894				20838	J2	A24	FC	Pvalb	GSM6363053
	8264	D3	A46	FC	Sst	GSM6789045				15103	I1	LEC	TC	Pvalb	GSM6785042				21200	J3	A25	FC	Lamp5	GSM6343381
	24494	K1	FI	FC	Sst	GSM6839090				22187	L2	A1C	TC	Sncg	GSM7293302				18243	I3	MTG	TC	Vip	GSM7343509
	8280	D3	A46	FC	Sst	GSM6790844				3710	C1	FI	FC	Sst	GSM7228391				13226	G4	LEC	TC	Sncg	GSM7320087
	22227	J1	V1C	OC	Sst	GSM6742355				21915	L2	A1C	TC	Vip	GSM7292283				11490	G1	S1C	PC	Pvalb	GSM6308605
	27075	L1	LEC	TC	Sst	GSM6811986				19445	J3	A24	FC	Pvalb	GSM6874886				13137	G4	LEC	TC	Lamp5	GSM7319616
	27248	L1	LEC	TC	Sst	GSM6812176				15950	I1	LEC	TC	Pvalb	GSM6786441				13169	G4	LEC	TC	Vip	GSM7319801
	23453	K1	FI	FC	Sst	GSM6837968				9512	E4	MTG	TC	Sst	GSM5162485				11377	G1	S1C	PC	Vip	GSM6307720
	24605	K1	FI	FC	Sst	GSM6839211				3778	C1	FI	FC	Lamp5	GSM7229059				11585	G1	S1C	PC	Sst	GSM6309057
	23401	K1	FI	FC	Sst	GSM6837911				20724	K1	M1C	FC	Lamp5	GSM6773341				12886	G4	LEC	TC	Vip	GSM7318086
	24836	K1	FI	FC	Sst	GSM6839452				9470	E4	MTG	TC	Pvalb	GSM5161974				21290	J3	A25	FC	Pvalb	GSM6343806
	8301	D3	A46	FC	Sst	GSM6789609				22411	L2	A1C	TC	Pvalb	GSM7294267				13713	H1	MEC	TC	Pvalb	GSM6367908
	26188	L1	LEC	TC	Sst	GSM6810994				22317	L2	A1C	TC	Sst	GSM7293833				18226	I3	MTG	TC	Sncg	GSM7343383
	27453	L1	LEC	TC	Sst	GSM6812419				19797	K1	M1C	FC	Vip	GSM6772045				12987	G4	LEC	TC	Lamp5	GSM7318592
	22171	J1	V1C	OC	Sst	GSM6742287				16854	I1	LEC	TC	Lamp5	GSM6787654				13002	G4	LEC	TC	Sst	GSM7318679
	4186	C1	A5	PC	Sst	GSM5408304				9471	E4	MTG	TC	Pvalb	GSM5161989				18735	J1	V1C	OC	Pvalb	GSM6706873
	27638	L1	LEC	TC	Sst	GSM6812624				15024	I1	LEC	TC	Pvalb	GSM6784928				1609	A4	A46	FC	Sncg	GSM6374718
	24596	K1	FI	FC	Sst	GSM6839202				20802	K1	M1C	FC	Sst	GSM6773443				18980	J1	V1C	OC	Sncg	GSM6709353
	9024	D4	MTG	TC	Sst	GSM6799802				16468	I1	LEC	TC	Lamp5	GSM6787149				1583	A4	A46	FC	Sst	GSM6374637
	25190	K1	FI	FC	Sst	GSM6839838				15409	I1	LEC	TC	Pvalb	GSM6785659				13296	G4	LEC	TC	Sncg	GSM7320525
	27452	L1	LEC	TC	Sst	GSM6812418				15838	I1	LEC	TC	Pvalb	GSM6786291				11435	G1	S1C	PC	Vip	GSM6308045
	4243	C1	A5	PC	Sst	GSM5409869				15499	I1	LEC	TC	Sncg	GSM6785792				13675	H1	MEC	TC	Lamp5	GSM6367801
	9015	D4	MTG	TC	Sst	GSM6798912				9370	E4	MTG	TC	Sst	GSM5160889				21450	J3	A25	FC	Sst	GSM6345161
	8268	D3	A46	FC	Sst	GSM6789380				9426	E4	MTG	TC	Sst	GSM5161356				18827	J1	V1C	OC	Pvalb	GSM6707802
	8270	D3	A46	FC	Sst	GSM6789646				15036	I1	LEC	TC	Sst	GSM6784951				20762	J2	A24	FC	Lamp5	GSM6361948
	24083	K1	FI	FC	Sst	GSM6838648				15078	I1	LEC	TC	Sst	GSM6785008				5325	C4	CA1R	HIP	Sncg	GSM6557722
	20450	J1	V1C	OC	Sst	GSM6740271				18552	J2	M1C	FC	Vip	GSM5152227				13234	G4	LEC	TC	Vip	GSM7320113
	8259	D3	A46	FC	Sst	GSM6790776				15585	I1	LEC	TC	Lamp5	GSM6785930				12963	G4	LEC	TC	Sncg	GSM7318426
	8286	D3	A46	FC	Sst	GSM6791813				9347	E4	MTG	TC	Pvalb	GSM5160522				5339	C4	CA1R	HIP	Pvalb	GSM6558091
	24838	K1	FI	FC	Sst	GSM6839454				22487	L2	A1C	TC	Sst	GSM7294517				13125	G4	LEC	TC	Sst	GSM7319433
	25272	K1	FI	FC	Sst	GSM6839925				14043	H2	S1C	PC	Vip	GSM5457433				12954	G4	LEC	TC	Sncg	GSM7318368
	20648	J1	V1C	OC	Sst	GSM6740494				15715	I1	LEC	TC	Lamp5	GSM6786146				1532	A4	A46	FC	Pvalb	GSM6374387
	21020	J1	V1C	OC	Sst	GSM6740926				16293	I1	LEC	TC	Lamp5	GSM6786890				2537	B2	A44-A45	FC	Sst	GSM6406099
	21861	J1	V1C	OC	Sst	GSM6741896				21932	L2	A1C	TC	Pvalb	GSM7292322				10754	F2	ITG	TC	Lamp5	GSM6359021
	4222	C1	A5	PC	Sst	GSM5409433				9456	E4	MTG	TC	Sst	GSM5161816				16028	H4	A46	FC	Vip	GSM7327265
	25776	L1	LEC	TC	Sst	GSM6810515				11648	F4	CA1R-CA2R-CA3R	HIP	Lamp5	GSM5867050				1083	A3	FI	FC	Sncg	GSM6370450
	25458	L1	LEC	TC	Sst	GSM6810168				16779	I1	LEC	TC	Pvalb	GSM6787554				20768	J2	A24	FC	Pvalb	GSM6361972
	8260	D3	A46	FC	Sst	GSM6791116				15183	I1	LEC	TC	Sst	GSM6785141				12894	G4	LEC	TC	Lamp5	GSM7318143
	8288	D3	A46	FC	Sst	GSM6791982				20049	K1	M1C	FC	Vip	GSM6772377				20792	J2	A24	FC	Vip	GSM6362281
	9057	D4	MTG	TC	Sst	GSM6799712				21732	L1	M1C	FC	Vip	GSM6781117				13245	G4	LEC	TC	Vip	GSM7320155
	25268	K1	FI	FC	Sst	GSM6839920				9488	E4	MTG	TC	Vip	GSM5162231				13250	G4	LEC	TC	Pvalb	GSM7320179
	21049	J1	V1C	OC	Sst	GSM6740958				21910	L2	A1C	TC	Vip	GSM7292276				13539	H1	MEC	TC	Sst	GSM6367041
	8279	D3	A46	FC	Sst	GSM6790422				19615	K1	M1C	FC	Sst	GSM6771804				10579	F2	ITG	TC	Sncg	GSM6356128
	24449	K1	FI	FC	Sst	GSM6839038				9366	E4	MTG	TC	Lamp5	GSM5160841				2543	B2	A44-A45	FC	Vip	GSM6406143
	26788	L1	LEC	TC	Sst	GSM6811665				14036	H2	S1C	PC	Vip	GSM5457418				128	A1	MTG	TC	Sncg	GSM6336009
	27652	L1	LEC	TC	Sst	GSM6812638				16246	I1	LEC	TC	Pvalb	GSM6786828				1112	A3	FI	FC	Vip	GSM6370676
	27859	L1	LEC	TC	Sst	GSM6812877				11708	F4	CA1R-CA2R-CA3R	HIP	Sncg	GSM5867861				20751	J2	A24	FC	Lamp5	GSM6361828
	16675	H3	A24	FC	Sst	GSM6870540				19753	K1	M1C	FC	Sst	GSM6771983				4004	C1	DGR	HIP	Lamp5	GSM6561787
	23520	K1	FI	FC	Sst	GSM6838040				15889	I1	LEC	TC	Sst	GSM6786366				4024	C1	DGR	HIP	Pvalb	GSM6563166
	24609	K1	FI	FC	Sst	GSM6839216				5485	C4	CA1C-CA2C-CA3C-DGC-CA4C	HIP	Pvalb	GSM6002536				10587	F2	ITG	TC	Lamp5	GSM6356449
	17386	H4	LEC	TC	Sst	GSM7150368				9482	E4	MTG	TC	Sst	GSM5162155				18313	I3	MTG	TC	Pvalb	GSM7344355
	27913	L1	LEC	TC	Sst	GSM6812939				16393	I1	LEC	TC	Sst	GSM6787013				18882	J1	V1C	OC	Sst	GSM6708416
	23323	K1	FI	FC	Sst	GSM6837824				16471	I1	LEC	TC	Sst	GSM6787153				18444	I3	MTG	TC	Pvalb	GSM7345993
	24425	K1	FI	FC	Sst	GSM6839012				4395	C2	A44-A45	FC	Vip	GSM7302852				16154	H4	A46	FC	Vip	GSM7327988
	25728	L1	LEC	TC	Sst	GSM6810464				19647	K1	M1C	FC	Vip	GSM6771845				19011	J1	V1C	OC	Sncg	GSM6709647
	8242	D3	A46	FC	Sst	GSM6790363				9382	E4	MTG	TC	Vip	GSM5161048				13795	H1	MEC	TC	Lamp5	GSM6368376
	23583	K1	FI	FC	Sst	GSM6838110				21081	K1	M1C	FC	Lamp5	GSM6773838				21205	J3	A25	FC	Pvalb	GSM6343395
	9053	D4	MTG	TC	Sst	GSM6800370				18667	J2	M1C	FC	Sst	GSM5152469				21161	J3	A25	FC	Sst	GSM6343065
	25582	L1	LEC	TC	Sst	GSM6810302				11679	F4	CA1R-CA2R-CA3R	HIP	Lamp5	GSM5867616				10586	F2	ITG	TC	Vip	GSM6356444
	23259	K1	FI	FC	Sst	GSM6837753				18331	J1	MEC	TC	Pvalb	GSM6229004				1023	A3	FI	FC	Sst	GSM6370027
	19945	J1	V1C	OC	Sst	GSM6739701				22015	L2	A1C	TC	Pvalb	GSM7292517				1084	A3	FI	FC	Vip	GSM6370451
	26372	L1	LEC	TC	Sst	GSM6811208				15988	I1	LEC	TC	Sst	GSM6786486				13652	H1	MEC	TC	Pvalb	GSM6367717
	27510	L1	LEC	TC	Sst	GSM6812483				15703	I1	LEC	TC	Lamp5	GSM6786126				2578	B2	A44-A45	FC	Sst	GSM6406526
	23600	K1	FI	FC	Sst	GSM6838129				16884	I1	LEC	TC	Lamp5	GSM6787697				15974	H4	A46	FC	Sst	GSM7326698
	24460	K1	FI	FC	Sst	GSM6839051				15607	I1	LEC	TC	Sncg	GSM6785963				11372	G1	S1C	PC	Sst	GSM6307703
	19872	J1	V1C	OC	Sst	GSM6739621				20700	K1	M1C	FC	Sst	GSM6773311				14409	H2	Pro	OC	Pvalb	GSM6676110
	26314	L1	LEC	TC	Sst	GSM6811144				21582	L1	M1C	FC	Sst	GSM6780474				13789	H1	MEC	TC	Pvalb	GSM6368356
	9039	D4	MTG	TC	Sst	GSM6799675				20592	K1	M1C	FC	Vip	GSM6773152				14478	H2	Pro	OC	Pvalb	GSM6676556
	25692	L1	LEC	TC	Sst	GSM6810418				20767	K1	M1C	FC	Lamp5	GSM6773395				5331	C4	CA1R	HIP	Lamp5	GSM6557894
	8985	D4	MTG	TC	Sst	GSM6799699				8842	E3	DGR-CA4Rpy	HIP	Lamp5	GSM5865802				13788	H1	MEC	TC	Vip	GSM6368350
	9017	D4	MTG	TC	Sst	GSM6799182				20780	K1	M1C	FC	Pvalb	GSM6773412				18771	J1	V1C	OC	Pvalb	GSM6707217
	25732	L1	LEC	TC	Sst	GSM6810468				16203	I1	LEC	TC	Pvalb	GSM6786768				8193	E1	A19	OC	Lamp5	GSM6330339
	8229	D3	A46	FC	Sst	GSM6790232				8832	E3	DGR-CA4Rpy	HIP	Vip	GSM5865720				12967	G4	LEC	TC	Lamp5	GSM7318443
	26196	L1	LEC	TC	Sst	GSM6811003				9337	E4	MTG	TC	Vip	GSM5160340				21268	J3	A25	FC	Lamp5	GSM6343717
	8244	D3	A46	FC	Sst	GSM6790815				9514	E4	MTG	TC	Vip	GSM5162565				12966	G4	LEC	TC	Lamp5	GSM7318439
	8299	D3	A46	FC	Sst	GSM6791409				23760	M2	LEC	TC	Vip	GSM7155649				18380	I3	MTG	TC	Sncg	GSM7345118
	4228	C1	A5	PC	Sst	GSM5409666				4373	C2	A44-A45	FC	Pvalb	GSM7302377				5346	C4	CA1R	HIP	Pvalb	GSM6558481
	9013	D4	MTG	TC	Sst	GSM6798872				15142	I1	LEC	TC	Pvalb	GSM6785084				88	A1	MTG	TC	Pvalb	GSM6335533
	9035	D4	MTG	TC	Sst	GSM6798875				3840	C1	FI	FC	Vip	GSM7229542				12408	G2	M1C	FC	Sst	GSM6316826
	27346	L1	LEC	TC	Sst	GSM6812287				11723	F4	CA1R-CA2R-CA3R	HIP	Lamp5	GSM5867964				19009	J1	V1C	OC	Pvalb	GSM6709637
	8255	D3	A46	FC	Sst	GSM6789169				16942	I1	LEC	TC	Lamp5	GSM6787767				2924	B3	DGC	HIP	Sncg	GSM6525917
	1244	A3	CA1C	HIP	Sst	GSM6159452				2407	B2	A19	OC	Sncg	GSM7194082				13775	H1	MEC	TC	Pvalb	GSM6368269
	8995	D4	MTG	TC	Sst	GSM6798942				15447	I1	LEC	TC	Lamp5	GSM6785724				14394	H2	Pro	OC	Pvalb	GSM6676016
	9043	D4	MTG	TC	Sst	GSM6800144				21127	K1	M1C	FC	Pvalb	GSM6773902				18235	I3	MTG	TC	Sst	GSM7343458
	27696	L1	LEC	TC	Sst	GSM6812686				21621	L1	M1C	FC	Pvalb	GSM6780624				12921	G4	LEC	TC	Sncg	GSM7318228
	8298	D3	A46	FC	Sst	GSM6790711				5472	C4	CA1C-CA2C-CA3C-DGC-CA4C	HIP	Sst	GSM6002226				10743	F2	ITG	TC	Sst	GSM6358878
	24174	K1	FI	FC	Sst	GSM6838746				9449	E4	MTG	TC	Sst	GSM5161701				21262	J3	A25	FC	Sst	GSM6343700
	20432	J1	V1C	OC	Sst	GSM6740251				18368	J1	MEC	TC	Lamp5	GSM6229055				13185	G4	LEC	TC	Lamp5	GSM7319878
	9011	D4	MTG	TC	Sst	GSM6798768				21076	K1	M1C	FC	Pvalb	GSM6773829				20732	J2	A24	FC	Pvalb	GSM6361399
	9054	D4	MTG	TC	Sst	GSM6800461				15913	I1	LEC	TC	Pvalb	GSM6786398				1596	A4	A46	FC	Sncg	GSM6374679
	8230	D3	A46	FC	Sst	GSM6790271				9398	E4	MTG	TC	Sst	GSM5161182				21223	J3	A25	FC	Sncg	GSM6343505
	23410	K1	FI	FC	Sst	GSM6837922				17507	J1	MEC	TC	Sst	GSM6227194				15971	H4	A46	FC	Sst	GSM7326682
	8996	D4	MTG	TC	Sst	GSM6799280				3828	C1	FI	FC	Vip	GSM7229418				18263	I3	MTG	TC	Vip	GSM7343682
	27051	L1	LEC	TC	Sst	GSM6811958				18559	J2	M1C	FC	Vip	GSM5152235				87	A1	MTG	TC	Vip	GSM6335532
	27121	L1	LEC	TC	Sst	GSM6812037				20840	K1	M1C	FC	Pvalb	GSM6773497				13553	H1	MEC	TC	Lamp5	GSM6367067
	24442	K1	FI	FC	Sst	GSM6839030				16479	I1	LEC	TC	Pvalb	GSM6787162				11643	G1	S1C	PC	Sst	GSM6310024
	8223	D3	A46	FC	Sst	GSM6789275				20400	K1	M1C	FC	Sst	GSM6772896				5321	C4	CA1R	HIP	Pvalb	GSM6557677
	8225	D3	A46	FC	Sst	GSM6789681				22395	L2	A1C	TC	Pvalb	GSM7294239				132	A1	MTG	TC	Sncg	GSM6336169
	26704	L1	LEC	TC	Sst	GSM6811567				9493	E4	MTG	TC	Sst	GSM5162359				3991	C1	DGR	HIP	Sst	GSM6561340
	8236	D3	A46	FC	Sst	GSM6789049				23682	M2	LEC	TC	Lamp5	GSM7155188				12989	G4	LEC	TC	Vip	GSM7318607
	24876	K1	FI	FC	Sst	GSM6839494				19791	K1	M1C	FC	Pvalb	GSM6772036				20796	J2	A24	FC	Pvalb	GSM6362290
	4267	C1	A5	PC	Sst	GSM5410295				16755	I1	LEC	TC	Vip	GSM6787526				13337	G4	LEC	TC	Sncg	GSM7320786
	9022	D4	MTG	TC	Sst	GSM6799689				3643	C1	FI	FC	Pvalb	GSM7227717				13664	H1	MEC	TC	Vip	GSM6367750
	9027	D4	MTG	TC	Sst	GSM6800167				20416	K1	M1C	FC	Pvalb	GSM6772927				21275	J3	A25	FC	Sncg	GSM6343747
	26123	L1	LEC	TC	Sst	GSM6810912				15551	I1	LEC	TC	Sncg	GSM6785878				18736	J1	V1C	OC	Sst	GSM6706875
	23144	K1	FI	FC	Sst	GSM6837627				16302	I1	LEC	TC	Sncg	GSM6786902				21288	J3	A25	FC	Vip	GSM6343803
	27319	L1	LEC	TC	Sst	GSM6812256				22524	L2	A1C	TC	Sncg	GSM7294610				11507	G1	S1C	PC	Pvalb	GSM6308700
	8997	D4	MTG	TC	Sst	GSM6799791				18525	J2	M1C	FC	Sst	GSM5152199				20748	J2	A24	FC	Pvalb	GSM6361809
	8277	D3	A46	FC	Sst	GSM6790367				9475	E4	MTG	TC	Sst	GSM5162092				1030	A3	FI	FC	Vip	GSM6370068
	24890	K1	FI	FC	Sst	GSM6839511				15205	I1	LEC	TC	Vip	GSM6785178				19031	J1	V1C	OC	Sst	GSM6709806
	16607	H3	A24	FC	Sst	GSM6870388				3648	C1	FI	FC	Sst	GSM7228081				13629	H1	MEC	TC	Vip	GSM6367649
	9034	D4	MTG	TC	Sst	GSM6798812				3842	C1	FI	FC	Sst	GSM7229548				21094	J3	A25	FC	Pvalb	GSM6342611
	23738	K1	FI	FC	Sst	GSM6838280				18716	J2	M1C	FC	Vip	GSM5152601				15891	H4	A46	FC	Vip	GSM7326253
	4247	C1	A5	PC	Sst	GSM5409924				15654	I1	LEC	TC	Vip	GSM6786035				13291	G4	LEC	TC	Sncg	GSM7320501
	25503	L1	LEC	TC	Sst	GSM6810215				18291	J1	MEC	TC	Vip	GSM6228951				21235	J3	A25	FC	Sst	GSM6343537
	25738	L1	LEC	TC	Sst	GSM6810474				19571	K1	M1C	FC	Lamp5	GSM6771745				14475	H2	Pro	OC	Sncg	GSM6676531
	27515	L1	LEC	TC	Sst	GSM6812489				19689	K1	M1C	FC	Lamp5	GSM6771902				1548	A4	A46	FC	Sst	GSM6374521
	27808	L1	LEC	TC	Sst	GSM6812822				9531	E4	MTG	TC	Lamp5	GSM5162894				1126	A3	FI	FC	Vip	GSM6370851
	9051	D4	MTG	TC	Sst	GSM6800325				18567	J2	M1C	FC	Pvalb	GSM5152244				14488	H2	Pro	OC	Sst	GSM6676606
	27902	L1	LEC	TC	Sst	GSM6812927				19206	J2	M1C	FC	Pvalb	GSM5154269				18932	J1	V1C	OC	Vip	GSM6708947
	25653	L1	LEC	TC	Sst	GSM6810378				4348	C2	A44-A45	FC	Lamp5	GSM7302246				4000	C1	DGR	HIP	Sncg	GSM6561667
	26119	L1	LEC	TC	Sst	GSM6810908				4388	C2	A44-A45	FC	Lamp5	GSM7302824				11424	G1	S1C	PC	Vip	GSM6307947
	20015	J1	V1C	OC	Sst	GSM6739782				19705	K1	M1C	FC	Lamp5	GSM6771922				151	A1	MTG	TC	Sst	GSM6336275
	27322	L1	LEC	TC	Sst	GSM6812259				15227	I1	LEC	TC	Lamp5	GSM6785221				16171	H4	A46	FC	Sst	GSM7328100
	23541	K1	FI	FC	Sst	GSM6838064				14044	H2	S1C	PC	Pvalb	GSM5457434				5373	C4	CA1R	HIP	Lamp5	GSM6559554
	21788	J1	V1C	OC	Sst	GSM6741816				16247	I1	LEC	TC	Sncg	GSM6786829				10727	F2	ITG	TC	Sst	GSM6358834
	8992	D4	MTG	TC	Sst	GSM6798735				14010	H2	S1C	PC	Sst	GSM5457290				18269	I3	MTG	TC	Sst	GSM7343764
	22317	J1	V1C	OC	Sst	GSM6742454				20697	K1	M1C	FC	Vip	GSM6773300				13663	H1	MEC	TC	Lamp5	GSM6367749
	9030	D4	MTG	TC	Sst	GSM6800199				4272	C2	A44-A45	FC	Lamp5	GSM7301090				1575	A4	A46	FC	Lamp5	GSM6374624
	25124	K1	FI	FC	Sst	GSM6839769				4245	C2	A44-A45	FC	Sst	GSM7300898				21420	J3	A25	FC	Vip	GSM6344906
	9018	D4	MTG	TC	Sst	GSM6799409				9408	E4	MTG	TC	Sst	GSM5161260				5323	C4	CA1R	HIP	Vip	GSM6557701
	16657	H3	A24	FC	Sst	GSM6870505				23492	M2	LEC	TC	Vip	GSM7154140				8203	E1	A19	OC	Sncg	GSM6330418
	23895	K1	FI	FC	Sst	GSM6838453				21647	L1	M1C	FC	Lamp5	GSM6780766				487	A2	A5-A7	PC	Pvalb	GSM6351680
	8986	D4	MTG	TC	Sst	GSM6799961				16421	I1	LEC	TC	Lamp5	GSM6787092				1045	A3	FI	FC	Sst	GSM6370138
	8257	D3	A46	FC	Sst	GSM6790371				16856	I1	LEC	TC	Lamp5	GSM6787659				18802	J1	V1C	OC	Sncg	GSM6707477
	23260	K1	FI	FC	Sst	GSM6837754				20363	K1	M1C	FC	Pvalb	GSM6772839				13012	G4	LEC	TC	Vip	GSM7318698
	9000	D4	MTG	TC	Sst	GSM6798681				14055	H2	S1C	PC	Sncg	GSM5457484				13176	G4	LEC	TC	Vip	GSM7319831
	16665	H3	A24	FC	Sst	GSM6870522				3667	C1	FI	FC	Sst	GSM7228161				562	A2	A5-A7	PC	Lamp5	GSM6353017
	9046	D4	MTG	TC	Sst	GSM6800391				19801	K1	M1C	FC	Sst	GSM6772052				10659	F2	ITG	TC	Sst	GSM6357788
	24755	K1	FI	FC	Sst	GSM6839367				20452	K1	M1C	FC	Sst	GSM6772976				11410	G1	S1C	PC	Lamp5	GSM6307901
	21272	J1	V1C	OC	Sst	GSM6741205				2987	B4	V1C	OC	Sst	GSM7145035				149	A1	MTG	TC	Lamp5	GSM6336256
	25698	L1	LEC	TC	Sst	GSM6810427				3657	C1	FI	FC	Vip	GSM7228131				5324	C4	CA1R	HIP	Lamp5	GSM6557708
	22208	J1	V1C	OC	Sst	GSM6742331				22391	L2	A1C	TC	Vip	GSM7294232				14629	H2	Pro	OC	Sst	GSM6678392
	27382	L1	LEC	TC	Sst	GSM6812324				19723	K1	M1C	FC	Lamp5	GSM6771943				16147	H4	A46	FC	Sst	GSM7327929
	27855	L1	LEC	TC	Sst	GSM6812873				20048	K1	M1C	FC	Lamp5	GSM6772376				601	A2	A5-A7	PC	Sncg	GSM6354293
	8252	D3	A46	FC	Sst	GSM6791467				11700	F4	CA1R-CA2R-CA3R	HIP	Lamp5	GSM5867813				18746	J1	V1C	OC	Sst	GSM6706985
	19904	J1	V1C	OC	Sst	GSM6739656				21119	K1	M1C	FC	Pvalb	GSM6773888				14462	H2	Pro	OC	Vip	GSM6676461
	25705	L1	LEC	TC	Sst	GSM6810436				17575	J1	MEC	TC	Pvalb	GSM6227310				21116	J3	A25	FC	Vip	GSM6342793
	25463	L1	LEC	TC	Sst	GSM6810173				17941	J1	MEC	TC	Pvalb	GSM6228356				13707	H1	MEC	TC	Lamp5	GSM6367884
	25544	L1	LEC	TC	Sst	GSM6810261				16521	I1	LEC	TC	Lamp5	GSM6787231				13115	G4	LEC	TC	Sncg	GSM7319372
	26264	L1	LEC	TC	Sst	GSM6811082				15275	I1	LEC	TC	Pvalb	GSM6785311				14545	H2	Pro	OC	Lamp5	GSM6677442
	9028	D4	MTG	TC	Sst	GSM6800178				15410	I1	LEC	TC	Pvalb	GSM6785660				20864	J2	A24	FC	Sncg	GSM6363449
	26205	L1	LEC	TC	Sst	GSM6811012				8815	E3	DGR-CA4Rpy	HIP	Sncg	GSM5864220				13565	H1	MEC	TC	Sst	GSM6367164
	23448	K1	FI	FC	Sst	GSM6837962				16822	I1	LEC	TC	Sst	GSM6787614				21260	J3	A25	FC	Sst	GSM6343685
	8285	D3	A46	FC	Sst	GSM6791808				3746	C1	FI	FC	Lamp5	GSM7228615				10594	F2	ITG	TC	Vip	GSM6356470
	25471	L1	LEC	TC	Sst	GSM6810181				20855	K1	M1C	FC	Lamp5	GSM6773521				1090	A3	FI	FC	Sst	GSM6370479
	27512	L1	LEC	TC	Sst	GSM6812486				16526	I1	LEC	TC	Lamp5	GSM6787236				13668	H1	MEC	TC	Vip	GSM6367777
	8234	D3	A46	FC	Sst	GSM6791571				18240	J1	MEC	TC	Lamp5	GSM6228886				14528	H2	Pro	OC	Lamp5	GSM6676917
	24830	K1	FI	FC	Sst	GSM6839446				9463	E4	MTG	TC	Pvalb	GSM5161880				21117	J3	A25	FC	Lamp5	GSM6342794
	4246	C1	A5	PC	Sst	GSM5409909				15170	I1	LEC	TC	Sst	GSM6785121				8194	E1	A19	OC	Lamp5	GSM6330342
	9012	D4	MTG	TC	Sst	GSM6798824				14052	H2	S1C	PC	Pvalb	GSM5457465				1081	A3	FI	FC	Sst	GSM6370446
	9032	D4	MTG	TC	Sst	GSM6798319				17039	I1	LEC	TC	Sncg	GSM6787875				18996	J1	V1C	OC	Pvalb	GSM6709542
	25393	L1	LEC	TC	Sst	GSM6810095				20421	K1	M1C	FC	Lamp5	GSM6772937				13066	G4	LEC	TC	Sncg	GSM7319040
	27419	L1	LEC	TC	Sst	GSM6812381				18542	J2	M1C	FC	Pvalb	GSM5152217				1525	A4	A46	FC	Lamp5	GSM6374376
	26099	L1	LEC	TC	Sst	GSM6810882				15077	I1	LEC	TC	Pvalb	GSM6785006				21206	J3	A25	FC	Pvalb	GSM6343396
	25130	K1	FI	FC	Sst	GSM6839775				15619	I1	LEC	TC	Pvalb	GSM6785981				13070	G4	LEC	TC	Vip	GSM7319076
	25570	L1	LEC	TC	Sst	GSM6810289				17483	J1	MEC	TC	Pvalb	GSM6227136				12962	G4	LEC	TC	Sst	GSM7318424
	23477	K1	FI	FC	Sst	GSM6837995				16879	I1	LEC	TC	Sncg	GSM6787690				16008	H4	A46	FC	Sst	GSM7327098
	25722	L1	LEC	TC	Sst	GSM6810458				13499	H1	A46	FC	Sst	GSM5121113				1102	A3	FI	FC	Sst	GSM6370519
	27284	L1	LEC	TC	Sst	GSM6812217				15130	I1	LEC	TC	Vip	GSM6785072				18971	J1	V1C	OC	Sst	GSM6709241
	27376	L1	LEC	TC	Sst	GSM6812318				11774	F4	CA1R-CA2R-CA3R	HIP	Lamp5	GSM5869749				1037	A3	FI	FC	Pvalb	GSM6370091
	27658	L1	LEC	TC	Sst	GSM6812644				15665	I1	LEC	TC	Lamp5	GSM6786051				13286	G4	LEC	TC	Pvalb	GSM7320465
	23058	K1	FI	FC	Sst	GSM6837537				23502	M2	LEC	TC	Pvalb	GSM7154212				11475	G1	S1C	PC	Sst	GSM6308539
	9044	D4	MTG	TC	Sst	GSM6800319				21160	K1	M1C	FC	Sncg	GSM6773948				13142	G4	LEC	TC	Vip	GSM7319635
	27509	L1	LEC	TC	Sst	GSM6812482				4381	C2	A44-A45	FC	Sst	GSM7302788				13196	G4	LEC	TC	Sncg	GSM7319955
	27869	L1	LEC	TC	Sst	GSM6812888				15045	I1	LEC	TC	Sst	GSM6784962				1590	A4	A46	FC	Vip	GSM6374666
	23475	K1	FI	FC	Sst	GSM6837993				15269	I1	LEC	TC	Sst	GSM6785303				12825	G4	LEC	TC	Pvalb	GSM7317814
	23878	K1	FI	FC	Sst	GSM6838434				18259	J1	MEC	TC	Vip	GSM6228911				11640	G1	S1C	PC	Sst	GSM6310016
	23974	K1	FI	FC	Sst	GSM6838536				15515	I1	LEC	TC	Lamp5	GSM6785810				13127	G4	LEC	TC	Pvalb	GSM7319453
	24429	K1	FI	FC	Sst	GSM6839016				16354	I1	LEC	TC	Lamp5	GSM6786965				24	A1	MTG	TC	Pvalb	GSM6333704
	25464	L1	LEC	TC	Sst	GSM6810174				16551	I1	LEC	TC	Lamp5	GSM6787262				2894	B3	DGC	HIP	Sncg	GSM6524351
	21212	J1	V1C	OC	Sst	GSM6741140				20938	K1	M1C	FC	Sst	GSM6773635				998	A3	FI	FC	Sncg	GSM6369724
	9045	D4	MTG	TC	Sst	GSM6800350				3622	C1	FI	FC	Vip	GSM7227163				18987	J1	V1C	OC	Vip	GSM6709458
	8293	D3	A46	FC	Sst	GSM6791889				19769	K1	M1C	FC	Vip	GSM6772004				1049	A3	FI	FC	Pvalb	GSM6370143
	20029	J1	V1C	OC	Sst	GSM6739799				15455	I1	LEC	TC	Pvalb	GSM6785738				13018	G4	LEC	TC	Lamp5	GSM7318734
	4268	C1	A5	PC	Sst	GSM5410303				20861	K1	M1C	FC	Sst	GSM6773528				13089	G4	LEC	TC	Vip	GSM7319253
	9005	D4	MTG	TC	Sst	GSM6800329				20605	K1	M1C	FC	Vip	GSM6773172				18327	I3	MTG	TC	Vip	GSM7344538
	9036	D4	MTG	TC	Sst	GSM6799563				20886	K1	M1C	FC	Vip	GSM6773562				13314	G4	LEC	TC	Sst	GSM7320677
	23137	K1	FI	FC	Sst	GSM6837620				23449	M2	LEC	TC	Vip	GSM7153501				13163	G4	LEC	TC	Lamp5	GSM7319718
	23172	K1	FI	FC	Sst	GSM6837657				4403	C2	A44-A45	FC	Lamp5	GSM7302914				20846	J2	A24	FC	Sst	GSM6363257
	26079	L1	LEC	TC	Sst	GSM6810860				15592	I1	LEC	TC	Sst	GSM6785939				11589	G1	S1C	PC	Vip	GSM6309062
	27434	L1	LEC	TC	Sst	GSM6812397				18688	J2	M1C	FC	Vip	GSM5152500				11495	G1	S1C	PC	Sncg	GSM6308647
	8989	D4	MTG	TC	Sst	GSM6800200				4248	C2	A44-A45	FC	Pvalb	GSM7300916				20880	J2	A24	FC	Sst	GSM6363616
	27089	L1	LEC	TC	Sst	GSM6812000				15196	I1	LEC	TC	Pvalb	GSM6785161				1585	A4	A46	FC	Pvalb	GSM6374651
	19722	J1	V1C	OC	Sst	GSM6739458				15341	I1	LEC	TC	Pvalb	GSM6785450				14516	H2	Pro	OC	Lamp5	GSM6676812
	25374	L1	LEC	TC	Sst	GSM6810074				16210	I1	LEC	TC	Pvalb	GSM6786779				22134	K1	CA1C	HIP	Sncg	GSM6521599
	22022	J1	V1C	OC	Sst	GSM6742071				4391	C2	A44-A45	FC	Sncg	GSM7302837				1121	A3	FI	FC	Pvalb	GSM6370827
	8983	D4	MTG	TC	Sst	GSM6799541				11674	F4	CA1R-CA2R-CA3R	HIP	Sncg	GSM5867592				18993	J1	V1C	OC	Vip	GSM6709516
	26825	L1	LEC	TC	Sst	GSM6811709				16808	I1	LEC	TC	Vip	GSM6787593				18992	J1	V1C	OC	Vip	GSM6709512
	27669	L1	LEC	TC	Sst	GSM6812656				20277	K1	M1C	FC	Lamp5	GSM6772670				529	A2	A5-A7	PC	Sst	GSM6352502
	1246	A3	CA1C	HIP	Sst	GSM6159681				20153	K1	M1C	FC	Sst	GSM6772504				10726	F2	ITG	TC	Sncg	GSM6358831
	22320	J1	V1C	OC	Sst	GSM6742457				16882	I1	LEC	TC	Sst	GSM6787694				12889	G4	LEC	TC	Sst	GSM7318113
	27068	L1	LEC	TC	Sst	GSM6811978				19592	K1	M1C	FC	Lamp5	GSM6771777				588	A2	A5-A7	PC	Sst	GSM6353993
	23790	K1	FI	FC	Sst	GSM6838335				14111	H2	S1C	PC	Pvalb	GSM5457973				18453	I3	MTG	TC	Sst	GSM7346153
	24650	K1	FI	FC	Sst	GSM6839260				16986	I1	LEC	TC	Sncg	GSM6787815				1009	A3	FI	FC	Pvalb	GSM6369801
	25227	K1	FI	FC	Sst	GSM6839877				19732	K1	M1C	FC	Sst	GSM6771954				13244	G4	LEC	TC	Lamp5	GSM7320142
	24909	K1	FI	FC	Sst	GSM6839534				16364	I1	LEC	TC	Sst	GSM6786977				13269	G4	LEC	TC	Vip	GSM7320337
	24274	K1	FI	FC	Sst	GSM6838852				13504	H1	A46	FC	Vip	GSM5121127				11654	G1	S1C	PC	Pvalb	GSM6310087
	24326	K1	FI	FC	Sst	GSM6838907				19061	J2	M1C	FC	Vip	GSM5153940				19016	J1	V1C	OC	Sst	GSM6709675
	4229	C1	A5	PC	Sst	GSM5409680				15417	I1	LEC	TC	Vip	GSM6785683				12932	G4	LEC	TC	Vip	GSM7318259
	24765	K1	FI	FC	Sst	GSM6839378				16652	I1	LEC	TC	Vip	GSM6787404				16060	H4	A46	FC	Pvalb	GSM7327402
	23638	K1	FI	FC	Sst	GSM6838171				21982	L2	A1C	TC	Lamp5	GSM7292453				1598	A4	A46	FC	Pvalb	GSM6374683
	8981	D4	MTG	TC	Sst	GSM6798673				3841	C1	FI	FC	Pvalb	GSM7229545				1559	A4	A46	FC	Lamp5	GSM6374565
	23768	K1	FI	FC	Sst	GSM6838312				3827	C1	FI	FC	Sncg	GSM7229414				18863	J1	V1C	OC	Sst	GSM6708217
	4166	C1	A5	PC	Sst	GSM5408093				16941	I1	LEC	TC	Sncg	GSM6787766				179	A1	MTG	TC	Sst	GSM6336476
	25708	L1	LEC	TC	Sst	GSM6810439				2959	B4	V1C	OC	Vip	GSM7193254				10746	F2	ITG	TC	Lamp5	GSM6358894
	26747	L1	LEC	TC	Sst	GSM6811613				3675	C1	FI	FC	Pvalb	GSM7228190				1497	A4	A46	FC	Vip	GSM6374135
	27455	L1	LEC	TC	Sst	GSM6812421				4326	C2	A44-A45	FC	Pvalb	GSM7302141				2533	B2	A44-A45	FC	Sst	GSM6406082
	8237	D3	A46	FC	Sst	GSM6789144				9433	E4	MTG	TC	Pvalb	GSM5161402				75	A1	MTG	TC	Sst	GSM6335436
	24327	K1	FI	FC	Sst	GSM6838908				2419	B2	A19	OC	Sncg	GSM7193059				1518	A4	A46	FC	Lamp5	GSM6374319
	25068	K1	FI	FC	Sst	GSM6839707				15509	I1	LEC	TC	Sncg	GSM6785803				16	A1	MTG	TC	Sst	GSM6333640
	9058	D4	MTG	TC	Sst	GSM6800204				19439	J3	A24	FC	Sst	GSM6874800				1693	A4	A46	FC	Lamp5	GSM6376157
	16772	H4	LEC	TC	Sst	GSM7149223				3775	C1	FI	FC	Vip	GSM7229045				18972	J1	V1C	OC	Sst	GSM6709259
	26028	L1	LEC	TC	Sst	GSM6810803				15016	I1	LEC	TC	Vip	GSM6784919				1586	A4	A46	FC	Sst	GSM6374653
	27693	L1	LEC	TC	Sst	GSM6812682				18431	J1	MEC	TC	Vip	GSM6229214				20734	J2	A24	FC	Vip	GSM6361512
	23407	K1	FI	FC	Sst	GSM6837918				16103	I1	LEC	TC	Lamp5	GSM6786637				10701	F2	ITG	TC	Sst	GSM6358496
[truncated: 848 more rows]

## Sheet: for cortex_excitatory neurons
	H01_ID	array	Region	cortex	MT	H01				H02_ID	array	Region	cortex	MT	H02				H04_ID	array	MR	cortex	MT	H04
	8802	D3	A46	FC	L4_6	GSM6791142				18239	J1	MEC	TC	L2-IT	GSM6228885				211	A1	cortex	TC	L4_6	GSM6333561
	5449	C2	ITG	TC	L4_6	GSM6146307				16078	I1	LEC	TC	L2-IT	GSM6786608				213	A1	cortex	TC	L4_6	GSM6333565
	25506	L1	LEC	TC	L2/3-IT	GSM6810218				793	A2	ITG	TC	L4	GSM6167791				214	A1	cortex	TC	L4_6	GSM6333568
	8872	D3	A46	FC	L4_6	GSM6791803				1021	A2	ITG	TC	L2-IT	GSM6168873				222	A1	cortex	TC	L4_6	GSM6333602
	8892	D3	A46	FC	L4_6	GSM6791491				23427	M2	LEC	TC	L4	GSM7153360				242	A1	cortex	TC	L4_6	GSM6333679
	8873	D3	A46	FC	L4_6	GSM6791979				16767	I1	LEC	TC	L2-IT	GSM6787539				254	A1	cortex	TC	L4_6	GSM6333832
	8705	D3	A46	FC	L4_6	GSM6791550				9600	E4	MTG	TC	L4	GSM5160202				258	A1	cortex	TC	L2/3-IT	GSM6333865
	8647	D3	A46	FC	L4_6	GSM6791349				15199	I1	LEC	TC	L2-IT	GSM6785164				291	A1	cortex	TC	L4_6	GSM6334152
	16308	H3	A24	FC	L2/3-IT	GSM6869177				23812	M2	LEC	TC	L4	GSM7155914				303	A1	cortex	TC	L2/3-IT	GSM6334236
	16521	H3	A24	FC	L4_6	GSM6870067				16695	I1	LEC	TC	L2-IT	GSM6787449				319	A1	cortex	TC	L4_6	GSM6334564
	26340	L1	LEC	TC	L4_6	GSM6811172				9650	E4	MTG	TC	L4	GSM5160569				322	A1	cortex	TC	L4_6	GSM6334852
	26523	L1	LEC	TC	L2/3-IT	GSM6811369				16887	I1	LEC	TC	L2-IT	GSM6787700				323	A1	cortex	TC	L4_6	GSM6334885
	22217	J1	V1C	OC	L4_6	GSM6742343				16528	I1	LEC	TC	L4	GSM6787238				331	A1	cortex	TC	L4_6	GSM6335241
	8881	D3	A46	FC	L4_6	GSM6791279				17096	I1	LEC	TC	L2-IT	GSM6787941				342	A1	cortex	TC	L2/3-IT	GSM6335413
	5438	C2	ITG	TC	L4_6	GSM6149022				9942	E4	MTG	TC	L4	GSM5162483				361	A1	cortex	TC	L4_6	GSM6335541
	16801	H4	LEC	TC	L2/3-IT	GSM7149261				16076	I1	LEC	TC	L4	GSM6786606				366	A1	cortex	TC	L2/3-IT	GSM6335560
	26561	L1	LEC	TC	L4_6	GSM6811409				16672	I1	LEC	TC	L4	GSM6787425				372	A1	cortex	TC	L4_6	GSM6335572
	27238	L1	LEC	TC	L2/3-IT	GSM6812166				9690	E4	MTG	TC	L4	GSM5160937				383	A1	cortex	TC	L2/3-IT	GSM6335628
	26348	L1	LEC	TC	L2/3-IT	GSM6811181				9925	E4	MTG	TC	L4	GSM5162430				388	A1	cortex	TC	L2/3-IT	GSM6335665
	26403	L1	LEC	TC	L4_6	GSM6811239				9652	E4	MTG	TC	L4	GSM5160573				409	A1	cortex	TC	L4_6	GSM6335826
	26361	L1	LEC	TC	L2/3-IT	GSM6811196				16666	I1	LEC	TC	L4	GSM6787418				431	A1	cortex	TC	L4_6	GSM6336175
	26548	L1	LEC	TC	L4_6	GSM6811395				9849	E4	MTG	TC	L4	GSM5161776				438	A1	cortex	TC	L4_6	GSM6336192
	26375	L1	LEC	TC	L2/3-IT	GSM6811211				10040	E4	MTG	TC	L2-IT	GSM5163257				439	A1	cortex	TC	L2/3-IT	GSM6336193
	26476	L1	LEC	TC	L4_6	GSM6811320				9957	E4	MTG	TC	L2-IT	GSM5162617				440	A1	cortex	TC	L2/3-IT	GSM6336203
	26576	L1	LEC	TC	L4_6	GSM6811425				23673	M2	LEC	TC	L2-IT	GSM7155163				441	A1	cortex	TC	L4_6	GSM6336204
	26404	L1	LEC	TC	L4_6	GSM6811240				9649	E4	MTG	TC	L2-IT	GSM5160568				442	A1	cortex	TC	L2/3-IT	GSM6336205
	26407	L1	LEC	TC	L4_6	GSM6811243				16712	I1	LEC	TC	L4	GSM6787470				458	A1	cortex	TC	L2/3-IT	GSM6336279
	8888	D3	A46	FC	L4_6	GSM6791222				9982	E4	MTG	TC	L2-IT	GSM5162870				465	A1	cortex	TC	L4_6	GSM6336317
	26564	L1	LEC	TC	L4_6	GSM6811412				16697	I1	LEC	TC	L2-IT	GSM6787452				673	A2	cortex	PC	L4_6	GSM6351683
	26639	L1	LEC	TC	L4_6	GSM6811496				16348	I1	LEC	TC	L2-IT	GSM6786959				683	A2	cortex	PC	L4_6	GSM6351722
	8689	D3	A46	FC	L4_6	GSM6791088				21836	L2	A1C	TC	L2-IT	GSM7292065				696	A2	cortex	PC	L4_6	GSM6351842
	26510	L1	LEC	TC	L2/3-IT	GSM6811356				9621	E4	MTG	TC	L4	GSM5160483				704	A2	cortex	PC	L4_6	GSM6351861
	26569	L1	LEC	TC	L2/3-IT	GSM6811418				16127	I1	LEC	TC	L4	GSM6786668				706	A2	cortex	PC	L4_6	GSM6351868
	26587	L1	LEC	TC	L2/3-IT	GSM6811436				23695	M2	LEC	TC	L2-IT	GSM7155223				758	A2	cortex	PC	L2/3-IT	GSM6352174
	26406	L1	LEC	TC	L4_6	GSM6811242				9660	E4	MTG	TC	L2-IT	GSM5160738				765	A2	cortex	PC	L2/3-IT	GSM6352235
	27231	L1	LEC	TC	L2/3-IT	GSM6812157				10039	E4	MTG	TC	L4	GSM5163256				767	A2	cortex	PC	L2/3-IT	GSM6352340
	26319	L1	LEC	TC	L2/3-IT	GSM6811149				16681	I1	LEC	TC	L4	GSM6787434				786	A2	cortex	PC	L2/3-IT	GSM6352699
	21252	J1	V1C	OC	L2/3-IT	GSM6741183				16646	I1	LEC	TC	L2-IT	GSM6787398				798	A2	cortex	PC	L4_6	GSM6352749
	26339	L1	LEC	TC	L2/3-IT	GSM6811171				9697	E4	MTG	TC	L2-IT	GSM5160952				799	A2	cortex	PC	L4_6	GSM6352752
	27280	L1	LEC	TC	L2/3-IT	GSM6812213				1027	A2	ITG	TC	L4	GSM6169176				802	A2	cortex	PC	L2/3-IT	GSM6352808
	26347	L1	LEC	TC	L4_6	GSM6811179				17839	J1	MEC	TC	L4	GSM6228108				805	A2	cortex	PC	L2/3-IT	GSM6352820
	26588	L1	LEC	TC	L4_6	GSM6811437				9941	E4	MTG	TC	L2-IT	GSM5162478				807	A2	cortex	PC	L2/3-IT	GSM6352828
	25830	L1	LEC	TC	L4_6	GSM6810573				9670	E4	MTG	TC	L4	GSM5160827				810	A2	cortex	PC	L4_6	GSM6352839
	16654	H3	A24	FC	L4_6	GSM6870500				16088	I1	LEC	TC	L2-IT	GSM6786618				815	A2	cortex	PC	L2/3-IT	GSM6352847
	26907	L1	LEC	TC	L4_6	GSM6811797				16064	I1	LEC	TC	L4	GSM6786594				818	A2	cortex	PC	L2/3-IT	GSM6352857
	26532	L1	LEC	TC	L2/3-IT	GSM6811379				1020	A2	ITG	TC	L2-IT	GSM6168871				820	A2	cortex	PC	L4_6	GSM6352861
	26365	L1	LEC	TC	L2/3-IT	GSM6811201				16927	I1	LEC	TC	L4	GSM6787746				822	A2	cortex	PC	L2/3-IT	GSM6352866
	26560	L1	LEC	TC	L2/3-IT	GSM6811408				16765	I1	LEC	TC	L2-IT	GSM6787536				824	A2	cortex	PC	L2/3-IT	GSM6352878
	26480	L1	LEC	TC	L2/3-IT	GSM6811325				16665	I1	LEC	TC	L2-IT	GSM6787417				828	A2	cortex	PC	L4_6	GSM6352889
	26766	L1	LEC	TC	L2/3-IT	GSM6811639				17085	I1	LEC	TC	L2-IT	GSM6787928				829	A2	cortex	PC	L2/3-IT	GSM6352890
	26481	L1	LEC	TC	L4_6	GSM6811326				16651	I1	LEC	TC	L2-IT	GSM6787403				831	A2	cortex	PC	L4_6	GSM6352897
	26333	L1	LEC	TC	L4_6	GSM6811165				17106	I1	LEC	TC	L2-IT	GSM6787952				832	A2	cortex	PC	L4_6	GSM6352899
	26446	L1	LEC	TC	L2/3-IT	GSM6811287				9783	E4	MTG	TC	L4	GSM5161340				833	A2	cortex	PC	L4_6	GSM6352900
	26295	L1	LEC	TC	L2/3-IT	GSM6811120				17034	I1	LEC	TC	L4	GSM6787870				834	A2	cortex	PC	L4_6	GSM6352901
	26496	L1	LEC	TC	L2/3-IT	GSM6811341				16684	I1	LEC	TC	L4	GSM6787437				839	A2	cortex	PC	L4_6	GSM6352914
	26426	L1	LEC	TC	L2/3-IT	GSM6811265				17082	I1	LEC	TC	L2-IT	GSM6787925				841	A2	cortex	PC	L2/3-IT	GSM6352925
	25799	L1	LEC	TC	L4_6	GSM6810541				16693	I1	LEC	TC	L4	GSM6787447				844	A2	cortex	PC	L4_6	GSM6352932
	26504	L1	LEC	TC	L2/3-IT	GSM6811349				16116	I1	LEC	TC	L2-IT	GSM6786654				846	A2	cortex	PC	L2/3-IT	GSM6353013
	26415	L1	LEC	TC	L2/3-IT	GSM6811251				16539	I1	LEC	TC	L2-IT	GSM6787250				850	A2	cortex	PC	L4_6	GSM6353051
	26417	L1	LEC	TC	L4_6	GSM6811254				17079	I1	LEC	TC	L2-IT	GSM6787920				886	A2	cortex	PC	L2/3-IT	GSM6353458
	26472	L1	LEC	TC	L4_6	GSM6811316				15213	I1	LEC	TC	L4	GSM6785193				888	A2	cortex	PC	L2/3-IT	GSM6353553
	26353	L1	LEC	TC	L4_6	GSM6811187				21959	L2	A1C	TC	L4	GSM7292394				906	A2	cortex	PC	L4_6	GSM6353899
	26598	L1	LEC	TC	L2/3-IT	GSM6811448				16547	I1	LEC	TC	L2-IT	GSM6787258				919	A2	cortex	PC	L4_6	GSM6353989
	26360	L1	LEC	TC	L2/3-IT	GSM6811195				15977	I1	LEC	TC	L4	GSM6786474				952	A2	cortex	PC	L4_6	GSM6354391
	4748	C1	A5-A7	PC	L4_6	GSM5408375				16448	I1	LEC	TC	L2-IT	GSM6787120				1252	A3	cortex	FC	L4_6	GSM6369375
	26500	L1	LEC	TC	L4_6	GSM6811345				16700	I1	LEC	TC	L2-IT	GSM6787456				1256	A3	cortex	FC	L4_6	GSM6369615
	26412	L1	LEC	TC	L4_6	GSM6811248				16730	I1	LEC	TC	L2-IT	GSM6787492				1257	A3	cortex	FC	L2/3-IT	GSM6369616
	13308	F4	CA1R	HIP	L4_6	GSM5881687				9725	E4	MTG	TC	L4	GSM5161137				1258	A3	cortex	FC	L2/3-IT	GSM6369617
	27227	L1	LEC	TC	L2/3-IT	GSM6812151				9935	E4	MTG	TC	L2-IT	GSM5162464				1259	A3	cortex	FC	L4_6	GSM6369618
	27211	L1	LEC	TC	L4_6	GSM6812135				16185	I1	LEC	TC	L4	GSM6786744				1261	A3	cortex	FC	L4_6	GSM6369621
	25831	L1	LEC	TC	L4_6	GSM6810574				16084	I1	LEC	TC	L4	GSM6786614				1263	A3	cortex	FC	L4_6	GSM6369626
	25825	L1	LEC	TC	L2/3-IT	GSM6810568				16669	I1	LEC	TC	L2-IT	GSM6787421				1264	A3	cortex	FC	L2/3-IT	GSM6369628
	26646	L1	LEC	TC	L2/3-IT	GSM6811503				9695	E4	MTG	TC	L4	GSM5160948				1265	A3	cortex	FC	L2/3-IT	GSM6369630
	27616	L1	LEC	TC	L2/3-IT	GSM6812600				9833	E4	MTG	TC	L4	GSM5161707				1268	A3	cortex	FC	L4_6	GSM6369634
	26400	L1	LEC	TC	L2/3-IT	GSM6811236				9603	E4	MTG	TC	L2-IT	GSM5160222				1269	A3	cortex	FC	L4_6	GSM6369635
	26474	L1	LEC	TC	L2/3-IT	GSM6811318				16692	I1	LEC	TC	L2-IT	GSM6787446				1272	A3	cortex	FC	L4_6	GSM6369641
	26592	L1	LEC	TC	L2/3-IT	GSM6811442				9631	E4	MTG	TC	L4	GSM5160508				1273	A3	cortex	FC	L4_6	GSM6369643
	25802	L1	LEC	TC	L2/3-IT	GSM6810544				16509	I1	LEC	TC	L2-IT	GSM6787218				1274	A3	cortex	FC	L4_6	GSM6369645
	19888	J1	V1C	OC	L2/3-IT	GSM6739637				16097	I1	LEC	TC	L2-IT	GSM6786629				1275	A3	cortex	FC	L2/3-IT	GSM6369647
	26534	L1	LEC	TC	L4_6	GSM6811381				15108	I1	LEC	TC	L2-IT	GSM6785047				1276	A3	cortex	FC	L4_6	GSM6369649
	26386	L1	LEC	TC	L2/3-IT	GSM6811222				16907	I1	LEC	TC	L2-IT	GSM6787724				1279	A3	cortex	FC	L4_6	GSM6369655
	26582	L1	LEC	TC	L4_6	GSM6811431				9958	E4	MTG	TC	L4	GSM5162618				1286	A3	cortex	FC	L2/3-IT	GSM6369668
	26591	L1	LEC	TC	L2/3-IT	GSM6811441				16105	I1	LEC	TC	L2-IT	GSM6786639				1287	A3	cortex	FC	L2/3-IT	GSM6369670
	25845	L1	LEC	TC	L4_6	GSM6810592				10029	E4	MTG	TC	L4	GSM5163232				1288	A3	cortex	FC	L2/3-IT	GSM6369672
	26355	L1	LEC	TC	L2/3-IT	GSM6811189				9644	E4	MTG	TC	L2-IT	GSM5160561				1289	A3	cortex	FC	L4_6	GSM6369676
	26786	L1	LEC	TC	L2/3-IT	GSM6811663				16708	I1	LEC	TC	L2-IT	GSM6787465				1291	A3	cortex	FC	L4_6	GSM6369680
	26345	L1	LEC	TC	L4_6	GSM6811177				9931	E4	MTG	TC	L4	GSM5162447				1299	A3	cortex	FC	L4_6	GSM6369714
	26432	L1	LEC	TC	L2/3-IT	GSM6811271				15834	I1	LEC	TC	L4	GSM6786286				1305	A3	cortex	FC	L2/3-IT	GSM6369740
	26466	L1	LEC	TC	L4_6	GSM6811308				16656	I1	LEC	TC	L2-IT	GSM6787408				1330	A3	cortex	FC	L4_6	GSM6369963
	26898	L1	LEC	TC	L2/3-IT	GSM6811787				16690	I1	LEC	TC	L2-IT	GSM6787443				1331	A3	cortex	FC	L4_6	GSM6369966
	26880	L1	LEC	TC	L2/3-IT	GSM6811769				16501	I1	LEC	TC	L2-IT	GSM6787209				1332	A3	cortex	FC	L2/3-IT	GSM6369972
	27282	L1	LEC	TC	L2/3-IT	GSM6812215				16791	I1	LEC	TC	L4	GSM6787570				1344	A3	cortex	FC	L2/3-IT	GSM6370026
	27249	L1	LEC	TC	L4_6	GSM6812178				18279	J1	MEC	TC	L4	GSM6228934				1345	A3	cortex	FC	L2/3-IT	GSM6370049
	26354	L1	LEC	TC	L2/3-IT	GSM6811188				17490	J1	MEC	TC	L4	GSM6227152				1348	A3	cortex	FC	L2/3-IT	GSM6370053
	26645	L1	LEC	TC	L2/3-IT	GSM6811502				9702	E4	MTG	TC	L2-IT	GSM5161005				1352	A3	cortex	FC	L4_6	GSM6370075
	26535	L1	LEC	TC	L2/3-IT	GSM6811382				9646	E4	MTG	TC	L4	GSM5160565				1355	A3	cortex	FC	L2/3-IT	GSM6370083
	16317	H3	A24	FC	L4_6	GSM6869192				17041	I1	LEC	TC	L4	GSM6787877				1373	A3	cortex	FC	L4_6	GSM6370197
	26566	L1	LEC	TC	L2/3-IT	GSM6811415				17040	I1	LEC	TC	L2-IT	GSM6787876				1377	A3	cortex	FC	L4_6	GSM6370311
	16367	H3	A24	FC	L2/3-IT	GSM6869339				15179	I1	LEC	TC	L2-IT	GSM6785134				1383	A3	cortex	FC	L2/3-IT	GSM6370340
	26903	L1	LEC	TC	L2/3-IT	GSM6811792				17021	I1	LEC	TC	L2-IT	GSM6787855				1392	A3	cortex	FC	L4_6	GSM6370368
	27247	L1	LEC	TC	L2/3-IT	GSM6812175				16530	I1	LEC	TC	L2-IT	GSM6787240				1403	A3	cortex	FC	L4_6	GSM6370470
	8880	D3	A46	FC	L4_6	GSM6791069				16928	I1	LEC	TC	L4	GSM6787747				1422	A3	cortex	FC	L4_6	GSM6370603
	27251	L1	LEC	TC	L4_6	GSM6812180				9758	E4	MTG	TC	L4	GSM5161271				1424	A3	cortex	FC	L2/3-IT	GSM6370622
	26317	L1	LEC	TC	L4_6	GSM6811147				9678	E4	MTG	TC	L2-IT	GSM5160893				1434	A3	cortex	FC	L4_6	GSM6370668
	16534	H3	A24	FC	L2/3-IT	GSM6870114				16930	I1	LEC	TC	L2-IT	GSM6787749				1440	A3	cortex	FC	L4_6	GSM6370721
	25922	L1	LEC	TC	L4_6	GSM6810686				9995	E4	MTG	TC	L4	GSM5163131				1446	A3	cortex	FC	L2/3-IT	GSM6370805
	25841	L1	LEC	TC	L2/3-IT	GSM6810587				17090	I1	LEC	TC	L2-IT	GSM6787935				1456	A3	cortex	FC	L4_6	GSM6370832
	26452	L1	LEC	TC	L4_6	GSM6811294				10027	E4	MTG	TC	L4	GSM5163224				1468	A3	cortex	FC	L4_6	GSM6370902
	26877	L1	LEC	TC	L2/3-IT	GSM6811766				9889	E4	MTG	TC	L2-IT	GSM5162138				1469	A3	cortex	FC	L4_6	GSM6370969
	27595	L1	LEC	TC	L2/3-IT	GSM6812577				15825	I1	LEC	TC	L4	GSM6786277				1472	A3	cortex	FC	L4_6	GSM6371106
	27176	L1	LEC	TC	L4_6	GSM6812098				15993	I1	LEC	TC	L2-IT	GSM6786491				1477	A3	cortex	FC	L4_6	GSM6371391
	26536	L1	LEC	TC	L2/3-IT	GSM6811383				16773	I1	LEC	TC	L4	GSM6787546				1480	A3	cortex	FC	L4_6	GSM6371452
	27252	L1	LEC	TC	L2/3-IT	GSM6812181				17080	I1	LEC	TC	L4	GSM6787921				1488	A3	cortex	FC	L4_6	GSM6371711
	26577	L1	LEC	TC	L4_6	GSM6811426				17062	I1	LEC	TC	L2-IT	GSM6787900				1490	A3	cortex	FC	L4_6	GSM6371752
	26409	L1	LEC	TC	L4_6	GSM6811245				9656	E4	MTG	TC	L4	GSM5160695				1493	A3	cortex	FC	L2/3-IT	GSM6371780
	26478	L1	LEC	TC	L4_6	GSM6811322				9774	E4	MTG	TC	L2-IT	GSM5161321				1495	A3	cortex	FC	L4_6	GSM6371835
	26408	L1	LEC	TC	L2/3-IT	GSM6811244				17088	I1	LEC	TC	L2-IT	GSM6787933				1786	A4	cortex	FC	L2/3-IT	GSM6374330
	26390	L1	LEC	TC	L2/3-IT	GSM6811226				9637	E4	MTG	TC	L4	GSM5160524				1787	A4	cortex	FC	L2/3-IT	GSM6374349
	26609	L1	LEC	TC	L2/3-IT	GSM6811463				9771	E4	MTG	TC	L2-IT	GSM5161315				1794	A4	cortex	FC	L4_6	GSM6374399
	26484	L1	LEC	TC	L2/3-IT	GSM6811329				16025	I1	LEC	TC	L2-IT	GSM6786542				1795	A4	cortex	FC	L4_6	GSM6374403
	27217	L1	LEC	TC	L2/3-IT	GSM6812141				16683	I1	LEC	TC	L2-IT	GSM6787436				1830	A4	cortex	FC	L2/3-IT	GSM6374568
	26495	L1	LEC	TC	L4_6	GSM6811340				16445	I1	LEC	TC	L4	GSM6787117				1835	A4	cortex	FC	L2/3-IT	GSM6374580
	26469	L1	LEC	TC	L4_6	GSM6811311				15492	I1	LEC	TC	L4	GSM6785784				1836	A4	cortex	FC	L2/3-IT	GSM6374582
	26378	L1	LEC	TC	L2/3-IT	GSM6811214				9997	E4	MTG	TC	L2-IT	GSM5163135				1842	A4	cortex	FC	L4_6	GSM6374598
	27610	L1	LEC	TC	L4_6	GSM6812594				16660	I1	LEC	TC	L2-IT	GSM6787412				1855	A4	cortex	FC	L2/3-IT	GSM6374638
	26773	L1	LEC	TC	L2/3-IT	GSM6811646				9778	E4	MTG	TC	L4	GSM5161329				1861	A4	cortex	FC	L2/3-IT	GSM6374648
	26963	L1	LEC	TC	L4_6	GSM6811864				16166	I1	LEC	TC	L2-IT	GSM6786716				1862	A4	cortex	FC	L4_6	GSM6374650
	24291	K1	FI	FC	L2/3-IT	GSM6838871				15915	I1	LEC	TC	L2-IT	GSM6786400				1863	A4	cortex	FC	L4_6	GSM6374656
	26228	L1	LEC	TC	L2/3-IT	GSM6811040				15823	I1	LEC	TC	L2-IT	GSM6786273				1866	A4	cortex	FC	L2/3-IT	GSM6374662
	27621	L1	LEC	TC	L2/3-IT	GSM6812607				15957	I1	LEC	TC	L4	GSM6786450				1867	A4	cortex	FC	L4_6	GSM6374664
	26558	L1	LEC	TC	L4_6	GSM6811406				15976	I1	LEC	TC	L4	GSM6786472				1873	A4	cortex	FC	L4_6	GSM6374692
	26600	L1	LEC	TC	L4_6	GSM6811451				9939	E4	MTG	TC	L2-IT	GSM5162474				1908	A4	cortex	FC	L2/3-IT	GSM6374930
	26952	L1	LEC	TC	L2/3-IT	GSM6811850				10019	E4	MTG	TC	L2-IT	GSM5163205				1916	A4	cortex	FC	L4_6	GSM6375065
	26511	L1	LEC	TC	L2/3-IT	GSM6811357				17020	I1	LEC	TC	L2-IT	GSM6787854				1922	A4	cortex	FC	L2/3-IT	GSM6375143
	25813	L1	LEC	TC	L2/3-IT	GSM6810555				17070	I1	LEC	TC	L2-IT	GSM6787909				1932	A4	cortex	FC	L4_6	GSM6375206
	23575	K1	FI	FC	L4_6	GSM6838100				9599	E4	MTG	TC	L4	GSM5160199				1933	A4	cortex	FC	L4_6	GSM6375242
	25915	L1	LEC	TC	L4_6	GSM6810678				16073	I1	LEC	TC	L2-IT	GSM6786603				1937	A4	cortex	FC	L4_6	GSM6375304
	26425	L1	LEC	TC	L4_6	GSM6811264				16414	I1	LEC	TC	L2-IT	GSM6787077				1939	A4	cortex	FC	L4_6	GSM6375346
	26623	L1	LEC	TC	L4_6	GSM6811478				10018	E4	MTG	TC	L4	GSM5163204				1960	A4	cortex	FC	L4_6	GSM6375517
	26465	L1	LEC	TC	L2/3-IT	GSM6811307				9775	E4	MTG	TC	L4	GSM5161322				1970	A4	cortex	FC	L4_6	GSM6375746
	26341	L1	LEC	TC	L4_6	GSM6811173				9680	E4	MTG	TC	L2-IT	GSM5160917				1972	A4	cortex	FC	L4_6	GSM6375839
	27155	L1	LEC	TC	L2/3-IT	GSM6812077				16407	I1	LEC	TC	L2-IT	GSM6787068				1989	A4	cortex	FC	L4_6	GSM6376025
	27119	L1	LEC	TC	L2/3-IT	GSM6812034				17022	I1	LEC	TC	L2-IT	GSM6787856				1998	A4	cortex	FC	L4_6	GSM6376413
	27207	L1	LEC	TC	L2/3-IT	GSM6812131				10012	E4	MTG	TC	L4	GSM5163190				2761	B2	cortex	FC	L4_6	GSM6405125
	25898	L1	LEC	TC	L2/3-IT	GSM6810659				17112	I1	LEC	TC	L2-IT	GSM6787960				2771	B2	cortex	FC	L2/3-IT	GSM6406028
	26336	L1	LEC	TC	L4_6	GSM6811168				9676	E4	MTG	TC	L4	GSM5160886				2772	B2	cortex	FC	L2/3-IT	GSM6406029
	26470	L1	LEC	TC	L4_6	GSM6811312				16128	I1	LEC	TC	L4	GSM6786669				2773	B2	cortex	FC	L2/3-IT	GSM6406030
	26812	L1	LEC	TC	L2/3-IT	GSM6811693				9844	E4	MTG	TC	L2-IT	GSM5161752				2774	B2	cortex	FC	L4_6	GSM6406031
	25636	L1	LEC	TC	L4_6	GSM6810359				15370	I1	LEC	TC	L2-IT	GSM6785608				2776	B2	cortex	FC	L2/3-IT	GSM6406033
	26394	L1	LEC	TC	L4_6	GSM6811230				10030	E4	MTG	TC	L4	GSM5163235				2777	B2	cortex	FC	L4_6	GSM6406035
	25843	L1	LEC	TC	L2/3-IT	GSM6810589				9683	E4	MTG	TC	L2-IT	GSM5160924				2778	B2	cortex	FC	L2/3-IT	GSM6406038
	27246	L1	LEC	TC	L2/3-IT	GSM6812174				9653	E4	MTG	TC	L2-IT	GSM5160578				2779	B2	cortex	FC	L4_6	GSM6406039
	24039	K1	FI	FC	L2/3-IT	GSM6838603				9883	E4	MTG	TC	L2-IT	GSM5162103				2780	B2	cortex	FC	L4_6	GSM6406041
	27232	L1	LEC	TC	L2/3-IT	GSM6812158				10033	E4	MTG	TC	L2-IT	GSM5163245				2781	B2	cortex	FC	L2/3-IT	GSM6406042
	27147	L1	LEC	TC	L4_6	GSM6812067				17083	I1	LEC	TC	L2-IT	GSM6787926				2782	B2	cortex	FC	L2/3-IT	GSM6406044
	26647	L1	LEC	TC	L4_6	GSM6811504				17046	I1	LEC	TC	L2-IT	GSM6787882				2783	B2	cortex	FC	L4_6	GSM6406048
	26771	L1	LEC	TC	L2/3-IT	GSM6811644				17117	I1	LEC	TC	L2-IT	GSM6787965				2784	B2	cortex	FC	L4_6	GSM6406050
	25598	L1	LEC	TC	L4_6	GSM6810319				16081	I1	LEC	TC	L2-IT	GSM6786611				2785	B2	cortex	FC	L2/3-IT	GSM6406051
	27218	L1	LEC	TC	L2/3-IT	GSM6812142				16119	I1	LEC	TC	L2-IT	GSM6786659				2787	B2	cortex	FC	L2/3-IT	GSM6406054
	26459	L1	LEC	TC	L2/3-IT	GSM6811301				16403	I1	LEC	TC	L2-IT	GSM6787063				2788	B2	cortex	FC	L2/3-IT	GSM6406057
	27159	L1	LEC	TC	L2/3-IT	GSM6812081				9917	E4	MTG	TC	L4	GSM5162387				2789	B2	cortex	FC	L2/3-IT	GSM6406059
	26430	L1	LEC	TC	L4_6	GSM6811269				15849	I1	LEC	TC	L4	GSM6786304				2790	B2	cortex	FC	L2/3-IT	GSM6406060
	27006	L1	LEC	TC	L4_6	GSM6811910				9855	E4	MTG	TC	L4	GSM5161850				2791	B2	cortex	FC	L4_6	GSM6406062
	27545	L1	LEC	TC	L4_6	GSM6812524				16101	I1	LEC	TC	L2-IT	GSM6786635				2792	B2	cortex	FC	L2/3-IT	GSM6406063
	26573	L1	LEC	TC	L2/3-IT	GSM6811422				16752	I1	LEC	TC	L2-IT	GSM6787522				2794	B2	cortex	FC	L4_6	GSM6406066
	26792	L1	LEC	TC	L4_6	GSM6811670				16263	I1	LEC	TC	L4	GSM6786851				2795	B2	cortex	FC	L4_6	GSM6406067
	27184	L1	LEC	TC	L4_6	GSM6812107				16536	I1	LEC	TC	L2-IT	GSM6787247				2796	B2	cortex	FC	L4_6	GSM6406068
	8884	D3	A46	FC	L4_6	GSM6791870				16063	I1	LEC	TC	L2-IT	GSM6786593				2797	B2	cortex	FC	L2/3-IT	GSM6406070
	26549	L1	LEC	TC	L4_6	GSM6811396				16671	I1	LEC	TC	L2-IT	GSM6787423				2798	B2	cortex	FC	L2/3-IT	GSM6406073
	26616	L1	LEC	TC	L2/3-IT	GSM6811471				9779	E4	MTG	TC	L4	GSM5161330				2799	B2	cortex	FC	L4_6	GSM6406074
	25872	L1	LEC	TC	L4_6	GSM6810625				15833	I1	LEC	TC	L2-IT	GSM6786285				2800	B2	cortex	FC	L4_6	GSM6406075
	27253	L1	LEC	TC	L4_6	GSM6812182				16035	I1	LEC	TC	L2-IT	GSM6786557				2802	B2	cortex	FC	L2/3-IT	GSM6406079
	16392	H3	A24	FC	L4_6	GSM6869468				17000	I1	LEC	TC	L2-IT	GSM6787832				2803	B2	cortex	FC	L2/3-IT	GSM6406080
	23140	K1	FI	FC	L4_6	GSM6837623				16935	I1	LEC	TC	L2-IT	GSM6787754				2804	B2	cortex	FC	L4_6	GSM6406081
	26556	L1	LEC	TC	L4_6	GSM6811404				16694	I1	LEC	TC	L4	GSM6787448				2807	B2	cortex	FC	L4_6	GSM6406098
	26540	L1	LEC	TC	L2/3-IT	GSM6811387				9820	E4	MTG	TC	L4	GSM5161663				2810	B2	cortex	FC	L2/3-IT	GSM6406106
	26673	L1	LEC	TC	L2/3-IT	GSM6811535				15133	I1	LEC	TC	L4	GSM6785075				2811	B2	cortex	FC	L2/3-IT	GSM6406107
	8785	D3	A46	FC	L4_6	GSM6790029				16052	I1	LEC	TC	L2-IT	GSM6786579				2815	B2	cortex	FC	L2/3-IT	GSM6406119
	26326	L1	LEC	TC	L4_6	GSM6811157				9983	E4	MTG	TC	L2-IT	GSM5162874				2816	B2	cortex	FC	L2/3-IT	GSM6406122
	24121	K1	FI	FC	L2/3-IT	GSM6838689				9625	E4	MTG	TC	L4	GSM5160492				2817	B2	cortex	FC	L4_6	GSM6406123
	26993	L1	LEC	TC	L2/3-IT	GSM6811897				16315	I1	LEC	TC	L4	GSM6786920				2819	B2	cortex	FC	L4_6	GSM6406134
	27574	L1	LEC	TC	L4_6	GSM6812553				16027	I1	LEC	TC	L2-IT	GSM6786545				2821	B2	cortex	FC	L4_6	GSM6406142
	26436	L1	LEC	TC	L2/3-IT	GSM6811276				9722	E4	MTG	TC	L4	GSM5161128				3146	B3	HIP	HIP	CA	GSM6525375
	16361	H3	A24	FC	L4_6	GSM6869327				15613	I1	LEC	TC	L2-IT	GSM6785972				3210	B3	HIP	HIP	DG	GSM6525583
	26356	L1	LEC	TC	L2/3-IT	GSM6811190				16686	I1	LEC	TC	L2-IT	GSM6787439				3223	B3	HIP	HIP	DG	GSM6525627
	14991	H1	Pro	OC	L4_6	GSM5443028				16333	I1	LEC	TC	L4	GSM6786939				3306	B3	HIP	HIP	CA	GSM6525954
	26359	L1	LEC	TC	L2/3-IT	GSM6811194				15739	I1	LEC	TC	L2-IT	GSM6786173				3308	B3	HIP	HIP	CA	GSM6525958
	20839	J1	V1C	OC	L4_6	GSM6740704				16937	I1	LEC	TC	L2-IT	GSM6787756				3373	B3	HIP	HIP	DG	GSM6526331
	26611	L1	LEC	TC	L4_6	GSM6811465				16494	I1	LEC	TC	L4	GSM6787198				3454	B3	HIP	HIP	CA	GSM6526791
	27240	L1	LEC	TC	L2/3-IT	GSM6812168				15850	I1	LEC	TC	L4	GSM6786305				4106	C1	HIP	HIP	DG	GSM6561199
	24214	K1	FI	FC	L2/3-IT	GSM6838787				9618	E4	MTG	TC	L4	GSM5160463				4113	C1	HIP	HIP	DG	GSM6561217
	26784	L1	LEC	TC	L2/3-IT	GSM6811659				15924	I1	LEC	TC	L2-IT	GSM6786412				4136	C1	HIP	HIP	DG	GSM6561356
	26782	L1	LEC	TC	L4_6	GSM6811656				16508	I1	LEC	TC	L4	GSM6787217				4148	C1	HIP	HIP	CA	GSM6561465
	26982	L1	LEC	TC	L2/3-IT	GSM6811886				9612	E4	MTG	TC	L4	GSM5160447				4174	C1	HIP	HIP	DG	GSM6561720
	26373	L1	LEC	TC	L2/3-IT	GSM6811209				16502	I1	LEC	TC	L2-IT	GSM6787210				4192	C1	HIP	HIP	CA	GSM6561771
	26296	L1	LEC	TC	L4_6	GSM6811121				16963	I1	LEC	TC	L2-IT	GSM6787791				4243	C1	HIP	HIP	DG	GSM6562561
	26509	L1	LEC	TC	L4_6	GSM6811355				17018	I1	LEC	TC	L4	GSM6787852				4255	C1	HIP	HIP	DG	GSM6562759
	27626	L1	LEC	TC	L4_6	GSM6812612				16543	I1	LEC	TC	L2-IT	GSM6787254				4256	C1	HIP	HIP	DG	GSM6562761
	26553	L1	LEC	TC	L2/3-IT	GSM6811401				16906	I1	LEC	TC	L2-IT	GSM6787723				4308	C1	HIP	HIP	DG	GSM6563180
	1562	A3	CA1C	HIP	L4_6	GSM6158404				17010	I1	LEC	TC	L2-IT	GSM6787844				4324	C1	HIP	HIP	CA	GSM6563240
	21988	J1	V1C	OC	L4_6	GSM6742033				9772	E4	MTG	TC	L4	GSM5161318				4332	C1	HIP	HIP	DG	GSM6563276
	24234	K1	FI	FC	L2/3-IT	GSM6838807				16142	I1	LEC	TC	L4	GSM6786686				4857	C3	cortex	OC	L4_6	GSM6841807
	25971	L1	LEC	TC	L2/3-IT	GSM6810742				9614	E4	MTG	TC	L2-IT	GSM5160452				4858	C3	cortex	OC	L2/3-IT	GSM6841821
	8509	D3	A46	FC	L2/3-IT	GSM6790065				10031	E4	MTG	TC	L2-IT	GSM5163240				4859	C3	cortex	OC	L2/3-IT	GSM6841828
	27093	L1	LEC	TC	L4_6	GSM6812005				16054	I1	LEC	TC	L4	GSM6786581				4860	C3	cortex	OC	L2/3-IT	GSM6841832
	26584	L1	LEC	TC	L2/3-IT	GSM6811433				9686	E4	MTG	TC	L2-IT	GSM5160930				4861	C3	cortex	OC	L2/3-IT	GSM6841835
	26807	L1	LEC	TC	L2/3-IT	GSM6811688				9906	E4	MTG	TC	L4	GSM5162294				4862	C3	cortex	OC	L2/3-IT	GSM6841840
	25222	K1	FI	FC	L2/3-IT	GSM6839872				15857	I1	LEC	TC	L2-IT	GSM6786312				4863	C3	cortex	OC	L4_6	GSM6841842
	27291	L1	LEC	TC	L4_6	GSM6812225				15963	I1	LEC	TC	L2-IT	GSM6786456				4864	C3	cortex	OC	L2/3-IT	GSM6841845
	24096	K1	FI	FC	L2/3-IT	GSM6838663				17064	I1	LEC	TC	L2-IT	GSM6787902				4865	C3	cortex	OC	L4_6	GSM6841847
	16336	H3	A24	FC	L2/3-IT	GSM6869252				9723	E4	MTG	TC	L4	GSM5161133				4866	C3	cortex	OC	L2/3-IT	GSM6841849
	27028	L1	LEC	TC	L2/3-IT	GSM6811933				16146	I1	LEC	TC	L4	GSM6786690				4867	C3	cortex	OC	L2/3-IT	GSM6841850
	26895	L1	LEC	TC	L2/3-IT	GSM6811784				9632	E4	MTG	TC	L4	GSM5160509				4868	C3	cortex	OC	L2/3-IT	GSM6841854
	27148	L1	LEC	TC	L2/3-IT	GSM6812068				16523	I1	LEC	TC	L4	GSM6787233				4869	C3	cortex	OC	L4_6	GSM6841855
	26422	L1	LEC	TC	L2/3-IT	GSM6811261				16058	I1	LEC	TC	L2-IT	GSM6786587				4870	C3	cortex	OC	L2/3-IT	GSM6841858
	26785	L1	LEC	TC	L2/3-IT	GSM6811661				15123	I1	LEC	TC	L4	GSM6785065				4871	C3	cortex	OC	L2/3-IT	GSM6841864
	26594	L1	LEC	TC	L4_6	GSM6811444				9756	E4	MTG	TC	L2-IT	GSM5161267				4872	C3	cortex	OC	L2/3-IT	GSM6841870
	25918	L1	LEC	TC	L4_6	GSM6810681				16992	I1	LEC	TC	L4	GSM6787822				4873	C3	cortex	OC	L4_6	GSM6841871
	16366	H3	A24	FC	L4_6	GSM6869336				16155	I1	LEC	TC	L2-IT	GSM6786701				4874	C3	cortex	OC	L2/3-IT	GSM6841875
	26497	L1	LEC	TC	L4_6	GSM6811342				9923	E4	MTG	TC	L2-IT	GSM5162425				4875	C3	cortex	OC	L4_6	GSM6841878
	26854	L1	LEC	TC	L4_6	GSM6811739				10000	E4	MTG	TC	L4	GSM5163148				4876	C3	cortex	OC	L2/3-IT	GSM6841879
	26431	L1	LEC	TC	L2/3-IT	GSM6811270				16893	I1	LEC	TC	L2-IT	GSM6787710				4877	C3	cortex	OC	L4_6	GSM6841882
	26507	L1	LEC	TC	L4_6	GSM6811353				16026	I1	LEC	TC	L2-IT	GSM6786543				4878	C3	cortex	OC	L4_6	GSM6841896
	8483	D3	A46	FC	L2/3-IT	GSM6789977				9629	E4	MTG	TC	L4	GSM5160503				4879	C3	cortex	OC	L2/3-IT	GSM6841897
	25591	L1	LEC	TC	L4_6	GSM6810312				15856	I1	LEC	TC	L2-IT	GSM6786311				4880	C3	cortex	OC	L2/3-IT	GSM6841898
	26925	L1	LEC	TC	L4_6	GSM6811819				16138	I1	LEC	TC	L4	GSM6786679				4881	C3	cortex	OC	L2/3-IT	GSM6841899
	26679	L1	LEC	TC	L2/3-IT	GSM6811541				9816	E4	MTG	TC	L2-IT	GSM5161651				4882	C3	cortex	OC	L4_6	GSM6841900
	26781	L1	LEC	TC	L2/3-IT	GSM6811654				10015	E4	MTG	TC	L2-IT	GSM5163194				4883	C3	cortex	OC	L2/3-IT	GSM6841903
	25829	L1	LEC	TC	L2/3-IT	GSM6810572				16948	I1	LEC	TC	L2-IT	GSM6787773				4884	C3	cortex	OC	L4_6	GSM6841904
	23243	K1	FI	FC	L2/3-IT	GSM6837737				16944	I1	LEC	TC	L4	GSM6787769				4885	C3	cortex	OC	L2/3-IT	GSM6841906
	26467	L1	LEC	TC	L2/3-IT	GSM6811309				15151	I1	LEC	TC	L2-IT	GSM6785095				4886	C3	cortex	OC	L2/3-IT	GSM6841907
	16358	H3	A24	FC	L4_6	GSM6869313				16538	I1	LEC	TC	L2-IT	GSM6787249				4887	C3	cortex	OC	L2/3-IT	GSM6841909
	26762	L1	LEC	TC	L4_6	GSM6811635				9934	E4	MTG	TC	L4	GSM5162459				4888	C3	cortex	OC	L4_6	GSM6841910
	26795	L1	LEC	TC	L2/3-IT	GSM6811673				9727	E4	MTG	TC	L2-IT	GSM5161145				4889	C3	cortex	OC	L4_6	GSM6841914
	26806	L1	LEC	TC	L2/3-IT	GSM6811687				15844	I1	LEC	TC	L2-IT	GSM6786298				4890	C3	cortex	OC	L2/3-IT	GSM6841922
	8829	D3	A46	FC	L4_6	GSM6789993				16788	I1	LEC	TC	L2-IT	GSM6787565				4891	C3	cortex	OC	L2/3-IT	GSM6841924
	26421	L1	LEC	TC	L4_6	GSM6811259				9657	E4	MTG	TC	L2-IT	GSM5160696				4892	C3	cortex	OC	L2/3-IT	GSM6841926
	26438	L1	LEC	TC	L4_6	GSM6811278				16190	I1	LEC	TC	L2-IT	GSM6786750				4893	C3	cortex	OC	L4_6	GSM6841932
	26512	L1	LEC	TC	L4_6	GSM6811358				16388	I1	LEC	TC	L4	GSM6787007				4894	C3	cortex	OC	L4_6	GSM6841934
	26543	L1	LEC	TC	L4_6	GSM6811390				16148	I1	LEC	TC	L4	GSM6786693				4895	C3	cortex	OC	L2/3-IT	GSM6841935
	27242	L1	LEC	TC	L2/3-IT	GSM6812170				16117	I1	LEC	TC	L2-IT	GSM6786655				4896	C3	cortex	OC	L4_6	GSM6841949
	24015	K1	FI	FC	L2/3-IT	GSM6838579				16715	I1	LEC	TC	L2-IT	GSM6787473				4897	C3	cortex	OC	L2/3-IT	GSM6841955
	27597	L1	LEC	TC	L4_6	GSM6812579				15995	I1	LEC	TC	L4	GSM6786493				4898	C3	cortex	OC	L4_6	GSM6841958
	25925	L1	LEC	TC	L2/3-IT	GSM6810689				17037	I1	LEC	TC	L4	GSM6787873				4899	C3	cortex	OC	L4_6	GSM6841968
	26239	L1	LEC	TC	L4_6	GSM6811052				9764	E4	MTG	TC	L2-IT	GSM5161289				4900	C3	cortex	OC	L2/3-IT	GSM6841969
	26902	L1	LEC	TC	L4_6	GSM6811791				16661	I1	LEC	TC	L2-IT	GSM6787413				4901	C3	cortex	OC	L2/3-IT	GSM6841973
	27175	L1	LEC	TC	L2/3-IT	GSM6812097				17005	I1	LEC	TC	L2-IT	GSM6787837				4902	C3	cortex	OC	L2/3-IT	GSM6841981
	25979	L1	LEC	TC	L4_6	GSM6810750				9648	E4	MTG	TC	L4	GSM5160567				4903	C3	cortex	OC	L4_6	GSM6841984
	10593	E2	FI	FC	L2/3-IT	GSM7213495				16673	I1	LEC	TC	L4	GSM6787426				4904	C3	cortex	OC	L2/3-IT	GSM6841985
	25847	L1	LEC	TC	L2/3-IT	GSM6810595				16546	I1	LEC	TC	L4	GSM6787257				4905	C3	cortex	OC	L4_6	GSM6841988
	26797	L1	LEC	TC	L2/3-IT	GSM6811676				9831	E4	MTG	TC	L2-IT	GSM5161703				4906	C3	cortex	OC	L2/3-IT	GSM6841993
	26899	L1	LEC	TC	L2/3-IT	GSM6811788				16964	I1	LEC	TC	L2-IT	GSM6787792				4907	C3	cortex	OC	L4_6	GSM6841995
	27299	L1	LEC	TC	L4_6	GSM6812236				16960	I1	LEC	TC	L4	GSM6787788				4908	C3	cortex	OC	L2/3-IT	GSM6842001
	27577	L1	LEC	TC	L2/3-IT	GSM6812556				16732	I1	LEC	TC	L4	GSM6787496				4909	C3	cortex	OC	L4_6	GSM6842006
	2489	B1	CA1C	HIP	L4_6	GSM5887679				9944	E4	MTG	TC	L2-IT	GSM5162487				4910	C3	cortex	OC	L4_6	GSM6842011
	24182	K1	FI	FC	L4_6	GSM6838754				16071	I1	LEC	TC	L2-IT	GSM6786601				4911	C3	cortex	OC	L2/3-IT	GSM6842013
	25912	L1	LEC	TC	L2/3-IT	GSM6810675				9780	E4	MTG	TC	L2-IT	GSM5161331				4912	C3	cortex	OC	L2/3-IT	GSM6842016
	26253	L1	LEC	TC	L2/3-IT	GSM6811069				16985	I1	LEC	TC	L2-IT	GSM6787814				4913	C3	cortex	OC	L4_6	GSM6842019
	25800	L1	LEC	TC	L2/3-IT	GSM6810542				16170	I1	LEC	TC	L2-IT	GSM6786724				4914	C3	cortex	OC	L4_6	GSM6842021
	27179	L1	LEC	TC	L2/3-IT	GSM6812101				17105	I1	LEC	TC	L2-IT	GSM6787951				4915	C3	cortex	OC	L2/3-IT	GSM6842024
	27273	L1	LEC	TC	L2/3-IT	GSM6812204				9752	E4	MTG	TC	L2-IT	GSM5161257				4916	C3	cortex	OC	L2/3-IT	GSM6842029
	26640	L1	LEC	TC	L4_6	GSM6811497				9938	E4	MTG	TC	L4	GSM5162472				4917	C3	cortex	OC	L2/3-IT	GSM6842030
	27114	L1	LEC	TC	L4_6	GSM6812029				16537	I1	LEC	TC	L4	GSM6787248				4918	C3	cortex	OC	L4_6	GSM6842031
	22894	K1	FI	FC	L4_6	GSM6837361				9689	E4	MTG	TC	L4	GSM5160936				4919	C3	cortex	OC	L2/3-IT	GSM6842037
	26524	L1	LEC	TC	L4_6	GSM6811370				16598	I1	LEC	TC	L4	GSM6787339				4920	C3	cortex	OC	L4_6	GSM6842041
	27571	L1	LEC	TC	L4_6	GSM6812550				15848	I1	LEC	TC	L4	GSM6786302				4921	C3	cortex	OC	L2/3-IT	GSM6842044
	25631	L1	LEC	TC	L2/3-IT	GSM6810354				16932	I1	LEC	TC	L2-IT	GSM6787751				4922	C3	cortex	OC	L4_6	GSM6842048
	27303	L1	LEC	TC	L2/3-IT	GSM6812240				9674	E4	MTG	TC	L2-IT	GSM5160880				4923	C3	cortex	OC	L4_6	GSM6842051
	27213	L1	LEC	TC	L4_6	GSM6812137				9884	E4	MTG	TC	L2-IT	GSM5162106				4924	C3	cortex	OC	L2/3-IT	GSM6842054
	14866	H1	Pro	OC	L4_6	GSM5442588				17097	I1	LEC	TC	L4	GSM6787942				4925	C3	cortex	OC	L2/3-IT	GSM6842058
	26983	L1	LEC	TC	L4_6	GSM6811887				9781	E4	MTG	TC	L2-IT	GSM5161334				4926	C3	cortex	OC	L2/3-IT	GSM6842064
	26367	L1	LEC	TC	L2/3-IT	GSM6811203				9980	E4	MTG	TC	L2-IT	GSM5162867				4927	C3	cortex	OC	L2/3-IT	GSM6842068
	27025	L1	LEC	TC	L2/3-IT	GSM6811929				9787	E4	MTG	TC	L2-IT	GSM5161372				4928	C3	cortex	OC	L2/3-IT	GSM6842077
	27533	L1	LEC	TC	L2/3-IT	GSM6812510				16104	I1	LEC	TC	L2-IT	GSM6786638				4929	C3	cortex	OC	L2/3-IT	GSM6842079
	27605	L1	LEC	TC	L2/3-IT	GSM6812589				16151	I1	LEC	TC	L4	GSM6786697				4930	C3	cortex	OC	L2/3-IT	GSM6842082
	27539	L1	LEC	TC	L2/3-IT	GSM6812517				15969	I1	LEC	TC	L2-IT	GSM6786463				4931	C3	cortex	OC	L4_6	GSM6842083
	25944	L1	LEC	TC	L4_6	GSM6810711				16341	I1	LEC	TC	L2-IT	GSM6786949				4932	C3	cortex	OC	L2/3-IT	GSM6842094
	26824	L1	LEC	TC	L4_6	GSM6811708				16920	I1	LEC	TC	L4	GSM6787739				4933	C3	cortex	OC	L2/3-IT	GSM6842095
	26981	L1	LEC	TC	L4_6	GSM6811885				16722	I1	LEC	TC	L2-IT	GSM6787481				4934	C3	cortex	OC	L4_6	GSM6842096
	26318	L1	LEC	TC	L2/3-IT	GSM6811148				22495	L2	A1C	TC	L4	GSM7294531				4935	C3	cortex	OC	L4_6	GSM6842101
	26834	L1	LEC	TC	L2/3-IT	GSM6811719				9818	E4	MTG	TC	L2-IT	GSM5161659				4936	C3	cortex	OC	L2/3-IT	GSM6842102
	26266	L1	LEC	TC	L2/3-IT	GSM6811084				9830	E4	MTG	TC	L2-IT	GSM5161702				4937	C3	cortex	OC	L2/3-IT	GSM6842105
	8819	D3	A46	FC	L4_6	GSM6789879				16544	I1	LEC	TC	L2-IT	GSM6787255				4938	C3	cortex	OC	L2/3-IT	GSM6842109
	27222	L1	LEC	TC	L2/3-IT	GSM6812146				17058	I1	LEC	TC	L2-IT	GSM6787895				4939	C3	cortex	OC	L2/3-IT	GSM6842111
	24269	K1	FI	FC	L4_6	GSM6838847				10014	E4	MTG	TC	L4	GSM5163193				4940	C3	cortex	OC	L4_6	GSM6842112
	25899	L1	LEC	TC	L4_6	GSM6810660				9940	E4	MTG	TC	L2-IT	GSM5162475				4941	C3	cortex	OC	L2/3-IT	GSM6842114
	26634	L1	LEC	TC	L4_6	GSM6811489				9847	E4	MTG	TC	L4	GSM5161772				4942	C3	cortex	OC	L2/3-IT	GSM6842116
	24077	K1	FI	FC	L4_6	GSM6838642				9924	E4	MTG	TC	L4	GSM5162426				4943	C3	cortex	OC	L2/3-IT	GSM6842120
	25909	L1	LEC	TC	L2/3-IT	GSM6810670				9665	E4	MTG	TC	L2-IT	GSM5160793				4944	C3	cortex	OC	L2/3-IT	GSM6842124
	23994	K1	FI	FC	L4_6	GSM6838556				16899	I1	LEC	TC	L2-IT	GSM6787716				4945	C3	cortex	OC	L4_6	GSM6842128
	27117	L1	LEC	TC	L4_6	GSM6812032				9597	E4	MTG	TC	L4	GSM5160187				4946	C3	cortex	OC	L2/3-IT	GSM6842131
	25807	L1	LEC	TC	L4_6	GSM6810549				16724	I1	LEC	TC	L4	GSM6787483				4947	C3	cortex	OC	L2/3-IT	GSM6842134
	16964	H4	LEC	TC	L2/3-IT	GSM7149454				9832	E4	MTG	TC	L4	GSM5161706				4948	C3	cortex	OC	L2/3-IT	GSM6842141
	27630	L1	LEC	TC	L2/3-IT	GSM6812616				9854	E4	MTG	TC	L4	GSM5161843				4949	C3	cortex	OC	L4_6	GSM6842153
	26379	L1	LEC	TC	L2/3-IT	GSM6811215				16023	I1	LEC	TC	L4	GSM6786540				4950	C3	cortex	OC	L4_6	GSM6842155
	27032	L1	LEC	TC	L4_6	GSM6811937				16283	I1	LEC	TC	L4	GSM6786879				4951	C3	cortex	OC	L2/3-IT	GSM6842156
	27016	L1	LEC	TC	L4_6	GSM6811920				9926	E4	MTG	TC	L2-IT	GSM5162431				4952	C3	cortex	OC	L2/3-IT	GSM6842160
	24708	K1	FI	FC	L2/3-IT	GSM6839318				15981	I1	LEC	TC	L2-IT	GSM6786479				4953	C3	cortex	OC	L2/3-IT	GSM6842162
	27190	L1	LEC	TC	L4_6	GSM6812113				16535	I1	LEC	TC	L2-IT	GSM6787245				4954	C3	cortex	OC	L4_6	GSM6842163
	25943	L1	LEC	TC	L4_6	GSM6810710				16659	I1	LEC	TC	L2-IT	GSM6787411				4955	C3	cortex	OC	L2/3-IT	GSM6842178
	27916	L1	LEC	TC	L2/3-IT	GSM6812943				16480	I1	LEC	TC	L4	GSM6787165				4956	C3	cortex	OC	L4_6	GSM6842190
	24021	K1	FI	FC	L4_6	GSM6838585				16617	I1	LEC	TC	L2-IT	GSM6787361				4957	C3	cortex	OC	L2/3-IT	GSM6842194
	26942	L1	LEC	TC	L2/3-IT	GSM6811838				16627	I1	LEC	TC	L2-IT	GSM6787372				4958	C3	cortex	OC	L2/3-IT	GSM6842197
	23496	K1	FI	FC	L4_6	GSM6838015				16087	I1	LEC	TC	L2-IT	GSM6786617				4959	C3	cortex	OC	L2/3-IT	GSM6842199
	27158	L1	LEC	TC	L4_6	GSM6812080				16940	I1	LEC	TC	L2-IT	GSM6787764				4960	C3	cortex	OC	L2/3-IT	GSM6842207
	24642	K1	FI	FC	L4_6	GSM6839252				16046	I1	LEC	TC	L4	GSM6786571				4961	C3	cortex	OC	L4_6	GSM6842208
	26883	L1	LEC	TC	L4_6	GSM6811772				16840	I1	LEC	TC	L4	GSM6787637				4962	C3	cortex	OC	L4_6	GSM6842209
	24027	K1	FI	FC	L2/3-IT	GSM6838591				16057	I1	LEC	TC	L2-IT	GSM6786586				4963	C3	cortex	OC	L2/3-IT	GSM6842230
	27588	L1	LEC	TC	L2/3-IT	GSM6812569				16909	I1	LEC	TC	L2-IT	GSM6787726				4964	C3	cortex	OC	L2/3-IT	GSM6842231
	26271	L1	LEC	TC	L2/3-IT	GSM6811091				17014	I1	LEC	TC	L2-IT	GSM6787848				4965	C3	cortex	OC	L2/3-IT	GSM6842233
	25403	L1	LEC	TC	L4_6	GSM6810106				15852	I1	LEC	TC	L2-IT	GSM6786307				4966	C3	cortex	OC	L2/3-IT	GSM6842247
	25900	L1	LEC	TC	L4_6	GSM6810661				17048	I1	LEC	TC	L2-IT	GSM6787885				4967	C3	cortex	OC	L2/3-IT	GSM6842251
	27274	L1	LEC	TC	L4_6	GSM6812206				16125	I1	LEC	TC	L2-IT	GSM6786666				4968	C3	cortex	OC	L4_6	GSM6842283
	25794	L1	LEC	TC	L2/3-IT	GSM6810536				16679	I1	LEC	TC	L4	GSM6787432				4969	C3	cortex	OC	L4_6	GSM6842296
	25914	L1	LEC	TC	L2/3-IT	GSM6810677				10016	E4	MTG	TC	L4	GSM5163198				4970	C3	cortex	OC	L2/3-IT	GSM6842300
	16344	H3	A24	FC	L2/3-IT	GSM6869271				9893	E4	MTG	TC	L2-IT	GSM5162166				4971	C3	cortex	OC	L4_6	GSM6842304
	26440	L1	LEC	TC	L2/3-IT	GSM6811281				15904	I1	LEC	TC	L2-IT	GSM6786386				4972	C3	cortex	OC	L4_6	GSM6842305
	23291	K1	FI	FC	L4_6	GSM6837790				9799	E4	MTG	TC	L4	GSM5161467				4973	C3	cortex	OC	L2/3-IT	GSM6842308
	26635	L1	LEC	TC	L4_6	GSM6811490				16336	I1	LEC	TC	L2-IT	GSM6786944				4974	C3	cortex	OC	L2/3-IT	GSM6842309
	24179	K1	FI	FC	L2/3-IT	GSM6838751				9903	E4	MTG	TC	L4	GSM5162289				4975	C3	cortex	OC	L2/3-IT	GSM6842313
	27327	L1	LEC	TC	L2/3-IT	GSM6812266				16070	I1	LEC	TC	L4	GSM6786600				4976	C3	cortex	OC	L2/3-IT	GSM6842329
	16971	H4	LEC	TC	L4_6	GSM7149462				17098	I1	LEC	TC	L2-IT	GSM6787943				4977	C3	cortex	OC	L2/3-IT	GSM6842330
	27002	L1	LEC	TC	L4_6	GSM6811906				15822	I1	LEC	TC	L4	GSM6786272				4978	C3	cortex	OC	L2/3-IT	GSM6842346
	23271	K1	FI	FC	L2/3-IT	GSM6837766				15997	I1	LEC	TC	L2-IT	GSM6786496				4979	C3	cortex	OC	L2/3-IT	GSM6842359
	25998	L1	LEC	TC	L2/3-IT	GSM6810770				15933	I1	LEC	TC	L4	GSM6786424				4980	C3	cortex	OC	L2/3-IT	GSM6842362
	8869	D3	A46	FC	L4_6	GSM6789102				9921	E4	MTG	TC	L2-IT	GSM5162418				4981	C3	cortex	OC	L2/3-IT	GSM6842377
	8890	D3	A46	FC	L4_6	GSM6790703				9684	E4	MTG	TC	L2-IT	GSM5160927				4982	C3	cortex	OC	L4_6	GSM6842396
	12732	F2	V1C	OC	L4_6	GSM7190181				16261	I1	LEC	TC	L2-IT	GSM6786848				4983	C3	cortex	OC	L2/3-IT	GSM6842400
	26610	L1	LEC	TC	L4_6	GSM6811464				9959	E4	MTG	TC	L4	GSM5162681				4984	C3	cortex	OC	L2/3-IT	GSM6842403
	24646	K1	FI	FC	L2/3-IT	GSM6839256				9671	E4	MTG	TC	L2-IT	GSM5160837				4985	C3	cortex	OC	L2/3-IT	GSM6842417
	26960	L1	LEC	TC	L4_6	GSM6811858				15958	I1	LEC	TC	L2-IT	GSM6786451				4986	C3	cortex	OC	L4_6	GSM6842427
	25969	L1	LEC	TC	L2/3-IT	GSM6810739				9841	E4	MTG	TC	L4	GSM5161736				4987	C3	cortex	OC	L2/3-IT	GSM6842428
	24138	K1	FI	FC	L4_6	GSM6838707				9604	E4	MTG	TC	L4	GSM5160227				4988	C3	cortex	OC	L4_6	GSM6842432
	25839	L1	LEC	TC	L4_6	GSM6810585				16050	I1	LEC	TC	L2-IT	GSM6786577				4989	C3	cortex	OC	L2/3-IT	GSM6842433
	26790	L1	LEC	TC	L4_6	GSM6811668				16112	I1	LEC	TC	L2-IT	GSM6786650				4990	C3	cortex	OC	L2/3-IT	GSM6842434
	19955	J1	V1C	OC	L2/3-IT	GSM6739711				16908	I1	LEC	TC	L2-IT	GSM6787725				4991	C3	cortex	OC	L2/3-IT	GSM6842435
	25803	L1	LEC	TC	L2/3-IT	GSM6810545				17049	I1	LEC	TC	L2-IT	GSM6787886				4992	C3	cortex	OC	L4_6	GSM6842436
	25960	L1	LEC	TC	L2/3-IT	GSM6810729				9620	E4	MTG	TC	L4	GSM5160480				4993	C3	cortex	OC	L2/3-IT	GSM6842437
	27120	L1	LEC	TC	L2/3-IT	GSM6812036				9824	E4	MTG	TC	L4	GSM5161674				4994	C3	cortex	OC	L4_6	GSM6842441
	27196	L1	LEC	TC	L4_6	GSM6812120				15614	I1	LEC	TC	L2-IT	GSM6785973				4995	C3	cortex	OC	L4_6	GSM6842442
	27570	L1	LEC	TC	L2/3-IT	GSM6812549				9595	E4	MTG	TC	L4	GSM5160167				4996	C3	cortex	OC	L2/3-IT	GSM6842444
	23228	K1	FI	FC	L4_6	GSM6837719				9694	E4	MTG	TC	L4	GSM5160946				4997	C3	cortex	OC	L2/3-IT	GSM6842448
	24692	K1	FI	FC	L2/3-IT	GSM6839302				9733	E4	MTG	TC	L4	GSM5161191				4998	C3	cortex	OC	L2/3-IT	GSM6842449
	26686	L1	LEC	TC	L2/3-IT	GSM6811548				16911	I1	LEC	TC	L2-IT	GSM6787730				4999	C3	cortex	OC	L4_6	GSM6842451
	26292	L1	LEC	TC	L4_6	GSM6811117				15738	I1	LEC	TC	L2-IT	GSM6786172				5000	C3	cortex	OC	L2/3-IT	GSM6842454
	23283	K1	FI	FC	L2/3-IT	GSM6837779				15923	I1	LEC	TC	L4	GSM6786409				5001	C3	cortex	OC	L2/3-IT	GSM6842460
	25465	L1	LEC	TC	L2/3-IT	GSM6810175				16323	I1	LEC	TC	L2-IT	GSM6786929				5002	C3	cortex	OC	L2/3-IT	GSM6842464
	26917	L1	LEC	TC	L2/3-IT	GSM6811810				16624	I1	LEC	TC	L2-IT	GSM6787368				5003	C3	cortex	OC	L2/3-IT	GSM6842468
	25629	L1	LEC	TC	L2/3-IT	GSM6810352				16320	I1	LEC	TC	L4	GSM6786925				5004	C3	cortex	OC	L2/3-IT	GSM6842472
	26768	L1	LEC	TC	L2/3-IT	GSM6811641				16419	I1	LEC	TC	L2-IT	GSM6787082				5005	C3	cortex	OC	L4_6	GSM6842474
	26487	L1	LEC	TC	L2/3-IT	GSM6811332				10007	E4	MTG	TC	L2-IT	GSM5163170				5006	C3	cortex	OC	L2/3-IT	GSM6842475
	25877	L1	LEC	TC	L4_6	GSM6810631				16768	I1	LEC	TC	L2-IT	GSM6787540				5007	C3	cortex	OC	L2/3-IT	GSM6842479
	23830	K1	FI	FC	L4_6	GSM6838382				15631	I1	LEC	TC	L4	GSM6785998				5008	C3	cortex	OC	L2/3-IT	GSM6842481
	25070	K1	FI	FC	L2/3-IT	GSM6839709				16783	I1	LEC	TC	L2-IT	GSM6787559				5009	C3	cortex	OC	L2/3-IT	GSM6842488
	27022	L1	LEC	TC	L4_6	GSM6811926				9673	E4	MTG	TC	L4	GSM5160868				5010	C3	cortex	OC	L2/3-IT	GSM6842490
	26838	L1	LEC	TC	L2/3-IT	GSM6811723				16306	I1	LEC	TC	L2-IT	GSM6786909				5011	C3	cortex	OC	L4_6	GSM6842492
	27152	L1	LEC	TC	L2/3-IT	GSM6812073				16287	I1	LEC	TC	L4	GSM6786883				5012	C3	cortex	OC	L2/3-IT	GSM6842496
	27619	L1	LEC	TC	L4_6	GSM6812605				9927	E4	MTG	TC	L4	GSM5162435				5013	C3	cortex	OC	L2/3-IT	GSM6842500
	4508	C1	A5-A7	PC	L2/3-IT	GSM5408262				22114	L2	A1C	TC	L4	GSM7292946				5014	C3	cortex	OC	L2/3-IT	GSM6842501
	16338	H3	A24	FC	L4_6	GSM6869260				9773	E4	MTG	TC	L2-IT	GSM5161320				5015	C3	cortex	OC	L2/3-IT	GSM6842504
	26499	L1	LEC	TC	L4_6	GSM6811344				17032	I1	LEC	TC	L2-IT	GSM6787868				5016	C3	cortex	OC	L2/3-IT	GSM6842510
	16960	H4	LEC	TC	L2/3-IT	GSM7149450				22376	L2	A1C	TC	L2-IT	GSM7294205				5017	C3	cortex	OC	L2/3-IT	GSM6842511
	24653	K1	FI	FC	L4_6	GSM6839263				9828	E4	MTG	TC	L4	GSM5161689				5018	C3	cortex	OC	L4_6	GSM6842516
	22925	K1	FI	FC	L2/3-IT	GSM6837396				16923	I1	LEC	TC	L4	GSM6787742				5019	C3	cortex	OC	L2/3-IT	GSM6842521
	27624	L1	LEC	TC	L2/3-IT	GSM6812610				16696	I1	LEC	TC	L4	GSM6787451				5020	C3	cortex	OC	L2/3-IT	GSM6842524
	12471	F2	V1C	OC	L2/3-IT	GSM7189287				15625	I1	LEC	TC	L2-IT	GSM6785989				5021	C3	cortex	OC	L4_6	GSM6842526
	27333	L1	LEC	TC	L2/3-IT	GSM6812273				16243	I1	LEC	TC	L2-IT	GSM6786824				5022	C3	cortex	OC	L2/3-IT	GSM6842529
	25749	L1	LEC	TC	L2/3-IT	GSM6810485				17108	I1	LEC	TC	L2-IT	GSM6787956				5023	C3	cortex	OC	L2/3-IT	GSM6842530
	26219	L1	LEC	TC	L2/3-IT	GSM6811028				16075	I1	LEC	TC	L4	GSM6786605				5024	C3	cortex	OC	L4_6	GSM6842533
	25785	L1	LEC	TC	L4_6	GSM6810526				9742	E4	MTG	TC	L2-IT	GSM5161230				5025	C3	cortex	OC	L2/3-IT	GSM6842539
	27081	L1	LEC	TC	L2/3-IT	GSM6811992				15118	I1	LEC	TC	L2-IT	GSM6785059				5026	C3	cortex	OC	L2/3-IT	GSM6842544
	8773	D3	A46	FC	L4_6	GSM6789237				16446	I1	LEC	TC	L2-IT	GSM6787118				5027	C3	cortex	OC	L4_6	GSM6842569
	26233	L1	LEC	TC	L4_6	GSM6811046				16622	I1	LEC	TC	L2-IT	GSM6787366				5028	C3	cortex	OC	L2/3-IT	GSM6842581
	27027	L1	LEC	TC	L4_6	GSM6811931				9945	E4	MTG	TC	L4	GSM5162489				5029	C3	cortex	OC	L4_6	GSM6842601
	26448	L1	LEC	TC	L2/3-IT	GSM6811289				9979	E4	MTG	TC	L4	GSM5162865				5030	C3	cortex	OC	L2/3-IT	GSM6842620
	26900	L1	LEC	TC	L2/3-IT	GSM6811789				16596	I1	LEC	TC	L4	GSM6787336				5031	C3	cortex	OC	L4_6	GSM6842624
	24111	K1	FI	FC	L4_6	GSM6838679				16156	I1	LEC	TC	L2-IT	GSM6786702				5032	C3	cortex	OC	L2/3-IT	GSM6842625
	24901	K1	FI	FC	L2/3-IT	GSM6839526				9791	E4	MTG	TC	L4	GSM5161420				5033	C3	cortex	OC	L2/3-IT	GSM6842631
	26674	L1	LEC	TC	L2/3-IT	GSM6811536				9763	E4	MTG	TC	L2-IT	GSM5161285				5034	C3	cortex	OC	L2/3-IT	GSM6842632
	26346	L1	LEC	TC	L4_6	GSM6811178				9716	E4	MTG	TC	L4	GSM5161072				5035	C3	cortex	OC	L4_6	GSM6842634
	8746	D3	A46	FC	L4_6	GSM6789229				9922	E4	MTG	TC	L2-IT	GSM5162419				5036	C3	cortex	OC	L4_6	GSM6842637
	26397	L1	LEC	TC	L4_6	GSM6811233				9984	E4	MTG	TC	L2-IT	GSM5162942				5037	C3	cortex	OC	L2/3-IT	GSM6842649
	26482	L1	LEC	TC	L2/3-IT	GSM6811327				15843	I1	LEC	TC	L2-IT	GSM6786296				5038	C3	cortex	OC	L2/3-IT	GSM6842656
	24894	K1	FI	FC	L4_6	GSM6839515				9746	E4	MTG	TC	L4	GSM5161239				5039	C3	cortex	OC	L2/3-IT	GSM6842662
	22927	K1	FI	FC	L2/3-IT	GSM6837398				21864	L2	A1C	TC	L4	GSM7292197				5040	C3	cortex	OC	L4_6	GSM6842665
	25773	L1	LEC	TC	L2/3-IT	GSM6810511				16607	I1	LEC	TC	L4	GSM6787350				5041	C3	cortex	OC	L4_6	GSM6842669
	27602	L1	LEC	TC	L2/3-IT	GSM6812584				9895	E4	MTG	TC	L2-IT	GSM5162177				5042	C3	cortex	OC	L2/3-IT	GSM6842678
	8449	D3	A46	FC	L2/3-IT	GSM6791617				9994	E4	MTG	TC	L2-IT	GSM5163130				5043	C3	cortex	OC	L4_6	GSM6842680
	24117	K1	FI	FC	L2/3-IT	GSM6838685				9645	E4	MTG	TC	L4	GSM5160562				5044	C3	cortex	OC	L4_6	GSM6842682
	27576	L1	LEC	TC	L2/3-IT	GSM6812555				15818	I1	LEC	TC	L2-IT	GSM6786268				5045	C3	cortex	OC	L4_6	GSM6842684
	16620	H3	A24	FC	L2/3-IT	GSM6870417				9748	E4	MTG	TC	L4	GSM5161241				5046	C3	cortex	OC	L2/3-IT	GSM6842686
	25660	L1	LEC	TC	L2/3-IT	GSM6810385				15745	I1	LEC	TC	L4	GSM6786181				5047	C3	cortex	OC	L4_6	GSM6842688
	26450	L1	LEC	TC	L2/3-IT	GSM6811292				16149	I1	LEC	TC	L4	GSM6786695				5048	C3	cortex	OC	L2/3-IT	GSM6842690
	24041	K1	FI	FC	L4_6	GSM6838606				9867	E4	MTG	TC	L2-IT	GSM5161911				5049	C3	cortex	OC	L2/3-IT	GSM6842694
	27180	L1	LEC	TC	L4_6	GSM6812102				16069	I1	LEC	TC	L2-IT	GSM6786599				5050	C3	cortex	OC	L2/3-IT	GSM6842697
	24854	K1	FI	FC	L4_6	GSM6839470				9930	E4	MTG	TC	L4	GSM5162441				5051	C3	cortex	OC	L2/3-IT	GSM6842698
	25867	L1	LEC	TC	L4_6	GSM6810620				9698	E4	MTG	TC	L4	GSM5160961				5052	C3	cortex	OC	L2/3-IT	GSM6842699
	20464	J1	V1C	OC	L2/3-IT	GSM6740291				9691	E4	MTG	TC	L2-IT	GSM5160938				5053	C3	cortex	OC	L4_6	GSM6842702
	26927	L1	LEC	TC	L2/3-IT	GSM6811822				14988	I1	LEC	TC	L2-IT	GSM6784875				5054	C3	cortex	OC	L4_6	GSM6842704
	23953	K1	FI	FC	L4_6	GSM6838514				16359	I1	LEC	TC	L2-IT	GSM6786971				5055	C3	cortex	OC	L4_6	GSM6842705
	27135	L1	LEC	TC	L4_6	GSM6812053				16978	I1	LEC	TC	L2-IT	GSM6787807				5056	C3	cortex	OC	L2/3-IT	GSM6842706
	27150	L1	LEC	TC	L4_6	GSM6812071				16397	I1	LEC	TC	L2-IT	GSM6787032				5057	C3	cortex	OC	L2/3-IT	GSM6842708
	23482	K1	FI	FC	L2/3-IT	GSM6838000				9642	E4	MTG	TC	L4	GSM5160549				5058	C3	cortex	OC	L2/3-IT	GSM6842710
	10638	E2	FI	FC	L4_6	GSM7211987				16029	I1	LEC	TC	L4	GSM6786548				5059	C3	cortex	OC	L2/3-IT	GSM6842711
	24193	K1	FI	FC	L4_6	GSM6838765				9996	E4	MTG	TC	L2-IT	GSM5163134				5060	C3	cortex	OC	L2/3-IT	GSM6842712
	8513	D3	A46	FC	L2/3-IT	GSM6790447				15931	I1	LEC	TC	L2-IT	GSM6786421				5061	C3	cortex	OC	L4_6	GSM6842714
	27567	L1	LEC	TC	L2/3-IT	GSM6812546				9639	E4	MTG	TC	L4	GSM5160541				5062	C3	cortex	OC	L2/3-IT	GSM6842715
	8717	D3	A46	FC	L4_6	GSM6789968				16677	I1	LEC	TC	L4	GSM6787430				5063	C3	cortex	OC	L2/3-IT	GSM6842717
	8500	D3	A46	FC	L2/3-IT	GSM6789225				16650	I1	LEC	TC	L2-IT	GSM6787402				5064	C3	cortex	OC	L2/3-IT	GSM6842720
	8745	D3	A46	FC	L4_6	GSM6789228				9753	E4	MTG	TC	L2-IT	GSM5161258				5065	C3	cortex	OC	L2/3-IT	GSM6842723
	16977	H4	LEC	TC	L4_6	GSM7149468				16345	I1	LEC	TC	L2-IT	GSM6786954				5066	C3	cortex	OC	L4_6	GSM6842726
	26829	L1	LEC	TC	L2/3-IT	GSM6811714				16605	I1	LEC	TC	L2-IT	GSM6787347				5067	C3	cortex	OC	L2/3-IT	GSM6842728
	8747	D3	A46	FC	L4_6	GSM6789288				16118	I1	LEC	TC	L2-IT	GSM6786657				5068	C3	cortex	OC	L4_6	GSM6842729
	23986	K1	FI	FC	L4_6	GSM6838548				17051	I1	LEC	TC	L2-IT	GSM6787888				5069	C3	cortex	OC	L2/3-IT	GSM6842731
	26984	L1	LEC	TC	L4_6	GSM6811888				9827	E4	MTG	TC	L2-IT	GSM5161685				5070	C3	cortex	OC	L2/3-IT	GSM6842734
	23184	K1	FI	FC	L4_6	GSM6837670				9978	E4	MTG	TC	L2-IT	GSM5162858				5071	C3	cortex	OC	L4_6	GSM6842736
	24044	K1	FI	FC	L4_6	GSM6838609				16505	I1	LEC	TC	L2-IT	GSM6787214				5072	C3	cortex	OC	L4_6	GSM6842746
	24142	K1	FI	FC	L4_6	GSM6838711				16182	I1	LEC	TC	L4	GSM6786741				5073	C3	cortex	OC	L2/3-IT	GSM6842767
	22009	J1	V1C	OC	L4_6	GSM6742055				9675	E4	MTG	TC	L2-IT	GSM5160881				5074	C3	cortex	OC	L2/3-IT	GSM6842800
	27192	L1	LEC	TC	L4_6	GSM6812115				16798	I1	LEC	TC	L2-IT	GSM6787578				5075	C3	cortex	OC	L4_6	GSM6842801
	26955	L1	LEC	TC	L2/3-IT	GSM6811853				9960	E4	MTG	TC	L2-IT	GSM5162747				5076	C3	cortex	OC	L2/3-IT	GSM6842815
	8886	D3	A46	FC	L4_6	GSM6789988				16002	I1	LEC	TC	L2-IT	GSM6786508				5077	C3	cortex	OC	L2/3-IT	GSM6842820
	27195	L1	LEC	TC	L4_6	GSM6812119				9617	E4	MTG	TC	L4	GSM5160461				5078	C3	cortex	OC	L4_6	GSM6842823
	27056	L1	LEC	TC	L2/3-IT	GSM6811964				9784	E4	MTG	TC	L4	GSM5161348				5079	C3	cortex	OC	L2/3-IT	GSM6842841
	26845	L1	LEC	TC	L4_6	GSM6811730				9999	E4	MTG	TC	L4	GSM5163145				5080	C3	cortex	OC	L2/3-IT	GSM6842843
	26921	L1	LEC	TC	L4_6	GSM6811815				16542	I1	LEC	TC	L4	GSM6787253				5081	C3	cortex	OC	L4_6	GSM6842844
	4507	C1	A5-A7	PC	L2/3-IT	GSM5408261				9668	E4	MTG	TC	L2-IT	GSM5160820				5082	C3	cortex	OC	L4_6	GSM6842845
	27172	L1	LEC	TC	L2/3-IT	GSM6812094				16993	I1	LEC	TC	L4	GSM6787823				5083	C3	cortex	OC	L4_6	GSM6842846
	26259	L1	LEC	TC	L4_6	GSM6811075				15064	I1	LEC	TC	L2-IT	GSM6784989				5084	C3	cortex	OC	L4_6	GSM6842849
	26763	L1	LEC	TC	L4_6	GSM6811636				15149	I1	LEC	TC	L2-IT	GSM6785093				5085	C3	cortex	OC	L2/3-IT	GSM6842850
	27224	L1	LEC	TC	L4_6	GSM6812148				9968	E4	MTG	TC	L4	GSM5162800				5086	C3	cortex	OC	L4_6	GSM6842854
	27551	L1	LEC	TC	L2/3-IT	GSM6812530				9795	E4	MTG	TC	L2-IT	GSM5161442				5087	C3	cortex	OC	L2/3-IT	GSM6842862
	24055	K1	FI	FC	L4_6	GSM6838620				9862	E4	MTG	TC	L2-IT	GSM5161872				5089	C3	cortex	OC	L2/3-IT	GSM6842954
	24089	K1	FI	FC	L4_6	GSM6838656				15935	I1	LEC	TC	L2-IT	GSM6786426				5090	C3	cortex	OC	L2/3-IT	GSM6842957
	26227	L1	LEC	TC	L2/3-IT	GSM6811039				16192	I1	LEC	TC	L2-IT	GSM6786755				5091	C3	cortex	OC	L4_6	GSM6842960
	23964	K1	FI	FC	L4_6	GSM6838525				16212	I1	LEC	TC	L2-IT	GSM6786781				5092	C3	cortex	OC	L2/3-IT	GSM6842961
	26970	L1	LEC	TC	L4_6	GSM6811873				16533	I1	LEC	TC	L2-IT	GSM6787243				5093	C3	cortex	OC	L4_6	GSM6842964
	24695	K1	FI	FC	L2/3-IT	GSM6839305				16635	I1	LEC	TC	L2-IT	GSM6787382				5094	C3	cortex	OC	L4_6	GSM6842976
	24678	K1	FI	FC	L4_6	GSM6839288				16781	I1	LEC	TC	L2-IT	GSM6787557				5095	C3	cortex	OC	L4_6	GSM6842989
	25936	L1	LEC	TC	L4_6	GSM6810702				17093	I1	LEC	TC	L2-IT	GSM6787938				5096	C3	cortex	OC	L2/3-IT	GSM6842991
	26920	L1	LEC	TC	L4_6	GSM6811814				10038	E4	MTG	TC	L4	GSM5163253				5097	C3	cortex	OC	L2/3-IT	GSM6842994
	20575	J1	V1C	OC	L2/3-IT	GSM6740408				9679	E4	MTG	TC	L2-IT	GSM5160912				5098	C3	cortex	OC	L2/3-IT	GSM6842995
	22910	K1	FI	FC	L4_6	GSM6837381				16168	I1	LEC	TC	L2-IT	GSM6786719				5099	C3	cortex	OC	L4_6	GSM6842999
	25851	L1	LEC	TC	L4_6	GSM6810602				9856	E4	MTG	TC	L4	GSM5161853				5100	C3	cortex	OC	L2/3-IT	GSM6843006
	26571	L1	LEC	TC	L4_6	GSM6811420				16184	I1	LEC	TC	L4	GSM6786743				5101	C3	cortex	OC	L2/3-IT	GSM6843024
	26879	L1	LEC	TC	L4_6	GSM6811768				16312	I1	LEC	TC	L2-IT	GSM6786917				5102	C3	cortex	OC	L4_6	GSM6843029
	27030	L1	LEC	TC	L2/3-IT	GSM6811935				17023	I1	LEC	TC	L2-IT	GSM6787857				5103	C3	cortex	OC	L2/3-IT	GSM6843036
	22921	K1	FI	FC	L4_6	GSM6837392				9932	E4	MTG	TC	L4	GSM5162449				5104	C3	cortex	OC	L2/3-IT	GSM6843052
	25835	L1	LEC	TC	L4_6	GSM6810578				16328	I1	LEC	TC	L4	GSM6786934				5105	C3	cortex	OC	L4_6	GSM6843066
	27202	L1	LEC	TC	L4_6	GSM6812126				16036	I1	LEC	TC	L2-IT	GSM6786558				5106	C3	cortex	OC	L2/3-IT	GSM6843072
	27536	L1	LEC	TC	L4_6	GSM6812513				16429	I1	LEC	TC	L2-IT	GSM6787100				5107	C3	cortex	OC	L2/3-IT	GSM6843080
	21941	J1	V1C	OC	L2/3-IT	GSM6741982				17045	I1	LEC	TC	L2-IT	GSM6787881				5108	C3	cortex	OC	L2/3-IT	GSM6843082
	8543	D3	A46	FC	L2/3-IT	GSM6789280				9798	E4	MTG	TC	L4	GSM5161447				5109	C3	cortex	OC	L4_6	GSM6843084
	22893	K1	FI	FC	L2/3-IT	GSM6837360				9951	E4	MTG	TC	L4	GSM5162597				5110	C3	cortex	OC	L4_6	GSM6843086
	22014	J1	V1C	OC	L2/3-IT	GSM6742062				15742	I1	LEC	TC	L2-IT	GSM6786176				5111	C3	cortex	OC	L2/3-IT	GSM6843100
	27243	L1	LEC	TC	L2/3-IT	GSM6812171				15985	I1	LEC	TC	L2-IT	GSM6786483				5112	C3	cortex	OC	L2/3-IT	GSM6843111
	27555	L1	LEC	TC	L4_6	GSM6812534				16164	I1	LEC	TC	L2-IT	GSM6786712				5113	C3	cortex	OC	L4_6	GSM6843115
	23991	K1	FI	FC	L2/3-IT	GSM6838553				16330	I1	LEC	TC	L2-IT	GSM6786936				5114	C3	cortex	OC	L4_6	GSM6843117
	25286	K1	FI	FC	L4_6	GSM6839941				9610	E4	MTG	TC	L4	GSM5160348				5115	C3	cortex	OC	L2/3-IT	GSM6843122
	25628	L1	LEC	TC	L2/3-IT	GSM6810351				9622	E4	MTG	TC	L4	GSM5160486				5116	C3	cortex	OC	L2/3-IT	GSM6843123
	4881	C1	A5-A7	PC	L4_6	GSM5408299				9955	E4	MTG	TC	L2-IT	GSM5162609				5117	C3	cortex	OC	L2/3-IT	GSM6843125
	23132	K1	FI	FC	L4_6	GSM6837615				15479	I1	LEC	TC	L2-IT	GSM6785766				5118	C3	cortex	OC	L2/3-IT	GSM6843143
	26943	L1	LEC	TC	L2/3-IT	GSM6811839				16033	I1	LEC	TC	L2-IT	GSM6786555				5119	C3	cortex	OC	L2/3-IT	GSM6843148
	8540	D3	A46	FC	L2/3-IT	GSM6789210				15905	I1	LEC	TC	L2-IT	GSM6786387				5120	C3	cortex	OC	L4_6	GSM6843161
	23135	K1	FI	FC	L2/3-IT	GSM6837618				9962	E4	MTG	TC	L4	GSM5162764				5121	C3	cortex	OC	L2/3-IT	GSM6843166
	27163	L1	LEC	TC	L2/3-IT	GSM6812085				16288	I1	LEC	TC	L2-IT	GSM6786884				5122	C3	cortex	OC	L2/3-IT	GSM6843177
	25399	L1	LEC	TC	L2/3-IT	GSM6810102				10032	E4	MTG	TC	L4	GSM5163241				5123	C3	cortex	OC	L2/3-IT	GSM6843198
	25236	K1	FI	FC	L4_6	GSM6839887				16782	I1	LEC	TC	L4	GSM6787558				5124	C3	cortex	OC	L4_6	GSM6843202
	26841	L1	LEC	TC	L2/3-IT	GSM6811726				9701	E4	MTG	TC	L2-IT	GSM5161000				5125	C3	cortex	OC	L2/3-IT	GSM6843214
	24197	K1	FI	FC	L4_6	GSM6838770				9623	E4	MTG	TC	L4	GSM5160488				5126	C3	cortex	OC	L4_6	GSM6843220
	27245	L1	LEC	TC	L4_6	GSM6812173				9685	E4	MTG	TC	L4	GSM5160929				5127	C3	cortex	OC	L2/3-IT	GSM6843221
	26630	L1	LEC	TC	L2/3-IT	GSM6811485				16430	I1	LEC	TC	L2-IT	GSM6787101				5128	C3	cortex	OC	L4_6	GSM6843223
	24270	K1	FI	FC	L4_6	GSM6838848				16433	I1	LEC	TC	L2-IT	GSM6787105				5129	C3	cortex	OC	L2/3-IT	GSM6843225
	27165	L1	LEC	TC	L2/3-IT	GSM6812087				9858	E4	MTG	TC	L4	GSM5161860				5130	C3	cortex	OC	L2/3-IT	GSM6843230
	27340	L1	LEC	TC	L4_6	GSM6812280				22430	L2	A1C	TC	L4	GSM7294426				5131	C3	cortex	OC	L2/3-IT	GSM6843231
	26777	L1	LEC	TC	L2/3-IT	GSM6811650				15974	I1	LEC	TC	L2-IT	GSM6786469				5132	C3	cortex	OC	L2/3-IT	GSM6843235
	24768	K1	FI	FC	L4_6	GSM6839381				16603	I1	LEC	TC	L2-IT	GSM6787345				5133	C3	cortex	OC	L4_6	GSM6843241
	24223	K1	FI	FC	L4_6	GSM6838796				9598	E4	MTG	TC	L4	GSM5160198				5134	C3	cortex	OC	L4_6	GSM6843245
	25358	L1	LEC	TC	L4_6	GSM6810058				9663	E4	MTG	TC	L4	GSM5160769				5135	C3	cortex	OC	L2/3-IT	GSM6843247
	25757	L1	LEC	TC	L2/3-IT	GSM6810494				9666	E4	MTG	TC	L4	GSM5160794				5136	C3	cortex	OC	L2/3-IT	GSM6843250
	27074	L1	LEC	TC	L2/3-IT	GSM6811984				16296	I1	LEC	TC	L4	GSM6786893				5137	C3	cortex	OC	L2/3-IT	GSM6843251
	26987	L1	LEC	TC	L4_6	GSM6811891				16764	I1	LEC	TC	L2-IT	GSM6787535				5138	C3	cortex	OC	L2/3-IT	GSM6843255
	22904	K1	FI	FC	L2/3-IT	GSM6837375				17118	I1	LEC	TC	L2-IT	GSM6787966				5139	C3	cortex	OC	L2/3-IT	GSM6843256
	27656	L1	LEC	TC	L2/3-IT	GSM6812642				22372	L2	A1C	TC	L2-IT	GSM7294201				5140	C3	cortex	OC	L2/3-IT	GSM6843262
	2044	A4	A44-A45	FC	L4_6	GSM7296942				15091	I1	LEC	TC	L2-IT	GSM6785024				5141	C3	cortex	OC	L2/3-IT	GSM6843266
	16948	H4	LEC	TC	L4_6	GSM7149438				9740	E4	MTG	TC	L4	GSM5161209				5142	C3	cortex	OC	L4_6	GSM6843337
	26767	L1	LEC	TC	L4_6	GSM6811640				16045	I1	LEC	TC	L4	GSM6786570				5143	C3	cortex	OC	L2/3-IT	GSM6843368
	23975	K1	FI	FC	L4_6	GSM6838537				9699	E4	MTG	TC	L2-IT	GSM5160966				5144	C3	cortex	OC	L2/3-IT	GSM6843370
	24150	K1	FI	FC	L4_6	GSM6838720				16709	I1	LEC	TC	L2-IT	GSM6787466				5145	C3	cortex	OC	L2/3-IT	GSM6843432
	25594	L1	LEC	TC	L4_6	GSM6810315				16711	I1	LEC	TC	L2-IT	GSM6787468				5146	C3	cortex	OC	L2/3-IT	GSM6843441
	25742	L1	LEC	TC	L4_6	GSM6810478				17008	I1	LEC	TC	L2-IT	GSM6787841				5147	C3	cortex	OC	L4_6	GSM6843460
	26702	L1	LEC	TC	L4_6	GSM6811565				16308	I1	LEC	TC	L4	GSM6786913				5148	C3	cortex	OC	L2/3-IT	GSM6843481
	21976	J1	V1C	OC	L2/3-IT	GSM6742019				16015	I1	LEC	TC	L2-IT	GSM6786523				5149	C3	cortex	OC	L2/3-IT	GSM6843488
	25935	L1	LEC	TC	L2/3-IT	GSM6810701				17087	I1	LEC	TC	L2-IT	GSM6787931				5150	C3	cortex	OC	L2/3-IT	GSM6843504
	24682	K1	FI	FC	L2/3-IT	GSM6839292				15139	I1	LEC	TC	L4	GSM6785081				5151	C3	cortex	OC	L2/3-IT	GSM6843514
	27177	L1	LEC	TC	L2/3-IT	GSM6812099				9807	E4	MTG	TC	L2-IT	GSM5161560				5152	C3	cortex	OC	L4_6	GSM6843520
	27223	L1	LEC	TC	L2/3-IT	GSM6812147				9877	E4	MTG	TC	L2-IT	GSM5162073				5153	C3	cortex	OC	L2/3-IT	GSM6843526
	24869	K1	FI	FC	L2/3-IT	GSM6839485				9638	E4	MTG	TC	L4	GSM5160531				5154	C3	cortex	OC	L2/3-IT	GSM6843533
	26676	L1	LEC	TC	L2/3-IT	GSM6811538				16487	I1	LEC	TC	L4	GSM6787174				5155	C3	cortex	OC	L2/3-IT	GSM6843540
	24780	K1	FI	FC	L4_6	GSM6839393				10021	E4	MTG	TC	L2-IT	GSM5163208				5156	C3	cortex	OC	L4_6	GSM6843552
	26977	L1	LEC	TC	L4_6	GSM6811880				15668	I1	LEC	TC	L2-IT	GSM6786057				5157	C3	cortex	OC	L4_6	GSM6843554
	24654	K1	FI	FC	L2/3-IT	GSM6839264				16095	I1	LEC	TC	L2-IT	GSM6786627				5158	C3	cortex	OC	L2/3-IT	GSM6843565
	24217	K1	FI	FC	L4_6	GSM6838790				16389	I1	LEC	TC	L2-IT	GSM6787008				5159	C3	cortex	OC	L2/3-IT	GSM6843566
	24031	K1	FI	FC	L2/3-IT	GSM6838595				22059	L2	A1C	TC	L4	GSM7292593				5160	C3	cortex	OC	L2/3-IT	GSM6843575
	25754	L1	LEC	TC	L2/3-IT	GSM6810490				15911	I1	LEC	TC	L2-IT	GSM6786396				5161	C3	cortex	OC	L4_6	GSM6843576
	27544	L1	LEC	TC	L4_6	GSM6812523				16761	I1	LEC	TC	L2-IT	GSM6787532				5162	C3	cortex	OC	L2/3-IT	GSM6843578
	22914	K1	FI	FC	L4_6	GSM6837385				9602	E4	MTG	TC	L4	GSM5160214				5163	C3	cortex	OC	L4_6	GSM6843581
	24366	K1	FI	FC	L4_6	GSM6838948				16411	I1	LEC	TC	L2-IT	GSM6787074				5164	C3	cortex	OC	L2/3-IT	GSM6843583
	27541	L1	LEC	TC	L4_6	GSM6812520				9705	E4	MTG	TC	L2-IT	GSM5161014				5165	C3	cortex	OC	L4_6	GSM6843631
	8859	D3	A46	FC	L4_6	GSM6790088				9885	E4	MTG	TC	L2-IT	GSM5162107				5166	C3	cortex	OC	L2/3-IT	GSM6843649
	24886	K1	FI	FC	L4_6	GSM6839505				16668	I1	LEC	TC	L2-IT	GSM6787420				5167	C3	cortex	OC	L2/3-IT	GSM6843664
	8841	D3	A46	FC	L4_6	GSM6790038				16787	I1	LEC	TC	L2-IT	GSM6787564				5168	C3	cortex	OC	L4_6	GSM6843693
	25610	L1	LEC	TC	L4_6	GSM6810332				16919	I1	LEC	TC	L2-IT	GSM6787738				5169	C3	cortex	OC	L2/3-IT	GSM6843695
	26648	L1	LEC	TC	L4_6	GSM6811506				9741	E4	MTG	TC	L4	GSM5161226				5170	C3	cortex	OC	L2/3-IT	GSM6843700
	27108	L1	LEC	TC	L4_6	GSM6812022				9769	E4	MTG	TC	L4	GSM5161306				5171	C3	cortex	OC	L2/3-IT	GSM6843798
	8451	D3	A46	FC	L2/3-IT	GSM6791843				22256	L2	A1C	TC	L4	GSM7293461				5172	C3	cortex	OC	L2/3-IT	GSM6843799
	25854	L1	LEC	TC	L2/3-IT	GSM6810606				15816	I1	LEC	TC	L2-IT	GSM6786266				5173	C3	cortex	OC	L2/3-IT	GSM6843834
	26818	L1	LEC	TC	L4_6	GSM6811700				17047	I1	LEC	TC	L2-IT	GSM6787884				5174	C3	cortex	OC	L4_6	GSM6843840
	25638	L1	LEC	TC	L2/3-IT	GSM6810362				9738	E4	MTG	TC	L4	GSM5161205				5175	C3	cortex	OC	L2/3-IT	GSM6843847
	27019	L1	LEC	TC	L2/3-IT	GSM6811923				9789	E4	MTG	TC	L2-IT	GSM5161393				5176	C3	cortex	OC	L2/3-IT	GSM6843848
	24194	K1	FI	FC	L4_6	GSM6838766				15068	I1	LEC	TC	L2-IT	GSM6784994				5177	C3	cortex	OC	L4_6	GSM6843850
	25857	L1	LEC	TC	L4_6	GSM6810609				16653	I1	LEC	TC	L2-IT	GSM6787405				5178	C3	cortex	OC	L4_6	GSM6843853
	26236	L1	LEC	TC	L4_6	GSM6811049				16995	I1	LEC	TC	L2-IT	GSM6787826				5179	C3	cortex	OC	L2/3-IT	GSM6843855
	26342	L1	LEC	TC	L4_6	GSM6811174				9677	E4	MTG	TC	L4	GSM5160890				5180	C3	cortex	OC	L4_6	GSM6843863
	27315	L1	LEC	TC	L4_6	GSM6812252				9728	E4	MTG	TC	L4	GSM5161173				5181	C3	cortex	OC	L2/3-IT	GSM6843865
	27354	L1	LEC	TC	L4_6	GSM6812295				9794	E4	MTG	TC	L4	GSM5161432				5182	C3	cortex	OC	L4_6	GSM6843869
	8566	D3	A46	FC	L2/3-IT	GSM6790361				9965	E4	MTG	TC	L4	GSM5162795				5183	C3	cortex	OC	L2/3-IT	GSM6843870
	27233	L1	LEC	TC	L2/3-IT	GSM6812159				9718	E4	MTG	TC	L2-IT	GSM5161079				5184	C3	cortex	OC	L2/3-IT	GSM6843872
	16306	H3	A24	FC	L4_6	GSM6869175				16042	I1	LEC	TC	L2-IT	GSM6786567				5185	C3	cortex	OC	L2/3-IT	GSM6843878
	27182	L1	LEC	TC	L4_6	GSM6812104				16172	I1	LEC	TC	L2-IT	GSM6786727				5186	C3	cortex	OC	L2/3-IT	GSM6843879
	27212	L1	LEC	TC	L4_6	GSM6812136				16450	I1	LEC	TC	L2-IT	GSM6787122				5187	C3	cortex	OC	L2/3-IT	GSM6843886
	27537	L1	LEC	TC	L2/3-IT	GSM6812514				16133	I1	LEC	TC	L2-IT	GSM6786674				5188	C3	cortex	OC	L2/3-IT	GSM6843900
	20394	J1	V1C	OC	L2/3-IT	GSM6740211				16550	I1	LEC	TC	L2-IT	GSM6787261				5189	C3	cortex	OC	L2/3-IT	GSM6843918
	27549	L1	LEC	TC	L2/3-IT	GSM6812528				9616	E4	MTG	TC	L4	GSM5160459				5190	C3	cortex	OC	L4_6	GSM6843928
	24898	K1	FI	FC	L4_6	GSM6839521				9693	E4	MTG	TC	L4	GSM5160944				5191	C3	cortex	OC	L4_6	GSM6843936
	26209	L1	LEC	TC	L4_6	GSM6811017				9713	E4	MTG	TC	L4	GSM5161069				5192	C3	cortex	OC	L2/3-IT	GSM6843937
	23273	K1	FI	FC	L4_6	GSM6837768				9777	E4	MTG	TC	L4	GSM5161328				5193	C3	cortex	OC	L2/3-IT	GSM6843957
	26479	L1	LEC	TC	L4_6	GSM6811324				15571	I1	LEC	TC	L4	GSM6785908				5194	C3	cortex	OC	L2/3-IT	GSM6843959
	25751	L1	LEC	TC	L4_6	GSM6810487				16340	I1	LEC	TC	L4	GSM6786948				5195	C3	cortex	OC	L4_6	GSM6843960
	23698	K1	FI	FC	L4_6	GSM6838239				9933	E4	MTG	TC	L2-IT	GSM5162452				5196	C3	cortex	OC	L2/3-IT	GSM6843963
	23947	K1	FI	FC	L4_6	GSM6838508				15909	I1	LEC	TC	L2-IT	GSM6786394				5197	C3	cortex	OC	L2/3-IT	GSM6843969
	27137	L1	LEC	TC	L4_6	GSM6812055				16687	I1	LEC	TC	L2-IT	GSM6787440				5198	C3	cortex	OC	L4_6	GSM6843985
	27169	L1	LEC	TC	L4_6	GSM6812091				9840	E4	MTG	TC	L4	GSM5161731				5199	C3	cortex	OC	L2/3-IT	GSM6843992
	25662	L1	LEC	TC	L2/3-IT	GSM6810387				15714	I1	LEC	TC	L4	GSM6786145				5200	C3	cortex	OC	L2/3-IT	GSM6843993
	22930	K1	FI	FC	L4_6	GSM6837401				16466	I1	LEC	TC	L2-IT	GSM6787146				5201	C3	cortex	OC	L4_6	GSM6843994
	27235	L1	LEC	TC	L4_6	GSM6812161				9615	E4	MTG	TC	L4	GSM5160456				5202	C3	cortex	OC	L2/3-IT	GSM6843998
	25808	L1	LEC	TC	L4_6	GSM6810550				9950	E4	MTG	TC	L2-IT	GSM5162587				5203	C3	cortex	OC	L4_6	GSM6844010
	16360	H3	A24	FC	L2/3-IT	GSM6869325				16068	I1	LEC	TC	L2-IT	GSM6786598				5204	C3	cortex	OC	L2/3-IT	GSM6844021
	24056	K1	FI	FC	L4_6	GSM6838621				17086	I1	LEC	TC	L2-IT	GSM6787929				5205	C3	cortex	OC	L2/3-IT	GSM6844023
	25941	L1	LEC	TC	L4_6	GSM6810707				10004	E4	MTG	TC	L4	GSM5163164				5206	C3	cortex	OC	L2/3-IT	GSM6844027
	26791	L1	LEC	TC	L2/3-IT	GSM6811669				16957	I1	LEC	TC	L2-IT	GSM6787785				5207	C3	cortex	OC	L2/3-IT	GSM6844030
	25821	L1	LEC	TC	L4_6	GSM6810564				22089	L2	A1C	TC	L2-IT	GSM7292761				5208	C3	cortex	OC	L2/3-IT	GSM6844037
	26884	L1	LEC	TC	L4_6	GSM6811773				9767	E4	MTG	TC	L4	GSM5161301				5209	C3	cortex	OC	L2/3-IT	GSM6844048
	24672	K1	FI	FC	L2/3-IT	GSM6839282				9892	E4	MTG	TC	L4	GSM5162158				5210	C3	cortex	OC	L4_6	GSM6844049
	27296	L1	LEC	TC	L2/3-IT	GSM6812232				15039	I1	LEC	TC	L2-IT	GSM6784954				5211	C3	cortex	OC	L2/3-IT	GSM6844053
	25564	L1	LEC	TC	L4_6	GSM6810282				15060	I1	LEC	TC	L2-IT	GSM6784985				5212	C3	cortex	OC	L2/3-IT	GSM6844054
	27528	L1	LEC	TC	L2/3-IT	GSM6812505				15626	I1	LEC	TC	L2-IT	GSM6785993				5213	C3	cortex	OC	L4_6	GSM6844057
	27310	L1	LEC	TC	L4_6	GSM6812247				16222	I1	LEC	TC	L2-IT	GSM6786795				5214	C3	cortex	OC	L4_6	GSM6844061
	24741	K1	FI	FC	L4_6	GSM6839352				16795	I1	LEC	TC	L2-IT	GSM6787575				5215	C3	cortex	OC	L4_6	GSM6844062
	25816	L1	LEC	TC	L4_6	GSM6810559				16470	I1	LEC	TC	L4	GSM6787152				5216	C3	cortex	OC	L2/3-IT	GSM6844064
	24172	K1	FI	FC	L2/3-IT	GSM6838744				15124	I1	LEC	TC	L2-IT	GSM6785066				5217	C3	cortex	OC	L2/3-IT	GSM6844069
	25679	L1	LEC	TC	L2/3-IT	GSM6810405				9624	E4	MTG	TC	L4	GSM5160491				5218	C3	cortex	OC	L4_6	GSM6844070
	25863	L1	LEC	TC	L2/3-IT	GSM6810616				10017	E4	MTG	TC	L2-IT	GSM5163201				5219	C3	cortex	OC	L2/3-IT	GSM6844073
	26293	L1	LEC	TC	L2/3-IT	GSM6811118				9871	E4	MTG	TC	L4	GSM5162018				5220	C3	cortex	OC	L2/3-IT	GSM6844081
	27289	L1	LEC	TC	L2/3-IT	GSM6812222				16077	I1	LEC	TC	L2-IT	GSM6786607				5221	C3	cortex	OC	L2/3-IT	GSM6844083
	27297	L1	LEC	TC	L2/3-IT	GSM6812233				9700	E4	MTG	TC	L4	GSM5160994				5222	C3	cortex	OC	L2/3-IT	GSM6844085
	24908	K1	FI	FC	L4_6	GSM6839533				16519	I1	LEC	TC	L2-IT	GSM6787229				5223	C3	cortex	OC	L2/3-IT	GSM6844087
	26254	L1	LEC	TC	L4_6	GSM6811070				16904	I1	LEC	TC	L2-IT	GSM6787721				5224	C3	cortex	OC	L2/3-IT	GSM6844090
	26653	L1	LEC	TC	L4_6	GSM6811512				15618	I1	LEC	TC	L2-IT	GSM6785980				5225	C3	cortex	OC	L2/3-IT	GSM6844098
	27525	L1	LEC	TC	L2/3-IT	GSM6812500				17033	I1	LEC	TC	L2-IT	GSM6787869				5226	C3	cortex	OC	L2/3-IT	GSM6844106
	24105	K1	FI	FC	L4_6	GSM6838673				9986	E4	MTG	TC	L4	GSM5162977				5227	C3	cortex	OC	L2/3-IT	GSM6844107
	24258	K1	FI	FC	L4_6	GSM6838834				21952	L2	A1C	TC	L4	GSM7292378				5228	C3	cortex	OC	L4_6	GSM6844158
	25462	L1	LEC	TC	L4_6	GSM6810172				16737	I1	LEC	TC	L2-IT	GSM6787503				5229	C3	cortex	OC	L2/3-IT	GSM6844161
	8586	D3	A46	FC	L2/3-IT	GSM6791495				10036	E4	MTG	TC	L4	GSM5163251				5230	C3	cortex	OC	L2/3-IT	GSM6844162
	9191	D4	MTG	TC	L2/3-IT	GSM6799806				16301	I1	LEC	TC	L4	GSM6786900				5231	C3	cortex	OC	L2/3-IT	GSM6844165
	27156	L1	LEC	TC	L4_6	GSM6812078				16489	I1	LEC	TC	L4	GSM6787177				5232	C3	cortex	OC	L2/3-IT	GSM6844172
	26698	L1	LEC	TC	L2/3-IT	GSM6811561				9891	E4	MTG	TC	L2-IT	GSM5162153				5233	C3	cortex	OC	L2/3-IT	GSM6844173
	27061	L1	LEC	TC	L4_6	GSM6811969				15973	I1	LEC	TC	L2-IT	GSM6786467				5234	C3	cortex	OC	L2/3-IT	GSM6844175
	25999	L1	LEC	TC	L2/3-IT	GSM6810771				9721	E4	MTG	TC	L4	GSM5161126				5235	C3	cortex	OC	L4_6	GSM6844181
	23484	K1	FI	FC	L4_6	GSM6838002				9842	E4	MTG	TC	L2-IT	GSM5161737				5236	C3	cortex	OC	L2/3-IT	GSM6844186
	24115	K1	FI	FC	L4_6	GSM6838683				15696	I1	LEC	TC	L2-IT	GSM6786115				5237	C3	cortex	OC	L2/3-IT	GSM6844187
	27204	L1	LEC	TC	L4_6	GSM6812128				16947	I1	LEC	TC	L2-IT	GSM6787772				5238	C3	cortex	OC	L2/3-IT	GSM6844190
	8473	D3	A46	FC	L2/3-IT	GSM6791910				9737	E4	MTG	TC	L4	GSM5161204				5239	C3	cortex	OC	L2/3-IT	GSM6844193
	23436	K1	FI	FC	L2/3-IT	GSM6837949				9963	E4	MTG	TC	L2-IT	GSM5162793				5240	C3	cortex	OC	L2/3-IT	GSM6844198
	25613	L1	LEC	TC	L2/3-IT	GSM6810335				16249	I1	LEC	TC	L2-IT	GSM6786833				5241	C3	cortex	OC	L2/3-IT	GSM6844209
	25229	K1	FI	FC	L4_6	GSM6839879				22030	L2	A1C	TC	L2-IT	GSM7292537				5242	C3	cortex	OC	L2/3-IT	GSM6844222
	8444	D3	A46	FC	L2/3-IT	GSM6790389				10034	E4	MTG	TC	L4	GSM5163247				5243	C3	cortex	OC	L2/3-IT	GSM6844223
	25641	L1	LEC	TC	L2/3-IT	GSM6810365				10026	E4	MTG	TC	L2-IT	GSM5163223				5244	C3	cortex	OC	L2/3-IT	GSM6844229
	16321	H3	A24	FC	L4_6	GSM6869205				16326	I1	LEC	TC	L2-IT	GSM6786932				5245	C3	cortex	OC	L2/3-IT	GSM6844242
	22924	K1	FI	FC	L4_6	GSM6837395				9634	E4	MTG	TC	L4	GSM5160518				5246	C3	cortex	OC	L2/3-IT	GSM6844246
	23464	K1	FI	FC	L2/3-IT	GSM6837981				16608	I1	LEC	TC	L4	GSM6787351				5247	C3	cortex	OC	L2/3-IT	GSM6844251
	20932	J1	V1C	OC	L2/3-IT	GSM6740823				16731	I1	LEC	TC	L4	GSM6787494				5248	C3	cortex	OC	L2/3-IT	GSM6844257
	16223	H2	A25	FC	L4_6	GSM6155666				16199	I1	LEC	TC	L2-IT	GSM6786764				5249	C3	cortex	OC	L2/3-IT	GSM6844260
	21559	J1	V1C	OC	L4_6	GSM6741556				16754	I1	LEC	TC	L4	GSM6787525				5250	C3	cortex	OC	L2/3-IT	GSM6844262
	24685	K1	FI	FC	L2/3-IT	GSM6839295				15753	I1	LEC	TC	L2-IT	GSM6786189				5251	C3	cortex	OC	L2/3-IT	GSM6844282
	26929	L1	LEC	TC	L2/3-IT	GSM6811824				9731	E4	MTG	TC	L4	GSM5161183				5252	C3	cortex	OC	L2/3-IT	GSM6844286
	23248	K1	FI	FC	L4_6	GSM6837742				9879	E4	MTG	TC	L4	GSM5162076				5253	C3	cortex	OC	L2/3-IT	GSM6844291
	23275	K1	FI	FC	L4_6	GSM6837771				15821	I1	LEC	TC	L4	GSM6786271				5254	C3	cortex	OC	L2/3-IT	GSM6844293
	23456	K1	FI	FC	L4_6	GSM6837971				9664	E4	MTG	TC	L4	GSM5160782				5255	C3	cortex	OC	L2/3-IT	GSM6844296
	20505	J1	V1C	OC	L4_6	GSM6740334				9821	E4	MTG	TC	L4	GSM5161665				5256	C3	cortex	OC	L2/3-IT	GSM6844312
	8584	D3	A46	FC	L2/3-IT	GSM6791441				9790	E4	MTG	TC	L2-IT	GSM5161415				5257	C3	cortex	OC	L4_6	GSM6844314
	23486	K1	FI	FC	L2/3-IT	GSM6838004				15460	I1	LEC	TC	L2-IT	GSM6785744				5258	C3	cortex	OC	L2/3-IT	GSM6844318
	25656	L1	LEC	TC	L4_6	GSM6810381				15948	I1	LEC	TC	L2-IT	GSM6786439				5259	C3	cortex	OC	L2/3-IT	GSM6844322
	27094	L1	LEC	TC	L2/3-IT	GSM6812007				16534	I1	LEC	TC	L2-IT	GSM6787244				5260	C3	cortex	OC	L4_6	GSM6844323
	16310	H3	A24	FC	L4_6	GSM6869180				9857	E4	MTG	TC	L4	GSM5161858				5261	C3	cortex	OC	L2/3-IT	GSM6844324
	22328	J1	V1C	OC	L2/3-IT	GSM6742465				17077	I1	LEC	TC	L2-IT	GSM6787918				5262	C3	cortex	OC	L2/3-IT	GSM6844345
	8860	D3	A46	FC	L4_6	GSM6790539				16061	I1	LEC	TC	L4	GSM6786591				5263	C3	cortex	OC	L2/3-IT	GSM6844346
	23446	K1	FI	FC	L2/3-IT	GSM6837960				22368	L2	A1C	TC	L4	GSM7294197				5264	C3	cortex	OC	L4_6	GSM6844347
	25586	L1	LEC	TC	L2/3-IT	GSM6810307				16022	I1	LEC	TC	L2-IT	GSM6786539				5265	C3	cortex	OC	L4_6	GSM6844356
	23462	K1	FI	FC	L4_6	GSM6837979				9872	E4	MTG	TC	L4	GSM5162031				5266	C3	cortex	OC	L2/3-IT	GSM6844366
	16959	H4	LEC	TC	L4_6	GSM7149449				16376	I1	LEC	TC	L2-IT	GSM6786991				5267	C3	cortex	OC	L4_6	GSM6844369
	23383	K1	FI	FC	L4_6	GSM6837892				16762	I1	LEC	TC	L2-IT	GSM6787533				5268	C3	cortex	OC	L2/3-IT	GSM6844370
	24205	K1	FI	FC	L4_6	GSM6838778				16420	I1	LEC	TC	L4	GSM6787083				5269	C3	cortex	OC	L2/3-IT	GSM6844371
	24844	K1	FI	FC	L4_6	GSM6839460				15699	I1	LEC	TC	L2-IT	GSM6786119				5270	C3	cortex	OC	L4_6	GSM6844375
	25260	K1	FI	FC	L4_6	GSM6839911				10008	E4	MTG	TC	L4	GSM5163175				5271	C3	cortex	OC	L2/3-IT	GSM6844377
	25455	L1	LEC	TC	L4_6	GSM6810165				16346	I1	LEC	TC	L2-IT	GSM6786956				5272	C3	cortex	OC	L4_6	GSM6844378
	26932	L1	LEC	TC	L4_6	GSM6811828				16357	I1	LEC	TC	L4	GSM6786969				5273	C3	cortex	OC	L4_6	GSM6844399
	27254	L1	LEC	TC	L2/3-IT	GSM6812183				15141	I1	LEC	TC	L2-IT	GSM6785083				5274	C3	cortex	OC	L4_6	GSM6844401
	9378	D4	MTG	TC	L4_6	GSM6800146				9900	E4	MTG	TC	L4	GSM5162257				5275	C3	cortex	OC	L2/3-IT	GSM6844828
	23229	K1	FI	FC	L4_6	GSM6837720				22400	L2	A1C	TC	L4	GSM7294246				5276	C3	cortex	OC	L4_6	GSM6844848
	27469	L1	LEC	TC	L2/3-IT	GSM6812440				16267	I1	LEC	TC	L2-IT	GSM6786857				5277	C3	cortex	OC	L2/3-IT	GSM6844857
	24324	K1	FI	FC	L4_6	GSM6838904				9987	E4	MTG	TC	L4	GSM5163000				5278	C3	cortex	OC	L4_6	GSM6844863
	24811	K1	FI	FC	L2/3-IT	GSM6839425				10001	E4	MTG	TC	L2-IT	GSM5163151				5279	C3	cortex	OC	L2/3-IT	GSM6844864
	27144	L1	LEC	TC	L2/3-IT	GSM6812064				16038	I1	LEC	TC	L2-IT	GSM6786561				5280	C3	cortex	OC	L2/3-IT	GSM6844870
	23765	K1	FI	FC	L4_6	GSM6838309				16658	I1	LEC	TC	L2-IT	GSM6787410				5281	C3	cortex	OC	L2/3-IT	GSM6844873
	27343	L1	LEC	TC	L4_6	GSM6812284				17073	I1	LEC	TC	L2-IT	GSM6787913				5282	C3	cortex	OC	L2/3-IT	GSM6844897
	25771	L1	LEC	TC	L2/3-IT	GSM6810509				9687	E4	MTG	TC	L4	GSM5160933				5283	C3	cortex	OC	L2/3-IT	GSM6844919
	8786	D3	A46	FC	L4_6	GSM6790040				9814	E4	MTG	TC	L4	GSM5161637				5284	C3	cortex	OC	L4_6	GSM6844937
	24427	K1	FI	FC	L4_6	GSM6839014				17027	I1	LEC	TC	L4	GSM6787861				5285	C3	cortex	OC	L2/3-IT	GSM6844942
	23441	K1	FI	FC	L2/3-IT	GSM6837954				15121	I1	LEC	TC	L2-IT	GSM6785063				5286	C3	cortex	OC	L4_6	GSM6844945
	26061	L1	LEC	TC	L2/3-IT	GSM6810841				16145	I1	LEC	TC	L2-IT	GSM6786689				5287	C3	cortex	OC	L2/3-IT	GSM6844959
	26267	L1	LEC	TC	L2/3-IT	GSM6811086				16304	I1	LEC	TC	L2-IT	GSM6786907				5288	C3	cortex	OC	L4_6	GSM6844961
	20460	J1	V1C	OC	L4_6	GSM6740287				16329	I1	LEC	TC	L4	GSM6786935				5289	C3	cortex	OC	L4_6	GSM6844966
	23367	K1	FI	FC	L4_6	GSM6837875				9633	E4	MTG	TC	L4	GSM5160511				5290	C3	cortex	OC	L2/3-IT	GSM6844967
	25745	L1	LEC	TC	L2/3-IT	GSM6810481				9729	E4	MTG	TC	L4	GSM5161177				5291	C3	cortex	OC	L4_6	GSM6844968
	24054	K1	FI	FC	L4_6	GSM6838619				16193	I1	LEC	TC	L4	GSM6786756				5292	C3	cortex	OC	L4_6	GSM6844974
	24757	K1	FI	FC	L4_6	GSM6839369				17030	I1	LEC	TC	L4	GSM6787866				5293	C3	cortex	OC	L2/3-IT	GSM6844975
	25252	K1	FI	FC	L4_6	GSM6839903				16356	I1	LEC	TC	L2-IT	GSM6786967				5294	C3	cortex	OC	L4_6	GSM6844983
	23392	K1	FI	FC	L2/3-IT	GSM6837901				9836	E4	MTG	TC	L4	GSM5161718				5295	C3	cortex	OC	L2/3-IT	GSM6844984
	24061	K1	FI	FC	L2/3-IT	GSM6838626				15376	I1	LEC	TC	L2-IT	GSM6785616				5296	C3	cortex	OC	L2/3-IT	GSM6844987
	25133	K1	FI	FC	L2/3-IT	GSM6839778				17110	I1	LEC	TC	L2-IT	GSM6787958				5297	C3	cortex	OC	L2/3-IT	GSM6844988
	25448	L1	LEC	TC	L2/3-IT	GSM6810157				21905	L2	A1C	TC	L2-IT	GSM7292267				5298	C3	cortex	OC	L2/3-IT	GSM6844989
	26709	L1	LEC	TC	L2/3-IT	GSM6811572				15648	I1	LEC	TC	L4	GSM6786028				5299	C3	cortex	OC	L2/3-IT	GSM6844991
	27026	L1	LEC	TC	L2/3-IT	GSM6811930				9669	E4	MTG	TC	L2-IT	GSM5160825				5300	C3	cortex	OC	L2/3-IT	GSM6844994
	8754	D3	A46	FC	L4_6	GSM6790383				9971	E4	MTG	TC	L2-IT	GSM5162809				5301	C3	cortex	OC	L4_6	GSM6844998
	24257	K1	FI	FC	L4_6	GSM6838833				16633	I1	LEC	TC	L2-IT	GSM6787378				5417	C4	HIP	HIP	DG	GSM6556641
	26844	L1	LEC	TC	L4_6	GSM6811729				15493	I1	LEC	TC	L4	GSM6785786				5429	C4	HIP	HIP	DG	GSM6556663
	9300	D4	MTG	TC	L2/3-IT	GSM6799584				9797	E4	MTG	TC	L2-IT	GSM5161446				5438	C4	HIP	HIP	DG	GSM6556678
	25516	L1	LEC	TC	L2/3-IT	GSM6810228				15165	I1	LEC	TC	L2-IT	GSM6785114				5480	C4	HIP	HIP	DG	GSM6556800
	23952	K1	FI	FC	L4_6	GSM6838513				16266	I1	LEC	TC	L4	GSM6786854				5481	C4	HIP	HIP	CA	GSM6556801
	22915	K1	FI	FC	L4_6	GSM6837386				16632	I1	LEC	TC	L4	GSM6787377				5499	C4	HIP	HIP	DG	GSM6556889
	24165	K1	FI	FC	L4_6	GSM6838736				16902	I1	LEC	TC	L4	GSM6787719				5532	C4	HIP	HIP	DG	GSM6556961
	26204	L1	LEC	TC	L4_6	GSM6811011				16000	I1	LEC	TC	L2-IT	GSM6786504				5533	C4	HIP	HIP	DG	GSM6556964
	26297	L1	LEC	TC	L2/3-IT	GSM6811122				15827	I1	LEC	TC	L4	GSM6786279				5556	C4	HIP	HIP	DG	GSM6557032
	24018	K1	FI	FC	L4_6	GSM6838582				16952	I1	LEC	TC	L4	GSM6787778				5559	C4	HIP	HIP	DG	GSM6557043
	8474	D3	A46	FC	L2/3-IT	GSM6789011				16338	I1	LEC	TC	L2-IT	GSM6786946				5567	C4	HIP	HIP	DG	GSM6557095
	26809	L1	LEC	TC	L2/3-IT	GSM6811690				9682	E4	MTG	TC	L4	GSM5160922				5572	C4	HIP	HIP	DG	GSM6557212
	27648	L1	LEC	TC	L2/3-IT	GSM6812634				9757	E4	MTG	TC	L4	GSM5161269				5573	C4	HIP	HIP	DG	GSM6557217
	24114	K1	FI	FC	L4_6	GSM6838682				10003	E4	MTG	TC	L2-IT	GSM5163159				5574	C4	HIP	HIP	DG	GSM6557219
	9167	D4	MTG	TC	L2/3-IT	GSM6798337				15109	I1	LEC	TC	L2-IT	GSM6785048				5581	C4	HIP	HIP	DG	GSM6557233
	24910	K1	FI	FC	L2/3-IT	GSM6839535				15388	I1	LEC	TC	L2-IT	GSM6785632				5587	C4	HIP	HIP	DG	GSM6557243
	27265	L1	LEC	TC	L2/3-IT	GSM6812195				15390	I1	LEC	TC	L2-IT	GSM6785635				5588	C4	HIP	HIP	DG	GSM6557244
	27456	L1	LEC	TC	L2/3-IT	GSM6812424				15686	I1	LEC	TC	L2-IT	GSM6786091				5599	C4	HIP	HIP	DG	GSM6557265
	24209	K1	FI	FC	L4_6	GSM6838782				9886	E4	MTG	TC	L4	GSM5162115				5602	C4	HIP	HIP	DG	GSM6557296
	25250	K1	FI	FC	L2/3-IT	GSM6839901				16337	I1	LEC	TC	L4	GSM6786945				5611	C4	HIP	HIP	DG	GSM6557341
	25559	L1	LEC	TC	L2/3-IT	GSM6810276				15555	I1	LEC	TC	L2-IT	GSM6785887				5612	C4	HIP	HIP	DG	GSM6557344
	27326	L1	LEC	TC	L2/3-IT	GSM6812265				9796	E4	MTG	TC	L4	GSM5161444				5622	C4	HIP	HIP	DG	GSM6557384
	8820	D3	A46	FC	L4_6	GSM6789042				9826	E4	MTG	TC	L4	GSM5161682				5623	C4	HIP	HIP	DG	GSM6557393
	22260	J1	V1C	OC	L4_6	GSM6742391				9643	E4	MTG	TC	L2-IT	GSM5160558				5624	C4	HIP	HIP	DG	GSM6557398
	26279	L1	LEC	TC	L4_6	GSM6811101				9760	E4	MTG	TC	L2-IT	GSM5161273				5626	C4	HIP	HIP	DG	GSM6557409
	27461	L1	LEC	TC	L4_6	GSM6812429				9785	E4	MTG	TC	L2-IT	GSM5161353				5646	C4	HIP	HIP	DG	GSM6557538
	23361	K1	FI	FC	L2/3-IT	GSM6837868				9888	E4	MTG	TC	L2-IT	GSM5162127				5684	C4	HIP	HIP	DG	GSM6557646
	26094	L1	LEC	TC	L2/3-IT	GSM6810876				15990	I1	LEC	TC	L2-IT	GSM6786488				5695	C4	HIP	HIP	CA	GSM6557678
	8842	D3	A46	FC	L4_6	GSM6790199				16790	I1	LEC	TC	L2-IT	GSM6787567				5701	C4	HIP	HIP	DG	GSM6557702
	25207	K1	FI	FC	L4_6	GSM6839856				9819	E4	MTG	TC	L4	GSM5161660				5708	C4	HIP	HIP	DG	GSM6557719
	8481	D3	A46	FC	L2/3-IT	GSM6789884				9894	E4	MTG	TC	L4	GSM5162167				5709	C4	HIP	HIP	DG	GSM6557723
	4517	C1	A5-A7	PC	L2/3-IT	GSM5408302				9902	E4	MTG	TC	L2-IT	GSM5162274				5712	C4	HIP	HIP	DG	GSM6557726
	23449	K1	FI	FC	L2/3-IT	GSM6837964				15723	I1	LEC	TC	L2-IT	GSM6786155				5714	C4	HIP	HIP	DG	GSM6557735
	27575	L1	LEC	TC	L2/3-IT	GSM6812554				15926	I1	LEC	TC	L2-IT	GSM6786416				5717	C4	HIP	HIP	DG	GSM6557739
	8849	D3	A46	FC	L4_6	GSM6791790				16862	I1	LEC	TC	L4	GSM6787667				5724	C4	HIP	HIP	DG	GSM6557748
	19494	I4	A38	TC	L4_6	GSM6136649				9786	E4	MTG	TC	L2-IT	GSM5161360				5729	C4	HIP	HIP	CA	GSM6557763
	9282	D4	MTG	TC	L2/3-IT	GSM6799038				15473	I1	LEC	TC	L2-IT	GSM6785759				5778	C4	HIP	HIP	CA	GSM6557955
	24048	K1	FI	FC	L2/3-IT	GSM6838613				15754	I1	LEC	TC	L2-IT	GSM6786190				5808	C4	HIP	HIP	DG	GSM6558014
	24213	K1	FI	FC	L4_6	GSM6838786				15971	I1	LEC	TC	L2-IT	GSM6786465				5813	C4	HIP	HIP	DG	GSM6558025
	25887	L1	LEC	TC	L4_6	GSM6810645				17017	I1	LEC	TC	L2-IT	GSM6787851				5819	C4	HIP	HIP	DG	GSM6558037
	8544	D3	A46	FC	L2/3-IT	GSM6789471				9869	E4	MTG	TC	L4	GSM5161954				5821	C4	HIP	HIP	DG	GSM6558040
	23479	K1	FI	FC	L2/3-IT	GSM6837997				15389	I1	LEC	TC	L4	GSM6785633				5822	C4	HIP	HIP	DG	GSM6558041
	24034	K1	FI	FC	L4_6	GSM6838598				22447	L2	A1C	TC	L2-IT	GSM7294454				5823	C4	HIP	HIP	DG	GSM6558043
	25885	L1	LEC	TC	L4_6	GSM6810640				9904	E4	MTG	TC	L4	GSM5162290				5826	C4	HIP	HIP	DG	GSM6558048
	26139	L1	LEC	TC	L4_6	GSM6810931				10023	E4	MTG	TC	L4	GSM5163215				5827	C4	HIP	HIP	DG	GSM6558051
	23384	K1	FI	FC	L2/3-IT	GSM6837893				9993	E4	MTG	TC	L2-IT	GSM5163112				5829	C4	HIP	HIP	DG	GSM6558055
	24712	K1	FI	FC	L4_6	GSM6839322				16780	I1	LEC	TC	L2-IT	GSM6787555				5830	C4	HIP	HIP	CA	GSM6558058
	27264	L1	LEC	TC	L4_6	GSM6812194				17043	I1	LEC	TC	L2-IT	GSM6787879				5834	C4	HIP	HIP	DG	GSM6558062
	23480	K1	FI	FC	L2/3-IT	GSM6837998				17099	I1	LEC	TC	L2-IT	GSM6787944				5835	C4	HIP	HIP	DG	GSM6558066
	25924	L1	LEC	TC	L2/3-IT	GSM6810688				15862	I1	LEC	TC	L4	GSM6786317				5836	C4	HIP	HIP	DG	GSM6558070
	26856	L1	LEC	TC	L2/3-IT	GSM6811741				16100	I1	LEC	TC	L4	GSM6786634				5838	C4	HIP	HIP	DG	GSM6558075
	8495	D3	A46	FC	L2/3-IT	GSM6791536				22041	L2	A1C	TC	L4	GSM7292567				5843	C4	HIP	HIP	DG	GSM6558087
	8524	D3	A46	FC	L2/3-IT	GSM6791797				15030	I1	LEC	TC	L2-IT	GSM6784937				5846	C4	HIP	HIP	DG	GSM6558092
	24749	K1	FI	FC	L2/3-IT	GSM6839360				23543	M2	LEC	TC	L4	GSM7154468				5848	C4	HIP	HIP	DG	GSM6558095
	21851	J1	V1C	OC	L2/3-IT	GSM6741886				9851	E4	MTG	TC	L2-IT	GSM5161781				5850	C4	HIP	HIP	DG	GSM6558099
	26974	L1	LEC	TC	L2/3-IT	GSM6811877				9953	E4	MTG	TC	L4	GSM5162607				5851	C4	HIP	HIP	DG	GSM6558100
	22913	K1	FI	FC	L4_6	GSM6837384				16269	I1	LEC	TC	L4	GSM6786863				5853	C4	HIP	HIP	DG	GSM6558102
	20461	J1	V1C	OC	L4_6	GSM6740288				16628	I1	LEC	TC	L4	GSM6787373				5855	C4	HIP	HIP	DG	GSM6558106
	25753	L1	LEC	TC	L2/3-IT	GSM6810489				16006	I1	LEC	TC	L2-IT	GSM6786512				5856	C4	HIP	HIP	DG	GSM6558107
	26643	L1	LEC	TC	L2/3-IT	GSM6811500				9739	E4	MTG	TC	L2-IT	GSM5161206				5858	C4	HIP	HIP	CA	GSM6558111
	8655	D3	A46	FC	L4_6	GSM6790591				9911	E4	MTG	TC	L2-IT	GSM5162364				5863	C4	HIP	HIP	DG	GSM6558122
	24681	K1	FI	FC	L4_6	GSM6839291				9970	E4	MTG	TC	L2-IT	GSM5162806				5864	C4	HIP	HIP	DG	GSM6558125
	25531	L1	LEC	TC	L2/3-IT	GSM6810245				9647	E4	MTG	TC	L4	GSM5160566				5868	C4	HIP	HIP	DG	GSM6558139
	27189	L1	LEC	TC	L2/3-IT	GSM6812112				9878	E4	MTG	TC	L4	GSM5162074				5885	C4	HIP	HIP	DG	GSM6558416
	24183	K1	FI	FC	L4_6	GSM6838755				9880	E4	MTG	TC	L4	GSM5162081				5889	C4	HIP	HIP	CA	GSM6558457
	25896	L1	LEC	TC	L4_6	GSM6810656				17113	I1	LEC	TC	L4	GSM6787961				5890	C4	HIP	HIP	DG	GSM6558462
	26833	L1	LEC	TC	L4_6	GSM6811718				9681	E4	MTG	TC	L4	GSM5160921				5924	C4	HIP	HIP	DG	GSM6558730
	27917	L1	LEC	TC	L4_6	GSM6812944				9750	E4	MTG	TC	L2-IT	GSM5161244				5945	C4	HIP	HIP	DG	GSM6558828
	15828	H2	A25	FC	L2/3-IT	GSM6154610				17549	J1	MEC	TC	L2-IT	GSM6227259				5951	C4	HIP	HIP	DG	GSM6558836
	9212	D4	MTG	TC	L2/3-IT	GSM6799018				9749	E4	MTG	TC	L4	GSM5161243				5955	C4	HIP	HIP	DG	GSM6558842
	4879	C1	A5-A7	PC	L4_6	GSM5408221				16620	I1	LEC	TC	L4	GSM6787364				5956	C4	HIP	HIP	CA	GSM6558843
	25752	L1	LEC	TC	L4_6	GSM6810488				16611	I1	LEC	TC	L2-IT	GSM6787354				5958	C4	HIP	HIP	DG	GSM6558845
	8602	D3	A46	FC	L2/3-IT	GSM6789168				16713	I1	LEC	TC	L2-IT	GSM6787471				5964	C4	HIP	HIP	CA	GSM6558854
	21913	J1	V1C	OC	L2/3-IT	GSM6741950				16989	I1	LEC	TC	L2-IT	GSM6787819				5966	C4	HIP	HIP	DG	GSM6558857
	25889	L1	LEC	TC	L2/3-IT	GSM6810648				9640	E4	MTG	TC	L2-IT	GSM5160542				5968	C4	HIP	HIP	DG	GSM6558859
	26206	L1	LEC	TC	L2/3-IT	GSM6811013				15367	I1	LEC	TC	L2-IT	GSM6785605				6002	C4	HIP	HIP	DG	GSM6559020
	8669	D3	A46	FC	L4_6	GSM6789617				15716	I1	LEC	TC	L2-IT	GSM6786147				6030	C4	HIP	HIP	DG	GSM6559131
	23965	K1	FI	FC	L4_6	GSM6838526				16740	I1	LEC	TC	L2-IT	GSM6787507				6058	C4	HIP	HIP	DG	GSM6559164
	8589	D3	A46	FC	L2/3-IT	GSM6791599				16147	I1	LEC	TC	L2-IT	GSM6786691				6064	C4	HIP	HIP	DG	GSM6559173
	23398	K1	FI	FC	L4_6	GSM6837907				16616	I1	LEC	TC	L2-IT	GSM6787360				6065	C4	HIP	HIP	DG	GSM6559175
	22909	K1	FI	FC	L2/3-IT	GSM6837380				9636	E4	MTG	TC	L2-IT	GSM5160523				6066	C4	HIP	HIP	CA	GSM6559176
	8878	D3	A46	FC	L4_6	GSM6790072				9788	E4	MTG	TC	L2-IT	GSM5161388				6074	C4	HIP	HIP	DG	GSM6559189
	24058	K1	FI	FC	L4_6	GSM6838623				9850	E4	MTG	TC	L2-IT	GSM5161779				6080	C4	HIP	HIP	DG	GSM6559203
	25287	K1	FI	FC	L4_6	GSM6839942				14974	I1	LEC	TC	L2-IT	GSM6784856				6083	C4	HIP	HIP	DG	GSM6559209
	20390	J1	V1C	OC	L4_6	GSM6740207				16965	I1	LEC	TC	L2-IT	GSM6787793				6084	C4	HIP	HIP	DG	GSM6559210
	26208	L1	LEC	TC	L4_6	GSM6811016				9619	E4	MTG	TC	L4	GSM5160475				6087	C4	HIP	HIP	DG	GSM6559214
	24148	K1	FI	FC	L2/3-IT	GSM6838717				15026	I1	LEC	TC	L4	GSM6784932				6092	C4	HIP	HIP	DG	GSM6559222
	25267	K1	FI	FC	L2/3-IT	GSM6839919				16426	I1	LEC	TC	L2-IT	GSM6787097				6094	C4	HIP	HIP	DG	GSM6559224
	8638	D3	A46	FC	L4_6	GSM6789818				14994	I1	LEC	TC	L4	GSM6784886				6099	C4	HIP	HIP	DG	GSM6559231
	8807	D3	A46	FC	L4_6	GSM6791606				15487	I1	LEC	TC	L4	GSM6785778				6110	C4	HIP	HIP	DG	GSM6559250
	24396	K1	FI	FC	L4_6	GSM6838980				9859	E4	MTG	TC	L2-IT	GSM5161864				6117	C4	HIP	HIP	DG	GSM6559257
	8484	D3	A46	FC	L2/3-IT	GSM6790004				16496	I1	LEC	TC	L2-IT	GSM6787204				6134	C4	HIP	HIP	DG	GSM6559426
	25192	K1	FI	FC	L2/3-IT	GSM6839840				16332	I1	LEC	TC	L2-IT	GSM6786938				6146	C4	HIP	HIP	CA	GSM6559537
	26118	L1	LEC	TC	L2/3-IT	GSM6810907				9761	E4	MTG	TC	L2-IT	GSM5161277				6149	C4	HIP	HIP	DG	GSM6559544
	27608	L1	LEC	TC	L2/3-IT	GSM6812592				15830	I1	LEC	TC	L2-IT	GSM6786282				6150	C4	HIP	HIP	DG	GSM6559545
	8835	D3	A46	FC	L4_6	GSM6790583				16399	I1	LEC	TC	L2-IT	GSM6787043				6153	C4	HIP	HIP	DG	GSM6559551
	8512	D3	A46	FC	L2/3-IT	GSM6790390				15835	I1	LEC	TC	L4	GSM6786287				6155	C4	HIP	HIP	DG	GSM6559556
	21799	J1	V1C	OC	L2/3-IT	GSM6741829				16264	I1	LEC	TC	L4	GSM6786852				6157	C4	HIP	HIP	CA	GSM6559558
	26868	L1	LEC	TC	L2/3-IT	GSM6811754				9838	E4	MTG	TC	L2-IT	GSM5161728				6162	C4	HIP	HIP	DG	GSM6559567
	27112	L1	LEC	TC	L2/3-IT	GSM6812027				15485	I1	LEC	TC	L2-IT	GSM6785774				6165	C4	HIP	HIP	DG	GSM6559570
	26222	L1	LEC	TC	L4_6	GSM6811033				16221	I1	LEC	TC	L2-IT	GSM6786794				6167	C4	HIP	HIP	CA	GSM6559575
	4482	C1	A5-A7	PC	L2/3-IT	GSM5408176				16743	I1	LEC	TC	L2-IT	GSM6787510				8343	E1	cortex	OC	L2/3-IT	GSM6330224
	23245	K1	FI	FC	L2/3-IT	GSM6837739				9882	E4	MTG	TC	L4	GSM5162097				8344	E1	cortex	OC	L2/3-IT	GSM6330225
	24862	K1	FI	FC	L2/3-IT	GSM6839478				17392	J1	MEC	TC	L4	GSM6226973				8350	E1	cortex	OC	L4_6	GSM6330249
	8879	D3	A46	FC	L4_6	GSM6790369				9743	E4	MTG	TC	L2-IT	GSM5161235				8405	E1	cortex	OC	L4_6	GSM6330408
	23360	K1	FI	FC	L4_6	GSM6837867				15927	I1	LEC	TC	L2-IT	GSM6786417				8421	E1	cortex	OC	L2/3-IT	GSM6330440
	27320	L1	LEC	TC	L4_6	GSM6812257				16120	I1	LEC	TC	L2-IT	GSM6786660				8424	E1	cortex	OC	L4_6	GSM6330447
	23755	K1	FI	FC	L2/3-IT	GSM6838299				16621	I1	LEC	TC	L4	GSM6787365				8428	E1	cortex	OC	L4_6	GSM6330458
	25532	L1	LEC	TC	L2/3-IT	GSM6810246				16637	I1	LEC	TC	L4	GSM6787386				8451	E1	cortex	OC	L4_6	GSM6330515
	23559	K1	FI	FC	L4_6	GSM6838083				9708	E4	MTG	TC	L2-IT	GSM5161046				8458	E1	cortex	OC	L4_6	GSM6330606
	24163	K1	FI	FC	L4_6	GSM6838734				15405	I1	LEC	TC	L2-IT	GSM6785654				8482	E1	cortex	OC	L2/3-IT	GSM6330715
	25276	K1	FI	FC	L4_6	GSM6839931				15910	I1	LEC	TC	L2-IT	GSM6786395				8506	E1	cortex	OC	L4_6	GSM6330798
	27018	L1	LEC	TC	L4_6	GSM6811922				15916	I1	LEC	TC	L2-IT	GSM6786401				8539	E1	cortex	OC	L2/3-IT	GSM6330959
	17432	H4	LEC	TC	L2/3-IT	GSM7150429				16282	I1	LEC	TC	L2-IT	GSM6786878				8555	E1	cortex	OC	L2/3-IT	GSM6331086
	23499	K1	FI	FC	L2/3-IT	GSM6838018				9975	E4	MTG	TC	L4	GSM5162852				8561	E1	cortex	OC	L2/3-IT	GSM6331184
	23735	K1	FI	FC	L2/3-IT	GSM6838277				9972	E4	MTG	TC	L2-IT	GSM5162810				8563	E1	cortex	OC	L4_6	GSM6331215
	25783	L1	LEC	TC	L2/3-IT	GSM6810524				15476	I1	LEC	TC	L4	GSM6785763				8634	E1	cortex	OC	L4_6	GSM6331517
	22943	K1	FI	FC	L4_6	GSM6837414				22371	L2	A1C	TC	L4	GSM7294200				8691	E1	cortex	OC	L4_6	GSM6331848
	27124	L1	LEC	TC	L2/3-IT	GSM6812041				16059	I1	LEC	TC	L2-IT	GSM6786589				8698	E1	cortex	OC	L4_6	GSM6332066
	24080	K1	FI	FC	L4_6	GSM6838645				9947	E4	MTG	TC	L2-IT	GSM5162546				8705	E1	cortex	OC	L4_6	GSM6332407
	24831	K1	FI	FC	L4_6	GSM6839447				16369	I1	LEC	TC	L2-IT	GSM6786983				8706	E1	cortex	OC	L4_6	GSM6332425
	9279	D4	MTG	TC	L2/3-IT	GSM6798908				9805	E4	MTG	TC	L2-IT	GSM5161554				8746	E1	cortex	OC	L4_6	GSM6332779
	25453	L1	LEC	TC	L2/3-IT	GSM6810163				9992	E4	MTG	TC	L2-IT	GSM5163097				10799	F2	cortex	TC	L2/3-IT	GSM6356237
	27565	L1	LEC	TC	L2/3-IT	GSM6812544				15107	I1	LEC	TC	L2-IT	GSM6785046				10800	F2	cortex	TC	L4_6	GSM6356259
	9412	D4	MTG	TC	L4_6	GSM6798617				16206	I1	LEC	TC	L2-IT	GSM6786773				10818	F2	cortex	TC	L2/3-IT	GSM6356463
	25428	L1	LEC	TC	L4_6	GSM6810131				9770	E4	MTG	TC	L4	GSM5161308				10819	F2	cortex	TC	L2/3-IT	GSM6356465
	26876	L1	LEC	TC	L4_6	GSM6811764				9961	E4	MTG	TC	L4	GSM5162762				10881	F2	cortex	TC	L4_6	GSM6356782
	27149	L1	LEC	TC	L4_6	GSM6812069				17347	J1	MEC	TC	L4	GSM6226888				10890	F2	cortex	TC	L2/3-IT	GSM6357355
	16333	H3	A24	FC	L2/3-IT	GSM6869244				15396	I1	LEC	TC	L2-IT	GSM6785643				10894	F2	cortex	TC	L2/3-IT	GSM6357680
	20494	J1	V1C	OC	L2/3-IT	GSM6740323				9853	E4	MTG	TC	L4	GSM5161840				10899	F2	cortex	TC	L4_6	GSM6357713
	26401	L1	LEC	TC	L2/3-IT	GSM6811237				15921	I1	LEC	TC	L4	GSM6786406				10908	F2	cortex	TC	L2/3-IT	GSM6357757
	27057	L1	LEC	TC	L2/3-IT	GSM6811965				16365	I1	LEC	TC	L4	GSM6786978				10919	F2	cortex	TC	L4_6	GSM6357818
	8864	D3	A46	FC	L4_6	GSM6790335				17458	J1	MEC	TC	L4	GSM6227099				10920	F2	cortex	TC	L4_6	GSM6357819
	24079	K1	FI	FC	L4_6	GSM6838644				9762	E4	MTG	TC	L2-IT	GSM5161282				10936	F2	cortex	TC	L4_6	GSM6357947
	24932	K1	FI	FC	L4_6	GSM6839558				15750	I1	LEC	TC	L2-IT	GSM6786186				10937	F2	cortex	TC	L4_6	GSM6357950
	25677	L1	LEC	TC	L2/3-IT	GSM6810403				16044	I1	LEC	TC	L2-IT	GSM6786569				10979	F2	cortex	TC	L2/3-IT	GSM6358651
	13336	F4	CA1R	HIP	CA	GSM5881771				15155	I1	LEC	TC	L4	GSM6785100				10992	F2	cortex	TC	L4_6	GSM6358719
	8871	D3	A46	FC	L4_6	GSM6790083				16374	I1	LEC	TC	L2-IT	GSM6786989				11023	F2	cortex	TC	L4_6	GSM6358806
	24103	K1	FI	FC	L4_6	GSM6838671				15106	I1	LEC	TC	L4	GSM6785045				11043	F2	cortex	TC	L4_6	GSM6358868
	8641	D3	A46	FC	L4_6	GSM6790019				15407	I1	LEC	TC	L2-IT	GSM6785656				11058	F2	cortex	TC	L4_6	GSM6358910
	8643	D3	A46	FC	L4_6	GSM6790167				9952	E4	MTG	TC	L4	GSM5162606				11066	F2	cortex	TC	L2/3-IT	GSM6359001
	22902	K1	FI	FC	L4_6	GSM6837373				15031	I1	LEC	TC	L4	GSM6784938				11746	G1	cortex	PC	L2/3-IT	GSM6307704
	23255	K1	FI	FC	L4_6	GSM6837749				16554	I1	LEC	TC	L4	GSM6787266				11748	G1	cortex	PC	L2/3-IT	GSM6307710
	24414	K1	FI	FC	L2/3-IT	GSM6839001				9667	E4	MTG	TC	L2-IT	GSM5160809				11750	G1	cortex	PC	L2/3-IT	GSM6307713
	26924	L1	LEC	TC	L2/3-IT	GSM6811818				9706	E4	MTG	TC	L2-IT	GSM5161025				11751	G1	cortex	PC	L2/3-IT	GSM6307714
	27269	L1	LEC	TC	L2/3-IT	GSM6812199				9782	E4	MTG	TC	L2-IT	GSM5161335				11758	G1	cortex	PC	L2/3-IT	GSM6307725
	8736	D3	A46	FC	L4_6	GSM6791404				9641	E4	MTG	TC	L4	GSM5160547				11764	G1	cortex	PC	L4_6	GSM6307735
	21995	J1	V1C	OC	L4_6	GSM6742040				16194	I1	LEC	TC	L4	GSM6786757				11769	G1	cortex	PC	L2/3-IT	GSM6307744
	25420	L1	LEC	TC	L4_6	GSM6810123				16227	I1	LEC	TC	L4	GSM6786802				11774	G1	cortex	PC	L4_6	GSM6307756
	26187	L1	LEC	TC	L4_6	GSM6810993				15468	I1	LEC	TC	L2-IT	GSM6785752				11782	G1	cortex	PC	L2/3-IT	GSM6307772
	27194	L1	LEC	TC	L4_6	GSM6812117				16196	I1	LEC	TC	L2-IT	GSM6786759				11785	G1	cortex	PC	L4_6	GSM6307786
	27677	L1	LEC	TC	L4_6	GSM6812666				16745	I1	LEC	TC	L2-IT	GSM6787512				11816	G1	cortex	PC	L2/3-IT	GSM6307881
	8560	D3	A46	FC	L2/3-IT	GSM6790033				16980	I1	LEC	TC	L4	GSM6787809				11818	G1	cortex	PC	L2/3-IT	GSM6307886
	25032	K1	FI	FC	L4_6	GSM6839671				9601	E4	MTG	TC	L2-IT	GSM5160205				11823	G1	cortex	PC	L2/3-IT	GSM6307905
	26805	L1	LEC	TC	L4_6	GSM6811686				16080	I1	LEC	TC	L2-IT	GSM6786610				11828	G1	cortex	PC	L4_6	GSM6307916
	27234	L1	LEC	TC	L4_6	GSM6812160				16913	I1	LEC	TC	L2-IT	GSM6787732				11830	G1	cortex	PC	L2/3-IT	GSM6307921
	27866	L1	LEC	TC	L2/3-IT	GSM6812885				9803	E4	MTG	TC	L4	GSM5161530				11838	G1	cortex	PC	L4_6	GSM6307941
	19920	J1	V1C	OC	L4_6	GSM6739673				10005	E4	MTG	TC	L4	GSM5163166				11841	G1	cortex	PC	L4_6	GSM6307944
	8547	D3	A46	FC	L2/3-IT	GSM6789487				16631	I1	LEC	TC	L4	GSM6787376				11846	G1	cortex	PC	L2/3-IT	GSM6307959
	23990	K1	FI	FC	L2/3-IT	GSM6838552				9845	E4	MTG	TC	L2-IT	GSM5161767				11856	G1	cortex	PC	L2/3-IT	GSM6307972
	24647	K1	FI	FC	L4_6	GSM6839257				15135	I1	LEC	TC	L2-IT	GSM6785077				11859	G1	cortex	PC	L2/3-IT	GSM6307977
	25446	L1	LEC	TC	L4_6	GSM6810154				15478	I1	LEC	TC	L2-IT	GSM6785765				11863	G1	cortex	PC	L2/3-IT	GSM6307984
	26822	L1	LEC	TC	L4_6	GSM6811706				15711	I1	LEC	TC	L2-IT	GSM6786142				11865	G1	cortex	PC	L4_6	GSM6307987
	24025	K1	FI	FC	L2/3-IT	GSM6838589				9766	E4	MTG	TC	L4	GSM5161298				11889	G1	cortex	PC	L4_6	GSM6308090
	24519	K1	FI	FC	L2/3-IT	GSM6839116				15075	I1	LEC	TC	L4	GSM6785003				11903	G1	cortex	PC	L2/3-IT	GSM6308214
	19718	J1	V1C	OC	L2/3-IT	GSM6739454				9613	E4	MTG	TC	L2-IT	GSM5160451				11958	G1	cortex	PC	L4_6	GSM6308489
	26850	L1	LEC	TC	L2/3-IT	GSM6811735				9896	E4	MTG	TC	L2-IT	GSM5162189				11960	G1	cortex	PC	L4_6	GSM6308498
	27356	L1	LEC	TC	L2/3-IT	GSM6812297				10024	E4	MTG	TC	L4	GSM5163216				12044	G1	cortex	PC	L2/3-IT	GSM6308797
	23395	K1	FI	FC	L4_6	GSM6837904				9954	E4	MTG	TC	L2-IT	GSM5162608				12050	G1	cortex	PC	L2/3-IT	GSM6308806
	25044	K1	FI	FC	L4_6	GSM6839683				17057	I1	LEC	TC	L2-IT	GSM6787894				12097	G1	cortex	PC	L4_6	GSM6308945
	25777	L1	LEC	TC	L4_6	GSM6810516				9715	E4	MTG	TC	L4	GSM5161071				12134	G1	cortex	PC	L2/3-IT	GSM6309029
	8506	D3	A46	FC	L2/3-IT	GSM6789882				9724	E4	MTG	TC	L4	GSM5161136				12151	G1	cortex	PC	L4_6	GSM6309065
	26257	L1	LEC	TC	L2/3-IT	GSM6811073				15486	I1	LEC	TC	L4	GSM6785776				12233	G1	cortex	PC	L4_6	GSM6310026
	23472	K1	FI	FC	L4_6	GSM6837990				9696	E4	MTG	TC	L2-IT	GSM5160951				12274	G1	cortex	PC	L2/3-IT	GSM6310179
	26986	L1	LEC	TC	L2/3-IT	GSM6811890				9726	E4	MTG	TC	L2-IT	GSM5161142				12281	G1	cortex	PC	L2/3-IT	GSM6310209
	9394	D4	MTG	TC	L4_6	GSM6799195				15608	I1	LEC	TC	L2-IT	GSM6785964				12306	G1	cortex	PC	L2/3-IT	GSM6310425
	9401	D4	MTG	TC	L4_6	GSM6798784				16175	I1	LEC	TC	L2-IT	GSM6786732				12315	G1	cortex	PC	L2/3-IT	GSM6310477
	25884	L1	LEC	TC	L4_6	GSM6810639				16604	I1	LEC	TC	L2-IT	GSM6787346				12321	G1	cortex	PC	L2/3-IT	GSM6310486
	23362	K1	FI	FC	L2/3-IT	GSM6837869				15720	I1	LEC	TC	L2-IT	GSM6786152				12335	G1	cortex	PC	L4_6	GSM6310565
	26826	L1	LEC	TC	L2/3-IT	GSM6811710				16321	I1	LEC	TC	L2-IT	GSM6786926				12336	G1	cortex	PC	L4_6	GSM6310569
	8778	D3	A46	FC	L4_6	GSM6789462				413	A1	A5-A7	PC	L4	GSM5422254				12454	G2	cortex	FC	L4_6	GSM6315290
[truncated: 2,027 more rows]
